# Supplementary material for: RNA-Seq Profiling of Spinal Cord Motor Neurons from a Presymptomatic SOD1 ALS Mouse
Source: PubMed Central journal article supplement (PMC3536741; doi:10.1371/journal.pone.0053575), 2013-01-03

A)

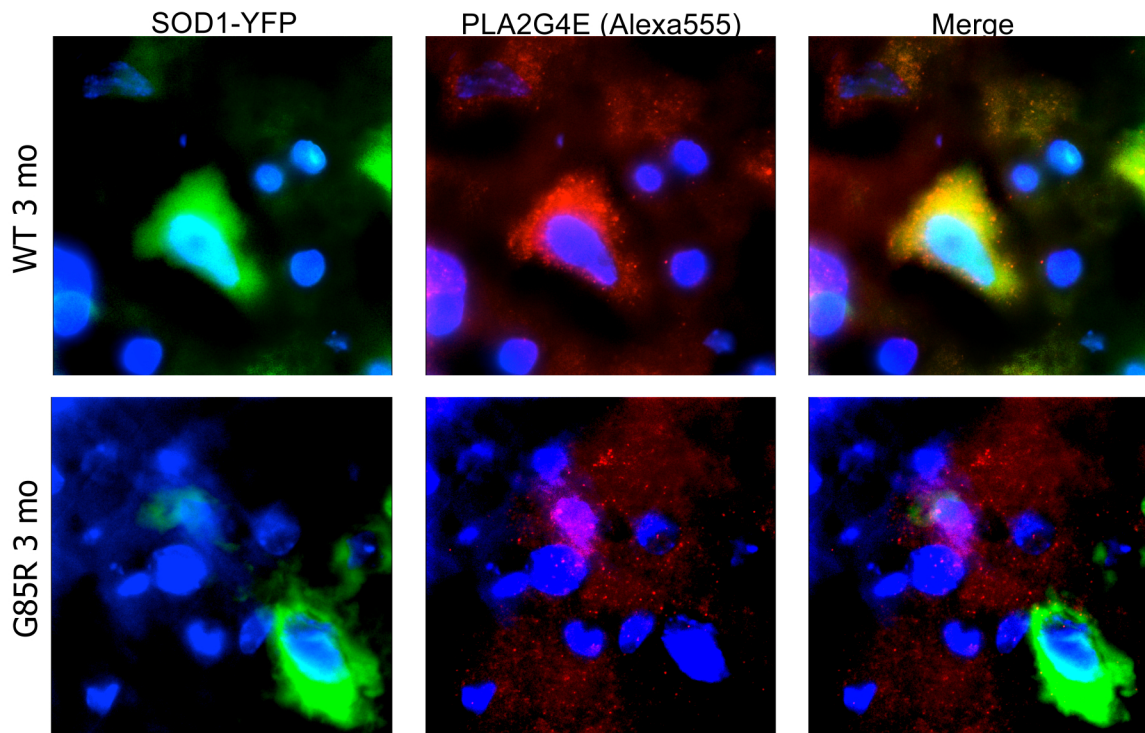

B)

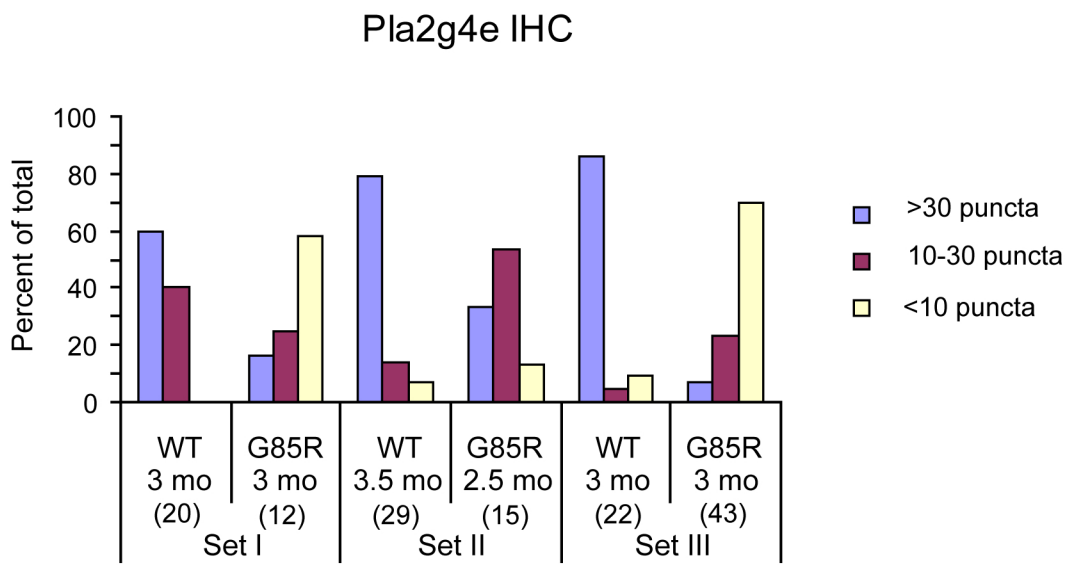

Supplement: pone.0053575.s004.pdf [file pone.0053575.s004.pdf]
