# Supplementary material for: RNA-Seq Profiling of Spinal Cord Motor Neurons from a Presymptomatic SOD1 ALS Mouse
Source: PLoS One. 2013 Jan 3;8(1):e53575. doi: 10.1371/journal.pone.0053575 (PMC3536741; doi:10.1371/journal.pone.0053575)
Supplement: Table S1 — Sequencing Statistics. Total and uniquely mapped reads for wild-type and G85R motor neurons. Total genes detected as expressed for each sample are defined as any gene with an RPKM greater than zero from original read mapping. The total level of gene expression for each sample was determined as the sum of RPKM for all genes. (XLSX) [file pone.0053575.s006.xlsx]

## Sheet: Table_S1_Sequencing_Stats
Sample	Total Reads	Uniquely Mapped	% Uniquely Mapped	# Genes Expressed (RPKM >0)	Total RPKM
WT_1	40319450	29235642	72.51	17121	387126
WT_2	41879240	31066893	74.1821	17398	388781
G85R_1	40741475	26704441	65.5461	17116	392209
G85R_2	42439493	28362814	66.8312	17316	393780
