# Supplementary material for: RNA-Seq Profiling of Spinal Cord Motor Neurons from a Presymptomatic SOD1 ALS Mouse
Source: PLoS One. 2013 Jan 3;8(1):e53575. doi: 10.1371/journal.pone.0053575 (PMC3536741; doi:10.1371/journal.pone.0053575)
Supplement: Table S3 — DAVID output for genes with increased levels in G85R. Full DAVID output [S2,S3] for genes identified as having increased levels in G85R from Table S2 (BHP ≤0.05 and/or raw p-value ≤0.05 and log2 fold change ≥2). (XLSX) [file pone.0053575.s008.xlsx]

## Sheet: Table_S3_G85R_Down_DAVID
Annotation Cluster 1	Enrichment Score: 2.202732266562296
Category	Term	Count	%	PValue	Genes	List Total	Pop Hits	Pop Total	Fold Enrichment	Bonferroni	Benjamini	FDR
GOTERM_MF_FAT	GO:0005179~hormone activity	7	0.646353	9.934e-05	CALCA, CALCB, UTS2, NTS, UTS2D, CARTPT, VGF	82	107	11595	9.25063	0.0233668	0.0233668	0.127977
GOTERM_BP_FAT	GO:0003013~circulatory system process	6	0.554017	0.000767672	CALCA, CALCB, NTS, CARTPT, ATP1A1, NRG1	79	110	11876	8.19977	0.536401	0.536401	1.20619
GOTERM_BP_FAT	GO:0008015~blood circulation	6	0.554017	0.000767672	CALCA, CALCB, NTS, CARTPT, ATP1A1, NRG1	79	110	11876	8.19977	0.536401	0.536401	1.20619
SP_PIR_KEYWORDS	cleavage on pair of basic residues	8	0.738689	0.000835039	CALCA, CALCB, UTS2, NTS, UTS2D, CARTPT, SCG5, PDGFD	104	229	15501	5.20692	0.148904	0.148904	1.03556
GOTERM_BP_FAT	GO:0008217~regulation of blood pressure	4	0.369344	0.00851981	CALCA, CARTPT, ATP1A1, NRG1	79	64	11876	9.39557	0.999809	0.705817	12.6463
SP_PIR_KEYWORDS	hormone	4	0.369344	0.025389	CALCA, CALCB, UTS2, UTS2D	104	95	15501	6.27571	0.993011	0.56274	27.418
GOTERM_BP_FAT	GO:0050880~regulation of blood vessel size	3	0.277008	0.0395449	CALCA, CALCB, NTS	79	48	11876	9.39557	1	0.880651	47.1424
GOTERM_BP_FAT	GO:0035150~regulation of tube size	3	0.277008	0.0395449	CALCA, CALCB, NTS	79	48	11876	9.39557	1	0.880651	47.1424
GOTERM_BP_FAT	GO:0003018~vascular process in circulatory system	3	0.277008	0.0425881	CALCA, CALCB, NTS	79	50	11876	9.01975	1	0.874384	49.7277
GOTERM_BP_FAT	GO:0051241~negative regulation of multicellular organismal process	3	0.277008	0.133337	CALCA, CARTPT, ATP1A1	79	97	11876	4.64935	1	0.932982	89.5785
Annotation Cluster 2	Enrichment Score: 1.7495994468395202
Category	Term	Count	%	PValue	Genes	List Total	Pop Hits	Pop Total	Fold Enrichment	Bonferroni	Benjamini	FDR
GOTERM_BP_FAT	GO:0031644~regulation of neurological system process	5	0.461681	0.00515672	CALCA, YWHAG, CARTPT, PRKACA, PPP3CA	79	106	11876	7.091	0.994345	0.64479	7.84478
GOTERM_BP_FAT	GO:0044057~regulation of system process	6	0.554017	0.0087219	CALCA, YWHAG, CARTPT, PRKACA, ATP1A1, PPP3CA	79	193	11876	4.67344	0.999845	0.665833	12.9272
KEGG_PATHWAY	mmu04114:Oocyte meiosis	5	0.461681	0.0114041	REC8, YWHAG, PRKACA, PTTG1, PPP3CA	46	105	5330	5.5176	0.671283	0.426662	11.8892
GOTERM_BP_FAT	GO:0051969~regulation of transmission of nerve impulse	4	0.369344	0.0279701	YWHAG, CARTPT, PRKACA, PPP3CA	79	100	11876	6.01316	1	0.849401	36.127
GOTERM_BP_FAT	GO:0050804~regulation of synaptic transmission	3	0.277008	0.124527	YWHAG, PRKACA, PPP3CA	79	93	11876	4.84933	1	0.930224	87.7724
Annotation Cluster 3	Enrichment Score: 1.5845487825914002
Category	Term	Count	%	PValue	Genes	List Total	Pop Hits	Pop Total	Fold Enrichment	Bonferroni	Benjamini	FDR
INTERPRO	IPR018029:C2 membrane targeting protein	5	0.461681	0.00366921	CPNE8, DYSF, SYT2, ITSN1, PLA2G4E	100	97	15228	7.84948	0.61406	0.378759	4.68851
INTERPRO	IPR000008:C2 calcium-dependent membrane targeting	5	0.461681	0.00732918	CPNE8, DYSF, SYT2, ITSN1, PLA2G4E	100	118	15228	6.45254	0.851214	0.37893	9.16225
SMART	SM00239:C2	5	0.461681	0.0100735	CPNE8, DYSF, SYT2, ITSN1, PLA2G4E	58	118	7921	5.78682	0.460763	0.460763	9.68094
UP_SEQ_FEATURE	domain:C2 1	3	0.277008	0.0507006	CPNE8, DYSF, SYT2	103	50	14102	8.21476	1	0.987681	50.7335
UP_SEQ_FEATURE	domain:C2 2	3	0.277008	0.0507006	CPNE8, DYSF, SYT2	103	50	14102	8.21476	1	0.987681	50.7335
SP_PIR_KEYWORDS	calcium	6	0.554017	0.446552	HPCAL1, SYT2, DLK2, ITSN1, PLA2G4E, CALB2	104	659	15501	1.35704	1	0.954309	99.9371
Annotation Cluster 4	Enrichment Score: 1.4359300553253527
Category	Term	Count	%	PValue	Genes	List Total	Pop Hits	Pop Total	Fold Enrichment	Bonferroni	Benjamini	FDR
GOTERM_CC_FAT	GO:0030424~axon	7	0.646353	0.000173608	CALCA, NRCAM, PRPH, CADM1, UCHL1, NEFL, NEFM	90	102	10970	8.36492	0.0290845	0.0290845	0.211593
GOTERM_CC_FAT	GO:0005883~neurofilament	3	0.277008	0.000640612	PRPH, NEFL, NEFM	90	5	10970	73.1333	0.103215	0.0530126	0.778738
INTERPRO	IPR006821:Intermediate filament, DNA-binding region	3	0.277008	0.000860182	PRPH, NEFL, NEFM	100	7	15228	65.2629	0.199791	0.199791	1.11786
GOTERM_CC_FAT	GO:0060053~neurofilament cytoskeleton	3	0.277008	0.00133112	PRPH, NEFL, NEFM	90	7	10970	52.2381	0.202634	0.0442782	1.6119
GOTERM_CC_FAT	GO:0043005~neuron projection	8	0.738689	0.00273722	CALCA, NRCAM, PRPH, CADM1, UCHL1, NEFL, CAMK2N1, NEFM	90	232	10970	4.20307	0.372471	0.0747217	3.28864
UP_SEQ_FEATURE	region of interest:Linker 2	3	0.277008	0.00326139	PRPH, NEFL, NEFM	103	12	14102	34.2282	0.668508	0.668508	4.34732
GOTERM_BP_FAT	GO:0045104~intermediate filament cytoskeleton organization	3	0.277008	0.0074945	PRPH, NEFL, NEFM	79	20	11876	22.5494	0.999463	0.714936	11.2079
GOTERM_BP_FAT	GO:0045103~intermediate filament-based process	3	0.277008	0.00985346	PRPH, NEFL, NEFM	79	23	11876	19.6081	0.99995	0.667581	14.4846
GOTERM_CC_FAT	GO:0042995~cell projection	11	1.0157	0.0107615	CALCA, NRCAM, PRPH, CADM1, PDLIM7, TNFRSF12A, UCHL1, ITSN1, NEFL, CAMK2N1, NEFM	90	532	10970	2.52026	0.841082	0.231078	12.3659
KEGG_PATHWAY	mmu05014:Amyotrophic lateral sclerosis (ALS)	4	0.369344	0.010865	PRPH, PPP3CA, NEFL, NEFM	46	55	5330	8.42688	0.65343	0.65343	11.3575
PIR_SUPERFAMILY	PIRSF002282:cytoskeletal keratin	3	0.277008	0.0456088	PRPH, NEFL, NEFM	53	48	7298	8.60613	0.954086	0.954086	37.9539
INTERPRO	IPR016044:Filament	3	0.277008	0.0597814	PRPH, NEFL, NEFM	100	61	15228	7.48918	1	0.76576	55.3026
INTERPRO	IPR001664:Intermediate filament protein	3	0.277008	0.0632747	PRPH, NEFL, NEFM	100	63	15228	7.25143	1	0.756052	57.424
INTERPRO	IPR018039:Intermediate filament protein, conserved site	3	0.277008	0.0632747	PRPH, NEFL, NEFM	100	63	15228	7.25143	1	0.756052	57.424
UP_SEQ_FEATURE	region of interest:Coil 1A	3	0.277008	0.0659414	PRPH, NEFL, NEFM	103	58	14102	7.08169	1	0.922842	60.4711
UP_SEQ_FEATURE	region of interest:Coil 1B	3	0.277008	0.0659414	PRPH, NEFL, NEFM	103	58	14102	7.08169	1	0.922842	60.4711
UP_SEQ_FEATURE	region of interest:Linker 1	3	0.277008	0.0659414	PRPH, NEFL, NEFM	103	58	14102	7.08169	1	0.922842	60.4711
UP_SEQ_FEATURE	region of interest:Rod	3	0.277008	0.0679426	PRPH, NEFL, NEFM	103	59	14102	6.96166	1	0.907282	61.6079
SP_PIR_KEYWORDS	Intermediate filament	3	0.277008	0.0694336	PRPH, NEFL, NEFM	104	65	15501	6.87914	0.999999	0.629183	59.2088
UP_SEQ_FEATURE	region of interest:Head	3	0.277008	0.0720045	PRPH, NEFL, NEFM	103	61	14102	6.73341	1	0.899359	63.8228
UP_SEQ_FEATURE	region of interest:Tail	3	0.277008	0.0740644	PRPH, NEFL, NEFM	103	62	14102	6.6248	1	0.88553	64.9003
GOTERM_BP_FAT	GO:0007010~cytoskeleton organization	5	0.461681	0.134584	PRPH, PDLIM7, CSRP1, NEFL, NEFM	79	300	11876	2.50549	1	0.931398	89.8131
GOTERM_CC_FAT	GO:0005882~intermediate filament	3	0.277008	0.180021	PRPH, NEFL, NEFM	90	95	10970	3.84912	1	0.846569	91.1201
GOTERM_CC_FAT	GO:0045111~intermediate filament cytoskeleton	3	0.277008	0.188789	PRPH, NEFL, NEFM	90	98	10970	3.73129	1	0.831097	92.2116
GOTERM_MF_FAT	GO:0005198~structural molecule activity	5	0.461681	0.285275	PRPH, MRPS23, MRPL55, NEFL, NEFM	82	387	11595	1.8269	1	0.988213	98.6824
GOTERM_BP_FAT	GO:0007017~microtubule-based process	3	0.277008	0.34365	UCHL1, NEFL, NEFM	79	185	11876	2.43777	1	0.984596	99.871
GOTERM_CC_FAT	GO:0005856~cytoskeleton	9	0.831025	0.551731	CORO2B, PRPH, PDLIM7, MICAL2, MYH7, CSRP1, NEFL, CAMK2N1, NEFM	90	984	10970	1.11484	1	0.972388	99.9944
GOTERM_CC_FAT	GO:0044430~cytoskeletal part	6	0.554017	0.631137	PRPH, PDLIM7, MYH7, NEFL, CAMK2N1, NEFM	90	663	10970	1.10307	1	0.987059	99.9995
GOTERM_CC_FAT	GO:0043228~non-membrane-bounded organelle	12	1.10803	0.832171	CORO2B, PRPH, REC8, MRPS23, PDLIM7, MICAL2, MRPL55, MYH7, CSRP1, NEFL, CAMK2N1, NEFM	90	1698	10970	0.861406	1	0.998634	100
GOTERM_CC_FAT	GO:0043232~intracellular non-membrane-bounded organelle	12	1.10803	0.832171	CORO2B, PRPH, REC8, MRPS23, PDLIM7, MICAL2, MRPL55, MYH7, CSRP1, NEFL, CAMK2N1, NEFM	90	1698	10970	0.861406	1	0.998634	100
Annotation Cluster 5	Enrichment Score: 1.3001817855689823
Category	Term	Count	%	PValue	Genes	List Total	Pop Hits	Pop Total	Fold Enrichment	Bonferroni	Benjamini	FDR
SP_PIR_KEYWORDS	signal	29	2.67775	0.0063929	SCPEP1, FGFR1, UTS2, CADM1, TNFRSF12A, SUSD2, DLK2, BCAM, EDIL3, DCN, VIPR2, CALCA, NRCAM, CALCB, C330005M16RIK, SCG5, PDGFD, SPP1, RAMP2, RET, H2-M3, UTS2D, CHODL, DKK3, PODXL2, NTS, PLXDC1, CARTPT, H2-DMA	104	2639	15501	1.63789	0.709976	0.338071	7.68066
UP_SEQ_FEATURE	signal peptide	29	2.67775	0.0189225	SCPEP1, FGFR1, UTS2, CADM1, TNFRSF12A, SUSD2, DLK2, BCAM, EDIL3, DCN, VIPR2, CALCA, NRCAM, CALCB, C330005M16RIK, SCG5, PDGFD, SPP1, RAMP2, RET, H2-M3, UTS2D, CHODL, DKK3, PODXL2, NTS, PLXDC1, CARTPT, H2-DMA	103	2634	14102	1.50739	0.998431	0.960385	22.889
SP_PIR_KEYWORDS	glycoprotein	30	2.77008	0.0570801	SCPEP1, FGFR1, KCNC4, CADM1, SYT2, SUSD2, UCHL1, DLK2, BCAM, DCN, VIPR2, ITM2A, CALCA, NRCAM, C330005M16RIK, ASPH, PDGFD, PPAP2A, NEFL, NEFM, SPP1, MEST, PHYHIPL, RAMP2, RET, CHODL, DKK3, PODXL2, PLXDC1, H2-DMA	104	3287	15501	1.36034	0.999988	0.643427	51.9233
SP_PIR_KEYWORDS	disulfide bond	22	2.03139	0.0633507	RAMP2, FGFR1, UTS2, CADM1, TNFRSF12A, SUSD2, UTS2D, CHODL, DLK2, BCAM, EDIL3, DCN, VIPR2, NRCAM, CALCA, DKK3, CALCB, PODXL2, CARTPT, SCG5, PDGFD, H2-DMA	104	2246	15501	1.45995	0.999997	0.650969	55.7588
UP_SEQ_FEATURE	disulfide bond	21	1.93906	0.142958	RAMP2, FGFR1, UTS2, CADM1, TNFRSF12A, SUSD2, UTS2D, CHODL, DLK2, BCAM, EDIL3, DCN, VIPR2, NRCAM, CALCA, DKK3, CALCB, CARTPT, SCG5, PDGFD, H2-DMA	103	2160	14102	1.33109	1	0.975874	87.7414
UP_SEQ_FEATURE	glycosylation site:N-linked (GlcNAc...)	27	2.49307	0.252807	SCPEP1, FGFR1, KCNC4, CADM1, SYT2, SUSD2, DLK2, BCAM, DCN, VIPR2, ITM2A, CALCA, NRCAM, C330005M16RIK, ASPH, PDGFD, PPAP2A, SPP1, MEST, PHYHIPL, RAMP2, RET, CHODL, DKK3, PODXL2, PLXDC1, H2-DMA	103	3147	14102	1.17466	1	0.995799	98.1035
Annotation Cluster 6	Enrichment Score: 1.2462012142527
Category	Term	Count	%	PValue	Genes	List Total	Pop Hits	Pop Total	Fold Enrichment	Bonferroni	Benjamini	FDR
GOTERM_BP_FAT	GO:0050770~regulation of axonogenesis	3	0.277008	0.0244505	TNFRSF12A, NEFL, NEFM	79	37	11876	12.1888	1	0.873172	32.3729
GOTERM_BP_FAT	GO:0045664~regulation of neuron differentiation	4	0.369344	0.0265534	YWHAG, TNFRSF12A, NEFL, NEFM	79	98	11876	6.13588	1	0.854011	34.64
GOTERM_BP_FAT	GO:0010975~regulation of neuron projection development	3	0.277008	0.0337244	TNFRSF12A, NEFL, NEFM	79	44	11876	10.2497	1	0.851594	41.8472
GOTERM_BP_FAT	GO:0010769~regulation of cell morphogenesis involved in differentiation	3	0.277008	0.0395449	TNFRSF12A, NEFL, NEFM	79	48	11876	9.39557	1	0.880651	47.1424
GOTERM_BP_FAT	GO:0031344~regulation of cell projection organization	3	0.277008	0.0457161	TNFRSF12A, NEFL, NEFM	79	52	11876	8.67283	1	0.869523	52.2612
GOTERM_BP_FAT	GO:0050767~regulation of neurogenesis	4	0.369344	0.0519067	YWHAG, TNFRSF12A, NEFL, NEFM	79	128	11876	4.69778	1	0.87154	56.9268
GOTERM_BP_FAT	GO:0051960~regulation of nervous system development	4	0.369344	0.0688732	YWHAG, TNFRSF12A, NEFL, NEFM	79	144	11876	4.17581	1	0.914833	67.6193
GOTERM_BP_FAT	GO:0060284~regulation of cell development	4	0.369344	0.0806015	YWHAG, TNFRSF12A, NEFL, NEFM	79	154	11876	3.90465	1	0.933698	73.4969
GOTERM_BP_FAT	GO:0022604~regulation of cell morphogenesis	3	0.277008	0.115868	TNFRSF12A, NEFL, NEFM	79	89	11876	5.06727	1	0.923324	85.7151
GOTERM_BP_FAT	GO:0032535~regulation of cellular component size	3	0.277008	0.261154	TNFRSF12A, NEFL, NEFM	79	151	11876	2.98667	1	0.968026	99.1626
Annotation Cluster 7	Enrichment Score: 1.1618893565754767
Category	Term	Count	%	PValue	Genes	List Total	Pop Hits	Pop Total	Fold Enrichment	Bonferroni	Benjamini	FDR
GOTERM_BP_FAT	GO:0009063~cellular amino acid catabolic process	3	0.277008	0.0441416	BCAT1, GOT1, GCSH	79	51	11876	8.84289	1	0.871795	51.0013
GOTERM_BP_FAT	GO:0009310~amine catabolic process	3	0.277008	0.0590243	BCAT1, GOT1, GCSH	79	60	11876	7.51646	1	0.89518	61.7622
GOTERM_BP_FAT	GO:0016054~organic acid catabolic process	3	0.277008	0.0929569	BCAT1, GOT1, GCSH	79	78	11876	5.78189	1	0.933653	78.5983
GOTERM_BP_FAT	GO:0046395~carboxylic acid catabolic process	3	0.277008	0.0929569	BCAT1, GOT1, GCSH	79	78	11876	5.78189	1	0.933653	78.5983
Annotation Cluster 8	Enrichment Score: 1.1071594233366662
Category	Term	Count	%	PValue	Genes	List Total	Pop Hits	Pop Total	Fold Enrichment	Bonferroni	Benjamini	FDR
GOTERM_BP_FAT	GO:0003013~circulatory system process	6	0.554017	0.000767672	CALCA, CALCB, NTS, CARTPT, ATP1A1, NRG1	79	110	11876	8.19977	0.536401	0.536401	1.20619
GOTERM_BP_FAT	GO:0008015~blood circulation	6	0.554017	0.000767672	CALCA, CALCB, NTS, CARTPT, ATP1A1, NRG1	79	110	11876	8.19977	0.536401	0.536401	1.20619
GOTERM_BP_FAT	GO:0008217~regulation of blood pressure	4	0.369344	0.00851981	CALCA, CARTPT, ATP1A1, NRG1	79	64	11876	9.39557	0.999809	0.705817	12.6463
GOTERM_BP_FAT	GO:0048878~chemical homeostasis	7	0.646353	0.0263183	CALCA, GOT1, CARTPT, PPP3CA, VGF, NRG1, CKB	79	347	11876	3.03258	1	0.871734	34.3902
GOTERM_BP_FAT	GO:0007631~feeding behavior	3	0.277008	0.0395449	CALCA, UCHL1, CARTPT	79	48	11876	9.39557	1	0.880651	47.1424
GOTERM_BP_FAT	GO:0042592~homeostatic process	8	0.738689	0.064271	CALCA, GOT1, ID2, CARTPT, PPP3CA, VGF, NRG1, CKB	79	541	11876	2.22298	1	0.906971	64.9956
GOTERM_BP_FAT	GO:0055082~cellular chemical homeostasis	5	0.461681	0.0847919	CALCA, CARTPT, PPP3CA, NRG1, CKB	79	253	11876	2.97093	1	0.926362	75.3426
GOTERM_BP_FAT	GO:0007267~cell-cell signaling	5	0.461681	0.103641	FGFR1, CARTPT, PPP3CA, VGF, NRG1	79	272	11876	2.7634	1	0.926298	82.2528
GOTERM_BP_FAT	GO:0019725~cellular homeostasis	5	0.461681	0.158753	CALCA, CARTPT, PPP3CA, NRG1, CKB	79	320	11876	2.34889	1	0.938641	93.4888
GOTERM_BP_FAT	GO:0019226~transmission of nerve impulse	4	0.369344	0.170841	NRCAM, CARTPT, PPP3CA, NRG1	79	217	11876	2.77104	1	0.946612	94.8199
GOTERM_BP_FAT	GO:0006873~cellular ion homeostasis	4	0.369344	0.219295	CALCA, PPP3CA, NRG1, CKB	79	246	11876	2.44438	1	0.954841	97.9996
GOTERM_BP_FAT	GO:0050801~ion homeostasis	4	0.369344	0.275567	CALCA, PPP3CA, NRG1, CKB	79	278	11876	2.16301	1	0.972275	99.3866
GOTERM_BP_FAT	GO:0007268~synaptic transmission	3	0.277008	0.307447	CARTPT, PPP3CA, NRG1	79	170	11876	2.65287	1	0.978303	99.6988
GOTERM_BP_FAT	GO:0007610~behavior	4	0.369344	0.429761	CALCA, UCHL1, CARTPT, NRG1	79	364	11876	1.65197	1	0.993689	99.986
GOTERM_BP_FAT	GO:0043085~positive regulation of catalytic activity	3	0.277008	0.467722	CALCA, CARTPT, NRG1	79	239	11876	1.88698	1	0.994806	99.9953
GOTERM_BP_FAT	GO:0044093~positive regulation of molecular function	3	0.277008	0.560138	CALCA, CARTPT, NRG1	79	284	11876	1.58798	1	0.998027	99.9998
GOTERM_BP_FAT	GO:0050877~neurological system process	8	0.738689	0.900345	CALCA, NRCAM, PDE6B, UCHL1, CARTPT, PPP3CA, NRG1, NEFL	79	1556	11876	0.7729	1	1	100
Annotation Cluster 9	Enrichment Score: 1.08927240925181
Category	Term	Count	%	PValue	Genes	List Total	Pop Hits	Pop Total	Fold Enrichment	Bonferroni	Benjamini	FDR
INTERPRO	IPR013151:Immunoglobulin	5	0.461681	0.0221619	NRCAM, FGFR1, CADM1, BCAM, NRG1	100	164	15228	4.64268	0.996986	0.619935	25.38
SP_PIR_KEYWORDS	cell adhesion	7	0.646353	0.0251951	NRCAM, PODXL2, CADM1, TNFRSF12A, BCAM, EDIL3, SPP1	104	338	15501	3.08679	0.992737	0.626558	27.2379
INTERPRO	IPR003598:Immunoglobulin subtype 2	5	0.461681	0.0258353	NRCAM, FGFR1, CADM1, BCAM, NRG1	100	172	15228	4.42674	0.998863	0.571478	28.9601
SMART	SM00408:IGc2	5	0.461681	0.0347914	NRCAM, FGFR1, CADM1, BCAM, NRG1	58	172	7921	3.97003	0.884683	0.660417	29.9615
INTERPRO	IPR007110:Immunoglobulin-like	7	0.646353	0.0391353	NRCAM, FGFR1, CADM1, H2-M3, BCAM, NRG1, H2-DMA	100	384	15228	2.77594	0.999968	0.683001	40.6374
GOTERM_BP_FAT	GO:0007155~cell adhesion	8	0.738689	0.0472015	NRCAM, RET, PODXL2, CADM1, TNFRSF12A, BCAM, EDIL3, SPP1	79	504	11876	2.38618	1	0.866903	53.422
GOTERM_BP_FAT	GO:0022610~biological adhesion	8	0.738689	0.0472015	NRCAM, RET, PODXL2, CADM1, TNFRSF12A, BCAM, EDIL3, SPP1	79	504	11876	2.38618	1	0.866903	53.422
INTERPRO	IPR013783:Immunoglobulin-like fold	7	0.646353	0.0554775	NRCAM, FGFR1, CADM1, H2-M3, BCAM, NRG1, H2-DMA	100	419	15228	2.54406	1	0.771966	52.5547
UP_SEQ_FEATURE	domain:Ig-like C2-type 1	4	0.369344	0.0597152	NRCAM, FGFR1, CADM1, BCAM	103	123	14102	4.45244	1	0.948854	56.7315
UP_SEQ_FEATURE	domain:Ig-like C2-type 2	4	0.369344	0.0608861	NRCAM, FGFR1, CADM1, BCAM	103	124	14102	4.41654	1	0.929637	57.4588
INTERPRO	IPR003006:Immunoglobulin/major histocompatibility complex, conserved site	3	0.277008	0.0632747	NRCAM, H2-M3, H2-DMA	100	63	15228	7.25143	1	0.756052	57.424
KEGG_PATHWAY	mmu04514:Cell adhesion molecules (CAMs)	4	0.369344	0.104622	NRCAM, CADM1, H2-M3, H2-DMA	46	135	5330	3.43317	0.999978	0.931426	70.4634
UP_SEQ_FEATURE	domain:Ig-like C2-type 3	3	0.277008	0.118752	NRCAM, FGFR1, BCAM	103	82	14102	5.009	1	0.962627	82.0933
GOTERM_BP_FAT	GO:0016337~cell-cell adhesion	3	0.277008	0.388633	NRCAM, RET, CADM1	79	204	11876	2.21072	1	0.989098	99.958
SP_PIR_KEYWORDS	Immunoglobulin domain	4	0.369344	0.401271	NRCAM, FGFR1, CADM1, BCAM	104	344	15501	1.73312	1	0.963115	99.8325
INTERPRO	IPR003599:Immunoglobulin subtype	3	0.277008	0.502169	NRCAM, CADM1, BCAM	100	258	15228	1.7707	1	0.999612	99.989
SMART	SM00409:IG	3	0.277008	0.558779	NRCAM, CADM1, BCAM	58	258	7921	1.58801	1	0.998048	99.9733
Annotation Cluster 10	Enrichment Score: 1.0268089167793981
Category	Term	Count	%	PValue	Genes	List Total	Pop Hits	Pop Total	Fold Enrichment	Bonferroni	Benjamini	FDR
GOTERM_CC_FAT	GO:0030424~axon	7	0.646353	0.000173608	CALCA, NRCAM, PRPH, CADM1, UCHL1, NEFL, NEFM	90	102	10970	8.36492	0.0290845	0.0290845	0.211593
GOTERM_BP_FAT	GO:0048469~cell maturation	5	0.461681	0.00107722	CALCA, NRCAM, FGFR1, RET, REC8	79	69	11876	10.8934	0.660022	0.416924	1.68868
GOTERM_BP_FAT	GO:0021700~developmental maturation	5	0.461681	0.00323129	CALCA, NRCAM, FGFR1, RET, REC8	79	93	11876	8.08221	0.960826	0.555115	4.98568
GOTERM_BP_FAT	GO:0030182~neuron differentiation	6	0.554017	0.0974828	NRCAM, FGFR1, RET, UCHL1, NRG1, NEFL	79	372	11876	2.42466	1	0.928106	80.2248
GOTERM_BP_FAT	GO:0048666~neuron development	5	0.461681	0.104684	NRCAM, FGFR1, RET, UCHL1, NEFL	79	273	11876	2.75328	1	0.923782	82.576
GOTERM_BP_FAT	GO:0031175~neuron projection development	4	0.369344	0.151826	NRCAM, FGFR1, UCHL1, NEFL	79	205	11876	2.93325	1	0.932943	92.588
GOTERM_BP_FAT	GO:0007409~axonogenesis	3	0.277008	0.270913	NRCAM, UCHL1, NEFL	79	155	11876	2.9096	1	0.971381	99.3213
GOTERM_BP_FAT	GO:0048812~neuron projection morphogenesis	3	0.277008	0.300157	NRCAM, UCHL1, NEFL	79	167	11876	2.70052	1	0.977643	99.6446
GOTERM_BP_FAT	GO:0000902~cell morphogenesis	4	0.369344	0.300702	NRCAM, UCHL1, NRG1, NEFL	79	292	11876	2.0593	1	0.97692	99.6489
GOTERM_BP_FAT	GO:0030030~cell projection organization	4	0.369344	0.307913	NRCAM, FGFR1, UCHL1, NEFL	79	296	11876	2.03147	1	0.977586	99.702
GOTERM_BP_FAT	GO:0048667~cell morphogenesis involved in neuron differentiation	3	0.277008	0.312299	NRCAM, UCHL1, NEFL	79	172	11876	2.62202	1	0.978165	99.7305
GOTERM_BP_FAT	GO:0032989~cellular component morphogenesis	4	0.369344	0.360277	NRCAM, UCHL1, NRG1, NEFL	79	325	11876	1.8502	1	0.986427	99.914
GOTERM_BP_FAT	GO:0048858~cell projection morphogenesis	3	0.277008	0.360357	NRCAM, UCHL1, NEFL	79	192	11876	2.34889	1	0.985877	99.9142
GOTERM_BP_FAT	GO:0000904~cell morphogenesis involved in differentiation	3	0.277008	0.379264	NRCAM, UCHL1, NEFL	79	200	11876	2.25494	1	0.988925	99.9466
GOTERM_BP_FAT	GO:0032990~cell part morphogenesis	3	0.277008	0.381612	NRCAM, UCHL1, NEFL	79	201	11876	2.24372	1	0.988851	99.9497
GOTERM_BP_FAT	GO:0050877~neurological system process	8	0.738689	0.900345	CALCA, NRCAM, PDE6B, UCHL1, CARTPT, PPP3CA, NRG1, NEFL	79	1556	11876	0.7729	1	1	100
Annotation Cluster 11	Enrichment Score: 1.0234993971702266
Category	Term	Count	%	PValue	Genes	List Total	Pop Hits	Pop Total	Fold Enrichment	Bonferroni	Benjamini	FDR
INTERPRO	IPR003131:Potassium channel, voltage dependent, Kv, tetramerisation	4	0.369344	0.00467696	KCNS3, KCNC4, KCTD4, KCNG1	100	52	15228	11.7138	0.703045	0.33284	5.94021
INTERPRO	IPR003968:Potassium channel, voltage dependent, Kv	3	0.277008	0.012285	KCNS3, KCNC4, KCNG1	100	26	15228	17.5708	0.9593	0.472868	14.9113
GOTERM_CC_FAT	GO:0034705~potassium channel complex	4	0.369344	0.017707	KCNS3, KCNC4, KCTD4, KCNG1	90	68	10970	7.16993	0.952029	0.315896	19.5841
GOTERM_CC_FAT	GO:0008076~voltage-gated potassium channel complex	4	0.369344	0.017707	KCNS3, KCNC4, KCTD4, KCNG1	90	68	10970	7.16993	0.952029	0.315896	19.5841
GOTERM_BP_FAT	GO:0006813~potassium ion transport	5	0.461681	0.0184884	KCNS3, KCNC4, ATP1A1, KCTD4, KCNG1	79	154	11876	4.88082	1	0.845569	25.5381
INTERPRO	IPR003091:Voltage-dependent potassium channel	3	0.277008	0.0228353	KCNS3, KCNC4, KCNG1	100	36	15228	12.69	0.997479	0.574591	26.0486
GOTERM_MF_FAT	GO:0005249~voltage-gated potassium channel activity	4	0.369344	0.029499	KCNS3, KCNC4, KCTD4, KCNG1	82	96	11595	5.89177	0.999196	0.907029	32.0212
SP_PIR_KEYWORDS	potassium transport	4	0.369344	0.0320152	KCNS3, KCNC4, ATP1A1, KCNG1	104	104	15501	5.73262	0.998127	0.592267	33.3331
GOTERM_BP_FAT	GO:0015672~monovalent inorganic cation transport	6	0.554017	0.0397611	KCNS3, KCNC4, ATP6V0E2, ATP1A1, KCTD4, KCNG1	79	286	11876	3.15376	1	0.868755	47.3301
GOTERM_CC_FAT	GO:0034703~cation channel complex	4	0.369344	0.0407951	KCNS3, KCNC4, KCTD4, KCNG1	90	94	10970	5.18676	0.999159	0.54467	39.838
SP_PIR_KEYWORDS	potassium	4	0.369344	0.0412211	KCNS3, KCNC4, ATP1A1, KCNG1	104	115	15501	5.18428	0.999704	0.594526	40.817
GOTERM_MF_FAT	GO:0030955~potassium ion binding	4	0.369344	0.0464381	KCNS3, KCNC4, ATP1A1, KCNG1	82	115	11595	4.91835	0.999988	0.940945	45.8249
UP_SEQ_FEATURE	short sequence motif:Selectivity filter	3	0.277008	0.0543771	KCNS3, KCNC4, KCNG1	103	52	14102	7.89881	1	0.977168	53.2671
GOTERM_MF_FAT	GO:0022843~voltage-gated cation channel activity	4	0.369344	0.0569143	KCNS3, KCNC4, KCTD4, KCNG1	82	125	11595	4.52488	0.999999	0.902157	53.0155
GOTERM_MF_FAT	GO:0005267~potassium channel activity	4	0.369344	0.0569143	KCNS3, KCNC4, KCTD4, KCNG1	82	125	11595	4.52488	0.999999	0.902157	53.0155
GOTERM_CC_FAT	GO:0005887~integral to plasma membrane	8	0.738689	0.058621	KCNS3, KCNC4, SLC22A18, BCAM, PPAP2A, NRG1, KCTD4, KCNG1	90	428	10970	2.2783	0.999965	0.546142	52.1446
GOTERM_CC_FAT	GO:0031226~intrinsic to plasma membrane	8	0.738689	0.0705247	KCNS3, KCNC4, SLC22A18, BCAM, PPAP2A, NRG1, KCTD4, KCNG1	90	447	10970	2.18146	0.999996	0.58855	59.0261
SP_PIR_KEYWORDS	potassium channel	3	0.277008	0.0770058	KCNS3, KCNC4, KCNG1	104	69	15501	6.48035	1	0.643362	63.1573
INTERPRO	IPR000210:BTB/POZ-like	4	0.369344	0.0875043	KCNS3, KCNC4, KCTD4, KCNG1	100	161	15228	3.78335	1	0.816232	69.7666
INTERPRO	IPR011333:BTB/POZ fold	4	0.369344	0.0875043	KCNS3, KCNC4, KCTD4, KCNG1	100	161	15228	3.78335	1	0.816232	69.7666
GOTERM_BP_FAT	GO:0006812~cation transport	7	0.646353	0.097304	KCNS3, KCNC4, ATP6V0E2, ATP1A1, PPP3CA, KCTD4, KCNG1	79	483	11876	2.17868	1	0.932567	80.1628
SMART	SM00225:BTB	4	0.369344	0.10916	KCNS3, KCNC4, KCTD4, KCNG1	58	161	7921	3.39302	0.999133	0.828427	68.7289
GOTERM_CC_FAT	GO:0034702~ion channel complex	4	0.369344	0.117009	KCNS3, KCNC4, KCTD4, KCNG1	90	147	10970	3.3167	1	0.711887	78.0884
GOTERM_MF_FAT	GO:0022832~voltage-gated channel activity	4	0.369344	0.125048	KCNS3, KCNC4, KCTD4, KCNG1	82	176	11595	3.21369	1	0.958387	82.1287
GOTERM_MF_FAT	GO:0005244~voltage-gated ion channel activity	4	0.369344	0.125048	KCNS3, KCNC4, KCTD4, KCNG1	82	176	11595	3.21369	1	0.958387	82.1287
GOTERM_BP_FAT	GO:0030001~metal ion transport	6	0.554017	0.13486	KCNS3, KCNC4, ATP1A1, PPP3CA, KCTD4, KCNG1	79	413	11876	2.18396	1	0.92839	89.8642
GOTERM_BP_FAT	GO:0006811~ion transport	8	0.738689	0.143454	KCNS3, KCNC4, SLC22A18, ATP6V0E2, ATP1A1, PPP3CA, KCTD4, KCNG1	79	662	11876	1.81667	1	0.930918	91.3435
INTERPRO	IPR005821:Ion transport	3	0.277008	0.155824	KCNS3, KCNC4, KCNG1	100	108	15228	4.23	1	0.946329	89.0611
GOTERM_MF_FAT	GO:0031420~alkali metal ion binding	4	0.369344	0.157272	KCNS3, KCNC4, ATP1A1, KCNG1	82	196	11595	2.88576	1	0.966416	88.9826
SP_PIR_KEYWORDS	voltage-gated channel	3	0.277008	0.223681	KCNS3, KCNC4, KCNG1	104	134	15501	3.3369	1	0.858385	95.7361
GOTERM_MF_FAT	GO:0005261~cation channel activity	4	0.369344	0.239101	KCNS3, KCNC4, KCTD4, KCNG1	82	242	11595	2.33723	1	0.986906	97.047
SP_PIR_KEYWORDS	ion transport	6	0.554017	0.252657	KCNS3, KCNC4, SLC22A18, ATP6V0E2, ATP1A1, KCNG1	104	511	15501	1.75008	1	0.87529	97.3457
GOTERM_MF_FAT	GO:0022836~gated channel activity	4	0.369344	0.301605	KCNS3, KCNC4, KCTD4, KCNG1	82	275	11595	2.05676	1	0.986043	99.0218
GOTERM_MF_FAT	GO:0046873~metal ion transmembrane transporter activity	4	0.369344	0.311194	KCNS3, KCNC4, KCTD4, KCNG1	82	280	11595	2.02003	1	0.985375	99.1815
GOTERM_MF_FAT	GO:0005216~ion channel activity	4	0.369344	0.408674	KCNS3, KCNC4, KCTD4, KCNG1	82	331	11595	1.70879	1	0.990257	99.8855
GOTERM_MF_FAT	GO:0022838~substrate specific channel activity	4	0.369344	0.429303	KCNS3, KCNC4, KCTD4, KCNG1	82	342	11595	1.65383	1	0.988319	99.9276
GOTERM_MF_FAT	GO:0022803~passive transmembrane transporter activity	4	0.369344	0.436746	KCNS3, KCNC4, KCTD4, KCNG1	82	346	11595	1.63471	1	0.987809	99.9388
GOTERM_MF_FAT	GO:0015267~channel activity	4	0.369344	0.436746	KCNS3, KCNC4, KCTD4, KCNG1	82	346	11595	1.63471	1	0.987809	99.9388
SP_PIR_KEYWORDS	ionic channel	3	0.277008	0.569589	KCNS3, KCNC4, KCNG1	104	286	15501	1.56344	1	0.977263	99.9973
SP_PIR_KEYWORDS	transport	10	0.923361	0.641676	KCNS3, RAMP2, RAB3B, KCNC4, SLC22A18, ATP6V0E2, SCG5, ATP1A1, CYB561, KCNG1	104	1458	15501	1.02228	1	0.983863	99.9997
GOTERM_BP_FAT	GO:0055085~transmembrane transport	3	0.277008	0.794684	KCNS3, SLC22A18, ATP6V0E2	79	444	11876	1.01574	1	0.999986	100
Annotation Cluster 12	Enrichment Score: 0.9983709683068865
Category	Term	Count	%	PValue	Genes	List Total	Pop Hits	Pop Total	Fold Enrichment	Bonferroni	Benjamini	FDR
GOTERM_BP_FAT	GO:0000165~MAPKKK cascade	4	0.369344	0.0301695	RET, PTPLAD1, CARTPT, NRG1	79	103	11876	5.83802	1	0.835329	38.373
GOTERM_BP_FAT	GO:0007243~protein kinase cascade	4	0.369344	0.174076	RET, PTPLAD1, CARTPT, NRG1	79	219	11876	2.74574	1	0.945014	95.1303
GOTERM_BP_FAT	GO:0007242~intracellular signaling cascade	9	0.831025	0.192565	CALCA, RET, RAB3B, CCND1, PTPLAD1, CARTPT, FBXO31, ITSN1, NRG1	79	849	11876	1.59359	1	0.944609	96.5949
Annotation Cluster 13	Enrichment Score: 0.9538750489556594
Category	Term	Count	%	PValue	Genes	List Total	Pop Hits	Pop Total	Fold Enrichment	Bonferroni	Benjamini	FDR
GOTERM_CC_FAT	GO:0045202~synapse	10	0.923361	0.000936411	NRCAM, RAB3B, CADM1, SYT2, PRKACA, ITSN1, NRG1, VAMP1, CAMK2N1, NEFM	90	312	10970	3.9067	0.147229	0.0517036	1.13643
SP_PIR_KEYWORDS	Synaptosome	3	0.277008	0.019051	ITSN1, VAMP1, CAMK2N1	104	32	15501	13.9733	0.975579	0.604687	21.3121
GOTERM_CC_FAT	GO:0019717~synaptosome	3	0.277008	0.0950395	ITSN1, VAMP1, CAMK2N1	90	64	10970	5.71354	1	0.677545	70.4274
SP_PIR_KEYWORDS	synapse	4	0.369344	0.15908	SYT2, ITSN1, VAMP1, CAMK2N1	104	207	15501	2.88016	1	0.79655	88.4554
GOTERM_CC_FAT	GO:0005624~membrane fraction	7	0.646353	0.187832	SYT2, ATP1A1, PPP3CA, PPAP2A, ITSN1, VAMP1, CAMK2N1	90	475	10970	1.79626	1	0.844558	92.0988
GOTERM_MF_FAT	GO:0016791~phosphatase activity	4	0.369344	0.198888	C330005M16RIK, ATP1A1, PPP3CA, PPAP2A	82	220	11595	2.57095	1	0.976944	94.2645
GOTERM_CC_FAT	GO:0005626~insoluble fraction	7	0.646353	0.207923	SYT2, ATP1A1, PPP3CA, PPAP2A, ITSN1, VAMP1, CAMK2N1	90	491	10970	1.73772	1	0.8349	94.1793
GOTERM_CC_FAT	GO:0000267~cell fraction	7	0.646353	0.282136	SYT2, ATP1A1, PPP3CA, PPAP2A, ITSN1, VAMP1, CAMK2N1	90	546	10970	1.56268	1	0.82812	98.2472
GOTERM_CC_FAT	GO:0030054~cell junction	6	0.554017	0.288846	CADM1, SYT2, ITSN1, VAMP1, CAMK2N1, CALB2	90	442	10970	1.6546	1	0.827262	98.4369
GOTERM_CC_FAT	GO:0042598~vesicular fraction	3	0.277008	0.419521	SYT2, ATP1A1, PPP3CA	90	176	10970	2.07765	1	0.928768	99.8687
SP_PIR_KEYWORDS	cell junction	4	0.369344	0.449066	SYT2, ITSN1, VAMP1, CAMK2N1	104	371	15501	1.60699	1	0.951576	99.9406
Annotation Cluster 14	Enrichment Score: 0.9371358973607821
Category	Term	Count	%	PValue	Genes	List Total	Pop Hits	Pop Total	Fold Enrichment	Bonferroni	Benjamini	FDR
GOTERM_MF_FAT	GO:0030247~polysaccharide binding	4	0.369344	0.0547358	FGFR1, SUSD2, CHODL, DCN	82	123	11595	4.59845	0.999998	0.931398	51.597
GOTERM_MF_FAT	GO:0001871~pattern binding	4	0.369344	0.0547358	FGFR1, SUSD2, CHODL, DCN	82	123	11595	4.59845	0.999998	0.931398	51.597
GOTERM_MF_FAT	GO:0005539~glycosaminoglycan binding	3	0.277008	0.179207	FGFR1, CHODL, DCN	82	110	11595	3.85643	1	0.973096	92.1578
GOTERM_MF_FAT	GO:0030246~carbohydrate binding	4	0.369344	0.332323	FGFR1, SUSD2, CHODL, DCN	82	291	11595	1.94368	1	0.987349	99.4522
Annotation Cluster 15	Enrichment Score: 0.8896636444031983
Category	Term	Count	%	PValue	Genes	List Total	Pop Hits	Pop Total	Fold Enrichment	Bonferroni	Benjamini	FDR
GOTERM_CC_FAT	GO:0031410~cytoplasmic vesicle	9	0.831025	0.041066	RAB3B, DYSF, CADM1, NTS, SYT2, SCG5, ITSN1, VAMP1, CYB561	90	481	10970	2.28067	0.999198	0.50976	40.045
GOTERM_CC_FAT	GO:0031982~vesicle	9	0.831025	0.0458843	RAB3B, DYSF, CADM1, NTS, SYT2, SCG5, ITSN1, VAMP1, CYB561	90	492	10970	2.22967	0.999659	0.516114	43.6186
SP_PIR_KEYWORDS	cytoplasmic vesicle	5	0.461681	0.0543584	DYSF, NTS, SYT2, VAMP1, CYB561	104	214	15501	3.48243	0.999979	0.659965	50.1651
GOTERM_CC_FAT	GO:0008021~synaptic vesicle	3	0.277008	0.102652	RAB3B, CADM1, SYT2	90	67	10970	5.45771	1	0.683619	73.3233
GOTERM_CC_FAT	GO:0030136~clathrin-coated vesicle	3	0.277008	0.197615	RAB3B, CADM1, SYT2	90	101	10970	3.62046	1	0.83175	93.1847
GOTERM_CC_FAT	GO:0016023~cytoplasmic membrane-bounded vesicle	6	0.554017	0.212576	RAB3B, CADM1, NTS, SYT2, SCG5, ITSN1	90	392	10970	1.86565	1	0.816002	94.5829
GOTERM_CC_FAT	GO:0030141~secretory granule	3	0.277008	0.215413	RAB3B, NTS, SCG5	90	107	10970	3.41745	1	0.807886	94.8163
GOTERM_CC_FAT	GO:0031988~membrane-bounded vesicle	6	0.554017	0.221369	RAB3B, CADM1, NTS, SYT2, SCG5, ITSN1	90	398	10970	1.83752	1	0.80525	95.2765
GOTERM_CC_FAT	GO:0044456~synapse part	4	0.369344	0.234009	RAB3B, CADM1, SYT2, CAMK2N1	90	206	10970	2.36677	1	0.790438	96.1314
GOTERM_CC_FAT	GO:0030135~coated vesicle	3	0.277008	0.257413	RAB3B, CADM1, SYT2	90	121	10970	3.02204	1	0.804479	97.3507
Annotation Cluster 16	Enrichment Score: 0.8820227957159118
Category	Term	Count	%	PValue	Genes	List Total	Pop Hits	Pop Total	Fold Enrichment	Bonferroni	Benjamini	FDR
GOTERM_BP_FAT	GO:0046907~intracellular transport	7	0.646353	0.0474276	SRP14, RAMP2, YWHAG, UCHL1, SCG5, PPP3CA, NEFM	79	400	11876	2.63076	1	0.857086	53.5963
GOTERM_BP_FAT	GO:0006886~intracellular protein transport	5	0.461681	0.0915232	SRP14, RAMP2, YWHAG, SCG5, PPP3CA	79	260	11876	2.89094	1	0.935764	78.0575
GOTERM_BP_FAT	GO:0034613~cellular protein localization	5	0.461681	0.115368	SRP14, RAMP2, YWHAG, SCG5, PPP3CA	79	283	11876	2.65599	1	0.926521	85.5868
GOTERM_BP_FAT	GO:0070727~cellular macromolecule localization	5	0.461681	0.117561	SRP14, RAMP2, YWHAG, SCG5, PPP3CA	79	285	11876	2.63735	1	0.922301	86.1412
GOTERM_BP_FAT	GO:0008104~protein localization	8	0.738689	0.178777	NRCAM, SRP14, RAMP2, RAB3B, YWHAG, SCG5, PPP3CA, H2-DMA	79	704	11876	1.70829	1	0.947274	95.5502
GOTERM_BP_FAT	GO:0006605~protein targeting	3	0.277008	0.191044	SRP14, YWHAG, PPP3CA	79	122	11876	3.69662	1	0.947531	96.492
GOTERM_BP_FAT	GO:0015031~protein transport	7	0.646353	0.206972	SRP14, RAMP2, RAB3B, YWHAG, SCG5, PPP3CA, H2-DMA	79	606	11876	1.73647	1	0.950937	97.438
GOTERM_BP_FAT	GO:0045184~establishment of protein localization	7	0.646353	0.211132	SRP14, RAMP2, RAB3B, YWHAG, SCG5, PPP3CA, H2-DMA	79	610	11876	1.72509	1	0.95046	97.6423
Annotation Cluster 17	Enrichment Score: 0.8216177414481449
Category	Term	Count	%	PValue	Genes	List Total	Pop Hits	Pop Total	Fold Enrichment	Bonferroni	Benjamini	FDR
GOTERM_BP_FAT	GO:0046034~ATP metabolic process	3	0.277008	0.103196	ATP6V0E2, ATP1A1, MYH7	79	83	11876	5.43358	1	0.929995	82.1129
GOTERM_BP_FAT	GO:0009205~purine ribonucleoside triphosphate metabolic process	3	0.277008	0.126715	ATP6V0E2, ATP1A1, MYH7	79	94	11876	4.79774	1	0.93001	88.2467
GOTERM_BP_FAT	GO:0009199~ribonucleoside triphosphate metabolic process	3	0.277008	0.128914	ATP6V0E2, ATP1A1, MYH7	79	95	11876	4.74724	1	0.929825	88.7056
GOTERM_BP_FAT	GO:0009144~purine nucleoside triphosphate metabolic process	3	0.277008	0.137794	ATP6V0E2, ATP1A1, MYH7	79	99	11876	4.55543	1	0.929361	90.3941
GOTERM_BP_FAT	GO:0009141~nucleoside triphosphate metabolic process	3	0.277008	0.149079	ATP6V0E2, ATP1A1, MYH7	79	104	11876	4.33642	1	0.932343	92.1994
GOTERM_BP_FAT	GO:0009150~purine ribonucleotide metabolic process	3	0.277008	0.167503	ATP6V0E2, ATP1A1, MYH7	79	112	11876	4.02667	1	0.945678	94.4803
GOTERM_BP_FAT	GO:0009259~ribonucleotide metabolic process	3	0.277008	0.181568	ATP6V0E2, ATP1A1, MYH7	79	118	11876	3.82193	1	0.947634	95.7833
GOTERM_BP_FAT	GO:0006163~purine nucleotide metabolic process	3	0.277008	0.253838	ATP6V0E2, ATP1A1, MYH7	79	148	11876	3.04721	1	0.966899	99.0215
Annotation Cluster 18	Enrichment Score: 0.8084761120860775
Category	Term	Count	%	PValue	Genes	List Total	Pop Hits	Pop Total	Fold Enrichment	Bonferroni	Benjamini	FDR
INTERPRO	IPR007110:Immunoglobulin-like	7	0.646353	0.0391353	NRCAM, FGFR1, CADM1, H2-M3, BCAM, NRG1, H2-DMA	100	384	15228	2.77594	0.999968	0.683001	40.6374
INTERPRO	IPR013783:Immunoglobulin-like fold	7	0.646353	0.0554775	NRCAM, FGFR1, CADM1, H2-M3, BCAM, NRG1, H2-DMA	100	419	15228	2.54406	1	0.771966	52.5547
KEGG_PATHWAY	mmu04514:Cell adhesion molecules (CAMs)	4	0.369344	0.104622	NRCAM, CADM1, H2-M3, H2-DMA	46	135	5330	3.43317	0.999978	0.931426	70.4634
GOTERM_BP_FAT	GO:0050778~positive regulation of immune response	3	0.277008	0.181568	CADM1, H2-M3, H2-DMA	79	118	11876	3.82193	1	0.947634	95.7833
GOTERM_BP_FAT	GO:0048584~positive regulation of response to stimulus	3	0.277008	0.295291	CADM1, H2-M3, H2-DMA	79	165	11876	2.73326	1	0.976876	99.6035
GOTERM_BP_FAT	GO:0002684~positive regulation of immune system process	3	0.277008	0.348438	CADM1, H2-M3, H2-DMA	79	187	11876	2.4117	1	0.985065	99.8851
GOTERM_BP_FAT	GO:0006955~immune response	4	0.369344	0.516348	CADM1, H2-M3, SUSD2, H2-DMA	79	415	11876	1.44896	1	0.996588	99.999
Annotation Cluster 19	Enrichment Score: 0.8082847515561941
Category	Term	Count	%	PValue	Genes	List Total	Pop Hits	Pop Total	Fold Enrichment	Bonferroni	Benjamini	FDR
GOTERM_BP_FAT	GO:0051789~response to protein stimulus	3	0.277008	0.0929569	FOS, CCND1, ID2	79	78	11876	5.78189	1	0.933653	78.5983
GOTERM_BP_FAT	GO:0010033~response to organic substance	6	0.554017	0.0966467	FOS, CCND1, ID2, H2-M3, SNRPN, VGF	79	371	11876	2.4312	1	0.93606	79.9334
SP_PIR_KEYWORDS	ubl conjugation	5	0.461681	0.418482	FOS, CCND1, ID2, MYH7, PTTG1	104	495	15501	1.50554	1	0.958019	99.8835
Annotation Cluster 20	Enrichment Score: 0.8009859075234042
Category	Term	Count	%	PValue	Genes	List Total	Pop Hits	Pop Total	Fold Enrichment	Bonferroni	Benjamini	FDR
GOTERM_MF_FAT	GO:0019901~protein kinase binding	3	0.277008	0.0796649	CCND1, YWHAG, CAMK2N1	82	67	11595	6.33145	1	0.940549	65.7035
GOTERM_MF_FAT	GO:0019900~kinase binding	3	0.277008	0.109797	CCND1, YWHAG, CAMK2N1	82	81	11595	5.23713	1	0.95384	77.6696
GOTERM_MF_FAT	GO:0019899~enzyme binding	3	0.277008	0.452049	CCND1, YWHAG, CAMK2N1	82	218	11595	1.94591	1	0.9886	99.9571
Annotation Cluster 21	Enrichment Score: 0.7984199401405235
Category	Term	Count	%	PValue	Genes	List Total	Pop Hits	Pop Total	Fold Enrichment	Bonferroni	Benjamini	FDR
SP_PIR_KEYWORDS	membrane	43	3.97045	0.0323608	FGFR1, KCNC4, RAB3B, SLC22A18, CADM1, TNFRSF12A, SYT2, PTPLAD1, SUSD2, 6330512M04RIK, DLK2, BCAM, ITSN1, VIPR2, ITM2A, NRCAM, KCNS3, PDE6B, PTGIS, DYSF, PACSIN3, ASPH, PPAP2A, KCNG1, MEST, RAMP2, RET, COL23A1, MXRA7, CHODL, ATP1A1, UBE2J2, SLC9A3R2, CYB561, CAMK2N1, PODXL2, COQ2, ATP6V0E2, PLXDC1, C030030A07RIK, H2-DMA, VAMP1, PLA2G4E	104	4918	15501	1.30319	0.998251	0.547793	33.6291
UP_SEQ_FEATURE	transmembrane region	36	3.3241	0.0342137	FGFR1, KCNC4, SLC22A18, CADM1, TNFRSF12A, SYT2, PTPLAD1, SUSD2, 6330512M04RIK, DLK2, BCAM, VIPR2, ITM2A, NRCAM, KCNS3, PTGIS, DYSF, ASPH, PPAP2A, KCNG1, MEST, RAMP2, RET, COL23A1, MXRA7, CHODL, ATP1A1, UBE2J2, CYB561, PODXL2, COQ2, ATP6V0E2, PLXDC1, C030030A07RIK, H2-DMA, VAMP1	103	3638	14102	1.35483	0.999992	0.980203	37.7278
UP_SEQ_FEATURE	topological domain:Cytoplasmic	26	2.40074	0.0586482	FGFR1, KCNC4, CADM1, TNFRSF12A, SYT2, SUSD2, DLK2, BCAM, VIPR2, KCNS3, NRCAM, DYSF, ASPH, PPAP2A, KCNG1, RAMP2, RET, COL23A1, CHODL, ATP1A1, UBE2J2, CYB561, PODXL2, PLXDC1, H2-DMA, VAMP1	103	2532	14102	1.4059	1	0.966783	56.0586
SP_PIR_KEYWORDS	transmembrane	37	3.41644	0.157805	FGFR1, KCNC4, SLC22A18, CADM1, TNFRSF12A, SYT2, PTPLAD1, SUSD2, 6330512M04RIK, DLK2, BCAM, VIPR2, ITM2A, NRCAM, KCNS3, PTGIS, DYSF, ASPH, PPAP2A, KCNG1, MEST, RAMP2, RET, COL23A1, H2-M3, MXRA7, CHODL, ATP1A1, UBE2J2, CYB561, PODXL2, COQ2, ATP6V0E2, PLXDC1, C030030A07RIK, H2-DMA, VAMP1	104	4643	15501	1.18776	1	0.809351	88.2352
UP_SEQ_FEATURE	topological domain:Extracellular	16	1.47738	0.466955	RAMP2, FGFR1, RET, COL23A1, CADM1, TNFRSF12A, SUSD2, CHODL, DLK2, BCAM, VIPR2, NRCAM, PODXL2, DYSF, PLXDC1, PPAP2A	103	1981	14102	1.10581	1	0.999976	99.9808
GOTERM_CC_FAT	GO:0016021~integral to membrane	39	3.60111	0.714939	FGFR1, KCNC4, SLC22A18, CADM1, TNFRSF12A, SYT2, PTPLAD1, SUSD2, 6330512M04RIK, DLK2, BCAM, VIPR2, ITM2A, NRCAM, KCNS3, PTGIS, DYSF, ASPH, PPAP2A, NRG1, KCNG1, MEST, RAMP2, RET, COL23A1, H2-M3, MXRA7, CHODL, ATP1A1, UBE2J2, KCTD4, CYB561, PODXL2, COQ2, ATP6V0E2, PLXDC1, C030030A07RIK, H2-DMA, VAMP1	90	4951	10970	0.960143	1	0.992164	100
GOTERM_CC_FAT	GO:0031224~intrinsic to membrane	40	3.69344	0.753222	FGFR1, KCNC4, SLC22A18, CADM1, TNFRSF12A, SYT2, PTPLAD1, SUSD2, 6330512M04RIK, DLK2, BCAM, VIPR2, ITM2A, NRCAM, KCNS3, PDE6B, PTGIS, DYSF, ASPH, PPAP2A, NRG1, KCNG1, MEST, RAMP2, RET, COL23A1, H2-M3, MXRA7, CHODL, ATP1A1, UBE2J2, KCTD4, CYB561, PODXL2, COQ2, ATP6V0E2, PLXDC1, C030030A07RIK, H2-DMA, VAMP1	90	5142	10970	0.948183	1	0.994939	100
Annotation Cluster 22	Enrichment Score: 0.7309425913298909
Category	Term	Count	%	PValue	Genes	List Total	Pop Hits	Pop Total	Fold Enrichment	Bonferroni	Benjamini	FDR
GOTERM_BP_FAT	GO:0001503~ossification	3	0.277008	0.144542	H2-M3, PDLIM7, SPP1	79	102	11876	4.42144	1	0.929259	91.5156
GOTERM_BP_FAT	GO:0060348~bone development	3	0.277008	0.17217	H2-M3, PDLIM7, SPP1	79	114	11876	3.95603	1	0.945513	94.9496
GOTERM_BP_FAT	GO:0001501~skeletal system development	4	0.369344	0.257763	FGFR1, H2-M3, PDLIM7, SPP1	79	268	11876	2.24372	1	0.967604	99.0998
Annotation Cluster 23	Enrichment Score: 0.6932786764947269
Category	Term	Count	%	PValue	Genes	List Total	Pop Hits	Pop Total	Fold Enrichment	Bonferroni	Benjamini	FDR
KEGG_PATHWAY	mmu04114:Oocyte meiosis	5	0.461681	0.0114041	REC8, YWHAG, PRKACA, PTTG1, PPP3CA	46	105	5330	5.5176	0.671283	0.426662	11.8892
GOTERM_BP_FAT	GO:0022403~cell cycle phase	4	0.369344	0.320551	REC8, CCND1, PTTG1, PPP3CA	79	303	11876	1.98454	1	0.979913	99.7773
GOTERM_BP_FAT	GO:0000278~mitotic cell cycle	3	0.277008	0.430004	CCND1, PTTG1, PPP3CA	79	222	11876	2.03147	1	0.993422	99.9861
GOTERM_BP_FAT	GO:0022402~cell cycle process	4	0.369344	0.431513	REC8, CCND1, PTTG1, PPP3CA	79	365	11876	1.64744	1	0.993282	99.9867
GOTERM_BP_FAT	GO:0007049~cell cycle	5	0.461681	0.503709	REC8, CCND1, FBXO31, PTTG1, PPP3CA	79	559	11876	1.34463	1	0.996174	99.9984
Annotation Cluster 24	Enrichment Score: 0.5804948645676568
Category	Term	Count	%	PValue	Genes	List Total	Pop Hits	Pop Total	Fold Enrichment	Bonferroni	Benjamini	FDR
SP_PIR_KEYWORDS	iron	5	0.461681	0.116236	PTGIS, C330005M16RIK, PPP3CA, ASPH, CYB561	104	280	15501	2.66157	1	0.73417	78.5561
GOTERM_MF_FAT	GO:0005506~iron ion binding	5	0.461681	0.156349	PTGIS, C330005M16RIK, PPP3CA, ASPH, CYB561	82	299	11595	2.36459	1	0.97474	88.8259
GOTERM_MF_FAT	GO:0046914~transition metal ion binding	8	0.738689	0.997879	PTGIS, PDLIM7, MICAL2, C330005M16RIK, PPP3CA, ASPH, CSRP1, CYB561	82	2263	11595	0.499876	1	1	100
Annotation Cluster 25	Enrichment Score: 0.5799649668037592
Category	Term	Count	%	PValue	Genes	List Total	Pop Hits	Pop Total	Fold Enrichment	Bonferroni	Benjamini	FDR
SP_PIR_KEYWORDS	Secreted	14	1.29271	0.0810556	SCPEP1, UTS2, UTS2D, EDIL3, DCN, CALCA, CALCB, DKK3, NTS, CARTPT, C330005M16RIK, SCG5, PDGFD, SPP1	104	1279	15501	1.63149	1	0.639275	65.1218
GOTERM_CC_FAT	GO:0005576~extracellular region	15	1.38504	0.327207	SCPEP1, UTS2, UTS2D, EDIL3, DCN, VGF, CALCA, CALCB, DKK3, NTS, CARTPT, C330005M16RIK, SCG5, PDGFD, SPP1	90	1498	10970	1.22052	1	0.86215	99.2053
GOTERM_CC_FAT	GO:0044421~extracellular region part	6	0.554017	0.686276	CALCA, DKK3, CARTPT, PDGFD, DCN, SPP1	90	706	10970	1.03588	1	0.989776	99.9999
Annotation Cluster 26	Enrichment Score: 0.5752262600387136
Category	Term	Count	%	PValue	Genes	List Total	Pop Hits	Pop Total	Fold Enrichment	Bonferroni	Benjamini	FDR
UP_SEQ_FEATURE	calcium-binding region:1	3	0.277008	0.176072	HPCAL1, ITSN1, CALB2	103	105	14102	3.91179	1	0.987274	92.8286
INTERPRO	IPR018248:EF hand	3	0.277008	0.176514	HPCAL1, ITSN1, CALB2	100	117	15228	3.90462	1	0.956879	92.0896
INTERPRO	IPR002048:Calcium-binding EF-hand	3	0.277008	0.183506	HPCAL1, ITSN1, CALB2	100	120	15228	3.807	1	0.95444	92.9234
SMART	SM00054:EFh	3	0.277008	0.213611	HPCAL1, ITSN1, CALB2	58	120	7921	3.41422	1	0.946694	91.0785
UP_SEQ_FEATURE	domain:EF-hand 1	3	0.277008	0.268907	HPCAL1, ITSN1, CALB2	103	140	14102	2.93384	1	0.996197	98.5899
UP_SEQ_FEATURE	domain:EF-hand 2	3	0.277008	0.268907	HPCAL1, ITSN1, CALB2	103	140	14102	2.93384	1	0.996197	98.5899
GOTERM_MF_FAT	GO:0005509~calcium ion binding	8	0.738689	0.280131	RET, HPCAL1, SYT2, DLK2, EDIL3, ITSN1, PLA2G4E, CALB2	82	760	11595	1.48845	1	0.989964	98.5547
INTERPRO	IPR018249:EF-HAND 2	3	0.277008	0.329517	HPCAL1, ITSN1, CALB2	100	181	15228	2.52398	1	0.995701	99.4604
INTERPRO	IPR018247:EF-HAND 1	3	0.277008	0.346131	HPCAL1, ITSN1, CALB2	100	188	15228	2.43	1	0.994699	99.6112
INTERPRO	IPR011992:EF-Hand type	3	0.277008	0.374296	HPCAL1, ITSN1, CALB2	100	200	15228	2.2842	1	0.995994	99.7813
SP_PIR_KEYWORDS	calcium	6	0.554017	0.446552	HPCAL1, SYT2, DLK2, ITSN1, PLA2G4E, CALB2	104	659	15501	1.35704	1	0.954309	99.9371
Annotation Cluster 27	Enrichment Score: 0.5467689164806714
Category	Term	Count	%	PValue	Genes	List Total	Pop Hits	Pop Total	Fold Enrichment	Bonferroni	Benjamini	FDR
INTERPRO	IPR001781:Zinc finger, LIM-type	3	0.277008	0.0760191	PDLIM7, MICAL2, CSRP1	100	70	15228	6.52629	1	0.793033	64.4001
SP_PIR_KEYWORDS	LIM domain	3	0.277008	0.0770058	PDLIM7, MICAL2, CSRP1	104	69	15501	6.48035	1	0.643362	63.1573
SMART	SM00132:LIM	3	0.277008	0.0901025	PDLIM7, MICAL2, CSRP1	58	70	7921	5.85296	0.996848	0.853384	61.3106
SP_PIR_KEYWORDS	zinc	5	0.461681	0.996406	PDLIM7, MICAL2, C330005M16RIK, PPP3CA, CSRP1	104	1645	15501	0.453034	1	1	100
GOTERM_MF_FAT	GO:0046914~transition metal ion binding	8	0.738689	0.997879	PTGIS, PDLIM7, MICAL2, C330005M16RIK, PPP3CA, ASPH, CSRP1, CYB561	82	2263	11595	0.499876	1	1	100
GOTERM_MF_FAT	GO:0008270~zinc ion binding	5	0.461681	0.999285	PDLIM7, MICAL2, C330005M16RIK, PPP3CA, CSRP1	82	1805	11595	0.391697	1	1	100
Annotation Cluster 28	Enrichment Score: 0.5340918975485813
Category	Term	Count	%	PValue	Genes	List Total	Pop Hits	Pop Total	Fold Enrichment	Bonferroni	Benjamini	FDR
GOTERM_BP_FAT	GO:0043066~negative regulation of apoptosis	4	0.369344	0.185536	FGFR1, ITSN1, NEFL, SPP1	79	226	11876	2.66069	1	0.946854	96.095
GOTERM_BP_FAT	GO:0043069~negative regulation of programmed cell death	4	0.369344	0.192173	FGFR1, ITSN1, NEFL, SPP1	79	230	11876	2.61442	1	0.946406	96.5686
GOTERM_BP_FAT	GO:0060548~negative regulation of cell death	4	0.369344	0.193842	FGFR1, ITSN1, NEFL, SPP1	79	231	11876	2.6031	1	0.943634	96.679
GOTERM_BP_FAT	GO:0042981~regulation of apoptosis	5	0.461681	0.441375	FGFR1, DFFA, ITSN1, NEFL, SPP1	79	516	11876	1.45668	1	0.993707	99.9899
GOTERM_BP_FAT	GO:0043067~regulation of programmed cell death	5	0.461681	0.450217	FGFR1, DFFA, ITSN1, NEFL, SPP1	79	522	11876	1.43993	1	0.994013	99.9922
GOTERM_BP_FAT	GO:0010941~regulation of cell death	5	0.461681	0.454622	FGFR1, DFFA, ITSN1, NEFL, SPP1	79	525	11876	1.43171	1	0.99416	99.9931
Annotation Cluster 29	Enrichment Score: 0.4547271334963936
Category	Term	Count	%	PValue	Genes	List Total	Pop Hits	Pop Total	Fold Enrichment	Bonferroni	Benjamini	FDR
INTERPRO	IPR006209:EGF	3	0.277008	0.183506	DLK2, EDIL3, NRG1	100	120	15228	3.807	1	0.95444	92.9234
INTERPRO	IPR000742:EGF-like, type 3	3	0.277008	0.336652	DLK2, EDIL3, NRG1	100	184	15228	2.48283	1	0.995085	99.5308
INTERPRO	IPR006210:EGF-like	3	0.277008	0.346131	DLK2, EDIL3, NRG1	100	188	15228	2.43	1	0.994699	99.6112
SMART	SM00181:EGF	3	0.277008	0.393684	DLK2, EDIL3, NRG1	58	188	7921	2.17929	1	0.987224	99.3474
SP_PIR_KEYWORDS	egf-like domain	3	0.277008	0.40795	DLK2, EDIL3, NRG1	104	210	15501	2.12926	1	0.96174	99.8543
INTERPRO	IPR013032:EGF-like region, conserved site	3	0.277008	0.544266	DLK2, EDIL3, NRG1	100	279	15228	1.63742	1	0.999709	99.9965
Annotation Cluster 30	Enrichment Score: 0.4256104155173161
Category	Term	Count	%	PValue	Genes	List Total	Pop Hits	Pop Total	Fold Enrichment	Bonferroni	Benjamini	FDR
GOTERM_BP_FAT	GO:0033554~cellular response to stress	6	0.554017	0.0991661	CCND1, PTPLAD1, CARTPT, FBXO31, PTTG1, NEFL	79	374	11876	2.4117	1	0.92672	80.7997
GOTERM_BP_FAT	GO:0007049~cell cycle	5	0.461681	0.503709	REC8, CCND1, FBXO31, PTTG1, PPP3CA	79	559	11876	1.34463	1	0.996174	99.9984
GOTERM_BP_FAT	GO:0006974~response to DNA damage stimulus	3	0.277008	0.524538	CCND1, FBXO31, PTTG1	79	266	11876	1.69544	1	0.996736	99.9992
SP_PIR_KEYWORDS	cell cycle	3	0.277008	0.757248	CCND1, FBXO31, PTTG1	104	407	15501	1.09863	1	0.994776	100
Annotation Cluster 31	Enrichment Score: 0.41983380023735234
Category	Term	Count	%	PValue	Genes	List Total	Pop Hits	Pop Total	Fold Enrichment	Bonferroni	Benjamini	FDR
GOTERM_BP_FAT	GO:0048609~reproductive process in a multicellular organism	5	0.461681	0.228042	CALCA, REC8, CCND1, CADM1, VGF	79	372	11876	2.02055	1	0.959179	98.3259
GOTERM_BP_FAT	GO:0032504~multicellular organism reproduction	5	0.461681	0.228042	CALCA, REC8, CCND1, CADM1, VGF	79	372	11876	2.02055	1	0.959179	98.3259
GOTERM_BP_FAT	GO:0019953~sexual reproduction	4	0.369344	0.405046	CALCA, REC8, CADM1, VGF	79	350	11876	1.71805	1	0.991132	99.9727
GOTERM_BP_FAT	GO:0007283~spermatogenesis	3	0.277008	0.445705	CALCA, REC8, CADM1	79	229	11876	1.96938	1	0.993853	99.9911
GOTERM_BP_FAT	GO:0048232~male gamete generation	3	0.277008	0.445705	CALCA, REC8, CADM1	79	229	11876	1.96938	1	0.993853	99.9911
GOTERM_BP_FAT	GO:0003006~reproductive developmental process	3	0.277008	0.472065	CALCA, REC8, VGF	79	241	11876	1.87132	1	0.994706	99.9959
GOTERM_BP_FAT	GO:0007276~gamete generation	3	0.277008	0.582818	CALCA, REC8, CADM1	79	296	11876	1.52361	1	0.998612	99.9999
Annotation Cluster 32	Enrichment Score: 0.3758544591933526
Category	Term	Count	%	PValue	Genes	List Total	Pop Hits	Pop Total	Fold Enrichment	Bonferroni	Benjamini	FDR
GOTERM_BP_FAT	GO:0006793~phosphorus metabolic process	9	0.831025	0.140175	FGFR1, RET, CCND1, ATP6V0E2, CARTPT, PRKACA, PPP3CA, PPAP2A, CAMKK1	79	782	11876	1.73013	1	0.929506	90.8046
GOTERM_BP_FAT	GO:0006796~phosphate metabolic process	9	0.831025	0.140175	FGFR1, RET, CCND1, ATP6V0E2, CARTPT, PRKACA, PPP3CA, PPAP2A, CAMKK1	79	782	11876	1.73013	1	0.929506	90.8046
SP_PIR_KEYWORDS	phosphotransferase	3	0.277008	0.184929	FGFR1, RET, PRKACA	104	118	15501	3.78936	1	0.833681	92.1761
SP_PIR_KEYWORDS	ATP	3	0.277008	0.243306	FGFR1, RET, PRKACA	104	142	15501	3.1489	1	0.873754	96.9008
GOTERM_BP_FAT	GO:0016310~phosphorylation	7	0.646353	0.244346	FGFR1, RET, CCND1, ATP6V0E2, CARTPT, PRKACA, CAMKK1	79	641	11876	1.64166	1	0.964517	98.8052
SP_PIR_KEYWORDS	transferase	11	1.0157	0.306294	BCAT1, FGFR1, RET, COQ2, GLYAT, GOT1, SULT2B1, PRKACA, ACLY, CAMKK1, CKB	104	1237	15501	1.32541	1	0.919602	98.9507
GOTERM_BP_FAT	GO:0006468~protein amino acid phosphorylation	6	0.554017	0.322363	FGFR1, RET, CCND1, CARTPT, PRKACA, CAMKK1	79	572	11876	1.57688	1	0.979663	99.7865
GOTERM_MF_FAT	GO:0032553~ribonucleotide binding	14	1.29271	0.349996	FGFR1, GNA14, RAB3B, RET, RABL5, ARL16, MYH7, ACLY, ATP1A1, UBE2J2, CAMKK1, CKB, PRKACA, H2-DMA	82	1632	11595	1.21301	1	0.98841	99.6124
GOTERM_MF_FAT	GO:0032555~purine ribonucleotide binding	14	1.29271	0.349996	FGFR1, GNA14, RAB3B, RET, RABL5, ARL16, MYH7, ACLY, ATP1A1, UBE2J2, CAMKK1, CKB, PRKACA, H2-DMA	82	1632	11595	1.21301	1	0.98841	99.6124
SP_PIR_KEYWORDS	nucleotide-binding	12	1.10803	0.408955	FGFR1, GNA14, RET, RAB3B, RABL5, PRKACA, ATP1A1, ACLY, MYH7, UBE2J2, CAMKK1, CKB	104	1496	15501	1.19557	1	0.958064	99.8574
GOTERM_MF_FAT	GO:0017076~purine nucleotide binding	14	1.29271	0.410036	FGFR1, GNA14, RAB3B, RET, RABL5, ARL16, MYH7, ACLY, ATP1A1, UBE2J2, CAMKK1, CKB, PRKACA, H2-DMA	82	1702	11595	1.16312	1	0.988728	99.8889
SP_PIR_KEYWORDS	kinase	6	0.554017	0.421547	FGFR1, RET, PACSIN3, PRKACA, CAMKK1, CKB	104	640	15501	1.39733	1	0.955278	99.8909
SP_PIR_KEYWORDS	magnesium	4	0.369344	0.431519	FGFR1, PRKACA, ATP1A1, ACLY	104	361	15501	1.6515	1	0.955595	99.9122
UP_SEQ_FEATURE	binding site:ATP	5	0.461681	0.481661	FGFR1, RET, PRKACA, CAMKK1, CKB	103	494	14102	1.38576	1	0.999974	99.9869
KEGG_PATHWAY	mmu05200:Pathways in cancer	4	0.369344	0.493315	FOS, FGFR1, RET, CCND1	46	311	5330	1.49028	1	0.991	99.9448
GOTERM_MF_FAT	GO:0004672~protein kinase activity	5	0.461681	0.502766	FGFR1, RET, CCND1, PRKACA, CAMKK1	82	525	11595	1.34669	1	0.992485	99.9877
INTERPRO	IPR017441:Protein kinase, ATP binding site	4	0.369344	0.515256	FGFR1, RET, PRKACA, CAMKK1	100	419	15228	1.45375	1	0.999596	99.9922
SP_PIR_KEYWORDS	atp-binding	9	0.831025	0.524788	FGFR1, RET, PRKACA, ATP1A1, ACLY, MYH7, UBE2J2, CAMKK1, CKB	104	1175	15501	1.14164	1	0.972395	99.9906
INTERPRO	IPR000719:Protein kinase, core	4	0.369344	0.545343	FGFR1, RET, PRKACA, CAMKK1	100	438	15228	1.39068	1	0.999611	99.9966
UP_SEQ_FEATURE	nucleotide phosphate-binding region:ATP	7	0.646353	0.561537	FGFR1, RET, PRKACA, ACLY, MYH7, CAMKK1, CKB	103	831	14102	1.1533	1	0.999991	99.9987
GOTERM_MF_FAT	GO:0005524~ATP binding	10	0.923361	0.575554	FGFR1, RET, PRKACA, ATP1A1, ACLY, MYH7, UBE2J2, H2-DMA, CAMKK1, CKB	82	1312	11595	1.07776	1	0.996537	99.9984
GOTERM_MF_FAT	GO:0032559~adenyl ribonucleotide binding	10	0.923361	0.59174	FGFR1, RET, PRKACA, ATP1A1, ACLY, MYH7, UBE2J2, H2-DMA, CAMKK1, CKB	82	1329	11595	1.06398	1	0.996857	99.999
UP_SEQ_FEATURE	domain:Protein kinase	4	0.369344	0.60402	FGFR1, RET, PRKACA, CAMKK1	103	429	14102	1.27657	1	0.999996	99.9997
GOTERM_MF_FAT	GO:0000166~nucleotide binding	14	1.29271	0.633012	FGFR1, GNA14, RAB3B, RET, RABL5, ARL16, MYH7, ACLY, ATP1A1, UBE2J2, CAMKK1, CKB, PRKACA, H2-DMA	82	1967	11595	1.00642	1	0.998124	99.9998
UP_SEQ_FEATURE	active site:Proton acceptor	5	0.461681	0.633364	FGFR1, RET, SULT2B1, PRKACA, CAMKK1	103	598	14102	1.14475	1	0.999998	99.9999
GOTERM_MF_FAT	GO:0030554~adenyl nucleotide binding	10	0.923361	0.655317	FGFR1, RET, PRKACA, ATP1A1, ACLY, MYH7, UBE2J2, H2-DMA, CAMKK1, CKB	82	1399	11595	1.01074	1	0.998231	99.9999
GOTERM_BP_FAT	GO:0048598~embryonic morphogenesis	3	0.277008	0.658665	FGFR1, RET, PRKACA	79	340	11876	1.32643	1	0.999654	100
GOTERM_MF_FAT	GO:0001883~purine nucleoside binding	10	0.923361	0.66652	FGFR1, RET, PRKACA, ATP1A1, ACLY, MYH7, UBE2J2, H2-DMA, CAMKK1, CKB	82	1412	11595	1.00143	1	0.998296	99.9999
GOTERM_MF_FAT	GO:0001882~nucleoside binding	10	0.923361	0.673314	FGFR1, RET, PRKACA, ATP1A1, ACLY, MYH7, UBE2J2, H2-DMA, CAMKK1, CKB	82	1420	11595	0.995792	1	0.998235	99.9999
Annotation Cluster 33	Enrichment Score: 0.34215305678785474
Category	Term	Count	%	PValue	Genes	List Total	Pop Hits	Pop Total	Fold Enrichment	Bonferroni	Benjamini	FDR
GOTERM_MF_FAT	GO:0005525~GTP binding	4	0.369344	0.382132	GNA14, RAB3B, RABL5, ARL16	82	317	11595	1.78426	1	0.989783	99.7984
GOTERM_MF_FAT	GO:0032561~guanyl ribonucleotide binding	4	0.369344	0.399227	GNA14, RAB3B, RABL5, ARL16	82	326	11595	1.735	1	0.990574	99.8596
GOTERM_MF_FAT	GO:0019001~guanyl nucleotide binding	4	0.369344	0.399227	GNA14, RAB3B, RABL5, ARL16	82	326	11595	1.735	1	0.990574	99.8596
UP_SEQ_FEATURE	nucleotide phosphate-binding region:GTP	3	0.277008	0.55551	GNA14, RAB3B, RABL5	103	256	14102	1.60444	1	0.999993	99.9984
SP_PIR_KEYWORDS	gtp-binding	3	0.277008	0.575292	GNA14, RAB3B, RABL5	104	289	15501	1.54721	1	0.976629	99.9977
Annotation Cluster 34	Enrichment Score: 0.34186494796954187
Category	Term	Count	%	PValue	Genes	List Total	Pop Hits	Pop Total	Fold Enrichment	Bonferroni	Benjamini	FDR
GOTERM_BP_FAT	GO:0006928~cell motion	4	0.369344	0.383638	NRCAM, RET, TNFRSF12A, NRG1	79	338	11876	1.77904	1	0.988726	99.9522
GOTERM_BP_FAT	GO:0016477~cell migration	3	0.277008	0.436761	RET, TNFRSF12A, NRG1	79	225	11876	2.00439	1	0.99353	99.9885
GOTERM_BP_FAT	GO:0048870~cell motility	3	0.277008	0.506043	RET, TNFRSF12A, NRG1	79	257	11876	1.75481	1	0.996148	99.9986
GOTERM_BP_FAT	GO:0051674~localization of cell	3	0.277008	0.506043	RET, TNFRSF12A, NRG1	79	257	11876	1.75481	1	0.996148	99.9986
Annotation Cluster 35	Enrichment Score: 0.2715636368943146
Category	Term	Count	%	PValue	Genes	List Total	Pop Hits	Pop Total	Fold Enrichment	Bonferroni	Benjamini	FDR
GOTERM_BP_FAT	GO:0042325~regulation of phosphorylation	3	0.277008	0.520467	CARTPT, PDGFD, NRG1	79	264	11876	1.70829	1	0.996664	99.9991
GOTERM_BP_FAT	GO:0051174~regulation of phosphorus metabolic process	3	0.277008	0.542573	CARTPT, PDGFD, NRG1	79	275	11876	1.63995	1	0.997462	99.9996
GOTERM_BP_FAT	GO:0019220~regulation of phosphate metabolic process	3	0.277008	0.542573	CARTPT, PDGFD, NRG1	79	275	11876	1.63995	1	0.997462	99.9996
Annotation Cluster 36	Enrichment Score: 0.2115152244060903
Category	Term	Count	%	PValue	Genes	List Total	Pop Hits	Pop Total	Fold Enrichment	Bonferroni	Benjamini	FDR
GOTERM_BP_FAT	GO:0031327~negative regulation of cellular biosynthetic process	4	0.369344	0.488187	SRP14, ID2, ATP1A1, NRG1	79	398	11876	1.51085	1	0.995515	99.9975
GOTERM_BP_FAT	GO:0009890~negative regulation of biosynthetic process	4	0.369344	0.494883	SRP14, ID2, ATP1A1, NRG1	79	402	11876	1.49581	1	0.995785	99.9979
GOTERM_BP_FAT	GO:0010558~negative regulation of macromolecule biosynthetic process	3	0.277008	0.725937	SRP14, ID2, NRG1	79	386	11876	1.16836	1	0.999922	100
GOTERM_BP_FAT	GO:0010605~negative regulation of macromolecule metabolic process	3	0.277008	0.812739	SRP14, ID2, NRG1	79	462	11876	0.976163	1	0.999991	100
Annotation Cluster 37	Enrichment Score: 0.1283700145973966
Category	Term	Count	%	PValue	Genes	List Total	Pop Hits	Pop Total	Fold Enrichment	Bonferroni	Benjamini	FDR
GOTERM_MF_FAT	GO:0005509~calcium ion binding	8	0.738689	0.280131	RET, HPCAL1, SYT2, DLK2, EDIL3, ITSN1, PLA2G4E, CALB2	82	760	11595	1.48845	1	0.989964	98.5547
GOTERM_MF_FAT	GO:0046872~metal ion binding	21	1.93906	0.843645	KCNC4, RET, HPCAL1, PDLIM7, MICAL2, SYT2, DLK2, ACLY, ATP1A1, EDIL3, CSRP1, ITSN1, CYB561, CALB2, KCNS3, PTGIS, C330005M16RIK, ASPH, PPP3CA, PLA2G4E, KCNG1	82	3380	11595	0.878536	1	0.999965	100
GOTERM_MF_FAT	GO:0043169~cation binding	21	1.93906	0.856216	KCNC4, RET, HPCAL1, PDLIM7, MICAL2, SYT2, DLK2, ACLY, ATP1A1, EDIL3, CSRP1, ITSN1, CYB561, CALB2, KCNS3, PTGIS, C330005M16RIK, ASPH, PPP3CA, PLA2G4E, KCNG1	82	3412	11595	0.870296	1	0.999972	100
GOTERM_MF_FAT	GO:0043167~ion binding	21	1.93906	0.873341	KCNC4, RET, HPCAL1, PDLIM7, MICAL2, SYT2, DLK2, ACLY, ATP1A1, EDIL3, CSRP1, ITSN1, CYB561, CALB2, KCNS3, PTGIS, C330005M16RIK, ASPH, PPP3CA, PLA2G4E, KCNG1	82	3459	11595	0.858471	1	0.999982	100
SP_PIR_KEYWORDS	metal-binding	11	1.0157	0.96253	PDE6B, PTGIS, PDLIM7, MICAL2, SYT2, C330005M16RIK, ATP1A1, ACLY, PPP3CA, CSRP1, CYB561	104	2362	15501	0.694127	1	0.999982	100
GOTERM_MF_FAT	GO:0046914~transition metal ion binding	8	0.738689	0.997879	PTGIS, PDLIM7, MICAL2, C330005M16RIK, PPP3CA, ASPH, CSRP1, CYB561	82	2263	11595	0.499876	1	1	100
Annotation Cluster 38	Enrichment Score: 0.12365857520560418
Category	Term	Count	%	PValue	Genes	List Total	Pop Hits	Pop Total	Fold Enrichment	Bonferroni	Benjamini	FDR
SP_PIR_KEYWORDS	Apoptosis	3	0.277008	0.604787	CADM1, DFFA, TNFRSF12A	104	305	15501	1.46605	1	0.977898	99.9991
GOTERM_BP_FAT	GO:0006915~apoptosis	3	0.277008	0.771728	CADM1, DFFA, TNFRSF12A	79	423	11876	1.06616	1	0.999976	100
GOTERM_BP_FAT	GO:0012501~programmed cell death	3	0.277008	0.778502	CADM1, DFFA, TNFRSF12A	79	429	11876	1.05125	1	0.999979	100
GOTERM_BP_FAT	GO:0008219~cell death	3	0.277008	0.80983	CADM1, DFFA, TNFRSF12A	79	459	11876	0.982543	1	0.999991	100
GOTERM_BP_FAT	GO:0016265~death	3	0.277008	0.81844	CADM1, DFFA, TNFRSF12A	79	468	11876	0.963648	1	0.999992	100
Annotation Cluster 39	Enrichment Score: 0.11243903120532757
Category	Term	Count	%	PValue	Genes	List Total	Pop Hits	Pop Total	Fold Enrichment	Bonferroni	Benjamini	FDR
SP_PIR_KEYWORDS	mitochondrion	5	0.461681	0.718911	COQ2, GLYAT, MRPS23, GCSH, MRPL55	104	728	15501	1.02368	1	0.992543	100
SP_PIR_KEYWORDS	transit peptide	3	0.277008	0.784859	COQ2, GCSH, MRPL55	104	431	15501	1.03746	1	0.995445	100
UP_SEQ_FEATURE	transit peptide:Mitochondrion	3	0.277008	0.81511	COQ2, GCSH, MRPL55	103	423	14102	0.971011	1	1	100
Annotation Cluster 40	Enrichment Score: 0.09415892287099381
Category	Term	Count	%	PValue	Genes	List Total	Pop Hits	Pop Total	Fold Enrichment	Bonferroni	Benjamini	FDR
GOTERM_BP_FAT	GO:0044265~cellular macromolecule catabolic process	4	0.369344	0.71292	DFFA, UCHL1, FBXO31, UBE2J2	79	555	11876	1.08345	1	0.999897	100
GOTERM_BP_FAT	GO:0009057~macromolecule catabolic process	4	0.369344	0.759579	DFFA, UCHL1, FBXO31, UBE2J2	79	598	11876	1.00555	1	0.999968	100
SP_PIR_KEYWORDS	ubl conjugation pathway	3	0.277008	0.785948	UCHL1, FBXO31, UBE2J2	104	432	15501	1.03506	1	0.995072	100
GOTERM_BP_FAT	GO:0019941~modification-dependent protein catabolic process	3	0.277008	0.810804	UCHL1, FBXO31, UBE2J2	79	460	11876	0.980407	1	0.999991	100
GOTERM_BP_FAT	GO:0043632~modification-dependent macromolecule catabolic process	3	0.277008	0.810804	UCHL1, FBXO31, UBE2J2	79	460	11876	0.980407	1	0.999991	100
GOTERM_BP_FAT	GO:0051603~proteolysis involved in cellular protein catabolic process	3	0.277008	0.832029	UCHL1, FBXO31, UBE2J2	79	483	11876	0.933721	1	0.999995	100
GOTERM_BP_FAT	GO:0044257~cellular protein catabolic process	3	0.277008	0.834636	UCHL1, FBXO31, UBE2J2	79	486	11876	0.927957	1	0.999995	100
GOTERM_BP_FAT	GO:0030163~protein catabolic process	3	0.277008	0.84874	UCHL1, FBXO31, UBE2J2	79	503	11876	0.896595	1	0.999997	100
GOTERM_BP_FAT	GO:0006508~proteolysis	5	0.461681	0.861629	SCPEP1, UCHL1, FBXO31, SCG5, UBE2J2	79	916	11876	0.820574	1	0.999998	100
Annotation Cluster 41	Enrichment Score: 0.01244065683475542
Category	Term	Count	%	PValue	Genes	List Total	Pop Hits	Pop Total	Fold Enrichment	Bonferroni	Benjamini	FDR
GOTERM_CC_FAT	GO:0005654~nucleoplasm	3	0.277008	0.942948	FOS, CCND1, PRKACA	90	552	10970	0.66244	1	0.999968	100
GOTERM_CC_FAT	GO:0070013~intracellular organelle lumen	5	0.461681	0.973174	FOS, CCND1, MRPS23, MRPL55, PRKACA	90	1032	10970	0.590547	1	0.999996	100
GOTERM_CC_FAT	GO:0043233~organelle lumen	5	0.461681	0.973665	FOS, CCND1, MRPS23, MRPL55, PRKACA	90	1035	10970	0.588835	1	0.999996	100
GOTERM_CC_FAT	GO:0031974~membrane-enclosed lumen	5	0.461681	0.97908	FOS, CCND1, MRPS23, MRPL55, PRKACA	90	1072	10970	0.568512	1	0.999997	100
GOTERM_CC_FAT	GO:0031981~nuclear lumen	3	0.277008	0.990582	FOS, CCND1, PRKACA	90	798	10970	0.458229	1	1	100
