# Supplementary material for: RNA-Seq Profiling of Spinal Cord Motor Neurons from a Presymptomatic SOD1 ALS Mouse
Source: PLoS One. 2013 Jan 3;8(1):e53575. doi: 10.1371/journal.pone.0053575 (PMC3536741; doi:10.1371/journal.pone.0053575)
Supplement: Table S4 — DAVID output for genes with reduced levels in G85R. Full DAVID output [S2,S3] for genes identified as having reduced levels in G85R from Table S2 (BHP ≤0.05 and/or raw p-value ≤0.05 and log2 fold change ≥2). (XLSX) [file pone.0053575.s009.xlsx]

## Sheet: Table_S4_G85R_Up_DAVID
Annotation Cluster 1	Enrichment Score: 5.176393275730983
Category	Term	Count	%	PValue	Genes	List Total	Pop Hits	Pop Total	Fold Enrichment	Bonferroni	Benjamini	FDR
SP_PIR_KEYWORDS	mitochondrion	31	16.6667	2.5101e-10	MRPS10, PINK1, CHCHD2, PRDX5, COX7A2L, IARS2, NDUFAF1, 1810035L17RIK, FIS1, NUDT9, NDUFS8, MTCH1, COX6B1, ATP5O, MRPL33, COX17, ATP5K, ATP5J, NDUFA4, NDUFA2, NDUFA3, NDUFA6, COX8A, NDUFC2, MRPS6, REEP1, NDUFA1, HAGH, 2010107E04RIK, HEBP2, ATPIF1	179	790	17854	3.91397	6.57645e-08	6.57645e-08	3.2849e-07
SP_PIR_KEYWORDS	transit peptide	14	7.52688	0.00068723	COX8A, CHCHD2, PRDX5, PINK1, IARS2, COX7A2L, NDUFAF1, 1810035L17RIK, HAGH, NUDT9, NDUFS8, ATP5O, ATPIF1, ATP5J	179	457	17854	3.05558	0.164827	0.0162409	0.895634
UP_SEQ_FEATURE	transit peptide:Mitochondrion	14	7.52688	0.00171407	COX8A, CHCHD2, PRDX5, PINK1, IARS2, COX7A2L, NDUFAF1, 1810035L17RIK, HAGH, NUDT9, NDUFS8, ATP5O, ATPIF1, ATP5J	181	449	16021	2.7599	0.577346	0.249538	2.44153
Annotation Cluster 2	Enrichment Score: 5.1480264784152645
Category	Term	Count	%	PValue	Genes	List Total	Pop Hits	Pop Total	Fold Enrichment	Bonferroni	Benjamini	FDR
KEGG_PATHWAY	mmu00190:Oxidative phosphorylation	17	9.13978	2.72371e-11	NDUFA4, NDUFA2, NDUFA3, ATP6AP1, NDUFA6, COX8A, NDUFC2, ATP6V1G2, COX7A2L, NDUFA1, ATP6V1E1, NDUFS8, COX6B1, ATP5O, COX17, ATP5K, ATP5J	84	130	5738	8.93278	2.45134e-09	2.45134e-09	2.96305e-08
SP_PIR_KEYWORDS	mitochondrion	31	16.6667	2.5101e-10	MRPS10, PINK1, CHCHD2, PRDX5, COX7A2L, IARS2, NDUFAF1, 1810035L17RIK, FIS1, NUDT9, NDUFS8, MTCH1, COX6B1, ATP5O, MRPL33, COX17, ATP5K, ATP5J, NDUFA4, NDUFA2, NDUFA3, NDUFA6, COX8A, NDUFC2, MRPS6, REEP1, NDUFA1, HAGH, 2010107E04RIK, HEBP2, ATPIF1	179	790	17854	3.91397	6.57645e-08	6.57645e-08	3.2849e-07
GOTERM_CC_FAT	GO:0005739~mitochondrion	44	23.6559	4.40001e-10	HSP90AB1, SNCB, AURKAIP1, ALDOC, MRPS10, CHCHD2, PRDX5, PINK1, HSPA1B, COX7A2L, IARS2, NDUFAF1, KCNJ11, FTH1, 1810035L17RIK, FIS1, NUDT9, MTCH1, NDUFS8, COX6B1, ATP5O, COX17, MRPL33, ATP5K, ATP5J, NDUFA4, NDUFA2, NDUFA3, PSAP, NDUFA6, LYRM5, COX8A, NDUFC2, MRPS6, REEP1, NDUFA1, DBI, HAGH, 2010107E04RIK, ATP6V1E1, HEBP2, CTSD, ATPIF1, CTSB	150	1322	12504	2.77446	1.1528e-07	1.1528e-07	5.75818e-07
GOTERM_BP_FAT	GO:0006091~generation of precursor metabolites and energy	17	9.13978	1.66167e-08	NDUFA4, NDUFA2, NDUFA3, ATP6AP1, ALDOC, NDUFA6, OGDHL, NDUFC2, NDUFA1, S100B, ATP6V1E1, NDUFS8, ENO2, ATP5O, GNAS, ATP5K, ATP5J	145	261	13588	6.10374	1.5038e-05	1.5038e-05	2.59198e-05
KEGG_PATHWAY	mmu05010:Alzheimer's disease	15	8.06452	2.46495e-07	NDUFA4, NDUFA2, NDUFA3, NDUFA6, COX8A, NDUFC2, COX7A2L, NDUFA1, ATP2A2, APOE, NDUFS8, COX6B1, CALM3, ATP5O, ATP5J	84	182	5738	5.62991	2.21843e-05	1.10922e-05	0.000268155
KEGG_PATHWAY	mmu05012:Parkinson's disease	13	6.98925	3.48354e-07	NDUFA4, NDUFA2, NDUFA3, NDUFA6, COX8A, NDUFC2, PINK1, COX7A2L, NDUFA1, NDUFS8, COX6B1, ATP5O, ATP5J	84	133	5738	6.67687	3.13514e-05	1.04506e-05	0.000378965
KEGG_PATHWAY	mmu05016:Huntington's disease	14	7.52688	1.72866e-06	NDUFA4, NDUFA2, CLTB, NDUFA3, AP2S1, NDUFA6, COX8A, NDUFC2, COX7A2L, NDUFA1, NDUFS8, COX6B1, ATP5O, ATP5J	84	183	5738	5.22587	0.000155567	3.8894e-05	0.00188054
SP_PIR_KEYWORDS	mitochondrion inner membrane	12	6.45161	2.2884e-06	NDUFA4, NDUFA2, NDUFA3, NDUFA6, MTCH1, COX8A, NDUFC2, ATP5O, COX7A2L, NDUFA1, ATP5K, ATP5J	179	183	17854	6.54053	0.000599383	0.000199834	0.00299473
GOTERM_CC_FAT	GO:0070469~respiratory chain	8	4.30108	1.15688e-05	NDUFA4, NDUFA2, NDUFA3, NDUFA6, NDUFS8, NDUFC2, COX7A2L, NDUFA1	150	65	12504	10.2597	0.00302646	0.00100984	0.0151387
GOTERM_CC_FAT	GO:0044429~mitochondrial part	20	10.7527	1.4619e-05	NDUFA4, NDUFA2, NDUFA3, NDUFA6, COX8A, NDUFC2, MRPS10, PINK1, HSPA1B, IARS2, COX7A2L, NDUFA1, HAGH, FIS1, MTCH1, COX6B1, ATP5O, COX17, ATP5K, ATP5J	150	524	12504	3.18168	0.00382287	0.000957091	0.0191298
SP_PIR_KEYWORDS	respiratory chain	7	3.76344	3.49289e-05	NDUFA4, NDUFA2, NDUFA3, NDUFA6, NDUFS8, NDUFC2, NDUFA1	179	62	17854	11.2613	0.00910978	0.00228527	0.0457009
GOTERM_CC_FAT	GO:0005740~mitochondrial envelope	16	8.60215	6.5709e-05	NDUFA4, NDUFA2, NDUFA3, NDUFA6, COX8A, NDUFC2, PINK1, COX7A2L, NDUFA1, FIS1, MTCH1, COX6B1, ATP5O, COX17, ATP5K, ATP5J	150	391	12504	3.41115	0.017069	0.00343734	0.0859575
GOTERM_CC_FAT	GO:0031966~mitochondrial membrane	15	8.06452	0.00012691	NDUFA4, NDUFA2, NDUFA3, NDUFA6, COX8A, NDUFC2, PINK1, COX7A2L, NDUFA1, FIS1, MTCH1, COX6B1, ATP5O, ATP5K, ATP5J	150	368	12504	3.39783	0.0327057	0.00552676	0.165956
GOTERM_CC_FAT	GO:0005743~mitochondrial inner membrane	13	6.98925	0.000218706	NDUFA4, NDUFA2, NDUFA3, NDUFA6, COX8A, NDUFC2, COX7A2L, NDUFA1, MTCH1, COX6B1, ATP5O, ATP5K, ATP5J	150	296	12504	3.66108	0.0556962	0.00713782	0.285837
GOTERM_CC_FAT	GO:0019866~organelle inner membrane	13	6.98925	0.000353725	NDUFA4, NDUFA2, NDUFA3, NDUFA6, COX8A, NDUFC2, COX7A2L, NDUFA1, MTCH1, COX6B1, ATP5O, ATP5K, ATP5J	150	312	12504	3.47333	0.088526	0.0102463	0.461922
SP_PIR_KEYWORDS	electron transport	7	3.76344	0.00049579	NDUFA4, NDUFA2, NDUFA3, NDUFA6, NDUFS8, NDUFC2, NDUFA1	179	100	17854	6.98201	0.121842	0.0143329	0.646887
GOTERM_CC_FAT	GO:0031967~organelle envelope	17	9.13978	0.000705443	NDUFA4, NDUFA2, NDUFA3, NDUFA6, COX8A, NDUFC2, PINK1, COX7A2L, NDUFA1, FIS1, CACYBP, MTCH1, COX6B1, ATP5O, COX17, ATP5K, ATP5J	150	540	12504	2.6243	0.168805	0.0183193	0.91927
GOTERM_CC_FAT	GO:0031975~envelope	17	9.13978	0.000733914	NDUFA4, NDUFA2, NDUFA3, NDUFA6, COX8A, NDUFC2, PINK1, COX7A2L, NDUFA1, FIS1, CACYBP, MTCH1, COX6B1, ATP5O, COX17, ATP5K, ATP5J	150	542	12504	2.61461	0.174987	0.0173349	0.956206
GOTERM_BP_FAT	GO:0022900~electron transport chain	7	3.76344	0.00121575	NDUFA4, NDUFA2, NDUFA3, NDUFA6, NDUFS8, NDUFC2, NDUFA1	145	112	13588	5.8569	0.667437	0.0301184	1.87967
GOTERM_CC_FAT	GO:0031090~organelle membrane	21	11.2903	0.00147257	NDUFA4, NDUFA2, NDUFA3, CLTB, AP2S1, NDUFA6, COX8A, NDUFC2, PINK1, ATP6V1G2, COX7A2L, NDUFA1, BCAP31, FIS1, SERINC1, MTCH1, COX6B1, ASPHD1, ATP5O, ATP5K, ATP5J	150	809	12504	2.16386	0.320296	0.0272016	1.91006
GOTERM_BP_FAT	GO:0055114~oxidation reduction	14	7.52688	0.0261915	NDUFA4, TM7SF2, NDUFA2, NDUFA3, NDUFA6, NDUFC2, PRDX5, NDUFA1, FTH1, AKR1A4, CYP39A1, NDUFS8, ASPHD1, DCXR	145	672	13588	1.9523	1	0.364405	33.8997
Annotation Cluster 3	Enrichment Score: 4.02399581231216
Category	Term	Count	%	PValue	Genes	List Total	Pop Hits	Pop Total	Fold Enrichment	Bonferroni	Benjamini	FDR
GOTERM_BP_FAT	GO:0030003~cellular cation homeostasis	12	6.45161	6.21786e-07	TFRC, S100B, ATP2A2, NDN, GNB1, APOE, MT2, ATP1A3, MT1, PRNP, FTH1, MT3	145	152	13588	7.39819	0.000562558	0.000281319	0.000969897
GOTERM_BP_FAT	GO:0019725~cellular homeostasis	16	8.60215	3.5528e-06	SEPW1, NDN, ATP1A3, PRDX5, FTH1, MBP, TFRC, S100B, ATP2A2, GNB1, APOE, MT2, MT1, SH3BGRL3, PRNP, MT3	145	343	13588	4.37133	0.00321013	0.00107119	0.00554174
GOTERM_BP_FAT	GO:0055080~cation homeostasis	12	6.45161	4.08128e-06	TFRC, S100B, ATP2A2, NDN, GNB1, APOE, MT2, ATP1A3, MT1, PRNP, FTH1, MT3	145	184	13588	6.11154	0.00368675	0.000922965	0.00636605
GOTERM_BP_FAT	GO:0030005~cellular di-, tri-valent inorganic cation homeostasis	10	5.37634	1.24509e-05	TFRC, S100B, ATP2A2, NDN, GNB1, APOE, MT2, MT1, PRNP, FTH1	145	134	13588	6.99331	0.0112049	0.0022511	0.01942
GOTERM_BP_FAT	GO:0006873~cellular ion homeostasis	13	6.98925	2.14783e-05	NDN, ATP1A3, FTH1, MBP, ATP2A2, S100B, TFRC, GNB1, APOE, MT2, MT1, PRNP, MT3	145	261	13588	4.66757	0.0192503	0.00323443	0.0334979
GOTERM_BP_FAT	GO:0055066~di-, tri-valent inorganic cation homeostasis	10	5.37634	2.47604e-05	TFRC, S100B, ATP2A2, NDN, GNB1, APOE, MT2, MT1, PRNP, FTH1	145	146	13588	6.41852	0.0221592	0.00319609	0.0386158
GOTERM_BP_FAT	GO:0055082~cellular chemical homeostasis	13	6.98925	2.78901e-05	NDN, ATP1A3, FTH1, MBP, ATP2A2, S100B, TFRC, GNB1, APOE, MT2, MT1, PRNP, MT3	145	268	13588	4.54565	0.024925	0.00315013	0.0434958
GOTERM_BP_FAT	GO:0050801~ion homeostasis	13	6.98925	6.63219e-05	NDN, ATP1A3, FTH1, MBP, ATP2A2, S100B, TFRC, GNB1, APOE, MT2, MT1, PRNP, MT3	145	293	13588	4.1578	0.0582574	0.00399356	0.103403
GOTERM_BP_FAT	GO:0042592~homeostatic process	17	9.13978	0.000462022	SEPW1, NDN, ATP1A3, PRDX5, HSPA1B, FTH1, MBP, TFRC, S100B, ATP2A2, GNB1, APOE, MT2, MT1, SH3BGRL3, PRNP, MT3	145	584	13588	2.72787	0.341787	0.0153705	0.718266
GOTERM_BP_FAT	GO:0048878~chemical homeostasis	13	6.98925	0.000506473	NDN, ATP1A3, FTH1, MBP, ATP2A2, S100B, TFRC, GNB1, APOE, MT2, MT1, PRNP, MT3	145	365	13588	3.33763	0.367752	0.0162407	0.787114
GOTERM_BP_FAT	GO:0006875~cellular metal ion homeostasis	7	3.76344	0.000671842	S100B, ATP2A2, NDN, GNB1, APOE, MT1, MT3	145	100	13588	6.55972	0.455682	0.0194288	1.04286
GOTERM_BP_FAT	GO:0055065~metal ion homeostasis	7	3.76344	0.000912925	S100B, ATP2A2, NDN, GNB1, APOE, MT1, MT3	145	106	13588	6.18842	0.562454	0.0240179	1.41459
GOTERM_BP_FAT	GO:0006874~cellular calcium ion homeostasis	5	2.68817	0.0158868	S100B, ATP2A2, NDN, GNB1, APOE	145	91	13588	5.14892	0.999999	0.256046	22.1046
GOTERM_BP_FAT	GO:0055074~calcium ion homeostasis	5	2.68817	0.0183243	S100B, ATP2A2, NDN, GNB1, APOE	145	95	13588	4.93212	1	0.28448	25.0602
Annotation Cluster 4	Enrichment Score: 3.4758100043654347
Category	Term	Count	%	PValue	Genes	List Total	Pop Hits	Pop Total	Fold Enrichment	Bonferroni	Benjamini	FDR
GOTERM_CC_FAT	GO:0042470~melanosome	9	4.83871	7.46633e-06	HSP90AB1, BSG, TFRC, PPIB, FLOT1, CTSD, ATP6V1G2, CTSB, HSPA8	150	85	12504	8.82635	0.00195427	0.000977614	0.00977055
GOTERM_CC_FAT	GO:0048770~pigment granule	9	4.83871	7.46633e-06	HSP90AB1, BSG, TFRC, PPIB, FLOT1, CTSD, ATP6V1G2, CTSB, HSPA8	150	85	12504	8.82635	0.00195427	0.000977614	0.00977055
GOTERM_CC_FAT	GO:0031410~cytoplasmic vesicle	16	8.60215	0.00107629	HSP90AB1, BSG, CLTB, NSG2, AP2S1, FLOT1, ATP6V1G2, RND2, SCGN, TFRC, PPIB, CTSD, TMSB4X, CTSB, HSPA8, MT3	150	508	12504	2.62551	0.245833	0.0232375	1.39939
GOTERM_CC_FAT	GO:0031982~vesicle	16	8.60215	0.00133254	HSP90AB1, BSG, CLTB, NSG2, AP2S1, FLOT1, ATP6V1G2, RND2, SCGN, TFRC, PPIB, CTSD, TMSB4X, CTSB, HSPA8, MT3	150	519	12504	2.56987	0.29486	0.0265159	1.72989
GOTERM_CC_FAT	GO:0016023~cytoplasmic membrane-bounded vesicle	13	6.98925	0.00394781	HSP90AB1, BSG, CLTB, AP2S1, FLOT1, ATP6V1G2, PPIB, TFRC, CTSD, TMSB4X, CTSB, HSPA8, MT3	150	414	12504	2.61758	0.645261	0.0559501	5.04492
GOTERM_CC_FAT	GO:0031988~membrane-bounded vesicle	13	6.98925	0.00442545	HSP90AB1, BSG, CLTB, AP2S1, FLOT1, ATP6V1G2, PPIB, TFRC, CTSD, TMSB4X, CTSB, HSPA8, MT3	150	420	12504	2.58019	0.687153	0.0593273	5.63908
Annotation Cluster 5	Enrichment Score: 3.0190696816455755
Category	Term	Count	%	PValue	Genes	List Total	Pop Hits	Pop Total	Fold Enrichment	Bonferroni	Benjamini	FDR
UP_SEQ_FEATURE	region of interest:Beta	3	1.6129	0.000373823	MT2, MT1, MT3	181	3	16021	88.5138	0.171132	0.171132	0.537274
UP_SEQ_FEATURE	region of interest:Alpha	3	1.6129	0.000373823	MT2, MT1, MT3	181	3	16021	88.5138	0.171132	0.171132	0.537274
INTERPRO	IPR018064:Metallothionein, vertebrate, metal binding site	3	1.6129	0.000545837	MT2, MT1, MT3	172	4	17763	77.4549	0.17934	0.0482108	0.747666
INTERPRO	IPR003019:Metallothionein superfamily, eukaryotic	3	1.6129	0.000545837	MT2, MT1, MT3	172	4	17763	77.4549	0.17934	0.0482108	0.747666
INTERPRO	IPR000006:Metallothionein, vertebrate	3	1.6129	0.000545837	MT2, MT1, MT3	172	4	17763	77.4549	0.17934	0.0482108	0.747666
SP_PIR_KEYWORDS	metal-thiolate cluster	3	1.6129	0.000585292	MT2, MT1, MT3	179	4	17854	74.8073	0.142206	0.0152221	0.763253
UP_SEQ_FEATURE	metal ion-binding site:Divalent metal cation; cluster A	3	1.6129	0.000742112	MT2, MT1, MT3	181	4	16021	66.3854	0.311113	0.170008	1.06397
UP_SEQ_FEATURE	metal ion-binding site:Divalent metal cation; cluster B	3	1.6129	0.000742112	MT2, MT1, MT3	181	4	16021	66.3854	0.311113	0.170008	1.06397
PIR_SUPERFAMILY	PIRSF002564:metallothionein	3	1.6129	0.00118683	MT2, MT1, MT3	117	4	8136	52.1538	0.145086	0.0753846	1.37713
GOTERM_BP_FAT	GO:0010035~response to inorganic substance	4	2.15054	0.0741454	MT2, MT1, PRNP, MT3	145	92	13588	4.07436	1	0.66357	69.9314
Annotation Cluster 6	Enrichment Score: 2.9422647912987836
Category	Term	Count	%	PValue	Genes	List Total	Pop Hits	Pop Total	Fold Enrichment	Bonferroni	Benjamini	FDR
SP_PIR_KEYWORDS	respiratory chain	7	3.76344	3.49289e-05	NDUFA4, NDUFA2, NDUFA3, NDUFA6, NDUFS8, NDUFC2, NDUFA1	179	62	17854	11.2613	0.00910978	0.00228527	0.0457009
SP_PIR_KEYWORDS	electron transport	7	3.76344	0.00049579	NDUFA4, NDUFA2, NDUFA3, NDUFA6, NDUFS8, NDUFC2, NDUFA1	179	100	17854	6.98201	0.121842	0.0143329	0.646887
GOTERM_BP_FAT	GO:0022900~electron transport chain	7	3.76344	0.00121575	NDUFA4, NDUFA2, NDUFA3, NDUFA6, NDUFS8, NDUFC2, NDUFA1	145	112	13588	5.8569	0.667437	0.0301184	1.87967
GOTERM_MF_FAT	GO:0050136~NADH dehydrogenase (quinone) activity	4	2.15054	0.00162883	NDUFA2, NDUFS8, NDUFC2, NDUFAF1	132	24	13288	16.7778	0.377727	0.0905137	2.14493
GOTERM_MF_FAT	GO:0008137~NADH dehydrogenase (ubiquinone) activity	4	2.15054	0.00162883	NDUFA2, NDUFS8, NDUFC2, NDUFAF1	132	24	13288	16.7778	0.377727	0.0905137	2.14493
GOTERM_MF_FAT	GO:0003954~NADH dehydrogenase activity	4	2.15054	0.00162883	NDUFA2, NDUFS8, NDUFC2, NDUFAF1	132	24	13288	16.7778	0.377727	0.0905137	2.14493
GOTERM_MF_FAT	GO:0016655~oxidoreductase activity, acting on NADH or NADPH, quinone or similar compound as acceptor	4	2.15054	0.00230374	NDUFA2, NDUFS8, NDUFC2, NDUFAF1	132	27	13288	14.9136	0.488886	0.0718608	3.02115
GOTERM_MF_FAT	GO:0016651~oxidoreductase activity, acting on NADH or NADPH	4	2.15054	0.0138194	NDUFA2, NDUFS8, NDUFC2, NDUFAF1	132	51	13288	7.89542	0.982569	0.236595	16.8973
Annotation Cluster 7	Enrichment Score: 2.894087264277357
Category	Term	Count	%	PValue	Genes	List Total	Pop Hits	Pop Total	Fold Enrichment	Bonferroni	Benjamini	FDR
GOTERM_MF_FAT	GO:0022890~inorganic cation transmembrane transporter activity	12	6.45161	4.72274e-08	TFRC, ATP2A2, ATP6AP1, ATP6V1E1, COX8A, COX6B1, ATP1A3, ATP6V1G2, ATP5O, COX7A2L, ATP5K, ATP5J	132	127	13288	9.51181	1.37431e-05	1.37431e-05	6.28168e-05
GOTERM_MF_FAT	GO:0015077~monovalent inorganic cation transmembrane transporter activity	10	5.37634	1.78836e-07	ATP6AP1, ATP6V1E1, COX8A, COX6B1, ATP1A3, ATP6V1G2, ATP5O, COX7A2L, ATP5K, ATP5J	132	87	13288	11.5709	5.20399e-05	2.60203e-05	0.000237868
GOTERM_MF_FAT	GO:0015078~hydrogen ion transmembrane transporter activity	9	4.83871	1.3913e-06	ATP6AP1, ATP6V1E1, COX8A, COX6B1, ATP6V1G2, ATP5O, COX7A2L, ATP5K, ATP5J	132	82	13288	11.0488	0.000404788	0.000134947	0.00185055
GOTERM_BP_FAT	GO:0009150~purine ribonucleotide metabolic process	9	4.83871	3.813e-05	ATP2A2, NUDT9, ATP6AP1, ATP6V1E1, ATP1A3, ATP5O, NME7, ATP5K, ATP5J	145	119	13588	7.08734	0.0339197	0.00382691	0.059461
GOTERM_BP_FAT	GO:0006163~purine nucleotide metabolic process	10	5.37634	5.09356e-05	ATP2A2, NUDT9, ATP6AP1, ATP6V1E1, ATP1A3, ATP5O, GUK1, NME7, ATP5K, ATP5J	145	160	13588	5.8569	0.0450515	0.00459918	0.079423
GOTERM_BP_FAT	GO:0009259~ribonucleotide metabolic process	9	4.83871	5.42176e-05	ATP2A2, NUDT9, ATP6AP1, ATP6V1E1, ATP1A3, ATP5O, NME7, ATP5K, ATP5J	145	125	13588	6.74714	0.0478838	0.00445081	0.0845385
GOTERM_BP_FAT	GO:0009201~ribonucleoside triphosphate biosynthetic process	8	4.30108	5.74609e-05	ATP2A2, ATP6AP1, ATP6V1E1, ATP1A3, ATP5O, NME7, ATP5K, ATP5J	145	93	13588	8.0611	0.0506746	0.00432426	0.0895936
GOTERM_BP_FAT	GO:0009206~purine ribonucleoside triphosphate biosynthetic process	8	4.30108	5.74609e-05	ATP2A2, ATP6AP1, ATP6V1E1, ATP1A3, ATP5O, NME7, ATP5K, ATP5J	145	93	13588	8.0611	0.0506746	0.00432426	0.0895936
GOTERM_BP_FAT	GO:0009145~purine nucleoside triphosphate biosynthetic process	8	4.30108	6.15404e-05	ATP2A2, ATP6AP1, ATP6V1E1, ATP1A3, ATP5O, NME7, ATP5K, ATP5J	145	94	13588	7.97535	0.0541731	0.00427512	0.0959515
GOTERM_BP_FAT	GO:0009142~nucleoside triphosphate biosynthetic process	8	4.30108	6.58537e-05	ATP2A2, ATP6AP1, ATP6V1E1, ATP1A3, ATP5O, NME7, ATP5K, ATP5J	145	95	13588	7.8914	0.0578583	0.00424806	0.102673
SP_PIR_KEYWORDS	Hydrogen ion transport	6	3.22581	8.23545e-05	ATP6AP1, ATP6V1E1, ATP6V1G2, ATP5O, ATP5K, ATP5J	179	45	17854	13.2991	0.0213466	0.00358984	0.107722
GOTERM_BP_FAT	GO:0009205~purine ribonucleoside triphosphate metabolic process	8	4.30108	9.72335e-05	ATP2A2, ATP6AP1, ATP6V1E1, ATP1A3, ATP5O, NME7, ATP5K, ATP5J	145	101	13588	7.4226	0.0842397	0.00548494	0.151563
GOTERM_BP_FAT	GO:0009199~ribonucleoside triphosphate metabolic process	8	4.30108	0.000103484	ATP2A2, ATP6AP1, ATP6V1E1, ATP1A3, ATP5O, NME7, ATP5K, ATP5J	145	102	13588	7.34983	0.089406	0.00549415	0.161299
GOTERM_BP_FAT	GO:0009144~purine nucleoside triphosphate metabolic process	8	4.30108	0.000131846	ATP2A2, ATP6AP1, ATP6V1E1, ATP1A3, ATP5O, NME7, ATP5K, ATP5J	145	106	13588	7.07248	0.112484	0.00660744	0.205464
GOTERM_CC_FAT	GO:0016469~proton-transporting two-sector ATPase complex	6	3.22581	0.000133948	ATP6AP1, ATP6V1E1, ATP6V1G2, ATP5O, ATP5K, ATP5J	150	42	12504	11.9086	0.0344879	0.00500126	0.175152
GOTERM_BP_FAT	GO:0009152~purine ribonucleotide biosynthetic process	8	4.30108	0.000139841	ATP2A2, ATP6AP1, ATP6V1E1, ATP1A3, ATP5O, NME7, ATP5K, ATP5J	145	107	13588	7.00638	0.118883	0.00663918	0.217911
GOTERM_BP_FAT	GO:0009260~ribonucleotide biosynthetic process	8	4.30108	0.000175852	ATP2A2, ATP6AP1, ATP6V1E1, ATP1A3, ATP5O, NME7, ATP5K, ATP5J	145	111	13588	6.7539	0.14714	0.00792644	0.273954
GOTERM_BP_FAT	GO:0015992~proton transport	6	3.22581	0.000217085	ATP6AP1, ATP6V1E1, ATP6V1G2, ATP5O, ATP5K, ATP5J	145	52	13588	10.8127	0.178385	0.0093127	0.338086
GOTERM_BP_FAT	GO:0009141~nucleoside triphosphate metabolic process	8	4.30108	0.000219023	ATP2A2, ATP6AP1, ATP6V1E1, ATP1A3, ATP5O, NME7, ATP5K, ATP5J	145	115	13588	6.51898	0.179825	0.00897033	0.341101
GOTERM_BP_FAT	GO:0006754~ATP biosynthetic process	7	3.76344	0.00023059	ATP2A2, ATP6AP1, ATP6V1E1, ATP1A3, ATP5O, ATP5K, ATP5J	145	82	13588	7.99966	0.188368	0.00903322	0.359084
GOTERM_BP_FAT	GO:0006818~hydrogen transport	6	3.22581	0.000237672	ATP6AP1, ATP6V1E1, ATP6V1G2, ATP5O, ATP5K, ATP5J	145	53	13588	10.6087	0.193555	0.00892324	0.370094
GOTERM_BP_FAT	GO:0006119~oxidative phosphorylation	6	3.22581	0.000308415	ATP6AP1, ATP6V1E1, NDUFC2, ATP5O, ATP5K, ATP5J	145	56	13588	10.0404	0.24358	0.0111042	0.480004
GOTERM_BP_FAT	GO:0046034~ATP metabolic process	7	3.76344	0.000382581	ATP2A2, ATP6AP1, ATP6V1E1, ATP1A3, ATP5O, ATP5K, ATP5J	145	90	13588	7.28858	0.292701	0.013231	0.595111
GOTERM_MF_FAT	GO:0042625~ATPase activity, coupled to transmembrane movement of ions	6	3.22581	0.000585021	ATP2A2, ATP6AP1, ATP6V1E1, ATP1A3, ATP6V1G2, ATP5O	132	69	13288	8.75362	0.15658	0.0416792	0.775339
GOTERM_BP_FAT	GO:0015986~ATP synthesis coupled proton transport	5	2.68817	0.000608862	ATP6AP1, ATP6V1E1, ATP5O, ATP5K, ATP5J	145	37	13588	12.6636	0.423735	0.018827	0.945532
GOTERM_BP_FAT	GO:0015985~energy coupled proton transport, down electrochemical gradient	5	2.68817	0.000608862	ATP6AP1, ATP6V1E1, ATP5O, ATP5K, ATP5J	145	37	13588	12.6636	0.423735	0.018827	0.945532
GOTERM_BP_FAT	GO:0006164~purine nucleotide biosynthetic process	8	4.30108	0.000633953	ATP2A2, ATP6AP1, ATP6V1E1, ATP1A3, ATP5O, NME7, ATP5K, ATP5J	145	137	13588	5.47214	0.436681	0.0189485	0.984317
GOTERM_BP_FAT	GO:0034220~ion transmembrane transport	5	2.68817	0.000990456	ATP6AP1, ATP6V1E1, ATP5O, ATP5K, ATP5J	145	42	13588	11.156	0.59213	0.0252976	1.53386
GOTERM_MF_FAT	GO:0019829~cation-transporting ATPase activity	4	2.15054	0.00183769	ATP2A2, ATP6AP1, ATP6V1E1, ATP5O	132	25	13288	16.1067	0.414483	0.0647184	2.41687
GOTERM_BP_FAT	GO:0009165~nucleotide biosynthetic process	8	4.30108	0.00252943	ATP2A2, ATP6AP1, ATP6V1E1, ATP1A3, ATP5O, NME7, ATP5K, ATP5J	145	174	13588	4.30852	0.89894	0.0570766	3.87355
GOTERM_MF_FAT	GO:0016820~hydrolase activity, acting on acid anhydrides, catalyzing transmembrane movement of substances	6	3.22581	0.00269468	ATP2A2, ATP6AP1, ATP6V1E1, ATP1A3, ATP6V1G2, ATP5O	132	97	13288	6.2268	0.543977	0.0755175	3.52538
GOTERM_MF_FAT	GO:0043492~ATPase activity, coupled to movement of substances	6	3.22581	0.00269468	ATP2A2, ATP6AP1, ATP6V1E1, ATP1A3, ATP6V1G2, ATP5O	132	97	13288	6.2268	0.543977	0.0755175	3.52538
GOTERM_MF_FAT	GO:0042626~ATPase activity, coupled to transmembrane movement of substances	6	3.22581	0.00269468	ATP2A2, ATP6AP1, ATP6V1E1, ATP1A3, ATP6V1G2, ATP5O	132	97	13288	6.2268	0.543977	0.0755175	3.52538
GOTERM_BP_FAT	GO:0034654~nucleobase, nucleoside, nucleotide and nucleic acid biosynthetic process	8	4.30108	0.00296296	ATP2A2, ATP6AP1, ATP6V1E1, ATP1A3, ATP5O, NME7, ATP5K, ATP5J	145	179	13588	4.18817	0.93181	0.0649325	4.52319
GOTERM_BP_FAT	GO:0034404~nucleobase, nucleoside and nucleotide biosynthetic process	8	4.30108	0.00296296	ATP2A2, ATP6AP1, ATP6V1E1, ATP1A3, ATP5O, NME7, ATP5K, ATP5J	145	179	13588	4.18817	0.93181	0.0649325	4.52319
GOTERM_BP_FAT	GO:0006812~cation transport	14	7.52688	0.00326034	SCN1B, FKBP4, ATP6AP1, ATP1A3, ATP6V1G2, KCNJ11, FTH1, ATP2A2, ATP6V1E1, SLC41A3, ATP5O, COX17, ATP5K, ATP5J	145	515	13588	2.54747	0.947944	0.0679487	4.96643
GOTERM_MF_FAT	GO:0015405~P-P-bond-hydrolysis-driven transmembrane transporter activity	6	3.22581	0.00411179	ATP2A2, ATP6AP1, ATP6V1E1, ATP1A3, ATP6V1G2, ATP5O	132	107	13288	5.64486	0.698504	0.0950869	5.33287
GOTERM_MF_FAT	GO:0015399~primary active transmembrane transporter activity	6	3.22581	0.00427796	ATP2A2, ATP6AP1, ATP6V1E1, ATP1A3, ATP6V1G2, ATP5O	132	108	13288	5.59259	0.712794	0.0915049	5.54275
GOTERM_BP_FAT	GO:0006811~ion transport	16	8.60215	0.00850827	GABRA2, SCN1B, FKBP4, ATP6AP1, ATP1A3, ATP6V1G2, KCNJ11, FTH1, FXYD7, ATP2A2, ATP6V1E1, SLC41A3, ATP5O, COX17, ATP5K, ATP5J	145	712	13588	2.10585	0.999562	0.157888	12.4785
GOTERM_MF_FAT	GO:0046961~proton-transporting ATPase activity, rotational mechanism	3	1.6129	0.00931154	ATP6AP1, ATP6V1E1, ATP5O	132	15	13288	20.1333	0.93428	0.176716	11.7002
GOTERM_BP_FAT	GO:0015672~monovalent inorganic cation transport	9	4.83871	0.0154175	SCN1B, ATP6AP1, ATP6V1E1, ATP1A3, ATP6V1G2, ATP5O, KCNJ11, ATP5K, ATP5J	145	303	13588	2.78348	0.999999	0.25394	21.5231
GOTERM_CC_FAT	GO:0033178~proton-transporting two-sector ATPase complex, catalytic domain	3	1.6129	0.0170606	ATP6AP1, ATP6V1E1, ATP5O	150	17	12504	14.7106	0.988984	0.171263	20.1639
GOTERM_MF_FAT	GO:0015662~ATPase activity, coupled to transmembrane movement of ions, phosphorylative mechanism	4	2.15054	0.0186085	ATP2A2, ATP6V1E1, ATP1A3, ATP6V1G2	132	57	13288	7.06433	0.995772	0.289389	22.1076
SP_PIR_KEYWORDS	ion transport	12	6.45161	0.0204514	GABRA2, SCN1B, ATP2A2, ATP6AP1, ATP6V1E1, ATP1A3, ATP6V1G2, ATP5O, KCNJ11, FXYD7, ATP5K, ATP5J	179	543	17854	2.20427	0.995545	0.227251	23.6939
GOTERM_CC_FAT	GO:0045259~proton-transporting ATP synthase complex	3	1.6129	0.0211211	ATP5O, ATP5K, ATP5J	150	19	12504	13.1621	0.996276	0.200461	24.3738
GOTERM_MF_FAT	GO:0042623~ATPase activity, coupled	7	3.76344	0.0230793	ATP2A2, ATP6AP1, ATP6V1E1, ATP1A3, ATP6V1G2, ATP5O, HSPA8	132	223	13288	3.15994	0.99888	0.300662	26.6974
GOTERM_BP_FAT	GO:0044271~nitrogen compound biosynthetic process	8	4.30108	0.0418545	ATP2A2, ATP6AP1, ATP6V1E1, ATP1A3, ATP5O, NME7, ATP5K, ATP5J	145	302	13588	2.48239	1	0.498906	48.6718
GOTERM_MF_FAT	GO:0016887~ATPase activity	7	3.76344	0.0595831	ATP2A2, ATP6AP1, ATP6V1E1, ATP1A3, ATP6V1G2, ATP5O, HSPA8	132	281	13288	2.50771	1	0.484233	55.829
UP_SEQ_FEATURE	metal ion-binding site:Magnesium	3	1.6129	0.322355	ATP2A2, ENO2, ATP1A3	181	103	16021	2.57807	1	0.999943	99.6327
SP_PIR_KEYWORDS	magnesium	6	3.22581	0.374668	ATP2A2, NUDT9, ENO2, ATP1A3, PINK1, NME7	179	403	17854	1.48501	1	0.926983	99.7853
GOTERM_MF_FAT	GO:0000287~magnesium ion binding	6	3.22581	0.377524	ATP2A2, NUDT9, ENO2, ATP1A3, PINK1, NME7	132	409	13288	1.47677	1	0.968213	99.8173
GOTERM_BP_FAT	GO:0016310~phosphorylation	9	4.83871	0.494119	HUNK, SPAG9, ATP6AP1, ATP6V1E1, NDUFC2, PINK1, ATP5O, ATP5K, ATP5J	145	718	13588	1.17464	1	0.99651	99.9976
GOTERM_BP_FAT	GO:0055085~transmembrane transport	6	3.22581	0.540817	SLC35B2, ATP6AP1, ATP6V1E1, ATP5O, ATP5K, ATP5J	145	460	13588	1.22231	1	0.997812	99.9995
GOTERM_BP_FAT	GO:0006793~phosphorus metabolic process	9	4.83871	0.705859	HUNK, SPAG9, ATP6AP1, ATP6V1E1, NDUFC2, PINK1, ATP5O, ATP5K, ATP5J	145	866	13588	0.973895	1	0.999726	100
GOTERM_BP_FAT	GO:0006796~phosphate metabolic process	9	4.83871	0.705859	HUNK, SPAG9, ATP6AP1, ATP6V1E1, NDUFC2, PINK1, ATP5O, ATP5K, ATP5J	145	866	13588	0.973895	1	0.999726	100
Annotation Cluster 8	Enrichment Score: 2.329532292975657
Category	Term	Count	%	PValue	Genes	List Total	Pop Hits	Pop Total	Fold Enrichment	Bonferroni	Benjamini	FDR
SP_PIR_KEYWORDS	Chaperone	9	4.83871	0.000131702	HSP90AB1, A730008H23RIK, DNAJC7, DNAJA1, HSPA1B, DNAJB1, COX17, NDUFAF1, HSPA8	179	150	17854	5.98458	0.0339195	0.0049176	0.172217
SP_PIR_KEYWORDS	stress response	4	2.15054	0.0101724	HSP90AB1, HSPA1B, DNAJB1, HSPA8	179	45	17854	8.86605	0.931356	0.131503	12.524
GOTERM_BP_FAT	GO:0006457~protein folding	6	3.22581	0.0112965	HSP90AB1, PPIB, FKBP4, DNAJA1, DNAJB1, HSPA8	145	127	13588	4.42726	0.999966	0.196482	16.2399
GOTERM_MF_FAT	GO:0051082~unfolded protein binding	4	2.15054	0.0317622	HSP90AB1, DNAJA1, DNAJB1, HSPA8	132	70	13288	5.75238	0.999917	0.313199	34.905
Annotation Cluster 9	Enrichment Score: 2.226801523221296
Category	Term	Count	%	PValue	Genes	List Total	Pop Hits	Pop Total	Fold Enrichment	Bonferroni	Benjamini	FDR
INTERPRO	IPR018316:Tubulin/FtsZ, 2-layer sandwich domain	5	2.68817	2.87083e-05	TUBB5, TUBA4A, TUBA1A, TUBA1B, TUBB4	172	19	17763	27.1772	0.0103387	0.0103387	0.0394532
INTERPRO	IPR003008:Tubulin/FtsZ, GTPase domain	5	2.68817	3.56165e-05	TUBB5, TUBA4A, TUBA1A, TUBA1B, TUBB4	172	20	17763	25.8183	0.0128106	0.00642596	0.0489449
INTERPRO	IPR000217:Tubulin	5	2.68817	3.56165e-05	TUBB5, TUBA4A, TUBA1A, TUBA1B, TUBB4	172	20	17763	25.8183	0.0128106	0.00642596	0.0489449
INTERPRO	IPR017975:Tubulin, conserved site	5	2.68817	7.58005e-05	TUBB5, TUBA4A, TUBA1A, TUBA1B, TUBB4	172	24	17763	21.5153	0.0270678	0.00910524	0.10414
PIR_SUPERFAMILY	PIRSF002306:tubulin	5	2.68817	0.000159344	TUBB5, TUBA4A, TUBA1A, TUBA1B, TUBB4	117	20	8136	17.3846	0.0208154	0.0208154	0.18591
GOTERM_BP_FAT	GO:0070271~protein complex biogenesis	10	5.37634	0.00069881	SPAG9, FKBP4, TUBB5, H2-D1, TUBA4A, ATPIF1, TUBA1A, PRNP, TUBA1B, TUBB4	145	227	13588	4.12821	0.468814	0.019576	1.08451
GOTERM_BP_FAT	GO:0006461~protein complex assembly	10	5.37634	0.00069881	SPAG9, FKBP4, TUBB5, H2-D1, TUBA4A, ATPIF1, TUBA1A, PRNP, TUBA1B, TUBB4	145	227	13588	4.12821	0.468814	0.019576	1.08451
GOTERM_BP_FAT	GO:0051258~protein polymerization	5	2.68817	0.000822054	TUBB5, TUBA4A, TUBA1A, TUBA1B, TUBB4	145	40	13588	11.7138	0.524916	0.022301	1.27463
GOTERM_MF_FAT	GO:0005198~structural molecule activity	13	6.98925	0.00163165	GFAP, CLTB, CRYAB, MRPS10, MRPS6, MBP, RPLP1, TUBB5, TUBA4A, TUBA1A, TUBA1B, MRPL33, TUBB4	132	450	13288	2.90815	0.378239	0.0761447	2.14861
GOTERM_MF_FAT	GO:0003924~GTPase activity	7	3.76344	0.00166381	GNB1, TUBB5, TUBA4A, GNAS, TUBA1A, TUBA1B, TUBB4	132	128	13288	5.50521	0.38404	0.0668831	2.19052
GOTERM_BP_FAT	GO:0043933~macromolecular complex subunit organization	12	6.45161	0.00182308	SPAG9, APOE, FKBP4, A730008H23RIK, TUBB5, H2-D1, TUBA4A, ATPIF1, TUBA1A, PRNP, TUBA1B, TUBB4	145	367	13588	3.0641	0.808218	0.0436509	2.80623
INTERPRO	IPR002452:Alpha tubulin	3	1.6129	0.00248339	TUBA4A, TUBA1A, TUBA1B	172	8	17763	38.7275	0.593472	0.164747	3.35999
GOTERM_BP_FAT	GO:0065003~macromolecular complex assembly	11	5.91398	0.00321146	SPAG9, FKBP4, A730008H23RIK, TUBB5, H2-D1, TUBA4A, ATPIF1, TUBA1A, PRNP, TUBA1B, TUBB4	145	338	13588	3.04974	0.945581	0.0685392	4.8937
GOTERM_BP_FAT	GO:0043623~cellular protein complex assembly	6	3.22581	0.00580568	FKBP4, TUBB5, TUBA4A, TUBA1A, TUBA1B, TUBB4	145	108	13588	5.20613	0.994854	0.115334	8.68222
SP_PIR_KEYWORDS	microtubule	8	4.30108	0.00679527	EML2, GABARAPL1, MTAP1A, TUBB5, TUBA4A, TUBA1A, TUBA1B, TUBB4	179	221	17854	3.61061	0.832444	0.105645	8.53661
GOTERM_CC_FAT	GO:0015630~microtubule cytoskeleton	13	6.98925	0.00755589	SNCG, GABARAPL1, NDN, DCTN3, EML2, MTAP1A, TUBB5, TUBA4A, CALM3, TRIP10, TUBA1A, TUBA1B, TUBB4	150	450	12504	2.40818	0.862916	0.0945815	9.44905
KEGG_PATHWAY	mmu04540:Gap junction	6	3.22581	0.00781891	TUBB5, TUBA4A, GNAS, TUBA1A, TUBA1B, TUBB4	84	86	5738	4.76578	0.506616	0.111077	8.18498
GOTERM_CC_FAT	GO:0005874~microtubule	9	4.83871	0.00804067	EML2, GABARAPL1, MTAP1A, TUBB5, TUBA4A, TUBA1A, TRIP10, TUBA1B, TUBB4	150	240	12504	3.126	0.879387	0.095816	10.0262
GOTERM_BP_FAT	GO:0051260~protein homooligomerization	4	2.15054	0.0185621	SPAG9, H2-D1, ATPIF1, PRNP	145	53	13588	7.07248	1	0.282858	25.3429
GOTERM_BP_FAT	GO:0007018~microtubule-based movement	5	2.68817	0.0223955	TUBB5, TUBA4A, TUBA1A, TUBA1B, TUBB4	145	101	13588	4.63913	1	0.32578	29.7641
GOTERM_MF_FAT	GO:0005525~GTP binding	9	4.83871	0.023933	RND2, GTPBP6, FKBP4, TUBB5, TUBA4A, GNAS, TUBA1A, TUBA1B, TUBB4	132	354	13288	2.55932	0.999132	0.297043	27.5449
GOTERM_MF_FAT	GO:0019001~guanyl nucleotide binding	9	4.83871	0.0272643	RND2, GTPBP6, FKBP4, TUBB5, TUBA4A, GNAS, TUBA1A, TUBA1B, TUBB4	132	363	13288	2.49587	0.999679	0.306247	30.7658
GOTERM_MF_FAT	GO:0032561~guanyl ribonucleotide binding	9	4.83871	0.0272643	RND2, GTPBP6, FKBP4, TUBB5, TUBA4A, GNAS, TUBA1A, TUBA1B, TUBB4	132	363	13288	2.49587	0.999679	0.306247	30.7658
GOTERM_BP_FAT	GO:0034622~cellular macromolecular complex assembly	7	3.76344	0.0280419	FKBP4, A730008H23RIK, TUBB5, TUBA4A, TUBA1A, TUBA1B, TUBB4	145	217	13588	3.02291	1	0.379156	35.832
UP_SEQ_FEATURE	nucleotide phosphate-binding region:GTP	8	4.30108	0.035347	RND2, GTPBP6, TUBB5, TUBA4A, GNAS, TUBA1A, TUBA1B, TUBB4	181	274	16021	2.58434	1	0.895459	40.4597
SP_PIR_KEYWORDS	gtp-binding	8	4.30108	0.0376843	RND2, GTPBP6, TUBB5, TUBA4A, GNAS, TUBA1A, TUBA1B, TUBB4	179	313	17854	2.54934	0.999957	0.342518	39.5103
GOTERM_BP_FAT	GO:0051259~protein oligomerization	4	2.15054	0.0409142	SPAG9, H2-D1, ATPIF1, PRNP	145	72	13588	5.20613	1	0.49711	47.8804
GOTERM_BP_FAT	GO:0034621~cellular macromolecular complex subunit organization	7	3.76344	0.0462482	FKBP4, A730008H23RIK, TUBB5, TUBA4A, TUBA1A, TUBA1B, TUBB4	145	245	13588	2.67744	1	0.528489	52.2229
GOTERM_BP_FAT	GO:0007017~microtubule-based process	6	3.22581	0.0738704	TUBB5, TUBA4A, TUBA1A, DCTN3, TUBA1B, TUBB4	145	211	13588	2.66475	1	0.667924	69.7918
GOTERM_CC_FAT	GO:0044430~cytoskeletal part	14	7.52688	0.132748	SNCG, GABARAPL1, GFAP, NDN, DCTN3, EML2, MTAP1A, TUBB5, TUBA4A, CALM3, TRIP10, TUBA1A, TUBA1B, TUBB4	150	774	12504	1.5078	1	0.625433	84.4931
GOTERM_CC_FAT	GO:0005856~cytoskeleton	17	9.13978	0.261661	ACTB, SNCG, GABARAPL1, GFAP, NDN, DCTN3, EML2, PFN1, MTAP1A, TUBB5, TUBA4A, CALM3, TMSB4X, TUBA1A, TRIP10, TUBA1B, TUBB4	150	1122	12504	1.26303	1	0.8425	98.1124
GOTERM_CC_FAT	GO:0043232~intracellular non-membrane-bounded organelle	25	13.4409	0.432537	SNCG, GFAP, NDN, A730008H23RIK, 1110036O03RIK, MRPS10, PFN1, RPLP1, TUBB5, TRIP10, TUBA1A, MRPL33, TUBA1B, CHD3, TUBB4, ACTB, GABARAPL1, MRPS6, DCTN3, EML2, MTAP1A, TUBA4A, CALM3, TMSB4X, DNAJB1	150	1919	12504	1.08598	1	0.926043	99.9398
GOTERM_CC_FAT	GO:0043228~non-membrane-bounded organelle	25	13.4409	0.432537	SNCG, GFAP, NDN, A730008H23RIK, 1110036O03RIK, MRPS10, PFN1, RPLP1, TUBB5, TRIP10, TUBA1A, MRPL33, TUBA1B, CHD3, TUBB4, ACTB, GABARAPL1, MRPS6, DCTN3, EML2, MTAP1A, TUBA4A, CALM3, TMSB4X, DNAJB1	150	1919	12504	1.08598	1	0.926043	99.9398
Annotation Cluster 10	Enrichment Score: 1.6545433564439933
Category	Term	Count	%	PValue	Genes	List Total	Pop Hits	Pop Total	Fold Enrichment	Bonferroni	Benjamini	FDR
GOTERM_MF_FAT	GO:0016676~oxidoreductase activity, acting on heme group of donors, oxygen as acceptor	3	1.6129	0.0213146	COX8A, COX6B1, COX7A2L	132	23	13288	13.1304	0.998107	0.294121	24.9165
GOTERM_MF_FAT	GO:0016675~oxidoreductase activity, acting on heme group of donors	3	1.6129	0.0213146	COX8A, COX6B1, COX7A2L	132	23	13288	13.1304	0.998107	0.294121	24.9165
GOTERM_MF_FAT	GO:0004129~cytochrome-c oxidase activity	3	1.6129	0.0213146	COX8A, COX6B1, COX7A2L	132	23	13288	13.1304	0.998107	0.294121	24.9165
GOTERM_MF_FAT	GO:0015002~heme-copper terminal oxidase activity	3	1.6129	0.0213146	COX8A, COX6B1, COX7A2L	132	23	13288	13.1304	0.998107	0.294121	24.9165
KEGG_PATHWAY	mmu04260:Cardiac muscle contraction	5	2.68817	0.0258568	ATP2A2, COX8A, COX6B1, ATP1A3, COX7A2L	84	78	5738	4.37882	0.905365	0.255257	24.7978
Annotation Cluster 11	Enrichment Score: 1.5801192223016973
Category	Term	Count	%	PValue	Genes	List Total	Pop Hits	Pop Total	Fold Enrichment	Bonferroni	Benjamini	FDR
GOTERM_BP_FAT	GO:0046688~response to copper ion	3	1.6129	0.00226193	MT2, MT1, PRNP	145	7	13588	40.1616	0.871184	0.0525023	3.47065
GOTERM_BP_FAT	GO:0010035~response to inorganic substance	4	2.15054	0.0741454	MT2, MT1, PRNP, MT3	145	92	13588	4.07436	1	0.66357	69.9314
GOTERM_BP_FAT	GO:0010038~response to metal ion	3	1.6129	0.108412	MT2, MT1, PRNP	145	53	13588	5.30436	1	0.773174	83.3034
Annotation Cluster 12	Enrichment Score: 1.4676350905677464
Category	Term	Count	%	PValue	Genes	List Total	Pop Hits	Pop Total	Fold Enrichment	Bonferroni	Benjamini	FDR
BIOCARTA	m_gcrPathway:Corticosteroids and cardioprotection	3	1.6129	0.0125124	GNB1, CALM3, GNAS	14	16	1171	15.683	0.473845	0.473845	11.4682
BIOCARTA	m_gpcrPathway:Signaling Pathway from G-Protein Families	3	1.6129	0.0295638	GNB1, CALM3, GNAS	14	25	1171	10.0371	0.783571	0.53478	25.197
GOTERM_BP_FAT	GO:0044093~positive regulation of molecular function	7	3.76344	0.106904	SPAG9, CARD9, GNB1, SERINC1, MTCH1, CALM3, GNAS	145	306	13588	2.1437	1	0.773022	82.8573
Annotation Cluster 13	Enrichment Score: 1.2643060856168298
Category	Term	Count	%	PValue	Genes	List Total	Pop Hits	Pop Total	Fold Enrichment	Bonferroni	Benjamini	FDR
GOTERM_MF_FAT	GO:0031072~heat shock protein binding	4	2.15054	0.0203843	FKBP4, DNAJC7, DNAJA1, DNAJB1	132	59	13288	6.82486	0.997504	0.297097	23.9616
SMART	SM00271:DnaJ	3	1.6129	0.03396	DNAJC7, DNAJA1, DNAJB1	52	52	9131	10.1305	0.839771	0.839771	28.6154
INTERPRO	IPR015609:Molecular chaperone, heat shock protein, Hsp40, DnaJ	3	1.6129	0.0591627	DNAJC7, DNAJA1, DNAJB1	172	41	17763	7.55658	1	0.95731	56.7537
INTERPRO	IPR018253:Heat shock protein DnaJ, conserved site	3	1.6129	0.0751649	DNAJC7, DNAJA1, DNAJB1	172	47	17763	6.59191	1	0.956845	65.838
INTERPRO	IPR001623:Heat shock protein DnaJ, N-terminal	3	1.6129	0.0894177	DNAJC7, DNAJA1, DNAJB1	172	52	17763	5.95807	1	0.966321	72.4051
UP_SEQ_FEATURE	domain:J	3	1.6129	0.0942787	DNAJC7, DNAJA1, DNAJB1	181	46	16021	5.77264	1	0.984117	75.992
Annotation Cluster 14	Enrichment Score: 1.2531048141904493
Category	Term	Count	%	PValue	Genes	List Total	Pop Hits	Pop Total	Fold Enrichment	Bonferroni	Benjamini	FDR
GOTERM_BP_FAT	GO:0008203~cholesterol metabolic process	5	2.68817	0.00645826	TM7SF2, CYP39A1, SAA1, APOE, PMVK	145	70	13588	6.6936	0.997159	0.124767	9.61272
GOTERM_BP_FAT	GO:0016125~sterol metabolic process	5	2.68817	0.00900645	TM7SF2, CYP39A1, SAA1, APOE, PMVK	145	77	13588	6.08509	0.999722	0.163053	13.1619
GOTERM_BP_FAT	GO:0008202~steroid metabolic process	5	2.68817	0.0919133	TM7SF2, CYP39A1, SAA1, APOE, PMVK	145	161	13588	2.91026	1	0.728102	77.7749
GOTERM_BP_FAT	GO:0006694~steroid biosynthetic process	3	1.6129	0.173504	TM7SF2, CYP39A1, PMVK	145	71	13588	3.95959	1	0.887297	94.8824
GOTERM_BP_FAT	GO:0008610~lipid biosynthetic process	4	2.15054	0.58495	TM7SF2, CYP39A1, SERINC1, PMVK	145	285	13588	1.31523	1	0.998822	99.9999
Annotation Cluster 15	Enrichment Score: 1.2148986607193308
Category	Term	Count	%	PValue	Genes	List Total	Pop Hits	Pop Total	Fold Enrichment	Bonferroni	Benjamini	FDR
UP_SEQ_FEATURE	repeat:4	6	3.22581	0.0056285	SNCG, SNCB, SPRR1A, APOE, MTAP1A, PRNP	181	101	16021	5.25825	0.941193	0.507555	7.81081
UP_SEQ_FEATURE	repeat:1	6	3.22581	0.0258744	SNCG, SNCB, SPRR1A, APOE, MTAP1A, PRNP	181	148	16021	3.5884	0.999998	0.888454	31.4577
UP_SEQ_FEATURE	repeat:2	6	3.22581	0.0278971	SNCG, SNCB, SPRR1A, APOE, MTAP1A, PRNP	181	151	16021	3.51711	0.999999	0.86854	33.48
UP_SEQ_FEATURE	repeat:5	4	2.15054	0.068731	SPRR1A, APOE, MTAP1A, PRNP	181	84	16021	4.21494	1	0.971973	64.1557
UP_SEQ_FEATURE	repeat:8	3	1.6129	0.138284	SPRR1A, APOE, MTAP1A	181	58	16021	4.5783	1	0.995188	88.2864
UP_SEQ_FEATURE	repeat:3	4	2.15054	0.150012	SPRR1A, APOE, MTAP1A, PRNP	181	119	16021	2.97525	1	0.995658	90.3851
UP_SEQ_FEATURE	repeat:7	3	1.6129	0.173642	SPRR1A, APOE, MTAP1A	181	67	16021	3.96331	1	0.997481	93.595
UP_SEQ_FEATURE	repeat:6	3	1.6129	0.189794	SPRR1A, APOE, MTAP1A	181	71	16021	3.74002	1	0.998001	95.1805
Annotation Cluster 16	Enrichment Score: 1.1101775446065156
Category	Term	Count	%	PValue	Genes	List Total	Pop Hits	Pop Total	Fold Enrichment	Bonferroni	Benjamini	FDR
SP_PIR_KEYWORDS	hdl	3	1.6129	0.0121833	SAA2, SAA1, APOE	179	17	17854	17.6017	0.959709	0.148352	14.8213
GOTERM_CC_FAT	GO:0034364~high-density lipoprotein particle	3	1.6129	0.0151708	SAA2, SAA1, APOE	150	16	12504	15.63	0.98178	0.159821	18.1317
GOTERM_CC_FAT	GO:0034358~plasma lipoprotein particle	3	1.6129	0.0407585	SAA2, SAA1, APOE	150	27	12504	9.26222	0.999982	0.332218	41.9909
GOTERM_CC_FAT	GO:0032994~protein-lipid complex	3	1.6129	0.0407585	SAA2, SAA1, APOE	150	27	12504	9.26222	0.999982	0.332218	41.9909
GOTERM_CC_FAT	GO:0044421~extracellular region part	8	4.30108	0.82304	LGALS3BP, NPY, SAA2, PSAP, SAA1, APOE, SPARCL1, SPARC	150	774	12504	0.861602	1	0.996309	100
GOTERM_CC_FAT	GO:0005615~extracellular space	5	2.68817	0.86358	NPY, SAA2, PSAP, SAA1, APOE	150	511	12504	0.815656	1	0.998279	100
Annotation Cluster 17	Enrichment Score: 1.0446285807468474
Category	Term	Count	%	PValue	Genes	List Total	Pop Hits	Pop Total	Fold Enrichment	Bonferroni	Benjamini	FDR
SP_PIR_KEYWORDS	protein degradation	3	1.6129	0.0014441	CTSL, CTSD, CTSB	179	6	17854	49.8715	0.315199	0.0310596	1.87344
GOTERM_CC_FAT	GO:0005773~vacuole	9	4.83871	0.00306354	CTSL, GABARAPL1, PSAP, ATP6AP1, MT1, CTSD, ATP6V1G2, CTSB, TRIP10	150	204	12504	3.67765	0.552411	0.0461864	3.93578
KEGG_PATHWAY	mmu04142:Lysosome	6	3.22581	0.0283834	CTSL, CLTB, PSAP, ATP6AP1, CTSD, CTSB	84	119	5738	3.44418	0.925089	0.250193	26.8927
SP_PIR_KEYWORDS	lysosome	5	2.68817	0.0561766	CTSL, PSAP, CTSD, CTSB, TRIP10	179	144	17854	3.4633	1	0.417831	53.0753
GOTERM_CC_FAT	GO:0005764~lysosome	6	3.22581	0.0617393	CTSL, PSAP, MT1, CTSD, CTSB, TRIP10	150	178	12504	2.80989	1	0.437714	56.5685
GOTERM_CC_FAT	GO:0000323~lytic vacuole	6	3.22581	0.0629319	CTSL, PSAP, MT1, CTSD, CTSB, TRIP10	150	179	12504	2.79419	1	0.43315	57.2854
UP_SEQ_FEATURE	propeptide:Activation peptide	3	1.6129	0.218494	CTSL, CTSD, CTSB	181	78	16021	3.40438	1	0.998517	97.1338
SP_PIR_KEYWORDS	zymogen	4	2.15054	0.323689	CTSL, PSMB6, CTSD, CTSB	179	199	17854	2.00488	1	0.907726	99.4013
GOTERM_MF_FAT	GO:0004175~endopeptidase activity	6	3.22581	0.401101	EML2, CTSL, PSMB6, CTSD, CTSB, ADAM22	132	421	13288	1.43468	1	0.971333	99.8907
GOTERM_MF_FAT	GO:0008233~peptidase activity	7	3.76344	0.591475	EML2, CTSL, PSMB6, SHFM1, CTSD, CTSB, ADAM22	132	629	13288	1.1203	1	0.996084	99.9993
GOTERM_MF_FAT	GO:0070011~peptidase activity, acting on L-amino acid peptides	6	3.22581	0.714932	EML2, CTSL, PSMB6, CTSD, CTSB, ADAM22	132	603	13288	1.00166	1	0.998529	100
SP_PIR_KEYWORDS	Protease	4	2.15054	0.886263	CTSL, PSMB6, CTSD, CTSB	179	509	17854	0.783835	1	0.999633	100
Annotation Cluster 18	Enrichment Score: 0.8313528852566834
Category	Term	Count	%	PValue	Genes	List Total	Pop Hits	Pop Total	Fold Enrichment	Bonferroni	Benjamini	FDR
GOTERM_BP_FAT	GO:0016052~carbohydrate catabolic process	4	2.15054	0.0546975	AKR1A4, ALDOC, OGDHL, ENO2	145	81	13588	4.62767	1	0.571918	58.4149
GOTERM_BP_FAT	GO:0006096~glycolysis	3	1.6129	0.0790631	ALDOC, OGDHL, ENO2	145	44	13588	6.38934	1	0.682335	72.3284
UP_SEQ_FEATURE	binding site:Substrate	7	3.76344	0.0902945	AKR1A4, ASPA, ALDOC, ENO2, PMVK, PHPT1, DCXR	181	275	16021	2.25308	1	0.986684	74.4246
GOTERM_BP_FAT	GO:0019320~hexose catabolic process	3	1.6129	0.105022	ALDOC, OGDHL, ENO2	145	52	13588	5.40637	1	0.771608	82.285
GOTERM_BP_FAT	GO:0006007~glucose catabolic process	3	1.6129	0.105022	ALDOC, OGDHL, ENO2	145	52	13588	5.40637	1	0.771608	82.285
GOTERM_BP_FAT	GO:0046365~monosaccharide catabolic process	3	1.6129	0.111832	ALDOC, OGDHL, ENO2	145	54	13588	5.20613	1	0.779456	84.2748
GOTERM_BP_FAT	GO:0044275~cellular carbohydrate catabolic process	3	1.6129	0.132903	ALDOC, OGDHL, ENO2	145	60	13588	4.68552	1	0.829309	89.1871
GOTERM_BP_FAT	GO:0005996~monosaccharide metabolic process	5	2.68817	0.145022	AKR1A4, ALDOC, OGDHL, ENO2, DCXR	145	191	13588	2.45315	1	0.849019	91.3186
GOTERM_BP_FAT	GO:0046164~alcohol catabolic process	3	1.6129	0.151088	ALDOC, OGDHL, ENO2	145	65	13588	4.32509	1	0.857798	92.2312
GOTERM_BP_FAT	GO:0006006~glucose metabolic process	4	2.15054	0.185677	ALDOC, OGDHL, ENO2, DCXR	145	140	13588	2.67744	1	0.902076	95.9398
KEGG_PATHWAY	mmu00010:Glycolysis / Gluconeogenesis	3	1.6129	0.258091	AKR1A4, ALDOC, ENO2	84	68	5738	3.01366	1	0.913058	96.1134
GOTERM_BP_FAT	GO:0019318~hexose metabolic process	4	2.15054	0.266292	ALDOC, OGDHL, ENO2, DCXR	145	169	13588	2.218	1	0.961553	99.2014
UP_SEQ_FEATURE	active site:Proton acceptor	6	3.22581	0.870159	HUNK, ALDOC, ENO2, PINK1, PHPT1, DCXR	181	662	16021	0.80224	1	1	100
Annotation Cluster 19	Enrichment Score: 0.8213965996826488
Category	Term	Count	%	PValue	Genes	List Total	Pop Hits	Pop Total	Fold Enrichment	Bonferroni	Benjamini	FDR
SP_PIR_KEYWORDS	EF hand	4	2.15054	0.00265725	S100B, S100A10, CALM3, SPARC	179	28	17854	14.249	0.501986	0.0522126	3.42217
INTERPRO	IPR011992:EF-Hand type	6	3.22581	0.068348	SCGN, S100B, SPARCL1, S100A10, CALM3, SPARC	172	227	17763	2.72969	1	0.959381	62.2095
SP_PIR_KEYWORDS	calcium binding	3	1.6129	0.0798329	S100B, S100A10, SPARC	179	47	17854	6.36658	1	0.504989	66.3386
INTERPRO	IPR018249:EF-HAND 2	5	2.68817	0.135996	SCGN, S100B, SPARCL1, S100A10, CALM3	172	205	17763	2.51886	1	0.991857	86.5913
INTERPRO	IPR018247:EF-HAND 1	5	2.68817	0.146598	SCGN, S100B, SPARCL1, CALM3, SPARC	172	211	17763	2.44723	1	0.991622	88.6841
INTERPRO	IPR018248:EF hand	3	1.6129	0.363587	SCGN, S100B, CALM3	172	132	17763	2.34712	1	0.999964	99.7994
SP_PIR_KEYWORDS	calcium	9	4.83871	0.445166	SCGN, CLTB, S100B, ATP2A2, PCP4, SPARCL1, CALM3, TKT, SPARC	179	731	17854	1.22803	1	0.95714	99.9551
GOTERM_MF_FAT	GO:0005509~calcium ion binding	10	5.37634	0.448037	SCGN, CLTB, S100B, ATP2A2, PCP4, SPARCL1, S100A10, CALM3, TKT, SPARC	132	840	13288	1.19841	1	0.982078	99.9631
UP_SEQ_FEATURE	domain:EF-hand 2	3	1.6129	0.537324	SCGN, S100B, CALM3	181	160	16021	1.65963	1	1	99.9985
UP_SEQ_FEATURE	domain:EF-hand 1	3	1.6129	0.54245	SCGN, S100B, CALM3	181	161	16021	1.64933	1	1	99.9987
Annotation Cluster 20	Enrichment Score: 0.8013847636382102
Category	Term	Count	%	PValue	Genes	List Total	Pop Hits	Pop Total	Fold Enrichment	Bonferroni	Benjamini	FDR
UP_SEQ_FEATURE	cross-link:Glycyl lysine isopeptide (Lys-Gly) (interchain with G-Cter in ubiquitin)	7	3.76344	0.0118381	PFN1, HUNK, ATP2A2, TUBB5, CALM3, GNAS, TUBA1B	181	168	16021	3.68808	0.997467	0.697489	15.7673
SP_PIR_KEYWORDS	isopeptide bond	7	3.76344	0.0594559	PFN1, HUNK, ATP2A2, TUBB5, CALM3, GNAS, TUBA1B	179	277	17854	2.52058	1	0.425229	55.1647
SP_PIR_KEYWORDS	ubl conjugation	8	4.30108	0.268867	PFN1, HUNK, ATP2A2, TUBB5, CALM3, GNAS, ANAPC11, TUBA1B	179	524	17854	1.52279	1	0.864823	98.3398
GOTERM_BP_FAT	GO:0007010~cytoskeleton organization	4	2.15054	0.675495	PFN1, TUBB5, TMSB4X, TUBA1B	145	326	13588	1.14982	1	0.99965	100
KEGG_PATHWAY	mmu04020:Calcium signaling pathway	3	1.6129	0.769907	ATP2A2, CALM3, GNAS	84	191	5738	1.07292	1	0.999581	100
Annotation Cluster 21	Enrichment Score: 0.7766178492964695
Category	Term	Count	%	PValue	Genes	List Total	Pop Hits	Pop Total	Fold Enrichment	Bonferroni	Benjamini	FDR
GOTERM_CC_FAT	GO:0000267~cell fraction	12	6.45161	0.0993763	ACTB, PLD3, GFAP, CYP39A1, ATP2A2, SNCB, CRYAB, GNAS, CTSB, KCNJ11, ITM2C, SNAP25	150	596	12504	1.67839	1	0.564386	74.5832
GOTERM_CC_FAT	GO:0005626~insoluble fraction	10	5.37634	0.178903	PLD3, GFAP, CYP39A1, ATP2A2, SNCB, CRYAB, GNAS, KCNJ11, ITM2C, SNAP25	150	528	12504	1.57879	1	0.725031	92.4194
GOTERM_CC_FAT	GO:0005624~membrane fraction	9	4.83871	0.263176	PLD3, GFAP, CYP39A1, ATP2A2, SNCB, GNAS, KCNJ11, ITM2C, SNAP25	150	510	12504	1.47106	1	0.83774	98.1625
Annotation Cluster 22	Enrichment Score: 0.7538884308698225
Category	Term	Count	%	PValue	Genes	List Total	Pop Hits	Pop Total	Fold Enrichment	Bonferroni	Benjamini	FDR
GOTERM_MF_FAT	GO:0032553~ribonucleotide binding	26	13.9785	0.0452115	HSP90AB1, ATP6AP1, FKBP4, PINK1, IARS2, HSPA1B, PMVK, ITM2C, KCNJ11, TUBB5, TUBA1A, TUBA1B, HSPA8, CHD3, TUBB4, ACTB, GTPBP6, ATP1A3, NME7, RND2, HUNK, ATP2A2, UBE2M, TUBA4A, GNAS, GUK1	132	1796	13288	1.45731	0.999999	0.40418	45.9561
GOTERM_MF_FAT	GO:0032555~purine ribonucleotide binding	26	13.9785	0.0452115	HSP90AB1, ATP6AP1, FKBP4, PINK1, IARS2, HSPA1B, PMVK, ITM2C, KCNJ11, TUBB5, TUBA1A, TUBA1B, HSPA8, CHD3, TUBB4, ACTB, GTPBP6, ATP1A3, NME7, RND2, HUNK, ATP2A2, UBE2M, TUBA4A, GNAS, GUK1	132	1796	13288	1.45731	0.999999	0.40418	45.9561
GOTERM_MF_FAT	GO:0017076~purine nucleotide binding	26	13.9785	0.0673818	HSP90AB1, ATP6AP1, FKBP4, PINK1, IARS2, HSPA1B, PMVK, ITM2C, KCNJ11, TUBB5, TUBA1A, TUBA1B, HSPA8, CHD3, TUBB4, ACTB, GTPBP6, ATP1A3, NME7, RND2, HUNK, ATP2A2, UBE2M, TUBA4A, GNAS, GUK1	132	1871	13288	1.3989	1	0.515675	60.4603
SP_PIR_KEYWORDS	nucleotide-binding	22	11.828	0.134981	ACTB, HSP90AB1, GTPBP6, ATP6AP1, ATP1A3, PINK1, HSPA1B, IARS2, PMVK, NME7, RND2, HUNK, ATP2A2, UBE2M, TUBB5, TUBA4A, GNAS, TUBA1A, GUK1, TUBA1B, HSPA8, TUBB4	179	1631	17854	1.3454	1	0.683756	85.0076
GOTERM_MF_FAT	GO:0000166~nucleotide binding	27	14.5161	0.171949	HSP90AB1, ATP6AP1, FKBP4, PINK1, IARS2, HSPA1B, PMVK, ITM2C, KCNJ11, 1810035L17RIK, TUBB5, TUBA1A, TUBA1B, HSPA8, CHD3, TUBB4, ACTB, GTPBP6, ATP1A3, NME7, RND2, HUNK, ATP2A2, UBE2M, TUBA4A, GNAS, GUK1	132	2183	13288	1.24508	1	0.849428	91.8702
GOTERM_MF_FAT	GO:0005524~ATP binding	18	9.67742	0.253647	ACTB, HSP90AB1, FKBP4, ATP6AP1, ATP1A3, PINK1, HSPA1B, IARS2, PMVK, KCNJ11, ITM2C, NME7, HUNK, ATP2A2, UBE2M, GUK1, HSPA8, CHD3	132	1443	13288	1.25572	1	0.930083	97.9581
GOTERM_MF_FAT	GO:0032559~adenyl ribonucleotide binding	18	9.67742	0.269395	ACTB, HSP90AB1, FKBP4, ATP6AP1, ATP1A3, PINK1, HSPA1B, IARS2, PMVK, KCNJ11, ITM2C, NME7, HUNK, ATP2A2, UBE2M, GUK1, HSPA8, CHD3	132	1460	13288	1.2411	1	0.937205	98.4624
GOTERM_MF_FAT	GO:0030554~adenyl nucleotide binding	18	9.67742	0.342749	ACTB, HSP90AB1, FKBP4, ATP6AP1, ATP1A3, PINK1, HSPA1B, IARS2, PMVK, KCNJ11, ITM2C, NME7, HUNK, ATP2A2, UBE2M, GUK1, HSPA8, CHD3	132	1535	13288	1.18046	1	0.966375	99.6236
GOTERM_MF_FAT	GO:0001883~purine nucleoside binding	18	9.67742	0.35597	ACTB, HSP90AB1, FKBP4, ATP6AP1, ATP1A3, PINK1, HSPA1B, IARS2, PMVK, KCNJ11, ITM2C, NME7, HUNK, ATP2A2, UBE2M, GUK1, HSPA8, CHD3	132	1548	13288	1.17054	1	0.965595	99.7127
GOTERM_MF_FAT	GO:0001882~nucleoside binding	18	9.67742	0.366215	ACTB, HSP90AB1, FKBP4, ATP6AP1, ATP1A3, PINK1, HSPA1B, IARS2, PMVK, KCNJ11, ITM2C, NME7, HUNK, ATP2A2, UBE2M, GUK1, HSPA8, CHD3	132	1558	13288	1.16303	1	0.96672	99.7679
SP_PIR_KEYWORDS	atp-binding	14	7.52688	0.522119	ACTB, HSP90AB1, ATP6AP1, ATP1A3, PINK1, IARS2, HSPA1B, PMVK, NME7, HUNK, ATP2A2, UBE2M, GUK1, HSPA8	179	1287	17854	1.08501	1	0.974013	99.9936
Annotation Cluster 23	Enrichment Score: 0.7394653430169716
Category	Term	Count	%	PValue	Genes	List Total	Pop Hits	Pop Total	Fold Enrichment	Bonferroni	Benjamini	FDR
GOTERM_CC_FAT	GO:0030665~clathrin coated vesicle membrane	3	1.6129	0.0682881	CLTB, AP2S1, ATP6V1G2	150	36	12504	6.94667	1	0.449977	60.3725
GOTERM_CC_FAT	GO:0044433~cytoplasmic vesicle part	4	2.15054	0.104345	CLTB, AP2S1, ATP6V1G2, TMSB4X	150	95	12504	3.50989	1	0.572237	76.3582
GOTERM_CC_FAT	GO:0030136~clathrin-coated vesicle	4	2.15054	0.127401	CLTB, AP2S1, ATP6V1G2, MT3	150	104	12504	3.20615	1	0.629094	83.1942
GOTERM_CC_FAT	GO:0030662~coated vesicle membrane	3	1.6129	0.131375	CLTB, AP2S1, ATP6V1G2	150	53	12504	4.71849	1	0.631137	84.1689
GOTERM_CC_FAT	GO:0030135~coated vesicle	4	2.15054	0.184098	CLTB, AP2S1, ATP6V1G2, MT3	150	124	12504	2.68903	1	0.718946	93.0236
GOTERM_CC_FAT	GO:0030659~cytoplasmic vesicle membrane	3	1.6129	0.27785	CLTB, AP2S1, ATP6V1G2	150	87	12504	2.87448	1	0.8434	98.5878
GOTERM_CC_FAT	GO:0012506~vesicle membrane	3	1.6129	0.321909	CLTB, AP2S1, ATP6V1G2	150	97	12504	2.57814	1	0.874713	99.3804
GOTERM_CC_FAT	GO:0012505~endomembrane system	7	3.76344	0.618279	CLTB, SERINC1, AP2S1, CACYBP, ASPHD1, ATP6V1G2, BCAP31	150	535	12504	1.09069	1	0.974186	99.9997
Annotation Cluster 24	Enrichment Score: 0.6845075302532468
Category	Term	Count	%	PValue	Genes	List Total	Pop Hits	Pop Total	Fold Enrichment	Bonferroni	Benjamini	FDR
GOTERM_CC_FAT	GO:0043025~cell soma	6	3.22581	0.0129591	SNCG, CPLX1, S100B, ENO2, TUBB4, MBP	150	117	12504	4.27487	0.967205	0.143876	15.6926
GOTERM_CC_FAT	GO:0030424~axon	3	1.6129	0.365296	SNCG, TUBB4, MBP	150	107	12504	2.3372	1	0.894311	99.7392
GOTERM_CC_FAT	GO:0043005~neuron projection	4	2.15054	0.561874	SNCG, CPLX1, TUBB4, MBP	150	245	12504	1.36098	1	0.965897	99.998
GOTERM_CC_FAT	GO:0042995~cell projection	7	3.76344	0.687244	SNCG, CPLX1, GNB1, GNAS, DCXR, TUBB4, MBP	150	575	12504	1.01482	1	0.982758	100
Annotation Cluster 25	Enrichment Score: 0.6384494831393964
Category	Term	Count	%	PValue	Genes	List Total	Pop Hits	Pop Total	Fold Enrichment	Bonferroni	Benjamini	FDR
INTERPRO	IPR011990:Tetratricopeptide-like helical	5	2.68817	0.0573167	FIS1, FKBP4, DNAJC7, STIP1, NAPB	172	150	17763	3.44244	1	0.971594	55.5727
SMART	SM00028:TPR	3	1.6129	0.129241	FKBP4, DNAJC7, STIP1	52	112	9131	4.70347	0.999347	0.974456	74.0812
SP_PIR_KEYWORDS	tpr repeat	4	2.15054	0.16658	FIS1, FKBP4, DNAJC7, STIP1	179	141	17854	2.82959	1	0.754424	90.7878
INTERPRO	IPR001440:Tetratricopeptide TPR-1	3	1.6129	0.232593	FKBP4, DNAJC7, STIP1	172	95	17763	3.26126	1	0.999371	97.3719
INTERPRO	IPR019734:Tetratricopeptide repeat	3	1.6129	0.293195	FKBP4, DNAJC7, STIP1	172	112	17763	2.76625	1	0.999873	99.1517
INTERPRO	IPR013026:Tetratricopeptide region	3	1.6129	0.30031	FKBP4, DNAJC7, STIP1	172	114	17763	2.71772	1	0.999819	99.2618
UP_SEQ_FEATURE	repeat:TPR 3	3	1.6129	0.383334	FKBP4, DNAJC7, STIP1	181	118	16021	2.25035	1	0.99999	99.9056
UP_SEQ_FEATURE	repeat:TPR 2	3	1.6129	0.430402	FKBP4, DNAJC7, STIP1	181	130	16021	2.04263	1	0.999995	99.9699
UP_SEQ_FEATURE	repeat:TPR 1	3	1.6129	0.430402	FKBP4, DNAJC7, STIP1	181	130	16021	2.04263	1	0.999995	99.9699
Annotation Cluster 26	Enrichment Score: 0.5849601014004415
Category	Term	Count	%	PValue	Genes	List Total	Pop Hits	Pop Total	Fold Enrichment	Bonferroni	Benjamini	FDR
GOTERM_BP_FAT	GO:0051494~negative regulation of cytoskeleton organization	3	1.6129	0.0917691	PFN1, MTAP1A, TMSB4X	145	48	13588	5.8569	1	0.732833	77.7198
GOTERM_BP_FAT	GO:0010639~negative regulation of organelle organization	3	1.6129	0.140116	PFN1, MTAP1A, TMSB4X	145	62	13588	4.53437	1	0.842159	90.5081
GOTERM_MF_FAT	GO:0008092~cytoskeletal protein binding	7	3.76344	0.224614	PFN1, SPAG9, GABARAPL1, S100B, NDN, MTAP1A, TMSB4X	132	414	13288	1.70209	1	0.908189	96.6078
GOTERM_BP_FAT	GO:0051129~negative regulation of cellular component organization	3	1.6129	0.25887	PFN1, MTAP1A, TMSB4X	145	93	13588	3.02291	1	0.958813	99.0656
GOTERM_BP_FAT	GO:0051493~regulation of cytoskeleton organization	3	1.6129	0.282463	PFN1, MTAP1A, TMSB4X	145	99	13588	2.83971	1	0.967078	99.4359
GOTERM_BP_FAT	GO:0033043~regulation of organelle organization	3	1.6129	0.487891	PFN1, MTAP1A, TMSB4X	145	154	13588	1.82553	1	0.996331	99.9971
GOTERM_MF_FAT	GO:0003779~actin binding	3	1.6129	0.780357	PFN1, MTAP1A, TMSB4X	132	288	13288	1.04861	1	0.999502	100
Annotation Cluster 27	Enrichment Score: 0.5036538842119085
Category	Term	Count	%	PValue	Genes	List Total	Pop Hits	Pop Total	Fold Enrichment	Bonferroni	Benjamini	FDR
SP_PIR_KEYWORDS	peroxisome	3	1.6129	0.248327	FIS1, PRDX5, PMVK	179	96	17854	3.11697	1	0.85305	97.6142
GOTERM_CC_FAT	GO:0042579~microbody	3	1.6129	0.352377	FIS1, PRDX5, PMVK	150	104	12504	2.40462	1	0.887965	99.6605
GOTERM_CC_FAT	GO:0005777~peroxisome	3	1.6129	0.352377	FIS1, PRDX5, PMVK	150	104	12504	2.40462	1	0.887965	99.6605
Annotation Cluster 28	Enrichment Score: 0.49089106275020084
Category	Term	Count	%	PValue	Genes	List Total	Pop Hits	Pop Total	Fold Enrichment	Bonferroni	Benjamini	FDR
GOTERM_BP_FAT	GO:0050804~regulation of synaptic transmission	3	1.6129	0.286392	SNCG, S100B, PINK1	145	100	13588	2.81131	1	0.967648	99.4822
GOTERM_BP_FAT	GO:0051969~regulation of transmission of nerve impulse	3	1.6129	0.313813	SNCG, S100B, PINK1	145	107	13588	2.62739	1	0.975391	99.719
GOTERM_BP_FAT	GO:0031644~regulation of neurological system process	3	1.6129	0.33714	SNCG, S100B, PINK1	145	113	13588	2.48789	1	0.980102	99.8362
GOTERM_BP_FAT	GO:0044057~regulation of system process	4	2.15054	0.358916	SNCG, S100B, ATP2A2, PINK1	145	201	13588	1.86488	1	0.984204	99.9027
Annotation Cluster 29	Enrichment Score: 0.46728987851780207
Category	Term	Count	%	PValue	Genes	List Total	Pop Hits	Pop Total	Fold Enrichment	Bonferroni	Benjamini	FDR
GOTERM_MF_FAT	GO:0003735~structural constituent of ribosome	4	2.15054	0.186916	RPLP1, MRPS10, MRPS6, MRPL33	132	151	13288	2.66667	1	0.865627	93.6216
GOTERM_BP_FAT	GO:0006412~translation	6	3.22581	0.250202	EIF3F, RPLP1, MRPS10, MRPS6, IARS2, MRPL33	145	319	13588	1.76258	1	0.955056	98.8798
SP_PIR_KEYWORDS	ribosomal protein	4	2.15054	0.259478	RPLP1, MRPS10, MRPS6, MRPL33	179	177	17854	2.25408	1	0.86021	98.0381
GOTERM_CC_FAT	GO:0005840~ribosome	4	2.15054	0.401777	RPLP1, MRPS10, MRPS6, MRPL33	150	192	12504	1.73667	1	0.909627	99.8798
SP_PIR_KEYWORDS	ribonucleoprotein	4	2.15054	0.496499	RPLP1, MRPS10, MRPS6, MRPL33	179	266	17854	1.49989	1	0.970549	99.9874
GOTERM_CC_FAT	GO:0030529~ribonucleoprotein complex	6	3.22581	0.649112	ZMAT5, RPLP1, MRPS10, MRPS6, MRPL33, GTF3C1	150	462	12504	1.0826	1	0.977873	99.9999
Annotation Cluster 30	Enrichment Score: 0.39342513808169916
Category	Term	Count	%	PValue	Genes	List Total	Pop Hits	Pop Total	Fold Enrichment	Bonferroni	Benjamini	FDR
GOTERM_MF_FAT	GO:0004842~ubiquitin-protein ligase activity	3	1.6129	0.273606	AURKAIP1, UBE2M, SKP1A	132	104	13288	2.90385	1	0.935167	98.5762
GOTERM_MF_FAT	GO:0019787~small conjugating protein ligase activity	3	1.6129	0.34981	AURKAIP1, UBE2M, SKP1A	132	125	13288	2.416	1	0.966148	99.674
GOTERM_MF_FAT	GO:0016881~acid-amino acid ligase activity	3	1.6129	0.489049	AURKAIP1, UBE2M, SKP1A	132	166	13288	1.81928	1	0.988215	99.9868
GOTERM_MF_FAT	GO:0016879~ligase activity, forming carbon-nitrogen bonds	3	1.6129	0.570149	AURKAIP1, UBE2M, SKP1A	132	193	13288	1.56477	1	0.99521	99.9987
Annotation Cluster 31	Enrichment Score: 0.3875300607800984
Category	Term	Count	%	PValue	Genes	List Total	Pop Hits	Pop Total	Fold Enrichment	Bonferroni	Benjamini	FDR
SP_PIR_KEYWORDS	immune response	4	2.15054	0.277267	C1QA, H2-D1, PTMS, B2M	179	184	17854	2.16833	1	0.868086	98.5728
GOTERM_BP_FAT	GO:0048584~positive regulation of response to stimulus	4	2.15054	0.315393	C1QA, CARD9, NPY, B2M	145	186	13588	2.01528	1	0.974959	99.7289
GOTERM_BP_FAT	GO:0006955~immune response	7	3.76344	0.382454	C1QA, CARD9, H2-D1, PTMS, FTH1, B2M, BCAP31	145	471	13588	1.39272	1	0.987798	99.9457
GOTERM_BP_FAT	GO:0050778~positive regulation of immune response	3	1.6129	0.423874	C1QA, CARD9, B2M	145	136	13588	2.06714	1	0.991758	99.9816
GOTERM_BP_FAT	GO:0006952~defense response	6	3.22581	0.517198	C1QA, CARD9, SAA2, SAA1, H2-D1, B2M	145	448	13588	1.25505	1	0.997067	99.9988
GOTERM_BP_FAT	GO:0002684~positive regulation of immune system process	3	1.6129	0.645055	C1QA, CARD9, B2M	145	206	13588	1.36471	1	0.999479	100
Annotation Cluster 32	Enrichment Score: 0.3503999879293346
Category	Term	Count	%	PValue	Genes	List Total	Pop Hits	Pop Total	Fold Enrichment	Bonferroni	Benjamini	FDR
GOTERM_MF_FAT	GO:0016776~phosphotransferase activity, phosphate group as acceptor	3	1.6129	0.0288256	PMVK, GUK1, NME7	132	27	13288	11.1852	0.999799	0.309312	32.2295
SP_PIR_KEYWORDS	kinase	7	3.76344	0.711959	HUNK, AURKAIP1, PINK1, SKP1A, PMVK, GUK1, NME7	179	707	17854	0.987555	1	0.993375	100
UP_SEQ_FEATURE	binding site:ATP	5	2.68817	0.865412	HUNK, PINK1, IARS2, PMVK, NME7	181	545	16021	0.812053	1	1	100
UP_SEQ_FEATURE	nucleotide phosphate-binding region:ATP	4	2.15054	0.998135	HUNK, PINK1, PMVK, GUK1	181	907	16021	0.390359	1	1	100
SP_PIR_KEYWORDS	transferase	6	3.22581	0.998513	HUNK, PINK1, TKT, PMVK, GUK1, NME7	179	1385	17854	0.4321	1	1	100
Annotation Cluster 33	Enrichment Score: 0.3407532241892217
Category	Term	Count	%	PValue	Genes	List Total	Pop Hits	Pop Total	Fold Enrichment	Bonferroni	Benjamini	FDR
SP_PIR_KEYWORDS	er-golgi transport	4	2.15054	0.0444203	TRAPPC2L, NAPB, RTN3, BCAP31	179	79	17854	5.05028	0.999993	0.378849	44.823
GOTERM_BP_FAT	GO:0016192~vesicle-mediated transport	9	4.83871	0.122206	CPLX1, CLTB, TFRC, AP2S1, TRAPPC2L, NAPB, TRIP10, RTN3, BCAP31	145	466	13588	1.80986	1	0.805697	86.908
GOTERM_BP_FAT	GO:0006886~intracellular protein transport	4	2.15054	0.563082	CLTB, AP2S1, NAPB, BCAP31	145	276	13588	1.35812	1	0.998346	99.9998
GOTERM_BP_FAT	GO:0034613~cellular protein localization	4	2.15054	0.617571	CLTB, AP2S1, NAPB, BCAP31	145	299	13588	1.25365	1	0.999331	100
GOTERM_BP_FAT	GO:0070727~cellular macromolecule localization	4	2.15054	0.622089	CLTB, AP2S1, NAPB, BCAP31	145	301	13588	1.24532	1	0.99931	100
GOTERM_BP_FAT	GO:0046907~intracellular transport	5	2.68817	0.674509	CLTB, AP2S1, TRAPPC2L, NAPB, BCAP31	145	431	13588	1.08713	1	0.999664	100
GOTERM_BP_FAT	GO:0008104~protein localization	8	4.30108	0.692406	PFN1, CLTB, APOE, AP2S1, SNF8, TMSB4X, NAPB, BCAP31	145	753	13588	0.995595	1	0.999672	100
SP_PIR_KEYWORDS	protein transport	4	2.15054	0.841914	AP2S1, SNF8, NAPB, BCAP31	179	461	17854	0.865449	1	0.998996	100
GOTERM_BP_FAT	GO:0015031~protein transport	5	2.68817	0.919115	CLTB, AP2S1, SNF8, NAPB, BCAP31	145	651	13588	0.719742	1	0.999999	100
GOTERM_BP_FAT	GO:0045184~establishment of protein localization	5	2.68817	0.921929	CLTB, AP2S1, SNF8, NAPB, BCAP31	145	656	13588	0.714256	1	0.999999	100
Annotation Cluster 34	Enrichment Score: 0.32272247694490847
Category	Term	Count	%	PValue	Genes	List Total	Pop Hits	Pop Total	Fold Enrichment	Bonferroni	Benjamini	FDR
GOTERM_BP_FAT	GO:0006916~anti-apoptosis	3	1.6129	0.23923	CLU, HSPA1B, PRNP	145	88	13588	3.19467	1	0.949274	98.5949
GOTERM_BP_FAT	GO:0042981~regulation of apoptosis	8	4.30108	0.370645	CARD9, S100B, SNCB, APOE, MTCH1, CLU, HSPA1B, PRNP	145	553	13588	1.35567	1	0.986105	99.927
GOTERM_BP_FAT	GO:0043067~regulation of programmed cell death	8	4.30108	0.38286	CARD9, S100B, SNCB, APOE, MTCH1, CLU, HSPA1B, PRNP	145	560	13588	1.33872	1	0.987324	99.9463
GOTERM_BP_FAT	GO:0010941~regulation of cell death	8	4.30108	0.388101	CARD9, S100B, SNCB, APOE, MTCH1, CLU, HSPA1B, PRNP	145	563	13588	1.33159	1	0.987738	99.953
GOTERM_BP_FAT	GO:0043066~negative regulation of apoptosis	4	2.15054	0.466488	SNCB, CLU, HSPA1B, PRNP	145	239	13588	1.56837	1	0.995551	99.9945
GOTERM_BP_FAT	GO:0043069~negative regulation of programmed cell death	4	2.15054	0.480108	SNCB, CLU, HSPA1B, PRNP	145	244	13588	1.53624	1	0.996246	99.9963
GOTERM_BP_FAT	GO:0060548~negative regulation of cell death	4	2.15054	0.482813	SNCB, CLU, HSPA1B, PRNP	145	245	13588	1.52996	1	0.996215	99.9966
GOTERM_BP_FAT	GO:0043065~positive regulation of apoptosis	3	1.6129	0.74249	S100B, APOE, MTCH1	145	248	13588	1.13359	1	0.999854	100
GOTERM_BP_FAT	GO:0043068~positive regulation of programmed cell death	3	1.6129	0.746508	S100B, APOE, MTCH1	145	250	13588	1.12452	1	0.999851	100
GOTERM_BP_FAT	GO:0010942~positive regulation of cell death	3	1.6129	0.750472	S100B, APOE, MTCH1	145	252	13588	1.1156	1	0.999856	100
Annotation Cluster 35	Enrichment Score: 0.3162638189248053
Category	Term	Count	%	PValue	Genes	List Total	Pop Hits	Pop Total	Fold Enrichment	Bonferroni	Benjamini	FDR
GOTERM_BP_FAT	GO:0002526~acute inflammatory response	3	1.6129	0.211891	C1QA, SAA2, SAA1	145	81	13588	3.47075	1	0.930084	97.5628
GOTERM_BP_FAT	GO:0006952~defense response	6	3.22581	0.517198	C1QA, CARD9, SAA2, SAA1, H2-D1, B2M	145	448	13588	1.25505	1	0.997067	99.9988
GOTERM_BP_FAT	GO:0006954~inflammatory response	3	1.6129	0.692307	C1QA, SAA2, SAA1	145	225	13588	1.24947	1	0.999691	100
GOTERM_BP_FAT	GO:0009611~response to wounding	4	2.15054	0.71594	C1QA, SAA2, SAA1, CTSB	145	347	13588	1.08023	1	0.999769	100
Annotation Cluster 36	Enrichment Score: 0.2911244454575872
Category	Term	Count	%	PValue	Genes	List Total	Pop Hits	Pop Total	Fold Enrichment	Bonferroni	Benjamini	FDR
SP_PIR_KEYWORDS	lipoprotein	8	4.30108	0.372682	RND2, TFRC, APOE, DNAJA1, GNAS, PRNP, NRN1, SNAP25	179	589	17854	1.35474	1	0.929764	99.7762
UP_SEQ_FEATURE	lipid moiety-binding region:S-palmitoyl cysteine	3	1.6129	0.587492	TFRC, GNAS, SNAP25	181	175	16021	1.51738	1	1	99.9997
SP_PIR_KEYWORDS	palmitate	3	1.6129	0.611346	TFRC, GNAS, SNAP25	179	206	17854	1.45257	1	0.986005	99.9996
Annotation Cluster 37	Enrichment Score: 0.2752380097593894
Category	Term	Count	%	PValue	Genes	List Total	Pop Hits	Pop Total	Fold Enrichment	Bonferroni	Benjamini	FDR
GOTERM_CC_FAT	GO:0045202~synapse	7	3.76344	0.181227	GABRA2, CPLX1, SPARCL1, ATP6V1G2, SNAP25, FAIM2, MT3	150	319	12504	1.82922	1	0.721328	92.6955
SP_PIR_KEYWORDS	synapse	3	1.6129	0.62954	GABRA2, SNAP25, FAIM2	179	213	17854	1.40483	1	0.986913	99.9998
SP_PIR_KEYWORDS	cell junction	4	2.15054	0.752826	GABRA2, PCP4, SNAP25, FAIM2	179	392	17854	1.01779	1	0.996106	100
GOTERM_CC_FAT	GO:0030054~cell junction	4	2.15054	0.922799	GABRA2, PCP4, SNAP25, FAIM2	150	470	12504	0.709447	1	0.999512	100
Annotation Cluster 38	Enrichment Score: 0.2529924216603223
Category	Term	Count	%	PValue	Genes	List Total	Pop Hits	Pop Total	Fold Enrichment	Bonferroni	Benjamini	FDR
SP_PIR_KEYWORDS	Apoptosis	6	3.22581	0.245726	FIS1, MTCH1, CLU, FAIM2, RTN3, BCAP31	179	337	17854	1.77584	1	0.856914	97.5039
GOTERM_BP_FAT	GO:0008219~cell death	6	3.22581	0.627731	FIS1, MTCH1, CLU, FAIM2, RTN3, BCAP31	145	507	13588	1.109	1	0.999344	100
GOTERM_BP_FAT	GO:0016265~death	6	3.22581	0.648299	FIS1, MTCH1, CLU, FAIM2, RTN3, BCAP31	145	519	13588	1.08336	1	0.999482	100
GOTERM_BP_FAT	GO:0006915~apoptosis	5	2.68817	0.73102	FIS1, MTCH1, FAIM2, RTN3, BCAP31	145	465	13588	1.00764	1	0.999818	100
GOTERM_BP_FAT	GO:0012501~programmed cell death	5	2.68817	0.743206	FIS1, MTCH1, FAIM2, RTN3, BCAP31	145	473	13588	0.990596	1	0.999847	100
Annotation Cluster 39	Enrichment Score: 0.17288364920556637
Category	Term	Count	%	PValue	Genes	List Total	Pop Hits	Pop Total	Fold Enrichment	Bonferroni	Benjamini	FDR
GOTERM_BP_FAT	GO:0007283~spermatogenesis	4	2.15054	0.509489	MEA1, DNAJA1, HSPA1B, BCAP31	145	255	13588	1.46997	1	0.996995	99.9985
GOTERM_BP_FAT	GO:0048232~male gamete generation	4	2.15054	0.509489	MEA1, DNAJA1, HSPA1B, BCAP31	145	255	13588	1.46997	1	0.996995	99.9985
GOTERM_BP_FAT	GO:0007276~gamete generation	4	2.15054	0.68549	MEA1, DNAJA1, HSPA1B, BCAP31	145	331	13588	1.13245	1	0.999662	100
GOTERM_BP_FAT	GO:0019953~sexual reproduction	4	2.15054	0.780633	MEA1, DNAJA1, HSPA1B, BCAP31	145	386	13588	0.971092	1	0.999923	100
GOTERM_BP_FAT	GO:0048609~reproductive process in a multicellular organism	4	2.15054	0.812812	MEA1, DNAJA1, HSPA1B, BCAP31	145	409	13588	0.916483	1	0.999954	100
GOTERM_BP_FAT	GO:0032504~multicellular organism reproduction	4	2.15054	0.812812	MEA1, DNAJA1, HSPA1B, BCAP31	145	409	13588	0.916483	1	0.999954	100
Annotation Cluster 40	Enrichment Score: 0.1713817136743677
Category	Term	Count	%	PValue	Genes	List Total	Pop Hits	Pop Total	Fold Enrichment	Bonferroni	Benjamini	FDR
GOTERM_BP_FAT	GO:0032990~cell part morphogenesis	4	2.15054	0.390622	FIS1, NDN, CLU, NRN1	145	212	13588	1.76812	1	0.987658	99.9559
GOTERM_BP_FAT	GO:0048812~neuron projection morphogenesis	3	1.6129	0.559223	NDN, CLU, NRN1	145	176	13588	1.59734	1	0.998324	99.9997
GOTERM_BP_FAT	GO:0048858~cell projection morphogenesis	3	1.6129	0.634412	NDN, CLU, NRN1	145	202	13588	1.39174	1	0.999391	100
GOTERM_BP_FAT	GO:0030030~cell projection organization	4	2.15054	0.661118	NDN, CLU, NRN1, TUBB4	145	319	13588	1.17505	1	0.999579	100
GOTERM_BP_FAT	GO:0031175~neuron projection development	3	1.6129	0.675526	NDN, CLU, NRN1	145	218	13588	1.28959	1	0.999628	100
GOTERM_BP_FAT	GO:0032989~cellular component morphogenesis	4	2.15054	0.72319	FIS1, NDN, CLU, NRN1	145	351	13588	1.06792	1	0.999793	100
GOTERM_BP_FAT	GO:0048666~neuron development	3	1.6129	0.819253	NDN, CLU, NRN1	145	292	13588	0.962778	1	0.99996	100
GOTERM_BP_FAT	GO:0000902~cell morphogenesis	3	1.6129	0.842998	NDN, CLU, NRN1	145	309	13588	0.909809	1	0.999977	100
GOTERM_BP_FAT	GO:0030182~neuron differentiation	3	1.6129	0.927755	NDN, CLU, NRN1	145	399	13588	0.704589	1	0.999999	100
Annotation Cluster 41	Enrichment Score: 0.16480501892144817
Category	Term	Count	%	PValue	Genes	List Total	Pop Hits	Pop Total	Fold Enrichment	Bonferroni	Benjamini	FDR
SP_PIR_KEYWORDS	ionic channel	4	2.15054	0.580031	GABRA2, SCN1B, KCNJ11, FXYD7	179	301	17854	1.32549	1	0.98146	99.9988
GOTERM_MF_FAT	GO:0005216~ion channel activity	4	2.15054	0.67301	GABRA2, SCN1B, KCNJ11, FXYD7	132	349	13288	1.15377	1	0.998302	100
GOTERM_MF_FAT	GO:0022838~substrate specific channel activity	4	2.15054	0.693362	GABRA2, SCN1B, KCNJ11, FXYD7	132	360	13288	1.11852	1	0.998482	100
GOTERM_MF_FAT	GO:0022803~passive transmembrane transporter activity	4	2.15054	0.702297	GABRA2, SCN1B, KCNJ11, FXYD7	132	365	13288	1.1032	1	0.998356	100
GOTERM_MF_FAT	GO:0015267~channel activity	4	2.15054	0.702297	GABRA2, SCN1B, KCNJ11, FXYD7	132	365	13288	1.1032	1	0.998356	100
GOTERM_MF_FAT	GO:0022836~gated channel activity	3	1.6129	0.768591	GABRA2, SCN1B, KCNJ11	132	281	13288	1.07473	1	0.999431	100
Annotation Cluster 42	Enrichment Score: 0.15917516674329105
Category	Term	Count	%	PValue	Genes	List Total	Pop Hits	Pop Total	Fold Enrichment	Bonferroni	Benjamini	FDR
GOTERM_CC_FAT	GO:0031974~membrane-enclosed lumen	17	9.13978	0.3238	NDN, A730008H23RIK, 1110036O03RIK, MRPS10, HSPA1B, IARS2, ELL3, HAGH, PPIB, CREG1, CACYBP, SNF8, COX6B1, TMSB4X, DNAJB1, COX17, CHD3	150	1174	12504	1.20709	1	0.871296	99.4026
GOTERM_CC_FAT	GO:0043233~organelle lumen	14	7.52688	0.603184	NDN, A730008H23RIK, 1110036O03RIK, MRPS10, IARS2, HSPA1B, ELL3, HAGH, PPIB, CREG1, SNF8, TMSB4X, DNAJB1, CHD3	150	1136	12504	1.02732	1	0.971595	99.9994
GOTERM_CC_FAT	GO:0070013~intracellular organelle lumen	13	6.98925	0.708175	NDN, A730008H23RIK, 1110036O03RIK, MRPS10, IARS2, HSPA1B, ELL3, HAGH, PPIB, SNF8, CREG1, DNAJB1, CHD3	150	1133	12504	0.95647	1	0.984863	100
GOTERM_CC_FAT	GO:0031981~nuclear lumen	8	4.30108	0.909036	NDN, CREG1, SNF8, A730008H23RIK, 1110036O03RIK, DNAJB1, ELL3, CHD3	150	883	12504	0.755243	1	0.999268	100
GOTERM_CC_FAT	GO:0005654~nucleoplasm	5	2.68817	0.931082	NDN, CREG1, SNF8, ELL3, CHD3	150	599	12504	0.695826	1	0.99962	100
GOTERM_CC_FAT	GO:0044451~nucleoplasm part	4	2.15054	0.947355	CREG1, SNF8, ELL3, CHD3	150	513	12504	0.649981	1	0.999792	100
Annotation Cluster 43	Enrichment Score: 0.15284891375888832
Category	Term	Count	%	PValue	Genes	List Total	Pop Hits	Pop Total	Fold Enrichment	Bonferroni	Benjamini	FDR
SMART	SM00409:IG	3	1.6129	0.526173	BSG, CADM4, PCP4	52	313	9131	1.68303	1	0.999998	99.9316
SP_PIR_KEYWORDS	Immunoglobulin domain	5	2.68817	0.647749	BSG, SCN1B, CADM4, PCP4, B2M	179	443	17854	1.12577	1	0.986954	99.9999
INTERPRO	IPR013783:Immunoglobulin-like fold	6	3.22581	0.747168	BSG, SCN1B, CADM4, PCP4, H2-D1, B2M	172	644	17763	0.962173	1	1	100
INTERPRO	IPR003599:Immunoglobulin subtype	3	1.6129	0.806883	BSG, CADM4, PCP4	172	313	17763	0.98984	1	1	100
INTERPRO	IPR007110:Immunoglobulin-like	5	2.68817	0.837513	BSG, CADM4, PCP4, H2-D1, B2M	172	604	17763	0.854911	1	1	100
Annotation Cluster 44	Enrichment Score: 0.13505550045692957
Category	Term	Count	%	PValue	Genes	List Total	Pop Hits	Pop Total	Fold Enrichment	Bonferroni	Benjamini	FDR
SP_PIR_KEYWORDS	disulfide bond	26	13.9785	0.499691	SCN1B, CADM4, CLTB, CLU, H2-D1, PRDX5, B2M, LGALS3BP, PCP4, COX6B1, COX17, BSG, NDUFA2, GABRA2, SPARCL1, PSAP, SPARC, VEGFB, C1QA, CTSL, TFRC, CTSD, ADAM22, CTSB, PRNP, ROM1	179	2469	17854	1.05035	1	0.969477	99.9884
SP_PIR_KEYWORDS	Secreted	15	8.06452	0.557749	SPARCL1, PSAP, CLU, SPARC, B2M, VEGFB, C1QA, SCGN, LGALS3BP, SAA2, NPY, APOE, SAA1, CREG1, CCDC126	179	1420	17854	1.05362	1	0.978009	99.9977
SP_PIR_KEYWORDS	signal	29	15.5914	0.658519	SCN1B, CADM4, ATP6AP2, ATP6AP1, CLU, H2-D1, NRN1, B2M, LGALS3BP, SAA2, APOE, SAA1, PCP4, CCDC126, CREG1, BSG, GABRA2, SPARCL1, PSAP, SPARC, VEGFB, C1QA, CTSL, PPIB, NPY, CTSD, ADAM22, CTSB, PRNP	179	2970	17854	0.973922	1	0.987705	99.9999
GOTERM_CC_FAT	GO:0005576~extracellular region	19	10.2151	0.722475	PSAP, SPARCL1, CLU, SPARC, B2M, VEGFB, C1QA, PFN1, SCGN, LGALS3BP, S100B, SAA2, NPY, SAA1, APOE, CREG1, CCDC126, TMSB4X, CTSB	150	1680	12504	0.942762	1	0.986508	100
UP_SEQ_FEATURE	disulfide bond	25	13.4409	0.74774	SCN1B, CADM4, CLTB, CLU, H2-D1, PRDX5, B2M, LGALS3BP, PCP4, COX6B1, COX17, BSG, NDUFA2, GABRA2, SPARCL1, PSAP, SPARC, VEGFB, C1QA, CTSL, TFRC, CTSD, ADAM22, CTSB, PRNP	181	2379	16021	0.930158	1	1	100
UP_SEQ_FEATURE	signal peptide	29	15.5914	0.869472	SCN1B, CADM4, ATP6AP2, ATP6AP1, CLU, H2-D1, NRN1, B2M, LGALS3BP, SAA2, APOE, SAA1, PCP4, CCDC126, CREG1, BSG, GABRA2, SPARCL1, PSAP, SPARC, VEGFB, C1QA, CTSL, PPIB, NPY, CTSD, ADAM22, CTSB, PRNP	181	2963	16021	0.866318	1	1	100
SP_PIR_KEYWORDS	glycoprotein	28	15.0538	0.964733	SCN1B, CADM4, ATP6AP1, CLU, H2-D1, DISP2, NRN1, ITM2C, LGALS3BP, PCP4, CCDC126, CREG1, PLD3, BSG, GABRA2, SPARCL1, PSAP, SPARC, VEGFB, C1QA, CTSL, TFRC, CTSD, GNAS, ADAM22, CTSB, PRNP, FAIM2	179	3600	17854	0.775779	1	0.999983	100
UP_SEQ_FEATURE	glycosylation site:N-linked (GlcNAc...)	24	12.9032	0.999105	PLD3, BSG, GABRA2, CADM4, SCN1B, PSAP, SPARCL1, ATP6AP1, CLU, H2-D1, DISP2, SPARC, ITM2C, C1QA, LGALS3BP, TFRC, PCP4, CREG1, CCDC126, CTSD, ADAM22, CTSB, PRNP, FAIM2	181	3444	16021	0.616821	1	1	100
Annotation Cluster 45	Enrichment Score: 0.126562779885196
Category	Term	Count	%	PValue	Genes	List Total	Pop Hits	Pop Total	Fold Enrichment	Bonferroni	Benjamini	FDR
SP_PIR_KEYWORDS	membrane	62	33.3333	0.180209	TM7SF2, CADM4, CLTB, WFS1, ATP6AP2, AP2S1, NSG2, ATP6AP1, H2-D1, PINK1, KCNJ11, RTN3, MBP, TMEM147, CYP39A1, PCP4, ATP5O, ATP5K, ATP5J, PLD3, BSG, FLOT1, NDUFC2, BCAP31, RND2, SLC41A3, GNAS, PRNP, FAIM2, ROM1, SCN1B, COX7A2L, NAPB, DISP2, NRN1, ITM2C, FXYD7, FIS1, SLC35B2, SERINC1, MTCH1, SNF8, ENO2, DNAJA1, TRIP10, SNAP25, ARMCX6, NDUFA4, GABRA2, NDUFA2, GABARAPL1, NDUFA3, NDUFA6, COX8A, ATP1A3,…	179	5507	17854	1.12295	1	0.764523	92.5758
UP_SEQ_FEATURE	transmembrane region	37	19.8925	0.969632	TM7SF2, SCN1B, CADM4, ATP6AP2, WFS1, ATP6AP1, NSG2, H2-D1, PINK1, DISP2, ITM2C, KCNJ11, FXYD7, RTN3, TMEM147, FIS1, PCP4, SLC35B2, SERINC1, MTCH1, ARMCX6, PLD3, GABRA2, BSG, NDUFA3, COX8A, NDUFC2, ATP1A3, REEP1, NDUFA1, BCAP31, ATP2A2, TFRC, SLC41A3, ADAM22, FAIM2, ROM1	181	4113	16021	0.796258	1	1	100
SP_PIR_KEYWORDS	transmembrane	37	19.8925	0.997862	TM7SF2, SCN1B, CADM4, ATP6AP2, WFS1, ATP6AP1, NSG2, H2-D1, PINK1, DISP2, ITM2C, KCNJ11, FXYD7, RTN3, TMEM147, FIS1, PCP4, SLC35B2, SERINC1, MTCH1, ARMCX6, PLD3, GABRA2, BSG, NDUFA3, COX8A, NDUFC2, ATP1A3, REEP1, NDUFA1, BCAP31, ATP2A2, TFRC, SLC41A3, ADAM22, FAIM2, ROM1	179	5237	17854	0.704696	1	1	100
UP_SEQ_FEATURE	topological domain:Cytoplasmic	19	10.2151	0.998087	PLD3, BSG, GABRA2, CADM4, SCN1B, ATP6AP2, NSG2, H2-D1, ATP1A3, PINK1, KCNJ11, BCAP31, FIS1, TFRC, ATP2A2, PCP4, SERINC1, ADAM22, ROM1	181	2780	16021	0.604951	1	1	100
GOTERM_CC_FAT	GO:0031224~intrinsic to membrane	43	23.1183	0.999999	TM7SF2, SCN1B, CADM4, ATP6AP2, WFS1, ATP6AP1, NSG2, H2-D1, PINK1, ATP6V1G2, DISP2, NRN1, ITM2C, KCNJ11, FXYD7, RTN3, FIS1, TMEM147, PCP4, SLC35B2, SERINC1, MTCH1, DNAJA1, SNAP25, ARMCX6, PLD3, GABRA2, BSG, NDUFA3, COX8A, NDUFC2, ATP1A3, REEP1, NDUFA1, BCAP31, ATP2A2, TFRC, SLC41A3, ASPHD1, ADAM22, PRNP, FAIM2, ROM1	150	5914	12504	0.606101	1	1	100
GOTERM_CC_FAT	GO:0016021~integral to membrane	39	20.9677	1	TM7SF2, SCN1B, CADM4, ATP6AP2, WFS1, ATP6AP1, NSG2, H2-D1, PINK1, ATP6V1G2, DISP2, ITM2C, KCNJ11, FXYD7, RTN3, FIS1, TMEM147, PCP4, SLC35B2, SERINC1, MTCH1, ARMCX6, PLD3, GABRA2, BSG, NDUFA3, COX8A, NDUFC2, ATP1A3, REEP1, NDUFA1, BCAP31, ATP2A2, TFRC, SLC41A3, ASPHD1, ADAM22, FAIM2, ROM1	150	5709	12504	0.569459	1	1	100
Annotation Cluster 46	Enrichment Score: 0.10722704815130608
Category	Term	Count	%	PValue	Genes	List Total	Pop Hits	Pop Total	Fold Enrichment	Bonferroni	Benjamini	FDR
GOTERM_BP_FAT	GO:0006508~proteolysis	12	6.45161	0.540229	EML2, C1QA, CTSL, PSMB6, UBE2M, CACYBP, SHFM1, CTSD, ANAPC11, CTSB, ADAM22, SKP1A	145	1034	13588	1.08755	1	0.997906	99.9995
KEGG_PATHWAY	mmu04120:Ubiquitin mediated proteolysis	3	1.6129	0.590159	UBE2M, ANAPC11, SKP1A	84	136	5738	1.50683	1	0.996767	99.9939
GOTERM_BP_FAT	GO:0044265~cellular macromolecule catabolic process	6	3.22581	0.778991	PSMB6, APOE, UBE2M, CACYBP, ANAPC11, SKP1A	145	609	13588	0.923255	1	0.999924	100
GOTERM_BP_FAT	GO:0051603~proteolysis involved in cellular protein catabolic process	5	2.68817	0.822743	PSMB6, UBE2M, CACYBP, ANAPC11, SKP1A	145	534	13588	0.877438	1	0.999962	100
GOTERM_BP_FAT	GO:0044257~cellular protein catabolic process	5	2.68817	0.826073	PSMB6, UBE2M, CACYBP, ANAPC11, SKP1A	145	537	13588	0.872536	1	0.999963	100
GOTERM_BP_FAT	GO:0009057~macromolecule catabolic process	6	3.22581	0.828798	PSMB6, APOE, UBE2M, CACYBP, ANAPC11, SKP1A	145	654	13588	0.859728	1	0.999964	100
GOTERM_BP_FAT	GO:0030163~protein catabolic process	5	2.68817	0.845993	PSMB6, UBE2M, CACYBP, ANAPC11, SKP1A	145	556	13588	0.842719	1	0.999978	100
SP_PIR_KEYWORDS	ubl conjugation pathway	4	2.15054	0.864755	UBE2M, CACYBP, ANAPC11, SKP1A	179	484	17854	0.824322	1	0.999378	100
GOTERM_BP_FAT	GO:0019941~modification-dependent protein catabolic process	4	2.15054	0.909556	UBE2M, CACYBP, ANAPC11, SKP1A	145	508	13588	0.737877	1	0.999999	100
GOTERM_BP_FAT	GO:0043632~modification-dependent macromolecule catabolic process	4	2.15054	0.909556	UBE2M, CACYBP, ANAPC11, SKP1A	145	508	13588	0.737877	1	0.999999	100
Annotation Cluster 47	Enrichment Score: 0.09921003449579802
Category	Term	Count	%	PValue	Genes	List Total	Pop Hits	Pop Total	Fold Enrichment	Bonferroni	Benjamini	FDR
SP_PIR_KEYWORDS	extracellular matrix	3	1.6129	0.62954	LGALS3BP, SPARCL1, SPARC	179	213	17854	1.40483	1	0.986913	99.9998
GOTERM_CC_FAT	GO:0044421~extracellular region part	8	4.30108	0.82304	LGALS3BP, NPY, SAA2, PSAP, SAA1, APOE, SPARCL1, SPARC	150	774	12504	0.861602	1	0.996309	100
GOTERM_CC_FAT	GO:0005578~proteinaceous extracellular matrix	3	1.6129	0.872845	LGALS3BP, SPARCL1, SPARC	150	297	12504	0.84202	1	0.998512	100
GOTERM_CC_FAT	GO:0031012~extracellular matrix	3	1.6129	0.886703	LGALS3BP, SPARCL1, SPARC	150	309	12504	0.80932	1	0.998878	100
Annotation Cluster 48	Enrichment Score: 0.09872840465767385
Category	Term	Count	%	PValue	Genes	List Total	Pop Hits	Pop Total	Fold Enrichment	Bonferroni	Benjamini	FDR
GOTERM_MF_FAT	GO:0043167~ion binding	38	20.4301	0.665861	CNBP, SCN1B, CLTB, ZMAT5, ZFP414, PINK1, IARS2, ANAPC11, KCNJ11, FTH1, ASPA, CYP39A1, PCP4, NUDT9, NDUFS8, ENO2, MT2, DNAJA1, MT1, HBB-B1, COX17, MT3, CHD3, GABRA2, CRIP2, SPARCL1, ATP1A3, S100A10, TKT, SPARC, NME7, HAGH, SCGN, ATP2A2, S100B, CALM3, ADAM22, PRNP	132	3934	13288	0.972378	1	0.998305	100
GOTERM_MF_FAT	GO:0046872~metal ion binding	37	19.8925	0.678893	CNBP, SCN1B, CLTB, ZMAT5, ZFP414, PINK1, IARS2, ANAPC11, KCNJ11, FTH1, ASPA, CYP39A1, PCP4, NUDT9, NDUFS8, ENO2, MT2, DNAJA1, MT1, HBB-B1, COX17, MT3, CHD3, CRIP2, SPARCL1, ATP1A3, S100A10, TKT, SPARC, NME7, HAGH, SCGN, ATP2A2, S100B, CALM3, ADAM22, PRNP	132	3850	13288	0.967446	1	0.998266	100
GOTERM_MF_FAT	GO:0043169~cation binding	37	19.8925	0.702282	CNBP, SCN1B, CLTB, ZMAT5, ZFP414, PINK1, IARS2, ANAPC11, KCNJ11, FTH1, ASPA, CYP39A1, PCP4, NUDT9, NDUFS8, ENO2, MT2, DNAJA1, MT1, HBB-B1, COX17, MT3, CHD3, CRIP2, SPARCL1, ATP1A3, S100A10, TKT, SPARC, NME7, HAGH, SCGN, ATP2A2, S100B, CALM3, ADAM22, PRNP	132	3885	13288	0.95873	1	0.99854	100
SP_PIR_KEYWORDS	metal-binding	24	12.9032	0.813057	CNBP, ZMAT5, CRIP2, ZFP414, ATP1A3, PINK1, TKT, ANAPC11, FTH1, NME7, HAGH, ASPA, CYP39A1, S100B, ATP2A2, NDUFS8, DNAJA1, MT2, ENO2, MT1, HBB-B1, COX17, CHD3, MT3	179	2682	17854	0.892555	1	0.998437	100
GOTERM_MF_FAT	GO:0046914~transition metal ion binding	23	12.3656	0.823395	CNBP, ZMAT5, ZFP414, CRIP2, ANAPC11, IARS2, SPARC, FTH1, HAGH, ASPA, CYP39A1, S100B, NUDT9, NDUFS8, DNAJA1, MT2, MT1, HBB-B1, ADAM22, PRNP, COX17, CHD3, MT3	132	2608	13288	0.887781	1	0.999807	100
GOTERM_MF_FAT	GO:0008270~zinc ion binding	15	8.06452	0.964996	CNBP, ZMAT5, ZFP414, CRIP2, ANAPC11, IARS2, HAGH, ASPA, S100B, DNAJA1, MT2, MT1, ADAM22, MT3, CHD3	132	2105	13288	0.71734	1	1	100
SP_PIR_KEYWORDS	zinc	11	5.91398	0.993002	HAGH, CNBP, ASPA, ZMAT5, S100B, ZFP414, CRIP2, DNAJA1, ANAPC11, CHD3, MT3	179	1886	17854	0.581746	1	1	100
Annotation Cluster 49	Enrichment Score: 0.07664513233054418
Category	Term	Count	%	PValue	Genes	List Total	Pop Hits	Pop Total	Fold Enrichment	Bonferroni	Benjamini	FDR
GOTERM_BP_FAT	GO:0051674~localization of cell	3	1.6129	0.807011	NDN, DNAJA1, ATP1A3	145	284	13588	0.989898	1	0.999951	100
GOTERM_BP_FAT	GO:0048870~cell motility	3	1.6129	0.807011	NDN, DNAJA1, ATP1A3	145	284	13588	0.989898	1	0.999951	100
GOTERM_BP_FAT	GO:0006928~cell motion	3	1.6129	0.904286	NDN, DNAJA1, ATP1A3	145	367	13588	0.766025	1	0.999998	100
Annotation Cluster 50	Enrichment Score: 0.05995870650001783
Category	Term	Count	%	PValue	Genes	List Total	Pop Hits	Pop Total	Fold Enrichment	Bonferroni	Benjamini	FDR
GOTERM_BP_FAT	GO:0000279~M phase	3	1.6129	0.80543	TUBB5, ANAPC11, DCTN3	145	283	13588	0.993396	1	0.999955	100
GOTERM_BP_FAT	GO:0022403~cell cycle phase	3	1.6129	0.866184	TUBB5, ANAPC11, DCTN3	145	328	13588	0.857107	1	0.999989	100
GOTERM_BP_FAT	GO:0007049~cell cycle	5	2.68817	0.893189	A730008H23RIK, TUBB5, CALM3, ANAPC11, DCTN3	145	611	13588	0.76686	1	0.999997	100
GOTERM_BP_FAT	GO:0022402~cell cycle process	3	1.6129	0.923811	TUBB5, ANAPC11, DCTN3	145	393	13588	0.715346	1	0.999999	100
Annotation Cluster 51	Enrichment Score: 0.03376275826060608
Category	Term	Count	%	PValue	Genes	List Total	Pop Hits	Pop Total	Fold Enrichment	Bonferroni	Benjamini	FDR
SP_PIR_KEYWORDS	cell adhesion	3	1.6129	0.895372	LGALS3BP, CADM4, ROM1	179	380	17854	0.787445	1	0.999662	100
GOTERM_BP_FAT	GO:0007155~cell adhesion	4	2.15054	0.940253	LGALS3BP, CADM4, PCP4, ROM1	145	561	13588	0.668166	1	1	100
GOTERM_BP_FAT	GO:0022610~biological adhesion	4	2.15054	0.940727	LGALS3BP, CADM4, PCP4, ROM1	145	562	13588	0.666978	1	1	100
Annotation Cluster 52	Enrichment Score: 0.015573499117271504
Category	Term	Count	%	PValue	Genes	List Total	Pop Hits	Pop Total	Fold Enrichment	Bonferroni	Benjamini	FDR
GOTERM_MF_FAT	GO:0008134~transcription factor binding	3	1.6129	0.780357	AES, CREG1, SNF8	132	288	13288	1.04861	1	0.999502	100
SP_PIR_KEYWORDS	repressor	3	1.6129	0.904316	CNBP, AES, 1810035L17RIK	179	391	17854	0.765292	1	0.999725	100
GOTERM_BP_FAT	GO:0006357~regulation of transcription from RNA polymerase II promoter	4	2.15054	0.961743	PFN1, CNBP, AES, SNF8	145	616	13588	0.608509	1	1	100
SP_PIR_KEYWORDS	transcription regulation	7	3.76344	0.998565	CNBP, AES, NDN, ZFP414, SNF8, ELL3, 1810035L17RIK	179	1546	17854	0.451618	1	1	100
SP_PIR_KEYWORDS	dna-binding	6	3.22581	0.998723	CNBP, NDN, ZFP414, A730008H23RIK, NFE2L1, GTF3C1	179	1404	17854	0.426252	1	1	100
GOTERM_BP_FAT	GO:0006355~regulation of transcription, DNA-dependent	7	3.76344	0.9988	PFN1, CNBP, AES, NDN, CREG1, SNF8, NFE2L1	145	1465	13588	0.447763	1	1	100
GOTERM_BP_FAT	GO:0051252~regulation of RNA metabolic process	7	3.76344	0.999011	PFN1, CNBP, AES, NDN, CREG1, SNF8, NFE2L1	145	1488	13588	0.440842	1	1	100
SP_PIR_KEYWORDS	Transcription	8	4.30108	0.999163	CNBP, AES, NDN, ZFP414, SNF8, ELL3, GTF3C1, 1810035L17RIK	179	1769	17854	0.451071	1	1	100
GOTERM_BP_FAT	GO:0045449~regulation of transcription	12	6.45161	0.999393	PFN1, CNBP, CARD9, AES, NDN, ZFP414, CREG1, SNF8, NFE2L1, ELL3, 1810035L17RIK, CHD3	145	2227	13588	0.50495	1	1	100
GOTERM_BP_FAT	GO:0006350~transcription	8	4.30108	0.999699	CNBP, AES, NDN, ZFP414, SNF8, ELL3, GTF3C1, 1810035L17RIK	145	1772	13588	0.423072	1	1	100
GOTERM_MF_FAT	GO:0003677~DNA binding	7	3.76344	0.999786	CNBP, NDN, ZFP414, A730008H23RIK, NFE2L1, GTF3C1, CHD3	132	1781	13288	0.395658	1	1	100
Annotation Cluster 53	Enrichment Score: 3.273572810409754E-4
Category	Term	Count	%	PValue	Genes	List Total	Pop Hits	Pop Total	Fold Enrichment	Bonferroni	Benjamini	FDR
GOTERM_BP_FAT	GO:0050877~neurological system process	9	4.83871	0.998048	CPLX1, S100B, NDN, GNB1, MTAP1A, ATP1A3, SNAP25, ROM1, MBP	145	1681	13588	0.501721	1	1	100
GOTERM_BP_FAT	GO:0050890~cognition	6	3.22581	0.999715	S100B, NDN, GNB1, MTAP1A, ATP1A3, ROM1	145	1480	13588	0.379907	1	1	100
GOTERM_BP_FAT	GO:0007600~sensory perception	4	2.15054	0.999978	NDN, GNB1, MTAP1A, ROM1	145	1402	13588	0.267362	1	1	100
