# Supplementary material for: RNA-Seq Profiling of Spinal Cord Motor Neurons from a Presymptomatic SOD1 ALS Mouse
Source: PLoS One. 2013 Jan 3;8(1):e53575. doi: 10.1371/journal.pone.0053575 (PMC3536741; doi:10.1371/journal.pone.0053575)
Supplement: Table S5 — Splice identification in wild-type and G85R motor neurons. Identification and number of reads supporting each novel splice in each RNA-Seq replicate. Columns are: UCSC transcript id, MGI gene symbol, Entrez Gene accession number, junction coordinate, Reads mapping to junction from wild-type replicate 1, wild-type replicate 2, G85R replicate 1, and G85R replicate 2. (XLS) [file pone.0053575.s010.xls]

## Sheet: Table_S5_splicing
ucsc_transcript_id	mgi_gene_symbol	entrezgene_id	junction_coordinate	wildtype_r1	wildtype_r2	G85R_r1	G85R_r2
uc007gxv.1|uc007gxw.1	Cep290	null	chr10:+:100009146:100011362	3	2	0	0
uc007gxv.1|uc007gxw.1	Cep290	null	chr10:+:100030788:100034697	0	0	0	1
uc007eje.1	9130014G24Rik	215772	chr10:-:10055924:10059345	2	1	0	0
uc007eje.1	9130014G24Rik	215772	chr10:-:10059528:10060232	3	0	0	0
uc007eje.1	9130014G24Rik	215772	chr10:-:10060322:10066205	0	1	0	0
uc007eje.1	9130014G24Rik	215772	chr10:-:10066372:10069268	1	0	0	0
uc007eje.1	9130014G24Rik	215772	chr10:-:10097839:10098463	1	0	0	0
uc007eje.1	9130014G24Rik	215772	chr10:-:10098647:10102523	3	0	0	0
uc007eje.1	9130014G24Rik	215772	chr10:-:10118769:10120381	1	1	0	0
uc007eje.1	9130014G24Rik	215772	chr10:-:10130675:10131512	0	1	0	0
uc007gyb.1	AK015051	N/A	chr10:+:101621693:101668718	0	1	0	0
uc007gyb.1	AK015051	N/A	chr10:+:101707404:101735998	0	0	0	1
uc007gyc.1|uc007gyd.1	Mgat4c	67569	chr10:+:101813618:101840786	0	0	0	1
N/A	N/A	N/A	chr10:+:101833027:101840244	0	0	1	2
uc007gyc.1|uc007gyd.1	Mgat4c	67569	chr10:+:101833027:101840786	0	0	1	0
N/A	N/A	N/A	chr10:-:101945117:101947450	0	1	0	0
uc007gye.1	Nts	67405	chr10:-:101947728:101952888	0	1	0	0
N/A	N/A	N/A	chr10:-:102607533:102608041	0	0	0	1
uc007gyh.1|uc007gyi.1	Lrriq1	74978	chr10:-:102687605:102689810	0	0	3	0
uc007gyh.1|uc007gyi.1	Lrriq1	74978	chr10:-:102689936:102696647	0	1	0	0
uc007gyj.1|uc007gyk.1	Slc6a15	103098	chr10:+:102830787:102832006	3	0	0	0
N/A	N/A	N/A	chr10:+:102830954:102851531	0	0	1	1
uc007ejh.1|uc007eji.1|uc007ejj.1	Grm1	14816	chr10:-:10409700:10417846	0	1	0	0
N/A	N/A	N/A	chr10:+:105012856:105017459	0	1	0	0
N/A	N/A	N/A	chr10:+:105017643:105018981	0	0	1	1
uc007gyo.1	BC067068	216292	chr10:-:105216737:105260216	0	1	0	0
uc007gyr.1|uc007gys.1|uc007gyu.1	Ppfia2	327814	chr10:+:106199203:106237793	2	0	0	0
N/A	N/A	N/A	chr10:+:106256613:106265933	2	1	0	0
uc007gyr.1|uc007gys.1|uc007gyu.1	Ppfia2	327814	chr10:+:106267756:106273108	1	0	0	0
uc007gyv.1|uc007gyw.1	8430416H19Rik	N/A	chr10:-:106404099:106425862	0	0	0	1
uc007gyv.1|uc007gyw.1	8430416H19Rik	N/A	chr10:-:106522007:106560344	1	0	0	0
N/A	N/A	N/A	chr10:+:106761049:106817136	0	0	3	2
uc007gyx.1|uc007gyy.1	Lin7a	108030	chr10:+:106761085:106849009	0	0	1	0
uc007gyx.1|uc007gyy.1	Lin7a	108030	chr10:+:106817207:106849009	0	0	1	0
uc007gzb.1	Ptprq	237523	chr10:-:107000319:107002897	0	0	1	0
uc007gzb.1	Ptprq	237523	chr10:-:107017325:107019404	0	0	0	1
uc007gzb.1	Ptprq	237523	chr10:-:107072576:107080497	1	0	0	0
N/A	N/A	N/A	chr10:-:107200319:107204822	0	0	0	2
N/A	N/A	N/A	chr10:-:107209385:107214137	0	0	1	0
N/A	N/A	N/A	chr10:-:107218147:107218984	1	0	0	0
uc007gzc.1|uc007gzd.1|uc007gze.1	Ppp1r12a	17931	chr10:+:107689980:107696812	0	0	1	2
uc007gzf.1	Pawr	114774	chr10:+:107849124:107850724	0	0	0	1
N/A	N/A	N/A	chr10:-:10800654:10801967	1	1	0	0
uc007gzg.1|uc007gzh.1|uc007gzi.1	Syt1	20979	chr10:-:108339371:108430894	0	0	0	1
uc007gzg.1|uc007gzh.1|uc007gzi.1	Syt1	20979	chr10:-:108430973:108447632	0	0	1	1
uc007ejn.1|uc007ejo.1|uc007ejp.1|uc007ejq.1|uc007ejr.1|uc007ejs.1	Shprh	268281	chr10:+:10882025:10882607	4	5	0	0
uc007gzk.1|uc007gzl.1	Nav3	260315	chr10:-:109121295:109125842	0	1	0	0
N/A	N/A	N/A	chr10:+:10914172:10924979	0	1	0	0
uc007gzk.1|uc007gzl.1	Nav3	260315	chr10:-:109151463:109153576	0	0	2	0
uc007gzk.1|uc007gzl.1	Nav3	260315	chr10:-:109155422:109156122	1	1	0	0
uc007gzk.1|uc007gzl.1	Nav3	260315	chr10:-:109157134:109164887	0	1	0	0
uc007gzk.1|uc007gzl.1	Nav3	260315	chr10:-:109164998:109173975	2	2	0	0
uc007gzk.1|uc007gzl.1	Nav3	260315	chr10:-:109174058:109179657	1	2	0	0
uc007gzk.1|uc007gzl.1	Nav3	260315	chr10:-:109188540:109192006	0	0	0	1
uc007gzk.1|uc007gzl.1	Nav3	260315	chr10:-:109192194:109195945	0	0	0	1
uc007gzk.1|uc007gzl.1	Nav3	260315	chr10:-:109204693:109206218	0	0	2	1
uc007gzk.1|uc007gzl.1	Nav3	260315	chr10:-:109204693:109261629	0	0	1	0
uc007gzk.1|uc007gzl.1	Nav3	260315	chr10:-:109260675:109261629	1	0	0	0
uc007gzk.1|uc007gzl.1	Nav3	260315	chr10:-:109261737:109278759	0	1	0	0
N/A	N/A	N/A	chr10:-:109821170:109823298	0	0	0	2
N/A	N/A	N/A	chr10:-:109892021:109892706	0	0	0	1
uc007gzn.1|uc007gzo.1|uc007gzp.1	E2f7	52679	chr10:+:110218078:110219254	0	1	0	0
uc007gzt.1|uc007gzu.1|uc007gzv.1|uc007gzw.1	Zdhhc17	320150	chr10:-:110387739:110392120	1	0	0	0
N/A	N/A	N/A	chr10:-:110398193:110399353	0	0	0	1
uc007gzt.1|uc007gzu.1|uc007gzv.1|uc007gzw.1	Zdhhc17	320150	chr10:-:110399460:110404740	0	0	3	2
uc007gzt.1|uc007gzu.1|uc007gzv.1|uc007gzw.1	Zdhhc17	320150	chr10:-:110404861:110405485	0	0	1	1
N/A	N/A	N/A	chr10:-:110511483:110520419	1	0	0	0
N/A	N/A	N/A	chr10:+:110661764:110670618	0	2	0	0
uc007gzx.1|uc007gzy.1|uc007gzz.1	Osbpl8	237542	chr10:+:110713614:110719183	1	0	0	0
N/A	N/A	N/A	chr10:+:110896215:110918336	0	0	0	1
N/A	N/A	N/A	chr10:+:110910473:110918336	2	0	0	0
uc007haa.1|uc007hab.1|uc007hac.1|uc007had.1|uc007hae.1	Nap1l1	53605	chr10:+:110928193:110932381	0	0	0	1
N/A	N/A	N/A	chr10:+:110929214:110929900	1	0	0	0
uc007haa.1|uc007hab.1|uc007hac.1|uc007had.1|uc007hae.1	Nap1l1	53605	chr10:+:110930037:110930353	0	0	1	0
uc007haa.1|uc007hab.1|uc007hac.1|uc007had.1|uc007hae.1	Nap1l1	53605	chr10:+:110930037:110931227	0	0	1	0
uc007haa.1|uc007hab.1|uc007hac.1|uc007had.1|uc007hae.1	Nap1l1	53605	chr10:+:110930625:110931227	2	0	0	0
N/A	N/A	N/A	chr10:+:110933161:110937910	1	0	0	0
N/A	N/A	N/A	chr10:+:110933226:110933810	0	0	1	1
uc007haj.1	Glipr1	73690	chr10:-:111422738:111422834	0	0	0	4
uc007haj.1	Glipr1	73690	chr10:-:111425941:111430497	0	0	0	1
uc007haj.1	Glipr1	73690	chr10:-:111430736:111433914	0	0	2	2
uc007ham.1|uc007han.1	Caps2	353025	chr10:+:111602839:111612607	1	0	0	0
uc007ham.1|uc007han.1	Caps2	353025	chr10:+:111614845:111614939	0	0	0	2
uc007ham.1|uc007han.1	Caps2	353025	chr10:+:111616571:111619462	0	0	2	0
uc007ham.1|uc007han.1	Caps2	353025	chr10:+:111636816:111637738	0	0	0	1
uc007ham.1|uc007han.1	Caps2	353025	chr10:+:111641090:111645334	2	0	0	0
uc007ham.1|uc007han.1	Caps2	353025	chr10:+:111645459:111648153	0	0	1	0
N/A	N/A	N/A	chr10:+:111708368:111708743	0	0	1	0
uc007hao.1|uc007hap.1	Kcnc2	268345	chr10:+:111895710:111899021	2	0	0	0
uc007haq.1	AK005834	N/A	chr10:+:112219805:112222499	2	0	0	0
uc007hat.1|uc007hau.1|uc007hav.1	Trhde	237553	chr10:-:113845783:113881735	0	0	1	0
uc007hat.1|uc007hau.1|uc007hav.1	Trhde	237553	chr10:-:113883289:113885296	0	0	1	2
uc007hat.1|uc007hau.1|uc007hav.1	Trhde	237553	chr10:-:114025596:114029108	2	0	0	0
uc007hat.1|uc007hau.1|uc007hav.1	Trhde	237553	chr10:-:114225271:114237575	3	0	0	0
uc007haw.1	Tph2	216343	chr10:-:114583182:114588141	1	1	0	0
uc007haw.1	Tph2	216343	chr10:-:114616762:114619812	0	0	0	1
uc007hax.1|uc007hay.1	Tbc1d15	66687	chr10:-:114658741:114670176	0	1	0	0
uc007hax.1|uc007hay.1	Tbc1d15	66687	chr10:-:114670314:114677905	1	0	0	0
uc007hax.1|uc007hay.1	Tbc1d15	66687	chr10:-:114670314:114688438	0	0	0	1
uc007hba.1|uc007hbb.1|uc007hbc.1|uc007hbd.1	Tmem19	67226	chr10:-:114780963:114784702	0	0	1	0
uc007hba.1|uc007hbb.1|uc007hbc.1|uc007hbd.1	Tmem19	67226	chr10:-:114796823:114798963	0	0	0	1
uc007hba.1|uc007hbb.1|uc007hbc.1|uc007hbd.1	Tmem19	67226	chr10:-:114799015:114799121	0	0	0	1
N/A	N/A	N/A	chr10:-:114820942:114821261	0	0	1	1
uc007hbg.1|uc007hbh.1	Ccdc131	N/A	chr10:+:114835125:114837771	0	0	1	2
N/A	N/A	N/A	chr10:+:114840376:114841253	0	1	0	0
uc007hbg.1|uc007hbh.1	Ccdc131	N/A	chr10:+:114847759:114848255	0	0	1	2
uc007hbi.1|uc007hbj.1|uc007hbk.1	Lgr5	14160	chr10:-:114890157:114893704	0	0	0	1
uc007hbi.1|uc007hbj.1|uc007hbk.1	Lgr5	14160	chr10:-:114893849:114895697	0	0	1	0
uc007hbi.1|uc007hbj.1|uc007hbk.1	Lgr5	14160	chr10:-:114899823:114903186	0	1	0	0
N/A	N/A	N/A	chr10:-:114957733:115021933	0	1	0	0
N/A	N/A	N/A	chr10:+:115084613:115085048	0	0	0	1
uc007hbm.1|uc007hbn.1|uc007hbo.1	Tspan8	216350	chr10:+:115272222:115272332	0	0	0	1
N/A	N/A	N/A	chr10:-:115454346:115455549	0	0	1	1
uc007hbu.1|uc007hbv.1	Ptprb	19263	chr10:+:115751148:115752098	0	0	0	1
uc007hbu.1|uc007hbv.1	Ptprb	19263	chr10:+:115752355:115754422	1	0	0	0
uc007hbu.1|uc007hbv.1	Ptprb	19263	chr10:+:115775935:115776474	3	0	0	0
uc007hbu.1|uc007hbv.1	Ptprb	19263	chr10:+:115776737:115777947	0	0	1	0
uc007hbu.1|uc007hbv.1	Ptprb	19263	chr10:+:115778705:115780849	1	1	0	0
uc007hbu.1|uc007hbv.1	Ptprb	19263	chr10:+:115781112:115783855	1	0	0	0
uc007hbu.1|uc007hbv.1	Ptprb	19263	chr10:+:115784118:115784983	0	0	2	0
uc007hbu.1|uc007hbv.1	Ptprb	19263	chr10:+:115787300:115787822	0	0	0	1
uc007hbu.1|uc007hbv.1	Ptprb	19263	chr10:+:115791090:115794248	1	0	0	0
uc007hbu.1|uc007hbv.1	Ptprb	19263	chr10:+:115799483:115799580	1	0	0	0
uc007hbu.1|uc007hbv.1	Ptprb	19263	chr10:+:115801107:115804537	0	0	0	3
N/A	N/A	N/A	chr10:-:115880968:115883383	0	1	0	0
N/A	N/A	N/A	chr10:-:115896035:115896843	0	1	0	0
uc007hca.1|uc007hcb.1|uc007hcc.1|uc007hcd.1|uc007hce.1|uc007hcf.1	Cnot2	72068	chr10:-:115929492:115935142	0	0	0	1
uc007hca.1|uc007hcb.1|uc007hcc.1|uc007hcd.1|uc007hce.1|uc007hcf.1	Cnot2	72068	chr10:-:115938373:116018509	2	0	0	0
uc007hca.1|uc007hcb.1|uc007hcc.1|uc007hcd.1|uc007hce.1|uc007hcf.1	Cnot2	72068	chr10:-:115944244:115986089	0	0	0	1
uc007hca.1|uc007hcb.1|uc007hcc.1|uc007hcd.1|uc007hce.1|uc007hcf.1	Cnot2	72068	chr10:-:115944244:116018509	2	0	0	0
uc007hca.1|uc007hcb.1|uc007hcc.1|uc007hcd.1|uc007hce.1|uc007hcf.1	Cnot2	72068	chr10:-:115954439:115986089	0	0	0	2
uc007hca.1|uc007hcb.1|uc007hcc.1|uc007hcd.1|uc007hce.1|uc007hcf.1	Cnot2	72068	chr10:-:115965005:116018509	1	0	0	0
N/A	N/A	N/A	chr10:-:115974499:115986089	4	0	0	0
uc007hca.1|uc007hcb.1|uc007hcc.1|uc007hcd.1|uc007hce.1|uc007hcf.1	Cnot2	72068	chr10:-:115974504:115986089	2	4	0	0
uc007hca.1|uc007hcb.1|uc007hcc.1|uc007hcd.1|uc007hce.1|uc007hcf.1	Cnot2	72068	chr10:-:115986161:116018509	0	0	1	1
uc007hci.1	Gm239	237558	chr10:-:116213870:116214005	1	0	0	0
uc007hci.1	Gm239	237558	chr10:-:116219092:116220230	1	0	0	0
uc007hci.1	Gm239	237558	chr10:-:116232678:116232778	1	0	0	0
uc007hci.1	Gm239	237558	chr10:-:116232830:116233116	0	0	0	1
uc007hci.1	Gm239	237558	chr10:-:116254848:116259739	1	0	0	0
uc007hcj.1|uc007hck.1	Rab3ip	216363	chr10:-:116347250:116351153	1	0	0	0
N/A	N/A	N/A	chr10:-:116347433:116351153	0	1	0	0
uc007hcm.1|uc007hcn.1	AK084517	N/A	chr10:+:116387748:116391569	0	0	1	1
uc007hcm.1|uc007hcn.1	AK084517	N/A	chr10:+:116387748:116392584	0	0	2	1
N/A	N/A	N/A	chr10:+:116387833:116392584	0	1	0	0
uc007hcm.1|uc007hcn.1	AK084517	N/A	chr10:+:116391781:116392584	0	1	0	0
N/A	N/A	N/A	chr10:+:116396048:116399086	0	1	0	0
N/A	N/A	N/A	chr10:+:116396125:116399086	0	0	2	0
uc007hcp.1	Best3	382427	chr10:+:116439730:116440941	1	0	0	0
uc007hcp.1	Best3	382427	chr10:+:116444724:116445946	0	0	2	1
uc007hcs.1	Cct2	12461	chr10:-:116490213:116498354	0	0	1	0
uc007hct.1|uc007hcu.1	Frs2	327826	chr10:-:116522179:116585448	0	0	1	0
N/A	N/A	N/A	chr10:-:116533391:116536999	0	0	0	2
uc007hct.1|uc007hcu.1	Frs2	327826	chr10:-:116537023:116537682	0	0	1	0
N/A	N/A	N/A	chr10:-:116652886:116654268	0	0	1	0
uc007hdd.1|uc007hde.1|uc007hdf.1|uc007hdg.1	Cpsf6	432508	chr10:-:116786557:116792991	1	1	0	0
uc007hdd.1|uc007hde.1|uc007hdf.1|uc007hdg.1	Cpsf6	432508	chr10:-:116798416:116800031	1	0	0	0
uc007hdd.1|uc007hde.1|uc007hdf.1|uc007hdg.1	Cpsf6	432508	chr10:-:116805044:116813895	0	0	0	1
N/A	N/A	N/A	chr10:+:116830573:116832239	0	0	1	0
uc007hdi.1|uc007hdj.1|uc007hdk.1	Cpm	70574	chr10:+:117066583:117066777	0	3	0	0
N/A	N/A	N/A	chr10:+:117113138:117117019	0	1	0	0
uc007hdl.1|uc007hdm.1	Mdm2	17246	chr10:-:117142285:117147002	0	1	0	0
uc007hdn.1	Slc35e3	215436	chr10:-:117173289:117177568	0	0	0	1
N/A	N/A	N/A	chr10:-:117175968:117176611	0	0	0	1
N/A	N/A	N/A	chr10:-:117177967:117181937	1	0	0	0
uc007hdo.1|uc007hdp.1|uc007hdq.1	Nup107	103468	chr10:-:117227111:117227523	3	0	0	0
uc007hdr.1	Rap1b	215449	chr10:-:117252836:117261650	0	0	0	1
uc007hds.1|uc007hdt.1|uc007hdu.1	Mdm1	17245	chr10:+:117579018:117579906	1	2	0	0
uc007hds.1|uc007hdt.1|uc007hdu.1	Mdm1	17245	chr10:+:117584027:117585037	4	1	0	0
uc007hds.1|uc007hdt.1|uc007hdu.1	Mdm1	17245	chr10:+:117594426:117595358	2	1	0	0
uc007hds.1|uc007hdt.1|uc007hdu.1	Mdm1	17245	chr10:+:117596612:117596716	0	1	0	0
uc007hea.1	Dyrk2	69181	chr10:-:118298209:118305206	0	0	1	0
uc007hea.1	Dyrk2	69181	chr10:-:118305354:118305777	0	0	1	0
uc007heb.1|uc007hec.1	Cand1	71902	chr10:-:118640261:118653507	0	0	0	1
uc007heb.1|uc007hec.1	Cand1	71902	chr10:-:118643879:118645329	0	1	0	0
N/A	N/A	N/A	chr10:-:118827892:118836037	1	0	0	0
N/A	N/A	N/A	chr10:-:118851927:118855295	0	0	1	0
uc007heg.1|uc007heh.1|uc007hei.1|uc007hej.1|uc007hek.1|uc007hel.1|uc007hem.1|uc007heo.1|uc007hep.1|uc007heq.1	Grip1	74053	chr10:+:119256690:119334771	0	0	1	0
uc007heg.1|uc007heh.1|uc007hei.1|uc007hej.1|uc007hek.1|uc007hel.1|uc007hem.1|uc007heo.1|uc007hep.1|uc007heq.1	Grip1	74053	chr10:+:119334851:119366957	0	0	1	1
uc007heg.1|uc007heh.1|uc007hei.1|uc007hej.1|uc007hek.1|uc007hel.1|uc007hem.1|uc007heo.1|uc007hep.1|uc007heq.1	Grip1	74053	chr10:+:119487172:119491889	1	0	0	0
uc007her.1|uc007hes.1	Helb	117599	chr10:-:119528808:119529540	5	1	0	0
uc007her.1|uc007hes.1	Helb	117599	chr10:-:119531342:119532157	0	1	0	0
uc007her.1|uc007hes.1	Helb	117599	chr10:-:119540000:119542215	1	1	0	0
uc007het.1|uc007heu.1	Irak3	73914	chr10:-:119582866:119582954	0	0	0	2
uc007het.1|uc007heu.1	Irak3	73914	chr10:-:119583016:119583487	0	4	0	0
uc007het.1|uc007heu.1	Irak3	73914	chr10:-:119607438:119613287	0	0	0	1
uc007het.1|uc007heu.1	Irak3	73914	chr10:-:119615178:119615752	1	0	0	0
uc007hev.1	AK163103	N/A	chr10:+:119638905:119639158	2	0	0	0
uc007hew.1|uc007hex.1|uc007hey.1|uc007hez.1	Tmbim4	68212	chr10:+:119654665:119661676	2	0	0	0
N/A	N/A	N/A	chr10:+:119657840:119659048	1	0	0	0
N/A	N/A	N/A	chr10:+:119657840:119659095	1	0	0	0
N/A	N/A	N/A	chr10:+:119657840:119661690	2	0	0	0
uc007hfh.1	Msrb3	320183	chr10:-:120289148:120308091	0	3	0	0
N/A	N/A	N/A	chr10:-:120368900:120368984	0	1	0	0
uc007hfi.1	Lemd3	380664	chr10:-:120370765:120389274	0	0	1	0
uc007hfj.1|uc007hfk.1	Wif1	24117	chr10:+:120527262:120533055	0	0	0	1
N/A	N/A	N/A	chr10:-:120795701:120802201	0	1	0	0
N/A	N/A	N/A	chr10:-:120987761:120988307	1	1	0	0
uc007hfv.1	Xpot	73192	chr10:-:121027276:121030723	0	1	0	0
uc007hfv.1	Xpot	73192	chr10:-:121037963:121039287	0	0	0	1
uc007hfv.1	Xpot	73192	chr10:-:121040370:121041402	0	1	0	0
uc007hfv.1	Xpot	73192	chr10:-:121048768:121050279	0	1	0	0
uc007hfv.1	Xpot	73192	chr10:-:121054244:121056149	0	0	0	1
uc007hfw.1	D930020B18Rik	216393	chr10:+:121106286:121108765	0	1	0	0
uc007hga.1|uc007hgb.1|uc007hgc.1	Srgap1	117600	chr10:-:121260227:121262472	2	3	0	0
uc007hga.1|uc007hgb.1|uc007hgc.1	Srgap1	117600	chr10:-:121262549:121262690	2	4	0	0
uc007hga.1|uc007hgb.1|uc007hgc.1	Srgap1	117600	chr10:-:121262750:121265785	1	1	0	0
uc007ejw.1|uc007ejx.1|uc007ejy.1|uc007ejz.1|uc007eka.1|uc007ekb.1|uc007ekc.1|uc007ekd.1|uc007eke.1	Utrn	22288	chr10:-:12126392:12141395	0	0	0	1
uc007hga.1|uc007hgb.1|uc007hgc.1	Srgap1	117600	chr10:-:121333801:121362872	1	3	0	0
uc007hga.1|uc007hgb.1|uc007hgc.1	Srgap1	117600	chr10:-:121368565:121484183	1	1	0	0
uc007hgf.1|uc007hgg.1|uc007hgh.1	Ppm1h	319468	chr10:+:122315683:122357750	0	0	0	1
uc007hgf.1|uc007hgg.1|uc007hgh.1	Ppm1h	319468	chr10:+:122315683:122378281	0	0	0	1
uc007hgj.1|uc007hgk.1|uc007hgl.1	Mon2	67074	chr10:-:122439959:122460966	0	1	0	0
uc007hgj.1|uc007hgk.1|uc007hgl.1	Mon2	67074	chr10:-:122446986:122453319	1	0	0	0
uc007hgj.1|uc007hgk.1|uc007hgl.1	Mon2	67074	chr10:-:122463226:122463310	0	0	1	0
N/A	N/A	N/A	chr10:-:122556249:122558611	1	3	0	0
N/A	N/A	N/A	chr10:-:12258011:12332369	0	0	1	1
uc007hgm.1|uc007hgn.1|uc007hgo.1|uc007hgp.1|uc007hgq.1|uc007hgr.1|uc007hgs.1|uc007hgt.1	Usp15	14479	chr10:-:122583994:122605283	0	0	0	1
uc007hgm.1|uc007hgn.1|uc007hgo.1|uc007hgp.1|uc007hgq.1|uc007hgr.1|uc007hgs.1|uc007hgt.1	Usp15	14479	chr10:-:122583994:122633883	0	1	0	0
N/A	N/A	N/A	chr10:+:122634066:122636082	0	0	0	3
uc007ejw.1|uc007ejx.1|uc007ejy.1|uc007ejz.1|uc007eka.1|uc007ekb.1|uc007ekc.1|uc007ekd.1|uc007eke.1	Utrn	22288	chr10:-:12380727:12383164	2	3	0	0
uc007ejw.1|uc007ejx.1|uc007ejy.1|uc007ejz.1|uc007eka.1|uc007ekb.1|uc007ekc.1|uc007ekd.1|uc007eke.1	Utrn	22288	chr10:-:12384936:12386497	1	1	0	0
uc007ejw.1|uc007ejx.1|uc007ejy.1|uc007ejz.1|uc007eka.1|uc007ekb.1|uc007ekc.1|uc007ekd.1|uc007eke.1	Utrn	22288	chr10:-:12387456:12389454	0	1	0	0
uc007ejw.1|uc007ejx.1|uc007ejy.1|uc007ejz.1|uc007eka.1|uc007ekb.1|uc007ekc.1|uc007ekd.1|uc007eke.1	Utrn	22288	chr10:-:12400425:12402075	0	0	1	0
uc007ejw.1|uc007ejx.1|uc007ejy.1|uc007ejz.1|uc007eka.1|uc007ekb.1|uc007ekc.1|uc007ekd.1|uc007eke.1	Utrn	22288	chr10:-:12404369:12406130	0	1	0	0
uc007ejw.1|uc007ejx.1|uc007ejy.1|uc007ejz.1|uc007eka.1|uc007ekb.1|uc007ekc.1|uc007ekd.1|uc007eke.1	Utrn	22288	chr10:-:12406279:12408091	0	0	0	1
uc007ejw.1|uc007ejx.1|uc007ejy.1|uc007ejz.1|uc007eka.1|uc007ekb.1|uc007ekc.1|uc007ekd.1|uc007eke.1	Utrn	22288	chr10:-:12418913:12429764	2	0	0	0
uc007ejw.1|uc007ejx.1|uc007ejy.1|uc007ejz.1|uc007eka.1|uc007ekb.1|uc007ekc.1|uc007ekd.1|uc007eke.1	Utrn	22288	chr10:-:12429976:12431236	1	0	0	0
uc007ejw.1|uc007ejx.1|uc007ejy.1|uc007ejz.1|uc007eka.1|uc007ekb.1|uc007ekc.1|uc007ekd.1|uc007eke.1	Utrn	22288	chr10:-:12431381:12433052	1	1	0	0
uc007ejw.1|uc007ejx.1|uc007ejy.1|uc007ejz.1|uc007eka.1|uc007ekb.1|uc007ekc.1|uc007ekd.1|uc007eke.1	Utrn	22288	chr10:-:12433232:12433931	0	2	0	0
uc007ejw.1|uc007ejx.1|uc007ejy.1|uc007ejz.1|uc007eka.1|uc007ekb.1|uc007ekc.1|uc007ekd.1|uc007eke.1	Utrn	22288	chr10:-:12456900:12457883	0	0	0	1
uc007ejw.1|uc007ejx.1|uc007ejy.1|uc007ejz.1|uc007eka.1|uc007ekb.1|uc007ekc.1|uc007ekd.1|uc007eke.1	Utrn	22288	chr10:-:12458064:12459165	0	1	0	0
uc007ejw.1|uc007ejx.1|uc007ejy.1|uc007ejz.1|uc007eka.1|uc007ekb.1|uc007ekc.1|uc007ekd.1|uc007eke.1	Utrn	22288	chr10:-:12464003:12465030	0	1	0	0
uc007ejw.1|uc007ejx.1|uc007ejy.1|uc007ejz.1|uc007eka.1|uc007ekb.1|uc007ekc.1|uc007ekd.1|uc007eke.1	Utrn	22288	chr10:-:12465145:12467713	0	1	0	0
uc007hgx.1|uc007hgy.1|uc007hgz.1	Slc16a7	20503	chr10:-:124668460:124670498	0	1	0	0
uc007ejw.1|uc007ejx.1|uc007ejy.1|uc007ejz.1|uc007eka.1|uc007ekb.1|uc007ekc.1|uc007ekd.1|uc007eke.1	Utrn	22288	chr10:-:12467885:12469829	0	0	5	0
uc007ejw.1|uc007ejx.1|uc007ejy.1|uc007ejz.1|uc007eka.1|uc007ekb.1|uc007ekc.1|uc007ekd.1|uc007eke.1	Utrn	22288	chr10:-:12470340:12471293	1	1	0	0
N/A	N/A	N/A	chr10:-:124739137:124776195	0	0	0	1
N/A	N/A	N/A	chr10:-:124814634:124826343	0	0	1	1
uc007ejw.1|uc007ejx.1|uc007ejy.1|uc007ejz.1|uc007eka.1|uc007ekb.1|uc007ekc.1|uc007ekd.1|uc007eke.1	Utrn	22288	chr10:-:12485130:12581366	1	0	0	0
uc007hhb.1|uc007hhc.1|uc007hhd.1	Lrig3	320398	chr10:+:125409248:125409449	0	1	0	0
uc007hhb.1|uc007hhc.1|uc007hhd.1	Lrig3	320398	chr10:+:125409523:125431474	0	0	0	1
uc007hhb.1|uc007hhc.1|uc007hhd.1	Lrig3	320398	chr10:+:125432633:125433671	0	3	0	0
uc007hhb.1|uc007hhc.1|uc007hhd.1	Lrig3	320398	chr10:+:125433814:125434118	0	1	0	0
uc007hhb.1|uc007hhc.1|uc007hhd.1	Lrig3	320398	chr10:+:125434261:125434660	1	0	0	0
uc007hhb.1|uc007hhc.1|uc007hhd.1	Lrig3	320398	chr10:+:125434803:125436006	0	0	1	0
uc007hhb.1|uc007hhc.1|uc007hhd.1	Lrig3	320398	chr10:+:125437216:125439457	1	0	0	0
uc007hhb.1|uc007hhc.1|uc007hhd.1	Lrig3	320398	chr10:+:125440161:125443744	0	1	0	0
uc007hhb.1|uc007hhc.1|uc007hhd.1	Lrig3	320398	chr10:+:125445807:125446843	1	0	0	0
uc007hhb.1|uc007hhc.1|uc007hhd.1	Lrig3	320398	chr10:+:125447295:125447957	0	0	2	0
uc007hhb.1|uc007hhc.1|uc007hhd.1	Lrig3	320398	chr10:+:125450577:125451732	0	0	0	1
uc007ejw.1|uc007ejx.1|uc007ejy.1|uc007ejz.1|uc007eka.1|uc007ekb.1|uc007ekc.1|uc007ekd.1|uc007eke.1	Utrn	22288	chr10:-:12581533:12588553	0	1	0	0
N/A	N/A	N/A	chr10:-:126327796:126328696	1	0	0	0
uc007hhf.1|uc007hhg.1|uc007hhh.1	Xrcc6bp1	68876	chr10:-:126327887:126328696	0	0	0	2
uc007ekf.1	AK045519	N/A	chr10:-:12636869:12641407	0	0	0	1
uc007hhi.1	AK087024	N/A	chr10:+:126395201:126396370	0	0	0	1
uc007ekf.1	AK045519	N/A	chr10:-:12641515:12642164	0	0	0	1
uc007ekf.1	AK045519	N/A	chr10:-:12641515:12642372	0	0	2	0
uc007hhl.1	Avil	11567	chr10:+:126454088:126455442	0	0	2	0
uc007hhm.1|uc007hhn.1|uc007hho.1	Tsfm	66399	chr10:-:126462079:126466610	0	0	1	0
N/A	N/A	N/A	chr10:-:126467692:126478099	0	1	0	0
N/A	N/A	N/A	chr10:+:126479122:126480116	0	1	0	0
uc007hhs.1|uc007hht.1	Cyp27b1	13115	chr10:+:126486938:126487025	0	0	1	0
uc007hhs.1|uc007hht.1	Cyp27b1	13115	chr10:+:126487470:126487734	0	0	0	1
N/A	N/A	N/A	chr10:-:126505667:126505958	0	1	0	0
N/A	N/A	N/A	chr10:-:126506569:126506863	0	0	0	1
N/A	N/A	N/A	chr10:-:126508129:126516723	2	0	0	0
N/A	N/A	N/A	chr10:-:126533422:126533686	0	0	2	0
N/A	N/A	N/A	chr10:-:126545002:126556155	0	2	0	0
uc007hib.1|uc007hic.1|uc007hid.1|uc007hie.1|uc007hif.1|uc007hig.1	B4galnt1	14421	chr10:+:126602575:126607647	0	1	0	0
uc007hib.1|uc007hic.1|uc007hid.1|uc007hie.1|uc007hif.1|uc007hig.1	B4galnt1	14421	chr10:+:126603278:126604558	0	1	0	0
uc007hib.1|uc007hic.1|uc007hid.1|uc007hie.1|uc007hif.1|uc007hig.1	B4galnt1	14421	chr10:+:126604161:126606800	0	1	0	0
uc007hib.1|uc007hic.1|uc007hid.1|uc007hie.1|uc007hif.1|uc007hig.1	B4galnt1	14421	chr10:+:126604598:126607034	0	0	1	0
N/A	N/A	N/A	chr10:+:126604937:126605352	0	0	2	0
uc007hih.1	C78409	N/A	chr10:-:126610437:126610538	0	4	0	0
uc007hii.1	C78409	N/A	chr10:-:126611957:126612041	0	1	0	0
uc007hii.1	C78409	N/A	chr10:-:126614010:126614143	0	1	0	0
uc007hii.1	C78409	N/A	chr10:-:126614225:126614994	0	0	0	1
uc007hii.1	C78409	N/A	chr10:-:126615146:126615399	1	1	0	0
uc007hii.1	C78409	N/A	chr10:-:126615942:126616681	0	0	1	0
uc007hij.1|uc007hik.1	D10Ertd610e	52666	chr10:-:126621268:126621719	2	0	0	0
uc007hij.1|uc007hik.1	D10Ertd610e	52666	chr10:-:126626665:126626754	1	0	0	0
uc007hil.1|uc007him.1|uc007hin.1|uc007hio.1	Dtx3	80904	chr10:-:126628095:126630786	1	1	0	0
uc007hil.1|uc007him.1|uc007hin.1|uc007hio.1	Dtx3	80904	chr10:-:126631529:126632750	0	2	0	0
uc007hip.1	AK077682	N/A	chr10:+:126632580:126634193	0	2	0	0
uc007hip.1	AK077682	N/A	chr10:+:126634250:126637581	0	0	2	0
uc007hiq.1|uc007hir.1	Pip4k2c	117150	chr10:-:126636200:126636645	0	0	0	2
N/A	N/A	N/A	chr10:-:126642549:126642731	0	0	0	1
N/A	N/A	N/A	chr10:-:126648166:126648394	0	1	0	0
N/A	N/A	N/A	chr10:-:126667683:126667980	0	0	1	0
N/A	N/A	N/A	chr10:+:126672731:126673110	0	0	1	0
N/A	N/A	N/A	chr10:-:126693372:126699824	0	0	1	0
N/A	N/A	N/A	chr10:-:126701689:126703940	1	2	0	0
N/A	N/A	N/A	chr10:-:126701689:126704307	0	0	1	0
N/A	N/A	N/A	chr10:+:126704535:126711770	0	0	0	1
uc007hiu.1	Dctn2	69654	chr10:+:126712978:126715176	0	1	0	0
uc007hiu.1	Dctn2	69654	chr10:+:126712978:126718457	0	0	0	1
uc007hiu.1	Dctn2	69654	chr10:+:126713905:126718457	0	0	2	0
uc007hiu.1	Dctn2	69654	chr10:+:126714376:126718457	0	1	0	0
uc007hiu.1	Dctn2	69654	chr10:+:126715278:126718457	1	0	0	0
N/A	N/A	N/A	chr10:+:126715466:126718457	0	0	1	0
N/A	N/A	N/A	chr10:+:126715472:126718463	0	0	1	0
N/A	N/A	N/A	chr10:-:126719365:126719471	0	1	0	0
N/A	N/A	N/A	chr10:+:126732534:126732783	0	0	0	1
uc007hiz.1	Mars	216443	chr10:-:126739942:126742478	0	1	0	0
uc007hja.1|uc007hjb.1|uc007hjc.1|uc007hjd.1|uc007hje.1	Arhgap9	216445	chr10:+:126760886:126761401	0	0	2	0
N/A	N/A	N/A	chr10:+:126763297:126763369	2	0	0	0
uc007hja.1|uc007hjb.1|uc007hjc.1|uc007hjd.1|uc007hje.1	Arhgap9	216445	chr10:+:126763707:126763929	1	1	0	0
N/A	N/A	N/A	chr10:+:126763998:126764151	1	0	0	0
uc007hja.1|uc007hjb.1|uc007hjc.1|uc007hjd.1|uc007hje.1	Arhgap9	216445	chr10:+:126765203:126765934	0	1	0	0
uc007hjf.1|uc007hjg.1|uc007hjh.1	Gli1	14632	chr10:-:126768856:126769457	1	0	0	0
uc007hjf.1|uc007hjg.1|uc007hjh.1	Gli1	14632	chr10:-:126769721:126770624	0	0	0	1
uc007hjf.1|uc007hjg.1|uc007hjh.1	Gli1	14632	chr10:-:126773168:126773468	0	0	1	0
uc007hjf.1|uc007hjg.1|uc007hjh.1	Gli1	14632	chr10:-:126774213:126774446	0	0	0	1
uc007hjf.1|uc007hjg.1|uc007hjh.1	Gli1	14632	chr10:-:126774650:126775128	1	0	0	0
N/A	N/A	N/A	chr10:+:126880268:126881332	1	0	0	0
uc007hjl.1|uc007hjm.1|uc007hjn.1|uc007hjo.1|uc007hjp.1|uc007hjq.1	R3hdm2	71750	chr10:+:126896631:126899262	0	0	0	2
N/A	N/A	N/A	chr10:+:126906361:126908824	1	1	0	0
uc007hjl.1|uc007hjm.1|uc007hjn.1|uc007hjo.1|uc007hjp.1|uc007hjq.1	R3hdm2	71750	chr10:+:126909056:126921032	0	0	1	0
N/A	N/A	N/A	chr10:+:126913754:126918753	0	1	0	0
uc007hjr.1|uc007hjs.1	Stac3	237611	chr10:+:126940721:126940912	0	1	0	0
uc007hjr.1|uc007hjs.1	Stac3	237611	chr10:+:126940972:126941914	3	1	0	0
uc007hjr.1|uc007hjs.1	Stac3	237611	chr10:+:126942011:126944282	1	1	0	0
uc007hjr.1|uc007hjs.1	Stac3	237611	chr10:+:126944569:126944755	1	0	0	0
uc007hjr.1|uc007hjs.1	Stac3	237611	chr10:+:126944840:126945002	0	0	0	1
N/A	N/A	N/A	chr10:-:126956344:126956445	0	0	1	0
uc007hjx.1|uc007hjy.1|uc007hjz.1	Lrp1	16971	chr10:-:126976146:126992710	0	0	1	0
N/A	N/A	N/A	chr10:-:126985499:126985594	0	0	0	2
uc007hjx.1|uc007hjy.1|uc007hjz.1	Lrp1	16971	chr10:-:126989955:126991320	0	0	2	0
uc007hjx.1|uc007hjy.1|uc007hjz.1	Lrp1	16971	chr10:-:126994617:126995592	0	1	0	0
uc007hjx.1|uc007hjy.1|uc007hjz.1	Lrp1	16971	chr10:-:127029194:127030409	1	3	0	0
uc007hjx.1|uc007hjy.1|uc007hjz.1	Lrp1	16971	chr10:-:127032503:127042465	4	0	0	0
uc007hjx.1|uc007hjy.1|uc007hjz.1	Lrp1	16971	chr10:-:127042728:127042842	0	2	0	0
uc007hka.1	Stat6	20852	chr10:+:127080305:127083947	1	2	0	0
uc007hka.1	Stat6	20852	chr10:+:127085245:127087752	4	2	0	0
uc007hka.1	Stat6	20852	chr10:+:127087890:127088009	1	1	0	0
uc007hka.1	Stat6	20852	chr10:+:127090128:127090263	3	1	0	0
uc007hka.1	Stat6	20852	chr10:+:127092559:127093980	5	7	0	0
N/A	N/A	N/A	chr10:-:127109243:127109606	1	0	0	0
uc007hkd.1|uc007hke.1|uc007hkf.1|uc007hkg.1	AK005897	N/A	chr10:+:127125404:127126281	0	0	2	1
uc007hkd.1|uc007hke.1|uc007hkf.1|uc007hkg.1	AK005897	N/A	chr10:+:127130117:127130540	0	0	4	0
uc007hkd.1|uc007hke.1|uc007hkf.1|uc007hkg.1	AK005897	N/A	chr10:+:127131710:127132425	0	3	0	0
uc007hkh.1|uc007hki.1	Myo1a	432516	chr10:+:127147577:127147934	0	0	2	0
uc007hkh.1|uc007hki.1	Myo1a	432516	chr10:+:127148226:127149640	0	1	0	0
uc007hkh.1|uc007hki.1	Myo1a	432516	chr10:+:127149923:127150777	0	0	0	1
uc007hkh.1|uc007hki.1	Myo1a	432516	chr10:+:127150839:127151041	2	3	0	0
uc007hkh.1|uc007hki.1	Myo1a	432516	chr10:+:127151241:127151382	0	1	0	0
uc007hkh.1|uc007hki.1	Myo1a	432516	chr10:+:127152137:127152306	0	1	0	0
uc007hkh.1|uc007hki.1	Myo1a	432516	chr10:+:127153001:127153344	1	1	0	0
uc007hkh.1|uc007hki.1	Myo1a	432516	chr10:+:127153418:127155568	3	0	0	0
uc007hkh.1|uc007hki.1	Myo1a	432516	chr10:+:127155702:127156307	1	1	0	0
uc007hkh.1|uc007hki.1	Myo1a	432516	chr10:+:127157076:127157209	0	0	0	1
uc007hkj.1|uc007hkk.1	Tac2	21334	chr10:+:127163189:127165227	0	0	1	0
uc007hkj.1|uc007hkk.1	Tac2	21334	chr10:+:127165332:127165503	0	0	2	0
uc007hkj.1|uc007hkk.1	Tac2	21334	chr10:+:127165532:127166170	0	0	1	0
uc007hkj.1|uc007hkk.1	Tac2	21334	chr10:+:127166223:127166532	0	0	1	0
uc007hkl.1	Zbtb39	320080	chr10:+:127176718:127178571	2	1	0	0
uc007hkm.1	Admr	N/A	chr10:-:127188152:127188656	0	0	0	1
N/A	N/A	N/A	chr10:+:127456671:127457186	0	0	1	0
N/A	N/A	N/A	chr10:+:127460028:127460639	2	2	0	0
uc007hlb.1|uc007hlc.1	Naca	17938	chr10:+:127473616:127476227	0	0	2	2
uc007hlb.1|uc007hlc.1	Naca	17938	chr10:+:127485183:127485301	0	0	1	1
N/A	N/A	N/A	chr10:+:127512418:127513132	2	0	0	0
uc007hle.1	Atp5b	11947	chr10:+:127520509:127523354	0	0	1	0
uc007hle.1	Atp5b	11947	chr10:+:127521130:127522498	0	0	2	0
N/A	N/A	N/A	chr10:+:127521134:127521358	0	1	0	0
N/A	N/A	N/A	chr10:+:127522256:127522470	0	1	0	0
N/A	N/A	N/A	chr10:+:127522268:127522470	0	1	0	0
N/A	N/A	N/A	chr10:-:127522674:127525390	0	0	0	1
N/A	N/A	N/A	chr10:+:127525589:127526031	1	0	0	0
N/A	N/A	N/A	chr10:+:127526210:127527075	0	0	1	1
N/A	N/A	N/A	chr10:+:127528832:127529554	0	1	0	0
N/A	N/A	N/A	chr10:+:127528832:127533436	0	1	0	0
uc007hlf.1|uc007hlg.1|uc007hlh.1|uc007hli.1|uc007hlj.1|uc007hlk.1|uc007hll.1	Baz2a	116848	chr10:+:127533579:127545950	0	2	0	0
uc007hlf.1|uc007hlg.1|uc007hlh.1|uc007hli.1|uc007hlj.1|uc007hlk.1|uc007hll.1	Baz2a	116848	chr10:+:127546087:127547811	2	1	0	0
uc007hlf.1|uc007hlg.1|uc007hlh.1|uc007hli.1|uc007hlj.1|uc007hlk.1|uc007hll.1	Baz2a	116848	chr10:+:127549823:127550519	0	0	0	1
uc007hlm.1|uc007hln.1	Rbms2	56516	chr10:-:127580608:127617005	1	0	0	0
N/A	N/A	N/A	chr10:-:127613492:127613706	0	0	0	1
uc007hlo.1|uc007hlp.1	Gls2	216456	chr10:+:127637358:127638262	0	2	0	0
uc007hlo.1|uc007hlp.1	Gls2	216456	chr10:+:127638425:127640879	0	0	1	0
uc007hlo.1|uc007hlp.1	Gls2	216456	chr10:+:127644678:127646162	0	0	0	2
uc007hls.1	AK140919	N/A	chr10:-:127669711:127669804	0	0	1	0
uc007hlt.1|uc007hlu.1|uc007hlv.1|uc007hlw.1|uc007hlx.1	Timeless	21853	chr10:+:127677347:127677436	2	0	0	0
uc007hlt.1|uc007hlu.1|uc007hlv.1|uc007hlw.1|uc007hlx.1	Timeless	21853	chr10:+:127678432:127678640	1	1	0	0
uc007hlt.1|uc007hlu.1|uc007hlv.1|uc007hlw.1|uc007hlx.1	Timeless	21853	chr10:+:127678795:127679366	0	1	0	0
uc007hlt.1|uc007hlu.1|uc007hlv.1|uc007hlw.1|uc007hlx.1	Timeless	21853	chr10:+:127680427:127681126	0	3	0	0
uc007hlt.1|uc007hlu.1|uc007hlv.1|uc007hlw.1|uc007hlx.1	Timeless	21853	chr10:+:127681343:127681494	0	0	1	1
uc007hlt.1|uc007hlu.1|uc007hlv.1|uc007hlw.1|uc007hlx.1	Timeless	21853	chr10:+:127683516:127684209	0	0	1	0
uc007hlt.1|uc007hlu.1|uc007hlv.1|uc007hlw.1|uc007hlx.1	Timeless	21853	chr10:+:127684306:127684396	0	0	1	0
uc007hlt.1|uc007hlu.1|uc007hlv.1|uc007hlw.1|uc007hlx.1	Timeless	21853	chr10:+:127684833:127685418	0	0	1	1
uc007hlt.1|uc007hlu.1|uc007hlv.1|uc007hlw.1|uc007hlx.1	Timeless	21853	chr10:+:127686488:127686577	0	4	0	0
uc007hlt.1|uc007hlu.1|uc007hlv.1|uc007hlw.1|uc007hlx.1	Timeless	21853	chr10:+:127686697:127686784	0	1	0	0
uc007hlt.1|uc007hlu.1|uc007hlv.1|uc007hlw.1|uc007hlx.1	Timeless	21853	chr10:+:127687166:127687344	1	0	0	0
uc007hlt.1|uc007hlu.1|uc007hlv.1|uc007hlw.1|uc007hlx.1	Timeless	21853	chr10:+:127687868:127688726	1	1	0	0
uc007hlt.1|uc007hlu.1|uc007hlv.1|uc007hlw.1|uc007hlx.1	Timeless	21853	chr10:+:127689144:127689248	0	0	2	1
uc007hlt.1|uc007hlu.1|uc007hlv.1|uc007hlw.1|uc007hlx.1	Timeless	21853	chr10:+:127689144:127689251	0	0	1	0
uc007hma.1|uc007hmb.1	Stat2	20847	chr10:+:127718764:127719158	2	0	0	0
uc007hmc.1	Il23a	83430	chr10:-:127734280:127734546	0	0	0	1
uc007hmc.1	Il23a	83430	chr10:-:127734647:127734867	0	0	0	1
uc007hmd.1|uc007hme.1|uc007hmf.1|uc007hmg.1|uc007hmh.1	Usp52	N/A	chr10:+:127747856:127749934	0	0	0	2
uc007hmd.1|uc007hme.1|uc007hmf.1|uc007hmg.1|uc007hmh.1	Usp52	N/A	chr10:+:127755089:127756001	0	0	2	2
N/A	N/A	N/A	chr10:+:127759586:127760386	0	0	1	0
N/A	N/A	N/A	chr10:+:127759774:127760386	0	1	0	0
N/A	N/A	N/A	chr10:+:127760118:127760386	0	1	0	0
uc007hmi.1	Tmem4	N/A	chr10:+:127763323:127764074	0	0	0	1
uc007hmj.1	Cs	12974	chr10:+:127775015:127787489	0	0	3	0
N/A	N/A	N/A	chr10:-:127793025:127801461	0	0	1	0
uc007hmk.1	Coq10a	210582	chr10:-:127800847:127802079	0	0	0	1
uc007hmq.1	Obfc2b	69917	chr10:-:127845276:127845754	0	0	0	1
uc007hmq.1	Obfc2b	69917	chr10:-:127845453:127845754	0	0	1	0
N/A	N/A	N/A	chr10:-:127846404:127848034	0	0	1	0
N/A	N/A	N/A	chr10:+:127852357:127860275	0	0	1	2
uc007hmr.1|uc007hms.1|uc007hmt.1|uc007hmu.1|uc007hmv.1	Rnf41	67588	chr10:+:127852357:127872369	0	0	0	1
N/A	N/A	N/A	chr10:-:127872622:127873525	0	1	0	0
uc007hmw.1|uc007hmx.1|uc007hmy.1|uc007hmz.1	Smarcc2	68094	chr10:+:127900122:127925952	0	0	1	0
uc007hmw.1|uc007hmx.1|uc007hmy.1|uc007hmz.1	Smarcc2	68094	chr10:+:127918060:127919142	0	0	0	3
N/A	N/A	N/A	chr10:+:127921270:127921368	0	0	0	1
uc007hnb.1|uc007hnc.1|uc007hnd.1	Myl6	17904	chr10:-:127929458:127930595	1	0	0	0
N/A	N/A	N/A	chr10:-:127929460:127929661	0	0	0	1
N/A	N/A	N/A	chr10:-:127931539:127931622	2	1	0	0
N/A	N/A	N/A	chr10:-:127931562:127931646	0	0	0	2
N/A	N/A	N/A	chr10:-:127931718:127932105	0	0	0	1
N/A	N/A	N/A	chr10:-:127932283:127932995	1	0	0	0
N/A	N/A	N/A	chr10:-:127934412:127935684	0	0	1	1
N/A	N/A	N/A	chr10:+:127936582:127938436	0	0	3	0
uc007hng.1|uc007hnh.1	Mbc2	N/A	chr10:-:127949520:127955984	0	2	0	0
uc007hng.1|uc007hnh.1	Mbc2	N/A	chr10:-:127953296:127953589	1	0	0	0
N/A	N/A	N/A	chr10:-:127956386:127956484	0	1	0	0
N/A	N/A	N/A	chr10:-:127986027:127986144	0	0	0	2
uc007hnm.1	Erbb3	13867	chr10:-:128006950:128007110	1	0	0	0
uc007hnm.1	Erbb3	13867	chr10:-:128010000:128010231	4	3	0	0
uc007hnm.1	Erbb3	13867	chr10:-:128010587:128011395	0	0	2	1
uc007hnm.1	Erbb3	13867	chr10:-:128014071:128014260	1	0	0	0
uc007hnm.1	Erbb3	13867	chr10:-:128016148:128016552	0	0	2	0
uc007hnm.1	Erbb3	13867	chr10:-:128019159:128020173	0	0	1	1
uc007hnm.1	Erbb3	13867	chr10:-:128020314:128020422	0	1	0	0
uc007hnm.1	Erbb3	13867	chr10:-:128020758:128021367	0	1	0	0
uc007hnm.1	Erbb3	13867	chr10:-:128022254:128023196	0	0	0	1
uc007hnn.1|uc007hno.1	Rps26	27370	chr10:-:128061692:128063119	0	0	1	0
uc007hnp.1|uc007hnq.1	Ikzf4	22781	chr10:-:128073846:128077197	1	0	0	0
uc007hnp.1|uc007hnq.1	Ikzf4	22781	chr10:-:128077364:128078109	1	0	0	0
uc007hnp.1|uc007hnq.1	Ikzf4	22781	chr10:-:128078369:128079685	0	0	1	0
uc007ekj.1|uc007ekk.1|uc007ekl.1|uc007ekm.1|uc007ekn.1	Plagl1	22634	chr10:+:12810830:12811581	0	0	0	1
uc007ekj.1|uc007ekk.1|uc007ekl.1|uc007ekm.1|uc007ekn.1	Plagl1	22634	chr10:+:12810830:12825661	1	1	0	0
N/A	N/A	N/A	chr10:-:128116696:128118442	0	0	4	0
N/A	N/A	N/A	chr10:-:128118535:128119875	0	3	0	0
uc007hnu.1|uc007hnv.1|uc007hnw.1|uc007hnx.1	Rab5b	19344	chr10:-:128118535:128123804	0	0	0	1
uc007hny.1|uc007hnz.1|uc007hoa.1	Cdk2	12566	chr10:-:128136266:128136528	0	0	1	1
uc007hny.1|uc007hnz.1|uc007hoa.1	Cdk2	12566	chr10:-:128136731:128138399	0	0	1	0
uc007hob.1	Si	20431	chr10:+:128151484:128152277	0	1	0	0
uc007hob.1	Si	20431	chr10:+:128152744:128152983	0	1	0	0
uc007hob.1	Si	20431	chr10:+:128153606:128154807	0	1	0	0
uc007hob.1	Si	20431	chr10:+:128155859:128155956	0	0	2	1
uc007hoc.1	Dgka	13139	chr10:-:128168243:128170039	1	0	0	0
uc007hoc.1	Dgka	13139	chr10:-:128173332:128174065	1	0	0	0
N/A	N/A	N/A	chr10:-:128174200:128174595	3	0	0	0
uc007hof.1|uc007hog.1|uc007hoh.1	Mmp19	58223	chr10:+:128231712:128231876	0	0	1	0
uc007hof.1|uc007hog.1|uc007hoh.1	Mmp19	58223	chr10:+:128232091:128232616	2	0	0	0
uc007hof.1|uc007hog.1|uc007hoh.1	Mmp19	58223	chr10:+:128235347:128235492	0	0	1	0
uc007hoi.1|uc007hoj.1	1110012D08Rik	73827	chr10:-:128240413:128240862	0	0	2	1
uc007hoi.1|uc007hoj.1	1110012D08Rik	73827	chr10:-:128240413:128241289	0	0	1	0
uc007hok.1|uc007hol.1|uc007hom.1|uc007hon.1	Dnajc14	74330	chr10:+:128242770:128243224	0	0	1	4
uc007hoq.1|uc007hor.1|uc007hos.1	1110005A23Rik	N/A	chr10:+:128259027:128275503	0	0	0	1
uc007hoq.1|uc007hor.1|uc007hos.1	1110005A23Rik	N/A	chr10:+:128261887:128275500	1	0	0	0
uc007hoq.1|uc007hor.1|uc007hos.1	1110005A23Rik	N/A	chr10:+:128270467:128283588	0	1	0	0
N/A	N/A	N/A	chr10:+:128283639:128285295	0	0	0	1
uc007hoq.1|uc007hor.1|uc007hos.1	1110005A23Rik	N/A	chr10:+:128288238:128288794	0	1	0	0
uc007hoq.1|uc007hor.1|uc007hos.1	1110005A23Rik	N/A	chr10:+:128288988:128290239	0	0	0	1
N/A	N/A	N/A	chr10:-:128309543:128320202	1	1	0	0
uc007ekj.1|uc007ekk.1|uc007ekl.1|uc007ekm.1|uc007ekn.1	Plagl1	22634	chr10:+:12832356:12833964	1	0	0	0
uc007ekj.1|uc007ekk.1|uc007ekl.1|uc007ekm.1|uc007ekn.1	Plagl1	22634	chr10:+:12834026:12836502	1	0	0	0
uc007ekj.1|uc007ekk.1|uc007ekl.1|uc007ekm.1|uc007ekn.1	Plagl1	22634	chr10:+:12834026:12836516	0	1	0	0
uc007hou.1|uc007hov.1	Cd63	12512	chr10:+:128349357:128349494	0	0	0	1
uc007hou.1|uc007hov.1	Cd63	12512	chr10:+:128349577:128349731	0	1	0	0
N/A	N/A	N/A	chr10:-:128350998:128351191	0	1	0	0
uc007how.1|uc007hox.1|uc007hoy.1	Rdh5	19682	chr10:-:128355194:128355309	1	1	0	0
uc007how.1|uc007hox.1|uc007hoy.1	Rdh5	19682	chr10:-:128355653:128356203	2	1	0	0
N/A	N/A	N/A	chr10:-:128359782:128360984	0	1	0	0
uc007hpa.1|uc007hpb.1|uc007hpc.1	Itga7	16404	chr10:+:128377993:128379864	0	1	0	0
uc007hpa.1|uc007hpb.1|uc007hpc.1	Itga7	16404	chr10:+:128380934:128394677	0	0	0	1
uc007hpa.1|uc007hpb.1|uc007hpc.1	Itga7	16404	chr10:+:128391127:128393667	3	0	0	0
uc007ekj.1|uc007ekk.1|uc007ekl.1|uc007ekm.1|uc007ekn.1	Plagl1	22634	chr10:+:12844974:12846948	5	1	0	0
uc007ekj.1|uc007ekk.1|uc007ekl.1|uc007ekm.1|uc007ekn.1	Plagl1	22634	chr10:+:12848802:12849432	0	0	1	1
uc007ekp.1	Ltv1	353258	chr10:-:12899129:12899801	0	1	0	0
uc007ekq.1|uc007ekr.1|uc007eks.1|uc007ekt.1	Phactr2	215789	chr10:-:12973685:12975116	1	2	0	0
uc009vac.1	EG623734	N/A	chr10:-:129858600:129863436	0	0	1	0
uc007ekq.1|uc007ekr.1|uc007eks.1|uc007ekt.1	Phactr2	215789	chr10:-:13011768:13043870	3	2	0	0
uc007ekq.1|uc007ekr.1|uc007eks.1|uc007ekt.1	Phactr2	215789	chr10:-:13011768:13193862	1	0	0	0
uc007eku.1|uc007ekv.1|uc007ekw.1	Fuca2	66848	chr10:+:13225884:13227041	0	0	1	1
uc007ekx.1|uc007eky.1|uc007ekz.1	Pex3	56535	chr10:-:13243749:13247547	0	0	0	1
uc007elb.1|uc007elc.1|uc007eld.1|uc007ele.1	Aig1	66253	chr10:-:13373555:13549049	0	0	0	1
uc007elg.1|uc007elh.1|uc007eli.1|uc007elj.1	Hivep2	15273	chr10:+:13686503:13724007	0	1	0	0
uc007elg.1|uc007elh.1|uc007eli.1|uc007elj.1	Hivep2	15273	chr10:+:13686503:13786389	0	0	2	0
uc007elg.1|uc007elh.1|uc007eli.1|uc007elj.1	Hivep2	15273	chr10:+:13786490:13837325	1	0	0	0
uc007elg.1|uc007elh.1|uc007eli.1|uc007elj.1	Hivep2	15273	chr10:+:13786490:13846258	0	2	0	0
uc007elg.1|uc007elh.1|uc007eli.1|uc007elj.1	Hivep2	15273	chr10:+:13786490:13859191	0	0	0	1
uc007elg.1|uc007elh.1|uc007eli.1|uc007elj.1	Hivep2	15273	chr10:+:13846302:13847099	3	0	0	0
N/A	N/A	N/A	chr10:-:13935189:13935293	0	0	1	0
uc007elk.1	Gpr126	215798	chr10:-:14130363:14140232	0	0	1	0
uc007elk.1	Gpr126	215798	chr10:-:14148023:14151412	0	0	0	1
uc007elk.1	Gpr126	215798	chr10:-:14156726:14158226	1	0	0	0
uc007ell.1|uc007elm.1	Vta1	66201	chr10:-:14375651:14387738	0	0	0	1
uc007ell.1|uc007elm.1	Vta1	66201	chr10:-:14387914:14403870	0	0	0	1
uc007eln.1	AK006045	N/A	chr10:+:14425479:14454609	0	0	3	0
N/A	N/A	N/A	chr10:+:14454718:14486483	0	0	0	1
N/A	N/A	N/A	chr10:+:14465113:14465373	2	1	0	0
N/A	N/A	N/A	chr10:-:14465150:14465242	0	0	1	0
N/A	N/A	N/A	chr10:-:14465150:14465560	0	0	2	0
N/A	N/A	N/A	chr10:-:14465404:14465487	2	0	0	0
N/A	N/A	N/A	chr10:-:14465425:14465531	0	0	4	3
N/A	N/A	N/A	chr10:+:14466028:14466325	0	0	0	1
N/A	N/A	N/A	chr10:-:14466168:14466593	0	1	0	0
N/A	N/A	N/A	chr10:-:14466453:14466885	0	0	0	1
N/A	N/A	N/A	chr10:+:14466639:14466707	0	1	0	0
uc007elp.1	Nmbr	18101	chr10:+:14480516:14486483	1	2	0	0
uc007elv.1	Txlnb	378431	chr10:+:17526662:17535035	1	1	0	0
uc007elv.1	Txlnb	378431	chr10:+:17535205:17547598	0	0	0	1
uc007elv.1	Txlnb	378431	chr10:+:17547792:17550042	0	0	1	0
uc007elv.1	Txlnb	378431	chr10:+:17550161:17553084	0	0	0	1
uc007elv.1	Txlnb	378431	chr10:+:17553158:17558714	3	1	0	0
uc007elv.1	Txlnb	378431	chr10:+:17558806:17561232	0	0	1	0
uc007elv.1	Txlnb	378431	chr10:+:17561327:17562504	1	1	0	0
uc007elw.1	Heca	380629	chr10:-:17627994:17667315	0	0	0	1
uc007ema.1|uc007emb.1|uc007emc.1	Reps1	19707	chr10:+:17775921:17812651	1	0	0	0
uc007ema.1|uc007emb.1|uc007emc.1	Reps1	19707	chr10:+:17775921:17834205	0	0	0	1
uc007ema.1|uc007emb.1|uc007emc.1	Reps1	19707	chr10:+:17814714:17823960	0	1	0	0
uc007ema.1|uc007emb.1|uc007emc.1	Reps1	19707	chr10:+:17816142:17834205	0	1	0	0
uc007ema.1|uc007emb.1|uc007emc.1	Reps1	19707	chr10:+:17841024:17842831	0	0	1	0
uc007emg.1|uc007emh.1|uc007emi.1|uc007emj.1	Nhsl1	215819	chr10:+:18128320:18138522	0	2	0	0
uc007emg.1|uc007emh.1|uc007emi.1|uc007emj.1	Nhsl1	215819	chr10:+:18217963:18231356	0	0	1	0
uc007emg.1|uc007emh.1|uc007emi.1|uc007emj.1	Nhsl1	215819	chr10:+:18231548:18235835	0	1	0	0
uc007emg.1|uc007emh.1|uc007emi.1|uc007emj.1	Nhsl1	215819	chr10:+:18231548:18243597	1	0	0	0
N/A	N/A	N/A	chr10:-:18265015:18265500	0	3	0	0
uc007emn.1|uc007emo.1	D10Bwg1379e	215821	chr10:-:18331132:18332944	0	0	2	0
uc007emn.1|uc007emo.1	D10Bwg1379e	215821	chr10:-:18366865:18367610	0	0	2	0
uc007emn.1|uc007emo.1	D10Bwg1379e	215821	chr10:-:18372673:18374016	1	0	0	0
uc007emn.1|uc007emo.1	D10Bwg1379e	215821	chr10:-:18381194:18384697	0	1	0	0
uc007emn.1|uc007emo.1	D10Bwg1379e	215821	chr10:-:18384819:18397631	0	0	1	1
uc007emn.1|uc007emo.1	D10Bwg1379e	215821	chr10:-:18397699:18416359	1	0	0	0
uc007emn.1|uc007emo.1	D10Bwg1379e	215821	chr10:-:18416490:18419135	0	0	1	0
uc007emp.1	AK139076	N/A	chr10:+:18463690:18481147	0	0	2	0
uc007emp.1	AK139076	N/A	chr10:+:18503494:18557293	1	0	0	0
uc007emp.1	AK139076	N/A	chr10:+:18551299:18557293	0	0	2	1
uc007ena.1|uc007enb.1	Tnfaip3	21929	chr10:-:18726839:18726988	0	0	0	1
uc007ena.1|uc007enb.1	Tnfaip3	21929	chr10:-:18727135:18727951	2	0	0	0
uc007ena.1|uc007enb.1	Tnfaip3	21929	chr10:-:18731596:18734959	0	2	0	0
uc007enh.1	Il22ra2	237310	chr10:+:19351589:19352575	0	0	0	1
uc007eni.1	Il20ra	237313	chr10:+:19469192:19470448	0	0	0	2
uc007eni.1	Il20ra	237313	chr10:+:19471393:19475592	2	0	0	0
N/A	N/A	N/A	chr10:-:19512905:19513603	2	0	0	0
N/A	N/A	N/A	chr10:-:19513768:19546520	0	0	1	0
N/A	N/A	N/A	chr10:-:19568477:19568840	0	1	0	0
N/A	N/A	N/A	chr10:-:19569475:19569634	0	0	2	3
uc007enl.1	Pex7	18634	chr10:-:19589199:19624369	0	1	0	0
uc007enl.1	Pex7	18634	chr10:-:19614164:19624369	0	2	0	0
N/A	N/A	N/A	chr10:+:19824071:19825082	0	0	1	0
uc007enm.1	Map3k5	26408	chr10:+:19830701:19837951	0	1	0	0
uc007enm.1	Map3k5	26408	chr10:+:19858181:19861329	0	0	2	0
uc007enn.1|uc007eno.1|uc007enr.1	Mtap7	17761	chr10:+:19868886:19950590	0	1	0	0
uc007enn.1|uc007eno.1|uc007enr.1	Mtap7	17761	chr10:+:19966521:19976990	0	1	0	0
N/A	N/A	N/A	chr10:+:19970286:19981641	0	0	1	0
N/A	N/A	N/A	chr10:+:19977103:19981641	2	3	0	0
uc007enn.1|uc007eno.1|uc007enr.1	Mtap7	17761	chr10:+:19977103:19986542	1	0	0	0
uc007enn.1|uc007eno.1|uc007enr.1	Mtap7	17761	chr10:+:19996081:19999802	0	0	2	0
N/A	N/A	N/A	chr10:+:20045905:20046970	0	0	1	1
N/A	N/A	N/A	chr10:+:20047197:20047908	0	0	0	2
N/A	N/A	N/A	chr10:+:20048013:20049119	0	0	0	1
uc007ent.1|uc007enu.1|uc007env.1|uc007enw.1|uc007enx.1	Bclaf1	72567	chr10:+:20059727:20063864	0	0	1	0
uc007eny.1|uc007enz.1	2610016C23Rik	N/A	chr10:+:20072734:20073173	0	0	0	1
uc007eny.1|uc007enz.1	2610016C23Rik	N/A	chr10:+:20074071:20077061	2	1	0	0
uc007eoa.1|uc007eob.1|uc007eoc.1	Pde7b	29863	chr10:-:20163175:20338936	0	0	0	1
uc007eoa.1|uc007eob.1|uc007eoc.1	Pde7b	29863	chr10:-:20199564:20444482	0	1	0	0
N/A	N/A	N/A	chr10:+:20662159:20668559	0	0	2	0
N/A	N/A	N/A	chr10:+:20720511:20727561	0	1	0	0
uc007eod.1|uc007eoe.1|uc007eof.1	Ahi1	52906	chr10:+:20778056:20790094	2	1	0	0
uc007eog.1|uc007eoh.1|uc007eoi.1|uc007eoj.1	Myb	17863	chr10:-:20846095:20859099	0	2	0	0
uc007eog.1|uc007eoh.1|uc007eoi.1|uc007eoj.1	Myb	17863	chr10:-:20859206:20860373	0	0	0	1
uc007eog.1|uc007eoh.1|uc007eoi.1|uc007eoj.1	Myb	17863	chr10:-:20860483:20861565	1	3	0	0
uc007eog.1|uc007eoh.1|uc007eoi.1|uc007eoj.1	Myb	17863	chr10:-:20861690:20861778	1	0	0	0
uc007eog.1|uc007eoh.1|uc007eoi.1|uc007eoj.1	Myb	17863	chr10:-:20861892:20862768	0	0	1	0
uc007eog.1|uc007eoh.1|uc007eoi.1|uc007eoj.1	Myb	17863	chr10:-:20862898:20865992	0	1	0	0
N/A	N/A	N/A	chr10:+:20865167:20865960	0	3	0	0
N/A	N/A	N/A	chr10:+:20866101:20872332	1	0	0	0
uc007eog.1|uc007eoh.1|uc007eoi.1|uc007eoj.1	Myb	17863	chr10:-:20868664:20870112	0	1	0	0
N/A	N/A	N/A	chr10:+:21015982:21018965	3	0	0	0
uc007eol.1|uc007eom.1|uc007eon.1|uc007eoo.1|uc007eop.1	Hbs1l	56422	chr10:+:21015982:21024336	0	1	0	0
uc007eol.1|uc007eom.1|uc007eon.1|uc007eoo.1|uc007eop.1	Hbs1l	56422	chr10:+:21024449:21071733	1	0	0	0
uc007eol.1|uc007eom.1|uc007eon.1|uc007eoo.1|uc007eop.1	Hbs1l	56422	chr10:+:21027585:21071733	0	1	0	0
uc007eol.1|uc007eom.1|uc007eon.1|uc007eoo.1|uc007eop.1	Hbs1l	56422	chr10:+:21029120:21056773	0	2	0	0
uc007eol.1|uc007eom.1|uc007eon.1|uc007eoo.1|uc007eop.1	Hbs1l	56422	chr10:+:21078646:21087448	0	0	1	0
uc007eou.1|uc007eov.1|uc007eow.1|uc007eox.1	Sgk	N/A	chr10:+:21602513:21689255	1	0	0	0
N/A	N/A	N/A	chr10:+:21602651:21648148	1	0	0	0
uc007epj.1	AK145180	N/A	chr10:+:22005682:22005946	0	0	0	1
uc007epj.1	AK145180	N/A	chr10:+:22006209:22006860	0	0	1	0
uc007epo.1	Slc2a12	353169	chr10:+:22385512:22411941	1	0	0	0
uc007epp.1|uc007epq.1	Tbpl1	237336	chr10:-:22427680:22429163	0	0	0	1
uc007ept.1|uc007epu.1	Eya4	14051	chr10:-:22826094:22829777	2	1	0	0
uc007ept.1|uc007epu.1	Eya4	14051	chr10:-:22833830:22836359	2	1	0	0
uc007ept.1|uc007epu.1	Eya4	14051	chr10:-:22836519:22836626	0	1	0	0
uc007ept.1|uc007epu.1	Eya4	14051	chr10:-:22843747:22857997	0	1	0	0
uc007ept.1|uc007epu.1	Eya4	14051	chr10:-:22859903:22871738	2	0	0	0
uc007ept.1|uc007epu.1	Eya4	14051	chr10:-:22871903:22875726	0	1	0	0
uc007ept.1|uc007epu.1	Eya4	14051	chr10:-:22883292:22892805	0	0	0	1
uc007ept.1|uc007epu.1	Eya4	14051	chr10:-:22892929:22946608	0	2	0	0
uc007ept.1|uc007epu.1	Eya4	14051	chr10:-:22946657:23042854	0	2	0	0
uc007ept.1|uc007epu.1	Eya4	14051	chr10:-:23042952:23069568	1	1	0	0
uc007eqb.1	Vnn3	26464	chr10:+:23571602:23571713	0	0	1	0
uc007eqb.1	Vnn3	26464	chr10:+:23584435:23585434	0	0	0	1
uc007eqc.1	Vnn1	22361	chr10:+:23619491:23620391	2	0	0	0
uc007eqc.1	Vnn1	22361	chr10:+:23623362:23624284	0	1	0	0
uc007equ.1	Moxd1	59012	chr10:+:23964192:23972269	1	1	0	0
uc007equ.1	Moxd1	59012	chr10:+:23999351:23999649	0	0	0	1
uc007equ.1	Moxd1	59012	chr10:+:24004621:24006813	0	0	0	1
uc007equ.1	Moxd1	59012	chr10:+:24006955:24019962	0	1	0	0
N/A	N/A	N/A	chr10:-:24145217:24299914	0	0	2	0
N/A	N/A	N/A	chr10:-:24239856:24240400	0	0	1	0
N/A	N/A	N/A	chr10:-:24269393:24299914	1	2	0	0
N/A	N/A	N/A	chr10:-:24278349:24299914	0	0	4	0
N/A	N/A	N/A	chr10:-:24303103:24315447	3	0	0	0
N/A	N/A	N/A	chr10:-:24315225:24315447	0	0	1	0
uc007eqx.1|uc007eqy.1|uc007eqz.1	Enpp1	18605	chr10:-:24367091:24367823	0	3	0	0
uc007eqx.1|uc007eqy.1|uc007eqz.1	Enpp1	18605	chr10:-:24375678:24376911	0	0	0	1
uc007eqx.1|uc007eqy.1|uc007eqz.1	Enpp1	18605	chr10:-:24377038:24377645	0	0	0	2
uc007eqx.1|uc007eqy.1|uc007eqz.1	Enpp1	18605	chr10:-:24377676:24379956	0	0	0	1
uc007eqx.1|uc007eqy.1|uc007eqz.1	Enpp1	18605	chr10:-:24381781:24384361	0	2	0	0
uc007eqx.1|uc007eqy.1|uc007eqz.1	Enpp1	18605	chr10:-:24384433:24384717	5	1	0	0
uc007eqx.1|uc007eqy.1|uc007eqz.1	Enpp1	18605	chr10:-:24384782:24388815	1	0	0	0
uc007eqx.1|uc007eqy.1|uc007eqz.1	Enpp1	18605	chr10:-:24389605:24389749	0	0	0	2
uc007eqx.1|uc007eqy.1|uc007eqz.1	Enpp1	18605	chr10:-:24389828:24391821	0	0	0	1
uc007eqx.1|uc007eqy.1|uc007eqz.1	Enpp1	18605	chr10:-:24391918:24394421	0	1	0	0
uc007eqx.1|uc007eqy.1|uc007eqz.1	Enpp1	18605	chr10:-:24394481:24395784	0	0	1	0
uc007eqx.1|uc007eqy.1|uc007eqz.1	Enpp1	18605	chr10:-:24397835:24398994	0	0	0	1
uc007era.1|uc007erb.1|uc007erc.1	Enpp3	209558	chr10:-:24497777:24498499	0	0	0	1
uc007era.1|uc007erb.1|uc007erc.1	Enpp3	209558	chr10:-:24498631:24504596	0	0	1	0
uc007era.1|uc007erb.1|uc007erc.1	Enpp3	209558	chr10:-:24507703:24511795	2	0	0	0
uc007era.1|uc007erb.1|uc007erc.1	Enpp3	209558	chr10:-:24524277:24525675	0	0	1	0
uc007era.1|uc007erb.1|uc007erc.1	Enpp3	209558	chr10:-:24544734:24545982	2	0	0	0
uc007erd.1|uc007ere.1|uc007erf.1	Med23	70208	chr10:+:24602455:24603010	0	0	1	0
uc007erd.1|uc007ere.1|uc007erf.1	Med23	70208	chr10:+:24603027:24608206	0	0	0	2
uc007erd.1|uc007ere.1|uc007erf.1	Med23	70208	chr10:+:24629724:24632469	0	1	0	0
uc007erg.1	Arg1	11846	chr10:-:24636675:24637719	0	0	1	0
N/A	N/A	N/A	chr10:-:24958957:24959432	4	0	0	0
uc007erk.1|uc007erl.1|uc007erm.1|uc007ern.2|uc007erp.1|uc007erq.1|uc007err.1|uc007ers.1|uc007ert.1|uc007eru.1	Epb4.1l2	13822	chr10:+:25208899:25213373	0	1	0	0
uc007erk.1|uc007erl.1|uc007erm.1|uc007ern.2|uc007erp.1|uc007erq.1|uc007err.1|uc007ers.1|uc007ert.1|uc007eru.1	Epb4.1l2	13822	chr10:+:25208899:25221384	0	1	0	0
uc007erk.1|uc007erl.1|uc007erm.1|uc007ern.2|uc007erp.1|uc007erq.1|uc007err.1|uc007ers.1|uc007ert.1|uc007eru.1	Epb4.1l2	13822	chr10:+:25208899:25221630	0	0	3	1
N/A	N/A	N/A	chr10:+:25213133:25213373	0	0	0	1
uc007erk.1|uc007erl.1|uc007erm.1|uc007ern.2|uc007erp.1|uc007erq.1|uc007err.1|uc007ers.1|uc007ert.1|uc007eru.1	Epb4.1l2	13822	chr10:+:25213435:25215251	0	2	0	0
uc007erk.1|uc007erl.1|uc007erm.1|uc007ern.2|uc007erp.1|uc007erq.1|uc007err.1|uc007ers.1|uc007ert.1|uc007eru.1	Epb4.1l2	13822	chr10:+:25215397:25219582	3	0	0	0
uc007erk.1|uc007erl.1|uc007erm.1|uc007ern.2|uc007erp.1|uc007erq.1|uc007err.1|uc007ers.1|uc007ert.1|uc007eru.1	Epb4.1l2	13822	chr10:+:25215397:25221384	2	0	0	0
uc007erk.1|uc007erl.1|uc007erm.1|uc007ern.2|uc007erp.1|uc007erq.1|uc007err.1|uc007ers.1|uc007ert.1|uc007eru.1	Epb4.1l2	13822	chr10:+:25221717:25221812	0	1	0	0
uc007erk.1|uc007erl.1|uc007erm.1|uc007ern.2|uc007erp.1|uc007erq.1|uc007err.1|uc007ers.1|uc007ert.1|uc007eru.1	Epb4.1l2	13822	chr10:+:25222193:25227583	0	0	1	0
uc007erk.1|uc007erl.1|uc007erm.1|uc007ern.2|uc007erp.1|uc007erq.1|uc007err.1|uc007ers.1|uc007ert.1|uc007eru.1	Epb4.1l2	13822	chr10:+:25227663:25242103	0	1	0	0
uc007esa.1|uc007esb.1|uc007esc.1|uc007esd.1	L3mbtl3	237339	chr10:-:26051761:26056039	0	0	4	2
uc007esa.1|uc007esb.1|uc007esc.1|uc007esd.1	L3mbtl3	237339	chr10:-:26062473:26063983	3	0	0	0
uc007esa.1|uc007esb.1|uc007esc.1|uc007esd.1	L3mbtl3	237339	chr10:-:26062473:26064418	2	0	0	0
uc007esa.1|uc007esb.1|uc007esc.1|uc007esd.1	L3mbtl3	237339	chr10:-:26072181:26093507	0	0	1	0
uc007esa.1|uc007esb.1|uc007esc.1|uc007esd.1	L3mbtl3	237339	chr10:-:26072181:26095717	0	0	1	0
N/A	N/A	N/A	chr10:+:26415565:26565738	0	0	0	1
N/A	N/A	N/A	chr10:+:26463609:26466631	3	1	0	0
uc007ese.1	Arhgap18	73910	chr10:+:26592570:26596963	1	0	0	0
uc007ese.1	Arhgap18	73910	chr10:+:26609678:26636199	0	1	0	0
uc007esf.1|uc007esg.1|uc007esh.1|uc007esi.1	Lama2	16773	chr10:-:26735361:26738213	2	0	0	0
uc007esf.1|uc007esg.1|uc007esh.1|uc007esi.1	Lama2	16773	chr10:-:26738333:26743078	0	0	0	1
uc007esf.1|uc007esg.1|uc007esh.1|uc007esi.1	Lama2	16773	chr10:-:26750120:26750827	0	2	0	0
uc007esf.1|uc007esg.1|uc007esh.1|uc007esi.1	Lama2	16773	chr10:-:26755887:26760879	2	1	0	0
uc007esf.1|uc007esg.1|uc007esh.1|uc007esi.1	Lama2	16773	chr10:-:26763478:26764241	2	1	0	0
uc007esf.1|uc007esg.1|uc007esh.1|uc007esi.1	Lama2	16773	chr10:-:26764384:26770004	4	0	0	0
uc007esf.1|uc007esg.1|uc007esh.1|uc007esi.1	Lama2	16773	chr10:-:26790174:26821135	0	0	1	0
uc007esf.1|uc007esg.1|uc007esh.1|uc007esi.1	Lama2	16773	chr10:-:26825029:26838285	3	0	0	0
uc007esf.1|uc007esg.1|uc007esh.1|uc007esi.1	Lama2	16773	chr10:-:26838495:26839714	0	0	1	0
uc007esf.1|uc007esg.1|uc007esh.1|uc007esi.1	Lama2	16773	chr10:-:26844383:26853773	1	0	0	0
uc007esf.1|uc007esg.1|uc007esh.1|uc007esi.1	Lama2	16773	chr10:-:26853871:26858669	2	0	0	0
uc007esf.1|uc007esg.1|uc007esh.1|uc007esi.1	Lama2	16773	chr10:-:26884832:26896469	0	1	0	0
uc007esf.1|uc007esg.1|uc007esh.1|uc007esi.1	Lama2	16773	chr10:-:26908246:26908930	0	1	0	0
uc007esf.1|uc007esg.1|uc007esh.1|uc007esi.1	Lama2	16773	chr10:-:26917240:26924607	0	2	0	0
uc007esj.1|uc007esk.1|uc007esl.1|uc007esm.1|uc007esn.1	Ptprk	19272	chr10:+:27794983:27925940	1	0	0	0
uc007esj.1|uc007esk.1|uc007esl.1|uc007esm.1|uc007esn.1	Ptprk	19272	chr10:+:27983578:28054282	0	0	0	1
uc007esj.1|uc007esk.1|uc007esl.1|uc007esm.1|uc007esn.1	Ptprk	19272	chr10:+:28056343:28074411	0	2	0	0
uc007esj.1|uc007esk.1|uc007esl.1|uc007esm.1|uc007esn.1	Ptprk	19272	chr10:+:28185866:28192754	0	0	0	2
uc007esj.1|uc007esk.1|uc007esl.1|uc007esm.1|uc007esn.1	Ptprk	19272	chr10:+:28212993:28216715	0	0	0	1
uc007esj.1|uc007esk.1|uc007esl.1|uc007esm.1|uc007esn.1	Ptprk	19272	chr10:+:28216751:28271424	0	3	0	0
uc007esj.1|uc007esk.1|uc007esl.1|uc007esm.1|uc007esn.1	Ptprk	19272	chr10:+:28289779:28289980	0	0	4	0
uc007esj.1|uc007esk.1|uc007esl.1|uc007esm.1|uc007esn.1	Ptprk	19272	chr10:+:28289779:28293174	0	1	0	0
uc007esj.1|uc007esk.1|uc007esl.1|uc007esm.1|uc007esn.1	Ptprk	19272	chr10:+:28295512:28300199	0	0	3	0
uc007esr.1|uc007ess.1	2310057J18Rik	67719	chr10:-:28693894:28701292	0	0	1	0
N/A	N/A	N/A	chr10:-:28864218:28866375	0	0	2	0
uc007est.1|uc007esu.1	6330407J23Rik	67412	chr10:+:28864241:28918751	0	0	1	0
N/A	N/A	N/A	chr10:+:28867559:28867975	0	0	1	0
uc007esv.1	AK034141	N/A	chr10:+:28943211:28944041	1	1	0	0
N/A	N/A	N/A	chr10:+:29054077:29054272	3	3	0	0
N/A	N/A	N/A	chr10:-:29067689:29074144	1	0	0	0
N/A	N/A	N/A	chr10:-:29074248:29081091	1	0	0	0
N/A	N/A	N/A	chr10:-:29081151:29081790	4	3	0	0
uc007ete.1|uc007etf.1	Trmt11	73681	chr10:-:30286312:30309831	1	0	0	0
uc007eth.1|uc007eti.1|uc007etj.1|uc007etk.1|uc007etl.1|uc007etm.1|uc007etn.1|uc007eto.1	Ncoa7	211329	chr10:-:30367457:30368251	1	0	0	0
uc007eth.1|uc007eti.1|uc007etj.1|uc007etk.1|uc007etl.1|uc007etm.1|uc007etn.1|uc007eto.1	Ncoa7	211329	chr10:-:30415999:30421725	0	2	0	0
uc007eth.1|uc007eti.1|uc007etj.1|uc007etk.1|uc007etl.1|uc007etm.1|uc007etn.1|uc007eto.1	Ncoa7	211329	chr10:-:30421832:30442452	2	0	0	0
uc007eth.1|uc007eti.1|uc007etj.1|uc007etk.1|uc007etl.1|uc007etm.1|uc007etn.1|uc007eto.1	Ncoa7	211329	chr10:-:30442672:30522635	0	0	0	1
N/A	N/A	N/A	chr10:-:30483704:30491526	0	1	0	0
N/A	N/A	N/A	chr10:+:31040142:31041345	0	2	0	0
N/A	N/A	N/A	chr10:+:31043067:31045828	0	0	2	0
uc007etr.1|uc007ets.1|uc007ett.1	Tpd52l1	21987	chr10:-:31060984:31099021	0	1	0	0
uc007etr.1|uc007ets.1|uc007ett.1	Tpd52l1	21987	chr10:-:31066518:31165518	1	0	0	0
N/A	N/A	N/A	chr10:-:31411493:31413440	1	1	0	0
uc007etv.1|uc007etw.1|uc007etx.1|uc007ety.1	Tcba1	N/A	chr10:-:31466368:32609449	0	0	2	0
uc007etv.1|uc007etw.1|uc007etx.1|uc007ety.1	Tcba1	N/A	chr10:-:31671125:32122042	0	0	0	1
uc007etv.1|uc007etw.1|uc007etx.1|uc007ety.1	Tcba1	N/A	chr10:-:31671125:32609449	0	0	0	1
uc007efb.1|uc007efc.1	Cnksr3	215748	chr10:+:3203580:3206103	0	1	0	0
uc007etv.1|uc007etw.1|uc007etx.1|uc007ety.1	Tcba1	N/A	chr10:-:32049651:32609449	0	0	1	0
uc007efb.1|uc007efc.1	Cnksr3	215748	chr10:+:3217518:3219698	0	1	0	0
uc007efe.1|uc007eff.1|uc007efg.1|uc007efh.1|uc007efi.1|uc007efj.1|uc007efk.1|uc007efl.1|uc007efm.1|uc007efn.1|uc007efo.1|uc007efp.1|uc007efq.1|uc007eft.1|uc007efu.1|uc007efw.1|uc007efx.1|uc007efy.1|uc007efz.1|uc007ega.1|uc007egb.1|uc007egc.1|uc007egd.1|uc007ege.1|uc007egf.1	Oprm1	18390	chr10:-:3309383:3332435	0	1	0	0
uc007eud.1	AK036470	N/A	chr10:+:33165264:33166794	1	0	0	0
uc007eue.1|uc007euf.1	Rlbp1l2	N/A	chr10:-:33248349:33315550	0	0	2	1
uc007eue.1|uc007euf.1	Rlbp1l2	N/A	chr10:-:33315724:33342350	0	0	1	1
uc007euh.1	Rshl3	N/A	chr10:+:33625644:33627873	0	1	0	0
uc007euh.1	Rshl3	N/A	chr10:+:33632885:33634142	0	0	0	1
uc007eui.1|uc007euj.1|uc007euk.1|uc007eul.1|uc007eum.1	2700019D07Rik	N/A	chr10:-:33639181:33647309	1	1	0	0
uc007eui.1|uc007euj.1|uc007euk.1|uc007eul.1|uc007eum.1	2700019D07Rik	N/A	chr10:-:33650150:33659964	1	0	0	0
uc007efd.1|uc007efr.1|uc007efs.1|uc007efv.1	A130090K04Rik	N/A	chr10:+:3366294:3366858	1	0	0	0
uc007efe.1|uc007eff.1|uc007efg.1|uc007efh.1|uc007efi.1|uc007efj.1|uc007efk.1|uc007efl.1|uc007efm.1|uc007efn.1|uc007efo.1|uc007efp.1|uc007efq.1|uc007eft.1|uc007efu.1|uc007efw.1|uc007efx.1|uc007efy.1|uc007efz.1|uc007ega.1|uc007egb.1|uc007egc.1|uc007egd.1|uc007ege.1|uc007egf.1	Oprm1	18390	chr10:-:3366925:3516044	0	2	0	0
uc007eun.1	Rwdd1	66521	chr10:-:33716654:33720943	0	0	1	0
N/A	N/A	N/A	chr10:-:33837193:33846065	0	0	0	1
N/A	N/A	N/A	chr10:-:33858624:33875715	0	1	0	0
N/A	N/A	N/A	chr10:-:34003203:34018382	0	0	1	0
N/A	N/A	N/A	chr10:+:34018125:34020716	0	0	1	4
uc007euv.1|uc007euw.1	Nt5dc1	319638	chr10:-:34033547:34034556	0	0	0	1
uc007euv.1|uc007euw.1	Nt5dc1	319638	chr10:-:34034674:34042415	0	2	0	0
uc007euv.1|uc007euw.1	Nt5dc1	319638	chr10:-:34044268:34117920	0	0	1	0
uc007euv.1|uc007euw.1	Nt5dc1	319638	chr10:-:34044268:34119544	1	0	0	0
N/A	N/A	N/A	chr10:-:34097846:34119544	0	0	0	2
uc007euv.1|uc007euw.1	Nt5dc1	319638	chr10:-:34118001:34119544	0	1	0	0
uc007euv.1|uc007euw.1	Nt5dc1	319638	chr10:-:34131265:34138167	0	2	0	0
uc007euy.1|uc007euz.1|uc007eva.1|uc007evb.1	Frk	14302	chr10:+:34311776:34325501	0	0	0	1
uc007efe.1|uc007eff.1|uc007efg.1|uc007efh.1|uc007efi.1|uc007efj.1|uc007efk.1|uc007efl.1|uc007efm.1|uc007efn.1|uc007efo.1|uc007efp.1|uc007efq.1|uc007eft.1|uc007efu.1|uc007efw.1|uc007efx.1|uc007efy.1|uc007efz.1|uc007ega.1|uc007egb.1|uc007egc.1|uc007egd.1|uc007ege.1|uc007egf.1	Oprm1	18390	chr10:-:3517656:3587851	0	1	0	0
uc007evc.1|uc007evd.1	Hs3st5	319415	chr10:+:36348216:36548477	0	0	0	3
uc007evc.1|uc007evd.1	Hs3st5	319415	chr10:+:36421840:36552384	2	0	0	0
N/A	N/A	N/A	chr10:+:36695141:36704933	1	0	0	0
uc007eve.1|uc007evf.1	Hdac2	15182	chr10:+:36705045:36707886	0	0	1	1
uc007eve.1|uc007evf.1	Hdac2	15182	chr10:+:36709094:36713414	0	0	2	0
N/A	N/A	N/A	chr10:+:36713690:36716813	0	0	0	1
uc007evl.1|uc007evm.1|uc007evn.1|uc007evo.1|uc007evp.1|uc007evq.1	Lama4	16775	chr10:+:38685955:38725218	0	1	0	0
uc007evl.1|uc007evm.1|uc007evn.1|uc007evo.1|uc007evp.1|uc007evq.1	Lama4	16775	chr10:+:38730928:38737127	0	0	1	0
uc007evl.1|uc007evm.1|uc007evn.1|uc007evo.1|uc007evp.1|uc007evq.1	Lama4	16775	chr10:+:38737207:38746341	1	0	0	0
uc007evl.1|uc007evm.1|uc007evn.1|uc007evo.1|uc007evp.1|uc007evq.1	Lama4	16775	chr10:+:38762498:38765459	0	1	0	0
uc007evl.1|uc007evm.1|uc007evn.1|uc007evo.1|uc007evp.1|uc007evq.1	Lama4	16775	chr10:+:38781256:38785410	0	0	0	1
uc007evl.1|uc007evm.1|uc007evn.1|uc007evo.1|uc007evp.1|uc007evq.1	Lama4	16775	chr10:+:38795333:38798526	0	0	2	0
uc007evl.1|uc007evm.1|uc007evn.1|uc007evo.1|uc007evp.1|uc007evq.1	Lama4	16775	chr10:+:38798657:38800288	0	0	0	1
uc007evl.1|uc007evm.1|uc007evn.1|uc007evo.1|uc007evp.1|uc007evq.1	Lama4	16775	chr10:+:38802672:38803075	0	2	0	0
uc007evl.1|uc007evm.1|uc007evn.1|uc007evo.1|uc007evp.1|uc007evq.1	Lama4	16775	chr10:+:38808257:38808565	0	0	0	1
uc007evl.1|uc007evm.1|uc007evn.1|uc007evo.1|uc007evp.1|uc007evq.1	Lama4	16775	chr10:+:38814890:38816889	0	0	1	0
uc007evl.1|uc007evm.1|uc007evn.1|uc007evo.1|uc007evp.1|uc007evq.1	Lama4	16775	chr10:+:38817044:38818133	4	0	0	0
uc007evl.1|uc007evm.1|uc007evn.1|uc007evo.1|uc007evp.1|uc007evq.1	Lama4	16775	chr10:+:38818292:38823294	0	1	0	0
uc007evl.1|uc007evm.1|uc007evn.1|uc007evo.1|uc007evp.1|uc007evq.1	Lama4	16775	chr10:+:38825887:38829694	0	0	1	0
uc007evr.1|uc007evs.1	1700025K23Rik	66337	chr10:-:38838840:38852053	0	4	0	0
N/A	N/A	N/A	chr10:-:38840202:38840388	1	0	0	0
N/A	N/A	N/A	chr10:+:38878441:38879464	1	0	0	0
N/A	N/A	N/A	chr10:-:39088411:39089054	0	0	2	0
uc007evx.1|uc007evy.1|uc007evz.1	Fyn	14360	chr10:+:39246736:39249725	0	0	0	1
N/A	N/A	N/A	chr10:+:39253139:39253440	0	1	0	0
uc007ewb.1	AK164126	N/A	chr10:-:39342533:39401279	0	1	0	0
N/A	N/A	N/A	chr10:-:39357144:39359370	0	7	0	0
N/A	N/A	N/A	chr10:-:39360317:39401279	0	0	2	1
N/A	N/A	N/A	chr10:-:39365614:39374328	0	0	1	1
N/A	N/A	N/A	chr10:+:39370786:39370897	0	0	1	0
N/A	N/A	N/A	chr10:-:39374494:39401279	0	0	1	2
uc007ewc.1|uc007ewd.1|uc007ewe.1	Rev3l	19714	chr10:+:39452419:39462497	1	0	0	0
uc007ewc.1|uc007ewd.1|uc007ewe.1	Rev3l	19714	chr10:+:39510649:39514670	0	2	0	0
uc007ewc.1|uc007ewd.1|uc007ewe.1	Rev3l	19714	chr10:+:39519783:39524758	0	1	0	0
uc007ewc.1|uc007ewd.1|uc007ewe.1	Rev3l	19714	chr10:+:39525510:39526468	0	1	0	0
uc007ewc.1|uc007ewd.1|uc007ewe.1	Rev3l	19714	chr10:+:39537185:39540254	0	0	1	0
uc007ewc.1|uc007ewd.1|uc007ewe.1	Rev3l	19714	chr10:+:39540396:39540912	0	1	0	0
uc007ewc.1|uc007ewd.1|uc007ewe.1	Rev3l	19714	chr10:+:39556543:39558248	3	3	0	0
uc007ewc.1|uc007ewd.1|uc007ewe.1	Rev3l	19714	chr10:+:39574614:39582500	0	0	0	1
uc007ewf.1|uc007ewg.1	AK166420	N/A	chr10:+:39619335:39626812	0	2	0	0
uc007ewh.1	2010001E11Rik	72045	chr10:-:39641997:39643545	1	1	0	0
N/A	N/A	N/A	chr10:-:39670591:39676408	0	0	0	1
uc007ewl.1	AI317395	215929	chr10:-:39723395:39725784	2	0	0	0
uc007ewl.1	AI317395	215929	chr10:-:39725900:39727066	1	0	0	0
uc007ewl.1	AI317395	215929	chr10:-:39727234:39744699	0	0	2	0
uc007ewm.1|uc007ewn.1	Slc16a10	72472	chr10:-:39760633:39776293	0	2	0	0
uc007ewm.1|uc007ewn.1	Slc16a10	72472	chr10:-:39776436:39796370	1	1	0	0
uc007ewo.1|uc007ewp.1	Bxdc1	N/A	chr10:-:39956010:39964391	1	0	0	0
N/A	N/A	N/A	chr10:-:39977099:39977372	0	1	0	0
uc007ewt.1|uc007ewu.1|uc007ewv.1|uc007eww.1|uc007ewx.1|uc007ewy.1	mKIAA1028	N/A	chr10:+:40156018:40173821	0	0	2	1
uc007ewt.1|uc007ewu.1|uc007ewv.1|uc007eww.1|uc007ewx.1|uc007ewy.1	mKIAA1028	N/A	chr10:+:40156018:40186444	0	0	1	0
N/A	N/A	N/A	chr10:+:40657665:40658009	1	0	0	0
uc007exk.1	Fig4	103199	chr10:-:40908505:40960311	1	0	0	0
uc007exk.1	Fig4	103199	chr10:-:40948108:40974650	0	1	0	0
uc007exk.1	Fig4	103199	chr10:-:40949896:40960311	0	0	1	0
uc007exn.1|uc007exo.1|uc007exp.1|uc007exq.1|uc007exr.1	Mical1	171580	chr10:+:41198441:41198769	0	1	0	0
uc007exu.1	AK013818	N/A	chr10:+:41214420:41218168	0	0	1	5
uc007exv.1	Cd164	53599	chr10:+:41243951:41248478	0	4	0	0
uc007exw.1|uc007exx.1	5033413D22Rik	N/A	chr10:-:41259110:41259227	0	0	2	0
uc007exw.1|uc007exx.1	5033413D22Rik	N/A	chr10:-:41259348:41270528	2	0	0	0
uc007exw.1|uc007exx.1	5033413D22Rik	N/A	chr10:-:41270737:41273222	0	0	0	1
uc007exw.1|uc007exx.1	5033413D22Rik	N/A	chr10:-:41275946:41276571	0	0	0	1
uc007exw.1|uc007exx.1	5033413D22Rik	N/A	chr10:-:41276624:41289649	0	1	0	0
uc007exz.1|uc007eya.1|uc007eyb.1|uc007eyc.1	2410017P07Rik	103268	chr10:-:41450921:41529594	0	1	0	0
N/A	N/A	N/A	chr10:-:41465727:41529652	0	0	0	1
uc007eyg.1|uc007eyh.1	Armc2	213402	chr10:-:41642088:41642372	1	0	0	0
uc007eyg.1|uc007eyh.1	Armc2	213402	chr10:-:41642504:41643554	0	1	0	0
uc007eyg.1|uc007eyh.1	Armc2	213402	chr10:-:41643667:41644217	0	0	3	0
uc007eyg.1|uc007eyh.1	Armc2	213402	chr10:-:41646906:41667702	0	1	0	0
uc007eyg.1|uc007eyh.1	Armc2	213402	chr10:-:41667801:41671407	0	1	0	0
uc007eyg.1|uc007eyh.1	Armc2	213402	chr10:-:41671552:41683445	0	1	0	0
uc007eyg.1|uc007eyh.1	Armc2	213402	chr10:-:41691006:41695165	0	1	0	0
uc007eyg.1|uc007eyh.1	Armc2	213402	chr10:-:41700403:41712845	0	2	0	0
N/A	N/A	N/A	chr10:-:41720304:41723660	0	0	0	2
uc007eyi.1	Armc2	213402	chr10:-:41720304:41731574	0	0	2	0
uc007eyi.1	Armc2	213402	chr10:-:41720304:41737999	0	0	1	0
uc007eyl.1|uc007eym.1|uc007eyn.1|uc007eyo.1|uc007eyp.1	Foxo3a	N/A	chr10:-:41967592:41994622	2	0	0	0
N/A	N/A	N/A	chr10:+:41999259:42001724	0	0	0	1
uc007eyq.1	Lace1	215951	chr10:-:42080053:42174113	0	0	1	0
uc007eyq.1	Lace1	215951	chr10:-:42135454:42174113	1	0	0	0
uc007eyq.1	Lace1	215951	chr10:-:42146393:42198069	0	1	0	0
uc007eyr.1	Snx3	54198	chr10:+:42222298:42252955	0	0	2	0
uc007eyr.1	Snx3	54198	chr10:+:42245855:42254459	0	0	2	0
uc007eyu.1|uc007eyv.1	Ostm1	14628	chr10:+:42412814:42417914	0	1	0	0
N/A	N/A	N/A	chr10:+:42420381:42437406	0	0	1	0
uc007eyx.1|uc007eyy.1|uc007eyz.1	Sec63	140740	chr10:+:42517539:42534861	0	1	0	0
uc007eyx.1|uc007eyy.1|uc007eyz.1	Sec63	140740	chr10:+:42523788:42524886	0	0	1	0
uc007ezc.1	AK145144	N/A	chr10:-:42583884:42584159	0	0	0	2
N/A	N/A	N/A	chr10:+:42584559:42599620	1	0	0	0
uc007eza.1|uc007ezb.1|uc007ezd.1|uc007eze.1	Scml4	268297	chr10:+:42627601:42631823	0	1	0	0
uc007eza.1|uc007ezb.1|uc007ezd.1|uc007eze.1	Scml4	268297	chr10:+:42627601:42666675	0	1	0	0
uc007eza.1|uc007ezb.1|uc007ezd.1|uc007eze.1	Scml4	268297	chr10:+:42643989:42650210	0	1	0	0
uc007eza.1|uc007ezb.1|uc007ezd.1|uc007eze.1	Scml4	268297	chr10:+:42650410:42654759	0	0	1	0
uc007ezf.1|uc007ezg.1	Sobp	109205	chr10:-:42724220:42847585	0	0	1	0
uc007ezf.1|uc007ezg.1	Sobp	109205	chr10:-:42742724:42877714	2	0	0	0
N/A	N/A	N/A	chr10:-:42893328:42893782	1	0	0	0
uc007ezh.1|uc007ezi.1	Pdss2	71365	chr10:+:43092015:43115367	0	0	1	0
uc007ezh.1|uc007ezi.1	Pdss2	71365	chr10:+:43092015:43159605	0	0	0	1
N/A	N/A	N/A	chr10:-:43250468:43252482	0	0	2	1
N/A	N/A	N/A	chr10:-:43253261:43257538	2	0	0	0
N/A	N/A	N/A	chr10:+:43298611:43299030	1	0	0	0
N/A	N/A	N/A	chr10:-:43596483:43601323	0	0	0	1
uc007ezn.1|uc007ezo.1	Qrsl1	76563	chr10:-:43608942:43615240	0	1	0	0
uc007ezn.1|uc007ezo.1	Qrsl1	76563	chr10:-:43608942:43615815	1	0	0	0
uc007ezp.1	Rtn4ip1	170728	chr10:+:43652352:43666227	0	0	1	0
uc007ezq.1	Aim1	11630	chr10:-:43671763:43676455	0	1	0	0
uc007ezq.1	Aim1	11630	chr10:-:43676617:43678054	0	1	0	0
uc007ezq.1	Aim1	11630	chr10:-:43681374:43684384	0	0	0	1
uc007ezq.1	Aim1	11630	chr10:-:43687303:43687495	1	1	0	0
uc007ezq.1	Aim1	11630	chr10:-:43687621:43693464	0	2	0	0
uc007ezq.1	Aim1	11630	chr10:-:43693609:43693700	0	1	0	0
uc007ezq.1	Aim1	11630	chr10:-:43694990:43696604	0	0	1	0
uc007ezq.1	Aim1	11630	chr10:-:43699413:43706057	0	1	0	0
uc007ezq.1	Aim1	11630	chr10:-:43709059:43712261	0	1	0	0
N/A	N/A	N/A	chr10:+:43991247:44005838	0	0	0	1
uc007ezt.1	Atg5	11793	chr10:+:44006003:44014402	0	1	0	0
uc007ezt.1	Atg5	11793	chr10:+:44009796:44066763	0	0	1	0
N/A	N/A	N/A	chr10:+:4424706:4483879	1	0	0	0
N/A	N/A	N/A	chr10:+:44867927:44868112	0	0	0	1
N/A	N/A	N/A	chr10:-:45006663:45009029	0	0	0	1
uc007ezz.1	Bves	23828	chr10:+:45073723:45074557	1	0	0	0
uc007ezz.1	Bves	23828	chr10:+:45074698:45088997	0	1	0	0
uc007faa.1|uc007fab.1|uc007fac.1	Lin28b	380669	chr10:-:45101237:45138943	0	0	1	1
uc007faa.1|uc007fab.1|uc007fac.1	Lin28b	380669	chr10:-:45140514:45188843	0	0	1	0
N/A	N/A	N/A	chr10:-:45189381:45189857	0	1	0	0
N/A	N/A	N/A	chr10:-:45190110:45196154	0	0	0	1
uc007faa.1|uc007fab.1|uc007fac.1	Lin28b	380669	chr10:-:45196202:45205234	0	1	0	0
uc007fad.1|uc007fae.1|uc007faf.1	Hace1	209462	chr10:+:45325390:45358127	1	0	0	0
uc007fad.1|uc007fae.1|uc007faf.1	Hace1	209462	chr10:+:45338435:45368397	0	3	0	0
uc007egj.1	Fbxo5	67141	chr10:+:4541282:4544009	0	0	0	1
uc007egk.1	Vip	22353	chr10:-:4703018:4703947	0	0	1	6
N/A	N/A	N/A	chr10:-:4704069:4705807	1	0	0	0
uc007egm.1|uc007egn.1|uc007ego.1|uc007egp.1	Syne1	64009	chr10:+:4804593:4889673	1	0	0	0
N/A	N/A	N/A	chr10:-:48823454:48833176	0	1	0	0
uc007fag.1|uc007fah.1|uc007fai.1	Grik2	14806	chr10:-:48833426:48960385	0	0	0	1
uc007fag.1|uc007fah.1|uc007fai.1	Grik2	14806	chr10:-:48992769:49124143	0	0	0	1
uc007fag.1|uc007fah.1|uc007fai.1	Grik2	14806	chr10:-:49075921:49124143	0	1	0	0
N/A	N/A	N/A	chr10:-:49076944:49124143	1	0	0	0
uc007egm.1|uc007egn.1|uc007ego.1|uc007egp.1	Syne1	64009	chr10:+:4909802:4920266	0	0	2	0
uc007egm.1|uc007egn.1|uc007ego.1|uc007egp.1	Syne1	64009	chr10:+:4909802:4920781	0	0	1	0
uc007fag.1|uc007fah.1|uc007fai.1	Grik2	14806	chr10:-:49142478:49502951	1	0	0	0
uc007egm.1|uc007egn.1|uc007ego.1|uc007egp.1	Syne1	64009	chr10:+:4920286:4920781	0	0	1	0
uc007egm.1|uc007egn.1|uc007ego.1|uc007egp.1	Syne1	64009	chr10:+:4926161:4929642	0	1	0	0
uc007egm.1|uc007egn.1|uc007ego.1|uc007egp.1	Syne1	64009	chr10:+:4936777:4940979	0	0	0	1
uc007egm.1|uc007egn.1|uc007ego.1|uc007egp.1	Syne1	64009	chr10:+:4941116:4942536	0	2	0	0
N/A	N/A	N/A	chr10:+:4978789:4978882	2	1	0	0
uc007egm.1|uc007egn.1|uc007ego.1|uc007egp.1	Syne1	64009	chr10:+:4979050:4984960	1	2	0	0
uc007egm.1|uc007egn.1|uc007ego.1|uc007egp.1	Syne1	64009	chr10:+:4985056:4985665	0	1	0	0
uc007egm.1|uc007egn.1|uc007ego.1|uc007egp.1	Syne1	64009	chr10:+:4988207:4989721	0	1	0	0
uc007egm.1|uc007egn.1|uc007ego.1|uc007egp.1	Syne1	64009	chr10:+:4997612:4997792	0	2	0	0
uc007egm.1|uc007egn.1|uc007ego.1|uc007egp.1	Syne1	64009	chr10:+:4998000:4998611	0	0	0	1
uc007egm.1|uc007egn.1|uc007ego.1|uc007egp.1	Syne1	64009	chr10:+:5004387:5007156	2	4	0	0
uc007egm.1|uc007egn.1|uc007ego.1|uc007egp.1	Syne1	64009	chr10:+:5007316:5009208	0	0	1	1
uc007egm.1|uc007egn.1|uc007ego.1|uc007egp.1	Syne1	64009	chr10:+:5013130:5013503	1	0	0	0
uc007egm.1|uc007egn.1|uc007ego.1|uc007egp.1	Syne1	64009	chr10:+:5017082:5019059	0	0	3	0
uc007egm.1|uc007egn.1|uc007ego.1|uc007egp.1	Syne1	64009	chr10:+:5020031:5022144	0	0	1	0
N/A	N/A	N/A	chr10:+:5028198:5028567	0	2	0	0
N/A	N/A	N/A	chr10:+:5030616:5034752	0	0	0	1
uc007faj.1	AK144867	N/A	chr10:+:50312703:50324557	0	0	0	1
N/A	N/A	N/A	chr10:+:5034853:5037103	0	0	2	1
uc007faj.1	AK144867	N/A	chr10:+:50357834:50362329	0	2	0	0
uc007faj.1	AK144867	N/A	chr10:+:50362536:50364749	0	0	2	0
uc007faj.1	AK144867	N/A	chr10:+:50369115:50369599	0	1	0	0
uc007faj.1	AK144867	N/A	chr10:+:50380532:50409921	2	1	0	0
N/A	N/A	N/A	chr10:+:5042147:5044203	2	1	0	0
uc007fak.1	Ascc3	77987	chr10:+:50438252:50440418	2	2	0	0
N/A	N/A	N/A	chr10:+:5045304:5047498	0	0	2	0
N/A	N/A	N/A	chr10:+:5047789:5049279	0	0	1	0
N/A	N/A	N/A	chr10:+:5052829:5053301	0	1	0	0
N/A	N/A	N/A	chr10:+:5053465:5056969	0	3	0	0
N/A	N/A	N/A	chr10:+:5072284:5072773	0	0	1	0
N/A	N/A	N/A	chr10:+:5075734:5081310	0	0	2	0
N/A	N/A	N/A	chr10:+:5081453:5081776	0	0	2	0
N/A	N/A	N/A	chr10:+:5081931:5083725	0	0	1	0
N/A	N/A	N/A	chr10:+:5085648:5087149	0	2	0	0
N/A	N/A	N/A	chr10:+:5091148:5095547	0	0	2	0
N/A	N/A	N/A	chr10:+:5095864:5096783	0	3	0	0
N/A	N/A	N/A	chr10:+:5096938:5097092	2	0	0	0
N/A	N/A	N/A	chr10:+:5097262:5098169	0	3	0	0
N/A	N/A	N/A	chr10:+:5098495:5100055	0	0	0	1
N/A	N/A	N/A	chr10:+:5100207:5100570	0	2	0	0
N/A	N/A	N/A	chr10:+:5114965:5116827	0	2	0	0
uc007far.1|uc007fas.1	Lilrb4	14728	chr10:+:51213011:51213868	0	0	1	0
N/A	N/A	N/A	chr10:+:5124358:5124534	0	0	1	2
N/A	N/A	N/A	chr10:+:5130872:5131197	0	0	3	0
N/A	N/A	N/A	chr10:+:5131349:5134449	0	0	3	1
uc007faz.1|uc007fba.1	Vgll2	215031	chr10:+:51742609:51744863	0	1	0	0
uc007faz.1|uc007fba.1	Vgll2	215031	chr10:+:51745169:51747237	0	0	1	0
N/A	N/A	N/A	chr10:+:5177854:5184073	6	0	0	0
uc007fbc.1|uc007fbd.1|uc007fbe.1	Dcbld1	66686	chr10:+:51953641:52003909	1	0	0	0
uc007fbc.1|uc007fbd.1|uc007fbe.1	Dcbld1	66686	chr10:+:51981745:52024393	0	0	0	1
uc007fbc.1|uc007fbd.1|uc007fbe.1	Dcbld1	66686	chr10:+:52006205:52024393	1	0	0	0
uc007fbf.1|uc007fbg.1	Gopc	94221	chr10:-:52059659:52068878	0	0	2	0
uc007egq.1|uc007egr.1|uc007egs.1|uc007egt.1	Syne1	64009	chr10:+:5262717:5274338	0	0	1	0
uc007fbn.1	AK039734	N/A	chr10:-:53032431:53039404	0	0	1	1
uc007fbn.1	AK039734	N/A	chr10:-:53039525:53068278	0	0	1	2
uc007fbn.1	AK039734	N/A	chr10:-:53078013:53099315	0	0	0	1
uc007fbp.1|uc007fbq.1|uc007fbs.1	Mcm9	71567	chr10:-:53260889:53261343	1	2	0	0
uc007fbp.1|uc007fbq.1|uc007fbs.1	Mcm9	71567	chr10:-:53261425:53267209	0	0	1	1
N/A	N/A	N/A	chr10:-:53328820:53331158	0	0	1	0
uc007fbp.1|uc007fbq.1|uc007fbs.1	Mcm9	71567	chr10:-:53331277:53332633	0	0	2	1
uc007fbp.1|uc007fbq.1|uc007fbs.1	Mcm9	71567	chr10:-:53332758:53335658	1	1	0	0
uc007fbp.1|uc007fbq.1|uc007fbs.1	Mcm9	71567	chr10:-:53345840:53349530	0	0	1	1
uc007fbt.1|uc007fbu.1|uc007fbv.1	4930589M24Rik	N/A	chr10:-:53355240:53367378	0	1	0	0
uc007fbt.1|uc007fbu.1|uc007fbv.1	4930589M24Rik	N/A	chr10:-:53374985:53394372	1	0	0	0
uc007egu.1|uc007egv.1|uc007egw.1|uc007egx.1	Esr1	13982	chr10:-:5345352:5348528	0	0	1	1
uc007fbw.1|uc007fbx.1|uc007fby.1	Man1a	17155	chr10:-:53696923:53745520	1	0	0	0
uc007egu.1|uc007egv.1|uc007egw.1|uc007egx.1	Esr1	13982	chr10:-:5377382:5407191	0	1	0	0
uc007fbz.1	AK138755	N/A	chr10:+:53796659:53798029	2	1	0	0
uc007fbz.1	AK138755	N/A	chr10:+:53798209:53800771	0	1	0	0
uc007egu.1|uc007egv.1|uc007egw.1|uc007egx.1	Esr1	13982	chr10:-:5407329:5489348	0	0	1	0
uc007fca.1	D630037F22Rik	544696	chr10:-:55747893:55768669	0	0	1	0
uc007fca.1	D630037F22Rik	544696	chr10:-:55760085:55784280	0	0	0	1
uc007fca.1	D630037F22Rik	544696	chr10:-:55871659:55875486	0	0	2	1
uc007fca.1	D630037F22Rik	544696	chr10:-:55890777:55893648	1	1	0	0
uc007fca.1	D630037F22Rik	544696	chr10:-:55907639:55912646	2	0	0	0
uc007fca.1	D630037F22Rik	544696	chr10:-:55916275:55916364	0	0	1	1
uc007fca.1	D630037F22Rik	544696	chr10:-:55916467:55916594	0	0	0	1
uc007fca.1	D630037F22Rik	544696	chr10:-:55916672:55918241	0	0	1	0
uc007fca.1	D630037F22Rik	544696	chr10:-:55918366:55921694	1	2	0	0
uc007fca.1	D630037F22Rik	544696	chr10:-:55921762:55934756	0	0	0	2
uc007egu.1|uc007egv.1|uc007egw.1|uc007egx.1	Esr1	13982	chr10:-:5599924:5633694	0	1	0	0
uc007fcc.1|uc007fcd.1|uc007fce.1|uc007fcf.1|uc007fcg.1|uc007fch.1|uc007fci.1	Gja1	14609	chr10:+:56097148:56107340	0	0	1	0
uc007fcj.1	AK146861	N/A	chr10:+:56158456:56159470	0	0	1	0
uc007egu.1|uc007egv.1|uc007egw.1|uc007egx.1	Esr1	13982	chr10:-:5677318:5734386	0	2	0	0
N/A	N/A	N/A	chr10:+:57206798:57215704	0	0	0	1
N/A	N/A	N/A	chr10:-:57235893:57236124	0	0	1	2
N/A	N/A	N/A	chr10:+:57239396:57239504	0	0	1	0
uc007fcm.1|uc007fcn.1	Serinc1	56442	chr10:-:57239399:57252163	0	1	0	0
uc007fcm.1|uc007fcn.1	Serinc1	56442	chr10:-:57239648:57243767	0	0	0	1
N/A	N/A	N/A	chr10:-:57242980:57243767	0	0	0	1
N/A	N/A	N/A	chr10:-:57244179:57245131	1	0	0	0
uc007fco.1|uc007fcp.1|uc007fcq.1|uc007fcr.1|uc007fcs.1	Pkib	18768	chr10:+:57412076:57456096	0	0	0	1
uc007fco.1|uc007fcp.1|uc007fcq.1|uc007fcr.1|uc007fcs.1	Pkib	18768	chr10:+:57427987:57447896	0	0	1	0
uc007fcz.1|uc007fda.1|uc007fdb.1|uc007fdc.1	Lims1	110829	chr10:+:57875301:57881147	1	0	0	0
uc007fcz.1|uc007fda.1|uc007fdb.1|uc007fdc.1	Lims1	110829	chr10:+:57881534:57884202	1	1	0	0
uc007fdd.1|uc007fde.1	Ranbp2	19386	chr10:+:57914799:57916060	0	1	0	0
uc007fdd.1|uc007fde.1	Ranbp2	19386	chr10:+:57923353:57924584	2	3	0	0
uc007fdd.1|uc007fde.1	Ranbp2	19386	chr10:+:57924793:57926567	1	4	0	0
uc007fdd.1|uc007fde.1	Ranbp2	19386	chr10:+:57930042:57930138	3	3	0	0
uc007fdf.1|uc007fdg.1	Ccdc138	76138	chr10:+:57961961:57962110	0	0	1	1
uc007fdf.1|uc007fdg.1	Ccdc138	76138	chr10:+:57962167:57962945	1	0	0	0
uc007fdf.1|uc007fdg.1	Ccdc138	76138	chr10:+:57962167:57970269	2	1	0	0
uc007fdf.1|uc007fdg.1	Ccdc138	76138	chr10:+:57976005:57990090	0	0	0	1
uc007fdf.1|uc007fdg.1	Ccdc138	76138	chr10:+:58001158:58003546	0	2	0	0
uc007fdf.1|uc007fdg.1	Ccdc138	76138	chr10:+:58007857:58024649	2	0	0	0
uc007fdj.1|uc007fdk.1|uc007fdl.1	Sh3md4	N/A	chr10:+:58469885:58511969	0	2	0	0
uc007fdj.1|uc007fdk.1|uc007fdl.1	Sh3md4	N/A	chr10:+:58512328:58534684	0	0	0	1
uc007fdj.1|uc007fdk.1|uc007fdl.1	Sh3md4	N/A	chr10:+:58534784:58546196	0	0	1	0
uc007fdj.1|uc007fdk.1|uc007fdl.1	Sh3md4	N/A	chr10:+:58549664:58566920	3	1	0	0
uc007fdj.1|uc007fdk.1|uc007fdl.1	Sh3md4	N/A	chr10:+:58567239:58593719	2	0	0	0
uc007fdj.1|uc007fdk.1|uc007fdl.1	Sh3md4	N/A	chr10:+:58594053:58598568	4	2	0	0
uc007fdm.1|uc007fdn.1	40796	103080	chr10:-:58604488:58629252	0	1	0	0
uc007fdm.1|uc007fdn.1	40796	103080	chr10:-:58655109:58655446	0	0	4	4
uc007fdm.1|uc007fdn.1	40796	103080	chr10:-:58655563:58684139	1	0	0	0
N/A	N/A	N/A	chr10:+:58813311:58814831	2	0	0	0
uc007fds.1|uc007fdt.1|uc007fdu.1	Ccdc109a	215999	chr10:-:58919557:58953835	0	0	0	1
N/A	N/A	N/A	chr10:-:58980484:59079272	1	4	0	0
N/A	N/A	N/A	chr10:+:59165435:59184148	1	0	0	0
uc007ehc.1|uc007ehd.1|uc007ehe.1	Rmnd1	66084	chr10:+:5918132:5918850	0	1	0	0
N/A	N/A	N/A	chr10:+:5918172:5918850	0	1	0	0
uc007fdv.1|uc007fdw.1|uc007fdx.1|uc007fdy.1	Cbara1	216001	chr10:+:59195905:59289937	1	0	0	0
uc007ehc.1|uc007ehd.1|uc007ehe.1	Rmnd1	66084	chr10:+:5924459:5931898	0	0	0	1
uc007ehc.1|uc007ehd.1|uc007ehe.1	Rmnd1	66084	chr10:+:5924459:5943040	2	0	0	0
N/A	N/A	N/A	chr10:+:5927985:5929324	2	0	0	0
uc007ehc.1|uc007ehd.1|uc007ehe.1	Rmnd1	66084	chr10:+:5929388:5931898	1	1	0	0
N/A	N/A	N/A	chr10:+:59343195:59352776	1	0	0	0
N/A	N/A	N/A	chr10:+:5935809:5938616	0	0	1	0
N/A	N/A	N/A	chr10:+:59372360:59377799	0	0	1	0
N/A	N/A	N/A	chr10:+:5938736:5938932	0	3	0	0
uc007feg.1|uc007feh.1|uc007fei.1|uc007fej.1	Ascc1	69090	chr10:+:59476522:59494262	0	0	0	1
N/A	N/A	N/A	chr10:+:59494391:59504869	2	0	0	0
N/A	N/A	N/A	chr10:-:59517980:59594415	0	1	0	0
N/A	N/A	N/A	chr10:+:59527156:59560898	0	0	0	1
N/A	N/A	N/A	chr10:+:59544432:59560841	0	0	3	0
N/A	N/A	N/A	chr10:+:59584289:59584432	1	0	0	0
uc007fek.1|uc007fel.1	Spock2	94214	chr10:+:59586672:59594084	0	1	0	0
uc007ehf.1|uc007ehg.1	Zbtb2	381990	chr10:+:5958696:5976690	0	1	0	0
uc007ehf.1|uc007ehg.1	Zbtb2	381990	chr10:+:5959189:5971787	0	0	0	1
N/A	N/A	N/A	chr10:+:59592491:59593859	0	0	1	1
uc007fek.1|uc007fel.1	Spock2	94214	chr10:+:59592491:59594084	0	1	0	0
N/A	N/A	N/A	chr10:-:59594432:59595666	0	0	1	0
N/A	N/A	N/A	chr10:-:59594452:59645534	0	1	0	0
N/A	N/A	N/A	chr10:-:59594585:59597726	0	0	1	0
N/A	N/A	N/A	chr10:-:59594591:59597726	0	0	0	1
N/A	N/A	N/A	chr10:-:59595987:59596052	1	0	0	0
N/A	N/A	N/A	chr10:+:59596126:59596257	1	0	0	0
N/A	N/A	N/A	chr10:+:59597548:59597643	1	0	0	0
N/A	N/A	N/A	chr10:-:59597554:59597638	0	1	0	0
uc007fem.1	Chst3	53374	chr10:-:59649631:59650821	0	1	0	0
uc007fen.1|uc007feo.1|uc007fep.1|uc007feq.1	Psap	19156	chr10:+:59740530:59757281	1	0	0	0
uc007fen.1|uc007feo.1|uc007fep.1|uc007feq.1	Psap	19156	chr10:+:59747279:59754387	0	0	0	2
uc007fen.1|uc007feo.1|uc007fep.1|uc007feq.1	Psap	19156	chr10:+:59756222:59762212	0	1	0	0
uc007fen.1|uc007feo.1|uc007fep.1|uc007feq.1	Psap	19156	chr10:+:59756222:59762215	1	0	0	0
N/A	N/A	N/A	chr10:+:59762307:59762530	2	0	0	0
N/A	N/A	N/A	chr10:+:59762806:59762874	0	0	0	2
N/A	N/A	N/A	chr10:-:59763362:59763520	0	0	0	1
N/A	N/A	N/A	chr10:-:59763362:59763545	0	0	0	1
N/A	N/A	N/A	chr10:+:59764669:59764910	0	1	0	0
N/A	N/A	N/A	chr10:-:59764986:59765208	0	1	0	0
N/A	N/A	N/A	chr10:-:59765097:59765211	2	0	0	0
uc007fer.1|uc007fes.1|uc007fet.1|uc007feu.1|uc007fev.1|uc007fez.1|uc007ffa.1	Cdh23	22295	chr10:-:59768519:59768688	0	2	0	0
uc007fer.1|uc007fes.1|uc007fet.1|uc007feu.1|uc007fev.1|uc007fez.1|uc007ffa.1	Cdh23	22295	chr10:-:59770309:59770594	0	0	3	3
uc007fer.1|uc007fes.1|uc007fet.1|uc007feu.1|uc007fev.1|uc007fez.1|uc007ffa.1	Cdh23	22295	chr10:-:59770850:59773425	0	1	0	0
uc007fer.1|uc007fes.1|uc007fet.1|uc007feu.1|uc007fev.1|uc007fez.1|uc007ffa.1	Cdh23	22295	chr10:-:59773586:59773664	3	0	0	0
uc007fer.1|uc007fes.1|uc007fet.1|uc007feu.1|uc007fev.1|uc007fez.1|uc007ffa.1	Cdh23	22295	chr10:-:59777152:59777284	1	0	0	0
uc007fer.1|uc007fes.1|uc007fet.1|uc007feu.1|uc007fev.1|uc007fez.1|uc007ffa.1	Cdh23	22295	chr10:-:59779936:59780504	0	0	1	0
uc007fer.1|uc007fes.1|uc007fet.1|uc007feu.1|uc007fev.1|uc007fez.1|uc007ffa.1	Cdh23	22295	chr10:-:59780728:59782315	0	0	4	0
uc007fer.1|uc007fes.1|uc007fet.1|uc007feu.1|uc007fev.1|uc007fez.1|uc007ffa.1	Cdh23	22295	chr10:-:59792661:59793902	0	2	0	0
uc007fer.1|uc007fes.1|uc007fet.1|uc007feu.1|uc007fev.1|uc007fez.1|uc007ffa.1	Cdh23	22295	chr10:-:59794589:59798782	1	0	0	0
uc007few.1|uc007fex.1|uc007fey.1	4632428N05Rik	74048	chr10:+:59830541:59831277	0	0	0	1
uc007few.1|uc007fex.1|uc007fey.1	4632428N05Rik	74048	chr10:+:59831473:59831650	0	0	4	4
uc007fer.1|uc007fes.1|uc007fet.1|uc007feu.1|uc007fev.1|uc007fez.1|uc007ffa.1	Cdh23	22295	chr10:-:59842097:59845402	0	2	0	0
uc007fer.1|uc007fes.1|uc007fet.1|uc007feu.1|uc007fev.1|uc007fez.1|uc007ffa.1	Cdh23	22295	chr10:-:59847996:59849676	0	2	0	0
uc007fer.1|uc007fes.1|uc007fet.1|uc007feu.1|uc007fev.1|uc007fez.1|uc007ffa.1	Cdh23	22295	chr10:-:59854618:59855720	0	1	0	0
uc007fer.1|uc007fes.1|uc007fet.1|uc007feu.1|uc007fev.1|uc007fez.1|uc007ffa.1	Cdh23	22295	chr10:-:59871915:59873453	0	0	1	0
uc007fer.1|uc007fes.1|uc007fet.1|uc007feu.1|uc007fev.1|uc007fez.1|uc007ffa.1	Cdh23	22295	chr10:-:60059555:60059683	0	0	0	2
uc007fer.1|uc007fes.1|uc007fet.1|uc007feu.1|uc007fev.1|uc007fez.1|uc007ffa.1	Cdh23	22295	chr10:-:60059730:60060364	0	0	2	0
uc007fer.1|uc007fes.1|uc007fet.1|uc007feu.1|uc007fev.1|uc007fez.1|uc007ffa.1	Cdh23	22295	chr10:-:60112915:60120015	0	5	0	0
N/A	N/A	N/A	chr10:+:60151325:60151721	0	2	0	0
uc007ffd.1|uc007ffe.1|uc007fff.1	Unc5b	107449	chr10:-:60236579:60237101	0	0	3	2
uc007ffd.1|uc007ffe.1|uc007fff.1	Unc5b	107449	chr10:-:60237908:60240138	0	0	1	0
uc007ffm.1|uc007ffn.1|uc007ffo.1|uc007ffp.1|uc007ffq.1|uc007ffr.1|uc007ffs.1|uc007fft.1	1700021K02Rik	N/A	chr10:+:60642253:60643063	0	1	0	0
uc007ffm.1|uc007ffn.1|uc007ffo.1|uc007ffp.1|uc007ffq.1|uc007ffr.1|uc007ffs.1|uc007fft.1	1700021K02Rik	N/A	chr10:+:60643142:60646048	0	3	0	0
uc007ffm.1|uc007ffn.1|uc007ffo.1|uc007ffp.1|uc007ffq.1|uc007ffr.1|uc007ffs.1|uc007fft.1	1700021K02Rik	N/A	chr10:+:60649179:60650425	0	1	0	0
uc007ffm.1|uc007ffn.1|uc007ffo.1|uc007ffp.1|uc007ffq.1|uc007ffr.1|uc007ffs.1|uc007fft.1	1700021K02Rik	N/A	chr10:+:60650477:60651344	2	2	0	0
uc007ffu.1	Adamts14	237360	chr10:-:60668280:60670048	0	0	0	1
N/A	N/A	N/A	chr10:-:60811134:60811282	0	1	0	0
uc007ffx.1	X99384	27355	chr10:-:60818784:60846040	1	5	0	0
N/A	N/A	N/A	chr10:+:60938664:60945090	1	0	0	0
N/A	N/A	N/A	chr10:+:60939218:60989808	1	0	0	0
uc007fgc.1	Lrrc20	216011	chr10:+:60945230:61010796	0	0	0	2
N/A	N/A	N/A	chr10:+:60983573:60989808	0	0	1	0
uc007fge.1	Ppa1	67895	chr10:+:61128214:61130333	0	0	0	1
uc007fgg.1	Sar1a	20224	chr10:+:61147933:61149123	0	0	0	1
N/A	N/A	N/A	chr10:+:61199506:61201149	0	2	0	0
N/A	N/A	N/A	chr10:-:61203183:61203883	1	1	0	0
uc007fgm.1	H2afy2	404634	chr10:-:61209470:61210420	2	4	0	0
N/A	N/A	N/A	chr10:+:61302471:61302735	0	1	0	0
N/A	N/A	N/A	chr10:+:61325248:61336722	1	2	0	0
uc007fgn.1|uc007fgo.1|uc007fgp.1|uc007fgq.1	Col13a1	12817	chr10:-:61359922:61365838	0	1	0	0
uc007fgx.1	Tacr2	21337	chr10:+:61724073:61724232	0	1	0	0
uc007fgy.1|uc007fgz.1|uc007fha.1	Hk1	15275	chr10:-:61754791:61755062	1	0	0	0
N/A	N/A	N/A	chr10:-:61778296:61802353	0	0	0	1
uc007fhc.1	Hkdc1	216019	chr10:-:61854214:61856435	0	0	1	0
uc007fhc.1	Hkdc1	216019	chr10:-:61856618:61857903	0	1	0	0
uc007fhc.1	Hkdc1	216019	chr10:-:61858241:61861333	2	1	0	0
uc007fhc.1	Hkdc1	216019	chr10:-:61863244:61864472	0	1	0	0
uc007fhc.1	Hkdc1	216019	chr10:-:61866395:61868173	0	0	0	1
N/A	N/A	N/A	chr10:-:6190850:6198415	0	0	0	2
uc007fhf.1|uc007fhg.1|uc007fhh.1	Vps26a	30930	chr10:-:61927486:61931038	0	2	0	0
uc007fhf.1|uc007fhg.1|uc007fhh.1	Vps26a	30930	chr10:-:61943455:61949126	2	0	0	0
uc007fhj.1|uc007fhk.1|uc007fhl.1|uc007fhm.1	2510003E04Rik	72320	chr10:-:62002804:62025984	0	0	1	0
uc007fhj.1|uc007fhk.1|uc007fhl.1|uc007fhm.1	2510003E04Rik	72320	chr10:-:62033226:62040712	1	0	0	0
uc007fhn.1	Ddx21	56200	chr10:-:62052675:62054565	0	0	2	1
uc007fho.1|uc007fhp.1|uc007fhq.1	Ddx50	94213	chr10:-:62079264:62084137	1	1	0	0
uc007fho.1|uc007fhp.1|uc007fhq.1	Ddx50	94213	chr10:-:62105702:62106045	2	1	0	0
uc007fho.1|uc007fhp.1|uc007fhq.1	Ddx50	94213	chr10:-:62109949:62113773	0	2	0	0
N/A	N/A	N/A	chr10:-:62110391:62113773	1	1	0	0
uc007fhr.1	AK028920	N/A	chr10:-:62129073:62130569	0	0	1	0
uc007fja.1|uc007fjb.1|uc007fjc.1|uc007fjd.1	Ccar1	67500	chr10:-:62208216:62210092	0	0	0	1
uc007fja.1|uc007fjb.1|uc007fjc.1|uc007fjd.1	Ccar1	67500	chr10:-:62208216:62213295	0	0	0	2
uc007fja.1|uc007fjb.1|uc007fjc.1|uc007fjd.1	Ccar1	67500	chr10:-:62219422:62226188	0	0	1	0
uc007fja.1|uc007fjb.1|uc007fjc.1|uc007fjd.1	Ccar1	67500	chr10:-:62226271:62228015	4	2	0	0
N/A	N/A	N/A	chr10:-:62253790:62254878	0	1	0	0
N/A	N/A	N/A	chr10:-:62276160:62276272	0	0	0	1
uc007fjf.1	AK129421	N/A	chr10:-:62282371:62285297	0	0	1	0
uc007fjf.1	AK129421	N/A	chr10:-:62285508:62295642	0	0	0	2
uc007fjf.1	AK129421	N/A	chr10:-:62295735:62296286	1	0	0	0
uc007fji.1|uc007fjj.1|uc007fjk.1	Dna2l	N/A	chr10:+:62417077:62418062	0	0	1	0
uc007fji.1|uc007fjj.1|uc007fjk.1	Dna2l	N/A	chr10:+:62419897:62420801	0	0	0	1
uc007fji.1|uc007fjj.1|uc007fjk.1	Dna2l	N/A	chr10:+:62422117:62422960	1	0	0	0
uc007fji.1|uc007fjj.1|uc007fjk.1	Dna2l	N/A	chr10:+:62423190:62424169	1	0	0	0
uc007fji.1|uc007fjj.1|uc007fjk.1	Dna2l	N/A	chr10:+:62424285:62424362	1	0	0	0
uc007fji.1|uc007fjj.1|uc007fjk.1	Dna2l	N/A	chr10:+:62424471:62425144	0	0	2	1
uc007fji.1|uc007fjj.1|uc007fjk.1	Dna2l	N/A	chr10:+:62425253:62426553	0	0	0	1
uc007fji.1|uc007fjj.1|uc007fjk.1	Dna2l	N/A	chr10:+:62427841:62429165	0	0	0	1
uc007fji.1|uc007fjj.1|uc007fjk.1	Dna2l	N/A	chr10:+:62429254:62429348	0	0	0	1
uc007fji.1|uc007fjj.1|uc007fjk.1	Dna2l	N/A	chr10:+:62429552:62430401	0	2	0	0
uc007fji.1|uc007fjj.1|uc007fjk.1	Dna2l	N/A	chr10:+:62430490:62434592	0	0	1	0
uc007fji.1|uc007fjj.1|uc007fjk.1	Dna2l	N/A	chr10:+:62432706:62434592	0	0	0	1
uc007fji.1|uc007fjj.1|uc007fjk.1	Dna2l	N/A	chr10:+:62434738:62435999	0	0	3	1
N/A	N/A	N/A	chr10:+:62444236:62445419	0	1	0	0
uc007fjl.1|uc007fjm.1|uc007fjn.1	Rufy2	70432	chr10:+:62445592:62453728	0	0	0	1
N/A	N/A	N/A	chr10:+:62457518:62458061	0	0	2	2
N/A	N/A	N/A	chr10:+:62465028:62467362	0	0	0	1
uc007fjl.1|uc007fjm.1|uc007fjn.1	Rufy2	70432	chr10:+:62474591:62479176	0	0	0	1
N/A	N/A	N/A	chr10:-:62478912:62479159	2	0	0	0
N/A	N/A	N/A	chr10:-:62482275:62486447	0	1	0	0
N/A	N/A	N/A	chr10:+:62487213:62501837	0	0	1	0
uc007fjr.1	3110049J23Rik	67307	chr10:+:62487484:62501837	3	0	0	0
uc007fjx.1|uc007fjy.1	Mypn	68802	chr10:-:62584857:62586019	0	0	0	1
uc007fka.1|uc007fkb.1|uc007fkc.1|uc007fkd.1	Herc4	67345	chr10:+:62726933:62769096	0	2	0	0
uc007fka.1|uc007fkb.1|uc007fkc.1|uc007fkd.1	Herc4	67345	chr10:+:62732452:62741083	1	0	0	0
uc007fka.1|uc007fkb.1|uc007fkc.1|uc007fkd.1	Herc4	67345	chr10:+:62736420:62741083	0	1	0	0
uc007fka.1|uc007fkb.1|uc007fkc.1|uc007fkd.1	Herc4	67345	chr10:+:62750757:62761868	0	1	0	0
uc007fka.1|uc007fkb.1|uc007fkc.1|uc007fkd.1	Herc4	67345	chr10:+:62771198:62777235	0	1	0	0
uc007fke.1|uc007fkf.1	Sirt1	93759	chr10:-:62794645:62798384	0	0	0	1
uc007fke.1|uc007fkf.1	Sirt1	93759	chr10:-:62798625:62799728	0	2	0	0
N/A	N/A	N/A	chr10:+:62845919:62858533	0	0	1	2
uc007fkh.1|uc007fki.1|uc007fkj.1	Ctnna3	216033	chr10:+:63713526:63723561	0	4	0	0
uc007fkh.1|uc007fki.1|uc007fkj.1	Ctnna3	216033	chr10:+:63872031:63950210	0	2	0	0
uc007ehl.1|uc007ehm.1|uc007ehn.1|uc007eho.1	Plekhg1	213783	chr10:-:6389995:6394208	0	0	0	2
uc007fkh.1|uc007fki.1|uc007fkj.1	Ctnna3	216033	chr10:+:63950366:64048708	0	1	0	0
uc007ehl.1|uc007ehm.1|uc007ehn.1|uc007eho.1	Plekhg1	213783	chr10:-:6396874:6398938	0	0	1	0
uc007ehl.1|uc007ehm.1|uc007ehn.1|uc007eho.1	Plekhg1	213783	chr10:-:6399021:6400617	0	4	0	0
uc007ehl.1|uc007ehm.1|uc007ehn.1|uc007eho.1	Plekhg1	213783	chr10:-:6406103:6406190	0	0	2	0
uc007ehl.1|uc007ehm.1|uc007ehn.1|uc007eho.1	Plekhg1	213783	chr10:-:6408691:6412794	0	1	0	0
uc007ehl.1|uc007ehm.1|uc007ehn.1|uc007eho.1	Plekhg1	213783	chr10:-:6412944:6416288	2	0	0	0
uc007fkh.1|uc007fki.1|uc007fkj.1	Ctnna3	216033	chr10:+:64422652:64465294	3	0	0	0
uc007ehl.1|uc007ehm.1|uc007ehn.1|uc007eho.1	Plekhg1	213783	chr10:-:6442984:6473100	0	0	1	0
uc007ehl.1|uc007ehm.1|uc007ehn.1|uc007eho.1	Plekhg1	213783	chr10:-:6473614:6543741	0	0	1	0
uc007ehl.1|uc007ehm.1|uc007ehn.1|uc007eho.1	Plekhg1	213783	chr10:-:6543801:6605534	0	0	1	0
N/A	N/A	N/A	chr10:-:66525819:66558958	2	0	0	0
uc007flr.1|uc007fls.1|uc007flt.1|uc007flu.1|uc007flv.1	Jmjd1c	108829	chr10:+:66620819:66652484	0	0	1	1
uc007flr.1|uc007fls.1|uc007flt.1|uc007flu.1|uc007flv.1	Jmjd1c	108829	chr10:+:66652597:66678018	0	0	0	1
uc007flr.1|uc007fls.1|uc007flt.1|uc007flu.1|uc007flv.1	Jmjd1c	108829	chr10:+:66678123:66680786	1	0	0	0
uc007flr.1|uc007fls.1|uc007flt.1|uc007flu.1|uc007flv.1	Jmjd1c	108829	chr10:+:66679855:66680786	0	0	1	1
N/A	N/A	N/A	chr10:+:66712554:66715120	1	0	0	0
uc007flw.1	Nrbf2	641340	chr10:-:66730914:66732854	0	0	0	1
N/A	N/A	N/A	chr10:-:66738402:66746683	2	0	0	0
N/A	N/A	N/A	chr10:-:67352738:67355907	0	0	3	1
uc007fmd.1|uc007fme.1	Plekhk1	N/A	chr10:+:67464725:67465952	0	0	0	1
uc007fmd.1|uc007fme.1	Plekhk1	N/A	chr10:+:67468442:67480554	2	2	0	0
uc007fmd.1|uc007fme.1	Plekhk1	N/A	chr10:+:67498699:67502779	0	2	0	0
uc007fmd.1|uc007fme.1	Plekhk1	N/A	chr10:+:67521006:67521862	0	0	1	0
N/A	N/A	N/A	chr10:-:67589475:67591537	2	0	0	0
uc007fmf.1|uc007fmg.1|uc007fmh.1|uc007fmi.1|uc007fmj.1	Arid5b	71371	chr10:-:67589499:67591537	0	3	0	0
uc007fmf.1|uc007fmg.1|uc007fmh.1|uc007fmi.1|uc007fmj.1	Arid5b	71371	chr10:-:67591741:67597742	0	2	0	0
uc007fmf.1|uc007fmg.1|uc007fmh.1|uc007fmi.1|uc007fmj.1	Arid5b	71371	chr10:-:67597854:67648774	1	0	0	0
uc007fmf.1|uc007fmg.1|uc007fmh.1|uc007fmi.1|uc007fmj.1	Arid5b	71371	chr10:-:67649004:67705752	1	3	0	0
uc007fml.1	1700040L02Rik	73287	chr10:-:67899168:67899591	0	1	0	0
uc007fml.1	1700040L02Rik	73287	chr10:-:67899713:67972445	1	0	0	0
uc007ehp.1	Iyd	70337	chr10:-:6792511:6794511	0	1	0	0
uc007ehp.1	Iyd	70337	chr10:-:6794667:6799377	0	1	0	0
uc007fml.1	1700040L02Rik	73287	chr10:-:67972517:67979014	0	1	0	0
uc007fml.1	1700040L02Rik	73287	chr10:-:67979158:67988346	0	0	2	0
uc007fml.1	1700040L02Rik	73287	chr10:-:67988515:67996560	1	0	0	0
uc007ehp.1	Iyd	70337	chr10:-:6799536:6800840	1	1	0	0
N/A	N/A	N/A	chr10:+:68723993:68728935	1	0	0	0
uc007fmo.1|uc007fmp.1|uc007fmq.1	Rhobtb1	69288	chr10:+:68733621:68735487	0	0	1	1
uc007fmo.1|uc007fmp.1|uc007fmq.1	Rhobtb1	69288	chr10:+:68742243:68748435	0	1	0	0
uc007ehq.1|uc007ehr.1|uc007ehs.1	Ppp1r14c	76142	chr10:-:6883152:6979572	3	0	0	0
N/A	N/A	N/A	chr10:+:69285141:69285826	0	1	0	0
N/A	N/A	N/A	chr10:+:69285849:69287066	0	0	1	0
N/A	N/A	N/A	chr10:+:69287164:69287415	0	0	0	1
uc007fmt.1|uc007fmu.1|uc007fmv.1|uc007fmw.1|uc007fmx.1|uc007fmy.1|uc007fmz.1|uc007fna.1|uc007fnb.1|uc007fnc.1|uc007fnd.1|uc007fne.1|uc007fnf.1|uc007fng.1|uc007fnh.1|uc007fni.1|uc007fnj.1|uc007fnk.1|uc007fnl.1|uc007fnm.1|uc007fnn.1	Ank3	11735	chr10:+:69413806:69416188	1	0	0	0
N/A	N/A	N/A	chr10:+:69418898:69419416	0	0	2	1
N/A	N/A	N/A	chr10:+:69443158:69448837	1	0	0	0
N/A	N/A	N/A	chr10:+:69444909:69448831	0	0	2	1
uc007fmt.1|uc007fmu.1|uc007fmv.1|uc007fmw.1|uc007fmx.1|uc007fmy.1|uc007fmz.1|uc007fna.1|uc007fnb.1|uc007fnc.1|uc007fnd.1|uc007fne.1|uc007fnf.1|uc007fng.1|uc007fnh.1|uc007fni.1|uc007fnj.1|uc007fnk.1|uc007fnl.1|uc007fnm.1|uc007fnn.1	Ank3	11735	chr10:+:69465349:69478316	0	1	0	0
N/A	N/A	N/A	chr10:+:69476803:69478319	0	0	0	2
N/A	N/A	N/A	chr10:+:69476994:69478316	0	0	1	0
N/A	N/A	N/A	chr10:+:69650563:69650675	0	1	0	0
uc007fns.1|uc007fnt.1|uc007fnu.1|uc007fnv.1|uc007fnw.1|uc007fnx.1|uc007fny.1	mKIAA1796	N/A	chr10:+:69903646:69903785	0	0	1	0
uc007fnz.1|uc007foa.1|uc007fob.1	Phyhipl	70911	chr10:-:70022529:70033571	0	3	0	0
uc007fnz.1|uc007foa.1|uc007fob.1	Phyhipl	70911	chr10:-:70028039:70033571	0	0	1	0
uc007fof.1|uc007fog.1|uc007foh.1|uc007foi.1	Bicc1	83675	chr10:-:70394993:70398580	1	0	0	0
uc007fof.1|uc007fog.1|uc007foh.1|uc007foi.1	Bicc1	83675	chr10:-:70403787:70406118	0	0	0	1
uc007fof.1|uc007fog.1|uc007foh.1|uc007foi.1	Bicc1	83675	chr10:-:70406283:70407973	0	2	0	0
uc007fof.1|uc007fog.1|uc007foh.1|uc007foi.1	Bicc1	83675	chr10:-:70408129:70409293	1	0	0	0
uc007fof.1|uc007fog.1|uc007foh.1|uc007foi.1	Bicc1	83675	chr10:-:70410681:70412687	0	2	0	0
N/A	N/A	N/A	chr10:-:70415930:70416143	2	1	0	0
uc007fof.1|uc007fog.1|uc007foh.1|uc007foi.1	Bicc1	83675	chr10:-:70420462:70421522	1	0	0	0
uc007fof.1|uc007fog.1|uc007foh.1|uc007foi.1	Bicc1	83675	chr10:-:70421680:70423883	3	3	0	0
uc007fof.1|uc007fog.1|uc007foh.1|uc007foi.1	Bicc1	83675	chr10:-:70423962:70490646	1	2	0	0
uc007fof.1|uc007fog.1|uc007foh.1|uc007foi.1	Bicc1	83675	chr10:-:70541984:70622169	0	1	0	0
N/A	N/A	N/A	chr10:-:70699779:70700104	0	0	2	0
uc007foo.1	Ube2d1	216080	chr10:-:70721054:70724832	0	0	0	1
N/A	N/A	N/A	chr10:+:72118583:72118731	1	0	0	0
uc007foy.1|uc007foz.1|uc007fpa.1	Zwint	52696	chr10:+:72118821:72119565	0	1	0	0
uc007foy.1|uc007foz.1|uc007fpa.1	Zwint	52696	chr10:+:72119109:72119794	2	0	0	0
N/A	N/A	N/A	chr10:+:72119444:72119568	1	0	0	0
uc007foy.1|uc007foz.1|uc007fpa.1	Zwint	52696	chr10:+:72119444:72119794	0	0	1	0
N/A	N/A	N/A	chr10:+:72119933:72120021	0	1	0	0
uc007foy.1|uc007foz.1|uc007fpa.1	Zwint	52696	chr10:+:72119933:72131560	0	0	0	1
N/A	N/A	N/A	chr10:+:72119933:72137109	0	0	0	1
N/A	N/A	N/A	chr10:-:72120129:72137119	0	1	0	0
N/A	N/A	N/A	chr10:+:72136957:72137399	0	0	0	1
N/A	N/A	N/A	chr10:-:72137101:72137390	0	0	1	1
N/A	N/A	N/A	chr10:-:72137283:72137343	1	0	0	0
N/A	N/A	N/A	chr10:-:72403758:72407015	1	0	0	0
N/A	N/A	N/A	chr10:-:72412841:72421142	1	0	0	0
uc007fpb.1	AK039487	N/A	chr10:-:72437443:72444740	1	0	0	0
uc007fpb.1	AK039487	N/A	chr10:-:72440623:72444740	0	0	1	0
uc007fpb.1	AK039487	N/A	chr10:-:72444855:72481300	0	1	0	0
uc007fpb.1	AK039487	N/A	chr10:-:72481515:72549426	0	0	0	1
uc007fpc.1|uc007fpd.1	AK080816	N/A	chr10:+:72946681:73177487	0	0	0	1
uc007ehv.1|uc007ehw.1	Lrp11	237253	chr10:+:7310411:7323972	0	0	4	0
uc007ehv.1|uc007ehw.1	Lrp11	237253	chr10:+:7310411:7343428	0	0	0	1
uc007ehv.1|uc007ehw.1	Lrp11	237253	chr10:+:7316062:7323972	0	0	0	1
N/A	N/A	N/A	chr10:+:7316062:7324022	1	0	0	0
uc007fpe.1|uc007fpf.1|uc007fpg.1|uc007fph.1|uc007fpi.1|uc007fpj.1|uc007fpk.1|uc007fpl.1|uc007fpm.1|uc007fpn.1|uc007fpo.1|uc007fpp.1|uc007fpq.1|uc007fpr.1	Pcdh15	11994	chr10:+:73177535:73409776	0	0	0	1
uc007ehv.1|uc007ehw.1	Lrp11	237253	chr10:+:7322752:7343428	0	0	2	0
uc007ehv.1|uc007ehw.1	Lrp11	237253	chr10:+:7324181:7343428	2	4	0	0
N/A	N/A	N/A	chr10:+:73285007:73285627	2	0	0	0
N/A	N/A	N/A	chr10:-:7344711:7344849	1	1	0	0
uc007ehx.1|uc007ehy.1|uc007ehz.1|uc007eia.1	Pcmt1	18537	chr10:-:7350774:7382873	0	1	0	0
uc007fpe.1|uc007fpf.1|uc007fpg.1|uc007fph.1|uc007fpi.1|uc007fpj.1|uc007fpk.1|uc007fpl.1|uc007fpm.1|uc007fpn.1|uc007fpo.1|uc007fpp.1|uc007fpq.1|uc007fpr.1	Pcdh15	11994	chr10:+:73514411:73633197	0	1	0	0
uc007ehx.1|uc007ehy.1|uc007ehz.1|uc007eia.1	Pcmt1	18537	chr10:-:7358023:7364123	0	0	2	1
N/A	N/A	N/A	chr10:+:7359920:7360489	1	0	0	0
uc007ehx.1|uc007ehy.1|uc007ehz.1|uc007eia.1	Pcmt1	18537	chr10:-:7360613:7368849	1	0	0	0
N/A	N/A	N/A	chr10:-:7367419:7368265	0	0	0	4
N/A	N/A	N/A	chr10:-:7368951:7382873	0	0	0	1
N/A	N/A	N/A	chr10:-:7368953:7400705	0	0	1	2
N/A	N/A	N/A	chr10:-:7370013:7382667	0	0	2	1
uc007fpe.1|uc007fpf.1|uc007fpg.1|uc007fph.1|uc007fpi.1|uc007fpj.1|uc007fpk.1|uc007fpl.1|uc007fpm.1|uc007fpn.1|uc007fpo.1|uc007fpp.1|uc007fpq.1|uc007fpr.1	Pcdh15	11994	chr10:+:73753820:73765839	0	0	1	1
uc007fpe.1|uc007fpf.1|uc007fpg.1|uc007fph.1|uc007fpi.1|uc007fpj.1|uc007fpk.1|uc007fpl.1|uc007fpm.1|uc007fpn.1|uc007fpo.1|uc007fpp.1|uc007fpq.1|uc007fpr.1	Pcdh15	11994	chr10:+:73779914:73787103	0	0	1	1
uc007fpe.1|uc007fpf.1|uc007fpg.1|uc007fph.1|uc007fpi.1|uc007fpj.1|uc007fpk.1|uc007fpl.1|uc007fpm.1|uc007fpn.1|uc007fpo.1|uc007fpp.1|uc007fpq.1|uc007fpr.1	Pcdh15	11994	chr10:+:73787237:73788800	0	1	0	0
uc007fpe.1|uc007fpf.1|uc007fpg.1|uc007fph.1|uc007fpi.1|uc007fpj.1|uc007fpk.1|uc007fpl.1|uc007fpm.1|uc007fpn.1|uc007fpo.1|uc007fpp.1|uc007fpq.1|uc007fpr.1	Pcdh15	11994	chr10:+:73818735:73842078	2	2	0	0
N/A	N/A	N/A	chr10:+:7383568:7387800	0	0	0	2
uc007fpe.1|uc007fpf.1|uc007fpg.1|uc007fph.1|uc007fpi.1|uc007fpj.1|uc007fpk.1|uc007fpl.1|uc007fpm.1|uc007fpn.1|uc007fpo.1|uc007fpp.1|uc007fpq.1|uc007fpr.1	Pcdh15	11994	chr10:+:73916846:73929027	1	0	0	0
N/A	N/A	N/A	chr10:-:7400435:7400705	1	1	0	0
uc007fpe.1|uc007fpf.1|uc007fpg.1|uc007fph.1|uc007fpi.1|uc007fpj.1|uc007fpk.1|uc007fpl.1|uc007fpm.1|uc007fpn.1|uc007fpo.1|uc007fpp.1|uc007fpq.1|uc007fpr.1	Pcdh15	11994	chr10:+:74046973:74056905	0	0	2	1
uc007fpe.1|uc007fpf.1|uc007fpg.1|uc007fph.1|uc007fpi.1|uc007fpj.1|uc007fpk.1|uc007fpl.1|uc007fpm.1|uc007fpn.1|uc007fpo.1|uc007fpp.1|uc007fpq.1|uc007fpr.1	Pcdh15	11994	chr10:+:74046973:74083944	0	0	2	0
uc007fpe.1|uc007fpf.1|uc007fpg.1|uc007fph.1|uc007fpi.1|uc007fpj.1|uc007fpk.1|uc007fpl.1|uc007fpm.1|uc007fpn.1|uc007fpo.1|uc007fpp.1|uc007fpq.1|uc007fpr.1	Pcdh15	11994	chr10:+:74056993:74083944	0	0	1	0
uc007fpe.1|uc007fpf.1|uc007fpg.1|uc007fph.1|uc007fpi.1|uc007fpj.1|uc007fpk.1|uc007fpl.1|uc007fpm.1|uc007fpn.1|uc007fpo.1|uc007fpp.1|uc007fpq.1|uc007fpr.1	Pcdh15	11994	chr10:+:74087168:74088892	0	1	0	0
uc007fpe.1|uc007fpf.1|uc007fpg.1|uc007fph.1|uc007fpi.1|uc007fpj.1|uc007fpk.1|uc007fpl.1|uc007fpm.1|uc007fpn.1|uc007fpo.1|uc007fpp.1|uc007fpq.1|uc007fpr.1	Pcdh15	11994	chr10:+:74099940:74104088	0	0	1	0
N/A	N/A	N/A	chr10:+:7422918:7424073	1	1	0	0
N/A	N/A	N/A	chr10:+:74434988:74441536	0	1	0	0
uc007fpt.1|uc007fpu.1	Gnaz	14687	chr10:+:74441601:74477613	1	0	0	0
uc007fpw.1|uc007fpx.1|uc007fpy.1|uc007fpz.1|uc007fqa.1	Rab36	76877	chr10:+:74500066:74501178	1	2	0	0
uc007fpw.1|uc007fpx.1|uc007fpy.1|uc007fpz.1|uc007fqa.1	Rab36	76877	chr10:+:74507281:74511194	0	0	0	1
N/A	N/A	N/A	chr10:-:74523172:74523617	0	1	0	0
uc007eii.1	Katna1	23924	chr10:+:7461363:7468574	1	0	0	0
uc007fqb.1|uc007fqc.1	Bcr	110279	chr10:+:74623149:74630852	0	0	1	0
N/A	N/A	N/A	chr10:+:74691676:74693427	0	1	0	0
uc007fqd.1|uc007fqe.1|uc007fqf.1|uc007fqg.1	mKIAA0376	N/A	chr10:+:74726115:74736762	0	0	0	1
uc007fqj.1	Upb1	103149	chr10:+:74869904:74875512	0	1	0	0
uc007fqj.1	Upb1	103149	chr10:+:74875683:74877735	1	0	0	0
uc007fqj.1	Upb1	103149	chr10:+:74877822:74887238	0	2	0	0
uc007eij.1|uc007eik.1|uc007eil.1	BC013529	215751	chr10:-:7493226:7493746	0	0	0	1
uc007fqm.1	Snrpd3	67332	chr10:+:74982205:74998006	2	1	0	0
N/A	N/A	N/A	chr10:+:74994975:74998006	0	0	2	0
uc007fqo.1|uc007fqp.1	Ggt1	14598	chr10:+:75036493:75036974	1	0	0	0
uc007fqo.1|uc007fqp.1	Ggt1	14598	chr10:+:75036493:75036977	1	0	0	0
uc007fqo.1|uc007fqp.1	Ggt1	14598	chr10:+:75037141:75038695	0	1	0	0
uc007fqo.1|uc007fqp.1	Ggt1	14598	chr10:+:75037141:75041474	0	1	0	0
uc007fqo.1|uc007fqp.1	Ggt1	14598	chr10:+:75041666:75041971	0	0	1	1
uc007fqo.1|uc007fqp.1	Ggt1	14598	chr10:+:75044178:75047565	0	2	0	0
uc007fqo.1|uc007fqp.1	Ggt1	14598	chr10:+:75048030:75048132	0	1	0	0
uc007fqq.1|uc007fqr.1|uc007fqs.1	Ggtla1	N/A	chr10:+:75066907:75067388	0	0	1	1
N/A	N/A	N/A	chr10:-:75097638:75098475	0	0	1	1
N/A	N/A	N/A	chr10:-:75097638:75099336	0	0	1	3
N/A	N/A	N/A	chr10:-:75097641:75098475	0	0	2	0
N/A	N/A	N/A	chr10:+:75100978:75102094	0	0	0	1
uc007fqt.1	Susd2	71733	chr10:-:75103694:75104870	1	0	0	0
uc007fqt.1	Susd2	71733	chr10:-:75104345:75106619	0	0	0	3
uc007fqt.1	Susd2	71733	chr10:-:75105021:75106619	1	0	0	0
uc007fqu.1|uc007fqv.1|uc007fqw.1|uc007fqx.1|uc007fqy.1|uc007fqz.1	Cabin1	104248	chr10:-:75120637:75121383	0	1	0	0
uc007fqu.1|uc007fqv.1|uc007fqw.1|uc007fqx.1|uc007fqy.1|uc007fqz.1	Cabin1	104248	chr10:-:75147150:75209233	0	0	1	0
uc007eio.1|uc007eip.1	Ppil4	67418	chr10:+:7515659:7524754	0	1	0	0
uc007fqu.1|uc007fqv.1|uc007fqw.1|uc007fqx.1|uc007fqy.1|uc007fqz.1	Cabin1	104248	chr10:-:75162840:75176198	0	1	0	0
uc007fqu.1|uc007fqv.1|uc007fqw.1|uc007fqx.1|uc007fqy.1|uc007fqz.1	Cabin1	104248	chr10:-:75212918:75214181	1	1	0	0
uc007fqu.1|uc007fqv.1|uc007fqw.1|uc007fqx.1|uc007fqy.1|uc007fqz.1	Cabin1	104248	chr10:-:75216256:75216996	2	2	0	0
uc007fqu.1|uc007fqv.1|uc007fqw.1|uc007fqx.1|uc007fqy.1|uc007fqz.1	Cabin1	104248	chr10:-:75217109:75217557	0	0	2	1
N/A	N/A	N/A	chr10:+:7521767:7521859	1	1	0	0
uc007fqu.1|uc007fqv.1|uc007fqw.1|uc007fqx.1|uc007fqy.1|uc007fqz.1	Cabin1	104248	chr10:-:75218245:75226770	0	3	0	0
uc007frb.1	Gstt3	103140	chr10:-:75237755:75238616	1	0	0	0
uc007ftj.1|uc007ftk.1|uc007ftl.1	Derl3	70377	chr10:+:75356262:75356364	0	0	3	1
uc007ftj.1|uc007ftk.1|uc007ftl.1	Derl3	70377	chr10:+:75356262:75356367	0	0	1	0
uc007ftj.1|uc007ftk.1|uc007ftl.1	Derl3	70377	chr10:+:75356429:75356515	0	0	1	1
uc007ftj.1|uc007ftk.1|uc007ftl.1	Derl3	70377	chr10:+:75356588:75356712	4	1	0	0
uc007ftj.1|uc007ftk.1|uc007ftl.1	Derl3	70377	chr10:+:75357372:75357784	0	0	3	2
uc007ftm.1|uc007ftn.1	Smarcb1	20587	chr10:-:75377938:75384048	0	0	0	1
uc007fto.1|uc007ftp.1	Mmp11	17385	chr10:-:75386860:75388165	3	1	0	0
uc007fto.1|uc007ftp.1	Mmp11	17385	chr10:-:75388422:75389156	0	0	0	1
uc007fto.1|uc007ftp.1	Mmp11	17385	chr10:-:75389734:75389874	0	0	2	1
uc007fto.1|uc007ftp.1	Mmp11	17385	chr10:-:75390007:75390092	0	0	0	1
uc007fto.1|uc007ftp.1	Mmp11	17385	chr10:-:75391254:75395079	0	1	0	0
uc007ftq.1|uc007ftr.1	Ndg2	N/A	chr10:+:75398749:75400320	1	0	0	0
uc007ftq.1|uc007ftr.1	Ndg2	N/A	chr10:+:75399190:75400320	0	0	1	0
N/A	N/A	N/A	chr10:+:75495478:75500979	0	0	0	1
uc007ftz.1|uc007fua.1|uc007fub.1	Prmt2	15468	chr10:-:75670538:75672083	0	0	0	1
uc007ftz.1|uc007fua.1|uc007fub.1	Prmt2	15468	chr10:-:75699566:75700495	0	0	6	3
N/A	N/A	N/A	chr10:+:75723335:75723692	0	0	0	1
N/A	N/A	N/A	chr10:+:75723727:75723787	1	0	0	0
uc007fud.1|uc007fue.1|uc007fuf.1|uc007fug.1|uc007fuh.1	Dip2a	64451	chr10:-:75729236:75753753	0	0	0	1
uc007fud.1|uc007fue.1|uc007fuf.1|uc007fug.1|uc007fuh.1	Dip2a	64451	chr10:-:75739185:75742451	0	2	0	0
N/A	N/A	N/A	chr10:-:75749233:75750058	2	0	0	0
N/A	N/A	N/A	chr10:-:75750190:75753753	0	0	0	1
N/A	N/A	N/A	chr10:-:75832824:75837365	2	0	0	0
uc007fuj.1|uc007fuk.1|uc007ful.1|uc007fum.1	Pcnt	18541	chr10:-:75844170:75847486	0	0	1	0
uc007fuj.1|uc007fuk.1|uc007ful.1|uc007fum.1	Pcnt	18541	chr10:-:75847650:75848449	2	1	0	0
N/A	N/A	N/A	chr10:+:75856340:75861146	0	0	0	1
uc007eiq.1	Zc3h12d	237256	chr10:+:7586132:7587062	2	0	0	0
uc007fuj.1|uc007fuk.1|uc007ful.1|uc007fum.1	Pcnt	18541	chr10:-:75862771:75864077	0	4	0	0
uc007fuj.1|uc007fuk.1|uc007ful.1|uc007fum.1	Pcnt	18541	chr10:-:75866389:75866503	1	0	0	0
uc007fuj.1|uc007fuk.1|uc007ful.1|uc007fum.1	Pcnt	18541	chr10:-:75866619:75867167	1	3	0	0
uc007fuj.1|uc007fuk.1|uc007ful.1|uc007fum.1	Pcnt	18541	chr10:-:75872375:75874271	1	0	0	0
uc007fuj.1|uc007fuk.1|uc007ful.1|uc007fum.1	Pcnt	18541	chr10:-:75874503:75874766	0	0	0	1
uc007fuj.1|uc007fuk.1|uc007ful.1|uc007fum.1	Pcnt	18541	chr10:-:75875394:75881105	1	1	0	0
uc007fuj.1|uc007fuk.1|uc007ful.1|uc007fum.1	Pcnt	18541	chr10:-:75881311:75882723	0	0	1	1
N/A	N/A	N/A	chr10:-:75881314:75882723	0	1	0	0
uc007fuj.1|uc007fuk.1|uc007ful.1|uc007fum.1	Pcnt	18541	chr10:-:75889717:75890558	0	1	0	0
uc007fuj.1|uc007fuk.1|uc007ful.1|uc007fum.1	Pcnt	18541	chr10:-:75892056:75895749	2	0	0	0
uc007fuj.1|uc007fuk.1|uc007ful.1|uc007fum.1	Pcnt	18541	chr10:-:75895885:75896352	2	0	0	0
uc007fuj.1|uc007fuk.1|uc007ful.1|uc007fum.1	Pcnt	18541	chr10:-:75896526:75896730	1	1	0	0
uc007fuj.1|uc007fuk.1|uc007ful.1|uc007fum.1	Pcnt	18541	chr10:-:75896785:75899171	1	0	0	0
uc007fuj.1|uc007fuk.1|uc007ful.1|uc007fum.1	Pcnt	18541	chr10:-:75899426:75899890	0	1	0	0
uc007fuj.1|uc007fuk.1|uc007ful.1|uc007fum.1	Pcnt	18541	chr10:-:75899961:75902888	0	0	1	1
N/A	N/A	N/A	chr10:+:76010294:76011965	0	0	0	1
uc007fur.1|uc007fus.1	1700027D21Rik	76573	chr10:+:76026940:76032081	0	1	0	0
uc007fuu.1|uc007fuv.1|uc007fuw.1	Col6a2	12834	chr10:-:76068581:76068917	0	0	1	0
uc007fux.1	Col6a1	12833	chr10:-:76173884:76174028	0	0	1	0
uc007fux.1	Col6a1	12833	chr10:-:76174429:76175013	3	0	0	0
uc007fux.1	Col6a1	12833	chr10:-:76179526:76179874	0	1	0	0
uc007fux.1	Col6a1	12833	chr10:-:76180060:76180145	0	1	0	0
uc007fux.1	Col6a1	12833	chr10:-:76180602:76180804	0	1	0	0
uc007fux.1	Col6a1	12833	chr10:-:76181914:76182368	0	0	1	0
uc007fux.1	Col6a1	12833	chr10:-:76184276:76184561	1	0	0	0
uc007fuy.1|uc007fuz.1|uc007fva.1	Pcbp3	59093	chr10:-:76225271:76247885	0	1	0	0
uc007fuy.1|uc007fuz.1|uc007fva.1	Pcbp3	59093	chr10:-:76233781:76288605	0	2	0	0
uc007fuy.1|uc007fuz.1|uc007fva.1	Pcbp3	59093	chr10:-:76233781:76310481	1	0	0	0
N/A	N/A	N/A	chr10:-:76244618:76247802	0	0	0	2
uc007fuy.1|uc007fuz.1|uc007fva.1	Pcbp3	59093	chr10:-:76247959:76252483	1	0	0	0
N/A	N/A	N/A	chr10:-:76251264:76252446	0	0	1	0
uc007fuy.1|uc007fuz.1|uc007fva.1	Pcbp3	59093	chr10:-:76252614:76288605	0	0	1	0
uc007fuy.1|uc007fuz.1|uc007fva.1	Pcbp3	59093	chr10:-:76288737:76424493	0	0	0	3
uc007fuy.1|uc007fuz.1|uc007fva.1	Pcbp3	59093	chr10:-:76313093:76424493	0	1	0	0
N/A	N/A	N/A	chr10:-:76355401:76368520	0	0	2	1
N/A	N/A	N/A	chr10:-:76355401:76418966	0	1	0	0
uc007fvc.1|uc007fvd.1|uc007fve.1|uc007fvf.1	Slc19a1	20509	chr10:+:76496190:76504561	0	1	0	0
uc007fvg.1|uc007fvh.1	Col18a1	12822	chr10:-:76517015:76517529	0	0	2	1
uc007fvg.1|uc007fvh.1	Col18a1	12822	chr10:-:76518572:76520114	0	0	1	0
uc007fvg.1|uc007fvh.1	Col18a1	12822	chr10:-:76520146:76521444	0	0	0	1
uc007fvg.1|uc007fvh.1	Col18a1	12822	chr10:-:76522147:76522640	0	0	0	1
uc007fvg.1|uc007fvh.1	Col18a1	12822	chr10:-:76526786:76527282	0	0	0	1
uc007fvg.1|uc007fvh.1	Col18a1	12822	chr10:-:76528048:76529695	0	0	2	0
uc007fvg.1|uc007fvh.1	Col18a1	12822	chr10:-:76529769:76530124	0	1	0	0
uc007fvg.1|uc007fvh.1	Col18a1	12822	chr10:-:76530177:76530377	0	0	1	0
uc007fvg.1|uc007fvh.1	Col18a1	12822	chr10:-:76532243:76532565	0	0	1	2
uc007fvg.1|uc007fvh.1	Col18a1	12822	chr10:-:76543609:76543894	0	1	0	0
uc007fvg.1|uc007fvh.1	Col18a1	12822	chr10:-:76543970:76548012	1	0	0	0
uc007fvj.1|uc007fvk.1	Pofut2	80294	chr10:+:76729838:76731272	0	0	1	0
N/A	N/A	N/A	chr10:-:76775271:76776195	0	0	2	1
uc007fvl.1|uc007fvm.1|uc007fvn.1|uc007fvo.1|uc007fvp.1|uc007fvq.1|uc007fvr.1|uc007fvs.1	Adarb1	110532	chr10:-:76822480:76850004	0	0	1	0
N/A	N/A	N/A	chr10:-:76822480:76870294	0	0	0	1
uc007fvv.1|uc007fvw.1	Itgb2	16414	chr10:+:77010041:77011291	0	0	2	1
uc007fvv.1|uc007fvw.1	Itgb2	16414	chr10:+:77011532:77012691	0	0	1	0
uc007fvv.1|uc007fvw.1	Itgb2	16414	chr10:+:77012846:77013718	1	1	0	0
uc007fvv.1|uc007fvw.1	Itgb2	16414	chr10:+:77013813:77018833	1	1	0	0
uc007fvv.1|uc007fvw.1	Itgb2	16414	chr10:+:77018922:77020135	0	0	1	0
uc007fvv.1|uc007fvw.1	Itgb2	16414	chr10:+:77020884:77022224	0	1	0	0
uc007fvv.1|uc007fvw.1	Itgb2	16414	chr10:+:77022468:77022895	0	0	0	3
uc007fvv.1|uc007fvw.1	Itgb2	16414	chr10:+:77023117:77023758	2	0	0	0
N/A	N/A	N/A	chr10:+:77056655:77072557	0	0	1	0
N/A	N/A	N/A	chr10:+:77085563:77093471	0	1	0	0
uc007fwa.1	Ube2g2	22213	chr10:+:77093639:77106214	0	0	1	0
uc007fwe.1|uc007fwg.1	C330046G03Rik	252974	chr10:+:77327627:77329025	2	1	0	0
uc007fwe.1|uc007fwg.1	C330046G03Rik	252974	chr10:+:77343994:77346186	1	0	0	0
uc007fwj.1|uc007fwk.1|uc007fwl.1|uc007fwm.1	Trpm2	28240	chr10:-:77376655:77380452	0	0	0	2
N/A	N/A	N/A	chr10:-:77394279:77394880	0	0	0	1
N/A	N/A	N/A	chr10:-:77395093:77395989	0	1	0	0
N/A	N/A	N/A	chr10:-:77402038:77403892	0	3	0	0
N/A	N/A	N/A	chr10:-:77405735:77406667	0	1	0	0
uc007fwn.1	1810043G02Rik	67884	chr10:+:77441526:77443246	0	1	0	0
N/A	N/A	N/A	chr10:+:77446752:77447164	0	0	1	1
N/A	N/A	N/A	chr10:-:77453051:77453412	0	0	0	1
uc007fwq.1|uc007fwr.1|uc007fws.1|uc007fwt.1|uc007fwu.1|uc007fwv.1|uc007fww.1|uc007fwx.1|uc007fwy.1|uc007fwz.1|uc007fxa.1|uc007fxb.1|uc007fxc.1|uc007fxd.1	Aire	11634	chr10:-:77494634:77497126	0	0	0	1
uc007fwq.1|uc007fwr.1|uc007fws.1|uc007fwt.1|uc007fwu.1|uc007fwv.1|uc007fww.1|uc007fwx.1|uc007fwy.1|uc007fwz.1|uc007fxa.1|uc007fxb.1|uc007fxc.1|uc007fxd.1	Aire	11634	chr10:-:77499529:77500618	1	0	0	0
uc007fxe.1|uc007fxf.1|uc007fxg.1|uc007fxh.1	Dnmt3l	54427	chr10:+:77517811:77519590	0	1	0	0
uc007fxi.1	Icosl	50723	chr10:+:77534836:77536452	0	2	0	0
uc007fxi.1	Icosl	50723	chr10:+:77536745:77537950	0	0	1	0
uc007fxj.1	D10Jhu81e	28295	chr10:-:77626298:77630140	2	0	0	0
uc007fxj.1	D10Jhu81e	28295	chr10:-:77630259:77632118	0	0	0	1
N/A	N/A	N/A	chr10:-:77656279:77659031	1	0	0	0
uc007fxm.1|uc007fxn.1	Tmem1	N/A	chr10:-:77656281:77660483	0	0	0	1
N/A	N/A	N/A	chr10:-:77663589:77664177	0	1	0	0
uc007fxm.1|uc007fxn.1	Tmem1	N/A	chr10:-:77673623:77677313	1	1	0	0
uc007fxo.1|uc007fxp.1|uc007fxq.1|uc007fxr.1	Agpat3	28169	chr10:-:77747095:77750592	1	0	0	0
uc007fxo.1|uc007fxp.1|uc007fxq.1|uc007fxr.1	Agpat3	28169	chr10:-:77750818:77814958	0	1	0	0
N/A	N/A	N/A	chr10:-:77863425:77867726	2	0	0	0
N/A	N/A	N/A	chr10:+:77863501:77863634	2	0	0	0
N/A	N/A	N/A	chr10:-:77863677:77866289	2	0	0	0
uc007fxs.1	Rrp1	18114	chr10:-:77866329:77874149	0	0	0	1
N/A	N/A	N/A	chr10:+:78042547:78043783	0	1	0	0
uc007fxv.1|uc007fxw.1|uc007fxx.1|uc007fxy.1|uc007fxz.1|uc007fya.1	Ilvbl	216136	chr10:+:78046446:78046815	0	0	0	1
uc007fye.1	AK164315	N/A	chr10:+:78210033:78226991	0	0	1	0
uc007fye.1	AK164315	N/A	chr10:+:78227231:78227938	0	0	2	0
N/A	N/A	N/A	chr10:-:78227989:78250479	0	1	0	0
uc007fyg.1	Slc1a6	20513	chr10:+:78243426:78250507	2	15	0	0
uc007fyo.1	2610008E11Rik	72128	chr10:-:78551124:78557176	0	1	0	0
N/A	N/A	N/A	chr10:+:7896133:7911119	1	0	0	0
uc007fyq.1|uc007fyr.1|uc007fys.1|uc007fyt.1|uc007fyu.1	Ppap2c	50784	chr10:-:78993773:78996410	0	1	0	0
N/A	N/A	N/A	chr10:-:79004679:79005123	0	2	0	0
uc007fyv.1|uc007fyw.1|uc007fyx.1|uc007fyy.1	Mier2	70427	chr10:-:79012598:79013061	0	0	0	1
uc007fyv.1|uc007fyw.1|uc007fyx.1|uc007fyy.1	Mier2	70427	chr10:-:79013151:79017819	0	3	0	0
uc007fzd.1	Shc2	216148	chr10:-:79082844:79085000	0	1	0	0
uc007fzd.1	Shc2	216148	chr10:-:79083932:79086572	0	0	1	0
uc007fzd.1	Shc2	216148	chr10:-:79092873:79100194	1	0	0	0
N/A	N/A	N/A	chr10:+:7911255:7912946	0	0	1	0
N/A	N/A	N/A	chr10:-:7915101:7915424	0	1	0	0
uc007fzj.1|uc007fzk.1	Gzmm	16904	chr10:+:79157007:79157096	0	0	0	1
uc007fzj.1|uc007fzk.1	Gzmm	16904	chr10:+:79157362:79157732	0	0	0	1
uc007fzl.1|uc007fzm.1	Bsg	12215	chr10:+:79167329:79171442	0	0	2	0
uc007fzl.1|uc007fzm.1	Bsg	12215	chr10:+:79167329:79173383	0	0	1	0
N/A	N/A	N/A	chr10:+:79167545:79172416	0	3	0	0
N/A	N/A	N/A	chr10:+:79174127:79174239	0	0	2	0
N/A	N/A	N/A	chr10:+:79174484:79174638	0	0	3	0
uc007fzn.1	Hcn2	15166	chr10:+:79189053:79193592	1	1	0	0
uc007fzo.1	Polrmt	216151	chr10:-:79199359:79199479	0	0	2	1
uc007fzo.1	Polrmt	216151	chr10:-:79201195:79201888	0	0	0	1
N/A	N/A	N/A	chr10:-:79222325:79223536	0	0	3	2
N/A	N/A	N/A	chr10:-:79225041:79225227	0	0	3	0
N/A	N/A	N/A	chr10:-:79225450:79229522	0	0	1	0
uc007fzs.1|uc007fzt.1	Fstl3	83554	chr10:+:79240142:79241308	0	0	0	1
uc007fzs.1|uc007fzt.1	Fstl3	83554	chr10:+:79242925:79243869	0	1	0	0
uc007fzs.1|uc007fzt.1	Fstl3	83554	chr10:+:79243470:79243869	0	0	0	1
uc007fzu.1	Prssl1	73106	chr10:-:79247354:79248500	0	0	1	0
uc007fzu.1	Prssl1	73106	chr10:-:79250256:79251588	0	2	0	0
uc007eit.1	Ust	338362	chr10:-:7927468:8017854	0	0	0	1
uc007gab.1|uc007gac.1|uc007gad.1	Ptbp1	19205	chr10:+:79317466:79319249	1	3	0	0
uc007gab.1|uc007gac.1|uc007gad.1	Ptbp1	19205	chr10:+:79322700:79322862	1	1	0	0
uc007gab.1|uc007gac.1|uc007gad.1	Ptbp1	19205	chr10:+:79322700:79325723	0	0	1	0
N/A	N/A	N/A	chr10:+:79322939:79323192	0	1	0	0
uc007gab.1|uc007gac.1|uc007gad.1	Ptbp1	19205	chr10:+:79323714:79325194	0	2	0	0
N/A	N/A	N/A	chr10:+:79336921:79343781	0	1	0	0
uc007gah.1	Prtn3	19152	chr10:+:79343338:79343781	1	1	0	0
uc007gak.1|uc007gal.1|uc007gam.1	Med16	216154	chr10:-:79362154:79365168	0	1	0	0
uc007gak.1|uc007gal.1|uc007gam.1	Med16	216154	chr10:-:79370398:79371563	0	0	0	1
uc007gak.1|uc007gal.1|uc007gam.1	Med16	216154	chr10:-:79370401:79370963	0	0	1	0
N/A	N/A	N/A	chr10:-:79370401:79371251	1	0	0	0
N/A	N/A	N/A	chr10:-:79374766:79374820	1	0	0	0
uc007gan.1	C030046I01Rik	109284	chr10:-:79376091:79379568	0	0	1	1
N/A	N/A	N/A	chr10:-:79376426:79379568	0	1	0	0
N/A	N/A	N/A	chr10:+:79383575:79384303	0	1	0	0
uc007gap.1|uc007gaq.1|uc007gar.1	Arid3a	13496	chr10:+:79390001:79393380	0	0	2	1
uc007gap.1|uc007gaq.1|uc007gar.1	Arid3a	13496	chr10:+:79394033:79394511	1	0	0	0
uc007gap.1|uc007gaq.1|uc007gar.1	Arid3a	13496	chr10:+:79394823:79409230	2	0	0	0
uc007gap.1|uc007gaq.1|uc007gar.1	Arid3a	13496	chr10:+:79412357:79413373	0	0	1	1
uc007gap.1|uc007gaq.1|uc007gar.1	Arid3a	13496	chr10:+:79414091:79414485	1	0	0	0
uc007gas.1|uc007gat.1	Wdr18	216156	chr10:+:79423857:79427955	0	0	1	0
uc007gas.1|uc007gat.1	Wdr18	216156	chr10:+:79427804:79428725	0	0	1	1
N/A	N/A	N/A	chr10:-:79440544:79440933	0	1	0	0
N/A	N/A	N/A	chr10:-:79440565:79440708	0	1	0	0
uc007gaw.1|uc007gax.1|uc007gay.1	ORF61	216157	chr10:-:79440598:79441137	0	0	1	0
uc007gaw.1|uc007gax.1|uc007gay.1	ORF61	216157	chr10:-:79441350:79441613	0	0	0	1
uc007gaz.1	Cnn2	12798	chr10:+:79451485:79454105	0	0	2	1
uc007gaz.1	Cnn2	12798	chr10:+:79455325:79457096	3	0	0	0
uc007gba.1|uc007gbb.1|uc007gbc.1	Abca7	27403	chr10:+:79469973:79470069	1	1	0	0
uc007gba.1|uc007gbb.1|uc007gbc.1	Abca7	27403	chr10:+:79469973:79470399	0	1	0	0
uc007gba.1|uc007gbb.1|uc007gbc.1	Abca7	27403	chr10:+:79470196:79474020	1	0	0	0
uc007gba.1|uc007gbb.1|uc007gbc.1	Abca7	27403	chr10:+:79471311:79471673	1	0	0	0
uc007gba.1|uc007gbb.1|uc007gbc.1	Abca7	27403	chr10:+:79474143:79474660	0	0	0	1
N/A	N/A	N/A	chr10:+:79477301:79477692	0	0	0	1
uc007gba.1|uc007gbb.1|uc007gbc.1	Abca7	27403	chr10:+:79477305:79478051	0	0	1	0
uc007gbd.1|uc007gbe.1|uc007gbf.1|uc007gbg.1|uc007gbh.1	Hmha1	70719	chr10:+:79483780:79483867	1	0	0	0
uc007gbd.1|uc007gbe.1|uc007gbf.1|uc007gbg.1|uc007gbh.1	Hmha1	70719	chr10:+:79484604:79484822	0	0	1	0
uc007gbd.1|uc007gbe.1|uc007gbf.1|uc007gbg.1|uc007gbh.1	Hmha1	70719	chr10:+:79484932:79485020	0	0	3	1
uc007gbd.1|uc007gbe.1|uc007gbf.1|uc007gbg.1|uc007gbh.1	Hmha1	70719	chr10:+:79489302:79489402	1	0	0	0
uc007gbd.1|uc007gbe.1|uc007gbf.1|uc007gbg.1|uc007gbh.1	Hmha1	70719	chr10:+:79490703:79491402	0	0	1	0
uc007gbd.1|uc007gbe.1|uc007gbf.1|uc007gbg.1|uc007gbh.1	Hmha1	70719	chr10:+:79493121:79493477	0	0	1	3
N/A	N/A	N/A	chr10:-:79499583:79499660	0	0	0	1
N/A	N/A	N/A	chr10:+:79516457:79517257	0	1	0	0
uc007gbj.1|uc007gbk.1|uc007gbl.1	Gpx4	625249	chr10:+:79517864:79518785	0	0	1	0
uc007gbm.1|uc007gbn.1|uc007gbo.1|uc007gbp.1|uc007gbq.1|uc007gbr.1|uc007gbs.1	Sbno2	216161	chr10:-:79535263:79545360	0	0	1	0
N/A	N/A	N/A	chr10:-:79544127:79545360	1	1	0	0
uc007gbm.1|uc007gbn.1|uc007gbo.1|uc007gbp.1|uc007gbq.1|uc007gbr.1|uc007gbs.1	Sbno2	216161	chr10:-:79547059:79549002	0	0	0	1
uc007gbt.1|uc007gbu.1|uc007gbv.1	Stk11	20869	chr10:+:79579652:79587547	0	0	2	1
uc007gbt.1|uc007gbu.1|uc007gbv.1	Stk11	20869	chr10:+:79588313:79588978	0	1	0	0
uc007gbt.1|uc007gbu.1|uc007gbv.1	Stk11	20869	chr10:+:79590845:79591136	0	0	1	0
N/A	N/A	N/A	chr10:-:79597178:79597306	0	0	0	2
uc007gbw.1|uc007gbx.1	Dos	216164	chr10:-:79597509:79597863	0	2	0	0
N/A	N/A	N/A	chr10:-:79599239:79599425	0	0	2	0
N/A	N/A	N/A	chr10:-:79600132:79602857	0	0	1	2
N/A	N/A	N/A	chr10:-:79608040:79608183	0	1	0	0
uc007gci.1	Ndufs7	75406	chr10:+:79715178:79717585	0	1	0	0
uc007gci.1	Ndufs7	75406	chr10:+:79716528:79717835	0	0	1	0
N/A	N/A	N/A	chr10:+:79717360:79717585	0	0	0	1
N/A	N/A	N/A	chr10:-:79721843:79721922	0	0	1	1
uc007gcj.1	Gamt	14431	chr10:-:79721989:79722513	0	0	0	2
uc007gck.1|uc007gcl.1|uc007gcm.1	Dazap1	70248	chr10:+:79736792:79737549	3	0	0	0
N/A	N/A	N/A	chr10:-:79755602:79756385	0	1	0	0
N/A	N/A	N/A	chr10:-:79756705:79757641	2	0	0	0
N/A	N/A	N/A	chr10:-:79758546:79759054	1	1	0	0
N/A	N/A	N/A	chr10:+:79762023:79764565	0	0	2	2
uc007gco.1|uc007gcp.1	Apc2	23805	chr10:+:79771075:79773778	0	0	0	1
uc007gct.1|uc007gcu.1	Reep6	70335	chr10:+:79796879:79797855	0	1	0	0
uc007gcv.1|uc007gcw.1	Adamtsl5	66548	chr10:-:79804967:79805654	1	1	0	0
uc007gcv.1|uc007gcw.1	Adamtsl5	66548	chr10:-:79804967:79807578	0	0	1	0
N/A	N/A	N/A	chr10:-:79805235:79805654	0	1	0	0
uc007gcx.1|uc007gcy.1	6330514A18Rik	N/A	chr10:+:79819412:79820729	0	0	1	0
uc007gcx.1|uc007gcy.1	6330514A18Rik	N/A	chr10:+:79821103:79821532	0	1	0	0
uc007gcx.1|uc007gcy.1	6330514A18Rik	N/A	chr10:+:79823311:79823431	2	0	0	0
uc007gcx.1|uc007gcy.1	6330514A18Rik	N/A	chr10:+:79823507:79823867	2	1	0	0
uc007gcx.1|uc007gcy.1	6330514A18Rik	N/A	chr10:+:79823939:79824149	2	1	0	0
uc007gcx.1|uc007gcy.1	6330514A18Rik	N/A	chr10:+:79826890:79826968	1	1	0	0
N/A	N/A	N/A	chr10:-:79855590:79855712	3	3	0	0
N/A	N/A	N/A	chr10:-:79855763:79855835	5	0	0	0
uc007gda.1|uc007gdb.1|uc007gdc.1	Mbd3	17192	chr10:-:79855763:79856638	2	0	0	0
N/A	N/A	N/A	chr10:-:79867031:79869433	1	1	0	0
uc007gdf.1|uc007gdg.1|uc007gdh.1|uc007gdi.1|uc007gdj.1|uc007gdk.1|uc007gdl.1|uc007gdm.1	Tcf3	21423	chr10:-:79873019:79875572	4	2	0	0
uc007gdn.1	Onecut3	246086	chr10:+:79958935:79976602	0	2	0	0
uc007gdo.1|uc007gdp.1	Atp8b3	67331	chr10:-:79983207:79987074	2	3	0	0
uc007gdo.1|uc007gdp.1	Atp8b3	67331	chr10:-:79984642:79984756	0	1	0	0
uc007gdo.1|uc007gdp.1	Atp8b3	67331	chr10:-:79986636:79987074	0	1	0	0
uc007gdo.1|uc007gdp.1	Atp8b3	67331	chr10:-:79991625:79991866	0	0	1	0
uc007gdo.1|uc007gdp.1	Atp8b3	67331	chr10:-:79996093:79996910	1	0	0	0
uc007gdq.1|uc007gdr.1|uc007gds.1	Rexo1	66932	chr10:-:80005226:80006748	2	0	0	0
uc007gdu.1	AK133627	N/A	chr10:+:80041820:80042059	0	0	1	0
uc007gdv.1|uc007gdw.1	D10Bwg1364e	N/A	chr10:-:80047067:80049260	0	0	4	0
uc007gdy.1|uc007gdz.1	Scamp4	56214	chr10:+:80071595:80072386	0	0	3	0
N/A	N/A	N/A	chr10:+:80072169:80072386	0	0	0	1
uc007gdy.1|uc007gdz.1	Scamp4	56214	chr10:+:80072203:80073773	0	0	2	0
uc007gea.1|uc007geb.1	Csnk1g2	103236	chr10:+:80101978:80102767	0	0	0	1
N/A	N/A	N/A	chr10:-:80106436:80106613	2	1	0	0
uc007gee.1|uc007gef.1|uc007geg.1	Mknk2	17347	chr10:-:80134582:80138569	0	0	4	0
N/A	N/A	N/A	chr10:-:80138685:80138868	2	0	0	0
uc007gej.1	9030607L17Rik	71564	chr10:+:80166501:80166784	0	0	1	0
N/A	N/A	N/A	chr10:-:80172046:80172145	0	0	1	0
uc007gek.1	Ap3d1	11776	chr10:-:80173577:80175341	0	0	1	0
N/A	N/A	N/A	chr10:-:80178752:80179219	0	0	0	1
uc007gek.1	Ap3d1	11776	chr10:-:80193699:80204641	0	0	1	1
uc007gel.1|uc007gem.1|uc007gen.1|uc007geo.1|uc007gep.1	Dot1l	208266	chr10:+:80218269:80227347	0	2	0	0
uc007gel.1|uc007gem.1|uc007gen.1|uc007geo.1|uc007gep.1	Dot1l	208266	chr10:+:80244219:80244888	1	0	0	0
uc007gel.1|uc007gem.1|uc007gen.1|uc007geo.1|uc007gep.1	Dot1l	208266	chr10:+:80247401:80247487	0	0	0	1
N/A	N/A	N/A	chr10:-:80260462:80260826	2	0	0	0
N/A	N/A	N/A	chr10:+:80261496:80263941	0	3	0	0
N/A	N/A	N/A	chr10:+:80266259:80266328	0	0	0	1
uc007geu.1|uc007gev.1	Jsrp1	71912	chr10:-:80271784:80271891	0	1	0	0
N/A	N/A	N/A	chr10:+:80291378:80291464	0	0	0	2
uc007gez.1|uc007gfa.1	Lsm7	66094	chr10:-:80315845:80317363	1	1	0	0
N/A	N/A	N/A	chr10:-:80316570:80317363	0	1	0	0
uc007gez.1|uc007gfa.1	Lsm7	66094	chr10:-:80316574:80317926	1	0	0	0
N/A	N/A	N/A	chr10:-:80317453:80317770	0	1	0	0
N/A	N/A	N/A	chr10:+:80325063:80325444	2	2	0	0
uc007gfb.1|uc007gfc.1|uc007gfd.1|uc007gfe.1|uc007gff.1	3110056O03Rik	73218	chr10:+:80328262:80328797	0	0	0	1
uc007gfg.1|uc007gfh.1	Tmprss9	432478	chr10:+:80348924:80350129	0	0	2	0
uc007gfg.1|uc007gfh.1	Tmprss9	432478	chr10:+:80356002:80357036	0	0	0	1
uc007gfg.1|uc007gfh.1	Tmprss9	432478	chr10:+:80357172:80357547	0	1	0	0
uc007gfg.1|uc007gfh.1	Tmprss9	432478	chr10:+:80360114:80360589	0	0	0	2
uc007gfg.1|uc007gfh.1	Tmprss9	432478	chr10:+:80360851:80360930	0	1	0	0
N/A	N/A	N/A	chr10:+:80393499:80393774	0	0	1	0
N/A	N/A	N/A	chr10:+:80488339:80488690	0	0	2	1
uc007gfq.1|uc007gfr.1|uc007gfs.1	Slc39a3	106947	chr10:-:80494445:80497663	0	0	0	1
uc007gft.1|uc007gfu.1	Sgta	52551	chr10:-:80510421:80513744	1	0	0	0
N/A	N/A	N/A	chr10:+:80539795:80540661	0	0	2	0
uc007gfw.1	Creb3l3	208677	chr10:-:80551361:80552052	0	1	0	0
uc007gfw.1	Creb3l3	208677	chr10:-:80552189:80552822	0	1	0	0
uc007gfx.1|uc007gfy.1	Map2k2	26396	chr10:+:80568983:80580897	0	0	0	1
uc007gfx.1|uc007gfy.1	Map2k2	26396	chr10:+:80580974:80582002	2	1	0	0
N/A	N/A	N/A	chr10:+:80585357:80585724	0	0	0	1
N/A	N/A	N/A	chr10:+:80585874:80586365	1	0	0	0
uc007gge.1|uc007ggf.1	Eef2	13629	chr10:+:80640979:80643549	0	1	0	0
uc007gge.1|uc007ggf.1	Eef2	13629	chr10:+:80641637:80642091	0	0	0	1
N/A	N/A	N/A	chr10:+:80643637:80643756	1	0	0	0
N/A	N/A	N/A	chr10:+:80646569:80646721	2	1	0	0
uc007ggg.1|uc007ggh.1|uc007ggi.1|uc007ggj.1|uc007ggk.1	Dapk3	13144	chr10:+:80653391:80654504	1	0	0	0
uc007ggn.1	Itgb1bp3	69564	chr10:-:80663325:80663636	4	2	0	0
uc007ggo.1	Atcay	16467	chr10:-:80669486:80675217	0	0	0	1
N/A	N/A	N/A	chr10:-:80670286:80670579	0	0	1	0
uc007ggo.1	Atcay	16467	chr10:-:80670653:80673269	0	3	0	0
N/A	N/A	N/A	chr10:+:80677687:80681902	0	1	0	0
N/A	N/A	N/A	chr10:+:80693891:80700102	0	0	1	2
uc007ggp.1|uc007ggq.1	9130206N08Rik	N/A	chr10:+:80696506:80700102	1	2	0	0
uc007ggr.1|uc007ggs.1	9130206N08Rik	N/A	chr10:+:80700336:80704740	0	0	1	0
N/A	N/A	N/A	chr10:+:80707525:80708153	0	1	0	0
uc007ggr.1|uc007ggs.1	9130206N08Rik	N/A	chr10:+:80712005:80713382	1	0	0	0
N/A	N/A	N/A	chr10:+:80712526:80713382	0	1	0	0
N/A	N/A	N/A	chr10:+:80717710:80721225	0	1	0	0
uc007ggt.1|uc007ggu.1|uc007ggv.1|uc007ggw.1|uc007ggx.1	Matk	17179	chr10:+:80722551:80723653	2	0	0	0
N/A	N/A	N/A	chr10:+:80734269:80734405	1	0	0	0
N/A	N/A	N/A	chr10:+:80734281:80734407	1	0	0	0
uc007ggz.1	Apba3	57267	chr10:+:80734577:80735329	0	0	0	1
N/A	N/A	N/A	chr10:+:80735136:80735329	0	1	0	0
N/A	N/A	N/A	chr10:+:80735142:80735332	0	0	0	1
uc007gha.1|uc007ghb.1	Tjp3	27375	chr10:-:80736134:80736394	1	0	0	0
uc007gha.1|uc007ghb.1	Tjp3	27375	chr10:-:80736440:80736548	0	0	0	1
uc007gha.1|uc007ghb.1	Tjp3	27375	chr10:-:80740810:80741369	0	1	0	0
N/A	N/A	N/A	chr10:+:80768036:80768444	1	0	0	0
uc007ghc.1|uc007ghd.1|uc007ghe.1	Pip5k1c	18717	chr10:+:80770381:80773424	0	1	0	0
N/A	N/A	N/A	chr10:-:80775329:80775651	3	0	0	0
uc007ghc.1|uc007ghd.1|uc007ghe.1	Pip5k1c	18717	chr10:+:80778701:80780071	0	0	1	0
uc007ghi.1	Gipc3	209047	chr10:-:80801023:80803933	2	0	0	0
uc007ghi.1	Gipc3	209047	chr10:-:80804113:80804236	1	1	0	0
uc007ghi.1	Gipc3	209047	chr10:-:80804421:80805823	1	0	0	0
N/A	N/A	N/A	chr10:-:80809222:80809313	0	0	1	0
uc007gho.1	F630110N24Rik	73822	chr10:+:80824244:80825433	1	0	0	0
uc007gho.1	F630110N24Rik	73822	chr10:+:80825772:80826515	1	1	0	0
uc007ght.1	Fzr1	56371	chr10:-:80830295:80832943	0	1	0	0
N/A	N/A	N/A	chr10:+:80847753:80848464	0	2	0	0
N/A	N/A	N/A	chr10:+:80847842:80848464	0	0	0	2
N/A	N/A	N/A	chr10:+:80848776:80849158	0	0	0	2
uc007ghu.1|uc007ghv.1	Dohh	102115	chr10:+:80850225:80853104	1	1	0	0
uc007ghw.1	2210404O07Rik	72273	chr10:+:80856640:80856833	0	0	1	0
uc007ghw.1	2210404O07Rik	72273	chr10:+:80856895:80857521	0	0	2	0
N/A	N/A	N/A	chr10:-:80862370:80863077	0	1	0	0
uc007gib.1|uc007gic.1|uc007gid.1|uc007gie.1|uc007gif.1	AK158669	N/A	chr10:-:80927165:80928712	0	0	1	0
uc007gib.1|uc007gic.1|uc007gid.1|uc007gie.1|uc007gif.1	AK158669	N/A	chr10:-:80928774:80932189	1	0	0	0
uc007gib.1|uc007gic.1|uc007gid.1|uc007gie.1|uc007gif.1	AK158669	N/A	chr10:-:80930042:80930730	2	3	0	0
uc007gib.1|uc007gic.1|uc007gid.1|uc007gie.1|uc007gif.1	AK158669	N/A	chr10:-:80933502:80934054	0	0	0	1
N/A	N/A	N/A	chr10:-:80954202:80954722	0	1	0	0
uc007gii.1|uc007gij.1	Gna15	14676	chr10:-:80965850:80970673	0	0	1	0
uc007gik.1|uc007gil.1	Gna11	14672	chr10:-:80993990:80995141	0	0	0	1
uc007gim.1|uc007gin.1	Aes	14797	chr10:+:81022413:81028037	3	1	0	0
N/A	N/A	N/A	chr10:+:81022527:81023964	1	0	0	0
uc007gim.1|uc007gin.1	Aes	14797	chr10:+:81024061:81027418	0	1	0	0
N/A	N/A	N/A	chr10:+:81026900:81027416	0	0	1	0
N/A	N/A	N/A	chr10:-:81028542:81028598	0	0	1	0
uc007gio.1|uc007gip.1|uc007giq.1|uc007gir.1|uc007gis.1	Tle2	21886	chr10:+:81039387:81043002	2	0	0	0
uc007gio.1|uc007gip.1|uc007giq.1|uc007gir.1|uc007gis.1	Tle2	21886	chr10:+:81043076:81043229	0	0	0	1
uc007gio.1|uc007gip.1|uc007giq.1|uc007gir.1|uc007gis.1	Tle2	21886	chr10:+:81043076:81043640	0	0	1	0
uc007gio.1|uc007gip.1|uc007giq.1|uc007gir.1|uc007gis.1	Tle2	21886	chr10:+:81043412:81043640	0	0	0	2
uc007gio.1|uc007gip.1|uc007giq.1|uc007gir.1|uc007gis.1	Tle2	21886	chr10:+:81049082:81049603	0	0	0	1
uc007gio.1|uc007gip.1|uc007giq.1|uc007gir.1|uc007gis.1	Tle2	21886	chr10:+:81049118:81049600	2	0	0	0
uc007gio.1|uc007gip.1|uc007giq.1|uc007gir.1|uc007gis.1	Tle2	21886	chr10:+:81051704:81052970	0	0	0	1
uc007git.1|uc007giu.1|uc007giv.1	Tle6	114606	chr10:-:81058300:81058590	3	5	0	0
N/A	N/A	N/A	chr10:-:81059000:81060041	0	2	0	0
uc007git.1|uc007giu.1|uc007giv.1	Tle6	114606	chr10:-:81059000:81061356	1	0	0	0
uc007git.1|uc007giu.1|uc007giv.1	Tle6	114606	chr10:-:81061401:81061822	0	0	2	0
uc007git.1|uc007giu.1|uc007giv.1	Tle6	114606	chr10:-:81062860:81063543	0	0	1	0
uc007giw.1|uc007gix.1	AK140772	N/A	chr10:+:81069135:81069621	0	0	1	0
N/A	N/A	N/A	chr10:-:81084823:81085383	1	0	0	0
N/A	N/A	N/A	chr10:-:81088643:81089173	0	0	0	1
uc007giy.1|uc007giz.1	Sirt6	50721	chr10:-:81089362:81089637	1	0	0	0
uc007gja.1|uc007gjb.1|uc007gjc.1|uc007gjd.1	Ankrd24	70615	chr10:+:81096500:81098433	0	1	0	0
uc007gja.1|uc007gjb.1|uc007gjc.1|uc007gjd.1	Ankrd24	70615	chr10:+:81097730:81097815	2	0	0	0
uc007gja.1|uc007gjb.1|uc007gjc.1|uc007gjd.1	Ankrd24	70615	chr10:+:81102089:81103513	0	1	0	0
uc007gja.1|uc007gjb.1|uc007gjc.1|uc007gjd.1	Ankrd24	70615	chr10:+:81102880:81103513	0	0	0	1
N/A	N/A	N/A	chr10:+:81103557:81103643	0	0	0	1
N/A	N/A	N/A	chr10:+:81109603:81109851	0	1	0	0
N/A	N/A	N/A	chr10:-:81191273:81350333	0	0	0	1
N/A	N/A	N/A	chr10:-:81350369:81483870	0	0	0	1
N/A	N/A	N/A	chr10:+:81449140:81471247	0	0	0	1
N/A	N/A	N/A	chr10:-:81510333:81510634	0	0	3	1
N/A	N/A	N/A	chr10:+:81523910:81526934	0	0	0	1
N/A	N/A	N/A	chr10:+:81523910:81540253	0	0	0	2
N/A	N/A	N/A	chr10:+:81658143:81661883	0	0	1	0
N/A	N/A	N/A	chr10:-:81690663:81703916	1	1	0	0
uc007gjn.1	Mif1	N/A	chr10:+:81831442:81863499	0	0	2	0
N/A	N/A	N/A	chr10:-:82076251:82076855	0	1	0	0
N/A	N/A	N/A	chr10:+:82082960:82085456	2	0	0	0
uc007gjp.1	AK045413	N/A	chr10:-:82085569:82085710	2	0	0	0
uc007gjs.1	Glt8d2	74782	chr10:-:82114263:82115613	2	0	0	0
uc007gjs.1	Glt8d2	74782	chr10:-:82115725:82117427	0	0	2	0
uc007gjs.1	Glt8d2	74782	chr10:-:82117593:82122258	0	0	0	3
uc007gjt.1|uc007gju.1	Hcfc2	67933	chr10:+:82165348:82171754	0	0	1	3
uc007gjy.1|uc007gjz.1|uc007gka.1|uc007gkb.1|uc007gkd.1	Txnrd1	50493	chr10:+:82322045:82337358	0	0	0	3
uc007gjy.1|uc007gjz.1|uc007gka.1|uc007gkb.1|uc007gkd.1	Txnrd1	50493	chr10:+:82336020:82337358	0	1	0	0
uc007gkf.1	Slc41a2	338365	chr10:-:82696495:82744115	0	0	0	1
uc007gkf.1	Slc41a2	338365	chr10:-:82696495:82776160	0	1	0	0
uc007gkf.1	Slc41a2	338365	chr10:-:82767120:82800505	0	1	0	0
uc007gkh.1|uc007gki.1	Aldh1l2	216188	chr10:-:82962683:82964639	0	1	0	0
uc007gkh.1|uc007gki.1	Aldh1l2	216188	chr10:-:82978927:82981089	0	0	3	2
uc007gkh.1|uc007gki.1	Aldh1l2	216188	chr10:-:82981479:82983015	0	0	3	0
uc007gkj.1	A230046K03Rik	319277	chr10:+:83012409:83013626	0	0	2	0
uc007gkj.1	A230046K03Rik	319277	chr10:+:83018360:83021343	0	0	2	0
uc007gkj.1	A230046K03Rik	319277	chr10:+:83043106:83046000	0	0	3	0
uc007gkj.1	A230046K03Rik	319277	chr10:+:83051049:83054434	0	1	0	0
N/A	N/A	N/A	chr10:-:83063572:83064628	0	0	1	1
uc007gkk.1	Appl2	216190	chr10:-:83068679:83071682	0	0	2	0
N/A	N/A	N/A	chr10:-:83077040:83080092	0	0	3	0
uc007gkk.1	Appl2	216190	chr10:-:83077047:83083443	3	0	0	0
N/A	N/A	N/A	chr10:-:83091578:83092423	0	1	0	0
uc007gkl.1|uc007gkm.1	AK153590	N/A	chr10:+:83185779:83220190	0	0	1	0
uc007gkl.1|uc007gkm.1	AK153590	N/A	chr10:+:83220225:83220879	0	0	1	0
uc007gkt.1|uc007gku.1	Polr3b	70428	chr10:+:84137464:84142491	0	0	1	0
uc007gkt.1|uc007gku.1	Polr3b	70428	chr10:+:84159811:84162144	0	0	1	0
uc007gkv.1|uc007gkw.1	Rfx4	71137	chr10:+:84242846:84261273	0	0	1	0
uc007gkv.1|uc007gkw.1	Rfx4	71137	chr10:+:84307109:84321242	0	0	0	1
uc007gkv.1|uc007gkw.1	Rfx4	71137	chr10:+:84331707:84342915	0	0	1	1
uc007gkv.1|uc007gkw.1	Rfx4	71137	chr10:+:84343034:84343558	1	2	0	0
uc007gkv.1|uc007gkw.1	Rfx4	71137	chr10:+:84343719:84356945	2	0	0	0
uc007gkx.1|uc007gky.1|uc007gkz.1	Ric8b	237422	chr10:+:84380570:84454865	0	0	1	0
uc007gkx.1|uc007gky.1|uc007gkz.1	Ric8b	237422	chr10:+:84432836:84442793	0	0	1	0
N/A	N/A	N/A	chr10:+:84467607:84477821	0	0	3	0
uc007gkx.1|uc007gky.1|uc007gkz.1	Ric8b	237422	chr10:+:84471538:84472197	0	0	1	0
uc007gkx.1|uc007gky.1|uc007gkz.1	Ric8b	237422	chr10:+:84472372:84477821	1	1	0	0
uc007glb.1|uc007glc.1	AI597468	103266	chr10:+:84577632:84582966	0	0	0	2
uc007eiu.1|uc007eiv.1	Sash1	70097	chr10:-:8460181:8461226	0	0	3	2
uc007eiu.1|uc007eiv.1	Sash1	70097	chr10:-:8471283:8476427	3	0	0	0
N/A	N/A	N/A	chr10:-:8476559:8477212	0	3	0	0
uc007eiu.1|uc007eiv.1	Sash1	70097	chr10:-:8504108:8506146	0	0	0	1
uc007eiu.1|uc007eiv.1	Sash1	70097	chr10:-:8509399:8534039	0	1	0	0
uc007glg.1|uc007glh.1|uc007gli.1	Btbd11	74007	chr10:+:85110538:85117223	0	1	0	0
N/A	N/A	N/A	chr10:+:85292594:85337023	1	0	0	0
uc007eiu.1|uc007eiv.1	Sash1	70097	chr10:-:8534088:8534205	0	0	4	1
N/A	N/A	N/A	chr10:-:85356182:85361920	0	2	0	0
uc007gne.1|uc007gnf.1|uc007gng.1	Prdm4	72843	chr10:-:85370815:85372968	0	0	1	0
uc007gne.1|uc007gnf.1|uc007gng.1	Prdm4	72843	chr10:-:85373153:85379269	0	1	0	0
uc007gnj.1	Bpil2	270757	chr10:-:85438184:85438939	0	0	1	1
uc007gnj.1	Bpil2	270757	chr10:-:85440499:85441922	0	0	1	2
uc007gnj.1	Bpil2	270757	chr10:-:85454054:85456073	0	0	1	0
uc007gnj.1	Bpil2	270757	chr10:-:85458810:85463261	0	1	0	0
uc007gnk.1|uc007gnl.1|uc007gnm.1	Fbxo7	69754	chr10:+:85485075:85487313	0	1	0	0
uc007gnk.1|uc007gnl.1|uc007gnm.1	Fbxo7	69754	chr10:+:85487455:85495979	0	1	0	0
uc007gnk.1|uc007gnl.1|uc007gnm.1	Fbxo7	69754	chr10:+:85496065:85507168	4	0	0	0
uc007gno.1|uc007gnp.1|uc007gns.1|uc007gnt.1|uc007gnu.1	Syn3	27204	chr10:-:85526794:85531771	0	0	0	1
N/A	N/A	N/A	chr10:+:85650830:85652258	0	1	0	0
N/A	N/A	N/A	chr10:-:85661843:85814296	5	0	0	0
uc007eiu.1|uc007eiv.1	Sash1	70097	chr10:-:8570289:8605522	1	0	0	0
uc007gno.1|uc007gnp.1|uc007gns.1|uc007gnt.1|uc007gnu.1	Syn3	27204	chr10:-:85930180:85940411	0	2	0	0
uc007gno.1|uc007gnp.1|uc007gns.1|uc007gnt.1|uc007gnu.1	Syn3	27204	chr10:-:85930180:85954499	1	0	0	0
N/A	N/A	N/A	chr10:-:85930180:85960767	0	0	0	1
uc007gqi.1	Hsp90b1	22027	chr10:-:86154493:86157095	0	1	0	0
uc007gqi.1	Hsp90b1	22027	chr10:-:86154493:86161064	0	1	0	0
uc007gqj.1|uc007gqk.1|uc007gql.1	BC030307	103220	chr10:+:86168762:86169981	1	0	0	0
N/A	N/A	N/A	chr10:+:86171646:86175510	0	0	2	0
uc007gqj.1|uc007gqk.1|uc007gql.1	BC030307	103220	chr10:+:86182409:86186943	0	0	2	1
uc007gqj.1|uc007gqk.1|uc007gql.1	BC030307	103220	chr10:+:86196539:86199546	0	1	0	0
uc007gqj.1|uc007gqk.1|uc007gql.1	BC030307	103220	chr10:+:86199744:86207171	0	0	1	0
uc007gqj.1|uc007gqk.1|uc007gql.1	BC030307	103220	chr10:+:86213131:86221003	1	0	0	0
uc007gqj.1|uc007gqk.1|uc007gql.1	BC030307	103220	chr10:+:86221174:86221834	1	0	0	0
uc007gqj.1|uc007gqk.1|uc007gql.1	BC030307	103220	chr10:+:86221981:86223511	0	0	1	0
uc007gqj.1|uc007gqk.1|uc007gql.1	BC030307	103220	chr10:+:86223663:86226609	0	0	0	1
uc007gqj.1|uc007gqk.1|uc007gql.1	BC030307	103220	chr10:+:86238804:86238900	0	2	0	0
N/A	N/A	N/A	chr10:+:86242591:86267526	0	1	0	0
uc007gqm.1|uc007gqn.1	Nt5dc3	103466	chr10:+:86288040:86296676	0	1	0	0
uc007gqo.1	Stab2	192188	chr10:-:86329982:86331767	0	2	0	0
uc007gqo.1	Stab2	192188	chr10:-:86334697:86335342	0	0	2	0
uc007gqt.1	Pah	18478	chr10:+:87001070:87017091	1	0	0	0
uc007gqt.1	Pah	18478	chr10:+:87033088:87033971	0	0	0	1
uc007gqt.1	Pah	18478	chr10:+:87034040:87038902	0	0	0	1
uc007gqt.1	Pah	18478	chr10:+:87038958:87041005	0	0	0	1
uc007gqt.1	Pah	18478	chr10:+:87041100:87041598	0	0	0	1
uc007gqv.1|uc007gqw.1|uc007gqx.1|uc007gqy.1|uc007gqz.1|uc007gra.1	Igf1	16000	chr10:+:87324130:87327476	0	0	1	0
uc007gqv.1|uc007gqw.1|uc007gqx.1|uc007gqy.1|uc007gqz.1|uc007gra.1	Igf1	16000	chr10:+:87378094:87393420	0	1	0	0
uc007grd.1	4930547N16Rik	75317	chr10:-:87555931:87556340	0	0	3	2
uc007grd.1	4930547N16Rik	75317	chr10:-:87573125:87574341	0	0	0	1
uc007grd.1	4930547N16Rik	75317	chr10:-:87577446:87587553	0	0	0	2
uc007grd.1	4930547N16Rik	75317	chr10:-:87587707:87588902	0	0	0	1
uc007grd.1	4930547N16Rik	75317	chr10:-:87595943:87602611	0	0	1	0
uc007grd.1	4930547N16Rik	75317	chr10:-:87602841:87606685	0	0	3	0
uc007grd.1	4930547N16Rik	75317	chr10:-:87606840:87609241	0	0	0	1
uc007gre.1|uc007grf.1	Nup37	69736	chr10:+:87609914:87610907	0	0	0	1
uc007grg.1|uc007grh.1	Ccdc53	67282	chr10:+:87676457:87681995	0	0	0	1
uc007grg.1|uc007grh.1	Ccdc53	67282	chr10:+:87682105:87687777	0	0	0	1
uc007gri.1|uc007grj.1	1200002N14Rik	N/A	chr10:-:87791886:87799556	0	2	0	0
uc007gri.1|uc007grj.1	1200002N14Rik	N/A	chr10:-:87799733:87803265	0	0	0	1
N/A	N/A	N/A	chr10:-:87807456:87822124	1	0	0	0
uc007grk.1|uc007grl.1	Gnptab	432486	chr10:+:87898946:87899097	0	0	0	1
uc007grm.1|uc007grn.1|uc007gro.1	Sycp3	20962	chr10:+:87926171:87926581	0	2	0	0
N/A	N/A	N/A	chr10:-:87939908:87944972	0	0	1	0
uc007grt.1|uc007gru.1	8030451F13Rik	N/A	chr10:-:87981314:87982646	1	0	0	0
uc007grt.1|uc007gru.1	8030451F13Rik	N/A	chr10:-:87985898:87987714	0	0	0	1
uc007grt.1|uc007gru.1	8030451F13Rik	N/A	chr10:-:87992309:87994414	1	0	0	0
uc007grt.1|uc007gru.1	8030451F13Rik	N/A	chr10:-:87994609:87996230	0	0	0	1
uc007grt.1|uc007gru.1	8030451F13Rik	N/A	chr10:-:88005261:88006463	0	1	0	0
uc007grt.1|uc007gru.1	8030451F13Rik	N/A	chr10:-:88016167:88017409	0	0	1	0
uc007grt.1|uc007gru.1	8030451F13Rik	N/A	chr10:-:88033401:88034265	0	1	0	0
uc007grv.1	Spic	20728	chr10:-:88141381:88142604	0	0	3	0
uc007grv.1	Spic	20728	chr10:-:88142700:88143224	0	0	0	1
uc007grv.1	Spic	20728	chr10:-:88143319:88145720	0	1	0	0
N/A	N/A	N/A	chr10:+:88204830:88205773	0	0	0	1
uc007grx.1	DRIM	N/A	chr10:-:88217404:88217496	4	0	0	0
uc007grx.1	DRIM	N/A	chr10:-:88235313:88235597	1	3	0	0
uc007grx.1	DRIM	N/A	chr10:-:88237569:88237670	1	2	0	0
N/A	N/A	N/A	chr10:-:88240294:88240968	0	0	5	3
N/A	N/A	N/A	chr10:-:88241191:88243693	0	2	0	0
N/A	N/A	N/A	chr10:-:88245461:88248735	2	1	0	0
N/A	N/A	N/A	chr10:-:88250366:88253796	0	2	0	0
N/A	N/A	N/A	chr10:-:88254514:88255344	0	2	0	0
N/A	N/A	N/A	chr10:-:88255434:88258122	1	1	0	0
uc007gry.1	Utp20	70683	chr10:-:88258310:88261026	0	0	2	1
uc007gry.1	Utp20	70683	chr10:-:88263938:88267268	1	0	0	0
uc007gry.1	Utp20	70683	chr10:-:88267426:88268881	0	0	1	0
uc007gry.1	Utp20	70683	chr10:-:88268943:88270072	1	0	0	0
uc007gry.1	Utp20	70683	chr10:-:88270222:88271827	0	0	3	0
uc007gry.1	Utp20	70683	chr10:-:88272548:88272675	0	0	0	2
uc007gry.1	Utp20	70683	chr10:-:88272830:88276662	0	0	1	1
uc007gry.1	Utp20	70683	chr10:-:88280766:88281234	0	0	2	0
uc007gry.1	Utp20	70683	chr10:-:88284617:88284749	0	1	0	0
uc007gry.1	Utp20	70683	chr10:-:88284815:88288163	0	0	1	0
uc007gry.1	Utp20	70683	chr10:-:88288243:88289351	0	1	0	0
uc007grz.1	Slc5a8	216225	chr10:+:88364202:88365159	1	0	0	0
uc007grz.1	Slc5a8	216225	chr10:+:88367802:88369022	0	0	1	0
uc007grz.1	Slc5a8	216225	chr10:+:88369151:88370712	0	0	0	1
uc007grz.1	Slc5a8	216225	chr10:+:88370800:88372329	0	0	1	0
uc007grz.1	Slc5a8	216225	chr10:+:88372441:88374097	0	0	0	1
uc007grz.1	Slc5a8	216225	chr10:+:88384524:88388451	0	2	0	0
N/A	N/A	N/A	chr10:-:88423458:88434013	0	2	0	0
uc007gsa.1|uc007gsb.1|uc007gsc.1	Tmem16d	N/A	chr10:-:88435636:88443689	1	0	0	0
uc007gsa.1|uc007gsb.1|uc007gsc.1	Tmem16d	N/A	chr10:-:88445033:88579611	0	1	0	0
uc007gsa.1|uc007gsb.1|uc007gsc.1	Tmem16d	N/A	chr10:-:88497926:88547292	0	1	0	0
N/A	N/A	N/A	chr10:-:88575690:88579611	1	0	0	0
N/A	N/A	N/A	chr10:-:88780087:88789995	0	0	1	0
uc007gsd.1|uc007gse.1	Gas2l3	237436	chr10:-:88891890:88893629	0	2	0	0
uc007gsd.1|uc007gse.1	Gas2l3	237436	chr10:-:88896557:88897038	0	0	0	1
uc007gsd.1|uc007gse.1	Gas2l3	237436	chr10:-:88897106:88899248	3	0	0	0
uc007gsd.1|uc007gse.1	Gas2l3	237436	chr10:-:88899354:88906600	1	0	0	0
uc007gsf.1|uc007gsg.1|uc007gsh.1|uc007gsi.1	Nr1h4	20186	chr10:-:88936643:88941095	0	1	0	0
uc007gsf.1|uc007gsg.1|uc007gsh.1|uc007gsi.1	Nr1h4	20186	chr10:-:88946269:88960794	1	0	0	0
uc007gsf.1|uc007gsg.1|uc007gsh.1|uc007gsi.1	Nr1h4	20186	chr10:-:88979316:88996148	0	0	1	0
uc007gsj.1|uc007gsk.1	Slc17a8	216227	chr10:-:89046251:89052241	1	1	0	0
uc007gsj.1|uc007gsk.1	Slc17a8	216227	chr10:-:89054906:89055621	0	0	1	0
uc007gsj.1|uc007gsk.1	Slc17a8	216227	chr10:-:89069613:89083544	0	1	0	0
uc007gsl.1|uc007gsm.1|uc007gsn.1|uc007gso.1|uc007gsp.1	Scyl2	213326	chr10:-:89103861:89119453	0	0	0	1
uc007gsq.1|uc007gsr.1	AK085365	N/A	chr10:+:89152067:89160908	1	0	0	0
uc007gsu.1|uc007gsv.1|uc007gsw.1|uc007gsx.1	mKIAA0701	N/A	chr10:+:89208033:89218166	0	1	0	0
uc007gsu.1|uc007gsv.1|uc007gsw.1|uc007gsx.1	mKIAA0701	N/A	chr10:+:89218299:89235332	0	0	0	1
uc007gsu.1|uc007gsv.1|uc007gsw.1|uc007gsx.1	mKIAA0701	N/A	chr10:+:89236863:89242580	0	0	1	0
uc007gsu.1|uc007gsv.1|uc007gsw.1|uc007gsx.1	mKIAA0701	N/A	chr10:+:89254226:89265764	0	0	0	1
N/A	N/A	N/A	chr10:+:89274686:89274789	0	0	0	1
N/A	N/A	N/A	chr10:+:89505447:89512561	3	3	0	0
uc007gsy.1	AK036288	N/A	chr10:+:89533914:89536724	2	0	0	0
N/A	N/A	N/A	chr10:+:89975620:90039834	0	0	1	1
N/A	N/A	N/A	chr10:+:90039420:90039834	1	0	0	0
N/A	N/A	N/A	chr10:+:90159814:90357844	0	0	0	1
N/A	N/A	N/A	chr10:+:90236835:90357844	0	0	1	0
uc007gsz.1|uc007gta.1|uc007gtb.1|uc007gtc.1|uc007gtd.1	Anks1b	77531	chr10:+:90292842:90357844	0	0	1	1
N/A	N/A	N/A	chr10:+:90386347:90404171	0	0	3	0
N/A	N/A	N/A	chr10:+:90429137:90432533	0	0	2	1
uc007gtg.1|uc007gth.1|uc007gti.1|uc007gtj.1|uc007gtk.1	Apaf1	11783	chr10:-:90462522:90463755	0	0	1	2
uc007gtg.1|uc007gth.1|uc007gti.1|uc007gtj.1|uc007gtk.1	Apaf1	11783	chr10:-:90471994:90476805	0	0	2	0
uc007gtg.1|uc007gth.1|uc007gti.1|uc007gtj.1|uc007gtk.1	Apaf1	11783	chr10:-:90483526:90494294	0	0	1	0
uc007gtg.1|uc007gth.1|uc007gti.1|uc007gtj.1|uc007gtk.1	Apaf1	11783	chr10:-:90494455:90499655	0	0	0	1
uc007gtg.1|uc007gth.1|uc007gti.1|uc007gtj.1|uc007gtk.1	Apaf1	11783	chr10:-:90499780:90502530	1	2	0	0
uc007gtg.1|uc007gth.1|uc007gti.1|uc007gtj.1|uc007gtk.1	Apaf1	11783	chr10:-:90510956:90512103	0	1	0	0
uc007gtg.1|uc007gth.1|uc007gti.1|uc007gtj.1|uc007gtk.1	Apaf1	11783	chr10:-:90512229:90517125	1	1	0	0
uc007gtg.1|uc007gth.1|uc007gti.1|uc007gtj.1|uc007gtk.1	Apaf1	11783	chr10:-:90521187:90522318	0	0	0	1
uc007gtg.1|uc007gth.1|uc007gti.1|uc007gtj.1|uc007gtk.1	Apaf1	11783	chr10:-:90522485:90522793	0	1	0	0
uc007gtg.1|uc007gth.1|uc007gti.1|uc007gtj.1|uc007gtk.1	Apaf1	11783	chr10:-:90524574:90524849	0	1	0	0
uc007gtg.1|uc007gth.1|uc007gti.1|uc007gtj.1|uc007gtk.1	Apaf1	11783	chr10:-:90524961:90529826	0	1	0	0
uc007gtg.1|uc007gth.1|uc007gti.1|uc007gtj.1|uc007gtk.1	Apaf1	11783	chr10:-:90530009:90540279	0	0	0	1
uc007gtg.1|uc007gth.1|uc007gti.1|uc007gtj.1|uc007gtk.1	Apaf1	11783	chr10:-:90542381:90542632	0	1	0	0
uc007gtl.1|uc007gtm.1	1200009F10Rik	N/A	chr10:+:90556001:90558529	0	0	0	1
N/A	N/A	N/A	chr10:+:90563087:90564500	1	2	0	0
N/A	N/A	N/A	chr10:+:90563213:90564500	0	0	1	0
N/A	N/A	N/A	chr10:-:90579869:90579972	0	0	0	1
uc007gtn.1|uc007gto.1	Slc25a3	18674	chr10:-:90579869:90580789	0	1	0	0
N/A	N/A	N/A	chr10:-:90580961:90581440	1	1	0	0
uc007gtn.1|uc007gto.1	Slc25a3	18674	chr10:-:90581625:90584667	0	0	1	0
uc007gtn.1|uc007gto.1	Slc25a3	18674	chr10:-:90582451:90586303	0	0	0	1
uc007gtp.1|uc007gtq.1|uc007gtr.1|uc007gts.1|uc007gtt.1|uc007gtu.1|uc007gtv.1|uc007gtw.1	Tmpo	21917	chr10:-:90615925:90616023	4	1	0	0
uc007gtp.1|uc007gtq.1|uc007gtr.1|uc007gts.1|uc007gtt.1|uc007gtu.1|uc007gtv.1|uc007gtw.1	Tmpo	21917	chr10:-:90626106:90626788	2	5	0	0
N/A	N/A	N/A	chr10:-:90721661:90721833	0	0	1	0
N/A	N/A	N/A	chr10:-:91538418:91546619	0	0	2	0
uc007gtz.1|uc007gua.1|uc007gub.1|uc007guc.1	AK086758	N/A	chr10:-:91596093:91596498	0	1	0	0
N/A	N/A	N/A	chr10:-:91597840:91598446	0	0	3	2
uc007gtz.1|uc007gua.1|uc007gub.1|uc007guc.1	AK086758	N/A	chr10:-:91598554:91599302	0	0	1	0
uc007gtz.1|uc007gua.1|uc007gub.1|uc007guc.1	AK086758	N/A	chr10:-:91627517:91627843	0	1	0	0
uc007gud.1|uc007gue.1	Nedd1	17997	chr10:-:92153529:92154579	0	1	0	0
uc007gud.1|uc007gue.1	Nedd1	17997	chr10:-:92155680:92157725	0	0	1	1
uc007gud.1|uc007gue.1	Nedd1	17997	chr10:-:92157853:92160915	0	0	0	1
uc007gud.1|uc007gue.1	Nedd1	17997	chr10:-:92161110:92161471	0	1	0	0
uc007gud.1|uc007gue.1	Nedd1	17997	chr10:-:92163694:92173916	0	0	0	1
uc007gud.1|uc007gue.1	Nedd1	17997	chr10:-:92176935:92178911	0	0	1	1
uc007gud.1|uc007gue.1	Nedd1	17997	chr10:-:92182374:92185068	1	0	0	0
uc007guf.1	BC065048	N/A	chr10:-:92278767:92283770	1	0	0	0
uc007guf.1	BC065048	N/A	chr10:-:92292565:92299063	0	0	1	1
N/A	N/A	N/A	chr10:-:92450198:92457367	0	2	0	0
uc007guh.1|uc007gui.1|uc007guj.1	4930485B16Rik	380654	chr10:-:92507873:92507999	0	0	0	1
uc007guk.1|uc007gul.1|uc007gum.1	Pctk2	N/A	chr10:+:92700629:92702333	1	0	0	0
uc007gun.1	Elk3	13713	chr10:-:92747722:92773497	0	0	0	1
N/A	N/A	N/A	chr10:+:92810483:92810804	0	0	1	0
uc007gup.1	AK144329	N/A	chr10:+:92810947:92811024	0	2	0	0
uc007guq.1|uc007gur.1	Lta4h	16993	chr10:+:92931933:92935644	0	1	0	0
uc007guq.1|uc007gur.1	Lta4h	16993	chr10:+:92933568:92934599	0	0	1	0
uc007gus.1	Hal	15109	chr10:+:92966314:92970160	0	0	1	0
uc007gut.1	Amdhd1	71761	chr10:-:92990466:92994223	0	0	0	1
uc007gut.1	Amdhd1	71761	chr10:-:93000110:93002579	1	0	0	0
uc007guu.1|uc007guv.1	Ccdc38	237465	chr10:+:93042712:93044478	0	1	0	0
uc007gvb.1	AK041893	N/A	chr10:+:93319064:93320474	0	1	0	0
uc007gvc.1|uc007gvd.1|uc007gve.1|uc007gvf.1	Metap2	56307	chr10:-:93325237:93325675	4	2	0	0
N/A	N/A	N/A	chr10:-:93349846:93351849	0	0	0	1
N/A	N/A	N/A	chr10:-:93433422:93436580	3	1	0	0
N/A	N/A	N/A	chr10:-:93447226:93452885	0	0	1	0
uc007gvh.1|uc007gvi.1|uc007gvj.1|uc007gvk.1|uc007gvl.1	Vezt	215008	chr10:-:93457757:93459583	0	0	0	1
uc007gvm.1	Fgd6	13998	chr10:+:93508378:93536928	0	0	2	0
uc007gvm.1	Fgd6	13998	chr10:+:93563298:93565987	2	0	0	0
uc007gvm.1	Fgd6	13998	chr10:+:93583248:93585984	0	0	1	0
uc007gvm.1	Fgd6	13998	chr10:+:93586042:93586289	0	1	0	0
uc007gvm.1	Fgd6	13998	chr10:+:93588377:93590114	1	0	0	0
uc007gvm.1	Fgd6	13998	chr10:+:93590193:93596025	1	0	0	0
uc007gvm.1	Fgd6	13998	chr10:+:93596889:93597762	1	1	0	0
uc007gvm.1	Fgd6	13998	chr10:+:93597864:93600181	0	0	2	0
uc007gvm.1	Fgd6	13998	chr10:+:93600308:93601029	1	0	0	0
uc007gvm.1	Fgd6	13998	chr10:+:93601157:93602484	0	0	0	1
N/A	N/A	N/A	chr10:+:93611949:93619652	0	0	0	1
uc007gvn.1|uc007gvo.1|uc007gvp.1	Nr2c1	22025	chr10:+:93634882:93650894	3	0	0	0
uc007gvq.1	Ndufa12	66414	chr10:+:93661875:93666033	0	0	2	2
N/A	N/A	N/A	chr10:+:93893384:94041168	1	2	0	0
N/A	N/A	N/A	chr10:+:94179650:94181597	2	0	0	0
N/A	N/A	N/A	chr10:+:94249599:94251392	0	0	0	1
uc007gvz.2	Plxnc1	54712	chr10:-:94257235:94257331	3	4	0	0
uc007gvz.2	Plxnc1	54712	chr10:-:94259262:94260729	2	2	0	0
uc007gvz.2	Plxnc1	54712	chr10:-:94306653:94306816	0	0	1	0
uc007gvz.2	Plxnc1	54712	chr10:-:94307019:94310149	0	0	0	1
uc007gvz.2	Plxnc1	54712	chr10:-:94312635:94315223	0	0	0	1
uc007gvz.2	Plxnc1	54712	chr10:-:94329632:94333609	0	0	3	0
uc007gvz.2	Plxnc1	54712	chr10:-:94333753:94345152	1	2	0	0
uc007gvz.2	Plxnc1	54712	chr10:-:94345266:94369099	0	1	0	0
uc007gwa.1|uc007gwb.1|uc007gwc.1|uc007gwd.1	Cradd	12905	chr10:-:94785523:94786103	0	1	0	0
uc007gwa.1|uc007gwb.1|uc007gwc.1|uc007gwd.1	Cradd	12905	chr10:-:94785523:94786619	0	0	0	1
uc007gwf.1|uc007gwg.1	Socs2	216233	chr10:-:94851029:94851524	0	0	1	2
uc007gwf.1|uc007gwg.1	Socs2	216233	chr10:-:94853279:94855048	1	1	0	0
uc007gwf.1|uc007gwg.1	Socs2	216233	chr10:-:94875744:94877465	0	1	0	0
uc007gwh.1	AK017586	N/A	chr10:+:94884309:94890772	0	0	0	1
N/A	N/A	N/A	chr10:+:94943607:94952876	0	0	0	1
uc007gwi.1|uc007gwj.1|uc007gwk.1|uc007gwl.1	D10Ertd322e	N/A	chr10:-:94943611:94952880	0	0	1	0
N/A	N/A	N/A	chr10:-:94953215:94953421	0	0	1	0
N/A	N/A	N/A	chr10:-:94953215:94956265	0	0	10	2
N/A	N/A	N/A	chr10:-:94953496:94956265	0	0	2	0
N/A	N/A	N/A	chr10:-:94953500:94956265	0	0	1	1
uc007gwi.1|uc007gwj.1|uc007gwk.1|uc007gwl.1	D10Ertd322e	N/A	chr10:-:94963156:94964524	0	1	0	0
N/A	N/A	N/A	chr10:-:94964647:94966588	0	0	1	0
N/A	N/A	N/A	chr10:+:94977871:94978289	0	0	0	1
uc007gwm.1|uc007gwn.1	Ube2n	93765	chr10:+:94977871:95003839	1	0	0	0
uc007eiy.1|uc007eiz.1|uc007eja.1|uc007ejb.1|uc007ejc.1	Stxbp5	78808	chr10:-:9497869:9503986	1	0	0	0
uc007gwm.1|uc007gwn.1	Ube2n	93765	chr10:+:95004012:95004272	0	0	0	1
uc007eiy.1|uc007eiz.1|uc007eja.1|uc007ejb.1|uc007ejc.1	Stxbp5	78808	chr10:-:9504198:9509161	2	0	0	0
N/A	N/A	N/A	chr10:-:9509226:9516736	0	0	0	2
N/A	N/A	N/A	chr10:-:9516819:9517920	0	0	0	1
uc007gwr.1	AK133093	N/A	chr10:+:95197562:95201708	2	2	0	0
N/A	N/A	N/A	chr10:+:95356326:95356835	2	0	0	0
N/A	N/A	N/A	chr10:+:95356923:95359346	4	1	0	0
uc007gwu.1|uc007gwv.1	Eea1	216238	chr10:+:95453099:95456058	1	1	0	0
N/A	N/A	N/A	chr10:+:95459726:95462985	0	0	3	0
uc007gwu.1|uc007gwv.1	Eea1	216238	chr10:+:95489787:95494145	1	0	0	0
uc007gwu.1|uc007gwv.1	Eea1	216238	chr10:+:95491221:95494145	0	2	0	0
uc007gwx.1|uc007gwy.1	Dcn	13179	chr10:+:96945181:96945973	0	0	0	1
uc007gwx.1|uc007gwy.1	Dcn	13179	chr10:+:96946192:96969127	0	0	0	1
uc007gwz.1	Lum	17022	chr10:+:97028519:97030858	0	1	0	0
N/A	N/A	N/A	chr10:-:97145292:97215140	2	0	0	0
N/A	N/A	N/A	chr10:-:97215246:97270122	3	0	0	0
N/A	N/A	N/A	chr10:+:97473102:97477932	0	0	1	0
N/A	N/A	N/A	chr10:+:97478036:97533556	0	2	0	0
N/A	N/A	N/A	chr10:+:97578859:97599421	0	1	0	0
uc007gxf.1|uc007gxg.1	Atp2b1	67972	chr10:+:98478329:98481349	0	1	0	0
N/A	N/A	N/A	chr10:+:98481998:98485442	0	0	0	1
uc007gxh.1|uc007gxi.1	Wdr51b	N/A	chr10:+:98569857:98570426	0	1	0	0
uc007gxh.1|uc007gxi.1	Wdr51b	N/A	chr10:+:98592296:98659260	0	0	2	0
N/A	N/A	N/A	chr10:+:98618985:98620016	0	0	0	1
uc007gxh.1|uc007gxi.1	Wdr51b	N/A	chr10:+:98618985:98627503	1	2	0	0
uc007gxk.1	Dusp6	67603	chr10:+:98726725:98728626	0	1	0	0
N/A	N/A	N/A	chr10:+:99542764:99543539	0	0	1	2
uc007gxt.1|uc007gxu.1	Tmtc3	237500	chr10:-:99911684:99912873	0	1	0	0
uc007gxt.1|uc007gxu.1	Tmtc3	237500	chr10:-:99923742:99928655	0	1	0	0
N/A	N/A	N/A	chr10:-:99940656:99947685	0	0	2	3
N/A	N/A	N/A	chr10:-:99947759:99949796	0	0	0	1
N/A	N/A	N/A	chr10:+:99951042:99951196	0	0	1	0
N/A	N/A	N/A	chr10:+:99951273:99951954	0	0	1	0
N/A	N/A	N/A	chr10:+:99952023:99952781	0	1	0	0
N/A	N/A	N/A	chr10:+:99955425:99957535	0	0	0	1
N/A	N/A	N/A	chr10:+:99960663:99961696	0	1	0	0
N/A	N/A	N/A	chr10:+:99976638:99977092	1	3	0	0
N/A	N/A	N/A	chr10:+:99978937:99980411	0	0	1	0
uc007ahg.1|uc007ahh.1|uc007ahi.1|uc007ahj.1|uc007ahk.1|uc007ahl.1	Cspp1	211660	chr1:+:10028425:10035157	0	0	1	2
uc007ahg.1|uc007ahh.1|uc007ahi.1|uc007ahj.1|uc007ahk.1|uc007ahl.1	Cspp1	211660	chr1:+:10048904:10054414	1	1	0	0
uc007ahg.1|uc007ahh.1|uc007ahi.1|uc007ahj.1|uc007ahk.1|uc007ahl.1	Cspp1	211660	chr1:+:10049928:10054414	0	1	0	0
uc007ahg.1|uc007ahh.1|uc007ahi.1|uc007ahj.1|uc007ahk.1|uc007ahl.1	Cspp1	211660	chr1:+:10054494:10056507	0	0	0	1
uc007ahg.1|uc007ahh.1|uc007ahi.1|uc007ahj.1|uc007ahk.1|uc007ahl.1	Cspp1	211660	chr1:+:10086094:10094293	1	2	0	0
uc007ahg.1|uc007ahh.1|uc007ahi.1|uc007ahj.1|uc007ahk.1|uc007ahl.1	Cspp1	211660	chr1:+:10094445:10098450	0	2	0	0
uc007ahn.1|uc007aho.1|uc007ahp.1	Arfgef1	211673	chr1:-:10129077:10131640	0	1	0	0
uc007ahn.1|uc007aho.1|uc007ahp.1	Arfgef1	211673	chr1:-:10179039:10179308	0	1	0	0
uc007cfy.1|uc007cfz.1	C230078M14Rik	N/A	chr1:+:101972791:101994311	3	1	0	0
uc007cfy.1|uc007cfz.1	C230078M14Rik	N/A	chr1:+:102266461:102266635	2	2	0	0
uc007cfy.1|uc007cfz.1	C230078M14Rik	N/A	chr1:+:102266805:102275628	0	0	1	0
uc007cfy.1|uc007cfz.1	C230078M14Rik	N/A	chr1:+:102280197:102287044	1	1	0	0
uc007cfy.1|uc007cfz.1	C230078M14Rik	N/A	chr1:+:102280197:102328293	0	2	0	0
uc007cfy.1|uc007cfz.1	C230078M14Rik	N/A	chr1:+:102375153:102378482	0	0	2	1
uc007ahq.1|uc007ahr.1	Cpa6	329093	chr1:-:10327550:10398350	2	0	0	0
uc007ahq.1|uc007ahr.1	Cpa6	329093	chr1:-:10399448:10467106	0	0	0	1
uc007ahq.1|uc007ahr.1	Cpa6	329093	chr1:-:10467210:10471095	0	0	1	0
N/A	N/A	N/A	chr1:+:106666179:106668087	1	0	0	0
uc007cgc.1	Cdh20	23836	chr1:+:106838794:106843901	0	0	1	0
uc007cgd.1	Rnf152	320311	chr1:-:107251740:107252920	0	0	1	0
N/A	N/A	N/A	chr1:+:107253482:107258166	0	0	0	2
N/A	N/A	N/A	chr1:+:107254168:107258166	0	0	1	0
N/A	N/A	N/A	chr1:-:107445684:107447823	0	0	2	0
uc007cgf.1|uc007cgg.1|uc007cgh.1	Pign	27392	chr1:-:107445684:107448949	0	1	0	0
uc007cgf.1|uc007cgg.1|uc007cgh.1	Pign	27392	chr1:-:107450716:107451021	1	0	0	0
uc007cgf.1|uc007cgg.1|uc007cgh.1	Pign	27392	chr1:-:107495704:107534087	0	1	0	0
uc007cgf.1|uc007cgg.1|uc007cgh.1	Pign	27392	chr1:-:107534142:107534760	0	1	0	0
[truncated: 63,536 more rows]
