# Supplementary material for: RNA-Seq Profiling of Spinal Cord Motor Neurons from a Presymptomatic SOD1 ALS Mouse
Source: PLoS One. 2013 Jan 3;8(1):e53575. doi: 10.1371/journal.pone.0053575 (PMC3536741; doi:10.1371/journal.pone.0053575)
Supplement: Table S7 — Gene ontology enrichment for genes associated by novel TARs with increased levels in G85R motor neurons. Full GREAT output for gene ontology enrichments of genes assigned to novel TARS compared to a background set of all novel TARs identified in wild-type and G85R expression data. (XLSX) [file pone.0053575.s012.xlsx]

## Sheet: Table_S7_GREAT
# GREAT version 2.0.1	Species assembly: mm9	Association rule: Basal+extension: 5000 bp upstream, 1000 bp downstream, 1000000 bp max extension, curated regulatory domains included
# Ontology summary statistics are provided in the footer.
#
# Ontology	ID	Desc	Rank	HyperP	HyperBonfP	HyperFdrQ	RegionFoldEnrich	ExpFgRegions	FgRegionsHit	BgRegionsHit	FgSetTermCov	TermCov	NumFgGenesHit	NumBgGenesHit	TotalGenes	FgRegionNames	BgRegionNames	FgGeneNames	BgGeneNames
GO Molecular Function	GO:0031072	heat shock protein binding	1	5.23e-06	0.017	0.017	13	0.463	6	50	0.133	0.12	3	19	87	unnamed,unnamed,unnamed,unnamed,unnamed,unnamed	unnamed,unnamed,unnamed,unnamed,unnamed,unnamed,unnamed,unnamed,unnamed,unnamed,unnamed,unnamed,unnamed,unnamed,unnamed,unnamed,unnamed,unnamed,unnamed,unnamed,unnamed,unnamed,unnamed,unnamed,unnamed,unnamed,unnamed,unnamed,unnamed,unnamed,unnamed,unnamed,unnamed,unnamed,unnamed,unnamed,unnamed,unnamed,unnamed,unnamed,unnamed,unnamed,unnamed,unnamed,unnamed,unnamed,unnamed,unnamed,unnamed,unnamed	Dnajb1,Gak,Limk1	Ahr,Chordc1,Dnaja1,Dnajb1,Dnajb12,Dnajb14,Dnajb9,Dnajc15,Dnajc16,Dnajc18,Dnajc3,Dnajc30,Dnajc5,Gak,Limk1,Nfkbia,Sec63,Slc18a2,Stub1
GO Molecular Function	GO:0003743	translation initiation factor activity	2	0.000154	0.501	0.251	27	0.111	3	12	0.0667	0.25	1	7	63	unnamed,unnamed,unnamed	unnamed,unnamed,unnamed,unnamed,unnamed,unnamed,unnamed,unnamed,unnamed,unnamed,unnamed,unnamed	Eif4h	Dhx29,Eif2c3,Eif3c,Eif3d,Eif4a2,Eif4g3,Eif4h
GO Molecular Function	GO:0004842	ubiquitin-protein ligase activity	3	0.000246	0.8	0.267	5.44	1.29	7	139	0.156	0.0504	3	56	210	unnamed,unnamed,unnamed,unnamed,unnamed,unnamed,unnamed	unnamed,unnamed,unnamed,unnamed,unnamed,unnamed,unnamed,unnamed,unnamed,unnamed,unnamed,unnamed,unnamed,unnamed,unnamed,unnamed,unnamed,unnamed,unnamed,unnamed,unnamed,unnamed,unnamed,unnamed,unnamed,unnamed,unnamed,unnamed,unnamed,unnamed,unnamed,unnamed,unnamed,unnamed,unnamed,unnamed,unnamed,unnamed,unnamed,unnamed,unnamed,unnamed,unnamed,unnamed,unnamed,unnamed,unnamed,unnamed,unnamed,unnamed…	Brca1,Chfr,March5	Arih1,Brca1,Btrc,Cbl,Cblb,Cbll1,Chfr,Cul1,Cul3,Cyhr1,Fbxo30,Fbxo40,Fbxw11,Gm2058,Hace1,Hecw2,Kctd10,March5,Nedd4l,Pdzrn3,Rbbp6,Rbck1,Rchy1,Rnf130,Rnf144b,Rnf152,Rnf167,Rnf168,Rnf182,Rnf20,Siah1a,Skp1a,Stub1,Traf3,Traf4,Traf5,Trim23,Trim25,Trim32,Trim8,Ube2a,Ube2b,Ube2c,Ube2d3,Ube2e3,Ube2k,Ube2m,Ube2n,Ube2ql1,Ube2r2,Ube2w,Ube3a,Ubr4,Ubr7,Wwp1,Zswim2
GO Molecular Function	GO:0019787	small conjugating protein ligase activity	4	0.000269	0.874	0.219	5.36	1.31	7	141	0.156	0.0496	3	58	223	unnamed,unnamed,unnamed,unnamed,unnamed,unnamed,unnamed	unnamed,unnamed,unnamed,unnamed,unnamed,unnamed,unnamed,unnamed,unnamed,unnamed,unnamed,unnamed,unnamed,unnamed,unnamed,unnamed,unnamed,unnamed,unnamed,unnamed,unnamed,unnamed,unnamed,unnamed,unnamed,unnamed,unnamed,unnamed,unnamed,unnamed,unnamed,unnamed,unnamed,unnamed,unnamed,unnamed,unnamed,unnamed,unnamed,unnamed,unnamed,unnamed,unnamed,unnamed,unnamed,unnamed,unnamed,unnamed,unnamed,unnamed…	Brca1,Chfr,March5	Arih1,Brca1,Btrc,Cbl,Cblb,Cbll1,Chfr,Cul1,Cul3,Cyhr1,Fbxo30,Fbxo40,Fbxw11,Gm2058,Hace1,Hecw2,Kctd10,March5,Nedd4l,Pdzrn3,Pias2,Pias4,Rbbp6,Rbck1,Rchy1,Rnf130,Rnf144b,Rnf152,Rnf167,Rnf168,Rnf182,Rnf20,Siah1a,Skp1a,Stub1,Traf3,Traf4,Traf5,Trim23,Trim25,Trim32,Trim8,Ube2a,Ube2b,Ube2c,Ube2d3,Ube2e3,Ube2k,Ube2m,Ube2n,Ube2ql1,Ube2r2,Ube2w,Ube3a,Ubr4,Ubr7,Wwp1,Zswim2
GO Molecular Function	GO:0016881	acid-amino acid ligase activity	5	0.000426	1	0.277	4.97	1.41	7	152	0.156	0.0461	3	67	262	unnamed,unnamed,unnamed,unnamed,unnamed,unnamed,unnamed	unnamed,unnamed,unnamed,unnamed,unnamed,unnamed,unnamed,unnamed,unnamed,unnamed,unnamed,unnamed,unnamed,unnamed,unnamed,unnamed,unnamed,unnamed,unnamed,unnamed,unnamed,unnamed,unnamed,unnamed,unnamed,unnamed,unnamed,unnamed,unnamed,unnamed,unnamed,unnamed,unnamed,unnamed,unnamed,unnamed,unnamed,unnamed,unnamed,unnamed,unnamed,unnamed,unnamed,unnamed,unnamed,unnamed,unnamed,unnamed,unnamed,unnamed…	Brca1,Chfr,March5	Arih1,Brca1,Btrc,Cbl,Cblb,Cbll1,Chfr,Cul1,Cul3,Cyhr1,Fbxo30,Fbxo40,Fbxw11,Gclc,Gclm,Gm15800,Gm2058,Hace1,Hecw2,Kctd10,March5,Nedd4l,Pdzrn3,Pias2,Pias4,Rbbp6,Rbck1,Rchy1,Rnf130,Rnf144b,Rnf152,Rnf167,Rnf168,Rnf182,Rnf20,Siah1a,Skp1a,Stub1,Syvn1,Traf3,Traf4,Traf5,Trim23,Trim25,Trim32,Trim8,Ttl,Ttll11,Ttll12,Ttll7,Ube2a,Ube2b,Ube2c,Ube2d3,Ube2e3,Ube2k,Ube2m,Ube2n,Ube2ql1,Ube2r2,Ube2v2,Ube2w,Ube3a,Ubr…
GO Molecular Function	GO:0017075	syntaxin-1 binding	6	0.000824	1	0.447	43.2	0.0463	2	5	0.0444	0.4	1	3	10	unnamed,unnamed	unnamed,unnamed,unnamed,unnamed,unnamed	Cplx1	Cplx1,Cplx2,Snap25
GO Molecular Function	GO:0030332	cyclin binding	6	0.000824	1	0.447	43.2	0.0463	2	5	0.0444	0.4	1	3	12	unnamed,unnamed	unnamed,unnamed,unnamed,unnamed,unnamed	Gak	Cul3,Fbxo31,Gak
GO Molecular Function	GO:0016879	ligase activity, forming carbon-nitrogen bonds	8	0.000959	1	0.39	4.34	1.61	7	174	0.156	0.0402	3	75	292	unnamed,unnamed,unnamed,unnamed,unnamed,unnamed,unnamed	unnamed,unnamed,unnamed,unnamed,unnamed,unnamed,unnamed,unnamed,unnamed,unnamed,unnamed,unnamed,unnamed,unnamed,unnamed,unnamed,unnamed,unnamed,unnamed,unnamed,unnamed,unnamed,unnamed,unnamed,unnamed,unnamed,unnamed,unnamed,unnamed,unnamed,unnamed,unnamed,unnamed,unnamed,unnamed,unnamed,unnamed,unnamed,unnamed,unnamed,unnamed,unnamed,unnamed,unnamed,unnamed,unnamed,unnamed,unnamed,unnamed,unnamed…	Brca1,Chfr,March5	Arih1,Asns,Brca1,Btrc,Cbl,Cblb,Cbll1,Chfr,Cps1,Cul1,Cul3,Cyhr1,Fbxo30,Fbxo40,Fbxw11,Gclc,Gclm,Glul,Gm15800,Gm2058,Gmps,Hace1,Hecw2,Kctd10,Lias,March5,Mthfs,Mthfsd,Nedd4l,Pdzrn3,Pfas,Pias2,Pias4,Rbbp6,Rbck1,Rchy1,Rnf130,Rnf144b,Rnf152,Rnf167,Rnf168,Rnf182,Rnf20,Siah1a,Skp1a,Stub1,Syvn1,Traf3,Traf4,Traf5,Trim23,Trim25,Trim32,Trim8,Ttl,Ttll11,Ttll12,Ttll7,Ube2a,Ube2b,Ube2c,Ube2d3,Ube2e3,Ube2k,Ube2m,…
GO Molecular Function	GO:0016874	ligase activity	9	0.00128	1	0.461	3.65	2.19	8	237	0.178	0.0338	4	105	444	unnamed,unnamed,unnamed,unnamed,unnamed,unnamed,unnamed,unnamed	unnamed,unnamed,unnamed,unnamed,unnamed,unnamed,unnamed,unnamed,unnamed,unnamed,unnamed,unnamed,unnamed,unnamed,unnamed,unnamed,unnamed,unnamed,unnamed,unnamed,unnamed,unnamed,unnamed,unnamed,unnamed,unnamed,unnamed,unnamed,unnamed,unnamed,unnamed,unnamed,unnamed,unnamed,unnamed,unnamed,unnamed,unnamed,unnamed,unnamed,unnamed,unnamed,unnamed,unnamed,unnamed,unnamed,unnamed,unnamed,unnamed,unnamed…	Brca1,Chfr,March5,Neurl1b	1700113I22Rik,Aarsd1,Acsl6,Arih1,Asns,Brca1,Btrc,Cbl,Cblb,Cbll1,Chfr,Cps1,Cul1,Cul3,Cyhr1,Dalrd3,Fbxo30,Fbxo40,Fbxw11,Gars,Gatc,Gclc,Gclm,Glul,Gm15800,Gm2058,Gmps,Hace1,Hecw2,Iars2,Imp4,Kcmf1,Kctd10,Lias,Lrrc47,March5,March7,March9,Mthfs,Mthfsd,Nedd4l,Neurl1b,Pdzrn3,Pfas,Pias2,Pias4,Pja2,Rad18,Rars,Rbbp6,Rbck1,Rchy1,Rnf130,Rnf144b,Rnf152,Rnf167,Rnf168,Rnf182,Rnf19a,Rnf19b,Rnf20,Sars,Sh3rf1,Shprh,…
GO Molecular Function	GO:0019905	syntaxin binding	10	0.0029	1	0.942	24	0.0833	2	9	0.0444	0.222	1	5	29	unnamed,unnamed	unnamed,unnamed,unnamed,unnamed,unnamed,unnamed,unnamed,unnamed,unnamed	Cplx1	Cplx1,Cplx2,Gopc,Snap25,Syt3
GO Molecular Function	GO:0005326	neurotransmitter transporter activity	10	0.0029	1	0.942	24	0.0833	2	9	0.0444	0.222	1	4	24	unnamed,unnamed	unnamed,unnamed,unnamed,unnamed,unnamed,unnamed,unnamed,unnamed,unnamed	Cplx1	Cplx1,Slc18a3,Slc6a3,Slc6a8
GO Molecular Function	GO:0000149	SNARE binding	12	0.0036	1	0.976	21.6	0.0926	2	10	0.0444	0.2	1	6	35	unnamed,unnamed	unnamed,unnamed,unnamed,unnamed,unnamed,unnamed,unnamed,unnamed,unnamed,unnamed	Cplx1	Cplx1,Cplx2,Gopc,Snap25,Stx4a,Syt3
GO Molecular Function	GO:0004222	metalloendopeptidase activity	13	0.00377	1	0.943	6.17	0.648	4	70	0.0889	0.0571	1	25	120	unnamed,unnamed,unnamed,unnamed	unnamed,unnamed,unnamed,unnamed,unnamed,unnamed,unnamed,unnamed,unnamed,unnamed,unnamed,unnamed,unnamed,unnamed,unnamed,unnamed,unnamed,unnamed,unnamed,unnamed,unnamed,unnamed,unnamed,unnamed,unnamed,unnamed,unnamed,unnamed,unnamed,unnamed,unnamed,unnamed,unnamed,unnamed,unnamed,unnamed,unnamed,unnamed,unnamed,unnamed,unnamed,unnamed,unnamed,unnamed,unnamed,unnamed,unnamed,unnamed,unnamed,unnamed…	Ide	Adam17,Adam19,Adam23,Adam33,Adam8,Adamts19,Adamts3,Adamts4,Adamtsl2,Afg3l1,Afg3l2,Ide,Lmln,Mep1b,Mmel1,Mmp13,Mmp15,Mmp16,Mmp17,Mmp19,Nln,Nrd1,Osgep,Papln,Xrcc6bp1
GO Molecular Function	GO:0008135	translation factor activity, nucleic acid binding	14	0.00395	1	0.918	9.26	0.324	3	35	0.0667	0.0857	1	13	98	unnamed,unnamed,unnamed	unnamed,unnamed,unnamed,unnamed,unnamed,unnamed,unnamed,unnamed,unnamed,unnamed,unnamed,unnamed,unnamed,unnamed,unnamed,unnamed,unnamed,unnamed,unnamed,unnamed,unnamed,unnamed,unnamed,unnamed,unnamed,unnamed,unnamed,unnamed,unnamed,unnamed,unnamed,unnamed,unnamed,unnamed,unnamed	Eif4h	Dhx29,Eef1a2,Eef1b2,Eef2k,Eif2c3,Eif3c,Eif3d,Eif4a2,Eif4g3,Eif4h,Mtrf1l,Sox11,Tcea3
GO Molecular Function	GO:0051020	GTPase binding	15	0.00417	1	0.905	6	0.667	4	72	0.0889	0.0556	1	31	120	unnamed,unnamed,unnamed,unnamed	unnamed,unnamed,unnamed,unnamed,unnamed,unnamed,unnamed,unnamed,unnamed,unnamed,unnamed,unnamed,unnamed,unnamed,unnamed,unnamed,unnamed,unnamed,unnamed,unnamed,unnamed,unnamed,unnamed,unnamed,unnamed,unnamed,unnamed,unnamed,unnamed,unnamed,unnamed,unnamed,unnamed,unnamed,unnamed,unnamed,unnamed,unnamed,unnamed,unnamed,unnamed,unnamed,unnamed,unnamed,unnamed,unnamed,unnamed,unnamed,unnamed,unnamed…	2012-03-05	Arhgef2,Bicd1,Bnip3,Ccdc64,Cyfip1,Daam1,Dennd5a,Dgki,Dock4,Dock7,Fert2,Fmnl2,Gga3,Grasp,Ipo9,Kif16b,Kif3b,March5,Nup153,Pak3,Rab11fip3,Rab11fip4,Rap1a,Rapgef4,Rasa1,Rims1,Rims2,Sgsm3,Srgap1,Stx4a,Vcl
GO Molecular Function	GO:0030976	thiamine pyrophosphate binding	16	0.00926	1	1	108	0.00926	1	1	0.0222	1	1	1	6	unnamed	unnamed	Ogdhl	Ogdhl
GO Molecular Function	GO:0004591	oxoglutarate dehydrogenase (succinyl-transferring) activity	16	0.00926	1	1	108	0.00926	1	1	0.0222	1	1	1	3	unnamed	unnamed	Ogdhl	Ogdhl
GO Molecular Function	GO:0004791	thioredoxin-disulfide reductase activity	16	0.00926	1	1	108	0.00926	1	1	0.0222	1	1	1	5	unnamed	unnamed	Txnrd2	Txnrd2
GO Molecular Function	GO:0004428	inositol or phosphatidylinositol kinase activity	19	0.00926	1	1	13.5	0.148	2	16	0.0444	0.125	2	10	34	unnamed,unnamed	unnamed,unnamed,unnamed,unnamed,unnamed,unnamed,unnamed,unnamed,unnamed,unnamed,unnamed,unnamed,unnamed,unnamed,unnamed,unnamed	Pik3c2b,Ppip5k2	Atm,Ip6k2,Itpka,Pik3c2b,Pik3c3,Pik3ca,Pik3cd,Pik3r2,Pip4k2a,Ppip5k2
GO Molecular Function	GO:0008270	zinc ion binding	20	0.00928	1	1	1.92	7.29	14	787	0.311	0.0178	10	340	1812	unnamed,unnamed,unnamed,unnamed,unnamed,unnamed,unnamed,unnamed,unnamed,unnamed,unnamed,unnamed,unnamed,unnamed	unnamed,unnamed,unnamed,unnamed,unnamed,unnamed,unnamed,unnamed,unnamed,unnamed,unnamed,unnamed,unnamed,unnamed,unnamed,unnamed,unnamed,unnamed,unnamed,unnamed,unnamed,unnamed,unnamed,unnamed,unnamed,unnamed,unnamed,unnamed,unnamed,unnamed,unnamed,unnamed,unnamed,unnamed,unnamed,unnamed,unnamed,unnamed,unnamed,unnamed,unnamed,unnamed,unnamed,unnamed,unnamed,unnamed,unnamed,unnamed,unnamed,unnamed…	Brca1,Chfr,Ide,Limk1,March5,Mdm4,Neurl1b,S100b,Zc3h12c,Zfp605	2810021J22Rik,4930595M18Rik,4932442L08Rik,4933426I21Rik,AK011498,Ablim1,Adam17,Adam19,Adam23,Adam33,Adam8,Adamts19,Adamts3,Adamts4,Adamtsl2,Adap1,Adat2,Adnp2,Afg3l1,Afg3l2,Agap1,Agap2,Agap3,Agfg1,Agtpbp1,Alad,Ar,Arap1,Arap3,Arfgap3,Arid2,Arih1,Asap1,Asap2,Atf2,Atrx,Baz1a,Baz1b,Brca1,Brd1,Brf2,C130039O16Rik,Car12,Casz1,Cbl,Cblb,Cbll1,Cda,Cdadc1,Chfr,Chordc1,Clip1,Cpxm2,Crebbp,Csrp2,Cyhr1,Cyld,D3Er…
GO Molecular Function	GO:0008237	metallopeptidase activity	21	0.0146	1	1	4.19	0.954	4	103	0.0889	0.0388	1	37	189	unnamed,unnamed,unnamed,unnamed	unnamed,unnamed,unnamed,unnamed,unnamed,unnamed,unnamed,unnamed,unnamed,unnamed,unnamed,unnamed,unnamed,unnamed,unnamed,unnamed,unnamed,unnamed,unnamed,unnamed,unnamed,unnamed,unnamed,unnamed,unnamed,unnamed,unnamed,unnamed,unnamed,unnamed,unnamed,unnamed,unnamed,unnamed,unnamed,unnamed,unnamed,unnamed,unnamed,unnamed,unnamed,unnamed,unnamed,unnamed,unnamed,unnamed,unnamed,unnamed,unnamed,unnamed…	Ide	Adam17,Adam19,Adam23,Adam33,Adam8,Adamts19,Adamts3,Adamts4,Adamtsl2,Afg3l1,Afg3l2,Agtpbp1,Amz1,Cops5,Cpxm2,Dpp3,Erap1,Gm5136,Ide,Lmln,Lnpep,Mep1b,Metap2,Mmel1,Mmp13,Mmp15,Mmp16,Mmp17,Mmp19,Naalad2,Nln,Nrd1,Osgep,Papln,Pappa,Rnpep,Xrcc6bp1
GO Molecular Function	GO:0016667	oxidoreductase activity, acting on a sulfur group of donors	22	0.0157	1	1	10.3	0.194	2	21	0.0444	0.0952	2	11	49	unnamed,unnamed	unnamed,unnamed,unnamed,unnamed,unnamed,unnamed,unnamed,unnamed,unnamed,unnamed,unnamed,unnamed,unnamed,unnamed,unnamed,unnamed,unnamed,unnamed,unnamed,unnamed,unnamed	Pdia3,Txnrd2	Dld,Enox2,Ero1l,Glrx3,Pcyox1,Pcyox1l,Pdia3,Ptges2,Srxn1,Txnl1,Txnrd2
GO Molecular Function	GO:0000166	nucleotide binding	23	0.0161	1	1	1.62	11.1	18	1198	0.4	0.015	12	513	2415	unnamed,unnamed,unnamed,unnamed,unnamed,unnamed,unnamed,unnamed,unnamed,unnamed,unnamed,unnamed,unnamed,unnamed,unnamed,unnamed,unnamed,unnamed	unnamed,unnamed,unnamed,unnamed,unnamed,unnamed,unnamed,unnamed,unnamed,unnamed,unnamed,unnamed,unnamed,unnamed,unnamed,unnamed,unnamed,unnamed,unnamed,unnamed,unnamed,unnamed,unnamed,unnamed,unnamed,unnamed,unnamed,unnamed,unnamed,unnamed,unnamed,unnamed,unnamed,unnamed,unnamed,unnamed,unnamed,unnamed,unnamed,unnamed,unnamed,unnamed,unnamed,unnamed,unnamed,unnamed,unnamed,unnamed,unnamed,unnamed…	Chfr,Dach1,Eif4h,Gak,Gapdh,Hipk4,Hspa1b,Ide,Limk1,Ppip5k2,Rnd2,Txnrd2	2610101N10Rik,4921513D23Rik,4930595M18Rik,4933405O20Rik,A1cf,Aarsd1,Abca8b,Abcb5,Abcb7,Abcc4,Abcg1,Abcg4,Acsl6,Actr1b,Actr2,Actr3b,Acvr1b,Adck3,Adcy5,Adcy9,Adrbk1,Afg3l1,Afg3l2,Agap1,Agap2,Agap3,Agk,Ak8,Akt2,Akt3,Aldh5a1,Aldh9a1,Alkbh8,Alpk2,Ankk1,Arf1,Arf3,Arf4,Arf6,Arhgap5,Arl1,Arl10,Arl15,Arl3,Arl5b,Arl5c,Arl8a,Asns,Aspdh,Atad1,Atg7,Atl3,Atm,Atp10a,Atp13a3,Atp1a3,Atp2a2,Atp2b3,Atp2b4,Atp2c2,At…
GO Molecular Function	GO:0004915	interleukin-6 receptor activity	24	0.0184	1	1	54	0.0185	1	2	0.0222	0.5	1	1	2	unnamed	unnamed,unnamed	Il6st	Il6st
GO Molecular Function	GO:0048156	tau protein binding	24	0.0184	1	1	54	0.0185	1	2	0.0222	0.5	1	1	7	unnamed	unnamed,unnamed	S100b	S100b
GO Molecular Function	GO:0050786	RAGE receptor binding	24	0.0184	1	1	54	0.0185	1	2	0.0222	0.5	1	1	4	unnamed	unnamed,unnamed	S100b	S100b
GO Molecular Function	GO:0043120	tumor necrosis factor binding	24	0.0184	1	1	54	0.0185	1	2	0.0222	0.5	1	1	6	unnamed	unnamed,unnamed	Tnfrsf11a	Tnfrsf11a
GO Molecular Function	GO:0048154	S100 beta binding	24	0.0184	1	1	54	0.0185	1	2	0.0222	0.5	1	1	3	unnamed	unnamed,unnamed	S100b	S100b
GO Molecular Function	GO:0005035	death receptor activity	24	0.0184	1	1	54	0.0185	1	2	0.0222	0.5	1	1	6	unnamed	unnamed,unnamed	Tnfrsf11a	Tnfrsf11a
GO Molecular Function	GO:0004921	interleukin-11 receptor activity	24	0.0184	1	1	54	0.0185	1	2	0.0222	0.5	1	1	4	unnamed	unnamed,unnamed	Il6st	Il6st
GO Molecular Function	GO:0005031	tumor necrosis factor receptor activity	24	0.0184	1	1	54	0.0185	1	2	0.0222	0.5	1	1	5	unnamed	unnamed,unnamed	Tnfrsf11a	Tnfrsf11a
GO Molecular Function	GO:0019955	cytokine binding	32	0.0187	1	1	9.39	0.213	2	23	0.0444	0.087	2	10	97	unnamed,unnamed	unnamed,unnamed,unnamed,unnamed,unnamed,unnamed,unnamed,unnamed,unnamed,unnamed,unnamed,unnamed,unnamed,unnamed,unnamed,unnamed,unnamed,unnamed,unnamed,unnamed,unnamed,unnamed,unnamed	Il6st,Tnfrsf11a	Cd44,Gm614,Ifnar1,Il12rb2,Il18bp,Il5ra,Il6st,Itgav,Lifr,Tnfrsf11a
GO Molecular Function	GO:0016903	oxidoreductase activity, acting on the aldehyde or oxo group of donors	33	0.022	1	1	8.64	0.231	2	25	0.0444	0.08	2	9	44	unnamed,unnamed	unnamed,unnamed,unnamed,unnamed,unnamed,unnamed,unnamed,unnamed,unnamed,unnamed,unnamed,unnamed,unnamed,unnamed,unnamed,unnamed,unnamed,unnamed,unnamed,unnamed,unnamed,unnamed,unnamed,unnamed,unnamed	Gapdh,Ogdhl	Aldh4a1,Aldh5a1,Aldh7a1,Aldh9a1,Far1,Gapdh,Gapdh,Ogdhl,Pdhb
GO Molecular Function	GO:0046914	transition metal ion binding	34	0.0254	1	1	1.7	8.21	14	887	0.311	0.0158	10	386	2142	unnamed,unnamed,unnamed,unnamed,unnamed,unnamed,unnamed,unnamed,unnamed,unnamed,unnamed,unnamed,unnamed,unnamed	unnamed,unnamed,unnamed,unnamed,unnamed,unnamed,unnamed,unnamed,unnamed,unnamed,unnamed,unnamed,unnamed,unnamed,unnamed,unnamed,unnamed,unnamed,unnamed,unnamed,unnamed,unnamed,unnamed,unnamed,unnamed,unnamed,unnamed,unnamed,unnamed,unnamed,unnamed,unnamed,unnamed,unnamed,unnamed,unnamed,unnamed,unnamed,unnamed,unnamed,unnamed,unnamed,unnamed,unnamed,unnamed,unnamed,unnamed,unnamed,unnamed,unnamed…	Brca1,Chfr,Ide,Limk1,March5,Mdm4,Neurl1b,S100b,Zc3h12c,Zfp605	2810021J22Rik,4930595M18Rik,4932442L08Rik,4933426I21Rik,AK011498,Ablim1,Adam17,Adam19,Adam23,Adam33,Adam8,Adamts19,Adamts3,Adamts4,Adamtsl2,Adap1,Adat2,Adnp2,Afg3l1,Afg3l2,Agap1,Agap2,Agap3,Agfg1,Agtpbp1,Alad,Alkbh2,Alkbh3,Ar,Arap1,Arap3,Arfgap3,Arid2,Arih1,Asap1,Asap2,Atf2,Atrx,Baz1a,Baz1b,Brca1,Brd1,Brf2,C130039O16Rik,Car12,Casz1,Cbl,Cblb,Cbll1,Cda,Cdadc1,Cdipt,Chfr,Chordc1,Clip1,Cp,Cpxm2,Crebb…
GO Molecular Function	GO:0004175	endopeptidase activity	35	0.0269	1	1	3.48	1.15	4	124	0.0889	0.0323	1	54	425	unnamed,unnamed,unnamed,unnamed	unnamed,unnamed,unnamed,unnamed,unnamed,unnamed,unnamed,unnamed,unnamed,unnamed,unnamed,unnamed,unnamed,unnamed,unnamed,unnamed,unnamed,unnamed,unnamed,unnamed,unnamed,unnamed,unnamed,unnamed,unnamed,unnamed,unnamed,unnamed,unnamed,unnamed,unnamed,unnamed,unnamed,unnamed,unnamed,unnamed,unnamed,unnamed,unnamed,unnamed,unnamed,unnamed,unnamed,unnamed,unnamed,unnamed,unnamed,unnamed,unnamed,unnamed…	Ide	Acr,Adam17,Adam19,Adam23,Adam33,Adam8,Adamts19,Adamts3,Adamts4,Adamtsl2,Afg3l1,Afg3l2,Aph1c,Atg4b,Capn1,Capn6,Cd46,Cntnap5a,Cps1,Ctsc,Ddi1,Hgf,Htra1,Ide,Lmln,Mep1b,Mmel1,Mmp13,Mmp15,Mmp16,Mmp17,Mmp19,Nln,Nrd1,Nrip2,Osgep,Papln,Pappa,Prep,Proz,Prss38,Prss53,Psen1,Psma3,Psma6,Psmb2,Psmb4,Psmb6,Rhbdl1,Rhbdl3,Sppl3,Tmprss15,Usp34,Xrcc6bp1
GO Molecular Function	GO:0016862	intramolecular oxidoreductase activity, interconverting keto- and enol-groups	36	0.0275	1	1	36	0.0278	1	3	0.0222	0.333	1	2	10	unnamed	unnamed,unnamed,unnamed	Pdia3	Erp44,Pdia3
GO Molecular Function	GO:0000827	inositol 1,3,4,5,6-pentakisphosphate kinase activity	36	0.0275	1	1	36	0.0278	1	3	0.0222	0.333	1	1	2	unnamed	unnamed,unnamed,unnamed	Ppip5k2	Ppip5k2
GO Molecular Function	GO:0016668	oxidoreductase activity, acting on a sulfur group of donors, NAD or NADP as acceptor	36	0.0275	1	1	36	0.0278	1	3	0.0222	0.333	1	2	8	unnamed	unnamed,unnamed,unnamed	Txnrd2	Dld,Txnrd2
GO Molecular Function	GO:0033857	diphosphoinositol-pentakisphosphate kinase activity	36	0.0275	1	1	36	0.0278	1	3	0.0222	0.333	1	1	2	unnamed	unnamed,unnamed,unnamed	Ppip5k2	Ppip5k2
GO Molecular Function	GO:0004308	exo-alpha-sialidase activity	36	0.0275	1	1	36	0.0278	1	3	0.0222	0.333	1	2	4	unnamed	unnamed,unnamed,unnamed	Neu1	Neu1,Neu3
GO Molecular Function	GO:0003756	protein disulfide isomerase activity	36	0.0275	1	1	36	0.0278	1	3	0.0222	0.333	1	2	8	unnamed	unnamed,unnamed,unnamed	Pdia3	Erp44,Pdia3
GO Molecular Function	GO:0016651	oxidoreductase activity, acting on NADH or NADPH	42	0.0329	1	1	6.97	0.287	2	31	0.0444	0.0645	2	15	54	unnamed,unnamed	unnamed,unnamed,unnamed,unnamed,unnamed,unnamed,unnamed,unnamed,unnamed,unnamed,unnamed,unnamed,unnamed,unnamed,unnamed,unnamed,unnamed,unnamed,unnamed,unnamed,unnamed,unnamed,unnamed,unnamed,unnamed,unnamed,unnamed,unnamed,unnamed,unnamed,unnamed	Txnrd2,mt-Nd4	Cbr4,Dld,Gmpr,Gmpr2,Ndufa12,Ndufa13,Ndufa9,Ndufaf2,Ndufb3,Ndufs1,Ndufs4,Ndufs7,Pax2,Txnrd2,mt-Nd4
GO Molecular Function	GO:0042578	phosphoric ester hydrolase activity	43	0.0341	1	1	2.74	1.82	5	197	0.111	0.0254	5	80	327	unnamed,unnamed,unnamed,unnamed,unnamed	unnamed,unnamed,unnamed,unnamed,unnamed,unnamed,unnamed,unnamed,unnamed,unnamed,unnamed,unnamed,unnamed,unnamed,unnamed,unnamed,unnamed,unnamed,unnamed,unnamed,unnamed,unnamed,unnamed,unnamed,unnamed,unnamed,unnamed,unnamed,unnamed,unnamed,unnamed,unnamed,unnamed,unnamed,unnamed,unnamed,unnamed,unnamed,unnamed,unnamed,unnamed,unnamed,unnamed,unnamed,unnamed,unnamed,unnamed,unnamed,unnamed,unnamed…	Ctdspl2,Dusp1,Pld3,Ppip5k2,Ppm1h	Acp6,Ctdspl2,Dusp1,Dusp14,Dusp15,Dusp19,Dusp3,Dusp4,Dusp8,Dusp9,Enpp6,Epm2a,G6pc,Hddc3,Hdhd3,Htr2a,Impad1,Inpp1,Inpp4a,Lpin1,Lpin2,Mtm1,Mtmr12,Mtmr2,Mtmr9,Nt5c1a,Nt5c2,Pde4a,Pde6a,Pde7b,Pde9a,Pfkfb1,Pgam2,Phlpp2,Plcb1,Plcb2,Plcb4,Plcd3,Plce1,Plcg2,Plch2,Plcl1,Plcxd3,Pld2,Pld3,Pld6,Pon1,Pon3,Ppap2a,Ppapdc1a,Ppip5k2,Ppm1a,Ppm1h,Ppm1l,Ppp1cb,Ppp1r12a,Ppp1r15b,Ppp2ca,Ppp2r2d,Ppp3ca,Ptpn18,Ptpn3,Ptpn4…
GO Molecular Function	GO:0016624	oxidoreductase activity, acting on the aldehyde or oxo group of donors, disulfide as acceptor	44	0.0365	1	1	27	0.037	1	4	0.0222	0.25	1	2	9	unnamed	unnamed,unnamed,unnamed,unnamed	Ogdhl	Ogdhl,Pdhb
GO Molecular Function	GO:0008503	benzodiazepine receptor activity	44	0.0365	1	1	27	0.037	1	4	0.0222	0.25	1	2	3	unnamed	unnamed,unnamed,unnamed,unnamed	Gabra2	Gabra2,Tspo
GO Molecular Function	GO:0043274	phospholipase binding	44	0.0365	1	1	27	0.037	1	4	0.0222	0.25	1	3	15	unnamed	unnamed,unnamed,unnamed,unnamed	Nefl	Calm2,Calm3,Nefl
GO Molecular Function	GO:0017022	myosin binding	44	0.0365	1	1	27	0.037	1	4	0.0222	0.25	1	4	21	unnamed	unnamed,unnamed,unnamed,unnamed	Gipc1	Gipc1,Rhoa,Snap25,Trim32
GO Molecular Function	GO:0003993	acid phosphatase activity	44	0.0365	1	1	27	0.037	1	4	0.0222	0.25	1	2	11	unnamed	unnamed,unnamed,unnamed,unnamed	Ppip5k2	Acp6,Ppip5k2
GO Molecular Function	GO:0005200	structural constituent of cytoskeleton	44	0.0365	1	1	27	0.037	1	4	0.0222	0.25	1	5	30	unnamed	unnamed,unnamed,unnamed,unnamed	Gfap	Gfap,Myom2,Tln2,Tpm1,Tubb5
GO Molecular Function	GO:0008330	protein tyrosine/threonine phosphatase activity	44	0.0365	1	1	27	0.037	1	4	0.0222	0.25	1	3	3	unnamed	unnamed,unnamed,unnamed,unnamed	Dusp1	Dusp1,Dusp19,Dusp4
GO Molecular Function	GO:0050661	NADP binding	51	0.039	1	1	6.35	0.315	2	34	0.0444	0.0588	2	10	41	unnamed,unnamed	unnamed,unnamed,unnamed,unnamed,unnamed,unnamed,unnamed,unnamed,unnamed,unnamed,unnamed,unnamed,unnamed,unnamed,unnamed,unnamed,unnamed,unnamed,unnamed,unnamed,unnamed,unnamed,unnamed,unnamed,unnamed,unnamed,unnamed,unnamed,unnamed,unnamed,unnamed,unnamed,unnamed,unnamed	Gapdh,Txnrd2	Aspdh,Cbr4,Decr1,Fdxr,Gapdh,Gapdh,H6pd,Hmgcr,Nos1,Txnrd2
GO Molecular Function	GO:0005524	ATP binding	52	0.0419	1	1	1.69	7.1	12	767	0.267	0.0156	6	324	1507	unnamed,unnamed,unnamed,unnamed,unnamed,unnamed,unnamed,unnamed,unnamed,unnamed,unnamed,unnamed	unnamed,unnamed,unnamed,unnamed,unnamed,unnamed,unnamed,unnamed,unnamed,unnamed,unnamed,unnamed,unnamed,unnamed,unnamed,unnamed,unnamed,unnamed,unnamed,unnamed,unnamed,unnamed,unnamed,unnamed,unnamed,unnamed,unnamed,unnamed,unnamed,unnamed,unnamed,unnamed,unnamed,unnamed,unnamed,unnamed,unnamed,unnamed,unnamed,unnamed,unnamed,unnamed,unnamed,unnamed,unnamed,unnamed,unnamed,unnamed,unnamed,unnamed…	Gak,Hipk4,Hspa1b,Ide,Limk1,Ppip5k2	4933405O20Rik,Aarsd1,Abca8b,Abcb5,Abcb7,Abcc4,Abcg1,Abcg4,Acsl6,Actr1b,Actr2,Actr3b,Acvr1b,Adck3,Adcy5,Adcy9,Adrbk1,Afg3l1,Afg3l2,Agk,Ak8,Akt2,Akt3,Alpk2,Ankk1,Asns,Atad1,Atm,Atp10a,Atp13a3,Atp1a3,Atp2a2,Atp2b3,Atp2b4,Atp2c2,Atp8a2,Atp9b,Atrx,B230120H23Rik,Baz1b,Bbs10,Bcr,Bmpr1a,Bmpr1b,Bmpr2,Braf,Brsk1,Btaf1,Cacna1b,Camk2d,Camk4,Camkk2,Cct2,Cct4,Cct7,Cdc42bpa,Cdc6,Cdk14,Cdk7,Cdk8,Cdkl1,Chd1,Chd2,…
GO Molecular Function	GO:0003824	catalytic activity	53	0.0453	1	1	1.29	20.9	27	2253	0.6	0.012	24	1104	5388	unnamed,unnamed,unnamed,unnamed,unnamed,unnamed,unnamed,unnamed,unnamed,unnamed,unnamed,unnamed,unnamed,unnamed,unnamed,unnamed,unnamed,unnamed,unnamed,unnamed,unnamed,unnamed,unnamed,unnamed,unnamed,unnamed,unnamed	unnamed,unnamed,unnamed,unnamed,unnamed,unnamed,unnamed,unnamed,unnamed,unnamed,unnamed,unnamed,unnamed,unnamed,unnamed,unnamed,unnamed,unnamed,unnamed,unnamed,unnamed,unnamed,unnamed,unnamed,unnamed,unnamed,unnamed,unnamed,unnamed,unnamed,unnamed,unnamed,unnamed,unnamed,unnamed,unnamed,unnamed,unnamed,unnamed,unnamed,unnamed,unnamed,unnamed,unnamed,unnamed,unnamed,unnamed,unnamed,unnamed,unnamed…	1110032A04Rik,Brca1,Chfr,Ctdspl2,Dip2a,Dis3l,Dusp1,Gak,Gapdh,Hipk4,Ide,Limk1,March5,Neu1,Neurl1b,Ogdhl,Pdia3,Pik3c2b,Pld3,Ppip5k2,Ppm1h,Txnrd2,Zc3h12c,mt-Nd4	1110002B05Rik,1110032A04Rik,1700113I22Rik,2810055F11Rik,2810405K02Rik,4921515J06Rik,4930444G20Rik,4931440L10Rik,4933405O20Rik,5330437I02Rik,A130022J15Rik,A1cf,AF366264,AI480653,Aarsd1,Aasdhppt,Abca8b,Abcb5,Abcb7,Abcc4,Abcg1,Abcg4,Abhd2,Abhd5,Abhd6,Acad9,Acat1,Accsl,Acot13,Acp6,Acr,Acsl6,Acvr1b,Acyp2,Adad2,Adam17,Adam19,Adam23,Adam33,Adam8,Adamts19,Adamts3,Adamts4,Adamtsl2,Adar,Adat1,Adat2,Adck3,A…
GO Molecular Function	GO:0004924	oncostatin-M receptor activity	54	0.0455	1	1	21.6	0.0463	1	5	0.0222	0.2	1	2	3	unnamed	unnamed,unnamed,unnamed,unnamed,unnamed	Il6st	Il6st,Lifr
GO Molecular Function	GO:0052723	inositol hexakisphosphate 1-kinase activity	54	0.0455	1	1	21.6	0.0463	1	5	0.0222	0.2	1	2	5	unnamed	unnamed,unnamed,unnamed,unnamed,unnamed	Ppip5k2	Ip6k2,Ppip5k2
GO Molecular Function	GO:0052724	inositol hexakisphosphate 3-kinase activity	54	0.0455	1	1	21.6	0.0463	1	5	0.0222	0.2	1	2	5	unnamed	unnamed,unnamed,unnamed,unnamed,unnamed	Ppip5k2	Ip6k2,Ppip5k2
GO Molecular Function	GO:0070290	NAPE-specific phospholipase D activity	54	0.0455	1	1	21.6	0.0463	1	5	0.0222	0.2	1	2	4	unnamed	unnamed,unnamed,unnamed,unnamed,unnamed	Pld3	Pld2,Pld3
GO Molecular Function	GO:0005127	ciliary neurotrophic factor receptor binding	54	0.0455	1	1	21.6	0.0463	1	5	0.0222	0.2	1	2	7	unnamed	unnamed,unnamed,unnamed,unnamed,unnamed	Il6st	Il6st,Lifr
GO Molecular Function	GO:0000832	inositol hexakisphosphate 5-kinase activity	54	0.0455	1	1	21.6	0.0463	1	5	0.0222	0.2	1	2	5	unnamed	unnamed,unnamed,unnamed,unnamed,unnamed	Ppip5k2	Ip6k2,Ppip5k2
GO Molecular Function	GO:0004923	leukemia inhibitory factor receptor activity	54	0.0455	1	1	21.6	0.0463	1	5	0.0222	0.2	1	2	2	unnamed	unnamed,unnamed,unnamed,unnamed,unnamed	Il6st	Il6st,Lifr
GO Molecular Function	GO:0004630	phospholipase D activity	54	0.0455	1	1	21.6	0.0463	1	5	0.0222	0.2	1	2	6	unnamed	unnamed,unnamed,unnamed,unnamed,unnamed	Pld3	Pld2,Pld3
GO Molecular Function	GO:0004897	ciliary neurotrophic factor receptor activity	54	0.0455	1	1	21.6	0.0463	1	5	0.0222	0.2	1	2	4	unnamed	unnamed,unnamed,unnamed,unnamed,unnamed	Il6st	Il6st,Lifr
GO Molecular Function	GO:0032559	adenyl ribonucleotide binding	63	0.0485	1	1	1.65	7.26	12	784	0.267	0.0153	6	329	1529	unnamed,unnamed,unnamed,unnamed,unnamed,unnamed,unnamed,unnamed,unnamed,unnamed,unnamed,unnamed	unnamed,unnamed,unnamed,unnamed,unnamed,unnamed,unnamed,unnamed,unnamed,unnamed,unnamed,unnamed,unnamed,unnamed,unnamed,unnamed,unnamed,unnamed,unnamed,unnamed,unnamed,unnamed,unnamed,unnamed,unnamed,unnamed,unnamed,unnamed,unnamed,unnamed,unnamed,unnamed,unnamed,unnamed,unnamed,unnamed,unnamed,unnamed,unnamed,unnamed,unnamed,unnamed,unnamed,unnamed,unnamed,unnamed,unnamed,unnamed,unnamed,unnamed…	Gak,Hipk4,Hspa1b,Ide,Limk1,Ppip5k2	4933405O20Rik,Aarsd1,Abca8b,Abcb5,Abcb7,Abcc4,Abcg1,Abcg4,Acsl6,Actr1b,Actr2,Actr3b,Acvr1b,Adck3,Adcy5,Adcy9,Adrbk1,Afg3l1,Afg3l2,Agk,Ak8,Akt2,Akt3,Alpk2,Ankk1,Asns,Atad1,Atm,Atp10a,Atp13a3,Atp1a3,Atp2a2,Atp2b3,Atp2b4,Atp2c2,Atp8a2,Atp9b,Atrx,B230120H23Rik,Baz1b,Bbs10,Bcr,Bmpr1a,Bmpr1b,Bmpr2,Braf,Brsk1,Btaf1,Cacna1b,Camk2d,Camk4,Camkk2,Cct2,Cct4,Cct7,Cdc42bpa,Cdc6,Cdk14,Cdk7,Cdk8,Cdkl1,Chd1,Chd2,…
GO Molecular Function	GO:0016791	phosphatase activity	64	0.0488	1	1	2.88	1.39	4	150	0.0889	0.0267	4	60	244	unnamed,unnamed,unnamed,unnamed	unnamed,unnamed,unnamed,unnamed,unnamed,unnamed,unnamed,unnamed,unnamed,unnamed,unnamed,unnamed,unnamed,unnamed,unnamed,unnamed,unnamed,unnamed,unnamed,unnamed,unnamed,unnamed,unnamed,unnamed,unnamed,unnamed,unnamed,unnamed,unnamed,unnamed,unnamed,unnamed,unnamed,unnamed,unnamed,unnamed,unnamed,unnamed,unnamed,unnamed,unnamed,unnamed,unnamed,unnamed,unnamed,unnamed,unnamed,unnamed,unnamed,unnamed…	Ctdspl2,Dusp1,Ppip5k2,Ppm1h	Acp6,Ctdspl2,Dusp1,Dusp14,Dusp15,Dusp19,Dusp3,Dusp4,Dusp8,Dusp9,Epm2a,G6pc,Hdhd3,Impad1,Inpp1,Inpp4a,Lpin1,Lpin2,Mtm1,Mtmr12,Mtmr2,Mtmr9,Nt5c1a,Nt5c2,Pfkfb1,Pgam2,Phlpp2,Pon1,Pon3,Ppap2a,Ppapdc1a,Ppip5k2,Ppm1a,Ppm1h,Ppm1l,Ppp1cb,Ppp1r12a,Ppp1r15b,Ppp2ca,Ppp2r2d,Ppp3ca,Ptpn18,Ptpn3,Ptpn4,Ptpn9,Ptpra,Ptprb,Ptprd,Ptprg,Ptprm,Ptprn2,Sbf1,Sgpp2,Ssh1,Ssh2,Styx,Synj2,Tpte,Ubash3b,Vps29
GO Molecular Function	GO:0016788	hydrolase activity, acting on ester bonds	65	0.0515	1	1	2.04	3.43	7	370	0.156	0.0189	7	149	694	unnamed,unnamed,unnamed,unnamed,unnamed,unnamed,unnamed	unnamed,unnamed,unnamed,unnamed,unnamed,unnamed,unnamed,unnamed,unnamed,unnamed,unnamed,unnamed,unnamed,unnamed,unnamed,unnamed,unnamed,unnamed,unnamed,unnamed,unnamed,unnamed,unnamed,unnamed,unnamed,unnamed,unnamed,unnamed,unnamed,unnamed,unnamed,unnamed,unnamed,unnamed,unnamed,unnamed,unnamed,unnamed,unnamed,unnamed,unnamed,unnamed,unnamed,unnamed,unnamed,unnamed,unnamed,unnamed,unnamed,unnamed…	Ctdspl2,Dis3l,Dusp1,Pld3,Ppip5k2,Ppm1h,Zc3h12c	Aarsd1,Abhd2,Abhd6,Acot13,Acp6,Aoah,Arsa,C77370,Chka,Cnot6l,Ctdspl2,Cyld,Daglb,Dem1,Dis3l,Drosha,Dusp1,Dusp14,Dusp15,Dusp19,Dusp3,Dusp4,Dusp8,Dusp9,Eif2c2,Elac1,Endod1,Enpp6,Epm2a,Eri3,Ern1,Esd,Exd1,Exd2,G3bp1,G6pc,Glrb,Gm5136,H6pd,Hddc3,Hdhd3,Htr2a,Impad1,Inpp1,Inpp4a,Isg20,Lpin1,Lpin2,Lpl,Mtm1,Mtmr12,Mtmr2,Mtmr9,Mus81,Nceh1,Nit1,Nt5c1a,Nt5c2,Oc90,Parn,Pde4a,Pde6a,Pde7b,Pde9a,Pfkfb1,Pgam2,Pgls,P…
GO Molecular Function	GO:0030554	adenyl nucleotide binding	66	0.0523	1	1	1.63	7.34	12	793	0.267	0.0151	6	332	1536	unnamed,unnamed,unnamed,unnamed,unnamed,unnamed,unnamed,unnamed,unnamed,unnamed,unnamed,unnamed	unnamed,unnamed,unnamed,unnamed,unnamed,unnamed,unnamed,unnamed,unnamed,unnamed,unnamed,unnamed,unnamed,unnamed,unnamed,unnamed,unnamed,unnamed,unnamed,unnamed,unnamed,unnamed,unnamed,unnamed,unnamed,unnamed,unnamed,unnamed,unnamed,unnamed,unnamed,unnamed,unnamed,unnamed,unnamed,unnamed,unnamed,unnamed,unnamed,unnamed,unnamed,unnamed,unnamed,unnamed,unnamed,unnamed,unnamed,unnamed,unnamed,unnamed…	Gak,Hipk4,Hspa1b,Ide,Limk1,Ppip5k2	4933405O20Rik,Aarsd1,Abca8b,Abcb5,Abcb7,Abcc4,Abcg1,Abcg4,Acsl6,Actr1b,Actr2,Actr3b,Acvr1b,Adck3,Adcy5,Adcy9,Adrbk1,Afg3l1,Afg3l2,Agk,Ak8,Akt2,Akt3,Alpk2,Ankk1,Asns,Atad1,Atm,Atp10a,Atp13a3,Atp1a3,Atp2a2,Atp2b3,Atp2b4,Atp2c2,Atp8a2,Atp9b,Atrx,B230120H23Rik,Baz1b,Bbs10,Bcr,Bmpr1a,Bmpr1b,Bmpr2,Braf,Brsk1,Btaf1,Cacna1b,Camk2d,Camk4,Camkk2,Cct2,Cct4,Cct7,Cdc42bpa,Cdc6,Cdk14,Cdk7,Cdk8,Cdkl1,Chd1,Chd2,…
GO Molecular Function	GO:0005138	interleukin-6 receptor binding	67	0.0543	1	1	18	0.0556	1	6	0.0222	0.167	1	3	7	unnamed	unnamed,unnamed,unnamed,unnamed,unnamed,unnamed	Il6st	Adam17,Erap1,Il6st
GO Molecular Function	GO:0004721	phosphoprotein phosphatase activity	68	0.0569	1	1	3.41	0.88	3	95	0.0667	0.0316	3	36	155	unnamed,unnamed,unnamed	unnamed,unnamed,unnamed,unnamed,unnamed,unnamed,unnamed,unnamed,unnamed,unnamed,unnamed,unnamed,unnamed,unnamed,unnamed,unnamed,unnamed,unnamed,unnamed,unnamed,unnamed,unnamed,unnamed,unnamed,unnamed,unnamed,unnamed,unnamed,unnamed,unnamed,unnamed,unnamed,unnamed,unnamed,unnamed,unnamed,unnamed,unnamed,unnamed,unnamed,unnamed,unnamed,unnamed,unnamed,unnamed,unnamed,unnamed,unnamed,unnamed,unnamed…	Ctdspl2,Dusp1,Ppm1h	Ctdspl2,Dusp1,Dusp14,Dusp15,Dusp19,Dusp3,Dusp4,Dusp8,Dusp9,Epm2a,Mtm1,Mtmr2,Phlpp2,Ppm1a,Ppm1h,Ppm1l,Ppp1cb,Ppp1r12a,Ppp1r15b,Ppp2ca,Ppp3ca,Ptpn18,Ptpn3,Ptpn4,Ptpn9,Ptpra,Ptprb,Ptprd,Ptprg,Ptprm,Ptprn2,Ssh1,Ssh2,Styx,Tpte,Ubash3b
GO Molecular Function	GO:0050662	coenzyme binding	69	0.0599	1	1	3.34	0.898	3	97	0.0667	0.0309	3	38	192	unnamed,unnamed,unnamed	unnamed,unnamed,unnamed,unnamed,unnamed,unnamed,unnamed,unnamed,unnamed,unnamed,unnamed,unnamed,unnamed,unnamed,unnamed,unnamed,unnamed,unnamed,unnamed,unnamed,unnamed,unnamed,unnamed,unnamed,unnamed,unnamed,unnamed,unnamed,unnamed,unnamed,unnamed,unnamed,unnamed,unnamed,unnamed,unnamed,unnamed,unnamed,unnamed,unnamed,unnamed,unnamed,unnamed,unnamed,unnamed,unnamed,unnamed,unnamed,unnamed,unnamed…	Gapdh,Ogdhl,Txnrd2	4933405O20Rik,Acad9,Acat1,Acbd3,Acbd5,Acbd6,Agps,Aifm3,Aldh5a1,Aldh9a1,Aspdh,Cbr4,Ctbp2,Decr1,Dld,Ero1l,Fdxr,Gapdh,Gapdh,Gch1,Gclc,Gpd1l,H6pd,Hadh,Hao1,Hmbs,Hmgcr,Ivd,Me2,Nos1,Nqo2,Ogdhl,Sirt7,Soat1,Tdh,Txnrd2,Ugdh,Uxs1
GO Molecular Function	GO:0004674	protein serine/threonine kinase activity	70	0.0616	1	1	2.11	2.84	6	307	0.133	0.0195	3	121	432	unnamed,unnamed,unnamed,unnamed,unnamed,unnamed	unnamed,unnamed,unnamed,unnamed,unnamed,unnamed,unnamed,unnamed,unnamed,unnamed,unnamed,unnamed,unnamed,unnamed,unnamed,unnamed,unnamed,unnamed,unnamed,unnamed,unnamed,unnamed,unnamed,unnamed,unnamed,unnamed,unnamed,unnamed,unnamed,unnamed,unnamed,unnamed,unnamed,unnamed,unnamed,unnamed,unnamed,unnamed,unnamed,unnamed,unnamed,unnamed,unnamed,unnamed,unnamed,unnamed,unnamed,unnamed,unnamed,unnamed…	Gak,Hipk4,Limk1	Acvr1b,Adck3,Adrbk1,Akt2,Akt3,Alpk2,Ankk1,Atm,B230120H23Rik,Bcr,Bmpr1a,Bmpr1b,Bmpr2,Braf,Brsk1,Cab39,Camk2d,Camk4,Camkk2,Ccnh,Cdc42bpa,Cdk14,Cdk5r1,Cdk7,Cdk8,Cdkl1,Cdkn1b,Chek1,Cit,Clk1,Clk2,Csnk1a1,Csnk1g2,Csnk2a1,Csnk2a2,Dclk1,Dyrk1a,Dyrk1b,Dyrk2,Eef2k,Ercc3,Ern1,Gak,Gm7168,Gtf2h2,Hipk2,Hipk3,Hipk4,Ikbke,Irak1,Itpka,Ksr1,Ksr2,Limk1,Lmtk3,Map2k2,Map2k6,Map3k13,Map3k3,Map3k5,Map3k7,Map3k9,Map4k2,…
GO Molecular Function	GO:0052742	phosphatidylinositol kinase activity	71	0.0631	1	1	15.4	0.0648	1	7	0.0222	0.143	1	6	14	unnamed	unnamed,unnamed,unnamed,unnamed,unnamed,unnamed,unnamed	Pik3c2b	Atm,Pik3c2b,Pik3c3,Pik3ca,Pik3cd,Pik3r2
GO Molecular Function	GO:0016303	1-phosphatidylinositol-3-kinase activity	71	0.0631	1	1	15.4	0.0648	1	7	0.0222	0.143	1	6	11	unnamed	unnamed,unnamed,unnamed,unnamed,unnamed,unnamed,unnamed	Pik3c2b	Atm,Pik3c2b,Pik3c3,Pik3ca,Pik3cd,Pik3r2
GO Molecular Function	GO:0019899	enzyme binding	73	0.0645	1	1	1.83	4.36	8	471	0.178	0.017	5	219	806	unnamed,unnamed,unnamed,unnamed,unnamed,unnamed,unnamed,unnamed	unnamed,unnamed,unnamed,unnamed,unnamed,unnamed,unnamed,unnamed,unnamed,unnamed,unnamed,unnamed,unnamed,unnamed,unnamed,unnamed,unnamed,unnamed,unnamed,unnamed,unnamed,unnamed,unnamed,unnamed,unnamed,unnamed,unnamed,unnamed,unnamed,unnamed,unnamed,unnamed,unnamed,unnamed,unnamed,unnamed,unnamed,unnamed,unnamed,unnamed,unnamed,unnamed,unnamed,unnamed,unnamed,unnamed,unnamed,unnamed,unnamed,unnamed…	Brca1,Dis3l,March5,Mdm4,Nefl	2410091C18Rik,2700078E11Rik,Acat1,Adamts4,Adipor1,Agap2,Akap11,Akap6,Akt2,Apbb2,Apc,Apoa1,Appl1,Ar,Arf6,Arhgef2,Arih1,Arpp19,Arrb1,Atp6v0c,Atp6v1g3,Axin2,Bag5,Bcl10,Bcl2,Bicd1,Bnip3,Braf,Brca1,Brsk1,Cab39,Cabyr,Calm2,Calm3,Camk2n1,Cblb,Ccdc64,Ccnd1,Ccnd2,Ccnh,Ccnk,Ccno,Ccnt1,Ccnt2,Ccny,Cdc6,Cdk5r1,Cdk5rap2,Cdkn1b,Chrna7,Ctnnb1,Ctnnd1,Cul1,Cul3,Cul4b,Cul5,Cul7,Cyfip1,Cyld,Daam1,Dennd5a,Dgki,Dis3l,…
GO Molecular Function	GO:0035639	purine ribonucleoside triphosphate binding	74	0.0666	1	1	1.53	8.47	13	915	0.289	0.0142	7	395	1854	unnamed,unnamed,unnamed,unnamed,unnamed,unnamed,unnamed,unnamed,unnamed,unnamed,unnamed,unnamed,unnamed	unnamed,unnamed,unnamed,unnamed,unnamed,unnamed,unnamed,unnamed,unnamed,unnamed,unnamed,unnamed,unnamed,unnamed,unnamed,unnamed,unnamed,unnamed,unnamed,unnamed,unnamed,unnamed,unnamed,unnamed,unnamed,unnamed,unnamed,unnamed,unnamed,unnamed,unnamed,unnamed,unnamed,unnamed,unnamed,unnamed,unnamed,unnamed,unnamed,unnamed,unnamed,unnamed,unnamed,unnamed,unnamed,unnamed,unnamed,unnamed,unnamed,unnamed…	Gak,Hipk4,Hspa1b,Ide,Limk1,Ppip5k2,Rnd2	4933405O20Rik,Aarsd1,Abca8b,Abcb5,Abcb7,Abcc4,Abcg1,Abcg4,Acsl6,Actr1b,Actr2,Actr3b,Acvr1b,Adck3,Adcy5,Adcy9,Adrbk1,Afg3l1,Afg3l2,Agap1,Agap2,Agap3,Agk,Ak8,Akt2,Akt3,Alpk2,Ankk1,Arf1,Arf3,Arf4,Arf6,Arhgap5,Arl1,Arl10,Arl15,Arl3,Arl5b,Arl5c,Arl8a,Asns,Atad1,Atl3,Atm,Atp10a,Atp13a3,Atp1a3,Atp2a2,Atp2b3,Atp2b4,Atp2c2,Atp8a2,Atp9b,Atrx,B230120H23Rik,Baz1b,Bbs10,Bcr,Bmpr1a,Bmpr1b,Bmpr2,Braf,Brsk1,Btaf…
GO Molecular Function	GO:0015036	disulfide oxidoreductase activity	75	0.0718	1	1	13.5	0.0741	1	8	0.0222	0.125	1	5	29	unnamed	unnamed,unnamed,unnamed,unnamed,unnamed,unnamed,unnamed,unnamed	Pdia3	Enox2,Glrx3,Pdia3,Ptges2,Txnl1
GO Molecular Function	GO:0016860	intramolecular oxidoreductase activity	75	0.0718	1	1	13.5	0.0741	1	8	0.0222	0.125	1	6	40	unnamed	unnamed,unnamed,unnamed,unnamed,unnamed,unnamed,unnamed,unnamed	Pdia3	Ebpl,Erp44,Gpi1,Idi2,Pdia3,Ptges2
GO Molecular Function	GO:0015035	protein disulfide oxidoreductase activity	75	0.0718	1	1	13.5	0.0741	1	8	0.0222	0.125	1	5	24	unnamed	unnamed,unnamed,unnamed,unnamed,unnamed,unnamed,unnamed,unnamed	Pdia3	Enox2,Glrx3,Pdia3,Ptges2,Txnl1
GO Molecular Function	GO:0032555	purine ribonucleotide binding	78	0.0752	1	1	1.51	8.63	13	932	0.289	0.0139	7	400	1883	unnamed,unnamed,unnamed,unnamed,unnamed,unnamed,unnamed,unnamed,unnamed,unnamed,unnamed,unnamed,unnamed	unnamed,unnamed,unnamed,unnamed,unnamed,unnamed,unnamed,unnamed,unnamed,unnamed,unnamed,unnamed,unnamed,unnamed,unnamed,unnamed,unnamed,unnamed,unnamed,unnamed,unnamed,unnamed,unnamed,unnamed,unnamed,unnamed,unnamed,unnamed,unnamed,unnamed,unnamed,unnamed,unnamed,unnamed,unnamed,unnamed,unnamed,unnamed,unnamed,unnamed,unnamed,unnamed,unnamed,unnamed,unnamed,unnamed,unnamed,unnamed,unnamed,unnamed…	Gak,Hipk4,Hspa1b,Ide,Limk1,Ppip5k2,Rnd2	4933405O20Rik,Aarsd1,Abca8b,Abcb5,Abcb7,Abcc4,Abcg1,Abcg4,Acsl6,Actr1b,Actr2,Actr3b,Acvr1b,Adck3,Adcy5,Adcy9,Adrbk1,Afg3l1,Afg3l2,Agap1,Agap2,Agap3,Agk,Ak8,Akt2,Akt3,Alpk2,Ankk1,Arf1,Arf3,Arf4,Arf6,Arhgap5,Arl1,Arl10,Arl15,Arl3,Arl5b,Arl5c,Arl8a,Asns,Atad1,Atl3,Atm,Atp10a,Atp13a3,Atp1a3,Atp2a2,Atp2b3,Atp2b4,Atp2c2,Atp8a2,Atp9b,Atrx,B230120H23Rik,Baz1b,Bbs10,Bcr,Bmpr1a,Bmpr1b,Bmpr2,Braf,Brsk1,Btaf…
GO Molecular Function	GO:0032553	ribonucleotide binding	78	0.0752	1	1	1.51	8.63	13	932	0.289	0.0139	7	400	1884	unnamed,unnamed,unnamed,unnamed,unnamed,unnamed,unnamed,unnamed,unnamed,unnamed,unnamed,unnamed,unnamed	unnamed,unnamed,unnamed,unnamed,unnamed,unnamed,unnamed,unnamed,unnamed,unnamed,unnamed,unnamed,unnamed,unnamed,unnamed,unnamed,unnamed,unnamed,unnamed,unnamed,unnamed,unnamed,unnamed,unnamed,unnamed,unnamed,unnamed,unnamed,unnamed,unnamed,unnamed,unnamed,unnamed,unnamed,unnamed,unnamed,unnamed,unnamed,unnamed,unnamed,unnamed,unnamed,unnamed,unnamed,unnamed,unnamed,unnamed,unnamed,unnamed,unnamed…	Gak,Hipk4,Hspa1b,Ide,Limk1,Ppip5k2,Rnd2	4933405O20Rik,Aarsd1,Abca8b,Abcb5,Abcb7,Abcc4,Abcg1,Abcg4,Acsl6,Actr1b,Actr2,Actr3b,Acvr1b,Adck3,Adcy5,Adcy9,Adrbk1,Afg3l1,Afg3l2,Agap1,Agap2,Agap3,Agk,Ak8,Akt2,Akt3,Alpk2,Ankk1,Arf1,Arf3,Arf4,Arf6,Arhgap5,Arl1,Arl10,Arl15,Arl3,Arl5b,Arl5c,Arl8a,Asns,Atad1,Atl3,Atm,Atp10a,Atp13a3,Atp1a3,Atp2a2,Atp2b3,Atp2b4,Atp2c2,Atp8a2,Atp9b,Atrx,B230120H23Rik,Baz1b,Bbs10,Bcr,Bmpr1a,Bmpr1b,Bmpr2,Braf,Brsk1,Btaf…
GO Molecular Function	GO:0017076	purine nucleotide binding	80	0.0801	1	1	1.49	8.71	13	941	0.289	0.0138	7	403	1891	unnamed,unnamed,unnamed,unnamed,unnamed,unnamed,unnamed,unnamed,unnamed,unnamed,unnamed,unnamed,unnamed	unnamed,unnamed,unnamed,unnamed,unnamed,unnamed,unnamed,unnamed,unnamed,unnamed,unnamed,unnamed,unnamed,unnamed,unnamed,unnamed,unnamed,unnamed,unnamed,unnamed,unnamed,unnamed,unnamed,unnamed,unnamed,unnamed,unnamed,unnamed,unnamed,unnamed,unnamed,unnamed,unnamed,unnamed,unnamed,unnamed,unnamed,unnamed,unnamed,unnamed,unnamed,unnamed,unnamed,unnamed,unnamed,unnamed,unnamed,unnamed,unnamed,unnamed…	Gak,Hipk4,Hspa1b,Ide,Limk1,Ppip5k2,Rnd2	4933405O20Rik,Aarsd1,Abca8b,Abcb5,Abcb7,Abcc4,Abcg1,Abcg4,Acsl6,Actr1b,Actr2,Actr3b,Acvr1b,Adck3,Adcy5,Adcy9,Adrbk1,Afg3l1,Afg3l2,Agap1,Agap2,Agap3,Agk,Ak8,Akt2,Akt3,Alpk2,Ankk1,Arf1,Arf3,Arf4,Arf6,Arhgap5,Arl1,Arl10,Arl15,Arl3,Arl5b,Arl5c,Arl8a,Asns,Atad1,Atl3,Atm,Atp10a,Atp13a3,Atp1a3,Atp2a2,Atp2b3,Atp2b4,Atp2c2,Atp8a2,Atp9b,Atrx,B230120H23Rik,Baz1b,Bbs10,Bcr,Bmpr1a,Bmpr1b,Bmpr2,Braf,Brsk1,Btaf…
GO Molecular Function	GO:0003684	damaged DNA binding	81	0.0804	1	1	12	0.0833	1	9	0.0222	0.111	1	6	36	unnamed	unnamed,unnamed,unnamed,unnamed,unnamed,unnamed,unnamed,unnamed,unnamed	Brca1	Brca1,Msh2,Polb,Polh,Rad23b,Rev1
GO Molecular Function	GO:0004896	cytokine receptor activity	82	0.0889	1	1	10.8	0.0926	1	10	0.0222	0.1	1	6	49	unnamed	unnamed,unnamed,unnamed,unnamed,unnamed,unnamed,unnamed,unnamed,unnamed,unnamed	Il6st	Gm614,Ifnar1,Il12rb2,Il5ra,Il6st,Lifr
GO Molecular Function	GO:0004365	glyceraldehyde-3-phosphate dehydrogenase (NAD+) (phosphorylating) activity	82	0.0889	1	1	10.8	0.0926	1	10	0.0222	0.1	1	2	5	unnamed	unnamed,unnamed,unnamed,unnamed,unnamed,unnamed,unnamed,unnamed,unnamed,unnamed	Gapdh	Gapdh,Gapdh
GO Molecular Function	GO:0046983	protein dimerization activity	84	0.0951	1	1	1.88	3.19	6	344	0.133	0.0174	4	144	683	unnamed,unnamed,unnamed,unnamed,unnamed,unnamed	unnamed,unnamed,unnamed,unnamed,unnamed,unnamed,unnamed,unnamed,unnamed,unnamed,unnamed,unnamed,unnamed,unnamed,unnamed,unnamed,unnamed,unnamed,unnamed,unnamed,unnamed,unnamed,unnamed,unnamed,unnamed,unnamed,unnamed,unnamed,unnamed,unnamed,unnamed,unnamed,unnamed,unnamed,unnamed,unnamed,unnamed,unnamed,unnamed,unnamed,unnamed,unnamed,unnamed,unnamed,unnamed,unnamed,unnamed,unnamed,unnamed,unnamed…	Gipc1,Limk1,S100b,Txnrd2	Abcg1,Abcg4,Acat1,Actn1,Add2,Adipor1,Adrb1,Ahr,Aldh9a1,Amph,Arnt2,Asgr1,Asns,Atf1,Atf2,Atf3,Atg7,Atm,Bach2,Bcl2,Bhlha15,Bmpr1a,Bnip3,Braf,Cabyr,Cadm1,Cda,Cep57,Chka,Crebl2,Cxcl13,Epas1,Foxp4,Fzd1,Fzd9,Gabpa,Gabpb2,Gamt,Gars,Gca,Gch1,Gclc,Gclm,Gipc1,Gjb1,Gopc,Gpd1l,Grik2,Grin2b,Grpel1,Gtf2a1,Hand1,Hes1,Heyl,Hgf,Hmgcr,Homer2,Hsp90aa1,Irak1,Itgav,Jam2,Junb,Kcnk9,Ldb1,Limk1,Lrp6,Ltc4s,Map3k13,Map3k5,…
GO Molecular Function	GO:0017017	MAP kinase tyrosine/serine/threonine phosphatase activity	85	0.0974	1	1	9.82	0.102	1	11	0.0222	0.0909	1	5	13	unnamed	unnamed,unnamed,unnamed,unnamed,unnamed,unnamed,unnamed,unnamed,unnamed,unnamed,unnamed	Dusp1	Dusp1,Dusp14,Dusp4,Dusp8,Dusp9
GO Molecular Function	GO:0016896	exoribonuclease activity, producing 5'-phosphomonoesters	85	0.0974	1	1	9.82	0.102	1	11	0.0222	0.0909	1	3	8	unnamed	unnamed,unnamed,unnamed,unnamed,unnamed,unnamed,unnamed,unnamed,unnamed,unnamed,unnamed	Dis3l	Dis3l,Isg20,Parn
GO Molecular Function	GO:0004890	GABA-A receptor activity	85	0.0974	1	1	9.82	0.102	1	11	0.0222	0.0909	2	6	18	unnamed	unnamed,unnamed,unnamed,unnamed,unnamed,unnamed,unnamed,unnamed,unnamed,unnamed,unnamed	Gabra2,Gabrg1	Gabra1,Gabra2,Gabra3,Gabrb1,Gabrg1,Gabrg2
GO Molecular Function	GO:0000175	3'-5'-exoribonuclease activity	85	0.0974	1	1	9.82	0.102	1	11	0.0222	0.0909	1	3	6	unnamed	unnamed,unnamed,unnamed,unnamed,unnamed,unnamed,unnamed,unnamed,unnamed,unnamed,unnamed	Dis3l	Dis3l,Isg20,Parn
GO Molecular Function	GO:0004532	exoribonuclease activity	85	0.0974	1	1	9.82	0.102	1	11	0.0222	0.0909	1	3	9	unnamed	unnamed,unnamed,unnamed,unnamed,unnamed,unnamed,unnamed,unnamed,unnamed,unnamed,unnamed	Dis3l	Dis3l,Isg20,Parn
GO Molecular Function	GO:0016491	oxidoreductase activity	90	0.0996	1	1	2.01	2.48	5	268	0.111	0.0187	5	138	747	unnamed,unnamed,unnamed,unnamed,unnamed	unnamed,unnamed,unnamed,unnamed,unnamed,unnamed,unnamed,unnamed,unnamed,unnamed,unnamed,unnamed,unnamed,unnamed,unnamed,unnamed,unnamed,unnamed,unnamed,unnamed,unnamed,unnamed,unnamed,unnamed,unnamed,unnamed,unnamed,unnamed,unnamed,unnamed,unnamed,unnamed,unnamed,unnamed,unnamed,unnamed,unnamed,unnamed,unnamed,unnamed,unnamed,unnamed,unnamed,unnamed,unnamed,unnamed,unnamed,unnamed,unnamed,unnamed…	Gapdh,Ogdhl,Pdia3,Txnrd2,mt-Nd4	2810405K02Rik,4933405O20Rik,Acad9,Adi1,Ado,Agps,Aifm3,Akr1b10,Akr1b7,Aldh4a1,Aldh5a1,Aldh7a1,Aldh9a1,Alkbh2,Alkbh3,Alkbh5,Alkbh8,Aspdh,Asphd1,Asphd2,Bdh1,Cbr4,Cox10,Cox15,Cox5b,Cox7a1,Cox7a2,Cp,Ctbp2,Cyp20a1,Cyp26b1,Cyp26c1,Cyp27b1,Cyp2d22,Cyp2d26,Cyp2j11-ps,Cyp2j6,Cyp2r1,Cyp2u1,Cyp3a57,Cyp46a1,Cyp4x1,Cyp7a1,Cyp7b1,Decr1,Dhrs3,Dio2,Dld,Egln1,Enox1,Enox2,Ero1l,Fa2h,Fads2,Fads3,Fads6,Far1,Fdxr,Gapd…
GO Molecular Function	GO:0004758	serine C-palmitoyltransferase activity	91	0.106	1	1	9	0.111	1	12	0.0222	0.0833	1	3	5	unnamed	unnamed,unnamed,unnamed,unnamed,unnamed,unnamed,unnamed,unnamed,unnamed,unnamed,unnamed,unnamed	1110032A04Rik	1110002B05Rik,1110032A04Rik,Sptlc2
GO Molecular Function	GO:0016773	phosphotransferase activity, alcohol group as acceptor	92	0.11	1	1	1.71	4.1	7	443	0.156	0.0158	4	180	717	unnamed,unnamed,unnamed,unnamed,unnamed,unnamed,unnamed	unnamed,unnamed,unnamed,unnamed,unnamed,unnamed,unnamed,unnamed,unnamed,unnamed,unnamed,unnamed,unnamed,unnamed,unnamed,unnamed,unnamed,unnamed,unnamed,unnamed,unnamed,unnamed,unnamed,unnamed,unnamed,unnamed,unnamed,unnamed,unnamed,unnamed,unnamed,unnamed,unnamed,unnamed,unnamed,unnamed,unnamed,unnamed,unnamed,unnamed,unnamed,unnamed,unnamed,unnamed,unnamed,unnamed,unnamed,unnamed,unnamed,unnamed…	Gak,Hipk4,Limk1,Pik3c2b	Acvr1b,Adck3,Adrbk1,Agk,Akt2,Akt3,Alpk2,Ankk1,Atm,B230120H23Rik,Baz1b,Bcr,Bmpr1a,Bmpr1b,Bmpr2,Braf,Brsk1,Cab39,Camk2d,Camk4,Camkk2,Ccnd1,Ccnh,Cdc42bpa,Cdk14,Cdk5r1,Cdk7,Cdk8,Cdkl1,Cdkn1b,Chek1,Chka,Cit,Clk1,Clk2,Csnk1a1,Csnk1g2,Csnk2a1,Csnk2a2,D8Ertd82e,Dclk1,Dgkb,Dgke,Dgkg,Dgki,Dolk,Dyrk1a,Dyrk1b,Dyrk2,Eef2k,Epha5,Ercc3,Ern1,Fastkd2,Fert2,Fgfr3,Fyn,G6pc,Gak,Gm7168,Gne,Gtf2h2,Gyk,Hipk2,Hipk3,Hipk…
GO Molecular Function	GO:0033549	MAP kinase phosphatase activity	93	0.114	1	1	8.31	0.12	1	13	0.0222	0.0769	1	6	14	unnamed	unnamed,unnamed,unnamed,unnamed,unnamed,unnamed,unnamed,unnamed,unnamed,unnamed,unnamed,unnamed,unnamed	Dusp1	Dusp1,Dusp14,Dusp3,Dusp4,Dusp8,Dusp9
GO Molecular Function	GO:0016655	oxidoreductase activity, acting on NADH or NADPH, quinone or similar compound as acceptor	93	0.114	1	1	8.31	0.12	1	13	0.0222	0.0769	1	8	22	unnamed	unnamed,unnamed,unnamed,unnamed,unnamed,unnamed,unnamed,unnamed,unnamed,unnamed,unnamed,unnamed,unnamed	mt-Nd4	Ndufa12,Ndufa13,Ndufaf2,Ndufb3,Ndufs1,Ndufs4,Ndufs7,mt-Nd4
GO Molecular Function	GO:0008137	NADH dehydrogenase (ubiquinone) activity	93	0.114	1	1	8.31	0.12	1	13	0.0222	0.0769	1	8	19	unnamed	unnamed,unnamed,unnamed,unnamed,unnamed,unnamed,unnamed,unnamed,unnamed,unnamed,unnamed,unnamed,unnamed	mt-Nd4	Ndufa12,Ndufa13,Ndufaf2,Ndufb3,Ndufs1,Ndufs4,Ndufs7,mt-Nd4
GO Molecular Function	GO:0001727	lipid kinase activity	93	0.114	1	1	8.31	0.12	1	13	0.0222	0.0769	1	9	27	unnamed	unnamed,unnamed,unnamed,unnamed,unnamed,unnamed,unnamed,unnamed,unnamed,unnamed,unnamed,unnamed,unnamed	Pik3c2b	Agk,Atm,Pik3c2b,Pik3c3,Pik3ca,Pik3cd,Pik3r2,Pip4k2a,Sphk1
GO Molecular Function	GO:0016301	kinase activity	97	0.115	1	1	1.61	4.95	8	535	0.178	0.015	5	215	841	unnamed,unnamed,unnamed,unnamed,unnamed,unnamed,unnamed,unnamed	unnamed,unnamed,unnamed,unnamed,unnamed,unnamed,unnamed,unnamed,unnamed,unnamed,unnamed,unnamed,unnamed,unnamed,unnamed,unnamed,unnamed,unnamed,unnamed,unnamed,unnamed,unnamed,unnamed,unnamed,unnamed,unnamed,unnamed,unnamed,unnamed,unnamed,unnamed,unnamed,unnamed,unnamed,unnamed,unnamed,unnamed,unnamed,unnamed,unnamed,unnamed,unnamed,unnamed,unnamed,unnamed,unnamed,unnamed,unnamed,unnamed,unnamed…	Gak,Hipk4,Limk1,Pik3c2b,Ppip5k2	Acvr1b,Adck3,Adrbk1,Agk,Agphd1,Ak8,Akap13,Akap4,Akap6,Akt2,Akt3,Alpk2,Ankk1,Atm,B230120H23Rik,Baz1b,Bcr,Bmpr1a,Bmpr1b,Bmpr2,Braf,Brsk1,Cab39,Camk2d,Camk4,Camkk2,Ccnd1,Ccnh,Cdc42bpa,Cdk14,Cdk5r1,Cdk7,Cdk8,Cdkl1,Cdkn1b,Chek1,Chka,Cit,Ckm,Ckmt2,Clk1,Clk2,Cmpk1,Cmpk2,Col4a3bp,Crk,Csnk1a1,Csnk1g2,Csnk2a1,Csnk2a2,D8Ertd82e,Dclk1,Dgkb,Dgke,Dgkg,Dgki,Dolk,Dtymk,Dusp9,Dyrk1a,Dyrk1b,Dyrk2,Eef2k,Epha5,Ercc3…
GO Molecular Function	GO:0048037	cofactor binding	98	0.122	1	1	2.45	1.22	3	132	0.0667	0.0227	3	52	275	unnamed,unnamed,unnamed	unnamed,unnamed,unnamed,unnamed,unnamed,unnamed,unnamed,unnamed,unnamed,unnamed,unnamed,unnamed,unnamed,unnamed,unnamed,unnamed,unnamed,unnamed,unnamed,unnamed,unnamed,unnamed,unnamed,unnamed,unnamed,unnamed,unnamed,unnamed,unnamed,unnamed,unnamed,unnamed,unnamed,unnamed,unnamed,unnamed,unnamed,unnamed,unnamed,unnamed,unnamed,unnamed,unnamed,unnamed,unnamed,unnamed,unnamed,unnamed,unnamed,unnamed…	Gapdh,Ogdhl,Txnrd2	4933405O20Rik,Acad9,Acat1,Acbd3,Acbd5,Acbd6,Accsl,Agps,Aifm3,Aldh5a1,Aldh9a1,Asns,Aspdh,Cbr4,Ctbp2,Decr1,Dld,Ero1l,Fdxr,Gad2,Gapdh,Gapdh,Gch1,Gclc,Gm6756,Got1,Gpd1l,H6pd,Hadh,Hao1,Hhipl1,Hmbs,Hmgcr,Ivd,Me2,Ndufab1,Ndufs7,Nos1,Nqo2,Ogdhl,Pgam2,Psat1,Scly,Sepsecs,Sirt7,Soat1,Sptlc2,Tdh,Thnsl1,Txnrd2,Ugdh,Uxs1
GO Molecular Function	GO:0003723	RNA binding	99	0.122	1	1	1.76	3.42	6	369	0.133	0.0163	4	151	763	unnamed,unnamed,unnamed,unnamed,unnamed,unnamed	unnamed,unnamed,unnamed,unnamed,unnamed,unnamed,unnamed,unnamed,unnamed,unnamed,unnamed,unnamed,unnamed,unnamed,unnamed,unnamed,unnamed,unnamed,unnamed,unnamed,unnamed,unnamed,unnamed,unnamed,unnamed,unnamed,unnamed,unnamed,unnamed,unnamed,unnamed,unnamed,unnamed,unnamed,unnamed,unnamed,unnamed,unnamed,unnamed,unnamed,unnamed,unnamed,unnamed,unnamed,unnamed,unnamed,unnamed,unnamed,unnamed,unnamed…	Brca1,Dis3l,Eif4h,Thoc3	2610101N10Rik,4921513D23Rik,4921515J06Rik,A1cf,Adad2,Adar,Adat1,Aff2,Alkbh8,Ankhd1,Atxn1,Brca1,Ccnt1,Cdc5l,Celf2,Celf4,Cherp,Cpeb1,Cpeb2,Cpeb3,Cpeb4,Cpsf2,Csdc2,Dcp2,Ddx18,Ddx19a,Ddx25,Ddx46,Ddx49,Ddx56,Ddx6,Dhx29,Dhx8,Dimt1,Dis3l,Drosha,Eef1a2,Eef1b2,Eef2k,Eif2c1,Eif2c2,Eif2c3,Eif3c,Eif3d,Eif4a2,Eif4g3,Eif4h,Elavl2,Elavl3,G3bp1,Gemin5,Glrb,Grsf1,Hnrnpa3,Hnrnpc,Igf2bp2,Ireb2,Isg20,Khdc1b,Larp4b,L…
GO Molecular Function	GO:0048306	calcium-dependent protein binding	100	0.138	1	1	6.75	0.148	1	16	0.0222	0.0625	1	7	32	unnamed	unnamed,unnamed,unnamed,unnamed,unnamed,unnamed,unnamed,unnamed,unnamed,unnamed,unnamed,unnamed,unnamed,unnamed,unnamed,unnamed	S100b	Cabp1,Calm2,Calm3,Mmp13,Myo1d,S100b,S100pbp
GO Molecular Function	GO:0004672	protein kinase activity	101	0.146	1	1	1.67	3.59	6	388	0.133	0.0155	3	149	605	unnamed,unnamed,unnamed,unnamed,unnamed,unnamed	unnamed,unnamed,unnamed,unnamed,unnamed,unnamed,unnamed,unnamed,unnamed,unnamed,unnamed,unnamed,unnamed,unnamed,unnamed,unnamed,unnamed,unnamed,unnamed,unnamed,unnamed,unnamed,unnamed,unnamed,unnamed,unnamed,unnamed,unnamed,unnamed,unnamed,unnamed,unnamed,unnamed,unnamed,unnamed,unnamed,unnamed,unnamed,unnamed,unnamed,unnamed,unnamed,unnamed,unnamed,unnamed,unnamed,unnamed,unnamed,unnamed,unnamed…	Gak,Hipk4,Limk1	Acvr1b,Adck3,Adrbk1,Akt2,Akt3,Alpk2,Ankk1,Atm,B230120H23Rik,Baz1b,Bcr,Bmpr1a,Bmpr1b,Bmpr2,Braf,Brsk1,Cab39,Camk2d,Camk4,Camkk2,Ccnd1,Ccnh,Cdc42bpa,Cdk14,Cdk5r1,Cdk7,Cdk8,Cdkl1,Cdkn1b,Chek1,Cit,Clk1,Clk2,Csnk1a1,Csnk1g2,Csnk2a1,Csnk2a2,D8Ertd82e,Dclk1,Dyrk1a,Dyrk1b,Dyrk2,Eef2k,Epha5,Ercc3,Ern1,Fastkd2,Fert2,Fgfr3,Fyn,Gak,Gm7168,Gtf2h2,Hipk2,Hipk3,Hipk4,Ikbke,Irak1,Itpka,Kcnh3,Kcnh5,Ksr1,Ksr2,Limk1…
GO Molecular Function	GO:0003954	NADH dehydrogenase activity	102	0.154	1	1	6	0.167	1	18	0.0222	0.0556	1	9	20	unnamed	unnamed,unnamed,unnamed,unnamed,unnamed,unnamed,unnamed,unnamed,unnamed,unnamed,unnamed,unnamed,unnamed,unnamed,unnamed,unnamed,unnamed,unnamed	mt-Nd4	Ndufa12,Ndufa13,Ndufa9,Ndufaf2,Ndufb3,Ndufs1,Ndufs4,Ndufs7,mt-Nd4
GO Molecular Function	GO:0016796	exonuclease activity, active with either ribo- or deoxyribonucleic acids and producing 5'-phosphomonoesters	103	0.162	1	1	5.68	0.176	1	19	0.0222	0.0526	1	5	17	unnamed	unnamed,unnamed,unnamed,unnamed,unnamed,unnamed,unnamed,unnamed,unnamed,unnamed,unnamed,unnamed,unnamed,unnamed,unnamed,unnamed,unnamed,unnamed,unnamed	Dis3l	C77370,Dis3l,Isg20,Parn,Rad9
GO Molecular Function	GO:0016776	phosphotransferase activity, phosphate group as acceptor	103	0.162	1	1	5.68	0.176	1	19	0.0222	0.0526	1	7	29	unnamed	unnamed,unnamed,unnamed,unnamed,unnamed,unnamed,unnamed,unnamed,unnamed,unnamed,unnamed,unnamed,unnamed,unnamed,unnamed,unnamed,unnamed,unnamed,unnamed	Ppip5k2	Ak8,Cmpk1,Cmpk2,Dtymk,Ip6k2,Pmvk,Ppip5k2
GO Molecular Function	GO:0046982	protein heterodimerization activity	105	0.177	1	1	2.06	1.45	3	157	0.0667	0.0191	1	68	268	unnamed,unnamed,unnamed	unnamed,unnamed,unnamed,unnamed,unnamed,unnamed,unnamed,unnamed,unnamed,unnamed,unnamed,unnamed,unnamed,unnamed,unnamed,unnamed,unnamed,unnamed,unnamed,unnamed,unnamed,unnamed,unnamed,unnamed,unnamed,unnamed,unnamed,unnamed,unnamed,unnamed,unnamed,unnamed,unnamed,unnamed,unnamed,unnamed,unnamed,unnamed,unnamed,unnamed,unnamed,unnamed,unnamed,unnamed,unnamed,unnamed,unnamed,unnamed,unnamed,unnamed…	Limk1	Abcg1,Abcg4,Add2,Adipor1,Adrb1,Ahr,Amph,Arnt2,Atf1,Bcl2,Bnip3,Braf,Cabyr,Cxcl13,Epas1,Foxp4,Fzd1,Fzd9,Gabpa,Gabpb2,Gclc,Gclm,Grin2b,Gtf2a1,Hand1,Heyl,Hgf,Homer2,Irak1,Itgav,Jam2,Kcnk9,Limk1,Ltc4s,Mef2a,Mef2d,Mpp7,Nkx2-5,Nr3c2,Panx1,Panx2,Pbx3,Pdk1,Pdss2,Ppp2ca,Ppp3ca,Prmt8,Rab3gap2,Ralgapa2,Rims2,Robo1,Rraga,Sdcbp2,Sox5,Spna2,Syt10,Syt14,Syt16,Syt3,Tcf12,Tcf4,Tcfap2e,Terf1,Tgfb2,Tlr1,Tpd52l1,Vapb…
GO Molecular Function	GO:0016620	oxidoreductase activity, acting on the aldehyde or oxo group of donors, NAD or NADP as acceptor	106	0.178	1	1	5.14	0.194	1	21	0.0222	0.0476	1	7	34	unnamed	unnamed,unnamed,unnamed,unnamed,unnamed,unnamed,unnamed,unnamed,unnamed,unnamed,unnamed,unnamed,unnamed,unnamed,unnamed,unnamed,unnamed,unnamed,unnamed,unnamed,unnamed	Gapdh	Aldh4a1,Aldh5a1,Aldh7a1,Aldh9a1,Far1,Gapdh,Gapdh
GO Molecular Function	GO:0016917	GABA receptor activity	107	0.185	1	1	4.91	0.204	1	22	0.0222	0.0455	2	8	21	unnamed	unnamed,unnamed,unnamed,unnamed,unnamed,unnamed,unnamed,unnamed,unnamed,unnamed,unnamed,unnamed,unnamed,unnamed,unnamed,unnamed,unnamed,unnamed,unnamed,unnamed,unnamed,unnamed	Gabra2,Gabrg1	Gabbr1,Gabbr2,Gabra1,Gabra2,Gabra3,Gabrb1,Gabrg1,Gabrg2
GO Molecular Function	GO:0050660	flavin adenine dinucleotide binding	107	0.185	1	1	4.91	0.204	1	22	0.0222	0.0455	1	8	77	unnamed	unnamed,unnamed,unnamed,unnamed,unnamed,unnamed,unnamed,unnamed,unnamed,unnamed,unnamed,unnamed,unnamed,unnamed,unnamed,unnamed,unnamed,unnamed,unnamed,unnamed,unnamed,unnamed	Txnrd2	Acad9,Agps,Aifm3,Dld,Ero1l,Ivd,Nos1,Txnrd2
GO Molecular Function	GO:0016408	C-acyltransferase activity	107	0.185	1	1	4.91	0.204	1	22	0.0222	0.0455	1	5	16	unnamed	unnamed,unnamed,unnamed,unnamed,unnamed,unnamed,unnamed,unnamed,unnamed,unnamed,unnamed,unnamed,unnamed,unnamed,unnamed,unnamed,unnamed,unnamed,unnamed,unnamed,unnamed,unnamed	1110032A04Rik	1110002B05Rik,1110032A04Rik,Acat1,Slc27a3,Sptlc2
GO Molecular Function	GO:0008408	3'-5' exonuclease activity	107	0.185	1	1	4.91	0.204	1	22	0.0222	0.0455	1	7	21	unnamed	unnamed,unnamed,unnamed,unnamed,unnamed,unnamed,unnamed,unnamed,unnamed,unnamed,unnamed,unnamed,unnamed,unnamed,unnamed,unnamed,unnamed,unnamed,unnamed,unnamed,unnamed,unnamed	Dis3l	C77370,Dis3l,Exd1,Exd2,Isg20,Parn,Rad9
GO Molecular Function	GO:0016209	antioxidant activity	107	0.185	1	1	4.91	0.204	1	22	0.0222	0.0455	1	12	52	unnamed	unnamed,unnamed,unnamed,unnamed,unnamed,unnamed,unnamed,unnamed,unnamed,unnamed,unnamed,unnamed,unnamed,unnamed,unnamed,unnamed,unnamed,unnamed,unnamed,unnamed,unnamed,unnamed	Txnrd2	Ltc4s,Mgst3,Mpo,Prdx1,Prdx2,Prdx5,Prdx6,Ptgs1,Sod1,Sod3,Srxn1,Txnrd2
GO Molecular Function	GO:0070011	peptidase activity, acting on L-amino acid peptides	112	0.188	1	1	1.77	2.26	4	244	0.0889	0.0164	1	98	605	unnamed,unnamed,unnamed,unnamed	unnamed,unnamed,unnamed,unnamed,unnamed,unnamed,unnamed,unnamed,unnamed,unnamed,unnamed,unnamed,unnamed,unnamed,unnamed,unnamed,unnamed,unnamed,unnamed,unnamed,unnamed,unnamed,unnamed,unnamed,unnamed,unnamed,unnamed,unnamed,unnamed,unnamed,unnamed,unnamed,unnamed,unnamed,unnamed,unnamed,unnamed,unnamed,unnamed,unnamed,unnamed,unnamed,unnamed,unnamed,unnamed,unnamed,unnamed,unnamed,unnamed,unnamed…	Ide	4930444G20Rik,AF366264,Abhd5,Acr,Adam17,Adam19,Adam23,Adam33,Adam8,Adamts19,Adamts3,Adamts4,Adamtsl2,Afg3l1,Afg3l2,Agtpbp1,Amz1,Aph1c,Atg4b,Atxn3,Capn1,Capn6,Cd46,Cntnap5a,Cops5,Cps1,Cpxm2,Ctsc,Cyld,Ddi1,Dpp3,Dpp8,Erap1,Ggh,Gm5136,Hgf,Htra1,Ide,Immp2l,Josd2,Lmln,Lnpep,Lonrf1,Lonrf2,Mep1b,Metap2,Mmel1,Mmp13,Mmp15,Mmp16,Mmp17,Mmp19,Naalad2,Nln,Nomo1,Nrd1,Nrip2,Osgep,Otud5,Otud7a,Papln,Pappa,Prep,Pr…
GO Molecular Function	GO:0008233	peptidase activity	113	0.199	1	1	1.73	2.31	4	250	0.0889	0.016	1	101	634	unnamed,unnamed,unnamed,unnamed	unnamed,unnamed,unnamed,unnamed,unnamed,unnamed,unnamed,unnamed,unnamed,unnamed,unnamed,unnamed,unnamed,unnamed,unnamed,unnamed,unnamed,unnamed,unnamed,unnamed,unnamed,unnamed,unnamed,unnamed,unnamed,unnamed,unnamed,unnamed,unnamed,unnamed,unnamed,unnamed,unnamed,unnamed,unnamed,unnamed,unnamed,unnamed,unnamed,unnamed,unnamed,unnamed,unnamed,unnamed,unnamed,unnamed,unnamed,unnamed,unnamed,unnamed…	Ide	4930444G20Rik,AF366264,Abhd5,Acr,Adam17,Adam19,Adam23,Adam33,Adam8,Adamts19,Adamts3,Adamts4,Adamtsl2,Afg3l1,Afg3l2,Agtpbp1,Amz1,Aph1c,Atg4b,Atxn3,Capn1,Capn6,Cd46,Cntnap5a,Cops5,Cps1,Cpxm2,Ctsc,Cyld,Ddi1,Dpp3,Dpp8,Erap1,Ggh,Gm5136,Hgf,Htra1,Ide,Immp2l,Josd2,Lmln,Lnpep,Lonrf1,Lonrf2,Mep1b,Metap2,Mmel1,Mmp13,Mmp15,Mmp16,Mmp17,Mmp19,Naalad2,Nln,Nomo1,Nrd1,Nrip2,Osgep,Otud5,Otud7a,Papln,Pappa,Prep,Pr…
GO Molecular Function	GO:0016409	palmitoyltransferase activity	114	0.201	1	1	4.5	0.222	1	24	0.0222	0.0417	1	7	19	unnamed	unnamed,unnamed,unnamed,unnamed,unnamed,unnamed,unnamed,unnamed,unnamed,unnamed,unnamed,unnamed,unnamed,unnamed,unnamed,unnamed,unnamed,unnamed,unnamed,unnamed,unnamed,unnamed,unnamed,unnamed	1110032A04Rik	1110002B05Rik,1110032A04Rik,Cpt1c,Sptlc2,Zdhhc15,Zdhhc17,Zdhhc2
GO Molecular Function	GO:0016772	transferase activity, transferring phosphorus-containing groups	115	0.202	1	1	1.4	5.69	8	615	0.178	0.013	5	244	966	unnamed,unnamed,unnamed,unnamed,unnamed,unnamed,unnamed,unnamed	unnamed,unnamed,unnamed,unnamed,unnamed,unnamed,unnamed,unnamed,unnamed,unnamed,unnamed,unnamed,unnamed,unnamed,unnamed,unnamed,unnamed,unnamed,unnamed,unnamed,unnamed,unnamed,unnamed,unnamed,unnamed,unnamed,unnamed,unnamed,unnamed,unnamed,unnamed,unnamed,unnamed,unnamed,unnamed,unnamed,unnamed,unnamed,unnamed,unnamed,unnamed,unnamed,unnamed,unnamed,unnamed,unnamed,unnamed,unnamed,unnamed,unnamed…	Gak,Hipk4,Limk1,Pik3c2b,Ppip5k2	Aasdhppt,Acvr1b,Adck3,Adrbk1,Agk,Agphd1,Ak8,Akap13,Akap4,Akap6,Akt2,Akt3,Alpk2,Ankk1,Atm,B230120H23Rik,Baz1b,Bcr,Bmpr1a,Bmpr1b,Bmpr2,Braf,Brsk1,C77370,Cab39,Camk2d,Camk4,Camkk2,Ccnd1,Ccnh,Cdc42bpa,Cdipt,Cdk14,Cdk5r1,Cdk7,Cdk8,Cdkl1,Cdkn1b,Cds1,Chek1,Chka,Chrac1,Cit,Ckm,Ckmt2,Clk1,Clk2,Cmpk1,Cmpk2,Col4a3bp,Crk,Csnk1a1,Csnk1g2,Csnk2a1,Csnk2a2,D8Ertd82e,Dclk1,Dgkb,Dgke,Dgkg,Dgki,Dolk,Dtymk,Dusp9,Dyr…
GO Molecular Function	GO:0016787	hydrolase activity	116	0.209	1	1	1.28	9.34	12	1009	0.267	0.0119	9	441	2325	unnamed,unnamed,unnamed,unnamed,unnamed,unnamed,unnamed,unnamed,unnamed,unnamed,unnamed,unnamed	unnamed,unnamed,unnamed,unnamed,unnamed,unnamed,unnamed,unnamed,unnamed,unnamed,unnamed,unnamed,unnamed,unnamed,unnamed,unnamed,unnamed,unnamed,unnamed,unnamed,unnamed,unnamed,unnamed,unnamed,unnamed,unnamed,unnamed,unnamed,unnamed,unnamed,unnamed,unnamed,unnamed,unnamed,unnamed,unnamed,unnamed,unnamed,unnamed,unnamed,unnamed,unnamed,unnamed,unnamed,unnamed,unnamed,unnamed,unnamed,unnamed,unnamed…	Ctdspl2,Dis3l,Dusp1,Ide,Neu1,Pld3,Ppip5k2,Ppm1h,Zc3h12c	4930444G20Rik,A1cf,AF366264,Aarsd1,Abca8b,Abcb5,Abcb7,Abcc4,Abcg1,Abcg4,Abhd2,Abhd5,Abhd6,Acot13,Acp6,Acr,Acyp2,Adad2,Adam17,Adam19,Adam23,Adam33,Adam8,Adamts19,Adamts3,Adamts4,Adamtsl2,Adar,Adat1,Adat2,Adprhl2,Afg3l1,Afg3l2,Agap1,Agap3,Agmat,Agtpbp1,Alkbh2,Alkbh3,Ampd3,Amz1,Aoah,Aph1c,Arf6,Arl3,Arsa,Asah1,Asah2,Asrgl1,Atad1,Atg4b,Atl3,Atp10a,Atp13a3,Atp1a3,Atp1b1,Atp1b3,Atp1b4,Atp2a2,Atp2b3,Atp2…
GO Molecular Function	GO:0005198	structural molecule activity	117	0.212	1	1	1.88	1.59	3	172	0.0667	0.0174	4	83	475	unnamed,unnamed,unnamed	unnamed,unnamed,unnamed,unnamed,unnamed,unnamed,unnamed,unnamed,unnamed,unnamed,unnamed,unnamed,unnamed,unnamed,unnamed,unnamed,unnamed,unnamed,unnamed,unnamed,unnamed,unnamed,unnamed,unnamed,unnamed,unnamed,unnamed,unnamed,unnamed,unnamed,unnamed,unnamed,unnamed,unnamed,unnamed,unnamed,unnamed,unnamed,unnamed,unnamed,unnamed,unnamed,unnamed,unnamed,unnamed,unnamed,unnamed,unnamed,unnamed,unnamed…	Epb4.1l1,Gfap,Nefl,Nefm	Add2,Akap11,Akap6,Baz1b,Bves,Cldn11,Clta,Cltc,Col12a1,Col22a1,Cope,Crybb3,Ctnnb1,Cyld,Dag1,Dlg1,Dlg4,Dsp,Dusp19,Emilin1,Epb4.1,Epb4.1l1,Epb4.1l3,Gfap,Gm5148,Gm9104,Homer2,Ina,Lama1,Lamb1,Mal,Map2k2,Mospd4,Mpp7,Mrpl3,Mrpl35,Mrpl37,Mrpl47,Mrpl51,Mrps23,Mrps30,Mrps5,Mrps7,Myl6b,Mylpf,Myom2,Nefl,Nefm,Nell1,Nell2,Nexn,Oc90,Plp1,Pspc1,Rpl10l,Rpl11,Rpl14,Rpl15,Rpl27,Rpl30,Rpl36al,Rpl38,Rpl39,Rpl5,Rpl8,R…
GO Molecular Function	GO:0004518	nuclease activity	118	0.223	1	1	2.25	0.889	2	96	0.0444	0.0208	2	28	154	unnamed,unnamed	unnamed,unnamed,unnamed,unnamed,unnamed,unnamed,unnamed,unnamed,unnamed,unnamed,unnamed,unnamed,unnamed,unnamed,unnamed,unnamed,unnamed,unnamed,unnamed,unnamed,unnamed,unnamed,unnamed,unnamed,unnamed,unnamed,unnamed,unnamed,unnamed,unnamed,unnamed,unnamed,unnamed,unnamed,unnamed,unnamed,unnamed,unnamed,unnamed,unnamed,unnamed,unnamed,unnamed,unnamed,unnamed,unnamed,unnamed,unnamed,unnamed,unnamed…	Dis3l,Zc3h12c	C77370,Cnot6l,Dem1,Dis3l,Drosha,Eif2c2,Elac1,Endod1,Eri3,Ern1,Exd1,Exd2,G3bp1,Glrb,Isg20,Mus81,Nit1,Parn,Pop5,Rad9,Rpp14,Rpp38,Slk,Slx1b,Tatdn2,Zc3h12a,Zc3h12c,Zc3h12d
GO Molecular Function	GO:0004527	exonuclease activity	119	0.23	1	1	3.86	0.259	1	28	0.0222	0.0357	1	10	51	unnamed	unnamed,unnamed,unnamed,unnamed,unnamed,unnamed,unnamed,unnamed,unnamed,unnamed,unnamed,unnamed,unnamed,unnamed,unnamed,unnamed,unnamed,unnamed,unnamed,unnamed,unnamed,unnamed,unnamed,unnamed,unnamed,unnamed,unnamed,unnamed	Dis3l	C77370,Cnot6l,Dem1,Dis3l,Eri3,Exd1,Exd2,Isg20,Parn,Rad9
GO Molecular Function	GO:0004553	hydrolase activity, hydrolyzing O-glycosyl compounds	120	0.251	1	1	3.48	0.287	1	31	0.0222	0.0323	1	17	96	unnamed	unnamed,unnamed,unnamed,unnamed,unnamed,unnamed,unnamed,unnamed,unnamed,unnamed,unnamed,unnamed,unnamed,unnamed,unnamed,unnamed,unnamed,unnamed,unnamed,unnamed,unnamed,unnamed,unnamed,unnamed,unnamed,unnamed,unnamed,unnamed,unnamed,unnamed,unnamed	Neu1	Adprhl2,Edem1,Edem3,Fuca2,Gm608,Gusb,Lyg1,Man1a,Man1a2,Man2a2,Man2b2,Manba,Neu1,Neu3,Phkb,Sis,Treh
GO Molecular Function	GO:0016798	hydrolase activity, acting on glycosyl bonds	121	0.258	1	1	3.38	0.296	1	32	0.0222	0.0313	1	18	121	unnamed	unnamed,unnamed,unnamed,unnamed,unnamed,unnamed,unnamed,unnamed,unnamed,unnamed,unnamed,unnamed,unnamed,unnamed,unnamed,unnamed,unnamed,unnamed,unnamed,unnamed,unnamed,unnamed,unnamed,unnamed,unnamed,unnamed,unnamed,unnamed,unnamed,unnamed,unnamed,unnamed	Neu1	Adprhl2,Ccno,Edem1,Edem3,Fuca2,Gm608,Gusb,Lyg1,Man1a,Man1a2,Man2a2,Man2b2,Manba,Neu1,Neu3,Phkb,Sis,Treh
GO Molecular Function	GO:0005178	integrin binding	121	0.258	1	1	3.38	0.296	1	32	0.0222	0.0313	1	12	53	unnamed	unnamed,unnamed,unnamed,unnamed,unnamed,unnamed,unnamed,unnamed,unnamed,unnamed,unnamed,unnamed,unnamed,unnamed,unnamed,unnamed,unnamed,unnamed,unnamed,unnamed,unnamed,unnamed,unnamed,unnamed,unnamed,unnamed,unnamed,unnamed,unnamed,unnamed,unnamed,unnamed	Gfap	Adam17,Adam8,Cyr61,Gfap,Gfra1,Itgb1,Itgb6,Lamb1,Lyn,Npnt,Tnr,Vcam1
GO Molecular Function	GO:0070851	growth factor receptor binding	123	0.265	1	1	3.27	0.306	1	33	0.0222	0.0303	1	14	82	unnamed	unnamed,unnamed,unnamed,unnamed,unnamed,unnamed,unnamed,unnamed,unnamed,unnamed,unnamed,unnamed,unnamed,unnamed,unnamed,unnamed,unnamed,unnamed,unnamed,unnamed,unnamed,unnamed,unnamed,unnamed,unnamed,unnamed,unnamed,unnamed,unnamed,unnamed,unnamed,unnamed,unnamed	Il6st	Adam17,Erap1,Fert2,Fgf18,Fgf9,Frs2,Il6st,Irak1,Lyn,Nrg2,Pdgfa,Tgfa,Tlr5,Vegfa
GO Molecular Function	GO:0008138	protein tyrosine/serine/threonine phosphatase activity	123	0.265	1	1	3.27	0.306	1	33	0.0222	0.0303	1	13	42	unnamed	unnamed,unnamed,unnamed,unnamed,unnamed,unnamed,unnamed,unnamed,unnamed,unnamed,unnamed,unnamed,unnamed,unnamed,unnamed,unnamed,unnamed,unnamed,unnamed,unnamed,unnamed,unnamed,unnamed,unnamed,unnamed,unnamed,unnamed,unnamed,unnamed,unnamed,unnamed,unnamed,unnamed	Dusp1	Dusp1,Dusp14,Dusp15,Dusp19,Dusp3,Dusp4,Dusp8,Dusp9,Epm2a,Ssh1,Ssh2,Styx,Tpte
GO Molecular Function	GO:0005515	protein binding	125	0.267	1	1	1.12	21.4	24	2314	0.533	0.0104	25	1187	5448	unnamed,unnamed,unnamed,unnamed,unnamed,unnamed,unnamed,unnamed,unnamed,unnamed,unnamed,unnamed,unnamed,unnamed,unnamed,unnamed,unnamed,unnamed,unnamed,unnamed,unnamed,unnamed,unnamed,unnamed	unnamed,unnamed,unnamed,unnamed,unnamed,unnamed,unnamed,unnamed,unnamed,unnamed,unnamed,unnamed,unnamed,unnamed,unnamed,unnamed,unnamed,unnamed,unnamed,unnamed,unnamed,unnamed,unnamed,unnamed,unnamed,unnamed,unnamed,unnamed,unnamed,unnamed,unnamed,unnamed,unnamed,unnamed,unnamed,unnamed,unnamed,unnamed,unnamed,unnamed,unnamed,unnamed,unnamed,unnamed,unnamed,unnamed,unnamed,unnamed,unnamed,unnamed…	Arvcf,Brca1,Chfr,Cplx1,Dach1,Dip2a,Dis3l,Dnajb1,Epb4.1l1,Gak,Gfap,Gipc1,Hspa1b,Il6st,Limk1,March5,Mdm4,Nefl,Neu1,Pik3c2b,Rnd2,S100b,Tipin,Tnfrsf11a,Txnrd2	1110017D15Rik,1500010J02Rik,2410022L05Rik,2410091C18Rik,2700078E11Rik,2900011O08Rik,4922501C03Rik,AK028549,Aarsd1,Abcg1,Abcg4,Abhd5,Ablim1,Acan,Acat1,Acr,Acsl6,Actn1,Actr10,Actr2,Actr3b,Acvr1b,Adam17,Adam19,Adam8,Adamts4,Adcy5,Add2,Adipor1,Adrb1,Adrbk1,Aes,Afap1,Afap1l2,Agap2,Agtpbp1,Ahr,Ahsa1,Ahsa2,Akap11,Akap4,Akap6,Akt2,Alad,Alcam,Aldh9a1,Amph,Anapc1,Ank2,Ankrd13c,Ankrd32,Anks1,Anp32a,Ap1g1,Ap…
GO Molecular Function	GO:0051287	NAD binding	126	0.272	1	1	3.18	0.315	1	34	0.0222	0.0294	1	12	58	unnamed	unnamed,unnamed,unnamed,unnamed,unnamed,unnamed,unnamed,unnamed,unnamed,unnamed,unnamed,unnamed,unnamed,unnamed,unnamed,unnamed,unnamed,unnamed,unnamed,unnamed,unnamed,unnamed,unnamed,unnamed,unnamed,unnamed,unnamed,unnamed,unnamed,unnamed,unnamed,unnamed,unnamed,unnamed	Gapdh	4933405O20Rik,Aldh5a1,Aldh9a1,Ctbp2,Dld,Gapdh,Gapdh,Gpd1l,Hadh,Me2,Sirt7,Ugdh
GO Molecular Function	GO:0005086	ARF guanyl-nucleotide exchange factor activity	127	0.285	1	1	3	0.333	1	36	0.0222	0.0278	1	8	17	unnamed	unnamed,unnamed,unnamed,unnamed,unnamed,unnamed,unnamed,unnamed,unnamed,unnamed,unnamed,unnamed,unnamed,unnamed,unnamed,unnamed,unnamed,unnamed,unnamed,unnamed,unnamed,unnamed,unnamed,unnamed,unnamed,unnamed,unnamed,unnamed,unnamed,unnamed,unnamed,unnamed,unnamed,unnamed,unnamed,unnamed	Mon2	Cyth1,Cyth2,Cyth4,D10Bwg1379e,Iqsec1,Mon2,Psd2,Psd3
GO Molecular Function	GO:0004540	ribonuclease activity	128	0.299	1	1	2.84	0.352	1	38	0.0222	0.0263	1	10	64	unnamed	unnamed,unnamed,unnamed,unnamed,unnamed,unnamed,unnamed,unnamed,unnamed,unnamed,unnamed,unnamed,unnamed,unnamed,unnamed,unnamed,unnamed,unnamed,unnamed,unnamed,unnamed,unnamed,unnamed,unnamed,unnamed,unnamed,unnamed,unnamed,unnamed,unnamed,unnamed,unnamed,unnamed,unnamed,unnamed,unnamed,unnamed,unnamed	Dis3l	Dis3l,Drosha,Eif2c2,Elac1,Ern1,Isg20,Parn,Pop5,Rpp14,Rpp38
GO Molecular Function	GO:0005254	chloride channel activity	128	0.299	1	1	2.84	0.352	1	38	0.0222	0.0263	2	15	66	unnamed	unnamed,unnamed,unnamed,unnamed,unnamed,unnamed,unnamed,unnamed,unnamed,unnamed,unnamed,unnamed,unnamed,unnamed,unnamed,unnamed,unnamed,unnamed,unnamed,unnamed,unnamed,unnamed,unnamed,unnamed,unnamed,unnamed,unnamed,unnamed,unnamed,unnamed,unnamed,unnamed,unnamed,unnamed,unnamed,unnamed,unnamed,unnamed	Gabra2,Gabrg1	Abcc4,Ano5,Ano6,Ano7,Chrm5,Clcn5,Clcn6,Gabra1,Gabra2,Gabra3,Gabrb1,Gabrg1,Gabrg2,Glra1,Glrb
GO Molecular Function	GO:0016853	isomerase activity	130	0.305	1	1	2.77	0.361	1	39	0.0222	0.0256	1	21	136	unnamed	unnamed,unnamed,unnamed,unnamed,unnamed,unnamed,unnamed,unnamed,unnamed,unnamed,unnamed,unnamed,unnamed,unnamed,unnamed,unnamed,unnamed,unnamed,unnamed,unnamed,unnamed,unnamed,unnamed,unnamed,unnamed,unnamed,unnamed,unnamed,unnamed,unnamed,unnamed,unnamed,unnamed,unnamed,unnamed,unnamed,unnamed,unnamed,unnamed	Pdia3	2810055F11Rik,Ebpl,Erp44,Fkbp11,Fkbp1a,Fkbpl,Gne,Gpi1,Idi2,Lss,Mut,Pdia3,Pgam2,Pgm2l1,Pin1,Ppia,Ppif,Ppwd1,Ptges2,Rpe,Top1
GO Molecular Function	GO:0004620	phospholipase activity	130	0.305	1	1	2.77	0.361	1	39	0.0222	0.0256	1	19	69	unnamed	unnamed,unnamed,unnamed,unnamed,unnamed,unnamed,unnamed,unnamed,unnamed,unnamed,unnamed,unnamed,unnamed,unnamed,unnamed,unnamed,unnamed,unnamed,unnamed,unnamed,unnamed,unnamed,unnamed,unnamed,unnamed,unnamed,unnamed,unnamed,unnamed,unnamed,unnamed,unnamed,unnamed,unnamed,unnamed,unnamed,unnamed,unnamed,unnamed	Pld3	Htr2a,Oc90,Pla2g1b,Pla2g2e,Pla2g4f,Pla2g7,Plcb1,Plcb2,Plcb4,Plcd3,Plce1,Plcg2,Plch2,Plcl1,Plcxd3,Pld2,Pld3,Pld6,Smpd3
GO Molecular Function	GO:0005253	anion channel activity	130	0.305	1	1	2.77	0.361	1	39	0.0222	0.0256	2	16	74	unnamed	unnamed,unnamed,unnamed,unnamed,unnamed,unnamed,unnamed,unnamed,unnamed,unnamed,unnamed,unnamed,unnamed,unnamed,unnamed,unnamed,unnamed,unnamed,unnamed,unnamed,unnamed,unnamed,unnamed,unnamed,unnamed,unnamed,unnamed,unnamed,unnamed,unnamed,unnamed,unnamed,unnamed,unnamed,unnamed,unnamed,unnamed,unnamed,unnamed	Gabra2,Gabrg1	Abcc4,Ano5,Ano6,Ano7,Chrm5,Clcn5,Clcn6,Gabra1,Gabra2,Gabra3,Gabrb1,Gabrg1,Gabrg2,Glra1,Glrb,Vdac1
GO Molecular Function	GO:0030594	neurotransmitter receptor activity	133	0.318	1	1	2.63	0.38	1	41	0.0222	0.0244	1	19	64	unnamed	unnamed,unnamed,unnamed,unnamed,unnamed,unnamed,unnamed,unnamed,unnamed,unnamed,unnamed,unnamed,unnamed,unnamed,unnamed,unnamed,unnamed,unnamed,unnamed,unnamed,unnamed,unnamed,unnamed,unnamed,unnamed,unnamed,unnamed,unnamed,unnamed,unnamed,unnamed,unnamed,unnamed,unnamed,unnamed,unnamed,unnamed,unnamed,unnamed,unnamed,unnamed	Gabra2	Chrm2,Chrm5,Chrnb1,Drd2,Gabra2,Galr2,Gpr83,Grin3b,Grpr,Htr7,Mc2r,Npffr1,Npffr2,Pgr15l,Ppyr1,Prlhr,Qrfpr,Tacr2,Tspo
GO Molecular Function	GO:0030165	PDZ domain binding	134	0.325	1	1	2.57	0.389	1	42	0.0222	0.0238	1	21	82	unnamed	unnamed,unnamed,unnamed,unnamed,unnamed,unnamed,unnamed,unnamed,unnamed,unnamed,unnamed,unnamed,unnamed,unnamed,unnamed,unnamed,unnamed,unnamed,unnamed,unnamed,unnamed,unnamed,unnamed,unnamed,unnamed,unnamed,unnamed,unnamed,unnamed,unnamed,unnamed,unnamed,unnamed,unnamed,unnamed,unnamed,unnamed,unnamed,unnamed,unnamed,unnamed,unnamed	Gipc1	Adam17,Apba1,Atp2b4,Cadm1,Dlg4,Dock4,Exoc4,Frzb,Fzd1,Fzd3,Fzd8,Fzd9,Gipc1,Grasp,Grik2,Kcnj12,Lin7a,Nos1ap,Plekha1,Psen1,Synj2
GO Molecular Function	GO:0016298	lipase activity	135	0.331	1	1	2.51	0.398	1	43	0.0222	0.0233	1	22	85	unnamed	unnamed,unnamed,unnamed,unnamed,unnamed,unnamed,unnamed,unnamed,unnamed,unnamed,unnamed,unnamed,unnamed,unnamed,unnamed,unnamed,unnamed,unnamed,unnamed,unnamed,unnamed,unnamed,unnamed,unnamed,unnamed,unnamed,unnamed,unnamed,unnamed,unnamed,unnamed,unnamed,unnamed,unnamed,unnamed,unnamed,unnamed,unnamed,unnamed,unnamed,unnamed,unnamed,unnamed	Pld3	Abhd6,Daglb,Htr2a,Lpl,Oc90,Pla2g1b,Pla2g2e,Pla2g4f,Pla2g7,Plcb1,Plcb2,Plcb4,Plcd3,Plce1,Plcg2,Plch2,Plcl1,Plcxd3,Pld2,Pld3,Pld6,Smpd3
GO Molecular Function	GO:0042803	protein homodimerization activity	136	0.352	1	1	1.43	2.1	3	227	0.0667	0.0132	3	96	452	unnamed,unnamed,unnamed	unnamed,unnamed,unnamed,unnamed,unnamed,unnamed,unnamed,unnamed,unnamed,unnamed,unnamed,unnamed,unnamed,unnamed,unnamed,unnamed,unnamed,unnamed,unnamed,unnamed,unnamed,unnamed,unnamed,unnamed,unnamed,unnamed,unnamed,unnamed,unnamed,unnamed,unnamed,unnamed,unnamed,unnamed,unnamed,unnamed,unnamed,unnamed,unnamed,unnamed,unnamed,unnamed,unnamed,unnamed,unnamed,unnamed,unnamed,unnamed,unnamed,unnamed…	Gipc1,S100b,Txnrd2	Abcg1,Abcg4,Acat1,Actn1,Add2,Aldh9a1,Asgr1,Asns,Atg7,Bcl2,Bhlha15,Bmpr1a,Bnip3,Cadm1,Cda,Cep57,Chka,Foxp4,Fzd1,Fzd9,Gabpb2,Gamt,Gca,Gch1,Gipc1,Gjb1,Gopc,Gpd1l,Grik2,Grpel1,Hand1,Hes1,Heyl,Hmgcr,Homer2,Hsp90aa1,Irak1,Kcnk9,Ldb1,Lrp6,Map3k13,Map3k5,Mef2d,Msh2,Mtmr2,Mtus2,Nampt,Nkx2-5,Nod1,Nppc,Nr3c2,Oxa1l,Pdgfa,Pdk1,Plcb1,Pld6,Pon1,Pon3,Prkar2a,Prmt8,Prps1,Rab11fip3,Rab11fip4,Rabep1,Rchy1,Rpe,Rraga…
GO Molecular Function	GO:0008081	phosphoric diester hydrolase activity	137	0.356	1	1	2.3	0.435	1	47	0.0222	0.0213	1	20	81	unnamed	unnamed,unnamed,unnamed,unnamed,unnamed,unnamed,unnamed,unnamed,unnamed,unnamed,unnamed,unnamed,unnamed,unnamed,unnamed,unnamed,unnamed,unnamed,unnamed,unnamed,unnamed,unnamed,unnamed,unnamed,unnamed,unnamed,unnamed,unnamed,unnamed,unnamed,unnamed,unnamed,unnamed,unnamed,unnamed,unnamed,unnamed,unnamed,unnamed,unnamed,unnamed,unnamed,unnamed,unnamed,unnamed,unnamed,unnamed	Pld3	Enpp6,Hddc3,Htr2a,Pde4a,Pde6a,Pde7b,Pde9a,Plcb1,Plcb2,Plcb4,Plcd3,Plce1,Plcg2,Plch2,Plcl1,Plcxd3,Pld2,Pld3,Pld6,Smpd3
GO Molecular Function	GO:0005126	cytokine receptor binding	137	0.356	1	1	2.3	0.435	1	47	0.0222	0.0213	1	26	199	unnamed	unnamed,unnamed,unnamed,unnamed,unnamed,unnamed,unnamed,unnamed,unnamed,unnamed,unnamed,unnamed,unnamed,unnamed,unnamed,unnamed,unnamed,unnamed,unnamed,unnamed,unnamed,unnamed,unnamed,unnamed,unnamed,unnamed,unnamed,unnamed,unnamed,unnamed,unnamed,unnamed,unnamed,unnamed,unnamed,unnamed,unnamed,unnamed,unnamed,unnamed,unnamed,unnamed,unnamed,unnamed,unnamed,unnamed,unnamed	Il6st	Adam17,BC096441,Ccl17,Cx3cl1,Cxcl13,Eda,Erap1,Fasl,Ifna12,Ifna9,Il1f6,Il6st,Irak1,Lifr,Lyn,Ripk1,Smad2,Spred1,Spred2,Tgfb2,Tlr5,Tnfsf10,Tnfsf11,Tnfsf13b,Vegfa,Zfp369
GO Molecular Function	GO:0019838	growth factor binding	139	0.368	1	1	2.2	0.454	1	49	0.0222	0.0204	1	17	104	unnamed	unnamed,unnamed,unnamed,unnamed,unnamed,unnamed,unnamed,unnamed,unnamed,unnamed,unnamed,unnamed,unnamed,unnamed,unnamed,unnamed,unnamed,unnamed,unnamed,unnamed,unnamed,unnamed,unnamed,unnamed,unnamed,unnamed,unnamed,unnamed,unnamed,unnamed,unnamed,unnamed,unnamed,unnamed,unnamed,unnamed,unnamed,unnamed,unnamed,unnamed,unnamed,unnamed,unnamed,unnamed,unnamed,unnamed,unnamed,unnamed,unnamed	Il6st	Bmpr2,Cep57,Crim1,Ctgf,Cxcl13,Cyr61,Fgfbp3,Fgfr3,Glg1,Gm614,Htra1,Il6st,Itgav,Lifr,Nrp1,Ntrk2,Ntrk3
GO Molecular Function	GO:0009055	electron carrier activity	139	0.368	1	1	2.2	0.454	1	49	0.0222	0.0204	1	26	168	unnamed	unnamed,unnamed,unnamed,unnamed,unnamed,unnamed,unnamed,unnamed,unnamed,unnamed,unnamed,unnamed,unnamed,unnamed,unnamed,unnamed,unnamed,unnamed,unnamed,unnamed,unnamed,unnamed,unnamed,unnamed,unnamed,unnamed,unnamed,unnamed,unnamed,unnamed,unnamed,unnamed,unnamed,unnamed,unnamed,unnamed,unnamed,unnamed,unnamed,unnamed,unnamed,unnamed,unnamed,unnamed,unnamed,unnamed,unnamed,unnamed,unnamed	Pdia3	Cox7a1,Cox7a2,Cyp20a1,Cyp26b1,Cyp26c1,Cyp27b1,Cyp2d22,Cyp2d26,Cyp2j11-ps,Cyp2j6,Cyp2r1,Cyp2u1,Cyp3a57,Cyp46a1,Cyp4x1,Cyp7a1,Cyp7b1,Glrx3,Ndufa12,Ndufaf2,Ndufs1,Nqo2,Pdia3,Ptges2,Rchy1,Txnl1
GO Molecular Function	GO:0047485	protein N-terminus binding	141	0.373	1	1	2.16	0.463	1	50	0.0222	0.02	1	23	77	unnamed	unnamed,unnamed,unnamed,unnamed,unnamed,unnamed,unnamed,unnamed,unnamed,unnamed,unnamed,unnamed,unnamed,unnamed,unnamed,unnamed,unnamed,unnamed,unnamed,unnamed,unnamed,unnamed,unnamed,unnamed,unnamed,unnamed,unnamed,unnamed,unnamed,unnamed,unnamed,unnamed,unnamed,unnamed,unnamed,unnamed,unnamed,unnamed,unnamed,unnamed,unnamed,unnamed,unnamed,unnamed,unnamed,unnamed,unnamed,unnamed,unnamed,unnamed	Rnd2	Akap6,Atm,Cacna1e,Calm2,Calm3,Csnk2a1,Csnk2a2,Dab2ip,Ercc3,Exoc4,Exoc5,Mau2,Ncoa3,Pdlim5,Pex14,Pex19,Rbpj,Rnd2,Slc6a3,Smarce1,Snap25,Tgfb2,Ywhaq
GO Molecular Function	GO:0042802	identical protein binding	142	0.383	1	1	1.28	3.13	4	338	0.0889	0.0118	4	149	745	unnamed,unnamed,unnamed,unnamed	unnamed,unnamed,unnamed,unnamed,unnamed,unnamed,unnamed,unnamed,unnamed,unnamed,unnamed,unnamed,unnamed,unnamed,unnamed,unnamed,unnamed,unnamed,unnamed,unnamed,unnamed,unnamed,unnamed,unnamed,unnamed,unnamed,unnamed,unnamed,unnamed,unnamed,unnamed,unnamed,unnamed,unnamed,unnamed,unnamed,unnamed,unnamed,unnamed,unnamed,unnamed,unnamed,unnamed,unnamed,unnamed,unnamed,unnamed,unnamed,unnamed,unnamed…	Brca1,Gipc1,S100b,Txnrd2	Abcg1,Abcg4,Acat1,Actn1,Add2,Adipor1,Alad,Aldh9a1,Apoa1,App,Arhgdia,Asgr1,Asns,Atf3,Atg7,Atl3,Atm,Atxn1,Atxn10,B230120H23Rik,Bcat1,Bcl2,Bhlha15,Bmpr1a,Bnip3,Brca1,Cadm1,Cct7,Cda,Cdc42bpa,Cep57,Chka,Chordc1,Cldn11,Cmya5,Ctsc,Ddx56,Dtnbp1,E2f7,Emilin1,Foxp4,Fyn,Fzd1,Fzd9,Gabpb2,Gamt,Gca,Gch1,Gipc1,Gja3,Gjb1,Glul,Gopc,Gpd1l,Grik2,Grpel1,Hand1,Hes1,Heyl,Hmgcr,Homer2,Hook3,Hsp90aa1,Hspb1,Integrin Alph…
GO Molecular Function	GO:0051082	unfolded protein binding	143	0.391	1	1	2.04	0.491	1	53	0.0222	0.0189	1	24	94	unnamed	unnamed,unnamed,unnamed,unnamed,unnamed,unnamed,unnamed,unnamed,unnamed,unnamed,unnamed,unnamed,unnamed,unnamed,unnamed,unnamed,unnamed,unnamed,unnamed,unnamed,unnamed,unnamed,unnamed,unnamed,unnamed,unnamed,unnamed,unnamed,unnamed,unnamed,unnamed,unnamed,unnamed,unnamed,unnamed,unnamed,unnamed,unnamed,unnamed,unnamed,unnamed,unnamed,unnamed,unnamed,unnamed,unnamed,unnamed,unnamed,unnamed,unnamed…	Dnajb1	Cct2,Cct4,Cct7,Clgn,Dnaja1,Dnajb1,Dnajb12,Dnajb14,Dnajb9,Dnajc16,Dnajc18,Dnajc3,Dnajc30,Dnajc5,Grpel1,H2-Ke2,Hsp90aa1,Hspa8,Pfdn2,Sec63,Tbce,Tomm20,Trap1,Uggt1
GO Molecular Function	GO:0046872	metal ion binding	144	0.396	1	1	1.09	14.7	16	1590	0.356	0.0101	12	728	3694	unnamed,unnamed,unnamed,unnamed,unnamed,unnamed,unnamed,unnamed,unnamed,unnamed,unnamed,unnamed,unnamed,unnamed,unnamed,unnamed	unnamed,unnamed,unnamed,unnamed,unnamed,unnamed,unnamed,unnamed,unnamed,unnamed,unnamed,unnamed,unnamed,unnamed,unnamed,unnamed,unnamed,unnamed,unnamed,unnamed,unnamed,unnamed,unnamed,unnamed,unnamed,unnamed,unnamed,unnamed,unnamed,unnamed,unnamed,unnamed,unnamed,unnamed,unnamed,unnamed,unnamed,unnamed,unnamed,unnamed,unnamed,unnamed,unnamed,unnamed,unnamed,unnamed,unnamed,unnamed,unnamed,unnamed…	Brca1,Chfr,Ide,Limk1,March5,Mdm4,Neurl1b,S100b,Sncb,Tnfrsf11a,Zc3h12c,Zfp605	1500003O03Rik,2700078K21Rik,2810021J22Rik,4921515J06Rik,4930595M18Rik,4932442L08Rik,4933405O20Rik,4933426I21Rik,AK011498,Aarsd1,Aasdhppt,Ablim1,Acan,Acat1,Actn1,Acvr1b,Adam17,Adam19,Adam23,Adam33,Adam8,Adamts19,Adamts3,Adamts4,Adamtsl2,Adap1,Adar,Adat1,Adat2,Adcy5,Adcy9,Add2,Adi1,Adnp2,Ado,Adprhl2,Afg3l1,Afg3l2,Agap1,Agap2,Agap3,Agfg1,Agmat,Agtpbp1,Aifm3,Akap13,Alad,Alkbh2,Alkbh3,Alkbh5,Alkbh8,Am…
GO Molecular Function	GO:0043169	cation binding	145	0.4	1	1	1.08	14.8	16	1594	0.356	0.01	12	731	3740	unnamed,unnamed,unnamed,unnamed,unnamed,unnamed,unnamed,unnamed,unnamed,unnamed,unnamed,unnamed,unnamed,unnamed,unnamed,unnamed	unnamed,unnamed,unnamed,unnamed,unnamed,unnamed,unnamed,unnamed,unnamed,unnamed,unnamed,unnamed,unnamed,unnamed,unnamed,unnamed,unnamed,unnamed,unnamed,unnamed,unnamed,unnamed,unnamed,unnamed,unnamed,unnamed,unnamed,unnamed,unnamed,unnamed,unnamed,unnamed,unnamed,unnamed,unnamed,unnamed,unnamed,unnamed,unnamed,unnamed,unnamed,unnamed,unnamed,unnamed,unnamed,unnamed,unnamed,unnamed,unnamed,unnamed…	Brca1,Chfr,Ide,Limk1,March5,Mdm4,Neurl1b,S100b,Sncb,Tnfrsf11a,Zc3h12c,Zfp605	1500003O03Rik,2700078K21Rik,2810021J22Rik,4921515J06Rik,4930595M18Rik,4932442L08Rik,4933405O20Rik,4933426I21Rik,AK011498,Aarsd1,Aasdhppt,Ablim1,Acan,Acat1,Actn1,Acvr1b,Adam17,Adam19,Adam23,Adam33,Adam8,Adamts19,Adamts3,Adamts4,Adamtsl2,Adap1,Adar,Adat1,Adat2,Adcy5,Adcy9,Add2,Adi1,Adnp2,Ado,Adprhl2,Afg3l1,Afg3l2,Agap1,Agap2,Agap3,Agfg1,Agmat,Agtpbp1,Aifm3,Akap13,Alad,Alkbh2,Alkbh3,Alkbh5,Alkbh8,Am…
GO Molecular Function	GO:0043167	ion binding	146	0.402	1	1	1.08	14.8	16	1596	0.356	0.01	12	734	3749	unnamed,unnamed,unnamed,unnamed,unnamed,unnamed,unnamed,unnamed,unnamed,unnamed,unnamed,unnamed,unnamed,unnamed,unnamed,unnamed	unnamed,unnamed,unnamed,unnamed,unnamed,unnamed,unnamed,unnamed,unnamed,unnamed,unnamed,unnamed,unnamed,unnamed,unnamed,unnamed,unnamed,unnamed,unnamed,unnamed,unnamed,unnamed,unnamed,unnamed,unnamed,unnamed,unnamed,unnamed,unnamed,unnamed,unnamed,unnamed,unnamed,unnamed,unnamed,unnamed,unnamed,unnamed,unnamed,unnamed,unnamed,unnamed,unnamed,unnamed,unnamed,unnamed,unnamed,unnamed,unnamed,unnamed…	Brca1,Chfr,Ide,Limk1,March5,Mdm4,Neurl1b,S100b,Sncb,Tnfrsf11a,Zc3h12c,Zfp605	1500003O03Rik,2700078K21Rik,2810021J22Rik,4921515J06Rik,4930595M18Rik,4932442L08Rik,4933405O20Rik,4933426I21Rik,AK011498,Aarsd1,Aasdhppt,Ablim1,Acan,Acat1,Actn1,Acvr1b,Adam17,Adam19,Adam23,Adam33,Adam8,Adamts19,Adamts3,Adamts4,Adamtsl2,Adap1,Adar,Adat1,Adat2,Adcy5,Adcy9,Add2,Adi1,Adnp2,Ado,Adprhl2,Afg3l1,Afg3l2,Agap1,Agap2,Agap3,Agfg1,Agmat,Agtpbp1,Aifm3,Akap13,Alad,Alkbh2,Alkbh3,Alkbh5,Alkbh8,Am…
GO Molecular Function	GO:0042165	neurotransmitter binding	147	0.408	1	1	1.93	0.519	1	56	0.0222	0.0179	1	22	74	unnamed	unnamed,unnamed,unnamed,unnamed,unnamed,unnamed,unnamed,unnamed,unnamed,unnamed,unnamed,unnamed,unnamed,unnamed,unnamed,unnamed,unnamed,unnamed,unnamed,unnamed,unnamed,unnamed,unnamed,unnamed,unnamed,unnamed,unnamed,unnamed,unnamed,unnamed,unnamed,unnamed,unnamed,unnamed,unnamed,unnamed,unnamed,unnamed,unnamed,unnamed,unnamed,unnamed,unnamed,unnamed,unnamed,unnamed,unnamed,unnamed,unnamed,unnamed…	Gabra2	Chrm2,Chrm5,Chrna7,Chrnb1,Drd2,Gabra2,Galr2,Gpr83,Grin2a,Grin2b,Grin3b,Grpr,Htr7,Mc2r,Npffr1,Npffr2,Pgr15l,Ppyr1,Prlhr,Qrfpr,Tacr2,Tspo
GO Molecular Function	GO:0004984	olfactory receptor activity	148	0.413	1	1	1.89	0.528	1	57	0.0222	0.0175	2	15	1113	unnamed	unnamed,unnamed,unnamed,unnamed,unnamed,unnamed,unnamed,unnamed,unnamed,unnamed,unnamed,unnamed,unnamed,unnamed,unnamed,unnamed,unnamed,unnamed,unnamed,unnamed,unnamed,unnamed,unnamed,unnamed,unnamed,unnamed,unnamed,unnamed,unnamed,unnamed,unnamed,unnamed,unnamed,unnamed,unnamed,unnamed,unnamed,unnamed,unnamed,unnamed,unnamed,unnamed,unnamed,unnamed,unnamed,unnamed,unnamed,unnamed,unnamed,unnamed…	Olfr119,Olfr120	Olfr119,Olfr120,Olfr1274-ps,Olfr1373,Olfr1506,Olfr221,Olfr267,Olfr311,Olfr418-ps1,Olfr49,Olfr669,Olfr670,Olfr70,Olfr90,Olfr920
GO Molecular Function	GO:0019842	vitamin binding	149	0.419	1	1	1.86	0.537	1	58	0.0222	0.0172	1	24	130	unnamed	unnamed,unnamed,unnamed,unnamed,unnamed,unnamed,unnamed,unnamed,unnamed,unnamed,unnamed,unnamed,unnamed,unnamed,unnamed,unnamed,unnamed,unnamed,unnamed,unnamed,unnamed,unnamed,unnamed,unnamed,unnamed,unnamed,unnamed,unnamed,unnamed,unnamed,unnamed,unnamed,unnamed,unnamed,unnamed,unnamed,unnamed,unnamed,unnamed,unnamed,unnamed,unnamed,unnamed,unnamed,unnamed,unnamed,unnamed,unnamed,unnamed,unnamed…	Ogdhl	Accsl,Calb1,Egln1,Folr4,Gad2,Gnmt,Got1,Mmachc,Mthfs,Mtr,Mut,Ndufab1,Ogdhl,P4ha1,P4ha3,Psat1,Rlbp1,S100g,Scly,Sepsecs,Slc19a3,Slc46a1,Sptlc2,Thnsl1
GO Molecular Function	GO:0005230	extracellular ligand-gated ion channel activity	150	0.43	1	1	1.8	0.556	1	60	0.0222	0.0167	2	21	68	unnamed	unnamed,unnamed,unnamed,unnamed,unnamed,unnamed,unnamed,unnamed,unnamed,unnamed,unnamed,unnamed,unnamed,unnamed,unnamed,unnamed,unnamed,unnamed,unnamed,unnamed,unnamed,unnamed,unnamed,unnamed,unnamed,unnamed,unnamed,unnamed,unnamed,unnamed,unnamed,unnamed,unnamed,unnamed,unnamed,unnamed,unnamed,unnamed,unnamed,unnamed,unnamed,unnamed,unnamed,unnamed,unnamed,unnamed,unnamed,unnamed,unnamed,unnamed…	Gabra2,Gabrg1	Chrm5,Chrna7,Chrnb1,Gabra1,Gabra2,Gabra3,Gabrb1,Gabrg1,Gabrg2,Glra1,Glrb,Gria2,Grid1,Grik2,Grik4,Grin1,Grin2a,Grin2b,Grin2c,Grin3b,P2rx4
GO Molecular Function	GO:0004888	transmembrane signaling receptor activity	151	0.434	1	1	1.19	3.35	4	362	0.0889	0.011	6	135	2136	unnamed,unnamed,unnamed,unnamed	unnamed,unnamed,unnamed,unnamed,unnamed,unnamed,unnamed,unnamed,unnamed,unnamed,unnamed,unnamed,unnamed,unnamed,unnamed,unnamed,unnamed,unnamed,unnamed,unnamed,unnamed,unnamed,unnamed,unnamed,unnamed,unnamed,unnamed,unnamed,unnamed,unnamed,unnamed,unnamed,unnamed,unnamed,unnamed,unnamed,unnamed,unnamed,unnamed,unnamed,unnamed,unnamed,unnamed,unnamed,unnamed,unnamed,unnamed,unnamed,unnamed,unnamed…	Gabra2,Gabrg1,Il6st,Olfr119,Olfr120,Tnfrsf11a	3110082D06Rik,Acvr1b,Adra1d,Adrb1,Bmpr1a,Bmpr1b,Bmpr2,C5ar1,Cd44,Celsr2,Celsr3,Chrm2,Chrm5,Chrnb1,Crhr2,Darc,Drd2,Epha5,Fgfr3,Frzb,Fzd1,Fzd3,Fzd8,Fzd9,Gabbr1,Gabbr2,Gabra1,Gabra2,Gabra3,Gabrb1,Gabrg1,Gabrg2,Galr2,Gm614,Gpr124,Gpr125,Gpr132,Gpr135,Gpr157,Gpr158,Gpr160,Gpr165,Gpr19,Gpr27,Gpr3,Gpr37l1,Gpr62,Gpr65,Gpr75,Gpr83,Gpr85,Gria2,Grid1,Grik2,Grik4,Grin1,Grin2a,Grin2b,Grin2c,Grin3b,Grm1,Grm3,G…
GO Molecular Function	GO:0004725	protein tyrosine phosphatase activity	152	0.44	1	1	1.74	0.574	1	62	0.0222	0.0161	1	25	99	unnamed	unnamed,unnamed,unnamed,unnamed,unnamed,unnamed,unnamed,unnamed,unnamed,unnamed,unnamed,unnamed,unnamed,unnamed,unnamed,unnamed,unnamed,unnamed,unnamed,unnamed,unnamed,unnamed,unnamed,unnamed,unnamed,unnamed,unnamed,unnamed,unnamed,unnamed,unnamed,unnamed,unnamed,unnamed,unnamed,unnamed,unnamed,unnamed,unnamed,unnamed,unnamed,unnamed,unnamed,unnamed,unnamed,unnamed,unnamed,unnamed,unnamed,unnamed…	Dusp1	Dusp1,Dusp14,Dusp15,Dusp19,Dusp3,Dusp4,Dusp8,Dusp9,Epm2a,Mtm1,Mtmr2,Ptpn18,Ptpn3,Ptpn4,Ptpn9,Ptpra,Ptprb,Ptprd,Ptprg,Ptprm,Ptprn2,Ssh1,Ssh2,Tpte,Ubash3b
GO Molecular Function	GO:0008509	anion transmembrane transporter activity	153	0.451	1	1	1.69	0.593	1	64	0.0222	0.0156	2	24	132	unnamed	unnamed,unnamed,unnamed,unnamed,unnamed,unnamed,unnamed,unnamed,unnamed,unnamed,unnamed,unnamed,unnamed,unnamed,unnamed,unnamed,unnamed,unnamed,unnamed,unnamed,unnamed,unnamed,unnamed,unnamed,unnamed,unnamed,unnamed,unnamed,unnamed,unnamed,unnamed,unnamed,unnamed,unnamed,unnamed,unnamed,unnamed,unnamed,unnamed,unnamed,unnamed,unnamed,unnamed,unnamed,unnamed,unnamed,unnamed,unnamed,unnamed,unnamed…	Gabra2,Gabrg1	Abcc4,Ano5,Ano6,Ano7,Chrm5,Clcn5,Clcn6,Gabra1,Gabra2,Gabra3,Gabrb1,Gabrg1,Gabrg2,Glra1,Glrb,Pcyox1,Slc1a2,Slc20a1,Slc22a7,Slc26a3,Slc4a1,Slc4a11,Slc4a3,Vdac1
GO Molecular Function	GO:0003779	actin binding	154	0.458	1	1	1.3	1.54	2	166	0.0444	0.012	2	72	309	unnamed,unnamed	unnamed,unnamed,unnamed,unnamed,unnamed,unnamed,unnamed,unnamed,unnamed,unnamed,unnamed,unnamed,unnamed,unnamed,unnamed,unnamed,unnamed,unnamed,unnamed,unnamed,unnamed,unnamed,unnamed,unnamed,unnamed,unnamed,unnamed,unnamed,unnamed,unnamed,unnamed,unnamed,unnamed,unnamed,unnamed,unnamed,unnamed,unnamed,unnamed,unnamed,unnamed,unnamed,unnamed,unnamed,unnamed,unnamed,unnamed,unnamed,unnamed,unnamed…	Epb4.1l1,Gipc1	Ablim1,Actn1,Actr2,Actr3b,Add2,Afap1,Arpc3,Arpc5,Capza2,Cfl1,Cfl2,Cnn3,Coro1c,Coro2b,Coro6,Cyfip1,Daam1,Dag1,Dbn1,Dstn,Enah,Epb4.1,Epb4.1l1,Epb4.1l3,Fert2,Fhdc1,Fmn2,Fmnl2,Gipc1,Gmfg,Homer2,Ino80,Ipp,Itgb1,Jmy,Lasp1,Mkl1,Mkl2,Mprip,Mtap1b,Mtap1s,Mtss1,Myo16,Myo1d,Myo1h,Nexn,Ophn1,Palld,Parvb,Parvg,Pawr,Pdlim5,Pfn2,Pknox2,Pxk,Slc4a1,Sntg1,Spna2,Ssh1,Ssh2,Synpo,Tln2,Tns1,Tpm1,Vasp,Vcl,Vil1,Wasf3,Wh…
GO Molecular Function	GO:0004519	endonuclease activity	155	0.461	1	1	1.64	0.611	1	66	0.0222	0.0152	1	17	106	unnamed	unnamed,unnamed,unnamed,unnamed,unnamed,unnamed,unnamed,unnamed,unnamed,unnamed,unnamed,unnamed,unnamed,unnamed,unnamed,unnamed,unnamed,unnamed,unnamed,unnamed,unnamed,unnamed,unnamed,unnamed,unnamed,unnamed,unnamed,unnamed,unnamed,unnamed,unnamed,unnamed,unnamed,unnamed,unnamed,unnamed,unnamed,unnamed,unnamed,unnamed,unnamed,unnamed,unnamed,unnamed,unnamed,unnamed,unnamed,unnamed,unnamed,unnamed…	Zc3h12c	Drosha,Eif2c2,Elac1,Endod1,Ern1,G3bp1,Glrb,Mus81,Nit1,Pop5,Rpp14,Rpp38,Slx1b,Tatdn2,Zc3h12a,Zc3h12c,Zc3h12d
GO Molecular Function	GO:0038023	signaling receptor activity	156	0.489	1	1	1.11	3.59	4	388	0.0889	0.0103	6	149	2221	unnamed,unnamed,unnamed,unnamed	unnamed,unnamed,unnamed,unnamed,unnamed,unnamed,unnamed,unnamed,unnamed,unnamed,unnamed,unnamed,unnamed,unnamed,unnamed,unnamed,unnamed,unnamed,unnamed,unnamed,unnamed,unnamed,unnamed,unnamed,unnamed,unnamed,unnamed,unnamed,unnamed,unnamed,unnamed,unnamed,unnamed,unnamed,unnamed,unnamed,unnamed,unnamed,unnamed,unnamed,unnamed,unnamed,unnamed,unnamed,unnamed,unnamed,unnamed,unnamed,unnamed,unnamed…	Gabra2,Gabrg1,Il6st,Olfr119,Olfr120,Tnfrsf11a	3110082D06Rik,Acvr1b,Adra1d,Adrb1,Ahr,Ar,Bmpr1a,Bmpr1b,Bmpr2,C5ar1,Cd44,Celsr2,Celsr3,Chrm2,Chrm5,Chrnb1,Crhr2,Darc,Drd2,Epha5,Esrrb,Fgfr3,Frzb,Fzd1,Fzd3,Fzd8,Fzd9,Gabbr1,Gabbr2,Gabra1,Gabra2,Gabra3,Gabrb1,Gabrg1,Gabrg2,Galr2,Gfra4,Gm614,Gpr124,Gpr125,Gpr132,Gpr135,Gpr157,Gpr158,Gpr160,Gpr165,Gpr19,Gpr27,Gpr3,Gpr37l1,Gpr62,Gpr65,Gpr75,Gpr83,Gpr85,Gria2,Grid1,Grik2,Grik4,Grin1,Grin2a,Grin2b,Grin2c…
GO Molecular Function	GO:0031625	ubiquitin protein ligase binding	157	0.491	1	1	1.5	0.667	1	72	0.0222	0.0139	1	35	99	unnamed	unnamed,unnamed,unnamed,unnamed,unnamed,unnamed,unnamed,unnamed,unnamed,unnamed,unnamed,unnamed,unnamed,unnamed,unnamed,unnamed,unnamed,unnamed,unnamed,unnamed,unnamed,unnamed,unnamed,unnamed,unnamed,unnamed,unnamed,unnamed,unnamed,unnamed,unnamed,unnamed,unnamed,unnamed,unnamed,unnamed,unnamed,unnamed,unnamed,unnamed,unnamed,unnamed,unnamed,unnamed,unnamed,unnamed,unnamed,unnamed,unnamed,unnamed…	Brca1	2700078E11Rik,Arih1,Arrb1,Atp6v0c,Axin2,Bag5,Bcl10,Bcl2,Brca1,Cul1,Cul3,Cul4b,Cul5,Cul7,Dnm1l,Egr2,Grik2,Lyn,Nedd8,Nfkbia,Pax6,Pias2,Pias4,Pink1,Polr2a,Prkar2a,Rad18,Rnf20,Smad2,Snx9,Trib2,Ube2a,Ube2b,Ube2k,Wfs1
GO Molecular Function	GO:0004872	receptor activity	158	0.514	1	1	1.05	5.7	6	616	0.133	0.00974	8	248	2782	unnamed,unnamed,unnamed,unnamed,unnamed,unnamed	unnamed,unnamed,unnamed,unnamed,unnamed,unnamed,unnamed,unnamed,unnamed,unnamed,unnamed,unnamed,unnamed,unnamed,unnamed,unnamed,unnamed,unnamed,unnamed,unnamed,unnamed,unnamed,unnamed,unnamed,unnamed,unnamed,unnamed,unnamed,unnamed,unnamed,unnamed,unnamed,unnamed,unnamed,unnamed,unnamed,unnamed,unnamed,unnamed,unnamed,unnamed,unnamed,unnamed,unnamed,unnamed,unnamed,unnamed,unnamed,unnamed,unnamed…	Cd7,Gabra2,Gabrg1,Il31ra,Il6st,Olfr119,Olfr120,Tnfrsf11a	3110082D06Rik,Acvr1b,Adipor1,Adra1d,Adrb1,Adrbk1,Ahr,Ar,Asgr1,Atp9b,Atrn,Bmpr1a,Bmpr1b,Bmpr2,Bzrap1,C5ar1,Cd209c,Cd302,Cd44,Cd7,Cd80,Cdhr1,Celsr2,Celsr3,Chrm2,Chrm5,Chrna7,Chrnb1,Crhr2,Darc,Drd2,Epha5,Eps15,Esrrb,Fgfr3,Folr4,Frzb,Fzd1,Fzd3,Fzd8,Fzd9,Gab2,Gabbr1,Gabbr2,Gabra1,Gabra2,Gabra3,Gabrb1,Gabrg1,Gabrg2,Galr2,Gfra1,Gfra4,Git2,Glra1,Glrb,Gm614,Gpr107,Gpr124,Gpr125,Gpr132,Gpr135,Gpr137c,Gpr15…
GO Molecular Function	GO:0005085	guanyl-nucleotide exchange factor activity	159	0.532	1	1	1.33	0.75	1	81	0.0222	0.0123	1	33	163	unnamed	unnamed,unnamed,unnamed,unnamed,unnamed,unnamed,unnamed,unnamed,unnamed,unnamed,unnamed,unnamed,unnamed,unnamed,unnamed,unnamed,unnamed,unnamed,unnamed,unnamed,unnamed,unnamed,unnamed,unnamed,unnamed,unnamed,unnamed,unnamed,unnamed,unnamed,unnamed,unnamed,unnamed,unnamed,unnamed,unnamed,unnamed,unnamed,unnamed,unnamed,unnamed,unnamed,unnamed,unnamed,unnamed,unnamed,unnamed,unnamed,unnamed,unnamed…	Mon2	4930449I24Rik,4930596D02Rik,Akap13,Arhgef11,Arhgef2,Arhgef26,Bcr,Cyth1,Cyth2,Cyth4,D10Bwg1379e,Dock4,Dock7,Farp1,Gapvd1,Iqsec1,Itsn2,Mon2,Plce1,Psd2,Psd3,Rabif,Rapgef4,Rapgef5,Rasgef1b,Rasgef1c,Rasgrf2,Rgl1,Ric8b,Spata13,Tbc1d10a,Wbscr16,mKIAA1112
GO Molecular Function	GO:0003700	sequence-specific DNA binding transcription factor activity	160	0.548	1	1	1.06	2.84	3	307	0.0667	0.00977	3	137	828	unnamed,unnamed,unnamed	unnamed,unnamed,unnamed,unnamed,unnamed,unnamed,unnamed,unnamed,unnamed,unnamed,unnamed,unnamed,unnamed,unnamed,unnamed,unnamed,unnamed,unnamed,unnamed,unnamed,unnamed,unnamed,unnamed,unnamed,unnamed,unnamed,unnamed,unnamed,unnamed,unnamed,unnamed,unnamed,unnamed,unnamed,unnamed,unnamed,unnamed,unnamed,unnamed,unnamed,unnamed,unnamed,unnamed,unnamed,unnamed,unnamed,unnamed,unnamed,unnamed,unnamed…	Dach1,Mafg,Scand1	A930001N09Rik,AK028549,Adnp2,Aff3,Ahr,Ar,Arap1,Arnt2,Atf1,Atf2,Atf3,Bach2,Barhl1,Carf,Clock,Crebbp,Crebl2,Csrnp3,Ctnnb1,Dach1,E2f1,E2f3,E2f7,Egr2,Elf2,Elf3,Epas1,Esrrb,Esx1,Etv1,Etv4,Etv5,Fev,Foxd1,Foxe3,Foxf1a,Foxo4,Foxp4,Foxs1,Gabpa,Gatad2b,Hand1,Hes1,Hes5,Heyl,Hmbox1,Homez,Hoxa3,Hoxa7,Hoxc10,Hoxc6,Hoxc8,Hoxc9,Hoxd10,Hoxd11,Hoxd3,Hoxd8,Hsfy2,Irf1,Junb,Klf11,Klf12,Klf4,Klf5,Klf7,L3mbtl4,Lass4,La…
GO Molecular Function	GO:0001071	nucleic acid binding transcription factor activity	160	0.548	1	1	1.06	2.84	3	307	0.0667	0.00977	3	137	830	unnamed,unnamed,unnamed	unnamed,unnamed,unnamed,unnamed,unnamed,unnamed,unnamed,unnamed,unnamed,unnamed,unnamed,unnamed,unnamed,unnamed,unnamed,unnamed,unnamed,unnamed,unnamed,unnamed,unnamed,unnamed,unnamed,unnamed,unnamed,unnamed,unnamed,unnamed,unnamed,unnamed,unnamed,unnamed,unnamed,unnamed,unnamed,unnamed,unnamed,unnamed,unnamed,unnamed,unnamed,unnamed,unnamed,unnamed,unnamed,unnamed,unnamed,unnamed,unnamed,unnamed…	Dach1,Mafg,Scand1	A930001N09Rik,AK028549,Adnp2,Aff3,Ahr,Ar,Arap1,Arnt2,Atf1,Atf2,Atf3,Bach2,Barhl1,Carf,Clock,Crebbp,Crebl2,Csrnp3,Ctnnb1,Dach1,E2f1,E2f3,E2f7,Egr2,Elf2,Elf3,Epas1,Esrrb,Esx1,Etv1,Etv4,Etv5,Fev,Foxd1,Foxe3,Foxf1a,Foxo4,Foxp4,Foxs1,Gabpa,Gatad2b,Hand1,Hes1,Hes5,Heyl,Hmbox1,Homez,Hoxa3,Hoxa7,Hoxc10,Hoxc6,Hoxc8,Hoxc9,Hoxd10,Hoxd11,Hoxd3,Hoxd8,Hsfy2,Irf1,Junb,Klf11,Klf12,Klf4,Klf5,Klf7,L3mbtl4,Lass4,La…
GO Molecular Function	GO:0003676	nucleic acid binding	162	0.558	1	1	1	11	11	1188	0.244	0.00926	8	524	3101	unnamed,unnamed,unnamed,unnamed,unnamed,unnamed,unnamed,unnamed,unnamed,unnamed,unnamed	unnamed,unnamed,unnamed,unnamed,unnamed,unnamed,unnamed,unnamed,unnamed,unnamed,unnamed,unnamed,unnamed,unnamed,unnamed,unnamed,unnamed,unnamed,unnamed,unnamed,unnamed,unnamed,unnamed,unnamed,unnamed,unnamed,unnamed,unnamed,unnamed,unnamed,unnamed,unnamed,unnamed,unnamed,unnamed,unnamed,unnamed,unnamed,unnamed,unnamed,unnamed,unnamed,unnamed,unnamed,unnamed,unnamed,unnamed,unnamed,unnamed,unnamed…	Brca1,Dach1,Dis3l,Eif4h,Mafg,Thoc3,Zc3h12c,Zfp605	1500010J02Rik,2310003H01Rik,2610101N10Rik,2810021J22Rik,4921513D23Rik,4921515J06Rik,4930595M18Rik,4932442L08Rik,4933426I21Rik,A1cf,A930001N09Rik,AK011498,AK028549,Aarsd1,Adad2,Adar,Adat1,Adnp2,Aff2,Aff3,Agfg1,Ahnak2,Ahr,Alkbh8,Ankhd1,App,Ar,Arap1,Arid2,Arid5b,Arnt2,Arrb1,Atf1,Atf2,Atf3,Atm,Atoh1,Atrx,Atxn1,Bach2,Bahd1,Barhl1,Basp1,Bcl2,Bhlha15,Bhlhe23,Bhlhe41,Brca1,Brd4,Btaf1,Btbd11,C130039O16Rik…
GO Molecular Function	GO:0035091	phosphatidylinositol binding	163	0.558	1	1	1.24	0.806	1	87	0.0222	0.0115	1	35	122	unnamed	unnamed,unnamed,unnamed,unnamed,unnamed,unnamed,unnamed,unnamed,unnamed,unnamed,unnamed,unnamed,unnamed,unnamed,unnamed,unnamed,unnamed,unnamed,unnamed,unnamed,unnamed,unnamed,unnamed,unnamed,unnamed,unnamed,unnamed,unnamed,unnamed,unnamed,unnamed,unnamed,unnamed,unnamed,unnamed,unnamed,unnamed,unnamed,unnamed,unnamed,unnamed,unnamed,unnamed,unnamed,unnamed,unnamed,unnamed,unnamed,unnamed,unnamed…	Pik3c2b	Apba1,Arap1,Arap3,Arhgap32,Col4a3bp,Epb4.1,Gab2,Hs1bp3,Kif16b,Lancl2,Mark1,Mtm1,Pard3,Picalm,Pik3c2b,Plcb1,Pld2,Plekha1,Pxk,Rab35,Sestd1,Sgk1,Sh3pxd2a,Snx10,Snx13,Snx16,Snx19,Snx29,Snx6,Snx9,Vil1,Wdfy1,Wdfy3,Wipi2,Zcchc14
GO Molecular Function	GO:0008092	cytoskeletal protein binding	164	0.561	1	1	1.04	2.9	3	313	0.0667	0.00958	3	135	507	unnamed,unnamed,unnamed	unnamed,unnamed,unnamed,unnamed,unnamed,unnamed,unnamed,unnamed,unnamed,unnamed,unnamed,unnamed,unnamed,unnamed,unnamed,unnamed,unnamed,unnamed,unnamed,unnamed,unnamed,unnamed,unnamed,unnamed,unnamed,unnamed,unnamed,unnamed,unnamed,unnamed,unnamed,unnamed,unnamed,unnamed,unnamed,unnamed,unnamed,unnamed,unnamed,unnamed,unnamed,unnamed,unnamed,unnamed,unnamed,unnamed,unnamed,unnamed,unnamed,unnamed…	Epb4.1l1,Gipc1,S100b	1110017D15Rik,Ablim1,Actn1,Actr2,Actr3b,Add2,Afap1,Agtpbp1,Apc,Arhgap10,Arhgap42,Arhgef2,Arl3,Arpc3,Arpc5,Asap1,Bbs4,Bcl2l11,Bicd1,Brsk1,Calm2,Calm3,Capn1,Capn6,Capza2,Ccdc64,Cdk5r1,Cdk5r2,Cdk5rap2,Cep57,Cfl1,Cfl2,Clip1,Cnn3,Coro1c,Coro2b,Coro6,Cyfip1,Daam1,Dag1,Dbn1,Dstn,Dync1i1,Enah,Epb4.1,Epb4.1l1,Epb4.1l3,Epb4.1l4a,Epb4.1l4b,Epb4.1l5,Farp1,Fert2,Fez1,Fhdc1,Fmn2,Fmnl2,Fyn,Gipc1,Gmfg,Gphn,Homer…
GO Molecular Function	GO:0015276	ligand-gated ion channel activity	165	0.57	1	1	1.2	0.833	1	90	0.0222	0.0111	2	35	116	unnamed	unnamed,unnamed,unnamed,unnamed,unnamed,unnamed,unnamed,unnamed,unnamed,unnamed,unnamed,unnamed,unnamed,unnamed,unnamed,unnamed,unnamed,unnamed,unnamed,unnamed,unnamed,unnamed,unnamed,unnamed,unnamed,unnamed,unnamed,unnamed,unnamed,unnamed,unnamed,unnamed,unnamed,unnamed,unnamed,unnamed,unnamed,unnamed,unnamed,unnamed,unnamed,unnamed,unnamed,unnamed,unnamed,unnamed,unnamed,unnamed,unnamed,unnamed…	Gabra2,Gabrg1	Chrm5,Chrna7,Chrnb1,Gabra1,Gabra2,Gabra3,Gabrb1,Gabrg1,Gabrg2,Glra1,Glrb,Gria2,Grid1,Grik2,Grik4,Grin1,Grin2a,Grin2b,Grin2c,Grin3b,Hcn4,Jph2,Kcnh7,Kcnj11,Kcnj12,Kcnj13,Kcnj16,Kcnj2,Kcnj3,Kcnj5,Kcnj6,P2rx4,Ryr2,Ryr3,Trpc1
GO Molecular Function	GO:0032403	protein complex binding	166	0.582	1	1	1.16	0.861	1	93	0.0222	0.0108	1	42	236	unnamed	unnamed,unnamed,unnamed,unnamed,unnamed,unnamed,unnamed,unnamed,unnamed,unnamed,unnamed,unnamed,unnamed,unnamed,unnamed,unnamed,unnamed,unnamed,unnamed,unnamed,unnamed,unnamed,unnamed,unnamed,unnamed,unnamed,unnamed,unnamed,unnamed,unnamed,unnamed,unnamed,unnamed,unnamed,unnamed,unnamed,unnamed,unnamed,unnamed,unnamed,unnamed,unnamed,unnamed,unnamed,unnamed,unnamed,unnamed,unnamed,unnamed,unnamed…	Gfap	Acvr1b,Adam17,Adam8,Apba1,Atf1,Atm,Atp5d,Cdk7,Cps1,Cyr61,Exoc4,Frs2,Fyn,Gfap,Gfra1,Gna12,Gna14,Gnao1,Gnaq,Hcls1,Irs2,Irs3,Itgb1,Itgb6,Lamb1,Lyn,Mapk8ip2,Mlh1,Msh2,Mtap1b,Mtm1,Npnt,Pdk1,Plcb2,Rapgef4,Slc6a3,Strn,Tln2,Tnr,Tubb5,Uchl5,Vcam1
GO Molecular Function	GO:0003713	transcription coactivator activity	167	0.602	1	1	1.1	0.907	1	98	0.0222	0.0102	1	34	155	unnamed	unnamed,unnamed,unnamed,unnamed,unnamed,unnamed,unnamed,unnamed,unnamed,unnamed,unnamed,unnamed,unnamed,unnamed,unnamed,unnamed,unnamed,unnamed,unnamed,unnamed,unnamed,unnamed,unnamed,unnamed,unnamed,unnamed,unnamed,unnamed,unnamed,unnamed,unnamed,unnamed,unnamed,unnamed,unnamed,unnamed,unnamed,unnamed,unnamed,unnamed,unnamed,unnamed,unnamed,unnamed,unnamed,unnamed,unnamed,unnamed,unnamed,unnamed…	Scand1	Arid5b,Arl2bp,Bcl10,Calcoco1,Cops5,Crebbp,Ctnnb1,Dyrk1b,Elf3,Esrrb,Hand1,Jmy,Kat2a,Kat5,Lpin1,Lpin2,Maml1,Med14,Meg3,Mkl1,Mkl2,Mll5,Ncoa1,Ncoa3,Nrip1,Ppargc1a,Ppargc1b,Rnf20,Sall1,Scand1,Sox11,Ube3a,Usp22,Wdr77
GO Molecular Function	GO:0016740	transferase activity	168	0.604	1	1	0.967	9.31	9	1005	0.2	0.00896	6	423	1797	unnamed,unnamed,unnamed,unnamed,unnamed,unnamed,unnamed,unnamed,unnamed	unnamed,unnamed,unnamed,unnamed,unnamed,unnamed,unnamed,unnamed,unnamed,unnamed,unnamed,unnamed,unnamed,unnamed,unnamed,unnamed,unnamed,unnamed,unnamed,unnamed,unnamed,unnamed,unnamed,unnamed,unnamed,unnamed,unnamed,unnamed,unnamed,unnamed,unnamed,unnamed,unnamed,unnamed,unnamed,unnamed,unnamed,unnamed,unnamed,unnamed,unnamed,unnamed,unnamed,unnamed,unnamed,unnamed,unnamed,unnamed,unnamed,unnamed…	1110032A04Rik,Gak,Hipk4,Limk1,Pik3c2b,Ppip5k2	1110002B05Rik,1110032A04Rik,4921515J06Rik,4931440L10Rik,5330437I02Rik,A130022J15Rik,AI480653,Aasdhppt,Abhd5,Acat1,Accsl,Acvr1b,Adck3,Adrbk1,Agk,Agpat3,Agpat5,Agphd1,Agps,Ak8,Akap13,Akap4,Akap6,Akt2,Akt3,Alg10b,Alg11,Alg3,Alkbh8,Alpk2,Ankk1,Atm,B230120H23Rik,B3galnt1,B3galt2,B3gnt3,B3gnt7,B4galnt4,B4galt3,B4galt6,B4galt7,Baz1b,Bcat1,Bcr,Bmpr1a,Bmpr1b,Bmpr2,Braf,Brsk1,C1galt1,C77370,Cab39,Camk2d,Ca…
GO Molecular Function	GO:0016747	transferase activity, transferring acyl groups other than amino-acyl groups	169	0.62	1	1	1.05	0.954	1	103	0.0222	0.00971	1	39	170	unnamed	unnamed,unnamed,unnamed,unnamed,unnamed,unnamed,unnamed,unnamed,unnamed,unnamed,unnamed,unnamed,unnamed,unnamed,unnamed,unnamed,unnamed,unnamed,unnamed,unnamed,unnamed,unnamed,unnamed,unnamed,unnamed,unnamed,unnamed,unnamed,unnamed,unnamed,unnamed,unnamed,unnamed,unnamed,unnamed,unnamed,unnamed,unnamed,unnamed,unnamed,unnamed,unnamed,unnamed,unnamed,unnamed,unnamed,unnamed,unnamed,unnamed,unnamed…	1110032A04Rik	1110002B05Rik,1110032A04Rik,5330437I02Rik,Abhd5,Acat1,Agpat3,Agpat5,Clock,Cpt1c,Crebbp,Elovl4,Elovl5,Elovl7,Elp4,Gm4952,Gtf3c4,Hgsnat,Kat2a,Kat5,Lass4,Lass6,Lpcat1,Naa15,Naa30,Nat10,Nat3,Nat8l,Ncoa1,Ncoa3,Nmt1,Nmt2,Slc27a3,Smarce1,Soat1,Sptlc2,Usp22,Zdhhc15,Zdhhc17,Zdhhc2
GO Molecular Function	GO:0005102	receptor binding	170	0.63	1	1	0.937	4.27	4	461	0.0889	0.00868	4	200	993	unnamed,unnamed,unnamed,unnamed	unnamed,unnamed,unnamed,unnamed,unnamed,unnamed,unnamed,unnamed,unnamed,unnamed,unnamed,unnamed,unnamed,unnamed,unnamed,unnamed,unnamed,unnamed,unnamed,unnamed,unnamed,unnamed,unnamed,unnamed,unnamed,unnamed,unnamed,unnamed,unnamed,unnamed,unnamed,unnamed,unnamed,unnamed,unnamed,unnamed,unnamed,unnamed,unnamed,unnamed,unnamed,unnamed,unnamed,unnamed,unnamed,unnamed,unnamed,unnamed,unnamed,unnamed…	Gfap,Gipc1,Il6st,S100b	Adam17,Adam8,Adrb1,Adrbk1,Akap6,Ankrd13c,Anks1,Apoa1,App,Ar,Arnt2,Arpp19,Arrb1,Atp2a2,BC096441,Baz1b,Bicd1,Bmp7,Bzrap1,Cadm1,Calca,Calcb,Cbl,Ccl17,Cd276,Chn1,Cmtm3,Cmtm4,Cmtm8,Cnpy3,Cntnap5a,Cntnap5b,Crebbp,Crh,Crhr2,Crk,Crtam,Ctgf,Cthrc1,Ctnnb1,Ctnnd1,Cx3cl1,Cxcl13,Cyr61,Dlg4,Dnaja1,Dock4,Drd2,Dyx1c1,Eda,Efna1,Efna3,Efna5,Efnb2,Erap1,Fasl,Fcnb,Fert2,Fgf11,Fgf12,Fgf14,Fgf18,Fgf9,Frs2,Fshb,Fyn,Fzd…
GO Molecular Function	GO:0030695	GTPase regulator activity	171	0.662	1	1	0.896	2.23	2	241	0.0444	0.0083	2	104	384	unnamed,unnamed	unnamed,unnamed,unnamed,unnamed,unnamed,unnamed,unnamed,unnamed,unnamed,unnamed,unnamed,unnamed,unnamed,unnamed,unnamed,unnamed,unnamed,unnamed,unnamed,unnamed,unnamed,unnamed,unnamed,unnamed,unnamed,unnamed,unnamed,unnamed,unnamed,unnamed,unnamed,unnamed,unnamed,unnamed,unnamed,unnamed,unnamed,unnamed,unnamed,unnamed,unnamed,unnamed,unnamed,unnamed,unnamed,unnamed,unnamed,unnamed,unnamed,unnamed…	Gipc1,Mon2	4930449I24Rik,4930596D02Rik,Adap1,Agap1,Agap2,Agap3,Agfg1,Akap13,Arap1,Arap3,Arfgap3,Arhgap10,Arhgap12,Arhgap21,Arhgap22,Arhgap28,Arhgap32,Arhgap36,Arhgap42,Arhgap5,Arhgdia,Arhgef11,Arhgef2,Arhgef26,Arrb1,Asap1,Asap2,Axin2,Bcr,Cdc42bpa,Chn1,Cit,Cyth1,Cyth2,Cyth4,D10Bwg1379e,Dab2ip,Depdc1b,Dgki,Dock4,Dock7,Farp1,Gapvd1,Gdi1,Gipc1,Git2,Gnaq,Gopc,Grlf1,Grtp1,Iqgap2,Iqsec1,Itsn2,Map4k2,Mon2,Ophn1,Plc…
GO Molecular Function	GO:0005543	phospholipid binding	172	0.68	1	1	0.893	1.12	1	121	0.0222	0.00826	1	50	194	unnamed	unnamed,unnamed,unnamed,unnamed,unnamed,unnamed,unnamed,unnamed,unnamed,unnamed,unnamed,unnamed,unnamed,unnamed,unnamed,unnamed,unnamed,unnamed,unnamed,unnamed,unnamed,unnamed,unnamed,unnamed,unnamed,unnamed,unnamed,unnamed,unnamed,unnamed,unnamed,unnamed,unnamed,unnamed,unnamed,unnamed,unnamed,unnamed,unnamed,unnamed,unnamed,unnamed,unnamed,unnamed,unnamed,unnamed,unnamed,unnamed,unnamed,unnamed…	Pik3c2b	Anxa6,Apba1,Apoa1,Arap1,Arap3,Arhgap32,Bdh1,Col4a3bp,Cpne6,Cps1,Epb4.1,Gab2,Hs1bp3,Kif16b,Lancl2,Mark1,Mtm1,Pard3,Pclo,Picalm,Pik3c2b,Pitpna,Pla2g7,Plcb1,Plcb2,Pld2,Plekha1,Pon1,Pxk,Rab35,Sestd1,Sgk1,Sh3pxd2a,Snx10,Snx13,Snx16,Snx19,Snx29,Snx6,Snx9,Syt11,Syt14,Syt16,Syt2,Syt3,Vil1,Wdfy1,Wdfy3,Wipi2,Zcchc14
GO Molecular Function	GO:0060589	nucleoside-triphosphatase regulator activity	173	0.686	1	1	0.857	2.33	2	252	0.0444	0.00794	2	108	396	unnamed,unnamed	unnamed,unnamed,unnamed,unnamed,unnamed,unnamed,unnamed,unnamed,unnamed,unnamed,unnamed,unnamed,unnamed,unnamed,unnamed,unnamed,unnamed,unnamed,unnamed,unnamed,unnamed,unnamed,unnamed,unnamed,unnamed,unnamed,unnamed,unnamed,unnamed,unnamed,unnamed,unnamed,unnamed,unnamed,unnamed,unnamed,unnamed,unnamed,unnamed,unnamed,unnamed,unnamed,unnamed,unnamed,unnamed,unnamed,unnamed,unnamed,unnamed,unnamed…	Gipc1,Mon2	4930449I24Rik,4930596D02Rik,Adap1,Agap1,Agap2,Agap3,Agfg1,Ahsa1,Ahsa2,Akap13,Arap1,Arap3,Arfgap3,Arhgap10,Arhgap12,Arhgap21,Arhgap22,Arhgap28,Arhgap32,Arhgap36,Arhgap42,Arhgap5,Arhgdia,Arhgef11,Arhgef2,Arhgef26,Arrb1,Asap1,Asap2,Axin2,Bcr,Cdc42bpa,Chn1,Cit,Cyth1,Cyth2,Cyth4,D10Bwg1379e,Dab2ip,Depdc1b,Dgki,Dock4,Dock7,Farp1,Gapvd1,Gdi1,Gipc1,Git2,Gnaq,Gopc,Grlf1,Grpel1,Grtp1,Iqgap2,Iqsec1,Itsn2,Ma…
GO Molecular Function	GO:0016746	transferase activity, transferring acyl groups	174	0.686	1	1	0.878	1.14	1	123	0.0222	0.00813	1	49	222	unnamed	unnamed,unnamed,unnamed,unnamed,unnamed,unnamed,unnamed,unnamed,unnamed,unnamed,unnamed,unnamed,unnamed,unnamed,unnamed,unnamed,unnamed,unnamed,unnamed,unnamed,unnamed,unnamed,unnamed,unnamed,unnamed,unnamed,unnamed,unnamed,unnamed,unnamed,unnamed,unnamed,unnamed,unnamed,unnamed,unnamed,unnamed,unnamed,unnamed,unnamed,unnamed,unnamed,unnamed,unnamed,unnamed,unnamed,unnamed,unnamed,unnamed,unnamed…	1110032A04Rik	1110002B05Rik,1110032A04Rik,5330437I02Rik,Abhd5,Acat1,Agpat3,Agpat5,Clock,Cpt1c,Crebbp,Elovl4,Elovl5,Elovl7,Elp4,Ggt5,Gm4952,Gtf3c4,Hgsnat,Kat2a,Kat5,Lass4,Lass6,Lpcat1,Lpcat4,Lpgat1,Naa15,Naa30,Nat10,Nat3,Nat8l,Ncoa1,Ncoa3,Nmt1,Nmt2,Qpctl,Slc27a3,Smarce1,Soat1,Sptlc2,Usp22,Zdhhc14,Zdhhc15,Zdhhc17,Zdhhc2,Zdhhc21,Zdhhc22,Zdhhc24,Zdhhc8,Zdhhc9
GO Molecular Function	GO:0019904	protein domain specific binding	175	0.705	1	1	0.828	2.42	2	261	0.0444	0.00766	2	124	493	unnamed,unnamed	unnamed,unnamed,unnamed,unnamed,unnamed,unnamed,unnamed,unnamed,unnamed,unnamed,unnamed,unnamed,unnamed,unnamed,unnamed,unnamed,unnamed,unnamed,unnamed,unnamed,unnamed,unnamed,unnamed,unnamed,unnamed,unnamed,unnamed,unnamed,unnamed,unnamed,unnamed,unnamed,unnamed,unnamed,unnamed,unnamed,unnamed,unnamed,unnamed,unnamed,unnamed,unnamed,unnamed,unnamed,unnamed,unnamed,unnamed,unnamed,unnamed,unnamed…	Gipc1,Nefl	AK028549,Actn1,Adam17,Adam19,Afap1,Afap1l2,Apba1,App,Ar,Arhgap10,Arhgap42,Arhgap5,Asap1,Atp2b4,Atrx,Axin2,Basp1,Bcl2,Cabyr,Cadm1,Calcoco1,Calm2,Calm3,Cbl,Chmp2a,Cit,Crk,Ctnnd1,Dlg4,Dlgap1,Dlgap2,Dlgap4,Dock4,Dynll1,Elmo1,Enah,Epb4.1l5,Eps15,Exoc4,Fam189b,Frzb,Fzd1,Fzd3,Fzd8,Fzd9,Gipc1,Grasp,Grik2,Hcls1,Heyl,Homer2,Homer3,Hoxa3,Hsp90aa1,Itgb1,Kcnj12,Kpnb1,Lancl1,Lax1,Lbr,Ldb1,Lin7a,Lin7b,Lrrfip2,L…
GO Molecular Function	GO:0005096	GTPase activator activity	176	0.743	1	1	0.75	1.33	1	144	0.0222	0.00694	1	67	215	unnamed	unnamed,unnamed,unnamed,unnamed,unnamed,unnamed,unnamed,unnamed,unnamed,unnamed,unnamed,unnamed,unnamed,unnamed,unnamed,unnamed,unnamed,unnamed,unnamed,unnamed,unnamed,unnamed,unnamed,unnamed,unnamed,unnamed,unnamed,unnamed,unnamed,unnamed,unnamed,unnamed,unnamed,unnamed,unnamed,unnamed,unnamed,unnamed,unnamed,unnamed,unnamed,unnamed,unnamed,unnamed,unnamed,unnamed,unnamed,unnamed,unnamed,unnamed…	Gipc1	Adap1,Agap1,Agap2,Agap3,Agfg1,Arap1,Arap3,Arfgap3,Arhgap10,Arhgap12,Arhgap21,Arhgap22,Arhgap28,Arhgap32,Arhgap36,Arhgap42,Arhgap5,Arhgdia,Arrb1,Asap1,Asap2,Axin2,Bcr,Chn1,Dab2ip,Depdc1b,Dock4,Gapvd1,Gdi1,Gipc1,Git2,Gnaq,Grlf1,Grtp1,Iqgap2,Ophn1,Plcb1,Rab3gap2,Rabep1,Ralgapa2,Rasa1,Rasa2,Rgs17,Rgs2,Rgs4,Rgs5,Rgs6,Rgs7,Rin2,Sgsm3,Sipa1l1,Srgap1,Tbc1d10a,Tbc1d10b,Tbc1d15,Tbc1d19,Tbc1d2,Tbc1d20,Tbc1d…
GO Molecular Function	GO:0044212	transcription regulatory region DNA binding	177	0.746	1	1	0.745	1.34	1	145	0.0222	0.0069	1	56	270	unnamed	unnamed,unnamed,unnamed,unnamed,unnamed,unnamed,unnamed,unnamed,unnamed,unnamed,unnamed,unnamed,unnamed,unnamed,unnamed,unnamed,unnamed,unnamed,unnamed,unnamed,unnamed,unnamed,unnamed,unnamed,unnamed,unnamed,unnamed,unnamed,unnamed,unnamed,unnamed,unnamed,unnamed,unnamed,unnamed,unnamed,unnamed,unnamed,unnamed,unnamed,unnamed,unnamed,unnamed,unnamed,unnamed,unnamed,unnamed,unnamed,unnamed,unnamed…	Brca1	Ahr,Ar,Arap1,Arid5b,Arrb1,Basp1,Brca1,Calcoco1,Ccnt1,Cdk5rap2,Ctnnb1,Egr2,Esrrb,Esx1,Etv5,Foxf1a,Gabpa,Gabpb2,Hand1,Hdac4,Hes1,Heyl,Hoxc8,Klf11,Klf4,Ldb1,Lmo4,Mef2a,Mef2d,Nkx2-5,Nr5a2,Pax2,Pax6,Pax8,Pura,Purb,Rcor1,Sall1,Six1,Smad4,Sox11,Sox3,Sox5,Stat1,Tbl1x,Tcf12,Tcf20,Tcf4,Tcf7,Tcf7l1,Tcf7l2,Tcfap2c,Wnt11,Yy1,Zfp217,Zfp281
GO Molecular Function	GO:0000975	regulatory region DNA binding	178	0.748	1	1	0.74	1.35	1	146	0.0222	0.00685	1	57	279	unnamed	unnamed,unnamed,unnamed,unnamed,unnamed,unnamed,unnamed,unnamed,unnamed,unnamed,unnamed,unnamed,unnamed,unnamed,unnamed,unnamed,unnamed,unnamed,unnamed,unnamed,unnamed,unnamed,unnamed,unnamed,unnamed,unnamed,unnamed,unnamed,unnamed,unnamed,unnamed,unnamed,unnamed,unnamed,unnamed,unnamed,unnamed,unnamed,unnamed,unnamed,unnamed,unnamed,unnamed,unnamed,unnamed,unnamed,unnamed,unnamed,unnamed,unnamed…	Brca1	Ahr,Ar,Arap1,Arid5b,Arrb1,Basp1,Brca1,Calcoco1,Ccnt1,Cdk5rap2,Ctnnb1,Egr2,Esrrb,Esx1,Etv5,Foxf1a,Gabpa,Gabpb2,Hand1,Hdac4,Hes1,Heyl,Hoxc8,Irf1,Klf11,Klf4,Ldb1,Lmo4,Mef2a,Mef2d,Nkx2-5,Nr5a2,Pax2,Pax6,Pax8,Pura,Purb,Rcor1,Sall1,Six1,Smad4,Sox11,Sox3,Sox5,Stat1,Tbl1x,Tcf12,Tcf20,Tcf4,Tcf7,Tcf7l1,Tcf7l2,Tcfap2c,Wnt11,Yy1,Zfp217,Zfp281
GO Molecular Function	GO:0004871	signal transducer activity	179	0.766	1	1	0.785	5.09	4	550	0.0889	0.00727	6	212	2485	unnamed,unnamed,unnamed,unnamed	unnamed,unnamed,unnamed,unnamed,unnamed,unnamed,unnamed,unnamed,unnamed,unnamed,unnamed,unnamed,unnamed,unnamed,unnamed,unnamed,unnamed,unnamed,unnamed,unnamed,unnamed,unnamed,unnamed,unnamed,unnamed,unnamed,unnamed,unnamed,unnamed,unnamed,unnamed,unnamed,unnamed,unnamed,unnamed,unnamed,unnamed,unnamed,unnamed,unnamed,unnamed,unnamed,unnamed,unnamed,unnamed,unnamed,unnamed,unnamed,unnamed,unnamed…	Gabra2,Gabrg1,Il6st,Olfr119,Olfr120,Tnfrsf11a	3110082D06Rik,Acvr1b,Adra1d,Adrb1,Adrbk1,Ahr,Akap10,Ar,Arhgef11,Arnt2,Axin2,B230120H23Rik,Bmpr1a,Bmpr1b,Bmpr2,Braf,C5ar1,Cbl,Cblb,Cd44,Celsr2,Celsr3,Chrm2,Chrm5,Chrnb1,Clock,Crhr2,Darc,Drd2,Epas1,Epha5,Esrrb,Fgfr3,Frzb,Fzd1,Fzd3,Fzd8,Fzd9,Gabbr1,Gabbr2,Gabra1,Gabra2,Gabra3,Gabrb1,Gabrg1,Gabrg2,Galr2,Gfra4,Gm614,Gna12,Gna14,Gnao1,Gnaq,Gnb4,Gng4,Gpr124,Gpr125,Gpr132,Gpr135,Gpr157,Gpr158,Gpr160,Gpr1…
GO Molecular Function	GO:0005525	GTP binding	180	0.776	1	1	0.684	1.46	1	158	0.0222	0.00633	1	75	377	unnamed	unnamed,unnamed,unnamed,unnamed,unnamed,unnamed,unnamed,unnamed,unnamed,unnamed,unnamed,unnamed,unnamed,unnamed,unnamed,unnamed,unnamed,unnamed,unnamed,unnamed,unnamed,unnamed,unnamed,unnamed,unnamed,unnamed,unnamed,unnamed,unnamed,unnamed,unnamed,unnamed,unnamed,unnamed,unnamed,unnamed,unnamed,unnamed,unnamed,unnamed,unnamed,unnamed,unnamed,unnamed,unnamed,unnamed,unnamed,unnamed,unnamed,unnamed…	Rnd2	Agap1,Agap2,Agap3,Arf1,Arf3,Arf4,Arf6,Arhgap5,Arl1,Arl10,Arl15,Arl3,Arl5b,Arl5c,Arl8a,Atl3,Dnm1l,Dnm3,Dock4,Dock7,Eef1a2,Eras,Ercc3,Gch1,Glud1,Gna12,Gna14,Gnao1,Gnaq,Gpn3,Grlf1,Gtpbp2,Gtpbp4,Gtpbp8,Ift27,Kras,Mfn1,Nkiras1,Opa1,Rab1,Rab11a,Rab14,Rab18,Rab21,Rab30,Rab32,Rab33b,Rab35,Rab3c,Rab43,Rab6b,Rab9b,Rabl2,Rabl5,Rala,Rap1a,Rap1b,Rasd2,Rem2,Rheb,Rhoa,Rhob,Rhog,Rit1,Rit2,Rnd2,Rraga,Rras2,Sept10…
GO Molecular Function	GO:0005488	binding	181	0.78	1	1	0.956	35.6	34	3840	0.756	0.00885	40	2224	11144	unnamed,unnamed,unnamed,unnamed,unnamed,unnamed,unnamed,unnamed,unnamed,unnamed,unnamed,unnamed,unnamed,unnamed,unnamed,unnamed,unnamed,unnamed,unnamed,unnamed,unnamed,unnamed,unnamed,unnamed,unnamed,unnamed,unnamed,unnamed,unnamed,unnamed,unnamed,unnamed,unnamed,unnamed	unnamed,unnamed,unnamed,unnamed,unnamed,unnamed,unnamed,unnamed,unnamed,unnamed,unnamed,unnamed,unnamed,unnamed,unnamed,unnamed,unnamed,unnamed,unnamed,unnamed,unnamed,unnamed,unnamed,unnamed,unnamed,unnamed,unnamed,unnamed,unnamed,unnamed,unnamed,unnamed,unnamed,unnamed,unnamed,unnamed,unnamed,unnamed,unnamed,unnamed,unnamed,unnamed,unnamed,unnamed,unnamed,unnamed,unnamed,unnamed,unnamed,unnamed…	2310035C23Rik,Arvcf,Brca1,Chfr,Cplx1,Dach1,Dip2a,Dis3l,Dnajb1,Eif4h,Epb4.1l1,Gabra2,Gak,Gapdh,Gfap,Gipc1,Hipk4,Hspa1b,Ide,Il6st,Limk1,Mafg,March5,Mdm4,Mon2,Nefl,Neu1,Neurl1b,Ogdhl,Pik3c2b,Ppip5k2,Rnd2,S100b,Sncb,Thoc3,Tipin,Tnfrsf11a,Txnrd2,Zc3h12c,Zfp605	1110017D15Rik,1500003O03Rik,1500010J02Rik,1700010M22Rik,2310003H01Rik,2310035C23Rik,2410022L05Rik,2410091C18Rik,2610101N10Rik,2700078E11Rik,2700078K21Rik,2810021J22Rik,2900011O08Rik,2900064A13Rik,3632451O06Rik,4921513D23Rik,4921515J06Rik,4922501C03Rik,4930595M18Rik,4932442L08Rik,4933405O20Rik,4933426I21Rik,A1cf,A930001N09Rik,AI314180,AK011498,AK028549,Aarsd1,Aasdhppt,Abca8b,Abcb5,Abcb7,Abcc4,Abcg…
GO Molecular Function	GO:0032561	guanyl ribonucleotide binding	182	0.784	1	1	0.667	1.5	1	162	0.0222	0.00617	1	76	390	unnamed	unnamed,unnamed,unnamed,unnamed,unnamed,unnamed,unnamed,unnamed,unnamed,unnamed,unnamed,unnamed,unnamed,unnamed,unnamed,unnamed,unnamed,unnamed,unnamed,unnamed,unnamed,unnamed,unnamed,unnamed,unnamed,unnamed,unnamed,unnamed,unnamed,unnamed,unnamed,unnamed,unnamed,unnamed,unnamed,unnamed,unnamed,unnamed,unnamed,unnamed,unnamed,unnamed,unnamed,unnamed,unnamed,unnamed,unnamed,unnamed,unnamed,unnamed…	Rnd2	Agap1,Agap2,Agap3,Arf1,Arf3,Arf4,Arf6,Arhgap5,Arl1,Arl10,Arl15,Arl3,Arl5b,Arl5c,Arl8a,Atl3,Dnm1l,Dnm3,Dock4,Dock7,Eef1a2,Eras,Ercc3,Gch1,Glud1,Gna12,Gna14,Gnao1,Gnaq,Gpn3,Grlf1,Gtpbp2,Gtpbp4,Gtpbp8,Ift27,Kras,Mfn1,Nkiras1,Opa1,Prkg2,Rab1,Rab11a,Rab14,Rab18,Rab21,Rab30,Rab32,Rab33b,Rab35,Rab3c,Rab43,Rab6b,Rab9b,Rabl2,Rabl5,Rala,Rap1a,Rap1b,Rasd2,Rem2,Rheb,Rhoa,Rhob,Rhog,Rit1,Rit2,Rnd2,Rraga,Rras2,…
GO Molecular Function	GO:0005083	small GTPase regulator activity	183	0.79	1	1	0.655	1.53	1	165	0.0222	0.00606	1	67	237	unnamed	unnamed,unnamed,unnamed,unnamed,unnamed,unnamed,unnamed,unnamed,unnamed,unnamed,unnamed,unnamed,unnamed,unnamed,unnamed,unnamed,unnamed,unnamed,unnamed,unnamed,unnamed,unnamed,unnamed,unnamed,unnamed,unnamed,unnamed,unnamed,unnamed,unnamed,unnamed,unnamed,unnamed,unnamed,unnamed,unnamed,unnamed,unnamed,unnamed,unnamed,unnamed,unnamed,unnamed,unnamed,unnamed,unnamed,unnamed,unnamed,unnamed,unnamed…	Mon2	Adap1,Agap1,Agap2,Agap3,Agfg1,Akap13,Arap1,Arap3,Arfgap3,Arhgap10,Arhgdia,Arhgef11,Arhgef2,Arhgef26,Asap1,Asap2,Bcr,Cdc42bpa,Cit,Cyth1,Cyth2,Cyth4,D10Bwg1379e,Dab2ip,Dock4,Farp1,Gdi1,Git2,Gopc,Grtp1,Iqgap2,Iqsec1,Itsn2,Map4k2,Mon2,Ophn1,Psd2,Psd3,Ralgapa2,Rapgef4,Rapgef5,Rasa1,Rasa2,Rasgef1b,Rasgrf2,Rhpn1,Sgsm3,Spata13,Srgap1,Tbc1d10a,Tbc1d10b,Tbc1d15,Tbc1d19,Tbc1d2,Tbc1d20,Tbc1d22a,Tbc1d24,Tbc1d…
GO Molecular Function	GO:0008134	transcription factor binding	184	0.796	1	1	0.643	1.56	1	168	0.0222	0.00595	1	69	319	unnamed	unnamed,unnamed,unnamed,unnamed,unnamed,unnamed,unnamed,unnamed,unnamed,unnamed,unnamed,unnamed,unnamed,unnamed,unnamed,unnamed,unnamed,unnamed,unnamed,unnamed,unnamed,unnamed,unnamed,unnamed,unnamed,unnamed,unnamed,unnamed,unnamed,unnamed,unnamed,unnamed,unnamed,unnamed,unnamed,unnamed,unnamed,unnamed,unnamed,unnamed,unnamed,unnamed,unnamed,unnamed,unnamed,unnamed,unnamed,unnamed,unnamed,unnamed…	Dip2a	Ahr,Apbb2,Ar,Arap1,Arnt2,Arrb1,Baz1b,Bcl10,Bcl2,Cand1,Crebbp,Ctnnb1,Dip2a,Dip2b,Dip2c,E2f1,Egr2,Epas1,Ercc3,Esrrb,Foxd1,Foxe3,Foxf1a,Foxo4,Foxp4,Foxs1,Gabbr1,Gnptab,Gtf2a1,Hand1,Hdac3,Hdac4,Hes1,Hes5,Hoxa7,Htt,Id4,Kctd1,Klf4,Lmo4,Lpin1,Mafb,Med14,Mef2a,Mef2d,Nab1,Nfatc1,Nfkbia,Nkx2-5,Notch2,Nrip1,Pim1,Ppargc1a,Psma6,Pura,Purb,Rab18,Rbfox2,Rbpj,Rem2,Sall1,Smad2,Smarcd3,Tcf4,Trib2,Wfs1,Yeats2,Ywhaz…
GO Molecular Function	GO:0003712	transcription cofactor activity	185	0.802	1	1	0.632	1.58	1	171	0.0222	0.00585	1	60	273	unnamed	unnamed,unnamed,unnamed,unnamed,unnamed,unnamed,unnamed,unnamed,unnamed,unnamed,unnamed,unnamed,unnamed,unnamed,unnamed,unnamed,unnamed,unnamed,unnamed,unnamed,unnamed,unnamed,unnamed,unnamed,unnamed,unnamed,unnamed,unnamed,unnamed,unnamed,unnamed,unnamed,unnamed,unnamed,unnamed,unnamed,unnamed,unnamed,unnamed,unnamed,unnamed,unnamed,unnamed,unnamed,unnamed,unnamed,unnamed,unnamed,unnamed,unnamed…	Scand1	Aes,Arid5b,Arl2bp,Basp1,Bcl10,Bhlhe41,Calcoco1,Cops5,Crebbp,Ctbp2,Ctnnb1,Dyrk1b,Elf3,Esrrb,Hand1,Hdac3,Hdac4,Heyl,Hipk2,Hipk3,Jazf1,Jmy,Kat2a,Kat5,Kctd1,Ldb1,Lpin1,Lpin2,Maml1,Med13l,Med14,Med15,Med18,Med26,Meg3,Mkl1,Mkl2,Mll5,Ncoa1,Ncoa3,Nrip1,Pex14,Pias4,Ppargc1a,Ppargc1b,Rbfox2,Rnf20,Sall1,Sap30,Scai,Scand1,Skor2,Sox11,Sox3,Tbl1x,Tcf4,Tob1,Ube3a,Usp22,Wdr77
GO Molecular Function	GO:0000989	transcription factor binding transcription factor activity	186	0.804	1	1	0.628	1.59	1	172	0.0222	0.00581	1	62	283	unnamed	unnamed,unnamed,unnamed,unnamed,unnamed,unnamed,unnamed,unnamed,unnamed,unnamed,unnamed,unnamed,unnamed,unnamed,unnamed,unnamed,unnamed,unnamed,unnamed,unnamed,unnamed,unnamed,unnamed,unnamed,unnamed,unnamed,unnamed,unnamed,unnamed,unnamed,unnamed,unnamed,unnamed,unnamed,unnamed,unnamed,unnamed,unnamed,unnamed,unnamed,unnamed,unnamed,unnamed,unnamed,unnamed,unnamed,unnamed,unnamed,unnamed,unnamed…	Scand1	AK028549,Aes,Arid5b,Arl2bp,Basp1,Bcl10,Bhlhe41,Calcoco1,Cops5,Crebbp,Ctbp2,Ctnnb1,Dyrk1b,Elf3,Esrrb,Hand1,Hdac3,Hdac4,Heyl,Hipk2,Hipk3,Jazf1,Jmy,Kat2a,Kat5,Kctd1,Klf4,Ldb1,Lpin1,Lpin2,Maml1,Med13l,Med14,Med15,Med18,Med26,Meg3,Mkl1,Mkl2,Mll5,Ncoa1,Ncoa3,Nrip1,Pex14,Pias4,Ppargc1a,Ppargc1b,Rbfox2,Rnf20,Sall1,Sap30,Scai,Scand1,Skor2,Sox11,Sox3,Tbl1x,Tcf4,Tob1,Ube3a,Usp22,Wdr77
GO Molecular Function	GO:0000988	protein binding transcription factor activity	187	0.808	1	1	0.621	1.61	1	174	0.0222	0.00575	1	63	290	unnamed	unnamed,unnamed,unnamed,unnamed,unnamed,unnamed,unnamed,unnamed,unnamed,unnamed,unnamed,unnamed,unnamed,unnamed,unnamed,unnamed,unnamed,unnamed,unnamed,unnamed,unnamed,unnamed,unnamed,unnamed,unnamed,unnamed,unnamed,unnamed,unnamed,unnamed,unnamed,unnamed,unnamed,unnamed,unnamed,unnamed,unnamed,unnamed,unnamed,unnamed,unnamed,unnamed,unnamed,unnamed,unnamed,unnamed,unnamed,unnamed,unnamed,unnamed…	Scand1	AK028549,Aes,Arid5b,Arl2bp,Basp1,Bcl10,Bhlhe41,Calcoco1,Cops5,Crebbp,Ctbp2,Ctnnb1,Dyrk1b,Elf3,Esrrb,Hand1,Hdac3,Hdac4,Heyl,Hipk2,Hipk3,Jazf1,Jmy,Kat2a,Kat5,Kctd1,Klf4,Ldb1,Lhx3,Lpin1,Lpin2,Maml1,Med13l,Med14,Med15,Med18,Med26,Meg3,Mkl1,Mkl2,Mll5,Ncoa1,Ncoa3,Nrip1,Pex14,Pias4,Ppargc1a,Ppargc1b,Rbfox2,Rnf20,Sall1,Sap30,Scai,Scand1,Skor2,Sox11,Sox3,Tbl1x,Tcf4,Tob1,Ube3a,Usp22,Wdr77
GO Molecular Function	GO:0005509	calcium ion binding	188	0.826	1	1	0.647	3.09	2	334	0.0444	0.00599	2	142	595	unnamed,unnamed	unnamed,unnamed,unnamed,unnamed,unnamed,unnamed,unnamed,unnamed,unnamed,unnamed,unnamed,unnamed,unnamed,unnamed,unnamed,unnamed,unnamed,unnamed,unnamed,unnamed,unnamed,unnamed,unnamed,unnamed,unnamed,unnamed,unnamed,unnamed,unnamed,unnamed,unnamed,unnamed,unnamed,unnamed,unnamed,unnamed,unnamed,unnamed,unnamed,unnamed,unnamed,unnamed,unnamed,unnamed,unnamed,unnamed,unnamed,unnamed,unnamed,unnamed…	S100b,Sncb	1500003O03Rik,Acan,Actn1,Adam8,Anxa6,Arsa,Atp2a2,Cabp1,Cabp7,Cabyr,Calb1,Calb2,Calm2,Calm3,Calml3,Camkk2,Capn1,Cbl,Cblb,Ccar1,Cdh12,Cdh18,Cdh26,Cdh4,Cdh6,Cdhr1,Cdk5r1,Celsr2,Celsr3,Cib2,Clgn,Clstn1,Cps1,Creld1,Dag1,Dgkb,Dgkg,Dlk1,Dtnb,Edem1,Edem3,Eef2k,Efcab1,Efcab2,Efha2,Efhc1,Efhc2,Eps15,Fbln5,Frem2,Fstl4,Galnt3,Gca,Gch1,Gm608,Grin1,Heg1,Hmcn2,Itsn2,Jag2,Kcnip2,Kcnip4,Letm1,Lpcat1,Lpcat4,Man1a,…
GO Molecular Function	GO:0008047	enzyme activator activity	189	0.85	1	1	0.54	1.85	1	200	0.0222	0.005	1	90	313	unnamed	unnamed,unnamed,unnamed,unnamed,unnamed,unnamed,unnamed,unnamed,unnamed,unnamed,unnamed,unnamed,unnamed,unnamed,unnamed,unnamed,unnamed,unnamed,unnamed,unnamed,unnamed,unnamed,unnamed,unnamed,unnamed,unnamed,unnamed,unnamed,unnamed,unnamed,unnamed,unnamed,unnamed,unnamed,unnamed,unnamed,unnamed,unnamed,unnamed,unnamed,unnamed,unnamed,unnamed,unnamed,unnamed,unnamed,unnamed,unnamed,unnamed,unnamed…	Gipc1	Adap1,Afap1l2,Agap1,Agap2,Agap3,Agfg1,Ahsa1,Ahsa2,Aifm3,Apoa1,App,Arap1,Arap3,Arfgap3,Arhgap10,Arhgap12,Arhgap21,Arhgap22,Arhgap28,Arhgap32,Arhgap36,Arhgap42,Arhgap5,Arhgdia,Arrb1,Asap1,Asap2,Axin2,Bcl10,Bcr,Cab39,Cdk5r1,Cdk5r2,Chn1,Dab2ip,Depdc1b,Dock4,Dusp19,Gapvd1,Gdi1,Ghrl,Gipc1,Git2,Gnaq,Grlf1,Grtp1,Iqgap2,Ltc4s,Map3k5,Mapk8ip2,Ophn1,Pak2,Pcolce2,Pik3ca,Plcb1,Prkce,Rab3gap2,Rabep1,Ralgapa2,R…
GO Molecular Function	GO:0008289	lipid binding	190	0.863	1	1	0.517	1.94	1	209	0.0222	0.00478	1	95	428	unnamed	unnamed,unnamed,unnamed,unnamed,unnamed,unnamed,unnamed,unnamed,unnamed,unnamed,unnamed,unnamed,unnamed,unnamed,unnamed,unnamed,unnamed,unnamed,unnamed,unnamed,unnamed,unnamed,unnamed,unnamed,unnamed,unnamed,unnamed,unnamed,unnamed,unnamed,unnamed,unnamed,unnamed,unnamed,unnamed,unnamed,unnamed,unnamed,unnamed,unnamed,unnamed,unnamed,unnamed,unnamed,unnamed,unnamed,unnamed,unnamed,unnamed,unnamed…	Pik3c2b	1700010M22Rik,Acbd3,Acbd5,Acbd6,Anxa6,Ap2m1,Apba1,Apoa1,Apold1,Ar,Arap1,Arap3,Arhgap32,Atp5g2,Bdh1,Calb1,Cdipt,Cdk5r2,Col4a3bp,Cpne6,Cps1,Cyp26b1,Cyp26c1,Epb4.1,Epn3,Esrrb,Fabp3,Fert2,Fnta,Gab2,Hs1bp3,Hspa2,Kif16b,Lama1,Lamb1,Lancl2,Lpl,Ltc4s,Lyn,Mark1,Mtm1,Nr3c2,Nr5a2,Nsfl1c,Osbpl11,Paqr8,Pard3,Pclo,Pcyt1a,Pebp1,Pggt1b,Pgr,Picalm,Pik3c2b,Pitpna,Pitpnb,Pla2g7,Plcb1,Plcb2,Pld2,Plekha1,Plekha8,Pon1…
GO Molecular Function	GO:0022857	transmembrane transporter activity	191	0.879	1	1	0.617	4.86	3	525	0.0667	0.00571	3	213	867	unnamed,unnamed,unnamed	unnamed,unnamed,unnamed,unnamed,unnamed,unnamed,unnamed,unnamed,unnamed,unnamed,unnamed,unnamed,unnamed,unnamed,unnamed,unnamed,unnamed,unnamed,unnamed,unnamed,unnamed,unnamed,unnamed,unnamed,unnamed,unnamed,unnamed,unnamed,unnamed,unnamed,unnamed,unnamed,unnamed,unnamed,unnamed,unnamed,unnamed,unnamed,unnamed,unnamed,unnamed,unnamed,unnamed,unnamed,unnamed,unnamed,unnamed,unnamed,unnamed,unnamed…	Cplx1,Gabra2,Gabrg1	2010001E11Rik,Abcb5,Abcb7,Abcc4,Abcg1,Ano5,Ano6,Ano7,Aqp4,Aqp8,Atp10a,Atp13a3,Atp1a3,Atp1b1,Atp1b3,Atp1b4,Atp2a2,Atp2b3,Atp2b4,Atp2c2,Atp5d,Atp5g2,Atp5j,Atp6ap1l,Atp6v0c,Atp6v0e,Atp6v0e2,Atp6v1c1,Atp6v1d,Atp6v1e1,Atp6v1g3,Atp8a2,Atp9b,Bcl2,CacnB2,Cacna1b,Cacna1e,Cacna2d1,Cacnb1,Cacnb3,Cacng1,Cacng2,Cacng3,Cacng5,Cacng6,Cacng7,Cacng8,Ccdc109a,Chrm5,Chrna7,Chrnb1,Clcn5,Clcn6,Cox10,Cox15,Cox5b,Cox7a…
GO Molecular Function	GO:0004930	G-protein coupled receptor activity	192	0.888	1	1	0.47	2.13	1	230	0.0222	0.00435	2	87	1739	unnamed	unnamed,unnamed,unnamed,unnamed,unnamed,unnamed,unnamed,unnamed,unnamed,unnamed,unnamed,unnamed,unnamed,unnamed,unnamed,unnamed,unnamed,unnamed,unnamed,unnamed,unnamed,unnamed,unnamed,unnamed,unnamed,unnamed,unnamed,unnamed,unnamed,unnamed,unnamed,unnamed,unnamed,unnamed,unnamed,unnamed,unnamed,unnamed,unnamed,unnamed,unnamed,unnamed,unnamed,unnamed,unnamed,unnamed,unnamed,unnamed,unnamed,unnamed…	Olfr119,Olfr120	Adra1d,Adrb1,C5ar1,Celsr2,Celsr3,Chrm2,Chrm5,Crhr2,Darc,Drd2,Fzd1,Fzd3,Fzd8,Fzd9,Gabbr1,Gabbr2,Galr2,Gpr124,Gpr125,Gpr132,Gpr135,Gpr157,Gpr158,Gpr160,Gpr165,Gpr19,Gpr27,Gpr3,Gpr37l1,Gpr62,Gpr65,Gpr75,Gpr83,Gpr85,Grm1,Grm3,Grm5,Grpr,Htr1b,Htr2a,Htr5b,Htr7,Lphn3,Mc2r,Mc5r,Mchr1,Mtnr1b,Npffr1,Npffr2,Npsr1,Olfr119,Olfr120,Olfr1274-ps,Olfr1373,Olfr1506,Olfr221,Olfr267,Olfr311,Olfr49,Olfr669,Olfr670,Ol…
GO Molecular Function	GO:0022836	gated channel activity	193	0.895	1	1	0.458	2.19	1	236	0.0222	0.00424	2	88	298	unnamed	unnamed,unnamed,unnamed,unnamed,unnamed,unnamed,unnamed,unnamed,unnamed,unnamed,unnamed,unnamed,unnamed,unnamed,unnamed,unnamed,unnamed,unnamed,unnamed,unnamed,unnamed,unnamed,unnamed,unnamed,unnamed,unnamed,unnamed,unnamed,unnamed,unnamed,unnamed,unnamed,unnamed,unnamed,unnamed,unnamed,unnamed,unnamed,unnamed,unnamed,unnamed,unnamed,unnamed,unnamed,unnamed,unnamed,unnamed,unnamed,unnamed,unnamed…	Gabra2,Gabrg1	CacnB2,Cacna1b,Cacna1e,Cacna2d1,Cacnb1,Cacnb3,Cacng1,Cacng2,Cacng3,Cacng5,Cacng6,Cacng7,Cacng8,Chrm5,Chrna7,Chrnb1,Clcn5,Clcn6,Gabra1,Gabra2,Gabra3,Gabrb1,Gabrg1,Gabrg2,Glra1,Glrb,Gria2,Grid1,Grik2,Grik4,Grin1,Grin2a,Grin2b,Grin2c,Grin3b,Hcn1,Hcn4,Jph2,Kcna1,Kcna10,Kcna2,Kcna5,Kcna6,Kcnb1,Kcnb2,Kcnc1,Kcnc4,Kcne4,Kcng1,Kcng4,Kcnh3,Kcnh5,Kcnh7,Kcnip2,Kcnip4,Kcnj11,Kcnj12,Kcnj13,Kcnj16,Kcnj2,Kcnj3,K…
GO Molecular Function	GO:0030234	enzyme regulator activity	194	0.898	1	1	0.536	3.73	2	403	0.0444	0.00496	2	181	823	unnamed,unnamed	unnamed,unnamed,unnamed,unnamed,unnamed,unnamed,unnamed,unnamed,unnamed,unnamed,unnamed,unnamed,unnamed,unnamed,unnamed,unnamed,unnamed,unnamed,unnamed,unnamed,unnamed,unnamed,unnamed,unnamed,unnamed,unnamed,unnamed,unnamed,unnamed,unnamed,unnamed,unnamed,unnamed,unnamed,unnamed,unnamed,unnamed,unnamed,unnamed,unnamed,unnamed,unnamed,unnamed,unnamed,unnamed,unnamed,unnamed,unnamed,unnamed,unnamed…	Gipc1,Mon2	4930449I24Rik,4930596D02Rik,Adap1,Afap1l2,Agap1,Agap2,Agap3,Agfg1,Ahsa1,Ahsa2,Aifm3,Akap13,Anp32e,Apc,Apoa1,App,Arap1,Arap3,Arfgap3,Arhgap10,Arhgap12,Arhgap21,Arhgap22,Arhgap28,Arhgap32,Arhgap36,Arhgap42,Arhgap5,Arhgdia,Arhgef11,Arhgef2,Arhgef26,Arpp19,Arrb1,Asap1,Asap2,Axin2,Bcl10,Bcr,Cab39,Cabyr,Camk2n1,Ccnd1,Ccny,Cd46,Cdc42bpa,Cdk5r1,Cdk5r2,Cdkn1b,Chn1,Cit,Col28a1,Crim1,Csnk2a1,Cyth1,Cyth2,Cyt…
GO Molecular Function	GO:0043565	sequence-specific DNA binding	195	0.914	1	1	0.42	2.38	1	257	0.0222	0.00389	1	113	653	unnamed	unnamed,unnamed,unnamed,unnamed,unnamed,unnamed,unnamed,unnamed,unnamed,unnamed,unnamed,unnamed,unnamed,unnamed,unnamed,unnamed,unnamed,unnamed,unnamed,unnamed,unnamed,unnamed,unnamed,unnamed,unnamed,unnamed,unnamed,unnamed,unnamed,unnamed,unnamed,unnamed,unnamed,unnamed,unnamed,unnamed,unnamed,unnamed,unnamed,unnamed,unnamed,unnamed,unnamed,unnamed,unnamed,unnamed,unnamed,unnamed,unnamed,unnamed…	Mafg	A930001N09Rik,Adnp2,Ahr,Ar,Atf1,Atf2,Atf3,Atoh1,Bach2,Barhl1,Bcl2,Calcoco1,Chrac1,Crebl2,Dnmt3a,E2f1,Elf2,Elf3,Epas1,Esrrb,Esx1,Etv1,Etv4,Etv5,Fev,Foxd1,Foxe3,Foxf1a,Foxo4,Foxp4,Foxs1,Gabpa,Gatad2b,Hand1,Hdac4,Hes1,Heyl,Hmbox1,Homez,Hoxa3,Hoxa7,Hoxc10,Hoxc6,Hoxc8,Hoxc9,Hoxd10,Hoxd11,Hoxd3,Hoxd8,Hsfy2,Irf1,Junb,Klf4,Lass4,Lass6,Ldb1,Lhx3,Lhx4,Lmo4,Mafa,Mafb,Mafg,Mbd2,Mef2a,Mef2d,Mkx,Mnx1,Msh2,Mta3…
GO Molecular Function	GO:0005216	ion channel activity	196	0.927	1	1	0.394	2.54	1	274	0.0222	0.00365	2	104	377	unnamed	unnamed,unnamed,unnamed,unnamed,unnamed,unnamed,unnamed,unnamed,unnamed,unnamed,unnamed,unnamed,unnamed,unnamed,unnamed,unnamed,unnamed,unnamed,unnamed,unnamed,unnamed,unnamed,unnamed,unnamed,unnamed,unnamed,unnamed,unnamed,unnamed,unnamed,unnamed,unnamed,unnamed,unnamed,unnamed,unnamed,unnamed,unnamed,unnamed,unnamed,unnamed,unnamed,unnamed,unnamed,unnamed,unnamed,unnamed,unnamed,unnamed,unnamed…	Gabra2,Gabrg1	Abcc4,Ano5,Ano6,Ano7,CacnB2,Cacna1b,Cacna1e,Cacna2d1,Cacnb1,Cacnb3,Cacng1,Cacng2,Cacng3,Cacng5,Cacng6,Cacng7,Cacng8,Ccdc109a,Chrm5,Chrna7,Chrnb1,Clcn5,Clcn6,Fam38b,Gabra1,Gabra2,Gabra3,Gabrb1,Gabrg1,Gabrg2,Glra1,Glrb,Gria2,Grid1,Grik2,Grik4,Grin1,Grin2a,Grin2b,Grin2c,Grin3b,Hcn1,Hcn4,Jph2,Kcna1,Kcna10,Kcna2,Kcna5,Kcna6,Kcnb1,Kcnb2,Kcnc1,Kcnc4,Kcne4,Kcng1,Kcng4,Kcnh3,Kcnh5,Kcnh7,Kcnip2,Kcnip4,Kcnj…
GO Molecular Function	GO:0022838	substrate-specific channel activity	197	0.928	1	1	0.393	2.55	1	275	0.0222	0.00364	2	106	385	unnamed	unnamed,unnamed,unnamed,unnamed,unnamed,unnamed,unnamed,unnamed,unnamed,unnamed,unnamed,unnamed,unnamed,unnamed,unnamed,unnamed,unnamed,unnamed,unnamed,unnamed,unnamed,unnamed,unnamed,unnamed,unnamed,unnamed,unnamed,unnamed,unnamed,unnamed,unnamed,unnamed,unnamed,unnamed,unnamed,unnamed,unnamed,unnamed,unnamed,unnamed,unnamed,unnamed,unnamed,unnamed,unnamed,unnamed,unnamed,unnamed,unnamed,unnamed…	Gabra2,Gabrg1	Abcc4,Ano5,Ano6,Ano7,Aqp4,Aqp8,CacnB2,Cacna1b,Cacna1e,Cacna2d1,Cacnb1,Cacnb3,Cacng1,Cacng2,Cacng3,Cacng5,Cacng6,Cacng7,Cacng8,Ccdc109a,Chrm5,Chrna7,Chrnb1,Clcn5,Clcn6,Fam38b,Gabra1,Gabra2,Gabra3,Gabrb1,Gabrg1,Gabrg2,Glra1,Glrb,Gria2,Grid1,Grik2,Grik4,Grin1,Grin2a,Grin2b,Grin2c,Grin3b,Hcn1,Hcn4,Jph2,Kcna1,Kcna10,Kcna2,Kcna5,Kcna6,Kcnb1,Kcnb2,Kcnc1,Kcnc4,Kcne4,Kcng1,Kcng4,Kcnh3,Kcnh5,Kcnh7,Kcnip2,K…
GO Molecular Function	GO:0015267	channel activity	198	0.939	1	1	0.371	2.69	1	291	0.0222	0.00344	2	110	396	unnamed	unnamed,unnamed,unnamed,unnamed,unnamed,unnamed,unnamed,unnamed,unnamed,unnamed,unnamed,unnamed,unnamed,unnamed,unnamed,unnamed,unnamed,unnamed,unnamed,unnamed,unnamed,unnamed,unnamed,unnamed,unnamed,unnamed,unnamed,unnamed,unnamed,unnamed,unnamed,unnamed,unnamed,unnamed,unnamed,unnamed,unnamed,unnamed,unnamed,unnamed,unnamed,unnamed,unnamed,unnamed,unnamed,unnamed,unnamed,unnamed,unnamed,unnamed…	Gabra2,Gabrg1	Abcc4,Ano5,Ano6,Ano7,Aqp4,Aqp8,Bcl2,CacnB2,Cacna1b,Cacna1e,Cacna2d1,Cacnb1,Cacnb3,Cacng1,Cacng2,Cacng3,Cacng5,Cacng6,Cacng7,Cacng8,Ccdc109a,Chrm5,Chrna7,Chrnb1,Clcn5,Clcn6,Fam38b,Gabra1,Gabra2,Gabra3,Gabrb1,Gabrg1,Gabrg2,Gja3,Gjb1,Glra1,Glrb,Gria2,Grid1,Grik2,Grik4,Grin1,Grin2a,Grin2b,Grin2c,Grin3b,Hcn1,Hcn4,Jph2,Kcna1,Kcna10,Kcna2,Kcna5,Kcna6,Kcnb1,Kcnb2,Kcnc1,Kcnc4,Kcne4,Kcng1,Kcng4,Kcnh3,Kcnh5…
GO Molecular Function	GO:0005215	transporter activity	199	0.946	1	1	0.509	5.89	3	636	0.0667	0.00472	3	260	1096	unnamed,unnamed,unnamed	unnamed,unnamed,unnamed,unnamed,unnamed,unnamed,unnamed,unnamed,unnamed,unnamed,unnamed,unnamed,unnamed,unnamed,unnamed,unnamed,unnamed,unnamed,unnamed,unnamed,unnamed,unnamed,unnamed,unnamed,unnamed,unnamed,unnamed,unnamed,unnamed,unnamed,unnamed,unnamed,unnamed,unnamed,unnamed,unnamed,unnamed,unnamed,unnamed,unnamed,unnamed,unnamed,unnamed,unnamed,unnamed,unnamed,unnamed,unnamed,unnamed,unnamed…	Cplx1,Gabra2,Gabrg1	2010001E11Rik,Abcb5,Abcb7,Abcc4,Abcg1,Ano5,Ano6,Ano7,Ap1g1,Ap1s1,Ap1s2,Ap1s3,Ap4s1,Apoa1,Apom,Aqp11,Aqp12,Aqp4,Aqp8,Atp10a,Atp13a3,Atp1a3,Atp1b1,Atp1b3,Atp1b4,Atp2a2,Atp2b3,Atp2b4,Atp2c2,Atp5d,Atp5g2,Atp5j,Atp6ap1l,Atp6v0c,Atp6v0e,Atp6v0e2,Atp6v1c1,Atp6v1d,Atp6v1e1,Atp6v1g3,Atp8a2,Atp9b,Bcl2,CacnB2,Cacna1b,Cacna1e,Cacna2d1,Cacnb1,Cacnb3,Cacng1,Cacng2,Cacng3,Cacng5,Cacng6,Cacng7,Cacng8,Ccdc109a,Ch…
GO Molecular Function	GO:0003677	DNA binding	200	0.97	1	1	0.455	6.59	3	712	0.0667	0.00421	3	310	1873	unnamed,unnamed,unnamed	unnamed,unnamed,unnamed,unnamed,unnamed,unnamed,unnamed,unnamed,unnamed,unnamed,unnamed,unnamed,unnamed,unnamed,unnamed,unnamed,unnamed,unnamed,unnamed,unnamed,unnamed,unnamed,unnamed,unnamed,unnamed,unnamed,unnamed,unnamed,unnamed,unnamed,unnamed,unnamed,unnamed,unnamed,unnamed,unnamed,unnamed,unnamed,unnamed,unnamed,unnamed,unnamed,unnamed,unnamed,unnamed,unnamed,unnamed,unnamed,unnamed,unnamed…	Brca1,Dach1,Mafg	1500010J02Rik,2310003H01Rik,A930001N09Rik,AK028549,Adar,Adnp2,Aff3,Agfg1,Ahr,App,Ar,Arap1,Arid2,Arid5b,Arnt2,Arrb1,Atf1,Atf2,Atf3,Atm,Atoh1,Atrx,Bach2,Bahd1,Barhl1,Basp1,Bcl2,Bhlha15,Bhlhe23,Bhlhe41,Brca1,Brd4,Btaf1,Btbd11,C130039O16Rik,Calcoco1,Casz1,Ccdc124,Ccnt1,Cdc5l,Cdk5rap2,Chd1,Chd2,Chd6,Chrac1,Clock,Crebbp,Crebl2,Csdc2,Csrnp3,Ctnnb1,Dach1,Dedd2,Dem1,Dnmt3a,E2f1,E2f3,E2f7,Egr2,Elf2,Elf3,Ep…
GO Molecular Function	GO:0015075	ion transmembrane transporter activity	201	0.981	1	1	0.266	3.76	1	406	0.0222	0.00246	2	163	678	unnamed	unnamed,unnamed,unnamed,unnamed,unnamed,unnamed,unnamed,unnamed,unnamed,unnamed,unnamed,unnamed,unnamed,unnamed,unnamed,unnamed,unnamed,unnamed,unnamed,unnamed,unnamed,unnamed,unnamed,unnamed,unnamed,unnamed,unnamed,unnamed,unnamed,unnamed,unnamed,unnamed,unnamed,unnamed,unnamed,unnamed,unnamed,unnamed,unnamed,unnamed,unnamed,unnamed,unnamed,unnamed,unnamed,unnamed,unnamed,unnamed,unnamed,unnamed…	Gabra2,Gabrg1	Abcc4,Ano5,Ano6,Ano7,Atp10a,Atp13a3,Atp1a3,Atp1b1,Atp1b3,Atp1b4,Atp2a2,Atp2b3,Atp2b4,Atp2c2,Atp5d,Atp5g2,Atp5j,Atp6ap1l,Atp6v0c,Atp6v0e,Atp6v0e2,Atp6v1c1,Atp6v1d,Atp6v1e1,Atp6v1g3,Atp8a2,Atp9b,CacnB2,Cacna1b,Cacna1e,Cacna2d1,Cacnb1,Cacnb3,Cacng1,Cacng2,Cacng3,Cacng5,Cacng6,Cacng7,Cacng8,Ccdc109a,Chrm5,Chrna7,Chrnb1,Clcn5,Clcn6,Cox10,Cox15,Cox5b,Cox7a1,Cox7a2,Fam38b,Gabra1,Gabra2,Gabra3,Gabrb1,Gab…
GO Molecular Function	GO:0022891	substrate-specific transmembrane transporter activity	202	0.989	1	1	0.233	4.29	1	463	0.0222	0.00216	2	189	780	unnamed	unnamed,unnamed,unnamed,unnamed,unnamed,unnamed,unnamed,unnamed,unnamed,unnamed,unnamed,unnamed,unnamed,unnamed,unnamed,unnamed,unnamed,unnamed,unnamed,unnamed,unnamed,unnamed,unnamed,unnamed,unnamed,unnamed,unnamed,unnamed,unnamed,unnamed,unnamed,unnamed,unnamed,unnamed,unnamed,unnamed,unnamed,unnamed,unnamed,unnamed,unnamed,unnamed,unnamed,unnamed,unnamed,unnamed,unnamed,unnamed,unnamed,unnamed…	Gabra2,Gabrg1	Abcc4,Ano5,Ano6,Ano7,Aqp4,Aqp8,Atp10a,Atp13a3,Atp1a3,Atp1b1,Atp1b3,Atp1b4,Atp2a2,Atp2b3,Atp2b4,Atp2c2,Atp5d,Atp5g2,Atp5j,Atp6ap1l,Atp6v0c,Atp6v0e,Atp6v0e2,Atp6v1c1,Atp6v1d,Atp6v1e1,Atp6v1g3,Atp8a2,Atp9b,CacnB2,Cacna1b,Cacna1e,Cacna2d1,Cacnb1,Cacnb3,Cacng1,Cacng2,Cacng3,Cacng5,Cacng6,Cacng7,Cacng8,Ccdc109a,Chrm5,Chrna7,Chrnb1,Clcn5,Clcn6,Cox10,Cox15,Cox5b,Cox7a1,Cox7a2,Fam38b,Gabra1,Gabra2,Gabra3,…
GO Molecular Function	GO:0022892	substrate-specific transporter activity	203	0.994	1	1	0.205	4.89	1	528	0.0222	0.00189	2	219	889	unnamed	unnamed,unnamed,unnamed,unnamed,unnamed,unnamed,unnamed,unnamed,unnamed,unnamed,unnamed,unnamed,unnamed,unnamed,unnamed,unnamed,unnamed,unnamed,unnamed,unnamed,unnamed,unnamed,unnamed,unnamed,unnamed,unnamed,unnamed,unnamed,unnamed,unnamed,unnamed,unnamed,unnamed,unnamed,unnamed,unnamed,unnamed,unnamed,unnamed,unnamed,unnamed,unnamed,unnamed,unnamed,unnamed,unnamed,unnamed,unnamed,unnamed,unnamed…	Gabra2,Gabrg1	Abcc4,Abcg1,Ano5,Ano6,Ano7,Ap1g1,Ap1s1,Ap1s2,Ap1s3,Ap4s1,Apoa1,Apom,Aqp4,Aqp8,Atp10a,Atp13a3,Atp1a3,Atp1b1,Atp1b3,Atp1b4,Atp2a2,Atp2b3,Atp2b4,Atp2c2,Atp5d,Atp5g2,Atp5j,Atp6ap1l,Atp6v0c,Atp6v0e,Atp6v0e2,Atp6v1c1,Atp6v1d,Atp6v1e1,Atp6v1g3,Atp8a2,Atp9b,CacnB2,Cacna1b,Cacna1e,Cacna2d1,Cacnb1,Cacnb3,Cacng1,Cacng2,Cacng3,Cacng5,Cacng6,Cacng7,Cacng8,Ccdc109a,Chrm5,Chrna7,Chrnb1,Clcn5,Clcn6,Cog3,Cox10,Co…
GO Biological Process	GO:0010815	bradykinin catabolic process	1	2.2e-07	0.00189	0.00189	61.7	0.0648	4	7	0.0889	0.571	1	1	3	unnamed,unnamed,unnamed,unnamed	unnamed,unnamed,unnamed,unnamed,unnamed,unnamed,unnamed	Ide	Ide
GO Biological Process	GO:0051865	protein autoubiquitination	2	3.09e-07	0.00265	0.00132	31.8	0.157	5	17	0.111	0.294	2	6	26	unnamed,unnamed,unnamed,unnamed,unnamed	unnamed,unnamed,unnamed,unnamed,unnamed,unnamed,unnamed,unnamed,unnamed,unnamed,unnamed,unnamed,unnamed,unnamed,unnamed,unnamed,unnamed	Brca1,March5	Brca1,March5,Rchy1,Stub1,Ube2a,Ube2b
GO Biological Process	GO:0090344	negative regulation of cell aging	3	4.37e-07	0.00375	0.00125	54	0.0741	4	8	0.0889	0.5	1	1	4	unnamed,unnamed,unnamed,unnamed	unnamed,unnamed,unnamed,unnamed,unnamed,unnamed,unnamed,unnamed	2012-03-05	2012-03-05
GO Biological Process	GO:0090342	regulation of cell aging	4	7.82e-07	0.00671	0.00168	48	0.0833	4	9	0.0889	0.444	1	2	10	unnamed,unnamed,unnamed,unnamed	unnamed,unnamed,unnamed,unnamed,unnamed,unnamed,unnamed,unnamed,unnamed	2012-03-05	March5,Nuak1
GO Biological Process	GO:0090141	positive regulation of mitochondrial fission	5	1.29e-06	0.0111	0.00222	43.2	0.0926	4	10	0.0889	0.4	1	2	2	unnamed,unnamed,unnamed,unnamed	unnamed,unnamed,unnamed,unnamed,unnamed,unnamed,unnamed,unnamed,unnamed,unnamed	2012-03-05	Bnip3,March5
GO Biological Process	GO:0043171	peptide catabolic process	5	1.29e-06	0.0111	0.00222	43.2	0.0926	4	10	0.0889	0.4	1	2	8	unnamed,unnamed,unnamed,unnamed	unnamed,unnamed,unnamed,unnamed,unnamed,unnamed,unnamed,unnamed,unnamed,unnamed	Ide	Ide,Mmp13
GO Biological Process	GO:0090140	regulation of mitochondrial fission	5	1.29e-06	0.0111	0.00222	43.2	0.0926	4	10	0.0889	0.4	1	2	3	unnamed,unnamed,unnamed,unnamed	unnamed,unnamed,unnamed,unnamed,unnamed,unnamed,unnamed,unnamed,unnamed,unnamed	2012-03-05	Bnip3,March5
GO Biological Process	GO:0050769	positive regulation of neurogenesis	8	2.78e-06	0.0238	0.00298	14.4	0.417	6	45	0.133	0.133	4	21	109	unnamed,unnamed,unnamed,unnamed,unnamed,unnamed	unnamed,unnamed,unnamed,unnamed,unnamed,unnamed,unnamed,unnamed,unnamed,unnamed,unnamed,unnamed,unnamed,unnamed,unnamed,unnamed,unnamed,unnamed,unnamed,unnamed,unnamed,unnamed,unnamed,unnamed,unnamed,unnamed,unnamed,unnamed,unnamed,unnamed,unnamed,unnamed,unnamed,unnamed,unnamed,unnamed,unnamed,unnamed,unnamed,unnamed,unnamed,unnamed,unnamed,unnamed,unnamed	Gfap,Il6st,Limk1,Nefl	Cdh4,Drd2,Etv5,Gfap,Grm5,Hes1,Il6st,Limk1,Lyn,Mtap1b,Nefl,Ntrk3,Numb,Pax6,Robo1,Sema4d,Shank3,Sox11,Stk11,Trim32,Tspo
GO Biological Process	GO:0050435	beta-amyloid metabolic process	9	3.01e-06	0.0258	0.00287	36	0.111	4	12	0.0889	0.333	1	3	7	unnamed,unnamed,unnamed,unnamed	unnamed,unnamed,unnamed,unnamed,unnamed,unnamed,unnamed,unnamed,unnamed,unnamed,unnamed,unnamed	Ide	Ide,Psen1,Unc13a
GO Biological Process	GO:0000209	protein polyubiquitination	10	3.71e-06	0.0318	0.00318	10.4	0.676	7	73	0.156	0.0959	3	29	104	unnamed,unnamed,unnamed,unnamed,unnamed,unnamed,unnamed	unnamed,unnamed,unnamed,unnamed,unnamed,unnamed,unnamed,unnamed,unnamed,unnamed,unnamed,unnamed,unnamed,unnamed,unnamed,unnamed,unnamed,unnamed,unnamed,unnamed,unnamed,unnamed,unnamed,unnamed,unnamed,unnamed,unnamed,unnamed,unnamed,unnamed,unnamed,unnamed,unnamed,unnamed,unnamed,unnamed,unnamed,unnamed,unnamed,unnamed,unnamed,unnamed,unnamed,unnamed,unnamed,unnamed,unnamed,unnamed,unnamed,unnamed…	Brca1,Chfr,March5	Anapc1,Anapc7,Bcl2,Brca1,Btrc,Chfr,Fbxw11,Gm2058,March5,Rbck1,Rnf152,Rnf167,Rnf168,Rnf20,Stub1,Tnks,Tnks2,Trim32,Ube2a,Ube2b,Ube2c,Ube2d3,Ube2e3,Ube2k,Ube2n,Ube2r2,Ube2w,Ube3a,Zswim2
GO Biological Process	GO:0010638	positive regulation of organelle organization	11	4.04e-06	0.0346	0.00315	8.23	0.972	8	105	0.178	0.0762	3	40	149	unnamed,unnamed,unnamed,unnamed,unnamed,unnamed,unnamed,unnamed	unnamed,unnamed,unnamed,unnamed,unnamed,unnamed,unnamed,unnamed,unnamed,unnamed,unnamed,unnamed,unnamed,unnamed,unnamed,unnamed,unnamed,unnamed,unnamed,unnamed,unnamed,unnamed,unnamed,unnamed,unnamed,unnamed,unnamed,unnamed,unnamed,unnamed,unnamed,unnamed,unnamed,unnamed,unnamed,unnamed,unnamed,unnamed,unnamed,unnamed,unnamed,unnamed,unnamed,unnamed,unnamed,unnamed,unnamed,unnamed,unnamed,unnamed…	Brca1,Limk1,March5	2810002N01Rik,Apc,Arf6,Arrb1,Bcl2l11,Bnip3,Brca1,Cdkn1b,Cfl1,Clip1,Dlg1,Dstn,Fert2,Gpr65,Jarid2,Jmy,Limk1,Lpin1,March5,Mllt11,Mtap1b,Nck1,Nos1,Nusap1,Paxip1,Pebp1,Pfn2,Pink1,Plk4,Rhoa,Rps6ka5,Stmn2,Synpo,Tac1,Terf1,Tgfa,Tnks,Ube2n,Vil1,Wnt11
GO Biological Process	GO:0050772	positive regulation of axonogenesis	12	3.42e-05	0.294	0.0245	20.6	0.194	4	21	0.0889	0.19	2	8	41	unnamed,unnamed,unnamed,unnamed	unnamed,unnamed,unnamed,unnamed,unnamed,unnamed,unnamed,unnamed,unnamed,unnamed,unnamed,unnamed,unnamed,unnamed,unnamed,unnamed,unnamed,unnamed,unnamed,unnamed,unnamed	Limk1,Nefl	Cdh4,Limk1,Mtap1b,Nefl,Ntrk3,Robo1,Sema4d,Stk11
GO Biological Process	GO:0006518	peptide metabolic process	12	3.42e-05	0.294	0.0245	20.6	0.194	4	21	0.0889	0.19	1	10	59	unnamed,unnamed,unnamed,unnamed	unnamed,unnamed,unnamed,unnamed,unnamed,unnamed,unnamed,unnamed,unnamed,unnamed,unnamed,unnamed,unnamed,unnamed,unnamed,unnamed,unnamed,unnamed,unnamed,unnamed,unnamed	Ide	Aldh5a1,Gclc,Gclm,Ggt5,Glo1,Gstp1,Ide,Mmp13,Sod1,Spcs2
GO Biological Process	GO:0010822	positive regulation of mitochondrion organization	12	3.42e-05	0.294	0.0245	20.6	0.194	4	21	0.0889	0.19	1	6	13	unnamed,unnamed,unnamed,unnamed	unnamed,unnamed,unnamed,unnamed,unnamed,unnamed,unnamed,unnamed,unnamed,unnamed,unnamed,unnamed,unnamed,unnamed,unnamed,unnamed,unnamed,unnamed,unnamed,unnamed,unnamed	2012-03-05	2810002N01Rik,Bcl2l11,Bnip3,March5,Mllt11,Pink1
GO Biological Process	GO:0010821	regulation of mitochondrion organization	15	4.16e-05	0.357	0.0238	19.6	0.204	4	22	0.0889	0.182	1	7	21	unnamed,unnamed,unnamed,unnamed	unnamed,unnamed,unnamed,unnamed,unnamed,unnamed,unnamed,unnamed,unnamed,unnamed,unnamed,unnamed,unnamed,unnamed,unnamed,unnamed,unnamed,unnamed,unnamed,unnamed,unnamed,unnamed	2012-03-05	2810002N01Rik,Bcl2l11,Bnip3,Golph3,March5,Mllt11,Pink1
GO Biological Process	GO:0065008	regulation of biological quality	16	5.35e-05	0.459	0.0287	2.49	7.62	19	823	0.422	0.0231	16	364	1635	unnamed,unnamed,unnamed,unnamed,unnamed,unnamed,unnamed,unnamed,unnamed,unnamed,unnamed,unnamed,unnamed,unnamed,unnamed,unnamed,unnamed,unnamed,unnamed	unnamed,unnamed,unnamed,unnamed,unnamed,unnamed,unnamed,unnamed,unnamed,unnamed,unnamed,unnamed,unnamed,unnamed,unnamed,unnamed,unnamed,unnamed,unnamed,unnamed,unnamed,unnamed,unnamed,unnamed,unnamed,unnamed,unnamed,unnamed,unnamed,unnamed,unnamed,unnamed,unnamed,unnamed,unnamed,unnamed,unnamed,unnamed,unnamed,unnamed,unnamed,unnamed,unnamed,unnamed,unnamed,unnamed,unnamed,unnamed,unnamed,unnamed…	Cd7,Cplx1,Gabra2,Gfap,Gipc1,Hspa1b,Il6st,Limk1,Mafg,Mdm4,Nefl,Nefm,Pdia3,S100b,Tnfrsf11a,Txnrd2	1500010J02Rik,A1cf,Aarsd1,Abcb5,Abcb7,Abcg1,Abhd6,Actr3b,Add2,Adra1d,Adrb1,Adrbk1,Afg3l2,Agr2,Agtpbp1,Ahr,Aifm3,Aldh5a1,Aldh9a1,Ankrd11,Ankrd13c,Apbb2,Apc,Apoa1,App,Aqp11,Aqp4,Arap1,Arap3,Arf1,Arf6,Arhgap5,Arl2bp,Arpc3,Arpc5,Aspm,Atp2a2,Atp6v0c,Atxn1,Bbs1,Bbs10,Bbs4,Bcan,Bcl2,Bcl2l11,Bhlha15,Bicd1,Bmpr1b,Bmpr2,Bnip3,Brsk1,Btrc,Bves,Cacna1b,Cacna1e,Cacng2,Calb1,Calca,Calcb,Capza2,Cbl,Ccdc109a,Ccnd…
GO Biological Process	GO:0070585	protein localization in mitochondrion	17	5.96e-05	0.511	0.0301	18	0.222	4	24	0.0889	0.167	1	9	30	unnamed,unnamed,unnamed,unnamed	unnamed,unnamed,unnamed,unnamed,unnamed,unnamed,unnamed,unnamed,unnamed,unnamed,unnamed,unnamed,unnamed,unnamed,unnamed,unnamed,unnamed,unnamed,unnamed,unnamed,unnamed,unnamed,unnamed,unnamed	2012-03-05	Hsp90aa1,Hspa4,Immp2l,March5,Mtx2,Mtx3,Samm50,Tomm20,Ywhaz
GO Biological Process	GO:0051444	negative regulation of ubiquitin-protein ligase activity	18	6e-05	0.515	0.0286	36	0.0833	3	9	0.0667	0.333	1	4	10	unnamed,unnamed,unnamed	unnamed,unnamed,unnamed,unnamed,unnamed,unnamed,unnamed,unnamed,unnamed	Limk1	Bag5,Limk1,Psen1,Usp44
GO Biological Process	GO:0051130	positive regulation of cellular component organization	19	0.000109	0.932	0.049	4.58	1.96	9	212	0.2	0.0425	4	85	371	unnamed,unnamed,unnamed,unnamed,unnamed,unnamed,unnamed,unnamed,unnamed	unnamed,unnamed,unnamed,unnamed,unnamed,unnamed,unnamed,unnamed,unnamed,unnamed,unnamed,unnamed,unnamed,unnamed,unnamed,unnamed,unnamed,unnamed,unnamed,unnamed,unnamed,unnamed,unnamed,unnamed,unnamed,unnamed,unnamed,unnamed,unnamed,unnamed,unnamed,unnamed,unnamed,unnamed,unnamed,unnamed,unnamed,unnamed,unnamed,unnamed,unnamed,unnamed,unnamed,unnamed,unnamed,unnamed,unnamed,unnamed,unnamed,unnamed…	Brca1,Limk1,March5,Nefl	2810002N01Rik,Ahr,Amph,Apc,Ar,Arap1,Arf6,Arrb1,Atf1,Axin2,Bbs4,Bcl2l11,Bcr,Bicd1,Bnip3,Brca1,Cand1,Cbll1,Cdc42ep4,Cdh4,Cdkn1b,Cfl1,Clip1,Ctnnb1,Cxcl13,Dlg1,Drd2,Dstn,Epb4.1l5,Fert2,Fez1,Ghrl,Gpr65,Itgb1,Jarid2,Jmy,Limk1,Lpin1,Lyn,March5,Mllt11,Mpp7,Mtap1b,Nck1,Nefl,Nkx2-5,Nlgn3,Nos1,Ntrk3,Numb,Nusap1,Pax2,Pax8,Paxip1,Pebp1,Pfn2,Pink1,Pld2,Plk4,Prkca,Ptk6,Rala,Rhoa,Rhog,Robo1,Rps6ka5,Sema4d,Shank3…
GO Biological Process	GO:0010720	positive regulation of cell development	20	0.000113	0.97	0.0485	7.62	0.787	6	85	0.133	0.0706	4	32	139	unnamed,unnamed,unnamed,unnamed,unnamed,unnamed	unnamed,unnamed,unnamed,unnamed,unnamed,unnamed,unnamed,unnamed,unnamed,unnamed,unnamed,unnamed,unnamed,unnamed,unnamed,unnamed,unnamed,unnamed,unnamed,unnamed,unnamed,unnamed,unnamed,unnamed,unnamed,unnamed,unnamed,unnamed,unnamed,unnamed,unnamed,unnamed,unnamed,unnamed,unnamed,unnamed,unnamed,unnamed,unnamed,unnamed,unnamed,unnamed,unnamed,unnamed,unnamed,unnamed,unnamed,unnamed,unnamed,unnamed…	Gfap,Il6st,Limk1,Nefl	Axin2,Bcl2,Cdh4,Ctnnb1,Drd2,Epb4.1l5,Etv5,Gfap,Grm5,Hes1,Hoxd11,Il6st,Limk1,Lyn,Meg3,Mtap1b,Nefl,Ntrk3,Numb,Pax2,Pax6,Pax8,Robo1,Sema4d,Shank3,Smad2,Smad4,Sox11,Stk11,Trim32,Tspo,Zfp703
GO Biological Process	GO:0071156	regulation of cell cycle arrest	21	0.000146	1	0.0595	9.64	0.519	5	56	0.111	0.0893	4	25	118	unnamed,unnamed,unnamed,unnamed,unnamed	unnamed,unnamed,unnamed,unnamed,unnamed,unnamed,unnamed,unnamed,unnamed,unnamed,unnamed,unnamed,unnamed,unnamed,unnamed,unnamed,unnamed,unnamed,unnamed,unnamed,unnamed,unnamed,unnamed,unnamed,unnamed,unnamed,unnamed,unnamed,unnamed,unnamed,unnamed,unnamed,unnamed,unnamed,unnamed,unnamed,unnamed,unnamed,unnamed,unnamed,unnamed,unnamed,unnamed,unnamed,unnamed,unnamed,unnamed,unnamed,unnamed,unnamed…	Brca1,Chfr,Mdm4,Tipin	Apc,Atm,B230120H23Rik,Brca1,Brsk1,Ccnd1,Chek1,Chfr,Clock,E2f1,Ercc3,Fbxo31,Foxo4,Gm5136,Ints7,Kras,Mdm4,Msh2,Pura,Rad9,Sox11,Taok3,Terf1,Tipin,Wac
GO Biological Process	GO:0045773	positive regulation of axon extension	22	0.000154	1	0.0601	27	0.111	3	12	0.0667	0.25	1	4	20	unnamed,unnamed,unnamed	unnamed,unnamed,unnamed,unnamed,unnamed,unnamed,unnamed,unnamed,unnamed,unnamed,unnamed,unnamed	Limk1	Cdh4,Limk1,Mtap1b,Ntrk3
GO Biological Process	GO:0006413	translational initiation	23	0.000199	1	0.0742	24.9	0.12	3	13	0.0667	0.231	1	8	66	unnamed,unnamed,unnamed	unnamed,unnamed,unnamed,unnamed,unnamed,unnamed,unnamed,unnamed,unnamed,unnamed,unnamed,unnamed,unnamed	Eif4h	Dhx29,Eif2c3,Eif3c,Eif3d,Eif4a2,Eif4g3,Eif4h,Mtfmt
GO Biological Process	GO:0051094	positive regulation of developmental process	24	0.000209	1	0.0748	3.79	2.64	10	285	0.222	0.0351	5	117	552	unnamed,unnamed,unnamed,unnamed,unnamed,unnamed,unnamed,unnamed,unnamed,unnamed	unnamed,unnamed,unnamed,unnamed,unnamed,unnamed,unnamed,unnamed,unnamed,unnamed,unnamed,unnamed,unnamed,unnamed,unnamed,unnamed,unnamed,unnamed,unnamed,unnamed,unnamed,unnamed,unnamed,unnamed,unnamed,unnamed,unnamed,unnamed,unnamed,unnamed,unnamed,unnamed,unnamed,unnamed,unnamed,unnamed,unnamed,unnamed,unnamed,unnamed,unnamed,unnamed,unnamed,unnamed,unnamed,unnamed,unnamed,unnamed,unnamed,unnamed…	Gfap,Il6st,Limk1,March5,Nefl	Adam8,Adrb1,Apc,Atoh1,Axin2,Bcl2,Bmp7,Bmpr1a,Bmpr1b,Bmpr2,Bnip3,C5ar1,C6,Cd276,Cd83,Cdh4,Cdon,Ctnnb1,Cx3cl1,Cyp26b1,Cyp27b1,Cyr61,Ddah1,Dlg1,Drd2,Epb4.1l5,Erap1,Etv5,Fez1,Fgf18,Fgf9,Fgfr3,Foxd1,Frs2,Frzb,Gfap,Ghrl,Gm614,Grm5,Hes1,Heyl,Hmgcr,Hoxd11,Hoxd3,Hsp90aa1,Id4,Il6st,Itgb1,Junb,Lep,Limk1,Lpl,Lyn,Maml1,Mapk8,Mapk9,March5,Meg3,Mkl2,Mll5,Msr1,Mtap1b,Nbl1,Nefl,Nkx2-5,Nlgn3,Notch2,Nppc,Nrg1,Ntrk3…
GO Biological Process	GO:0051438	regulation of ubiquitin-protein ligase activity	25	0.000252	1	0.0863	23.1	0.13	3	14	0.0667	0.214	1	7	28	unnamed,unnamed,unnamed	unnamed,unnamed,unnamed,unnamed,unnamed,unnamed,unnamed,unnamed,unnamed,unnamed,unnamed,unnamed,unnamed,unnamed	Limk1	Bag5,Limk1,Pin1,Psen1,Trib2,Ube2n,Usp44
GO Biological Process	GO:0051340	regulation of ligase activity	26	0.000312	1	0.103	21.6	0.139	3	15	0.0667	0.2	1	8	31	unnamed,unnamed,unnamed	unnamed,unnamed,unnamed,unnamed,unnamed,unnamed,unnamed,unnamed,unnamed,unnamed,unnamed,unnamed,unnamed,unnamed,unnamed	Limk1	Bag5,Gclm,Limk1,Pin1,Psen1,Trib2,Ube2n,Usp44
GO Biological Process	GO:0033043	regulation of organelle organization	27	0.000337	1	0.107	4.45	1.8	8	194	0.178	0.0412	3	78	337	unnamed,unnamed,unnamed,unnamed,unnamed,unnamed,unnamed,unnamed	unnamed,unnamed,unnamed,unnamed,unnamed,unnamed,unnamed,unnamed,unnamed,unnamed,unnamed,unnamed,unnamed,unnamed,unnamed,unnamed,unnamed,unnamed,unnamed,unnamed,unnamed,unnamed,unnamed,unnamed,unnamed,unnamed,unnamed,unnamed,unnamed,unnamed,unnamed,unnamed,unnamed,unnamed,unnamed,unnamed,unnamed,unnamed,unnamed,unnamed,unnamed,unnamed,unnamed,unnamed,unnamed,unnamed,unnamed,unnamed,unnamed,unnamed…	Brca1,Limk1,March5	2810002N01Rik,Actr3b,Add2,Apc,Arap1,Arf6,Arhgef2,Arpc3,Arpc5,Arrb1,Atm,Axin2,Bcl2l11,Bmp7,Bnip3,Brca1,Capn6,Capza2,Cdc6,Cdk5r1,Cdk5rap2,Cdkn1b,Cfl1,Chek1,Chordc1,Clip1,Crk,Ctnnb1,Cyld,Dlg1,Dstn,Efna5,Epha5,Fert2,Fgfr3,Golph3,Gpr65,Jarid2,Jmy,Limk1,Lpin1,Mapk8,March5,Mllt11,Mtap1b,Mtm1,Nck1,Nek2,Nexn,Nos1,Nusap1,Pak3,Paxip1,Pebp1,Pfn2,Pink1,Plk4,Rasa1,Rhoa,Rps6ka5,Slit2,Spna2,Ssh1,Ssh2,Stmn2,Synpo…
GO Biological Process	GO:0031346	positive regulation of cell projection organization	28	0.00046	1	0.141	10.8	0.37	4	40	0.0889	0.1	2	20	110	unnamed,unnamed,unnamed,unnamed	unnamed,unnamed,unnamed,unnamed,unnamed,unnamed,unnamed,unnamed,unnamed,unnamed,unnamed,unnamed,unnamed,unnamed,unnamed,unnamed,unnamed,unnamed,unnamed,unnamed,unnamed,unnamed,unnamed,unnamed,unnamed,unnamed,unnamed,unnamed,unnamed,unnamed,unnamed,unnamed,unnamed,unnamed,unnamed,unnamed,unnamed,unnamed,unnamed,unnamed	Limk1,Nefl	Apc,Arap1,Atf1,Bbs4,Cdc42ep4,Cdh4,Fez1,Itgb1,Limk1,Lyn,Mtap1b,Nefl,Ntrk3,Numb,Ptk6,Rala,Robo1,Sema4d,Stk11,Stmn2
GO Biological Process	GO:0051248	negative regulation of protein metabolic process	29	0.000648	1	0.192	5.54	1.08	6	117	0.133	0.0513	4	45	211	unnamed,unnamed,unnamed,unnamed,unnamed,unnamed	unnamed,unnamed,unnamed,unnamed,unnamed,unnamed,unnamed,unnamed,unnamed,unnamed,unnamed,unnamed,unnamed,unnamed,unnamed,unnamed,unnamed,unnamed,unnamed,unnamed,unnamed,unnamed,unnamed,unnamed,unnamed,unnamed,unnamed,unnamed,unnamed,unnamed,unnamed,unnamed,unnamed,unnamed,unnamed,unnamed,unnamed,unnamed,unnamed,unnamed,unnamed,unnamed,unnamed,unnamed,unnamed,unnamed,unnamed,unnamed,unnamed,unnamed…	Brca1,Gipc1,Limk1,Mdm4	Apom,Arrb1,Bag5,Brca1,Cd276,Cd46,Eif2c1,Eif2c2,Eif2c3,Eif4ebp2,Fam129a,Fkbp1a,Fyn,Gclc,Ghrl,Gipc1,Grin2a,Grin2c,Gtpbp4,Ireb2,Irf1,Itgav,Jarid2,Limk1,Lrp6,Mdm4,N4bp1,Ndufa13,Pebp1,Prkca,Psen1,Ptpn3,Rasd2,Samd4,Samsn1,Serping1,Sh2d1b1,Slit2,Smad4,Timp3,Tnrc6a,Trib2,Ube2b,Usp44,Ywhae
GO Biological Process	GO:0032233	positive regulation of actin filament bundle assembly	30	0.000648	1	0.185	17.1	0.176	3	19	0.0667	0.158	1	7	20	unnamed,unnamed,unnamed	unnamed,unnamed,unnamed,unnamed,unnamed,unnamed,unnamed,unnamed,unnamed,unnamed,unnamed,unnamed,unnamed,unnamed,unnamed,unnamed,unnamed,unnamed,unnamed	Limk1	Gpr65,Limk1,Rhoa,Synpo,Tac1,Vil1,Wnt11
GO Biological Process	GO:0032231	regulation of actin filament bundle assembly	31	0.000758	1	0.21	16.2	0.185	3	20	0.0667	0.15	1	8	28	unnamed,unnamed,unnamed	unnamed,unnamed,unnamed,unnamed,unnamed,unnamed,unnamed,unnamed,unnamed,unnamed,unnamed,unnamed,unnamed,unnamed,unnamed,unnamed,unnamed,unnamed,unnamed,unnamed	Limk1	Arap1,Gpr65,Limk1,Rhoa,Synpo,Tac1,Vil1,Wnt11
GO Biological Process	GO:0031397	negative regulation of protein ubiquitination	32	0.000878	1	0.236	15.4	0.194	3	21	0.0667	0.143	1	9	28	unnamed,unnamed,unnamed	unnamed,unnamed,unnamed,unnamed,unnamed,unnamed,unnamed,unnamed,unnamed,unnamed,unnamed,unnamed,unnamed,unnamed,unnamed,unnamed,unnamed,unnamed,unnamed,unnamed,unnamed	Limk1	Arrb1,Bag5,Gclc,Gtpbp4,Limk1,N4bp1,Psen1,Rasd2,Usp44
GO Biological Process	GO:0031396	regulation of protein ubiquitination	33	0.001	1	0.261	8.82	0.454	4	49	0.0889	0.0816	2	25	89	unnamed,unnamed,unnamed,unnamed	unnamed,unnamed,unnamed,unnamed,unnamed,unnamed,unnamed,unnamed,unnamed,unnamed,unnamed,unnamed,unnamed,unnamed,unnamed,unnamed,unnamed,unnamed,unnamed,unnamed,unnamed,unnamed,unnamed,unnamed,unnamed,unnamed,unnamed,unnamed,unnamed,unnamed,unnamed,unnamed,unnamed,unnamed,unnamed,unnamed,unnamed,unnamed,unnamed,unnamed,unnamed,unnamed,unnamed,unnamed,unnamed,unnamed,unnamed,unnamed,unnamed	Brca1,Limk1	Arrb1,Atg7,Bag5,Bcl10,Brca1,Fbxo2,Fgfr3,Gclc,Gtpbp4,Limk1,N4bp1,Ndfip1,Paxip1,Pin1,Pink1,Psen1,Rasd2,Rchy1,Sphk1,Stub1,Tbc1d7,Trib2,Ube2n,Usp44,Wfs1
GO Biological Process	GO:0016567	protein ubiquitination	34	0.00103	1	0.259	4.3	1.63	7	176	0.156	0.0398	3	74	273	unnamed,unnamed,unnamed,unnamed,unnamed,unnamed,unnamed	unnamed,unnamed,unnamed,unnamed,unnamed,unnamed,unnamed,unnamed,unnamed,unnamed,unnamed,unnamed,unnamed,unnamed,unnamed,unnamed,unnamed,unnamed,unnamed,unnamed,unnamed,unnamed,unnamed,unnamed,unnamed,unnamed,unnamed,unnamed,unnamed,unnamed,unnamed,unnamed,unnamed,unnamed,unnamed,unnamed,unnamed,unnamed,unnamed,unnamed,unnamed,unnamed,unnamed,unnamed,unnamed,unnamed,unnamed,unnamed,unnamed,unnamed…	Brca1,Chfr,March5	Anapc1,Anapc16,Anapc7,Arih1,Arrb1,Bcl2,Brca1,Btrc,Cand1,Cbl,Cblb,Cbll1,Chfr,Cul1,Cul3,Cyhr1,Fbxo2,Fbxo30,Fbxo40,Fbxw11,Gm2058,Hace1,Hecw2,Kctd10,March5,Nedd4l,Nub1,Os9,Paf1,Pcnp,Pdzrn3,Rbbp6,Rbck1,Rchy1,Rnf11,Rnf130,Rnf144b,Rnf152,Rnf167,Rnf168,Rnf182,Rnf20,Siah1a,Skp1a,Stub1,Tnk2,Tnks,Tnks2,Traf3,Traf4,Traf5,Trim23,Trim25,Trim32,Trim8,Ube2a,Ube2b,Ube2c,Ube2d3,Ube2e3,Ube2k,Ube2m,Ube2n,Ube2ql1,Ube…
GO Biological Process	GO:0048639	positive regulation of developmental growth	35	0.00115	1	0.283	14.1	0.213	3	23	0.0667	0.13	1	9	36	unnamed,unnamed,unnamed	unnamed,unnamed,unnamed,unnamed,unnamed,unnamed,unnamed,unnamed,unnamed,unnamed,unnamed,unnamed,unnamed,unnamed,unnamed,unnamed,unnamed,unnamed,unnamed,unnamed,unnamed,unnamed,unnamed	Limk1	Adrb1,Cdh4,Dlg1,Lep,Limk1,Mtap1b,Ntrk3,Plcb1,Rps6kb1
GO Biological Process	GO:0032446	protein modification by small protein conjugation	36	0.00137	1	0.328	4.09	1.71	7	185	0.156	0.0378	3	79	295	unnamed,unnamed,unnamed,unnamed,unnamed,unnamed,unnamed	unnamed,unnamed,unnamed,unnamed,unnamed,unnamed,unnamed,unnamed,unnamed,unnamed,unnamed,unnamed,unnamed,unnamed,unnamed,unnamed,unnamed,unnamed,unnamed,unnamed,unnamed,unnamed,unnamed,unnamed,unnamed,unnamed,unnamed,unnamed,unnamed,unnamed,unnamed,unnamed,unnamed,unnamed,unnamed,unnamed,unnamed,unnamed,unnamed,unnamed,unnamed,unnamed,unnamed,unnamed,unnamed,unnamed,unnamed,unnamed,unnamed,unnamed…	Brca1,Chfr,March5	Anapc1,Anapc16,Anapc7,Arih1,Arrb1,Atg7,Bcl2,Brca1,Btrc,Cand1,Cbl,Cblb,Cbll1,Chfr,Cul1,Cul3,Cyhr1,Fbxo2,Fbxo30,Fbxo40,Fbxw11,Gm2058,Hace1,Hecw2,Kctd10,March5,Nedd4l,Nedd8,Nub1,Os9,Paf1,Pcnp,Pdzrn3,Pias2,Pias4,Rbbp6,Rbck1,Rchy1,Rnf11,Rnf130,Rnf144b,Rnf152,Rnf167,Rnf168,Rnf182,Rnf20,Siah1a,Skp1a,Stub1,Tnk2,Tnks,Tnks2,Traf3,Traf4,Traf5,Trim23,Trim25,Trim32,Trim8,Ube2a,Ube2b,Ube2c,Ube2d3,Ube2e3,Ube2k,…
GO Biological Process	GO:0031400	negative regulation of protein modification process	37	0.00145	1	0.336	8	0.5	4	54	0.0889	0.0741	2	22	109	unnamed,unnamed,unnamed,unnamed	unnamed,unnamed,unnamed,unnamed,unnamed,unnamed,unnamed,unnamed,unnamed,unnamed,unnamed,unnamed,unnamed,unnamed,unnamed,unnamed,unnamed,unnamed,unnamed,unnamed,unnamed,unnamed,unnamed,unnamed,unnamed,unnamed,unnamed,unnamed,unnamed,unnamed,unnamed,unnamed,unnamed,unnamed,unnamed,unnamed,unnamed,unnamed,unnamed,unnamed,unnamed,unnamed,unnamed,unnamed,unnamed,unnamed,unnamed,unnamed,unnamed,unnamed…	Brca1,Limk1	Arrb1,Bag5,Brca1,Fam129a,Fkbp1a,Gclc,Gtpbp4,Irf1,Jarid2,Limk1,Lrp6,N4bp1,Pebp1,Prkca,Psen1,Rasd2,Samsn1,Sh2d1b1,Slit2,Ube2b,Usp44,Ywhae
GO Biological Process	GO:0000075	cell cycle checkpoint	38	0.00155	1	0.35	7.85	0.509	4	55	0.0889	0.0727	3	24	105	unnamed,unnamed,unnamed,unnamed	unnamed,unnamed,unnamed,unnamed,unnamed,unnamed,unnamed,unnamed,unnamed,unnamed,unnamed,unnamed,unnamed,unnamed,unnamed,unnamed,unnamed,unnamed,unnamed,unnamed,unnamed,unnamed,unnamed,unnamed,unnamed,unnamed,unnamed,unnamed,unnamed,unnamed,unnamed,unnamed,unnamed,unnamed,unnamed,unnamed,unnamed,unnamed,unnamed,unnamed,unnamed,unnamed,unnamed,unnamed,unnamed,unnamed,unnamed,unnamed,unnamed,unnamed…	Brca1,Chfr,Tipin	Apc,Atm,B230120H23Rik,Brca1,Brsk1,Ccnd1,Chek1,Chfr,Clock,E2f1,Ercc3,Fbxo31,Foxo4,Gm5136,Ints7,Kras,Msh2,Pura,Rad9,Sox11,Taok3,Terf1,Tipin,Wac
GO Biological Process	GO:0032269	negative regulation of cellular protein metabolic process	39	0.00161	1	0.355	5.74	0.87	5	94	0.111	0.0532	3	35	180	unnamed,unnamed,unnamed,unnamed,unnamed	unnamed,unnamed,unnamed,unnamed,unnamed,unnamed,unnamed,unnamed,unnamed,unnamed,unnamed,unnamed,unnamed,unnamed,unnamed,unnamed,unnamed,unnamed,unnamed,unnamed,unnamed,unnamed,unnamed,unnamed,unnamed,unnamed,unnamed,unnamed,unnamed,unnamed,unnamed,unnamed,unnamed,unnamed,unnamed,unnamed,unnamed,unnamed,unnamed,unnamed,unnamed,unnamed,unnamed,unnamed,unnamed,unnamed,unnamed,unnamed,unnamed,unnamed…	Brca1,Gipc1,Limk1	Apom,Arrb1,Bag5,Brca1,Eif2c1,Eif2c2,Eif2c3,Eif4ebp2,Fam129a,Fkbp1a,Gclc,Gipc1,Gtpbp4,Ireb2,Irf1,Itgav,Jarid2,Limk1,Lrp6,N4bp1,Ndufa13,Pebp1,Prkca,Psen1,Ptpn3,Rasd2,Samd4,Samsn1,Sh2d1b1,Slit2,Timp3,Tnrc6a,Ube2b,Usp44,Ywhae
GO Biological Process	GO:0015980	energy derivation by oxidation of organic compounds	40	0.00288	1	0.618	6.65	0.602	4	65	0.0889	0.0615	4	31	123	unnamed,unnamed,unnamed,unnamed	unnamed,unnamed,unnamed,unnamed,unnamed,unnamed,unnamed,unnamed,unnamed,unnamed,unnamed,unnamed,unnamed,unnamed,unnamed,unnamed,unnamed,unnamed,unnamed,unnamed,unnamed,unnamed,unnamed,unnamed,unnamed,unnamed,unnamed,unnamed,unnamed,unnamed,unnamed,unnamed,unnamed,unnamed,unnamed,unnamed,unnamed,unnamed,unnamed,unnamed,unnamed,unnamed,unnamed,unnamed,unnamed,unnamed,unnamed,unnamed,unnamed,unnamed…	Il6st,Ogdhl,S100b,mt-Nd4	4933405O20Rik,Adrb1,Akt2,Aldh5a1,Cox10,Cps1,Dld,Epm2a,Fastkd2,Fh1,G6pc,Gnmt,Got1,Il6st,Lep,Ncaph2,Ndufs1,Ndufs4,Ogdhl,Oxa1l,Phkb,Ppargc1a,Ppp1cb,Ppp1r3e,Ppp3r2,S100b,Slc25a12,Slc25a13,Tymp,Uqcr10,mt-Nd4
GO Biological Process	GO:0022603	regulation of anatomical structure morphogenesis	41	0.00313	1	0.655	3.16	2.53	8	273	0.178	0.0293	4	103	465	unnamed,unnamed,unnamed,unnamed,unnamed,unnamed,unnamed,unnamed	unnamed,unnamed,unnamed,unnamed,unnamed,unnamed,unnamed,unnamed,unnamed,unnamed,unnamed,unnamed,unnamed,unnamed,unnamed,unnamed,unnamed,unnamed,unnamed,unnamed,unnamed,unnamed,unnamed,unnamed,unnamed,unnamed,unnamed,unnamed,unnamed,unnamed,unnamed,unnamed,unnamed,unnamed,unnamed,unnamed,unnamed,unnamed,unnamed,unnamed,unnamed,unnamed,unnamed,unnamed,unnamed,unnamed,unnamed,unnamed,unnamed,unnamed…	Limk1,March5,Nefl,Nefm	Apc,Ar,Arap1,Arap3,Axin2,Bcl2,Bhlhe23,Bmp7,Bmpr1a,Bnip3,Bves,C5ar1,C6,Camsap1,Cdc42ep4,Cdc42se1,Cdh4,Cdk5r1,Cfl1,Chn1,Cit,Cntn2,Crhr2,Cthrc1,Ctnnb1,Cx3cl1,Cyfip1,Ddah1,Efna1,Epb4.1l5,Erap1,Etv4,Etv5,Fasl,Fitm2,Fmnl2,Fn1,Foxo4,Frs2,Fyn,Gna12,Gpr124,Grin1,Grlf1,Hes1,Hgf,Lect1,Limk1,Lrp6,Lzts1,March5,Meg3,Mtap1b,Myl12b,Nefl,Nefm,Nfib,Nodal,Nrp1,Ntn4,Ntrk3,Numb,Osr1,Pax2,Pax8,Pdgfa,Pdlim5,Plxna4,Ppp2…
GO Biological Process	GO:0045109	intermediate filament organization	42	0.0036	1	0.735	21.6	0.0926	2	10	0.0444	0.2	2	4	11	unnamed,unnamed	unnamed,unnamed,unnamed,unnamed,unnamed,unnamed,unnamed,unnamed,unnamed,unnamed	Gfap,Nefl	Agfg1,Gfap,Mtm1,Nefl
GO Biological Process	GO:0014015	positive regulation of gliogenesis	42	0.0036	1	0.735	21.6	0.0926	2	10	0.0444	0.2	2	6	31	unnamed,unnamed	unnamed,unnamed,unnamed,unnamed,unnamed,unnamed,unnamed,unnamed,unnamed,unnamed	Gfap,Il6st	Etv5,Gfap,Hes1,Il6st,Lyn,Tspo
GO Biological Process	GO:0070647	protein modification by small protein conjugation or removal	44	0.0036	1	0.702	3.45	2.03	7	219	0.156	0.032	3	96	351	unnamed,unnamed,unnamed,unnamed,unnamed,unnamed,unnamed	unnamed,unnamed,unnamed,unnamed,unnamed,unnamed,unnamed,unnamed,unnamed,unnamed,unnamed,unnamed,unnamed,unnamed,unnamed,unnamed,unnamed,unnamed,unnamed,unnamed,unnamed,unnamed,unnamed,unnamed,unnamed,unnamed,unnamed,unnamed,unnamed,unnamed,unnamed,unnamed,unnamed,unnamed,unnamed,unnamed,unnamed,unnamed,unnamed,unnamed,unnamed,unnamed,unnamed,unnamed,unnamed,unnamed,unnamed,unnamed,unnamed,unnamed…	Brca1,Chfr,March5	Anapc1,Anapc16,Anapc7,Arih1,Arrb1,Atg7,Atxn3,Bcl2,Brca1,Btrc,Cand1,Cbl,Cblb,Cbll1,Chfr,Cops5,Cops6,Cops7b,Cul1,Cul3,Cyhr1,Cyld,Fbxo2,Fbxo30,Fbxo40,Fbxw11,Gm2058,Gm5136,Hace1,Hecw2,Josd2,Kat2a,Kctd10,March5,Nedd4l,Nedd8,Nub1,Os9,Paf1,Pcnp,Pdzrn3,Pias2,Pias4,Rbbp6,Rbck1,Rchy1,Rnf11,Rnf130,Rnf144b,Rnf152,Rnf167,Rnf168,Rnf182,Rnf20,Senp2,Siah1a,Skp1a,Stub1,Tnk2,Tnks,Tnks2,Traf3,Traf4,Traf5,Trim23,Tri…
GO Biological Process	GO:0030516	regulation of axon extension	45	0.00395	1	0.753	9.26	0.324	3	35	0.0667	0.0857	1	10	36	unnamed,unnamed,unnamed	unnamed,unnamed,unnamed,unnamed,unnamed,unnamed,unnamed,unnamed,unnamed,unnamed,unnamed,unnamed,unnamed,unnamed,unnamed,unnamed,unnamed,unnamed,unnamed,unnamed,unnamed,unnamed,unnamed,unnamed,unnamed,unnamed,unnamed,unnamed,unnamed,unnamed,unnamed,unnamed,unnamed,unnamed,unnamed	Limk1	Cdh4,Limk1,Mtap1b,Nrp1,Ntrk3,Plxna4,Sema3a,Slit1,Tnr,Ttl
GO Biological Process	GO:0048523	negative regulation of cellular process	46	0.00431	1	0.804	1.83	9.81	18	1060	0.4	0.017	13	458	2107	unnamed,unnamed,unnamed,unnamed,unnamed,unnamed,unnamed,unnamed,unnamed,unnamed,unnamed,unnamed,unnamed,unnamed,unnamed,unnamed,unnamed,unnamed	unnamed,unnamed,unnamed,unnamed,unnamed,unnamed,unnamed,unnamed,unnamed,unnamed,unnamed,unnamed,unnamed,unnamed,unnamed,unnamed,unnamed,unnamed,unnamed,unnamed,unnamed,unnamed,unnamed,unnamed,unnamed,unnamed,unnamed,unnamed,unnamed,unnamed,unnamed,unnamed,unnamed,unnamed,unnamed,unnamed,unnamed,unnamed,unnamed,unnamed,unnamed,unnamed,unnamed,unnamed,unnamed,unnamed,unnamed,unnamed,unnamed,unnamed…	Brca1,Dach1,Dusp1,Gfap,Gipc1,Hspa1b,Il6st,Limk1,March5,Mdm4,Nefl,Sncb,Tipin	1500015O10Rik,4632434I11Rik,AK028549,Abcg1,Abhd2,Abhd6,Acan,Adam17,Adam8,Adar,Add2,Adnp2,Adrbk1,Aes,Agap2,Ahr,Akt2,Apbb2,Apc,Apoa1,Apom,App,Ar,Arap1,Arap3,Arhgap10,Arhgef2,Arnt2,Arrb1,Asns,Aspm,Atf3,Atg7,Atm,Atxn1,Aven,Axin2,B230120H23Rik,B4galt7,Bag1,Bag3,Bag5,Bahd1,Barhl1,Basp1,Bcl10,Bcl2,Bcl2l10,Bcr,Bhlhe23,Bhlhe41,Bmp7,Bmpr1a,Bmpr2,Bnip3,Braf,Brca1,Btrc,Calca,Capza2,Cbl,Cblb,Cbll1,Ccnd1,Cd276…
GO Biological Process	GO:0031102	neuron projection regeneration	47	0.00437	1	0.799	19.6	0.102	2	11	0.0444	0.182	2	5	22	unnamed,unnamed	unnamed,unnamed,unnamed,unnamed,unnamed,unnamed,unnamed,unnamed,unnamed,unnamed,unnamed	Gfap,Nefl	Bcl2,Gfap,Mtap1b,Nefl,Tspo
GO Biological Process	GO:0050770	regulation of axonogenesis	48	0.0046	1	0.823	5.84	0.685	4	74	0.0889	0.0541	3	26	85	unnamed,unnamed,unnamed,unnamed	unnamed,unnamed,unnamed,unnamed,unnamed,unnamed,unnamed,unnamed,unnamed,unnamed,unnamed,unnamed,unnamed,unnamed,unnamed,unnamed,unnamed,unnamed,unnamed,unnamed,unnamed,unnamed,unnamed,unnamed,unnamed,unnamed,unnamed,unnamed,unnamed,unnamed,unnamed,unnamed,unnamed,unnamed,unnamed,unnamed,unnamed,unnamed,unnamed,unnamed,unnamed,unnamed,unnamed,unnamed,unnamed,unnamed,unnamed,unnamed,unnamed,unnamed…	Limk1,Nefl,Nefm	Cdh4,Chn1,Cntn2,Efna1,Grin1,Limk1,Mtap1b,Nefl,Nefm,Nrp1,Ntrk3,Plxna4,Psen1,Robo1,Sema3a,Sema4d,Sipa1l1,Slit1,Slit2,Spp1,Ssh1,Ssh2,Stk11,Tnr,Ttl,Ulk2
GO Biological Process	GO:0030307	positive regulation of cell growth	49	0.00463	1	0.81	8.76	0.343	3	37	0.0667	0.0811	1	17	75	unnamed,unnamed,unnamed	unnamed,unnamed,unnamed,unnamed,unnamed,unnamed,unnamed,unnamed,unnamed,unnamed,unnamed,unnamed,unnamed,unnamed,unnamed,unnamed,unnamed,unnamed,unnamed,unnamed,unnamed,unnamed,unnamed,unnamed,unnamed,unnamed,unnamed,unnamed,unnamed,unnamed,unnamed,unnamed,unnamed,unnamed,unnamed,unnamed,unnamed	Limk1	Adam17,Adnp2,Adrb1,Bcl2,Cdh4,Extl3,Ino80,Limk1,Mtap1b,Ntrk3,Sfn,Sphk1,Supv3l1,Tgfb2,Trim32,Ucn,Usp47
GO Biological Process	GO:0010975	regulation of neuron projection development	50	0.00468	1	0.804	4.5	1.11	5	120	0.111	0.0417	4	48	174	unnamed,unnamed,unnamed,unnamed,unnamed	unnamed,unnamed,unnamed,unnamed,unnamed,unnamed,unnamed,unnamed,unnamed,unnamed,unnamed,unnamed,unnamed,unnamed,unnamed,unnamed,unnamed,unnamed,unnamed,unnamed,unnamed,unnamed,unnamed,unnamed,unnamed,unnamed,unnamed,unnamed,unnamed,unnamed,unnamed,unnamed,unnamed,unnamed,unnamed,unnamed,unnamed,unnamed,unnamed,unnamed,unnamed,unnamed,unnamed,unnamed,unnamed,unnamed,unnamed,unnamed,unnamed,unnamed…	Gfap,Limk1,Nefl,Nefm	Arf6,Atf1,Cdh4,Cdk5r1,Chn1,Cit,Cntn2,D130043K22Rik,Efna1,Fez1,Gfap,Grin1,Itgb1,Itm2c,Limk1,Lyn,Lzts1,Mtap1b,Ncs1,Nefl,Nefm,Nrp1,Ntm,Ntrk2,Ntrk3,Numb,Pdlim5,Plxna4,Pmp22,Psen1,Ptk6,Rapgef4,Robo1,Sema3a,Sema4d,Sipa1l1,Slit1,Slit2,Spp1,Ssh1,Ssh2,Stk11,Stmn2,Tnik,Tnr,Ttl,Ulk2,Ywhah
GO Biological Process	GO:0048873	homeostasis of number of cells within a tissue	51	0.00522	1	0.878	18	0.111	2	12	0.0444	0.167	1	5	22	unnamed,unnamed	unnamed,unnamed,unnamed,unnamed,unnamed,unnamed,unnamed,unnamed,unnamed,unnamed,unnamed,unnamed	Cd7	Bcl2,Cd7,Fh1,Klhl10,Sash3
GO Biological Process	GO:0010564	regulation of cell cycle process	52	0.00557	1	0.919	4.32	1.16	5	125	0.111	0.04	4	55	253	unnamed,unnamed,unnamed,unnamed,unnamed	unnamed,unnamed,unnamed,unnamed,unnamed,unnamed,unnamed,unnamed,unnamed,unnamed,unnamed,unnamed,unnamed,unnamed,unnamed,unnamed,unnamed,unnamed,unnamed,unnamed,unnamed,unnamed,unnamed,unnamed,unnamed,unnamed,unnamed,unnamed,unnamed,unnamed,unnamed,unnamed,unnamed,unnamed,unnamed,unnamed,unnamed,unnamed,unnamed,unnamed,unnamed,unnamed,unnamed,unnamed,unnamed,unnamed,unnamed,unnamed,unnamed,unnamed…	Brca1,Chfr,Mdm4,Tipin	Apbb2,Apc,Atm,Axin2,B230120H23Rik,Bmp7,Brca1,Brd4,Brsk1,Ccnd1,Cdc6,Cdk5rap2,Chek1,Chfr,Chordc1,Clock,Crebbp,Cspp1,Ctgf,Ctnnb1,Cul4b,E2f1,Ercc3,Fbxo31,Fgfr3,Foxo4,Gm5136,Gpr3,Ino80,Ints7,Kras,Mdm4,Msh2,Myo16,Nanos2,Nusap1,Pebp1,Plcb1,Plk4,Pura,Rad9,Rhoa,Sox11,Taok3,Terf1,Tgfa,Tipin,Ube2b,Ube2c,Usp44,Usp47,Wac,Wapal,Ywhah,Zc3h12d
GO Biological Process	GO:0051128	regulation of cellular component organization	53	0.0056	1	0.907	2.33	4.72	11	510	0.244	0.0216	7	215	921	unnamed,unnamed,unnamed,unnamed,unnamed,unnamed,unnamed,unnamed,unnamed,unnamed,unnamed	unnamed,unnamed,unnamed,unnamed,unnamed,unnamed,unnamed,unnamed,unnamed,unnamed,unnamed,unnamed,unnamed,unnamed,unnamed,unnamed,unnamed,unnamed,unnamed,unnamed,unnamed,unnamed,unnamed,unnamed,unnamed,unnamed,unnamed,unnamed,unnamed,unnamed,unnamed,unnamed,unnamed,unnamed,unnamed,unnamed,unnamed,unnamed,unnamed,unnamed,unnamed,unnamed,unnamed,unnamed,unnamed,unnamed,unnamed,unnamed,unnamed,unnamed…	Brca1,Gfap,Hspa1b,Limk1,March5,Nefl,Nefm	2810002N01Rik,Actr3b,Adam17,Add2,Adnp2,Adrb1,Ahr,Amph,Apbb2,Apc,Apoa1,Appl1,Ar,Arap1,Arap3,Arf6,Arhgef2,Arpc3,Arpc5,Arrb1,Atf1,Atm,Axin2,Bag5,Bbs4,Bcl2,Bcl2l11,Bcr,Bicd1,Bmp7,Bmpr2,Bnip3,Brca1,Bves,Camsap1,Cand1,Capn6,Capza2,Cbll1,Cda,Cdc42ep4,Cdc42se1,Cdc6,Cdh4,Cdk5r1,Cdk5rap2,Cdkn1b,Cfl1,Chek1,Chn1,Chordc1,Cit,Clip1,Cntn2,Crim1,Crk,Ctgf,Ctnnb1,Cxcl13,Cyfip1,Cyld,Cyp27b1,Cyr61,D130043K22Rik,Dab2…
GO Biological Process	GO:0061387	regulation of extent of cell growth	54	0.00803	1	1	7.2	0.417	3	45	0.0667	0.0667	1	12	41	unnamed,unnamed,unnamed	unnamed,unnamed,unnamed,unnamed,unnamed,unnamed,unnamed,unnamed,unnamed,unnamed,unnamed,unnamed,unnamed,unnamed,unnamed,unnamed,unnamed,unnamed,unnamed,unnamed,unnamed,unnamed,unnamed,unnamed,unnamed,unnamed,unnamed,unnamed,unnamed,unnamed,unnamed,unnamed,unnamed,unnamed,unnamed,unnamed,unnamed,unnamed,unnamed,unnamed,unnamed,unnamed,unnamed,unnamed,unnamed	Limk1	Cdh4,Limk1,Mtap1b,Nrp1,Ntrk3,Plxna4,Sema3a,Slit1,Spp1,Tnr,Ttl,Ulk2
GO Biological Process	GO:0016079	synaptic vesicle exocytosis	55	0.00815	1	1	14.4	0.139	2	15	0.0444	0.133	1	6	25	unnamed,unnamed	unnamed,unnamed,unnamed,unnamed,unnamed,unnamed,unnamed,unnamed,unnamed,unnamed,unnamed,unnamed,unnamed,unnamed,unnamed	Cplx1	Cplx1,Cplx2,Pclo,Psen1,Stx4a,Unc13a
GO Biological Process	GO:0031344	regulation of cell projection organization	56	0.00894	1	1	3.86	1.3	5	140	0.111	0.0357	4	57	209	unnamed,unnamed,unnamed,unnamed,unnamed	unnamed,unnamed,unnamed,unnamed,unnamed,unnamed,unnamed,unnamed,unnamed,unnamed,unnamed,unnamed,unnamed,unnamed,unnamed,unnamed,unnamed,unnamed,unnamed,unnamed,unnamed,unnamed,unnamed,unnamed,unnamed,unnamed,unnamed,unnamed,unnamed,unnamed,unnamed,unnamed,unnamed,unnamed,unnamed,unnamed,unnamed,unnamed,unnamed,unnamed,unnamed,unnamed,unnamed,unnamed,unnamed,unnamed,unnamed,unnamed,unnamed,unnamed…	Gfap,Limk1,Nefl,Nefm	Apc,Arap1,Arf6,Atf1,Bbs4,Cdc42ep4,Cdh4,Cdk5r1,Chn1,Cit,Cntn2,D130043K22Rik,Efna1,Fert2,Fez1,Gfap,Grin1,Itgb1,Itm2c,Limk1,Lyn,Lzts1,Mtap1b,Ncs1,Nefl,Nefm,Nrp1,Ntm,Ntrk2,Ntrk3,Numb,Pdlim5,Plxna4,Pmp22,Podxl,Ppp1r16b,Psen1,Ptk6,Rala,Rapgef4,Robo1,Sema3a,Sema4d,Sipa1l1,Slit1,Slit2,Spp1,Ssh1,Ssh2,Stk11,Stmn2,Tnik,Tnr,Ttl,Ulk2,Vil1,Ywhah
GO Biological Process	GO:0051573	negative regulation of histone H3-K9 methylation	57	0.00926	1	1	108	0.00926	1	1	0.0222	1	1	1	4	unnamed	unnamed	Brca1	Brca1
GO Biological Process	GO:0070389	chaperone cofactor-dependent protein refolding	57	0.00926	1	1	108	0.00926	1	1	0.0222	1	1	1	4	unnamed	unnamed	Dnajb1	Dnajb1
GO Biological Process	GO:0060244	negative regulation of cell proliferation involved in contact inhibition	57	0.00926	1	1	108	0.00926	1	1	0.0222	1	1	1	1	unnamed	unnamed	Dach1	Dach1
GO Biological Process	GO:0060020	Bergmann glial cell differentiation	57	0.00926	1	1	108	0.00926	1	1	0.0222	1	1	1	3	unnamed	unnamed	Gfap	Gfap
GO Biological Process	GO:0070512	positive regulation of histone H4-K20 methylation	57	0.00926	1	1	108	0.00926	1	1	0.0222	1	1	1	1	unnamed	unnamed	Brca1	Brca1
GO Biological Process	GO:0071158	positive regulation of cell cycle arrest	57	0.00926	1	1	108	0.00926	1	1	0.0222	1	1	1	13	unnamed	unnamed	Brca1	Brca1
GO Biological Process	GO:2000620	positive regulation of histone H4-K16 acetylation	57	0.00926	1	1	108	0.00926	1	1	0.0222	1	1	1	1	unnamed	unnamed	Brca1	Brca1
GO Biological Process	GO:2000617	positive regulation of histone H3-K9 acetylation	57	0.00926	1	1	108	0.00926	1	1	0.0222	1	1	1	1	unnamed	unnamed	Brca1	Brca1
GO Biological Process	GO:0090239	regulation of histone H4 acetylation	57	0.00926	1	1	108	0.00926	1	1	0.0222	1	1	1	2	unnamed	unnamed	Brca1	Brca1
GO Biological Process	GO:0085020	protein K6-linked ubiquitination	57	0.00926	1	1	108	0.00926	1	1	0.0222	1	1	1	6	unnamed	unnamed	Brca1	Brca1
GO Biological Process	GO:0071157	negative regulation of cell cycle arrest	57	0.00926	1	1	108	0.00926	1	1	0.0222	1	1	1	6	unnamed	unnamed	Mdm4	Mdm4
GO Biological Process	GO:0042304	regulation of fatty acid biosynthetic process	57	0.00926	1	1	108	0.00926	1	1	0.0222	1	1	1	25	unnamed	unnamed	Brca1	Brca1
GO Biological Process	GO:0010625	positive regulation of Schwann cell proliferation	57	0.00926	1	1	108	0.00926	1	1	0.0222	1	1	1	1	unnamed	unnamed	Gfap	Gfap
GO Biological Process	GO:0051572	negative regulation of histone H3-K4 methylation	57	0.00926	1	1	108	0.00926	1	1	0.0222	1	1	1	3	unnamed	unnamed	Brca1	Brca1
GO Biological Process	GO:0010269	response to selenium ion	57	0.00926	1	1	108	0.00926	1	1	0.0222	1	1	1	11	unnamed	unnamed	Txnrd2	Txnrd2
GO Biological Process	GO:0009048	dosage compensation, by inactivation of X chromosome	57	0.00926	1	1	108	0.00926	1	1	0.0222	1	1	1	4	unnamed	unnamed	Brca1	Brca1
GO Biological Process	GO:0014002	astrocyte development	57	0.00926	1	1	108	0.00926	1	1	0.0222	1	1	1	12	unnamed	unnamed	Gfap	Gfap
GO Biological Process	GO:0010624	regulation of Schwann cell proliferation	57	0.00926	1	1	108	0.00926	1	1	0.0222	1	1	1	5	unnamed	unnamed	Gfap	Gfap
GO Biological Process	GO:0045922	negative regulation of fatty acid metabolic process	57	0.00926	1	1	108	0.00926	1	1	0.0222	1	1	1	11	unnamed	unnamed	Brca1	Brca1
GO Biological Process	GO:0033566	gamma-tubulin complex localization	57	0.00926	1	1	108	0.00926	1	1	0.0222	1	1	1	2	unnamed	unnamed	Mzt1	Mzt1
GO Biological Process	GO:0045717	negative regulation of fatty acid biosynthetic process	57	0.00926	1	1	108	0.00926	1	1	0.0222	1	1	1	9	unnamed	unnamed	Brca1	Brca1
GO Biological Process	GO:0045023	G0 to G1 transition	57	0.00926	1	1	108	0.00926	1	1	0.0222	1	1	1	1	unnamed	unnamed	Mdm4	Mdm4
GO Biological Process	GO:0035067	negative regulation of histone acetylation	57	0.00926	1	1	108	0.00926	1	1	0.0222	1	1	1	7	unnamed	unnamed	Brca1	Brca1
GO Biological Process	GO:0045104	intermediate filament cytoskeleton organization	80	0.00926	1	0.994	13.5	0.148	2	16	0.0444	0.125	3	9	22	unnamed,unnamed	unnamed,unnamed,unnamed,unnamed,unnamed,unnamed,unnamed,unnamed,unnamed,unnamed,unnamed,unnamed,unnamed,unnamed,unnamed,unnamed	Gfap,Nefl,Nefm	Agfg1,Cln8,Gfap,Ina,Mtm1,Nefh,Nefl,Nefm,Sod1
GO Biological Process	GO:0045103	intermediate filament-based process	80	0.00926	1	0.994	13.5	0.148	2	16	0.0444	0.125	3	9	23	unnamed,unnamed	unnamed,unnamed,unnamed,unnamed,unnamed,unnamed,unnamed,unnamed,unnamed,unnamed,unnamed,unnamed,unnamed,unnamed,unnamed,unnamed	Gfap,Nefl,Nefm	Agfg1,Cln8,Gfap,Ina,Mtm1,Nefh,Nefl,Nefm,Sod1
GO Biological Process	GO:0009100	glycoprotein metabolic process	82	0.00954	1	0.999	4.75	0.843	4	91	0.0889	0.044	1	49	165	unnamed,unnamed,unnamed,unnamed	unnamed,unnamed,unnamed,unnamed,unnamed,unnamed,unnamed,unnamed,unnamed,unnamed,unnamed,unnamed,unnamed,unnamed,unnamed,unnamed,unnamed,unnamed,unnamed,unnamed,unnamed,unnamed,unnamed,unnamed,unnamed,unnamed,unnamed,unnamed,unnamed,unnamed,unnamed,unnamed,unnamed,unnamed,unnamed,unnamed,unnamed,unnamed,unnamed,unnamed,unnamed,unnamed,unnamed,unnamed,unnamed,unnamed,unnamed,unnamed,unnamed,unnamed…	Ide	Abcg1,Acan,B3galnt1,B3galt2,B3gnt3,B3gnt7,B4galt7,Chst11,Chst14,Chst3,Chst7,Cog3,Diablo,Dlg1,Dolpp1,Dpm1,Edem3,Egflam,Erp44,Fbxo2,Fut10,Galnt1,Galnt3,Gxylt1,Hs2st1,Hs6st1,Ide,Impad1,Krtcap2,Large,Man1a2,Manba,Mgat2,Mgat5,Plcb1,Prkcsh,Psen1,Spock2,St3gal2,St3gal6,St6galnac1,St8sia3,St8sia5,Stt3b,Tnip1,Tusc3,Uggt1,Uggt2,Unc13a
GO Biological Process	GO:0006091	generation of precursor metabolites and energy	83	0.0109	1	1	3.67	1.36	5	147	0.111	0.034	5	65	257	unnamed,unnamed,unnamed,unnamed,unnamed	unnamed,unnamed,unnamed,unnamed,unnamed,unnamed,unnamed,unnamed,unnamed,unnamed,unnamed,unnamed,unnamed,unnamed,unnamed,unnamed,unnamed,unnamed,unnamed,unnamed,unnamed,unnamed,unnamed,unnamed,unnamed,unnamed,unnamed,unnamed,unnamed,unnamed,unnamed,unnamed,unnamed,unnamed,unnamed,unnamed,unnamed,unnamed,unnamed,unnamed,unnamed,unnamed,unnamed,unnamed,unnamed,unnamed,unnamed,unnamed,unnamed,unnamed…	Gapdh,Il6st,Ogdhl,S100b,mt-Nd4	4933405O20Rik,Adrb1,Aifm3,Akt2,Aldh5a1,Cox10,Cps1,Dld,Enox1,Enox2,Epm2a,Ero1l,Fa2h,Fads2,Fads3,Fastkd2,Fdxr,Fh1,G6pc,Gapdh,Gapdh,Gnmt,Got1,Gpi1,Hk1,Hkdc1,Il6st,Lep,Msh2,Ncaph2,Ndufa1,Ndufa10,Ndufa12,Ndufa13,Ndufa6,Ndufa9,Ndufab1,Ndufb11,Ndufb2,Ndufb3,Ndufb5,Ndufb9,Ndufs1,Ndufs4,Ndufs7,Ogdhl,Oxa1l,Pdhb,Pgam2,Pgk2,Phkb,Pkm2,Ppargc1a,Ppp1cb,Ppp1r3e,Ppp3r2,S100b,Slc25a12,Slc25a13,Tmx4,Txnl1,Tymp,Uqcr…
GO Biological Process	GO:0018904	organic ether metabolic process	84	0.0117	1	1	12	0.167	2	18	0.0444	0.111	2	11	77	unnamed,unnamed	unnamed,unnamed,unnamed,unnamed,unnamed,unnamed,unnamed,unnamed,unnamed,unnamed,unnamed,unnamed,unnamed,unnamed,unnamed,unnamed,unnamed,unnamed	Il6st,Pdia3	Agpat5,Cdipt,Cps1,G6pc,Il6st,Lpin1,Lpl,Pdia3,Pex7,Ppap2a,Txnl1
GO Biological Process	GO:0006662	glycerol ether metabolic process	84	0.0117	1	1	12	0.167	2	18	0.0444	0.111	2	11	70	unnamed,unnamed	unnamed,unnamed,unnamed,unnamed,unnamed,unnamed,unnamed,unnamed,unnamed,unnamed,unnamed,unnamed,unnamed,unnamed,unnamed,unnamed,unnamed,unnamed	Il6st,Pdia3	Agpat5,Cdipt,Cps1,G6pc,Il6st,Lpin1,Lpl,Pdia3,Pex7,Ppap2a,Txnl1
GO Biological Process	GO:0051641	cellular localization	86	0.0124	1	1	2.09	5.26	11	568	0.244	0.0194	7	251	1000	unnamed,unnamed,unnamed,unnamed,unnamed,unnamed,unnamed,unnamed,unnamed,unnamed,unnamed	unnamed,unnamed,unnamed,unnamed,unnamed,unnamed,unnamed,unnamed,unnamed,unnamed,unnamed,unnamed,unnamed,unnamed,unnamed,unnamed,unnamed,unnamed,unnamed,unnamed,unnamed,unnamed,unnamed,unnamed,unnamed,unnamed,unnamed,unnamed,unnamed,unnamed,unnamed,unnamed,unnamed,unnamed,unnamed,unnamed,unnamed,unnamed,unnamed,unnamed,unnamed,unnamed,unnamed,unnamed,unnamed,unnamed,unnamed,unnamed,unnamed,unnamed…	Cplx1,Gipc1,March5,Mon2,Mzt1,Nefm,Thoc3	1500003O03Rik,Abcg1,Acr,Ank2,Ankrd13c,Ap1g1,Ap1m1,Ap1s1,Ap1s2,Ap1s3,Ap2m1,Ap3m1,Ap4s1,Apba1,App,Appbp2,Arap1,Arcn1,Arf6,Arfgap3,Arhgef2,Arl1,Arl2bp,Aspm,Atxn1,Axin2,Bbs4,Bcl2,Bhlha15,Bicd1,Bmp7,Bnip3,Brsk1,Cacna1b,Cacnb1,Camk4,Ccdc109a,Ccdc64,Cdc42bpa,Cdk5rap2,Cep57,Clk2,Clta,Cltc,Cntn2,Cog3,Col4a3bp,Cope,Cplx1,Cplx2,Cse1l,Ctgf,Ctnnb1,Dag1,Ddx25,Dio2,Dlg4,Dync1i1,Egr2,Enah,Erbb2ip,Ergic1,Ergic2,E…
GO Biological Process	GO:0001505	regulation of neurotransmitter levels	87	0.0126	1	1	6.11	0.491	3	53	0.0667	0.0566	2	24	77	unnamed,unnamed,unnamed	unnamed,unnamed,unnamed,unnamed,unnamed,unnamed,unnamed,unnamed,unnamed,unnamed,unnamed,unnamed,unnamed,unnamed,unnamed,unnamed,unnamed,unnamed,unnamed,unnamed,unnamed,unnamed,unnamed,unnamed,unnamed,unnamed,unnamed,unnamed,unnamed,unnamed,unnamed,unnamed,unnamed,unnamed,unnamed,unnamed,unnamed,unnamed,unnamed,unnamed,unnamed,unnamed,unnamed,unnamed,unnamed,unnamed,unnamed,unnamed,unnamed,unnamed…	Cplx1,Gabra2	Agtpbp1,Aldh5a1,Aldh9a1,Brsk1,Cacna1b,Cln8,Colq,Cplx1,Cplx2,Gabra2,Gad2,Naalad2,Pclo,Pebp1,Ppfia3,Prima1,Psen1,Slc17a6,Slc18a1,Slc25a4,Slc5a7,Snap25,Stx4a,Unc13a
GO Biological Process	GO:0048522	positive regulation of cellular process	88	0.013	1	1	1.66	10.9	18	1173	0.4	0.0153	15	520	2378	unnamed,unnamed,unnamed,unnamed,unnamed,unnamed,unnamed,unnamed,unnamed,unnamed,unnamed,unnamed,unnamed,unnamed,unnamed,unnamed,unnamed,unnamed	unnamed,unnamed,unnamed,unnamed,unnamed,unnamed,unnamed,unnamed,unnamed,unnamed,unnamed,unnamed,unnamed,unnamed,unnamed,unnamed,unnamed,unnamed,unnamed,unnamed,unnamed,unnamed,unnamed,unnamed,unnamed,unnamed,unnamed,unnamed,unnamed,unnamed,unnamed,unnamed,unnamed,unnamed,unnamed,unnamed,unnamed,unnamed,unnamed,unnamed,unnamed,unnamed,unnamed,unnamed,unnamed,unnamed,unnamed,unnamed,unnamed,unnamed…	Brca1,Dusp1,Ell3,Gfap,Gipc1,Il31ra,Il6st,Limk1,March5,Mdm4,Nefl,Pdia3,S100b,Tipin,Tnfrsf11a	1500010J02Rik,2810002N01Rik,AK028549,Abhd5,Ablim1,Acvr1b,Adam17,Adam8,Adnp2,Adrb1,Adrbk1,Afap1l2,Agap2,Ahr,Aifm3,Akt2,Amph,Apbb2,Apc,Apoa1,App,Ar,Arap1,Arf6,Arhgap5,Arl2bp,Arnt2,Arpp19,Arrb1,Asns,Atf1,Atf2,Atf3,Atg7,Atm,Atoh1,Atxn1,Axin2,B230120H23Rik,BC096441,Bag1,Baz1b,Bbs4,Bcl10,Bcl2,Bcl2l11,Bcr,Bhlha15,Bhlhe23,Bicd1,Bmp7,Bmpr1a,Bmpr1b,Bmpr2,Bnip1,Bnip3,Braf,Brca1,Brd4,Btrc,Bves,C5ar1,C6,Cab39…
GO Biological Process	GO:0006464	protein modification process	89	0.0133	1	1	1.79	8.4	15	907	0.333	0.0165	8	398	1705	unnamed,unnamed,unnamed,unnamed,unnamed,unnamed,unnamed,unnamed,unnamed,unnamed,unnamed,unnamed,unnamed,unnamed,unnamed	unnamed,unnamed,unnamed,unnamed,unnamed,unnamed,unnamed,unnamed,unnamed,unnamed,unnamed,unnamed,unnamed,unnamed,unnamed,unnamed,unnamed,unnamed,unnamed,unnamed,unnamed,unnamed,unnamed,unnamed,unnamed,unnamed,unnamed,unnamed,unnamed,unnamed,unnamed,unnamed,unnamed,unnamed,unnamed,unnamed,unnamed,unnamed,unnamed,unnamed,unnamed,unnamed,unnamed,unnamed,unnamed,unnamed,unnamed,unnamed,unnamed,unnamed…	Brca1,Chfr,Cwh43,Dusp1,Gak,Hipk4,Limk1,March5	2410022L05Rik,Acvr1b,Adam8,Adrbk1,Agtpbp1,Akt2,Akt3,Alpk2,Anapc1,Anapc16,Anapc7,Ankk1,App,Arih1,Arrb1,Asphd1,Asphd2,Atg7,Atm,Atxn3,B230120H23Rik,B3galnt1,B3galt2,B3gnt3,B3gnt7,Baz1b,Bcl2,Bcr,Bmp7,Bmpr1a,Bmpr1b,Bmpr2,Braf,Brca1,Brd1,Brd4,Brsk1,Btrc,Camk2d,Camk4,Camkk2,Cand1,Cbl,Cblb,Cbll1,Ccnd1,Ccnh,Ccnt1,Cdc42bpa,Cdk14,Cdk5r1,Cdk7,Cdk8,Cdkl1,Cfl1,Chek1,Chfr,Cit,Clk1,Clk2,Clock,Cog3,Cops5,Cops6,Co…
GO Biological Process	GO:0048519	negative regulation of biological process	90	0.014	1	1	1.64	10.9	18	1182	0.4	0.0152	13	505	2315	unnamed,unnamed,unnamed,unnamed,unnamed,unnamed,unnamed,unnamed,unnamed,unnamed,unnamed,unnamed,unnamed,unnamed,unnamed,unnamed,unnamed,unnamed	unnamed,unnamed,unnamed,unnamed,unnamed,unnamed,unnamed,unnamed,unnamed,unnamed,unnamed,unnamed,unnamed,unnamed,unnamed,unnamed,unnamed,unnamed,unnamed,unnamed,unnamed,unnamed,unnamed,unnamed,unnamed,unnamed,unnamed,unnamed,unnamed,unnamed,unnamed,unnamed,unnamed,unnamed,unnamed,unnamed,unnamed,unnamed,unnamed,unnamed,unnamed,unnamed,unnamed,unnamed,unnamed,unnamed,unnamed,unnamed,unnamed,unnamed…	Brca1,Dach1,Dusp1,Gfap,Gipc1,Hspa1b,Il6st,Limk1,March5,Mdm4,Nefl,Sncb,Tipin	1500015O10Rik,4632434I11Rik,4921515J06Rik,AK028549,Abcg1,Abhd2,Abhd5,Abhd6,Acan,Adam17,Adam8,Adar,Add2,Adnp2,Adra1d,Adrb1,Adrbk1,Aes,Agap2,Ahr,Akt2,Ankrd26,Aoah,Apbb2,Apc,Apoa1,Apom,App,Ar,Arap1,Arap3,Arhgap10,Arhgef2,Arl6ip5,Arnt2,Arrb1,Asns,Aspm,Atf3,Atg7,Atm,Atp2a2,Atxn1,Aven,Axin2,B230120H23Rik,B4galt7,Bag1,Bag3,Bag5,Bahd1,Barhl1,Basp1,Bcl10,Bcl2,Bcl2l10,Bcr,Bhlhe23,Bhlhe41,Bmp7,Bmpr1a,Bmpr2,…
GO Biological Process	GO:0048871	multicellular organismal homeostasis	91	0.0146	1	1	5.79	0.519	3	56	0.0667	0.0536	2	26	104	unnamed,unnamed,unnamed	unnamed,unnamed,unnamed,unnamed,unnamed,unnamed,unnamed,unnamed,unnamed,unnamed,unnamed,unnamed,unnamed,unnamed,unnamed,unnamed,unnamed,unnamed,unnamed,unnamed,unnamed,unnamed,unnamed,unnamed,unnamed,unnamed,unnamed,unnamed,unnamed,unnamed,unnamed,unnamed,unnamed,unnamed,unnamed,unnamed,unnamed,unnamed,unnamed,unnamed,unnamed,unnamed,unnamed,unnamed,unnamed,unnamed,unnamed,unnamed,unnamed,unnamed…	Cd7,Tnfrsf11a	Ankrd11,Bbs1,Bbs10,Bbs4,Bcl2,Cbl,Cd7,Ctnnb1,Drd2,Epas1,Fh1,Htr2a,Itgb1,Klhl10,Ldb1,Ncdn,Ndn,Ppp1r13l,Pthlh,Sash3,Sod1,Stk11,Tnfrsf11a,Tnfsf11,Vegfa,Whrn
GO Biological Process	GO:0045597	positive regulation of cell differentiation	92	0.0149	1	1	2.95	2.04	6	220	0.133	0.0273	4	90	404	unnamed,unnamed,unnamed,unnamed,unnamed,unnamed	unnamed,unnamed,unnamed,unnamed,unnamed,unnamed,unnamed,unnamed,unnamed,unnamed,unnamed,unnamed,unnamed,unnamed,unnamed,unnamed,unnamed,unnamed,unnamed,unnamed,unnamed,unnamed,unnamed,unnamed,unnamed,unnamed,unnamed,unnamed,unnamed,unnamed,unnamed,unnamed,unnamed,unnamed,unnamed,unnamed,unnamed,unnamed,unnamed,unnamed,unnamed,unnamed,unnamed,unnamed,unnamed,unnamed,unnamed,unnamed,unnamed,unnamed…	Gfap,Il6st,Limk1,Nefl	Adam8,Adrb1,Apc,Atoh1,Axin2,Bcl2,Bmp7,Bmpr1a,Bmpr1b,Bmpr2,Cd276,Cd83,Cdh4,Cdon,Ctnnb1,Cyp26b1,Cyp27b1,Cyr61,Drd2,Epb4.1l5,Etv5,Fez1,Fgf18,Fgfr3,Frzb,Gfap,Gm614,Grm5,Hes1,Heyl,Hoxd11,Hoxd3,Hsp90aa1,Id4,Il6st,Itgb1,Junb,Lep,Limk1,Lpl,Lyn,Maml1,Mapk9,Meg3,Mll5,Msr1,Mtap1b,Nbl1,Nefl,Nkx2-5,Notch2,Nppc,Nrg1,Ntrk3,Numb,Pax2,Pax6,Pax8,Pcid2,Plcb1,Ppargc1b,Rcor1,Rgs6,Rhoa,Robo1,Sall1,Sash3,Sema4d,Shank3,…
GO Biological Process	GO:0008361	regulation of cell size	93	0.0153	1	1	5.68	0.528	3	57	0.0667	0.0526	1	16	65	unnamed,unnamed,unnamed	unnamed,unnamed,unnamed,unnamed,unnamed,unnamed,unnamed,unnamed,unnamed,unnamed,unnamed,unnamed,unnamed,unnamed,unnamed,unnamed,unnamed,unnamed,unnamed,unnamed,unnamed,unnamed,unnamed,unnamed,unnamed,unnamed,unnamed,unnamed,unnamed,unnamed,unnamed,unnamed,unnamed,unnamed,unnamed,unnamed,unnamed,unnamed,unnamed,unnamed,unnamed,unnamed,unnamed,unnamed,unnamed,unnamed,unnamed,unnamed,unnamed,unnamed…	Limk1	Ahr,Arhgap5,Cdh4,Cln8,Limk1,Mtap1b,Nrp1,Ntrk3,Plxna4,Rb1cc1,Sema3a,Slit1,Spp1,Tnr,Ttl,Ulk2
GO Biological Process	GO:0006836	neurotransmitter transport	93	0.0153	1	1	5.68	0.528	3	57	0.0667	0.0526	2	26	91	unnamed,unnamed,unnamed	unnamed,unnamed,unnamed,unnamed,unnamed,unnamed,unnamed,unnamed,unnamed,unnamed,unnamed,unnamed,unnamed,unnamed,unnamed,unnamed,unnamed,unnamed,unnamed,unnamed,unnamed,unnamed,unnamed,unnamed,unnamed,unnamed,unnamed,unnamed,unnamed,unnamed,unnamed,unnamed,unnamed,unnamed,unnamed,unnamed,unnamed,unnamed,unnamed,unnamed,unnamed,unnamed,unnamed,unnamed,unnamed,unnamed,unnamed,unnamed,unnamed,unnamed…	Cplx1,Gabra2	Brsk1,Cacna1b,Cln8,Cplx1,Cplx2,Gabra2,Pclo,Ppfia3,Psen1,Rims1,Rims2,Rims3,Slc17a6,Slc17a8,Slc18a1,Slc18a2,Slc18a3,Slc25a4,Slc6a3,Slc6a8,Snap25,Stx1b,Stx4a,Sv2a,Sv2c,Unc13a
GO Biological Process	GO:0050767	regulation of neurogenesis	95	0.0155	1	1	2.92	2.06	6	222	0.133	0.027	5	93	353	unnamed,unnamed,unnamed,unnamed,unnamed,unnamed	unnamed,unnamed,unnamed,unnamed,unnamed,unnamed,unnamed,unnamed,unnamed,unnamed,unnamed,unnamed,unnamed,unnamed,unnamed,unnamed,unnamed,unnamed,unnamed,unnamed,unnamed,unnamed,unnamed,unnamed,unnamed,unnamed,unnamed,unnamed,unnamed,unnamed,unnamed,unnamed,unnamed,unnamed,unnamed,unnamed,unnamed,unnamed,unnamed,unnamed,unnamed,unnamed,unnamed,unnamed,unnamed,unnamed,unnamed,unnamed,unnamed,unnamed…	Gfap,Il6st,Limk1,Nefl,Nefm	App,Arf6,Arhgef2,Aspm,Atf1,Atoh1,Bcl2,Bmp7,Bmpr1a,Ccnd2,Cdh4,Cdk5r1,Cdk5rap2,Cdon,Chn1,Cit,Cntn2,Cntn4,Ctnnb1,D130043K22Rik,Drd2,Efna1,Etv5,Fez1,Fgfr3,Gdf11,Gfap,Grin1,Grm5,Hes1,Hes5,Heyl,Hook3,Hoxd3,Id4,Il6st,Itgb1,Itm2c,Limk1,Lyn,Lzts1,Mt3,Mtap1b,Nbl1,Ncs1,Nefl,Nefm,Nkx2-5,Nrp1,Ntm,Ntrk2,Ntrk3,Numb,Pax6,Pcm1,Pdlim5,Plxna4,Pmp22,Psen1,Ptk6,Rapgef4,Rgs6,Rhoa,Robo1,Sall1,Sema3a,Sema4d,Shank3,Sipa1…
GO Biological Process	GO:0007269	neurotransmitter secretion	96	0.0157	1	1	10.3	0.194	2	21	0.0444	0.0952	1	10	44	unnamed,unnamed	unnamed,unnamed,unnamed,unnamed,unnamed,unnamed,unnamed,unnamed,unnamed,unnamed,unnamed,unnamed,unnamed,unnamed,unnamed,unnamed,unnamed,unnamed,unnamed,unnamed,unnamed	Cplx1	Brsk1,Cacna1b,Cplx1,Cplx2,Pclo,Ppfia3,Psen1,Snap25,Stx4a,Unc13a
GO Biological Process	GO:0042592	homeostatic process	97	0.0161	1	1	2.24	4.02	9	434	0.2	0.0207	8	194	866	unnamed,unnamed,unnamed,unnamed,unnamed,unnamed,unnamed,unnamed,unnamed	unnamed,unnamed,unnamed,unnamed,unnamed,unnamed,unnamed,unnamed,unnamed,unnamed,unnamed,unnamed,unnamed,unnamed,unnamed,unnamed,unnamed,unnamed,unnamed,unnamed,unnamed,unnamed,unnamed,unnamed,unnamed,unnamed,unnamed,unnamed,unnamed,unnamed,unnamed,unnamed,unnamed,unnamed,unnamed,unnamed,unnamed,unnamed,unnamed,unnamed,unnamed,unnamed,unnamed,unnamed,unnamed,unnamed,unnamed,unnamed,unnamed,unnamed…	Cd7,Hspa1b,Il6st,Mafg,Pdia3,S100b,Tnfrsf11a,Txnrd2	1500010J02Rik,Abcb5,Abcb7,Abcg1,Adrb1,Afg3l2,Ahr,Aifm3,Ankrd11,Apc,Apoa1,App,Aqp11,Aqp4,Arf1,Atp2a2,Atp6v0c,Atxn1,Bbs1,Bbs10,Bbs4,Bcl2,Bcl2l11,Bhlha15,Bnip3,Cacna1e,Cacng2,Calca,Cbl,Ccdc109a,Cd7,Cherp,Chrna7,Chst3,Cldn11,Clns1a,Clstn1,Cntn2,Col4a3bp,Cps1,Ctnnb1,Cul5,Cx3cl1,Cxcl13,Cyp27b1,Cyp7a1,Dag1,Dld,Dnajc16,Drd2,Efhc1,Egln1,Egr2,Epas1,Erp44,Fasl,Fgfr3,Fh1,Fitm2,Fkbp1a,Fyn,G6pc,Galr2,Gclc,Ghrl…
GO Biological Process	GO:0032535	regulation of cellular component size	98	0.0166	1	1	4.04	0.991	4	107	0.0889	0.0374	3	39	144	unnamed,unnamed,unnamed,unnamed	unnamed,unnamed,unnamed,unnamed,unnamed,unnamed,unnamed,unnamed,unnamed,unnamed,unnamed,unnamed,unnamed,unnamed,unnamed,unnamed,unnamed,unnamed,unnamed,unnamed,unnamed,unnamed,unnamed,unnamed,unnamed,unnamed,unnamed,unnamed,unnamed,unnamed,unnamed,unnamed,unnamed,unnamed,unnamed,unnamed,unnamed,unnamed,unnamed,unnamed,unnamed,unnamed,unnamed,unnamed,unnamed,unnamed,unnamed,unnamed,unnamed,unnamed…	Limk1,Nefl,Nefm	Actr3b,Add2,Ahr,Arf6,Arhgap5,Arpc3,Arpc5,Capza2,Cdh4,Cfl1,Cln8,Cntn2,Dlg1,Dstn,Fert2,Jmy,Limk1,Mtap1b,Nck1,Nefl,Nefm,Nrp1,Ntrk3,Pak3,Pfn2,Plxna4,Rasa1,Rb1cc1,Sema3a,Slit1,Slit2,Spna2,Spp1,Ssh1,Ssh2,Tnr,Ttl,Ulk2,Vil1
GO Biological Process	GO:0045454	cell redox homeostasis	99	0.0172	1	1	9.82	0.204	2	22	0.0444	0.0909	2	15	59	unnamed,unnamed	unnamed,unnamed,unnamed,unnamed,unnamed,unnamed,unnamed,unnamed,unnamed,unnamed,unnamed,unnamed,unnamed,unnamed,unnamed,unnamed,unnamed,unnamed,unnamed,unnamed,unnamed,unnamed	Pdia3,Txnrd2	Aifm3,Dld,Dnajc16,Erp44,Gclc,Glrx3,Magt1,Pdia3,Ptges2,Tmx4,Tusc3,Txndc16,Txndc9,Txnl1,Txnrd2
GO Biological Process	GO:0023061	signal release	100	0.0176	1	1	5.4	0.556	3	60	0.0667	0.05	2	26	111	unnamed,unnamed,unnamed	unnamed,unnamed,unnamed,unnamed,unnamed,unnamed,unnamed,unnamed,unnamed,unnamed,unnamed,unnamed,unnamed,unnamed,unnamed,unnamed,unnamed,unnamed,unnamed,unnamed,unnamed,unnamed,unnamed,unnamed,unnamed,unnamed,unnamed,unnamed,unnamed,unnamed,unnamed,unnamed,unnamed,unnamed,unnamed,unnamed,unnamed,unnamed,unnamed,unnamed,unnamed,unnamed,unnamed,unnamed,unnamed,unnamed,unnamed,unnamed,unnamed,unnamed…	Cplx1,Gipc1	Apba1,Brsk1,Cacna1b,Cplx1,Cplx2,Dio2,Gipc1,Htt,Lep,Lyn,Mafa,Meg3,Ntrk2,Pclo,Ppfia3,Psen1,Rapgef4,Rims2,Slc18a2,Smad2,Smpd3,Snap25,Stx4a,Unc13a,Vgf,Ywhaz
GO Biological Process	GO:0043412	macromolecule modification	101	0.0181	1	1	1.73	8.69	15	939	0.333	0.016	8	410	1794	unnamed,unnamed,unnamed,unnamed,unnamed,unnamed,unnamed,unnamed,unnamed,unnamed,unnamed,unnamed,unnamed,unnamed,unnamed	unnamed,unnamed,unnamed,unnamed,unnamed,unnamed,unnamed,unnamed,unnamed,unnamed,unnamed,unnamed,unnamed,unnamed,unnamed,unnamed,unnamed,unnamed,unnamed,unnamed,unnamed,unnamed,unnamed,unnamed,unnamed,unnamed,unnamed,unnamed,unnamed,unnamed,unnamed,unnamed,unnamed,unnamed,unnamed,unnamed,unnamed,unnamed,unnamed,unnamed,unnamed,unnamed,unnamed,unnamed,unnamed,unnamed,unnamed,unnamed,unnamed,unnamed…	Brca1,Chfr,Cwh43,Dusp1,Gak,Hipk4,Limk1,March5	2410022L05Rik,4921515J06Rik,A1cf,Acvr1b,Adam8,Adar,Adrbk1,Agtpbp1,Akt2,Akt3,Alkbh2,Alkbh3,Alkbh8,Alpk2,Anapc1,Anapc16,Anapc7,Ankk1,App,Arih1,Arrb1,Asphd1,Asphd2,Atg7,Atm,Atxn3,B230120H23Rik,B3galnt1,B3galt2,B3gnt3,B3gnt7,Baz1b,Bcl2,Bcr,Bmp7,Bmpr1a,Bmpr1b,Bmpr2,Braf,Brca1,Brd1,Brd4,Brsk1,Btrc,Camk2d,Camk4,Camkk2,Cand1,Cbl,Cblb,Cbll1,Ccnd1,Ccnh,Ccnt1,Cdc42bpa,Cdk14,Cdk5r1,Cdk7,Cdk8,Cdkal1,Cdkl1,Cfl…
GO Biological Process	GO:0051495	positive regulation of cytoskeleton organization	102	0.0184	1	1	5.31	0.565	3	61	0.0667	0.0492	1	22	73	unnamed,unnamed,unnamed	unnamed,unnamed,unnamed,unnamed,unnamed,unnamed,unnamed,unnamed,unnamed,unnamed,unnamed,unnamed,unnamed,unnamed,unnamed,unnamed,unnamed,unnamed,unnamed,unnamed,unnamed,unnamed,unnamed,unnamed,unnamed,unnamed,unnamed,unnamed,unnamed,unnamed,unnamed,unnamed,unnamed,unnamed,unnamed,unnamed,unnamed,unnamed,unnamed,unnamed,unnamed,unnamed,unnamed,unnamed,unnamed,unnamed,unnamed,unnamed,unnamed,unnamed…	Limk1	Apc,Arf6,Cdkn1b,Cfl1,Clip1,Dlg1,Dstn,Fert2,Gpr65,Jmy,Limk1,Mtap1b,Nck1,Pfn2,Plk4,Rhoa,Stmn2,Synpo,Tac1,Terf1,Vil1,Wnt11
GO Biological Process	GO:0060242	contact inhibition	103	0.0184	1	1	54	0.0185	1	2	0.0222	0.5	1	2	4	unnamed	unnamed,unnamed	Dach1	Dach1,Tspo
GO Biological Process	GO:0060086	circadian temperature homeostasis	103	0.0184	1	1	54	0.0185	1	2	0.0222	0.5	1	1	1	unnamed	unnamed,unnamed	Tnfrsf11a	Tnfrsf11a
GO Biological Process	GO:0051574	positive regulation of histone H3-K9 methylation	103	0.0184	1	1	54	0.0185	1	2	0.0222	0.5	1	2	3	unnamed	unnamed,unnamed	Brca1	Brca1,Jarid2
GO Biological Process	GO:0051571	positive regulation of histone H3-K4 methylation	103	0.0184	1	1	54	0.0185	1	2	0.0222	0.5	1	2	5	unnamed	unnamed,unnamed	Brca1	Brca1,Paxip1
GO Biological Process	GO:0070102	interleukin-6-mediated signaling pathway	103	0.0184	1	1	54	0.0185	1	2	0.0222	0.5	1	1	6	unnamed	unnamed,unnamed	Il6st	Il6st
GO Biological Process	GO:0070741	response to interleukin-6	103	0.0184	1	1	54	0.0185	1	2	0.0222	0.5	1	1	16	unnamed	unnamed,unnamed	Il6st	Il6st
GO Biological Process	GO:0051570	regulation of histone H3-K9 methylation	103	0.0184	1	1	54	0.0185	1	2	0.0222	0.5	1	2	6	unnamed	unnamed,unnamed	Brca1	Brca1,Jarid2
GO Biological Process	GO:2000104	negative regulation of DNA-dependent DNA replication	103	0.0184	1	1	54	0.0185	1	2	0.0222	0.5	1	1	6	unnamed	unnamed,unnamed	Tipin	Tipin
GO Biological Process	GO:0071681	cellular response to indole-3-methanol	103	0.0184	1	1	54	0.0185	1	2	0.0222	0.5	1	2	4	unnamed	unnamed,unnamed	Brca1	Brca1,Ctnnb1
GO Biological Process	GO:0071354	cellular response to interleukin-6	103	0.0184	1	1	54	0.0185	1	2	0.0222	0.5	1	1	10	unnamed	unnamed,unnamed	Il6st	Il6st
GO Biological Process	GO:0070104	negative regulation of interleukin-6-mediated signaling pathway	103	0.0184	1	1	54	0.0185	1	2	0.0222	0.5	1	1	1	unnamed	unnamed,unnamed	Il6st	Il6st
GO Biological Process	GO:0042522	regulation of tyrosine phosphorylation of Stat5 protein	103	0.0184	1	1	54	0.0185	1	2	0.0222	0.5	1	1	14	unnamed	unnamed,unnamed	Il31ra	Il31ra
GO Biological Process	GO:0031061	negative regulation of histone methylation	103	0.0184	1	1	54	0.0185	1	2	0.0222	0.5	1	2	8	unnamed	unnamed,unnamed	Brca1	Brca1,Jarid2
GO Biological Process	GO:0051569	regulation of histone H3-K4 methylation	103	0.0184	1	1	54	0.0185	1	2	0.0222	0.5	1	2	9	unnamed	unnamed,unnamed	Brca1	Brca1,Paxip1
GO Biological Process	GO:0000320	re-entry into mitotic cell cycle	103	0.0184	1	1	54	0.0185	1	2	0.0222	0.5	1	2	4	unnamed	unnamed,unnamed	Mdm4	Ccnd1,Mdm4
GO Biological Process	GO:0000076	DNA replication checkpoint	103	0.0184	1	1	54	0.0185	1	2	0.0222	0.5	1	1	7	unnamed	unnamed,unnamed	Tipin	Tipin
GO Biological Process	GO:0031503	protein complex localization	103	0.0184	1	1	54	0.0185	1	2	0.0222	0.5	1	2	8	unnamed	unnamed,unnamed	Mzt1	Mzt1,Tmem48
GO Biological Process	GO:0007549	dosage compensation	103	0.0184	1	1	54	0.0185	1	2	0.0222	0.5	1	2	6	unnamed	unnamed,unnamed	Brca1	Brca1,H2afy2
GO Biological Process	GO:0048478	replication fork protection	103	0.0184	1	1	54	0.0185	1	2	0.0222	0.5	1	1	2	unnamed	unnamed,unnamed	Tipin	Tipin
GO Biological Process	GO:0034629	cellular protein complex localization	103	0.0184	1	1	54	0.0185	1	2	0.0222	0.5	1	2	4	unnamed	unnamed,unnamed	Mzt1	Mzt1,Tmem48
GO Biological Process	GO:0042523	positive regulation of tyrosine phosphorylation of Stat5 protein	103	0.0184	1	1	54	0.0185	1	2	0.0222	0.5	1	1	11	unnamed	unnamed,unnamed	Il31ra	Il31ra
GO Biological Process	GO:0051298	centrosome duplication	103	0.0184	1	1	54	0.0185	1	2	0.0222	0.5	1	2	12	unnamed	unnamed,unnamed	Brca1	Brca1,Brsk1
GO Biological Process	GO:0007093	mitotic cell cycle checkpoint	125	0.0187	1	1	9.39	0.213	2	23	0.0444	0.087	1	9	47	unnamed,unnamed	unnamed,unnamed,unnamed,unnamed,unnamed,unnamed,unnamed,unnamed,unnamed,unnamed,unnamed,unnamed,unnamed,unnamed,unnamed,unnamed,unnamed,unnamed,unnamed,unnamed,unnamed,unnamed,unnamed	Chfr	Apc,Atm,Ccnd1,Chfr,Fbxo31,Foxo4,Kras,Pura,Terf1
GO Biological Process	GO:0050793	regulation of developmental process	126	0.0207	1	1	1.94	5.66	11	611	0.244	0.018	7	262	1174	unnamed,unnamed,unnamed,unnamed,unnamed,unnamed,unnamed,unnamed,unnamed,unnamed,unnamed	unnamed,unnamed,unnamed,unnamed,unnamed,unnamed,unnamed,unnamed,unnamed,unnamed,unnamed,unnamed,unnamed,unnamed,unnamed,unnamed,unnamed,unnamed,unnamed,unnamed,unnamed,unnamed,unnamed,unnamed,unnamed,unnamed,unnamed,unnamed,unnamed,unnamed,unnamed,unnamed,unnamed,unnamed,unnamed,unnamed,unnamed,unnamed,unnamed,unnamed,unnamed,unnamed,unnamed,unnamed,unnamed,unnamed,unnamed,unnamed,unnamed,unnamed…	Gfap,Il6st,Limk1,Mafg,March5,Nefl,Nefm	AK028549,Abcg1,Adam8,Adrb1,Agap2,Ahr,Apc,Apold1,App,Ar,Arap1,Arap3,Arf6,Arhgef2,Aspm,Atf1,Atoh1,Axin2,BC096441,Bcl2,Bcl2l11,Bhlhe23,Bmp7,Bmpr1a,Bmpr1b,Bmpr2,Bnip3,Bves,C5ar1,C6,Camsap1,Cblb,Ccnd1,Ccnd2,Cd276,Cd83,Cdc42ep4,Cdc42se1,Cdh4,Cdk5r1,Cdk5rap2,Cdkn1b,Cdon,Cfl1,Chn1,Cit,Cntn2,Cntn4,Crebbp,Crhr2,Cthrc1,Ctnnb1,Cul7,Cx3cl1,Cyfip1,Cyp26b1,Cyp27b1,Cyr61,D130043K22Rik,Ddah1,Dlg1,Drd2,Efna1,Epb4.…
GO Biological Process	GO:0051246	regulation of protein metabolic process	127	0.0208	1	1	2.03	4.92	10	531	0.222	0.0188	9	237	1040	unnamed,unnamed,unnamed,unnamed,unnamed,unnamed,unnamed,unnamed,unnamed,unnamed	unnamed,unnamed,unnamed,unnamed,unnamed,unnamed,unnamed,unnamed,unnamed,unnamed,unnamed,unnamed,unnamed,unnamed,unnamed,unnamed,unnamed,unnamed,unnamed,unnamed,unnamed,unnamed,unnamed,unnamed,unnamed,unnamed,unnamed,unnamed,unnamed,unnamed,unnamed,unnamed,unnamed,unnamed,unnamed,unnamed,unnamed,unnamed,unnamed,unnamed,unnamed,unnamed,unnamed,unnamed,unnamed,unnamed,unnamed,unnamed,unnamed,unnamed…	Brca1,Dusp1,Gipc1,Il31ra,Il6st,Limk1,Mdm4,S100b,Tnfrsf11a	Aarsd1,Acvr1b,Adam17,Adam33,Adam8,Afap1l2,Agap2,Agk,Akt2,Apc,Apoa1,Apom,App,Arl2bp,Arrb1,Atg4b,Atg7,Axin2,B230120H23Rik,Bag5,Bcl10,Bmp7,Bmpr1a,Bmpr2,Braf,Brca1,Btrc,C6,Cab39,Calca,Cblb,Ccnd1,Ccnd2,Ccnh,Ccnk,Ccno,Ccnt1,Ccnt2,Ccny,Cd276,Cd44,Cd46,Cd80,Cdk5r1,Cdkn1b,Cdon,Chek1,Chordc1,Cntn2,Cpeb1,Cpeb2,Ctgf,Cul4b,Cyr61,Dab2ip,Ddx25,Dgkb,Dgke,Dgkg,Dgki,Dlg1,Drd2,Dusp1,Dusp19,Dusp3,Dusp4,Dusp8,Dusp9,D…
GO Biological Process	GO:0045927	positive regulation of growth	128	0.0217	1	1	4.98	0.602	3	65	0.0667	0.0462	1	28	126	unnamed,unnamed,unnamed	unnamed,unnamed,unnamed,unnamed,unnamed,unnamed,unnamed,unnamed,unnamed,unnamed,unnamed,unnamed,unnamed,unnamed,unnamed,unnamed,unnamed,unnamed,unnamed,unnamed,unnamed,unnamed,unnamed,unnamed,unnamed,unnamed,unnamed,unnamed,unnamed,unnamed,unnamed,unnamed,unnamed,unnamed,unnamed,unnamed,unnamed,unnamed,unnamed,unnamed,unnamed,unnamed,unnamed,unnamed,unnamed,unnamed,unnamed,unnamed,unnamed,unnamed…	Limk1	Adam17,Adnp2,Adrb1,Ahr,Bcl2,Cdh4,Dlg1,Drd2,Extl3,Foxs1,Ino80,Lep,Limk1,Mtap1b,Ntrk3,Plcb1,Rps6kb1,Sash3,Sfn,Slc6a3,Sphk1,Supv3l1,Tgfb2,Trim32,Tshr,Ucn,Usp47,Wfs1
GO Biological Process	GO:0030073	insulin secretion	129	0.022	1	1	8.64	0.231	2	25	0.0444	0.08	1	10	32	unnamed,unnamed	unnamed,unnamed,unnamed,unnamed,unnamed,unnamed,unnamed,unnamed,unnamed,unnamed,unnamed,unnamed,unnamed,unnamed,unnamed,unnamed,unnamed,unnamed,unnamed,unnamed,unnamed,unnamed,unnamed,unnamed,unnamed	Cplx1	Cplx1,Htt,Lep,Mafa,Pclo,Rapgef4,Rims2,Slc18a2,Smad2,Vgf
GO Biological Process	GO:0007049	cell cycle	130	0.0231	1	1	2.24	3.56	8	385	0.178	0.0208	6	175	815	unnamed,unnamed,unnamed,unnamed,unnamed,unnamed,unnamed,unnamed	unnamed,unnamed,unnamed,unnamed,unnamed,unnamed,unnamed,unnamed,unnamed,unnamed,unnamed,unnamed,unnamed,unnamed,unnamed,unnamed,unnamed,unnamed,unnamed,unnamed,unnamed,unnamed,unnamed,unnamed,unnamed,unnamed,unnamed,unnamed,unnamed,unnamed,unnamed,unnamed,unnamed,unnamed,unnamed,unnamed,unnamed,unnamed,unnamed,unnamed,unnamed,unnamed,unnamed,unnamed,unnamed,unnamed,unnamed,unnamed,unnamed,unnamed…	Brca1,Chfr,Dusp1,Gak,Mdm4,Tipin	1500015O10Rik,4632434I11Rik,4922501C03Rik,Adam17,Ahr,Anapc1,Anapc16,Anapc7,Apbb2,Apc,App,Appl1,Arhgef2,Arl3,Arl8a,Arpp19,Aspm,Atm,B230120H23Rik,Bbs4,Bcl2,Bod1,Brca1,Brd4,Brsk1,C77370,Camk2d,Ccar1,Ccnd1,Ccnd2,Ccnh,Ccnk,Ccno,Ccnt1,Ccny,Cdc5l,Cdc6,Cdk14,Cdk5r1,Cdk5rap2,Cdk7,Cdk8,Cdkl1,Cdkn1b,Cep110,Chek1,Chfr,Cinp,Cit,Clgn,Cltc,Cpeb1,Csnk1a1,Ctnnb1,Cul3,Cul4b,Cul7,Cyp26b1,Cyp27b1,Dctn2,Dsn1,Dusp1,E2…
GO Biological Process	GO:0031570	DNA integrity checkpoint	131	0.0237	1	1	8.31	0.241	2	26	0.0444	0.0769	2	16	65	unnamed,unnamed	unnamed,unnamed,unnamed,unnamed,unnamed,unnamed,unnamed,unnamed,unnamed,unnamed,unnamed,unnamed,unnamed,unnamed,unnamed,unnamed,unnamed,unnamed,unnamed,unnamed,unnamed,unnamed,unnamed,unnamed,unnamed,unnamed	Brca1,Tipin	Atm,B230120H23Rik,Brca1,Brsk1,Ccnd1,Chek1,Clock,E2f1,Fbxo31,Foxo4,Gm5136,Ints7,Msh2,Rad9,Taok3,Tipin
GO Biological Process	GO:0000077	DNA damage checkpoint	131	0.0237	1	1	8.31	0.241	2	26	0.0444	0.0769	2	16	60	unnamed,unnamed	unnamed,unnamed,unnamed,unnamed,unnamed,unnamed,unnamed,unnamed,unnamed,unnamed,unnamed,unnamed,unnamed,unnamed,unnamed,unnamed,unnamed,unnamed,unnamed,unnamed,unnamed,unnamed,unnamed,unnamed,unnamed,unnamed	Brca1,Tipin	Atm,B230120H23Rik,Brca1,Brsk1,Ccnd1,Chek1,Clock,E2f1,Fbxo31,Foxo4,Gm5136,Ints7,Msh2,Rad9,Taok3,Tipin
GO Biological Process	GO:0044237	cellular metabolic process	133	0.0237	1	1	1.29	24	31	2588	0.689	0.012	27	1367	6562	unnamed,unnamed,unnamed,unnamed,unnamed,unnamed,unnamed,unnamed,unnamed,unnamed,unnamed,unnamed,unnamed,unnamed,unnamed,unnamed,unnamed,unnamed,unnamed,unnamed,unnamed,unnamed,unnamed,unnamed,unnamed,unnamed,unnamed,unnamed,unnamed,unnamed,unnamed	unnamed,unnamed,unnamed,unnamed,unnamed,unnamed,unnamed,unnamed,unnamed,unnamed,unnamed,unnamed,unnamed,unnamed,unnamed,unnamed,unnamed,unnamed,unnamed,unnamed,unnamed,unnamed,unnamed,unnamed,unnamed,unnamed,unnamed,unnamed,unnamed,unnamed,unnamed,unnamed,unnamed,unnamed,unnamed,unnamed,unnamed,unnamed,unnamed,unnamed,unnamed,unnamed,unnamed,unnamed,unnamed,unnamed,unnamed,unnamed,unnamed,unnamed…	Brca1,Chfr,Ctdspl2,Cwh43,Dach1,Dis3l,Dnajb1,Dusp1,Eif4h,Ell3,Gak,Gapdh,Hipk4,Hspa1b,Ide,Il6st,Limk1,Mafg,March5,Ogdhl,Pik3c2b,Ppip5k2,S100b,Sncb,Thoc3,Tipin,mt-Nd4	1500010J02Rik,1500015O10Rik,2310003H01Rik,2410022L05Rik,2510012J08Rik,2610101N10Rik,2700078E11Rik,2810405K02Rik,4921515J06Rik,4933405O20Rik,5430411K18Rik,A1cf,AI314180,AK028549,Aarsd1,Abca8b,Abcb5,Abcb7,Abcc4,Abcg1,Abcg4,Abhd5,Acan,Accsl,Acr,Acsl6,Acvr1b,Adad2,Adam8,Adar,Adat1,Adat2,Adck3,Adcy5,Adcy9,Adi1,Adipor1,Adnp2,Adrb1,Adrbk1,Aes,Aff2,Aff3,Agap1,Agap3,Agk,Agmat,Agpat3,Agpat5,Agphd1,Agtpbp1,…
GO Biological Process	GO:0009056	catabolic process	134	0.0249	1	1	1.89	5.81	11	628	0.244	0.0175	7	271	1243	unnamed,unnamed,unnamed,unnamed,unnamed,unnamed,unnamed,unnamed,unnamed,unnamed,unnamed	unnamed,unnamed,unnamed,unnamed,unnamed,unnamed,unnamed,unnamed,unnamed,unnamed,unnamed,unnamed,unnamed,unnamed,unnamed,unnamed,unnamed,unnamed,unnamed,unnamed,unnamed,unnamed,unnamed,unnamed,unnamed,unnamed,unnamed,unnamed,unnamed,unnamed,unnamed,unnamed,unnamed,unnamed,unnamed,unnamed,unnamed,unnamed,unnamed,unnamed,unnamed,unnamed,unnamed,unnamed,unnamed,unnamed,unnamed,unnamed,unnamed,unnamed…	Chfr,Dis3l,Gapdh,Hspa1b,Ide,Ogdhl,Pld3	1500015O10Rik,2700078E11Rik,4933405O20Rik,5430411K18Rik,AI314180,Abca8b,Abcb5,Abcb7,Abcc4,Abcg1,Abcg4,Acr,Adrb1,Afg3l1,Afg3l2,Agap1,Agap3,Aldh5a1,Arf6,Arih1,Arl3,Arrb1,Aspdh,Asrgl1,Atg4b,Atg7,Atl3,Atm,Atp13a3,Atp5d,Atp5j,Bcat1,Bnip3,Btrc,C77370,Cda,Chfr,Cln8,Colq,Cps1,Crmp1,Cul1,Cul3,Cul4b,Cul5,Cul7,Cyld,Cyp26b1,Cyp26c1,Cyp27b1,Cyp7a1,Daglb,Dcp1b,Dcp2,Ddx25,Decr1,Dera,Dio2,Dis3l,Dnajb9,Dnajc3,Dnm…
GO Biological Process	GO:0051960	regulation of nervous system development	135	0.0259	1	1	2.6	2.31	6	249	0.133	0.0241	5	100	388	unnamed,unnamed,unnamed,unnamed,unnamed,unnamed	unnamed,unnamed,unnamed,unnamed,unnamed,unnamed,unnamed,unnamed,unnamed,unnamed,unnamed,unnamed,unnamed,unnamed,unnamed,unnamed,unnamed,unnamed,unnamed,unnamed,unnamed,unnamed,unnamed,unnamed,unnamed,unnamed,unnamed,unnamed,unnamed,unnamed,unnamed,unnamed,unnamed,unnamed,unnamed,unnamed,unnamed,unnamed,unnamed,unnamed,unnamed,unnamed,unnamed,unnamed,unnamed,unnamed,unnamed,unnamed,unnamed,unnamed…	Gfap,Il6st,Limk1,Nefl,Nefm	App,Arf6,Arhgef2,Aspm,Atf1,Atoh1,Bcl2,Bmp7,Bmpr1a,Ccnd2,Cdh4,Cdk5r1,Cdk5rap2,Cdon,Chn1,Cit,Cntn2,Cntn4,Ctnnb1,D130043K22Rik,Drd2,Efna1,Etv5,Fez1,Fgfr3,Gdf11,Gfap,Ghrl,Grin1,Grm5,Hes1,Hes5,Heyl,Hook3,Hoxd3,Id4,Il6st,Itgb1,Itm2c,Limk1,Lrp6,Lyn,Lzts1,Mt3,Mtap1b,Nbl1,Ncs1,Nefl,Nefm,Nkx2-5,Nlgn3,Nrp1,Ntm,Ntrk2,Ntrk3,Numb,Pax2,Pax6,Pcm1,Pdlim5,Plxna4,Pmp22,Prkca,Psen1,Ptk6,Rapgef4,Rgs6,Rhoa,Robo1,Sall1…
GO Biological Process	GO:0042177	negative regulation of protein catabolic process	136	0.0272	1	1	7.71	0.259	2	28	0.0444	0.0714	2	10	27	unnamed,unnamed	unnamed,unnamed,unnamed,unnamed,unnamed,unnamed,unnamed,unnamed,unnamed,unnamed,unnamed,unnamed,unnamed,unnamed,unnamed,unnamed,unnamed,unnamed,unnamed,unnamed,unnamed,unnamed,unnamed,unnamed,unnamed,unnamed,unnamed,unnamed	Gipc1,Mdm4	Fyn,Gipc1,Grin2a,Grin2c,Mdm4,N4bp1,Ptpn3,Smad4,Timp3,Usp44
GO Biological Process	GO:0060249	anatomical structure homeostasis	137	0.0274	1	1	4.56	0.657	3	71	0.0667	0.0423	2	30	115	unnamed,unnamed,unnamed	unnamed,unnamed,unnamed,unnamed,unnamed,unnamed,unnamed,unnamed,unnamed,unnamed,unnamed,unnamed,unnamed,unnamed,unnamed,unnamed,unnamed,unnamed,unnamed,unnamed,unnamed,unnamed,unnamed,unnamed,unnamed,unnamed,unnamed,unnamed,unnamed,unnamed,unnamed,unnamed,unnamed,unnamed,unnamed,unnamed,unnamed,unnamed,unnamed,unnamed,unnamed,unnamed,unnamed,unnamed,unnamed,unnamed,unnamed,unnamed,unnamed,unnamed…	Cd7,Hspa1b	1500010J02Rik,Ankrd11,Apc,Bbs1,Bbs10,Bbs4,Bcl2,Cbl,Cd7,Ctnnb1,Epas1,Fh1,Haao,Hspa1b,Itgb1,Klhl10,Large,Ldb1,Mtm1,Ncdn,Pinx1,Pthlh,Sash3,Sod1,Stk11,Tep1,Terf1,Tnfsf11,Vegfa,Whrn
GO Biological Process	GO:0048638	regulation of developmental growth	137	0.0274	1	1	4.56	0.657	3	71	0.0667	0.0423	1	24	89	unnamed,unnamed,unnamed	unnamed,unnamed,unnamed,unnamed,unnamed,unnamed,unnamed,unnamed,unnamed,unnamed,unnamed,unnamed,unnamed,unnamed,unnamed,unnamed,unnamed,unnamed,unnamed,unnamed,unnamed,unnamed,unnamed,unnamed,unnamed,unnamed,unnamed,unnamed,unnamed,unnamed,unnamed,unnamed,unnamed,unnamed,unnamed,unnamed,unnamed,unnamed,unnamed,unnamed,unnamed,unnamed,unnamed,unnamed,unnamed,unnamed,unnamed,unnamed,unnamed,unnamed…	Limk1	Adrb1,Ahr,Ar,Cdh4,Dlg1,Fgf9,Fgfr3,Lep,Limk1,Mtap1b,Nkx2-5,Nrp1,Ntrk3,Plcb1,Plxna4,Rps6kb1,Sema3a,Six1,Six4,Slit1,Spp1,Tnr,Ttl,Ulk2
GO Biological Process	GO:0031133	regulation of axon diameter	139	0.0275	1	1	36	0.0278	1	3	0.0222	0.333	2	3	4	unnamed	unnamed,unnamed,unnamed	Nefl,Nefm	Cntn2,Nefl,Nefm
GO Biological Process	GO:0031062	positive regulation of histone methylation	139	0.0275	1	1	36	0.0278	1	3	0.0222	0.333	1	3	8	unnamed	unnamed,unnamed,unnamed	Brca1	Brca1,Jarid2,Paxip1
GO Biological Process	GO:0032536	regulation of cell projection size	139	0.0275	1	1	36	0.0278	1	3	0.0222	0.333	2	3	5	unnamed	unnamed,unnamed,unnamed	Nefl,Nefm	Cntn2,Nefl,Nefm
GO Biological Process	GO:0031060	regulation of histone methylation	139	0.0275	1	1	36	0.0278	1	3	0.0222	0.333	1	3	14	unnamed	unnamed,unnamed,unnamed	Brca1	Brca1,Jarid2,Paxip1
GO Biological Process	GO:0046784	intronless viral mRNA export from host nucleus	139	0.0275	1	1	36	0.0278	1	3	0.0222	0.333	1	2	6	unnamed	unnamed,unnamed,unnamed	Thoc3	Thoc3,Thoc5
GO Biological Process	GO:0046356	acetyl-CoA catabolic process	139	0.0275	1	1	36	0.0278	1	3	0.0222	0.333	1	3	26	unnamed	unnamed,unnamed,unnamed	Ogdhl	4933405O20Rik,Fh1,Ogdhl
GO Biological Process	GO:0042026	protein refolding	139	0.0275	1	1	36	0.0278	1	3	0.0222	0.333	1	3	7	unnamed	unnamed,unnamed,unnamed	Dnajb1	Dnajb1,Hsp90aa1,Hspd1
GO Biological Process	GO:2000615	regulation of histone H3-K9 acetylation	139	0.0275	1	1	36	0.0278	1	3	0.0222	0.333	1	2	2	unnamed	unnamed,unnamed,unnamed	Brca1	Brca1,Chek1
GO Biological Process	GO:0006099	tricarboxylic acid cycle	139	0.0275	1	1	36	0.0278	1	3	0.0222	0.333	1	3	25	unnamed	unnamed,unnamed,unnamed	Ogdhl	4933405O20Rik,Fh1,Ogdhl
GO Biological Process	GO:0031057	negative regulation of histone modification	139	0.0275	1	1	36	0.0278	1	3	0.0222	0.333	1	3	15	unnamed	unnamed,unnamed,unnamed	Brca1	Brca1,Jarid2,Ube2b
GO Biological Process	GO:0006368	transcription elongation from RNA polymerase II promoter	139	0.0275	1	1	36	0.0278	1	3	0.0222	0.333	1	2	10	unnamed	unnamed,unnamed,unnamed	Ell3	Ell3,Tceb3
GO Biological Process	GO:0001706	endoderm formation	139	0.0275	1	1	36	0.0278	1	3	0.0222	0.333	1	3	18	unnamed	unnamed,unnamed,unnamed	Dusp1	Ctnnb1,Dusp1,Dusp4
GO Biological Process	GO:0030224	monocyte differentiation	139	0.0275	1	1	36	0.0278	1	3	0.0222	0.333	1	2	8	unnamed	unnamed,unnamed,unnamed	Il31ra	Il31ra,Thoc5
GO Biological Process	GO:0010972	negative regulation of G2/M transition of mitotic cell cycle	139	0.0275	1	1	36	0.0278	1	3	0.0222	0.333	1	2	8	unnamed	unnamed,unnamed,unnamed	Tipin	Tipin,Usp47
GO Biological Process	GO:0006642	triglyceride mobilization	139	0.0275	1	1	36	0.0278	1	3	0.0222	0.333	1	2	6	unnamed	unnamed,unnamed,unnamed	Il6st	Il6st,Lpin1
GO Biological Process	GO:0010769	regulation of cell morphogenesis involved in differentiation	154	0.029	1	1	3.4	1.18	4	127	0.0889	0.0315	3	42	148	unnamed,unnamed,unnamed,unnamed	unnamed,unnamed,unnamed,unnamed,unnamed,unnamed,unnamed,unnamed,unnamed,unnamed,unnamed,unnamed,unnamed,unnamed,unnamed,unnamed,unnamed,unnamed,unnamed,unnamed,unnamed,unnamed,unnamed,unnamed,unnamed,unnamed,unnamed,unnamed,unnamed,unnamed,unnamed,unnamed,unnamed,unnamed,unnamed,unnamed,unnamed,unnamed,unnamed,unnamed,unnamed,unnamed,unnamed,unnamed,unnamed,unnamed,unnamed,unnamed,unnamed,unnamed…	Limk1,Nefl,Nefm	Axin2,Cdh4,Cdk5r1,Chn1,Cit,Cntn2,Ctnnb1,Efna1,Epb4.1l5,Grin1,Limk1,Lzts1,Mtap1b,Nefl,Nefm,Nrp1,Ntrk3,Numb,Pax2,Pax8,Pdlim5,Plxna4,Ppp2ca,Psen1,Robo1,Sema3a,Sema4d,Sipa1l1,Slit1,Slit2,Smad2,Smad4,Spp1,Ssh1,Ssh2,Stk11,Tnik,Tnr,Ttl,Ulk2,Ywhah,Zfp703
GO Biological Process	GO:0008152	metabolic process	155	0.0292	1	1	1.25	26.4	33	2849	0.733	0.0116	33	1539	7717	unnamed,unnamed,unnamed,unnamed,unnamed,unnamed,unnamed,unnamed,unnamed,unnamed,unnamed,unnamed,unnamed,unnamed,unnamed,unnamed,unnamed,unnamed,unnamed,unnamed,unnamed,unnamed,unnamed,unnamed,unnamed,unnamed,unnamed,unnamed,unnamed,unnamed,unnamed,unnamed,unnamed	unnamed,unnamed,unnamed,unnamed,unnamed,unnamed,unnamed,unnamed,unnamed,unnamed,unnamed,unnamed,unnamed,unnamed,unnamed,unnamed,unnamed,unnamed,unnamed,unnamed,unnamed,unnamed,unnamed,unnamed,unnamed,unnamed,unnamed,unnamed,unnamed,unnamed,unnamed,unnamed,unnamed,unnamed,unnamed,unnamed,unnamed,unnamed,unnamed,unnamed,unnamed,unnamed,unnamed,unnamed,unnamed,unnamed,unnamed,unnamed,unnamed,unnamed…	Brca1,Chfr,Ctdspl2,Cwh43,Dach1,Dip2a,Dis3l,Dnajb1,Dusp1,Eif4h,Ell3,Gak,Gapdh,Hipk4,Hspa1b,Ide,Il6st,Limk1,Mafg,March5,Neu1,Ogdhl,Pdia3,Pik3c2b,Pld3,Ppip5k2,Ppm1h,S100b,Sncb,Thoc3,Tipin,Txnrd2,mt-Nd4	1500010J02Rik,1500015O10Rik,2310003H01Rik,2410022L05Rik,2510012J08Rik,2610101N10Rik,2700078E11Rik,2810405K02Rik,4921515J06Rik,4930444G20Rik,4931440L10Rik,4933405O20Rik,5430411K18Rik,A1cf,AF366264,AI314180,AK028549,Aarsd1,Aasdhppt,Abca8b,Abcb5,Abcb7,Abcc4,Abcg1,Abcg4,Abhd5,Abhd6,Acad9,Acan,Acat1,Acbd3,Accsl,Acr,Acsl6,Acvr1b,Adad2,Adam17,Adam19,Adam23,Adam33,Adam8,Adamts19,Adamts3,Adamts4,Adar,Adat…
GO Biological Process	GO:0048518	positive regulation of biological process	156	0.0299	1	1	1.52	11.8	18	1275	0.4	0.0141	15	575	2632	unnamed,unnamed,unnamed,unnamed,unnamed,unnamed,unnamed,unnamed,unnamed,unnamed,unnamed,unnamed,unnamed,unnamed,unnamed,unnamed,unnamed,unnamed	unnamed,unnamed,unnamed,unnamed,unnamed,unnamed,unnamed,unnamed,unnamed,unnamed,unnamed,unnamed,unnamed,unnamed,unnamed,unnamed,unnamed,unnamed,unnamed,unnamed,unnamed,unnamed,unnamed,unnamed,unnamed,unnamed,unnamed,unnamed,unnamed,unnamed,unnamed,unnamed,unnamed,unnamed,unnamed,unnamed,unnamed,unnamed,unnamed,unnamed,unnamed,unnamed,unnamed,unnamed,unnamed,unnamed,unnamed,unnamed,unnamed,unnamed…	Brca1,Dusp1,Ell3,Gfap,Gipc1,Il31ra,Il6st,Limk1,March5,Mdm4,Nefl,Pdia3,S100b,Tipin,Tnfrsf11a	1500010J02Rik,2810002N01Rik,AK028549,Abcg1,Abcg4,Abhd5,Ablim1,Acvr1b,Adam17,Adam8,Adnp2,Adrb1,Adrbk1,Afap1l2,Agap2,Ahr,Aifm3,Akt2,Amph,Apbb2,Apc,Apoa1,App,Ar,Arap1,Arf6,Arhgap5,Arl2bp,Arnt2,Arpp19,Arrb1,Asns,Atf1,Atf2,Atf3,Atg4b,Atg7,Atm,Atoh1,Atxn1,Axin2,B230120H23Rik,BC096441,Bag1,Baz1b,Bbs4,Bcl10,Bcl2,Bcl2l11,Bcr,Bhlha15,Bhlhe23,Bicd1,Bmp7,Bmpr1a,Bmpr1b,Bmpr2,Bnip1,Bnip3,Braf,Brca1,Brd4,Btrc,B…
GO Biological Process	GO:0030072	peptide hormone secretion	157	0.0309	1	1	7.2	0.278	2	30	0.0444	0.0667	1	13	44	unnamed,unnamed	unnamed,unnamed,unnamed,unnamed,unnamed,unnamed,unnamed,unnamed,unnamed,unnamed,unnamed,unnamed,unnamed,unnamed,unnamed,unnamed,unnamed,unnamed,unnamed,unnamed,unnamed,unnamed,unnamed,unnamed,unnamed,unnamed,unnamed,unnamed,unnamed,unnamed	Cplx1	Cplx1,Dio2,Htt,Lep,Mafa,Pclo,Rapgef4,Rims2,Slc18a2,Smad2,Smpd3,Snap25,Vgf
GO Biological Process	GO:0002790	peptide secretion	157	0.0309	1	1	7.2	0.278	2	30	0.0444	0.0667	1	13	47	unnamed,unnamed	unnamed,unnamed,unnamed,unnamed,unnamed,unnamed,unnamed,unnamed,unnamed,unnamed,unnamed,unnamed,unnamed,unnamed,unnamed,unnamed,unnamed,unnamed,unnamed,unnamed,unnamed,unnamed,unnamed,unnamed,unnamed,unnamed,unnamed,unnamed,unnamed,unnamed	Cplx1	Cplx1,Dio2,Htt,Lep,Mafa,Pclo,Rapgef4,Rims2,Slc18a2,Smad2,Smpd3,Snap25,Vgf
GO Biological Process	GO:0015833	peptide transport	157	0.0309	1	1	7.2	0.278	2	30	0.0444	0.0667	1	13	59	unnamed,unnamed	unnamed,unnamed,unnamed,unnamed,unnamed,unnamed,unnamed,unnamed,unnamed,unnamed,unnamed,unnamed,unnamed,unnamed,unnamed,unnamed,unnamed,unnamed,unnamed,unnamed,unnamed,unnamed,unnamed,unnamed,unnamed,unnamed,unnamed,unnamed,unnamed,unnamed	Cplx1	Cplx1,Dio2,Htt,Lep,Mafa,Pclo,Rapgef4,Rims2,Slc18a2,Smad2,Smpd3,Snap25,Vgf
GO Biological Process	GO:0033365	protein localization to organelle	160	0.0313	1	1	3.32	1.2	4	130	0.0889	0.0308	1	54	211	unnamed,unnamed,unnamed,unnamed	unnamed,unnamed,unnamed,unnamed,unnamed,unnamed,unnamed,unnamed,unnamed,unnamed,unnamed,unnamed,unnamed,unnamed,unnamed,unnamed,unnamed,unnamed,unnamed,unnamed,unnamed,unnamed,unnamed,unnamed,unnamed,unnamed,unnamed,unnamed,unnamed,unnamed,unnamed,unnamed,unnamed,unnamed,unnamed,unnamed,unnamed,unnamed,unnamed,unnamed,unnamed,unnamed,unnamed,unnamed,unnamed,unnamed,unnamed,unnamed,unnamed,unnamed…	2012-03-05	Ankrd13c,Arap1,Arl2bp,Bbs4,Bicd1,Bmp7,Cep57,Cog3,Fgf9,Get4,Hes1,Hook3,Hsp90aa1,Hspa4,Htt,Immp2l,Ipo5,Ipo9,Kdelr2,Kpna3,Kpna4,Kpnb1,March5,Mtx2,Mtx3,Nfkbia,Oprd1,Optn,Os9,Pax6,Pcm1,Pex14,Pex19,Pex5l,Pex7,Ppp3ca,Rpl11,Samm50,Scarb2,Six1,Snupn,Snx16,Srp19,Tcf7l2,Tnks,Tnks2,Tnpo3,Tob1,Tomm20,Trip11,Wapal,Ywhaz,Zfp828,Zfyve9
GO Biological Process	GO:0031099	regeneration	161	0.0329	1	1	6.97	0.287	2	31	0.0444	0.0645	2	19	115	unnamed,unnamed	unnamed,unnamed,unnamed,unnamed,unnamed,unnamed,unnamed,unnamed,unnamed,unnamed,unnamed,unnamed,unnamed,unnamed,unnamed,unnamed,unnamed,unnamed,unnamed,unnamed,unnamed,unnamed,unnamed,unnamed,unnamed,unnamed,unnamed,unnamed,unnamed,unnamed,unnamed	Gfap,Nefl	Bcl2,Ccnd1,Gap43,Gfap,Gstp1,Hgf,Hmbs,Ina,Lifr,Lpin1,Mtap1b,Nefl,Nnmt,Notch2,Nrf1,Pfkfb1,Serpina10,Timp3,Tspo
GO Biological Process	GO:0043086	negative regulation of catalytic activity	162	0.0335	1	1	2.76	1.81	5	196	0.111	0.0255	3	75	413	unnamed,unnamed,unnamed,unnamed,unnamed	unnamed,unnamed,unnamed,unnamed,unnamed,unnamed,unnamed,unnamed,unnamed,unnamed,unnamed,unnamed,unnamed,unnamed,unnamed,unnamed,unnamed,unnamed,unnamed,unnamed,unnamed,unnamed,unnamed,unnamed,unnamed,unnamed,unnamed,unnamed,unnamed,unnamed,unnamed,unnamed,unnamed,unnamed,unnamed,unnamed,unnamed,unnamed,unnamed,unnamed,unnamed,unnamed,unnamed,unnamed,unnamed,unnamed,unnamed,unnamed,unnamed,unnamed…	Dusp1,Hspa1b,Limk1	Adcy5,Akt2,Apc,Apoa1,App,Arrb1,Bag5,Bmp7,Cand1,Cd46,Cdkn1b,Chordc1,Cln8,Col28a1,Crim1,Cyp27b1,Dab2ip,Drd2,Dusp1,Dusp19,Dusp3,Dusp4,Dusp8,Dusp9,Fkbp1a,Gabbr1,Gnaq,Gstp1,Hipk3,Hmgcr,Hspa1b,Hspb1,Irs2,Lax1,Limk1,Lrp6,Lxn,Mastl,Naip1,Nos1,Oaz2-ps,Oprd1,Oxa1l,Papln,Pax2,Pcid2,Pcsk1n,Pebp1,Prdx5,Prkca,Psen1,Ptprn2,Pxk,Rgs2,Rps6ka3,S1pr3,Serpina10,Serpinc1,Serping1,Serpini1,Sfn,Spink4,Spred1,Spred2,Spry…
GO Biological Process	GO:0046486	glycerolipid metabolic process	163	0.0337	1	1	4.21	0.713	3	77	0.0667	0.039	3	40	183	unnamed,unnamed,unnamed	unnamed,unnamed,unnamed,unnamed,unnamed,unnamed,unnamed,unnamed,unnamed,unnamed,unnamed,unnamed,unnamed,unnamed,unnamed,unnamed,unnamed,unnamed,unnamed,unnamed,unnamed,unnamed,unnamed,unnamed,unnamed,unnamed,unnamed,unnamed,unnamed,unnamed,unnamed,unnamed,unnamed,unnamed,unnamed,unnamed,unnamed,unnamed,unnamed,unnamed,unnamed,unnamed,unnamed,unnamed,unnamed,unnamed,unnamed,unnamed,unnamed,unnamed…	Cwh43,Il6st,Pik3c2b	Abhd5,Agpat5,Aldh5a1,Apoa1,Cdipt,Chka,Cps1,Cwh43,Dpm1,Drd2,Fabp3,G6pc,Galr2,Htr2a,Il6st,Ip6k2,Lpin1,Lpl,Mtm1,Pcyt1a,Pcyt1b,Pex7,Pgap2,Pigg,Pigm,Pign,Pigo,Pigs,Pik3c2b,Pik3c3,Pik3ca,Pik3cd,Pip4k2a,Pla2g1b,Plcb1,Plch2,Pon1,Ppap2a,Slc27a1,Synj2
GO Biological Process	GO:0006112	energy reserve metabolic process	164	0.0349	1	1	6.75	0.296	2	32	0.0444	0.0625	2	13	54	unnamed,unnamed	unnamed,unnamed,unnamed,unnamed,unnamed,unnamed,unnamed,unnamed,unnamed,unnamed,unnamed,unnamed,unnamed,unnamed,unnamed,unnamed,unnamed,unnamed,unnamed,unnamed,unnamed,unnamed,unnamed,unnamed,unnamed,unnamed,unnamed,unnamed,unnamed,unnamed,unnamed,unnamed	Il6st,S100b	Adrb1,Akt2,Cps1,Epm2a,G6pc,Gnmt,Il6st,Lep,Phkb,Ppp1cb,Ppp1r3e,Ppp3r2,S100b
GO Biological Process	GO:0045333	cellular respiration	164	0.0349	1	1	6.75	0.296	2	32	0.0444	0.0625	2	17	73	unnamed,unnamed	unnamed,unnamed,unnamed,unnamed,unnamed,unnamed,unnamed,unnamed,unnamed,unnamed,unnamed,unnamed,unnamed,unnamed,unnamed,unnamed,unnamed,unnamed,unnamed,unnamed,unnamed,unnamed,unnamed,unnamed,unnamed,unnamed,unnamed,unnamed,unnamed,unnamed,unnamed,unnamed	Ogdhl,mt-Nd4	4933405O20Rik,Aldh5a1,Cox10,Dld,Fastkd2,Fh1,Ncaph2,Ndufs1,Ndufs4,Ogdhl,Oxa1l,Ppargc1a,Slc25a12,Slc25a13,Tymp,Uqcr10,mt-Nd4
GO Biological Process	GO:0048167	regulation of synaptic plasticity	166	0.036	1	1	4.1	0.731	3	79	0.0667	0.038	3	32	84	unnamed,unnamed,unnamed	unnamed,unnamed,unnamed,unnamed,unnamed,unnamed,unnamed,unnamed,unnamed,unnamed,unnamed,unnamed,unnamed,unnamed,unnamed,unnamed,unnamed,unnamed,unnamed,unnamed,unnamed,unnamed,unnamed,unnamed,unnamed,unnamed,unnamed,unnamed,unnamed,unnamed,unnamed,unnamed,unnamed,unnamed,unnamed,unnamed,unnamed,unnamed,unnamed,unnamed,unnamed,unnamed,unnamed,unnamed,unnamed,unnamed,unnamed,unnamed,unnamed,unnamed…	Gfap,Gipc1,S100b	Abhd6,Bcan,Calb1,Cntn2,Cpeb1,Cplx2,Dlg4,Drd2,Egr2,Gfap,Gipc1,Grik2,Grin1,Grin2a,Grin2b,Grin2c,Grm5,Htt,Kras,Mtap1b,Ncdn,Neto1,Ppfia3,Psen1,Rab11a,Rims1,S100b,Shank3,Tnr,Unc13a,Vgf,Ywhag
GO Biological Process	GO:0045664	regulation of neuron differentiation	167	0.0361	1	1	2.7	1.85	5	200	0.111	0.025	4	80	287	unnamed,unnamed,unnamed,unnamed,unnamed	unnamed,unnamed,unnamed,unnamed,unnamed,unnamed,unnamed,unnamed,unnamed,unnamed,unnamed,unnamed,unnamed,unnamed,unnamed,unnamed,unnamed,unnamed,unnamed,unnamed,unnamed,unnamed,unnamed,unnamed,unnamed,unnamed,unnamed,unnamed,unnamed,unnamed,unnamed,unnamed,unnamed,unnamed,unnamed,unnamed,unnamed,unnamed,unnamed,unnamed,unnamed,unnamed,unnamed,unnamed,unnamed,unnamed,unnamed,unnamed,unnamed,unnamed…	Gfap,Limk1,Nefl,Nefm	App,Arf6,Aspm,Atf1,Atoh1,Bcl2,Bmp7,Ccnd2,Cdh4,Cdk5r1,Cdk5rap2,Cdon,Chn1,Cit,Cntn2,Cntn4,D130043K22Rik,Efna1,Etv5,Fez1,Gdf11,Gfap,Grin1,Hes1,Hes5,Heyl,Hoxd3,Id4,Itgb1,Itm2c,Limk1,Lyn,Lzts1,Mtap1b,Nbl1,Ncs1,Nefl,Nefm,Nkx2-5,Nrp1,Ntm,Ntrk2,Ntrk3,Numb,Pax6,Pdlim5,Plxna4,Pmp22,Psen1,Ptk6,Rapgef4,Rgs6,Rhoa,Robo1,Sall1,Sema3a,Sema4d,Sipa1l1,Six1,Slit1,Slit2,Sox11,Sox3,Sox5,Spag9,Spp1,Ssh1,Ssh2,Stk11,Stm…
GO Biological Process	GO:0031573	intra-S DNA damage checkpoint	168	0.0365	1	1	27	0.037	1	4	0.0222	0.25	1	2	5	unnamed	unnamed,unnamed,unnamed,unnamed	Tipin	Msh2,Tipin
GO Biological Process	GO:0048708	astrocyte differentiation	168	0.0365	1	1	27	0.037	1	4	0.0222	0.25	1	4	24	unnamed	unnamed,unnamed,unnamed,unnamed	Gfap	Gfap,Hes5,Hmbs,Pax6
GO Biological Process	GO:0051481	reduction of cytosolic calcium ion concentration	168	0.0365	1	1	27	0.037	1	4	0.0222	0.25	1	3	6	unnamed	unnamed,unnamed,unnamed,unnamed	Il6st	Drd2,Il6st,Kcna5
GO Biological Process	GO:0045739	positive regulation of DNA repair	168	0.0365	1	1	27	0.037	1	4	0.0222	0.25	1	4	25	unnamed	unnamed,unnamed,unnamed,unnamed	Brca1	Brca1,Gm5136,Rnf168,Ube2n
GO Biological Process	GO:0048489	synaptic vesicle transport	172	0.039	1	1	6.35	0.315	2	34	0.0444	0.0588	1	13	45	unnamed,unnamed	unnamed,unnamed,unnamed,unnamed,unnamed,unnamed,unnamed,unnamed,unnamed,unnamed,unnamed,unnamed,unnamed,unnamed,unnamed,unnamed,unnamed,unnamed,unnamed,unnamed,unnamed,unnamed,unnamed,unnamed,unnamed,unnamed,unnamed,unnamed,unnamed,unnamed,unnamed,unnamed,unnamed,unnamed	Cplx1	Amph,Cplx1,Cplx2,Ctnnb1,Dlg4,Lin7a,Ophn1,Pclo,Psen1,Slc18a2,Stx4a,Unc13a,Zdhhc15
GO Biological Process	GO:0031647	regulation of protein stability	172	0.039	1	1	6.35	0.315	2	34	0.0444	0.0588	2	18	76	unnamed,unnamed	unnamed,unnamed,unnamed,unnamed,unnamed,unnamed,unnamed,unnamed,unnamed,unnamed,unnamed,unnamed,unnamed,unnamed,unnamed,unnamed,unnamed,unnamed,unnamed,unnamed,unnamed,unnamed,unnamed,unnamed,unnamed,unnamed,unnamed,unnamed,unnamed,unnamed,unnamed,unnamed,unnamed,unnamed	Gipc1,Mdm4	A1cf,Apbb2,Apoa1,Bcl2,Btrc,Cog3,Fbxo7,Fbxw11,Gipc1,Gnaq,Gtpbp4,Hspd1,Mdm4,Nckap1,Pim1,Stx12,Ube2b,Wfs1
GO Biological Process	GO:0006796	phosphate-containing compound metabolic process	174	0.0392	1	1	1.77	6.23	11	673	0.244	0.0163	8	279	1138	unnamed,unnamed,unnamed,unnamed,unnamed,unnamed,unnamed,unnamed,unnamed,unnamed,unnamed	unnamed,unnamed,unnamed,unnamed,unnamed,unnamed,unnamed,unnamed,unnamed,unnamed,unnamed,unnamed,unnamed,unnamed,unnamed,unnamed,unnamed,unnamed,unnamed,unnamed,unnamed,unnamed,unnamed,unnamed,unnamed,unnamed,unnamed,unnamed,unnamed,unnamed,unnamed,unnamed,unnamed,unnamed,unnamed,unnamed,unnamed,unnamed,unnamed,unnamed,unnamed,unnamed,unnamed,unnamed,unnamed,unnamed,unnamed,unnamed,unnamed,unnamed…	Ctdspl2,Dusp1,Gak,Hipk4,Limk1,Pik3c2b,Ppip5k2,mt-Nd4	Acvr1b,Adam8,Adck3,Adrbk1,Agk,Agphd1,Ak8,Akap13,Akap4,Akap6,Akt2,Akt3,Alpk2,Ankk1,App,Atm,B230120H23Rik,Baz1b,Bcl2,Bcr,Bmp7,Bmpr1a,Bmpr1b,Bmpr2,Braf,Brd4,Brsk1,Btrc,Camk2d,Camk4,Camkk2,Cbl,Ccnd1,Ccnh,Ccnt1,Cdc42bpa,Cdk14,Cdk5r1,Cdk7,Cdk8,Cdkl1,Cfl1,Chek1,Chka,Cit,Ckm,Ckmt2,Clk1,Clk2,Cmpk1,Cmpk2,Col4a3bp,Crk,Csnk1a1,Csnk1g2,Csnk2a1,Csnk2a2,Ctdspl2,D8Ertd82e,Dclk1,Dgkb,Dgke,Dgkg,Dld,Dolk,Dtymk,Dusp…
GO Biological Process	GO:0090066	regulation of anatomical structure size	175	0.0395	1	1	3.09	1.3	4	140	0.0889	0.0286	3	53	203	unnamed,unnamed,unnamed,unnamed	unnamed,unnamed,unnamed,unnamed,unnamed,unnamed,unnamed,unnamed,unnamed,unnamed,unnamed,unnamed,unnamed,unnamed,unnamed,unnamed,unnamed,unnamed,unnamed,unnamed,unnamed,unnamed,unnamed,unnamed,unnamed,unnamed,unnamed,unnamed,unnamed,unnamed,unnamed,unnamed,unnamed,unnamed,unnamed,unnamed,unnamed,unnamed,unnamed,unnamed,unnamed,unnamed,unnamed,unnamed,unnamed,unnamed,unnamed,unnamed,unnamed,unnamed…	Limk1,Nefl,Nefm	Actr3b,Add2,Adra1d,Adrb1,Ahr,Arf6,Arhgap5,Arpc3,Arpc5,Calca,Calcb,Capza2,Cdh4,Cfl1,Cln8,Cntn2,Dlg1,Dstn,Fert2,Foxs1,Gch1,Gclc,Gclm,Jmy,Kcnma1,Limk1,Mtap1b,Nck1,Nefl,Nefm,Nppa,Nppc,Nrp1,Ntrk3,P2rx4,Pak3,Pax2,Pfn2,Plxna4,Rasa1,Rb1cc1,Sema3a,Slit1,Slit2,Sod1,Spna2,Spp1,Ssh1,Ssh2,Tnr,Ttl,Ulk2,Vil1
GO Biological Process	GO:0032956	regulation of actin cytoskeleton organization	176	0.0408	1	1	3.9	0.769	3	83	0.0667	0.0361	1	32	125	unnamed,unnamed,unnamed	unnamed,unnamed,unnamed,unnamed,unnamed,unnamed,unnamed,unnamed,unnamed,unnamed,unnamed,unnamed,unnamed,unnamed,unnamed,unnamed,unnamed,unnamed,unnamed,unnamed,unnamed,unnamed,unnamed,unnamed,unnamed,unnamed,unnamed,unnamed,unnamed,unnamed,unnamed,unnamed,unnamed,unnamed,unnamed,unnamed,unnamed,unnamed,unnamed,unnamed,unnamed,unnamed,unnamed,unnamed,unnamed,unnamed,unnamed,unnamed,unnamed,unnamed…	Limk1	Actr3b,Add2,Arap1,Arf6,Arpc3,Arpc5,Capza2,Cdk5r1,Cfl1,Crk,Dlg1,Dstn,Efna5,Epha5,Fert2,Gpr65,Jmy,Limk1,Nck1,Pak3,Pfn2,Rasa1,Rhoa,Slit2,Spna2,Ssh1,Ssh2,Synpo,Tac1,Vangl2,Vil1,Wnt11
GO Biological Process	GO:0032970	regulation of actin filament-based process	176	0.0408	1	1	3.9	0.769	3	83	0.0667	0.0361	1	32	128	unnamed,unnamed,unnamed	unnamed,unnamed,unnamed,unnamed,unnamed,unnamed,unnamed,unnamed,unnamed,unnamed,unnamed,unnamed,unnamed,unnamed,unnamed,unnamed,unnamed,unnamed,unnamed,unnamed,unnamed,unnamed,unnamed,unnamed,unnamed,unnamed,unnamed,unnamed,unnamed,unnamed,unnamed,unnamed,unnamed,unnamed,unnamed,unnamed,unnamed,unnamed,unnamed,unnamed,unnamed,unnamed,unnamed,unnamed,unnamed,unnamed,unnamed,unnamed,unnamed,unnamed…	Limk1	Actr3b,Add2,Arap1,Arf6,Arpc3,Arpc5,Capza2,Cdk5r1,Cfl1,Crk,Dlg1,Dstn,Efna5,Epha5,Fert2,Gpr65,Jmy,Limk1,Nck1,Pak3,Pfn2,Rasa1,Rhoa,Slit2,Spna2,Ssh1,Ssh2,Synpo,Tac1,Vangl2,Vil1,Wnt11
GO Biological Process	GO:0042981	regulation of apoptosis	178	0.0412	1	1	2.01	3.98	8	430	0.178	0.0186	8	198	895	unnamed,unnamed,unnamed,unnamed,unnamed,unnamed,unnamed,unnamed	unnamed,unnamed,unnamed,unnamed,unnamed,unnamed,unnamed,unnamed,unnamed,unnamed,unnamed,unnamed,unnamed,unnamed,unnamed,unnamed,unnamed,unnamed,unnamed,unnamed,unnamed,unnamed,unnamed,unnamed,unnamed,unnamed,unnamed,unnamed,unnamed,unnamed,unnamed,unnamed,unnamed,unnamed,unnamed,unnamed,unnamed,unnamed,unnamed,unnamed,unnamed,unnamed,unnamed,unnamed,unnamed,unnamed,unnamed,unnamed,unnamed,unnamed…	Brca1,Dusp1,Hspa1b,Mdm4,Nefl,Pdia3,S100b,Sncb	2810002N01Rik,AK028549,Adam17,Adam8,Adar,Agap2,Aifm3,Akt2,Ank2,Ankrd13c,Apbb2,Apc,App,Ar,Arhgap10,Arnt2,Asns,Atg7,Atm,Aven,B230120H23Rik,Bag1,Bag3,Bag4,Barhl1,Bcl10,Bcl2,Bcl2l10,Bcl2l11,Bcl2l14,Bmp7,Bnip1,Bnip3,Braf,Brca1,C6,Cbl,Cd44,Cdk5r1,Cdkn1b,Chst11,Cln8,Crh,Csrnp3,Ctnnb1,Cul7,Cx3cl1,Cyr61,Dab2ip,Dedd2,Diablo,Dusp1,Dyrk2,Eef1a2,Efhc1,Ercc3,Ern1,Fasl,Fgfr3,Fn1,Fnta,Foxs1,Frzb,G630025P09Rik,Gc…
GO Biological Process	GO:0001558	regulation of cell growth	179	0.0413	1	1	3.04	1.31	4	142	0.0889	0.0282	2	54	223	unnamed,unnamed,unnamed,unnamed	unnamed,unnamed,unnamed,unnamed,unnamed,unnamed,unnamed,unnamed,unnamed,unnamed,unnamed,unnamed,unnamed,unnamed,unnamed,unnamed,unnamed,unnamed,unnamed,unnamed,unnamed,unnamed,unnamed,unnamed,unnamed,unnamed,unnamed,unnamed,unnamed,unnamed,unnamed,unnamed,unnamed,unnamed,unnamed,unnamed,unnamed,unnamed,unnamed,unnamed,unnamed,unnamed,unnamed,unnamed,unnamed,unnamed,unnamed,unnamed,unnamed,unnamed…	Hspa1b,Limk1	Adam17,Adnp2,Adrb1,Apbb2,Bcl2,Bmpr2,Cda,Cdh4,Cdkn1b,Crim1,Ctgf,Cyp27b1,Cyr61,Dab2ip,Dcbld2,Extl3,Frzb,Gng4,Hsd3b7,Hspa1b,Htra1,Ino80,Ip6k2,Limk1,Mtap1b,Ndn,Ndufa13,Nppa,Nrp1,Ntrk3,Plxna4,Sbf1,Sema3a,Sfn,Slit1,Slit2,Slit3,Smad4,Sphk1,Spp1,St7l,Stk11,Supv3l1,Tgfb2,Tnr,Trim32,Tro,Tspyl2,Ttl,Ucn,Ulk2,Usp47,Wnt11,Zc3h12d
GO Biological Process	GO:0019221	cytokine-mediated signaling pathway	180	0.0433	1	1	6	0.333	2	36	0.0444	0.0556	2	19	116	unnamed,unnamed	unnamed,unnamed,unnamed,unnamed,unnamed,unnamed,unnamed,unnamed,unnamed,unnamed,unnamed,unnamed,unnamed,unnamed,unnamed,unnamed,unnamed,unnamed,unnamed,unnamed,unnamed,unnamed,unnamed,unnamed,unnamed,unnamed,unnamed,unnamed,unnamed,unnamed,unnamed,unnamed,unnamed,unnamed,unnamed,unnamed	Il6st,Tnfrsf11a	Cx3cl1,Cxcl13,Fkbp1a,Gm614,Il12rb2,Il5ra,Il6st,Irak1,Lep,Lifr,Plcb1,Rps6ka5,Rqcd1,Slc27a1,Stat1,Tnfrsf11a,Tnfsf11,Traf3,Zc3h15
GO Biological Process	GO:0014013	regulation of gliogenesis	180	0.0433	1	1	6	0.333	2	36	0.0444	0.0556	2	14	60	unnamed,unnamed	unnamed,unnamed,unnamed,unnamed,unnamed,unnamed,unnamed,unnamed,unnamed,unnamed,unnamed,unnamed,unnamed,unnamed,unnamed,unnamed,unnamed,unnamed,unnamed,unnamed,unnamed,unnamed,unnamed,unnamed,unnamed,unnamed,unnamed,unnamed,unnamed,unnamed,unnamed,unnamed,unnamed,unnamed,unnamed,unnamed	Gfap,Il6st	Cntn2,Ctnnb1,Etv5,Fgfr3,Gfap,Hes1,Hes5,Id4,Il6st,Lyn,Ntrk3,Sox11,Tcf7l2,Tspo
GO Biological Process	GO:0043067	regulation of programmed cell death	182	0.0437	1	1	1.99	4.03	8	435	0.178	0.0184	8	201	904	unnamed,unnamed,unnamed,unnamed,unnamed,unnamed,unnamed,unnamed	unnamed,unnamed,unnamed,unnamed,unnamed,unnamed,unnamed,unnamed,unnamed,unnamed,unnamed,unnamed,unnamed,unnamed,unnamed,unnamed,unnamed,unnamed,unnamed,unnamed,unnamed,unnamed,unnamed,unnamed,unnamed,unnamed,unnamed,unnamed,unnamed,unnamed,unnamed,unnamed,unnamed,unnamed,unnamed,unnamed,unnamed,unnamed,unnamed,unnamed,unnamed,unnamed,unnamed,unnamed,unnamed,unnamed,unnamed,unnamed,unnamed,unnamed…	Brca1,Dusp1,Hspa1b,Mdm4,Nefl,Pdia3,S100b,Sncb	2810002N01Rik,AK028549,Adam17,Adam8,Adar,Agap2,Aifm3,Akt2,Ank2,Ankrd13c,Apbb2,Apc,App,Ar,Arhgap10,Arnt2,Asns,Atg7,Atm,Aven,B230120H23Rik,Bag1,Bag3,Bag4,Barhl1,Bcl10,Bcl2,Bcl2l10,Bcl2l11,Bcl2l14,Bhlhe23,Bmp7,Bnip1,Bnip3,Braf,Brca1,C6,Cbl,Cd44,Cdk5r1,Cdkn1b,Chst11,Cln8,Crh,Csrnp3,Ctnnb1,Cul7,Cx3cl1,Cyr61,Dab2ip,Dedd2,Diablo,Dusp1,Dyrk2,Eef1a2,Efhc1,Ercc3,Ern1,Fasl,Fgfr3,Fn1,Fnta,Foxs1,Frzb,G630025P…
GO Biological Process	GO:0048711	positive regulation of astrocyte differentiation	183	0.0455	1	1	21.6	0.0463	1	5	0.0222	0.2	1	2	8	unnamed	unnamed,unnamed,unnamed,unnamed,unnamed	Il6st	Hes1,Il6st
GO Biological Process	GO:0045687	positive regulation of glial cell differentiation	183	0.0455	1	1	21.6	0.0463	1	5	0.0222	0.2	1	2	23	unnamed	unnamed,unnamed,unnamed,unnamed,unnamed	Il6st	Hes1,Il6st
GO Biological Process	GO:0048861	leukemia inhibitory factor signaling pathway	183	0.0455	1	1	21.6	0.0463	1	5	0.0222	0.2	1	2	4	unnamed	unnamed,unnamed,unnamed,unnamed,unnamed	Il6st	Il6st,Lifr
GO Biological Process	GO:0048147	negative regulation of fibroblast proliferation	183	0.0455	1	1	21.6	0.0463	1	5	0.0222	0.2	1	5	17	unnamed	unnamed,unnamed,unnamed,unnamed,unnamed	Dach1	B4galt7,Dab2ip,Dach1,Gstp1,Trim32
GO Biological Process	GO:0090329	regulation of DNA-dependent DNA replication	183	0.0455	1	1	21.6	0.0463	1	5	0.0222	0.2	1	2	11	unnamed	unnamed,unnamed,unnamed,unnamed,unnamed	Tipin	Ino80,Tipin
GO Biological Process	GO:0034661	ncRNA catabolic process	183	0.0455	1	1	21.6	0.0463	1	5	0.0222	0.2	1	2	10	unnamed	unnamed,unnamed,unnamed,unnamed,unnamed	Dis3l	Dis3l,Drosha
GO Biological Process	GO:0070120	ciliary neurotrophic factor-mediated signaling pathway	183	0.0455	1	1	21.6	0.0463	1	5	0.0222	0.2	1	2	6	unnamed	unnamed,unnamed,unnamed,unnamed,unnamed	Il6st	Il6st,Lifr
GO Biological Process	GO:0051187	cofactor catabolic process	183	0.0455	1	1	21.6	0.0463	1	5	0.0222	0.2	1	4	34	unnamed	unnamed,unnamed,unnamed,unnamed,unnamed	Ogdhl	4933405O20Rik,Aspdh,Fh1,Ogdhl
GO Biological Process	GO:0060252	positive regulation of glial cell proliferation	183	0.0455	1	1	21.6	0.0463	1	5	0.0222	0.2	1	4	5	unnamed	unnamed,unnamed,unnamed,unnamed,unnamed	Gfap	Etv5,Gfap,Lyn,Tspo
GO Biological Process	GO:0006354	transcription elongation, DNA-dependent	183	0.0455	1	1	21.6	0.0463	1	5	0.0222	0.2	1	3	13	unnamed	unnamed,unnamed,unnamed,unnamed,unnamed	Ell3	Ell3,Tcea3,Tceb3
GO Biological Process	GO:0001659	temperature homeostasis	183	0.0455	1	1	21.6	0.0463	1	5	0.0222	0.2	1	3	24	unnamed	unnamed,unnamed,unnamed,unnamed,unnamed	Tnfrsf11a	Drd2,Htr2a,Tnfrsf11a
GO Biological Process	GO:0034446	substrate adhesion-dependent cell spreading	183	0.0455	1	1	21.6	0.0463	1	5	0.0222	0.2	1	4	19	unnamed	unnamed,unnamed,unnamed,unnamed,unnamed	Brca1	Brca1,Bves,Efna1,Lamb1
GO Biological Process	GO:0007098	centrosome cycle	183	0.0455	1	1	21.6	0.0463	1	5	0.0222	0.2	1	4	18	unnamed	unnamed,unnamed,unnamed,unnamed,unnamed	Brca1	Brca1,Brsk1,Ctnnb1,Nek2
GO Biological Process	GO:0006020	inositol metabolic process	183	0.0455	1	1	21.6	0.0463	1	5	0.0222	0.2	1	2	11	unnamed	unnamed,unnamed,unnamed,unnamed,unnamed	Ppip5k2	Itpka,Ppip5k2
GO Biological Process	GO:0016075	rRNA catabolic process	183	0.0455	1	1	21.6	0.0463	1	5	0.0222	0.2	1	2	5	unnamed	unnamed,unnamed,unnamed,unnamed,unnamed	Dis3l	Dis3l,Drosha
GO Biological Process	GO:0032435	negative regulation of proteasomal ubiquitin-dependent protein catabolic process	183	0.0455	1	1	21.6	0.0463	1	5	0.0222	0.2	1	3	10	unnamed	unnamed,unnamed,unnamed,unnamed,unnamed	Gipc1	Gipc1,N4bp1,Usp44
GO Biological Process	GO:0010389	regulation of G2/M transition of mitotic cell cycle	183	0.0455	1	1	21.6	0.0463	1	5	0.0222	0.2	1	4	23	unnamed	unnamed,unnamed,unnamed,unnamed,unnamed	Tipin	Brd4,Foxo4,Tipin,Usp47
GO Biological Process	GO:0009109	coenzyme catabolic process	183	0.0455	1	1	21.6	0.0463	1	5	0.0222	0.2	1	4	30	unnamed	unnamed,unnamed,unnamed,unnamed,unnamed	Ogdhl	4933405O20Rik,Aspdh,Fh1,Ogdhl
GO Biological Process	GO:0032355	response to estradiol stimulus	201	0.0455	1	1	5.84	0.343	2	37	0.0444	0.0541	2	21	103	unnamed,unnamed	unnamed,unnamed,unnamed,unnamed,unnamed,unnamed,unnamed,unnamed,unnamed,unnamed,unnamed,unnamed,unnamed,unnamed,unnamed,unnamed,unnamed,unnamed,unnamed,unnamed,unnamed,unnamed,unnamed,unnamed,unnamed,unnamed,unnamed,unnamed,unnamed,unnamed,unnamed,unnamed,unnamed,unnamed,unnamed,unnamed,unnamed	Brca1,Dusp1	Ahr,Arnt2,Bdh1,Brca1,Ccnd2,Ctgf,Ctnnb1,Dusp1,Gstp1,Hmbs,Mmp15,Mtap1b,Ncoa1,Nkx2-5,Nrf1,Ntm,Prdm2,Prkca,Slc25a36,Tgfb2,Ucn
GO Biological Process	GO:0044267	cellular protein metabolic process	202	0.0477	1	1	1.5	10.6	16	1149	0.356	0.0139	10	521	2249	unnamed,unnamed,unnamed,unnamed,unnamed,unnamed,unnamed,unnamed,unnamed,unnamed,unnamed,unnamed,unnamed,unnamed,unnamed,unnamed	unnamed,unnamed,unnamed,unnamed,unnamed,unnamed,unnamed,unnamed,unnamed,unnamed,unnamed,unnamed,unnamed,unnamed,unnamed,unnamed,unnamed,unnamed,unnamed,unnamed,unnamed,unnamed,unnamed,unnamed,unnamed,unnamed,unnamed,unnamed,unnamed,unnamed,unnamed,unnamed,unnamed,unnamed,unnamed,unnamed,unnamed,unnamed,unnamed,unnamed,unnamed,unnamed,unnamed,unnamed,unnamed,unnamed,unnamed,unnamed,unnamed,unnamed…	Brca1,Chfr,Cwh43,Dnajb1,Dusp1,Eif4h,Gak,Hipk4,Limk1,March5	1500015O10Rik,2410022L05Rik,2700078E11Rik,AI314180,Aarsd1,Acr,Acvr1b,Adam8,Adrbk1,Agtpbp1,Ahsa1,Akt2,Akt3,Alpk2,Anapc1,Anapc16,Anapc7,Ankk1,App,Arih1,Arrb1,Asphd1,Asphd2,Atg7,Atm,Atxn3,B230120H23Rik,B3galnt1,B3galt2,B3gnt3,B3gnt7,Baz1b,Bbs10,Bcl2,Bcr,Bmp7,Bmpr1a,Bmpr1b,Bmpr2,Braf,Brca1,Brd1,Brd4,Brsk1,Btrc,Camk2d,Camk4,Camkk2,Cand1,Cbl,Cblb,Cbll1,Ccnd1,Ccnh,Ccnt1,Cct2,Cct4,Cct7,Cdc42bpa,Cdk14,Cdk…
GO Biological Process	GO:0060284	regulation of cell development	203	0.0491	1	1	2.23	2.69	6	290	0.133	0.0207	5	111	431	unnamed,unnamed,unnamed,unnamed,unnamed,unnamed	unnamed,unnamed,unnamed,unnamed,unnamed,unnamed,unnamed,unnamed,unnamed,unnamed,unnamed,unnamed,unnamed,unnamed,unnamed,unnamed,unnamed,unnamed,unnamed,unnamed,unnamed,unnamed,unnamed,unnamed,unnamed,unnamed,unnamed,unnamed,unnamed,unnamed,unnamed,unnamed,unnamed,unnamed,unnamed,unnamed,unnamed,unnamed,unnamed,unnamed,unnamed,unnamed,unnamed,unnamed,unnamed,unnamed,unnamed,unnamed,unnamed,unnamed…	Gfap,Il6st,Limk1,Nefl,Nefm	Adrb1,App,Arf6,Arhgef2,Aspm,Atf1,Atoh1,Axin2,Bcl2,Bhlhe23,Bmp7,Bmpr1a,Ccnd2,Cdh4,Cdk5r1,Cdk5rap2,Cdon,Chn1,Cit,Cntn2,Cntn4,Ctnnb1,D130043K22Rik,Drd2,Efna1,Epb4.1l5,Etv5,Fez1,Fgfr3,Frzb,Gdf11,Gfap,Grin1,Grm5,Hdac4,Hes1,Hes5,Heyl,Hook3,Hoxd11,Hoxd3,Id4,Il6st,Itgb1,Itm2c,Limk1,Lrp6,Lyn,Lzts1,Maml1,Meg3,Mt3,Mtap1b,Nbl1,Ncs1,Nefl,Nefm,Nkx2-5,Nrp1,Ntm,Ntrk2,Ntrk3,Numb,Pax2,Pax6,Pax8,Pcm1,Pdlim5,Plcb1,P…
GO Biological Process	GO:0009895	negative regulation of catabolic process	204	0.05	1	1	5.54	0.361	2	39	0.0444	0.0513	2	13	55	unnamed,unnamed	unnamed,unnamed,unnamed,unnamed,unnamed,unnamed,unnamed,unnamed,unnamed,unnamed,unnamed,unnamed,unnamed,unnamed,unnamed,unnamed,unnamed,unnamed,unnamed,unnamed,unnamed,unnamed,unnamed,unnamed,unnamed,unnamed,unnamed,unnamed,unnamed,unnamed,unnamed,unnamed,unnamed,unnamed,unnamed,unnamed,unnamed,unnamed,unnamed	Gipc1,Mdm4	Ddit4,Fyn,Gipc1,Grin2a,Grin2c,Hdac4,Mdm4,N4bp1,Pabpc1,Ptpn3,Smad4,Timp3,Usp44
GO Biological Process	GO:0044248	cellular catabolic process	205	0.0521	1	1	1.82	4.94	9	533	0.2	0.0169	5	225	1015	unnamed,unnamed,unnamed,unnamed,unnamed,unnamed,unnamed,unnamed,unnamed	unnamed,unnamed,unnamed,unnamed,unnamed,unnamed,unnamed,unnamed,unnamed,unnamed,unnamed,unnamed,unnamed,unnamed,unnamed,unnamed,unnamed,unnamed,unnamed,unnamed,unnamed,unnamed,unnamed,unnamed,unnamed,unnamed,unnamed,unnamed,unnamed,unnamed,unnamed,unnamed,unnamed,unnamed,unnamed,unnamed,unnamed,unnamed,unnamed,unnamed,unnamed,unnamed,unnamed,unnamed,unnamed,unnamed,unnamed,unnamed,unnamed,unnamed…	Chfr,Dis3l,Hspa1b,Ide,Ogdhl	1500015O10Rik,2700078E11Rik,4933405O20Rik,5430411K18Rik,AI314180,Abca8b,Abcb5,Abcb7,Abcc4,Abcg1,Abcg4,Acr,Agap1,Agap3,Aldh5a1,Arf6,Arih1,Arl3,Arrb1,Aspdh,Asrgl1,Atg4b,Atg7,Atl3,Atm,Atp13a3,Atp5d,Atp5j,Bcat1,Bnip3,Btrc,C77370,Cda,Chfr,Cln8,Colq,Cps1,Crmp1,Cul1,Cul3,Cul4b,Cul5,Cul7,Cyld,Cyp26b1,Cyp26c1,Cyp27b1,Dcp1b,Dcp2,Ddx25,Decr1,Dera,Dio2,Dis3l,Dnajb9,Dnajc3,Dnm1l,Dnm3,Dpysl3,Dram1,Drosha,Dync2…
GO Biological Process	GO:0046488	phosphatidylinositol metabolic process	206	0.0524	1	1	5.4	0.37	2	40	0.0444	0.05	2	22	84	unnamed,unnamed	unnamed,unnamed,unnamed,unnamed,unnamed,unnamed,unnamed,unnamed,unnamed,unnamed,unnamed,unnamed,unnamed,unnamed,unnamed,unnamed,unnamed,unnamed,unnamed,unnamed,unnamed,unnamed,unnamed,unnamed,unnamed,unnamed,unnamed,unnamed,unnamed,unnamed,unnamed,unnamed,unnamed,unnamed,unnamed,unnamed,unnamed,unnamed,unnamed,unnamed	Cwh43,Pik3c2b	Cwh43,Dpm1,Drd2,Galr2,Htr2a,Ip6k2,Mtm1,Pgap2,Pigg,Pigm,Pign,Pigo,Pigs,Pik3c2b,Pik3c3,Pik3ca,Pik3cd,Pip4k2a,Plcb1,Plch2,Slc27a1,Synj2
GO Biological Process	GO:0002573	myeloid leukocyte differentiation	206	0.0524	1	1	5.4	0.37	2	40	0.0444	0.05	2	13	60	unnamed,unnamed	unnamed,unnamed,unnamed,unnamed,unnamed,unnamed,unnamed,unnamed,unnamed,unnamed,unnamed,unnamed,unnamed,unnamed,unnamed,unnamed,unnamed,unnamed,unnamed,unnamed,unnamed,unnamed,unnamed,unnamed,unnamed,unnamed,unnamed,unnamed,unnamed,unnamed,unnamed,unnamed,unnamed,unnamed,unnamed,unnamed,unnamed,unnamed,unnamed,unnamed	Il31ra,Tnfrsf11a	Camk4,Ctnnb1,Gab2,Il31ra,Ireb2,Junb,Plcb1,Psen1,Tgfbr2,Thoc5,Tm7sf4,Tnfrsf11a,Tnfsf11
GO Biological Process	GO:0016032	viral reproduction	206	0.0524	1	1	5.4	0.37	2	40	0.0444	0.05	2	13	91	unnamed,unnamed	unnamed,unnamed,unnamed,unnamed,unnamed,unnamed,unnamed,unnamed,unnamed,unnamed,unnamed,unnamed,unnamed,unnamed,unnamed,unnamed,unnamed,unnamed,unnamed,unnamed,unnamed,unnamed,unnamed,unnamed,unnamed,unnamed,unnamed,unnamed,unnamed,unnamed,unnamed,unnamed,unnamed,unnamed,unnamed,unnamed,unnamed,unnamed,unnamed,unnamed	Scand1,Thoc3	Bcl2l11,Bicd1,Ntrk3,Rraga,Scand1,Thoc3,Thoc5,Vapb,Zfp369,Zfp498,Zkscan16,Zkscan2,Zscan20
GO Biological Process	GO:0070727	cellular macromolecule localization	209	0.0533	1	1	2.19	2.74	6	296	0.133	0.0203	3	130	497	unnamed,unnamed,unnamed,unnamed,unnamed,unnamed	unnamed,unnamed,unnamed,unnamed,unnamed,unnamed,unnamed,unnamed,unnamed,unnamed,unnamed,unnamed,unnamed,unnamed,unnamed,unnamed,unnamed,unnamed,unnamed,unnamed,unnamed,unnamed,unnamed,unnamed,unnamed,unnamed,unnamed,unnamed,unnamed,unnamed,unnamed,unnamed,unnamed,unnamed,unnamed,unnamed,unnamed,unnamed,unnamed,unnamed,unnamed,unnamed,unnamed,unnamed,unnamed,unnamed,unnamed,unnamed,unnamed,unnamed…	Gipc1,March5,Mzt1	Ank2,Ankrd13c,Ap1g1,Ap1m1,Ap1s1,Ap1s2,Ap1s3,Ap2m1,Ap3m1,Ap4s1,Apba1,Arap1,Arcn1,Arf6,Arl2bp,Axin2,Bbs4,Bicd1,Bmp7,Cacnb1,Cep57,Clk2,Clta,Cltc,Cntn2,Cog3,Cse1l,Ctnnb1,Dlg4,Egr2,Erbb2ip,Exoc4,Fbln5,Fgf9,Get4,Gga3,Gipc1,Grik2,Grin2b,Grin3b,Hes1,Hook3,Hsp90aa1,Hspa4,Htt,Id4,Immp2l,Ipo4,Ipo5,Ipo9,Itgb1,Kdelr2,Kpna3,Kpna4,Kpnb1,Mapksp1,March5,Mesdc2,Mpp5,Mrap2,Mtap7,Mtx2,Mtx3,Mzt1,Nfasc,Nfkbia,Nup54,Op…
GO Biological Process	GO:0034613	cellular protein localization	209	0.0533	1	1	2.19	2.74	6	296	0.133	0.0203	3	129	494	unnamed,unnamed,unnamed,unnamed,unnamed,unnamed	unnamed,unnamed,unnamed,unnamed,unnamed,unnamed,unnamed,unnamed,unnamed,unnamed,unnamed,unnamed,unnamed,unnamed,unnamed,unnamed,unnamed,unnamed,unnamed,unnamed,unnamed,unnamed,unnamed,unnamed,unnamed,unnamed,unnamed,unnamed,unnamed,unnamed,unnamed,unnamed,unnamed,unnamed,unnamed,unnamed,unnamed,unnamed,unnamed,unnamed,unnamed,unnamed,unnamed,unnamed,unnamed,unnamed,unnamed,unnamed,unnamed,unnamed…	Gipc1,March5,Mzt1	Ank2,Ankrd13c,Ap1g1,Ap1m1,Ap1s1,Ap1s2,Ap1s3,Ap2m1,Ap3m1,Ap4s1,Apba1,Arap1,Arcn1,Arf6,Arl2bp,Axin2,Bbs4,Bicd1,Bmp7,Cacnb1,Cep57,Clk2,Clta,Cltc,Cntn2,Cog3,Cse1l,Ctnnb1,Dlg4,Egr2,Erbb2ip,Exoc4,Fbln5,Fgf9,Get4,Gga3,Gipc1,Grik2,Grin2b,Grin3b,Hes1,Hook3,Hsp90aa1,Hspa4,Htt,Id4,Immp2l,Ipo4,Ipo5,Ipo9,Itgb1,Kdelr2,Kpna3,Kpna4,Kpnb1,Mapksp1,March5,Mesdc2,Mpp5,Mrap2,Mtap7,Mtx2,Mtx3,Mzt1,Nfasc,Nfkbia,Nup54,Op…
GO Biological Process	GO:2001022	positive regulation of response to DNA damage stimulus	211	0.0543	1	1	18	0.0556	1	6	0.0222	0.167	1	5	32	unnamed	unnamed,unnamed,unnamed,unnamed,unnamed,unnamed	Brca1	Atm,Brca1,Gm5136,Rnf168,Ube2n
GO Biological Process	GO:0042511	positive regulation of tyrosine phosphorylation of Stat1 protein	211	0.0543	1	1	18	0.0556	1	6	0.0222	0.167	1	2	5	unnamed	unnamed,unnamed,unnamed,unnamed,unnamed,unnamed	Il6st	Fgfr3,Il6st
GO Biological Process	GO:0043491	protein kinase B signaling cascade	211	0.0543	1	1	18	0.0556	1	6	0.0222	0.167	1	4	15	unnamed	unnamed,unnamed,unnamed,unnamed,unnamed,unnamed	Pik3c2b	Akt2,Pax2,Pik3c2b,Pik3ca
GO Biological Process	GO:0014012	peripheral nervous system axon regeneration	211	0.0543	1	1	18	0.0556	1	6	0.0222	0.167	1	3	5	unnamed	unnamed,unnamed,unnamed,unnamed,unnamed,unnamed	Nefl	Mtap1b,Nefl,Tspo
GO Biological Process	GO:0009060	aerobic respiration	211	0.0543	1	1	18	0.0556	1	6	0.0222	0.167	1	5	36	unnamed	unnamed,unnamed,unnamed,unnamed,unnamed,unnamed	Ogdhl	4933405O20Rik,Cox10,Fh1,Ogdhl,Oxa1l
GO Biological Process	GO:0046879	hormone secretion	216	0.0547	1	1	5.27	0.38	2	41	0.0444	0.0488	1	16	59	unnamed,unnamed	unnamed,unnamed,unnamed,unnamed,unnamed,unnamed,unnamed,unnamed,unnamed,unnamed,unnamed,unnamed,unnamed,unnamed,unnamed,unnamed,unnamed,unnamed,unnamed,unnamed,unnamed,unnamed,unnamed,unnamed,unnamed,unnamed,unnamed,unnamed,unnamed,unnamed,unnamed,unnamed,unnamed,unnamed,unnamed,unnamed,unnamed,unnamed,unnamed,unnamed,unnamed	Cplx1	Cplx1,Dio2,Htt,Lep,Lyn,Mafa,Meg3,Pclo,Rapgef4,Rims2,Slc18a2,Smad2,Smpd3,Snap25,Vgf,Ywhaz
GO Biological Process	GO:0007584	response to nutrient	217	0.0555	1	1	3.45	0.87	3	94	0.0667	0.0319	3	39	221	unnamed,unnamed,unnamed	unnamed,unnamed,unnamed,unnamed,unnamed,unnamed,unnamed,unnamed,unnamed,unnamed,unnamed,unnamed,unnamed,unnamed,unnamed,unnamed,unnamed,unnamed,unnamed,unnamed,unnamed,unnamed,unnamed,unnamed,unnamed,unnamed,unnamed,unnamed,unnamed,unnamed,unnamed,unnamed,unnamed,unnamed,unnamed,unnamed,unnamed,unnamed,unnamed,unnamed,unnamed,unnamed,unnamed,unnamed,unnamed,unnamed,unnamed,unnamed,unnamed,unnamed…	Brca1,Dusp1,Il6st	Adnp2,Bcl2,Bdh1,Brca1,Ccnd1,Clk2,Cyp26b1,Cyp27b1,Dusp1,Fzd1,Gstp1,Hmbs,Hmgcr,Il6st,Irf1,Itgb1,Klf4,Lep,Lrp6,Ltc4s,Lyn,Mll5,Mtap1b,Mtap7,Ncoa1,Nrf1,Ntrk3,Osr1,Pax2,Ptk6,Rps6kb1,Serpinc1,Spp1,Stc2,Tgfb2,Timp3,Tspo,Vcam1,Vldlr
GO Biological Process	GO:0031324	negative regulation of cellular metabolic process	218	0.0564	1	1	1.89	4.24	8	458	0.178	0.0175	6	193	952	unnamed,unnamed,unnamed,unnamed,unnamed,unnamed,unnamed,unnamed	unnamed,unnamed,unnamed,unnamed,unnamed,unnamed,unnamed,unnamed,unnamed,unnamed,unnamed,unnamed,unnamed,unnamed,unnamed,unnamed,unnamed,unnamed,unnamed,unnamed,unnamed,unnamed,unnamed,unnamed,unnamed,unnamed,unnamed,unnamed,unnamed,unnamed,unnamed,unnamed,unnamed,unnamed,unnamed,unnamed,unnamed,unnamed,unnamed,unnamed,unnamed,unnamed,unnamed,unnamed,unnamed,unnamed,unnamed,unnamed,unnamed,unnamed…	Brca1,Dach1,Gipc1,Limk1,Mdm4,Tipin	AK028549,Aes,Ahr,Akt2,Apom,Arrb1,Atf3,Atxn1,Bag5,Bahd1,Basp1,Bhlhe41,Bmp7,Brca1,Btrc,Calca,Cd276,Cda,Cdk5r1,Cdkn1b,Clk2,Ctbp2,Ctnnb1,Dach1,Ddit4,Dkk3,Dnmt3a,E2f1,Eapp,Efna1,Eid2,Eif2c1,Eif2c2,Eif2c3,Eif4ebp2,Elf3,Esx1,Fam129a,Fbxw11,Ferd3l,Fgfr3,Fkbp1a,Foxd1,Foxe3,Foxf1a,Foxo4,Foxp4,Foxs1,Fzd1,Fzd8,Gabpa,Gatad2a,Gclc,Gfpt1,Ghrl,Gipc1,Glis1,Gtpbp4,Hand1,Hcrt,Hdac3,Hdac4,Hes1,Hes5,Heyl,Hipk2,Hipk3,…
GO Biological Process	GO:0009914	hormone transport	219	0.0571	1	1	5.14	0.389	2	42	0.0444	0.0476	1	17	65	unnamed,unnamed	unnamed,unnamed,unnamed,unnamed,unnamed,unnamed,unnamed,unnamed,unnamed,unnamed,unnamed,unnamed,unnamed,unnamed,unnamed,unnamed,unnamed,unnamed,unnamed,unnamed,unnamed,unnamed,unnamed,unnamed,unnamed,unnamed,unnamed,unnamed,unnamed,unnamed,unnamed,unnamed,unnamed,unnamed,unnamed,unnamed,unnamed,unnamed,unnamed,unnamed,unnamed,unnamed	Cplx1	Cplx1,Dio2,Htt,Lep,Ly6e,Lyn,Mafa,Meg3,Pclo,Rapgef4,Rims2,Slc18a2,Smad2,Smpd3,Snap25,Vgf,Ywhaz
GO Biological Process	GO:0007346	regulation of mitotic cell cycle	220	0.0584	1	1	3.38	0.889	3	96	0.0667	0.0313	2	43	190	unnamed,unnamed,unnamed	unnamed,unnamed,unnamed,unnamed,unnamed,unnamed,unnamed,unnamed,unnamed,unnamed,unnamed,unnamed,unnamed,unnamed,unnamed,unnamed,unnamed,unnamed,unnamed,unnamed,unnamed,unnamed,unnamed,unnamed,unnamed,unnamed,unnamed,unnamed,unnamed,unnamed,unnamed,unnamed,unnamed,unnamed,unnamed,unnamed,unnamed,unnamed,unnamed,unnamed,unnamed,unnamed,unnamed,unnamed,unnamed,unnamed,unnamed,unnamed,unnamed,unnamed…	Chfr,Tipin	Afap1l2,Apbb2,Apc,App,Asns,Atm,Bcl2,Bmp7,Brd4,C77370,Ccnd1,Cdc6,Chek1,Chfr,Cul4b,Cyld,Dlg1,Dusp3,E2f1,Fbxo31,Fgfr3,Foxo4,Hdac3,Ino80,Kras,Myo16,Nusap1,Pcid2,Pebp1,Ptpn3,Pura,Rps6kb1,Sphk1,Terf1,Tgfa,Thap1,Tipin,Ube2c,Usp22,Usp44,Usp47,Ywhah,Zc3h12d
GO Biological Process	GO:0031399	regulation of protein modification process	221	0.0593	1	1	1.98	3.54	7	382	0.156	0.0183	6	169	695	unnamed,unnamed,unnamed,unnamed,unnamed,unnamed,unnamed	unnamed,unnamed,unnamed,unnamed,unnamed,unnamed,unnamed,unnamed,unnamed,unnamed,unnamed,unnamed,unnamed,unnamed,unnamed,unnamed,unnamed,unnamed,unnamed,unnamed,unnamed,unnamed,unnamed,unnamed,unnamed,unnamed,unnamed,unnamed,unnamed,unnamed,unnamed,unnamed,unnamed,unnamed,unnamed,unnamed,unnamed,unnamed,unnamed,unnamed,unnamed,unnamed,unnamed,unnamed,unnamed,unnamed,unnamed,unnamed,unnamed,unnamed…	Brca1,Dusp1,Il31ra,Il6st,Limk1,Tnfrsf11a	Acvr1b,Adam17,Adam8,Afap1l2,Agap2,Agk,Akt2,Apc,Apoa1,App,Arl2bp,Arrb1,Atg7,Axin2,B230120H23Rik,Bag5,Bcl10,Bmp7,Bmpr1a,Bmpr2,Braf,Brca1,Cab39,Calca,Ccnd1,Ccnd2,Ccnh,Ccnk,Ccno,Ccnt1,Ccnt2,Ccny,Cd44,Cd80,Cdk5r1,Cdkn1b,Cdon,Chek1,Chordc1,Ctgf,Cyr61,Dab2ip,Dgkb,Dgke,Dgkg,Dgki,Dlg1,Drd2,Dusp1,Dusp19,Dusp3,Dusp4,Dusp8,Dusp9,Eef2k,Efna1,Efna5,Eif4g3,Ern1,Fam129a,Fbxo2,Fgfr3,Fkbp1a,Fktn,Frs2,Fzd1,Fzd8,Gcl…
GO Biological Process	GO:0010605	negative regulation of macromolecule metabolic process	222	0.0625	1	1	1.85	4.33	8	468	0.178	0.0171	6	201	974	unnamed,unnamed,unnamed,unnamed,unnamed,unnamed,unnamed,unnamed	unnamed,unnamed,unnamed,unnamed,unnamed,unnamed,unnamed,unnamed,unnamed,unnamed,unnamed,unnamed,unnamed,unnamed,unnamed,unnamed,unnamed,unnamed,unnamed,unnamed,unnamed,unnamed,unnamed,unnamed,unnamed,unnamed,unnamed,unnamed,unnamed,unnamed,unnamed,unnamed,unnamed,unnamed,unnamed,unnamed,unnamed,unnamed,unnamed,unnamed,unnamed,unnamed,unnamed,unnamed,unnamed,unnamed,unnamed,unnamed,unnamed,unnamed…	Brca1,Dach1,Gipc1,Limk1,Mdm4,Tipin	4921515J06Rik,AK028549,Adar,Aes,Ahr,Akt2,Apom,Ar,Arrb1,Atf3,Atxn1,Bag5,Bahd1,Basp1,Bhlhe41,Bmp7,Bnip3,Brca1,Btrc,Calca,Cd276,Cd46,Cdk5r1,Cdkn1b,Ctbp2,Ctnnb1,Dach1,Ddit4,Dkk3,Dnmt3a,Drosha,E2f1,Eapp,Efna1,Eid2,Eif2c1,Eif2c2,Eif2c3,Eif4ebp2,Elf3,Esx1,Fam129a,Fbxw11,Ferd3l,Fgfr3,Fkbp1a,Foxd1,Foxe3,Foxf1a,Foxo4,Foxp4,Foxs1,Fyn,Fzd1,Fzd8,Gabpa,Gatad2a,Gclc,Gfpt1,Ghrl,Gipc1,Glis1,Grin2a,Grin2c,Gstp1,Gt…
GO Biological Process	GO:0060052	neurofilament cytoskeleton organization	223	0.0631	1	1	15.4	0.0648	1	7	0.0222	0.143	2	5	8	unnamed	unnamed,unnamed,unnamed,unnamed,unnamed,unnamed,unnamed	Nefl,Nefm	Cln8,Ina,Nefl,Nefm,Sod1
GO Biological Process	GO:0042510	regulation of tyrosine phosphorylation of Stat1 protein	223	0.0631	1	1	15.4	0.0648	1	7	0.0222	0.143	1	3	8	unnamed	unnamed,unnamed,unnamed,unnamed,unnamed,unnamed,unnamed	Il6st	Fgfr3,Il6st,Irf1
GO Biological Process	GO:0071848	positive regulation of ERK1 and ERK2 cascade via TNFSF11-mediated signaling	223	0.0631	1	1	15.4	0.0648	1	7	0.0222	0.143	1	2	2	unnamed	unnamed,unnamed,unnamed,unnamed,unnamed,unnamed,unnamed	Tnfrsf11a	Tnfrsf11a,Tnfsf11
GO Biological Process	GO:2000193	positive regulation of fatty acid transport	223	0.0631	1	1	15.4	0.0648	1	7	0.0222	0.143	1	2	9	unnamed	unnamed,unnamed,unnamed,unnamed,unnamed,unnamed,unnamed	Tnfrsf11a	Tnfrsf11a,Tnfsf11
GO Biological Process	GO:0032308	positive regulation of prostaglandin secretion	223	0.0631	1	1	15.4	0.0648	1	7	0.0222	0.143	1	2	8	unnamed	unnamed,unnamed,unnamed,unnamed,unnamed,unnamed,unnamed	Tnfrsf11a	Tnfrsf11a,Tnfsf11
GO Biological Process	GO:0071812	positive regulation of fever generation by positive regulation of prostaglandin secretion	223	0.0631	1	1	15.4	0.0648	1	7	0.0222	0.143	1	2	2	unnamed	unnamed,unnamed,unnamed,unnamed,unnamed,unnamed,unnamed	Tnfrsf11a	Tnfrsf11a,Tnfsf11
GO Biological Process	GO:0006349	regulation of gene expression by genetic imprinting	223	0.0631	1	1	15.4	0.0648	1	7	0.0222	0.143	1	3	13	unnamed	unnamed,unnamed,unnamed,unnamed,unnamed,unnamed,unnamed	Brca1	Brca1,Dnmt3a,Prmt7
GO Biological Process	GO:0006120	mitochondrial electron transport, NADH to ubiquinone	223	0.0631	1	1	15.4	0.0648	1	7	0.0222	0.143	1	2	5	unnamed	unnamed,unnamed,unnamed,unnamed,unnamed,unnamed,unnamed	mt-Nd4	Dld,mt-Nd4
GO Biological Process	GO:0031622	positive regulation of fever generation	223	0.0631	1	1	15.4	0.0648	1	7	0.0222	0.143	1	2	10	unnamed	unnamed,unnamed,unnamed,unnamed,unnamed,unnamed,unnamed	Tnfrsf11a	Tnfrsf11a,Tnfsf11
GO Biological Process	GO:0007214	gamma-aminobutyric acid signaling pathway	223	0.0631	1	1	15.4	0.0648	1	7	0.0222	0.143	2	6	15	unnamed	unnamed,unnamed,unnamed,unnamed,unnamed,unnamed,unnamed	Gabra2,Gabrg1	Gabbr2,Gabra1,Gabra2,Gabra3,Gabrg1,Gabrg2
GO Biological Process	GO:0014047	glutamate secretion	223	0.0631	1	1	15.4	0.0648	1	7	0.0222	0.143	1	3	7	unnamed	unnamed,unnamed,unnamed,unnamed,unnamed,unnamed,unnamed	Gipc1	Apba1,Gipc1,Ntrk2
GO Biological Process	GO:0031620	regulation of fever generation	223	0.0631	1	1	15.4	0.0648	1	7	0.0222	0.143	1	2	11	unnamed	unnamed,unnamed,unnamed,unnamed,unnamed,unnamed,unnamed	Tnfrsf11a	Tnfrsf11a,Tnfsf11
GO Biological Process	GO:0010941	regulation of cell death	235	0.0638	1	1	1.84	4.35	8	470	0.178	0.017	8	213	935	unnamed,unnamed,unnamed,unnamed,unnamed,unnamed,unnamed,unnamed	unnamed,unnamed,unnamed,unnamed,unnamed,unnamed,unnamed,unnamed,unnamed,unnamed,unnamed,unnamed,unnamed,unnamed,unnamed,unnamed,unnamed,unnamed,unnamed,unnamed,unnamed,unnamed,unnamed,unnamed,unnamed,unnamed,unnamed,unnamed,unnamed,unnamed,unnamed,unnamed,unnamed,unnamed,unnamed,unnamed,unnamed,unnamed,unnamed,unnamed,unnamed,unnamed,unnamed,unnamed,unnamed,unnamed,unnamed,unnamed,unnamed,unnamed…	Brca1,Dusp1,Hspa1b,Mdm4,Nefl,Pdia3,S100b,Sncb	2810002N01Rik,AK028549,Adam17,Adam8,Adar,Adnp2,Agap2,Ahr,Aifm3,Akt2,Ank2,Ankrd13c,Apbb2,Apc,App,Ar,Arhgap10,Arnt2,Asns,Atg7,Atm,Aven,Axin2,B230120H23Rik,Bag1,Bag3,Bag4,Barhl1,Bcl10,Bcl2,Bcl2l10,Bcl2l11,Bcl2l14,Bhlhe23,Bmp7,Bnip1,Bnip3,Braf,Brca1,C6,Cbl,Cd44,Cdk5r1,Cdkn1b,Chst11,Cln8,Crh,Csrnp3,Ctgf,Ctnnb1,Cul7,Cx3cl1,Cyr61,Dab2ip,Dedd2,Diablo,Dusp1,Dyrk2,Eef1a2,Efhc1,Ercc3,Ern1,Fasl,Fgfr3,Fn1,Fnt…
GO Biological Process	GO:0022604	regulation of cell morphogenesis	236	0.065	1	1	2.62	1.53	4	165	0.0889	0.0242	3	62	235	unnamed,unnamed,unnamed,unnamed	unnamed,unnamed,unnamed,unnamed,unnamed,unnamed,unnamed,unnamed,unnamed,unnamed,unnamed,unnamed,unnamed,unnamed,unnamed,unnamed,unnamed,unnamed,unnamed,unnamed,unnamed,unnamed,unnamed,unnamed,unnamed,unnamed,unnamed,unnamed,unnamed,unnamed,unnamed,unnamed,unnamed,unnamed,unnamed,unnamed,unnamed,unnamed,unnamed,unnamed,unnamed,unnamed,unnamed,unnamed,unnamed,unnamed,unnamed,unnamed,unnamed,unnamed…	Limk1,Nefl,Nefm	Arap1,Arap3,Axin2,Bves,Camsap1,Cdc42ep4,Cdc42se1,Cdh4,Cdk5r1,Cfl1,Chn1,Cit,Cntn2,Ctnnb1,Cyfip1,Efna1,Epb4.1l5,Fitm2,Fmnl2,Fn1,Fyn,Gna12,Grin1,Grlf1,Limk1,Lzts1,Mtap1b,Myl12b,Nefl,Nefm,Nrp1,Ntrk3,Numb,Pax2,Pax8,Pdlim5,Plxna4,Ppp2ca,Prpf40a,Psen1,Robo1,Sema3a,Sema4d,Sipa1l1,Slit1,Slit2,Smad2,Smad4,Spp1,Ssh1,Ssh2,Stk11,Tnik,Tnr,Ttl,Ulk2,Vegfa,Vil1,Wasf3,Ywhah,Zfp703,Zranb1
GO Biological Process	GO:0010948	negative regulation of cell cycle process	237	0.0697	1	1	4.6	0.435	2	47	0.0444	0.0426	2	17	56	unnamed,unnamed	unnamed,unnamed,unnamed,unnamed,unnamed,unnamed,unnamed,unnamed,unnamed,unnamed,unnamed,unnamed,unnamed,unnamed,unnamed,unnamed,unnamed,unnamed,unnamed,unnamed,unnamed,unnamed,unnamed,unnamed,unnamed,unnamed,unnamed,unnamed,unnamed,unnamed,unnamed,unnamed,unnamed,unnamed,unnamed,unnamed,unnamed,unnamed,unnamed,unnamed,unnamed,unnamed,unnamed,unnamed,unnamed,unnamed,unnamed	Mdm4,Tipin	Apbb2,Apc,Atm,Bmp7,Cdk5rap2,Chek1,Fgfr3,Mdm4,Msh2,Myo16,Nanos2,Terf1,Tipin,Usp44,Usp47,Wapal,Zc3h12d
GO Biological Process	GO:0040008	regulation of growth	238	0.07	1	1	2.24	2.23	5	241	0.111	0.0207	3	101	439	unnamed,unnamed,unnamed,unnamed,unnamed	unnamed,unnamed,unnamed,unnamed,unnamed,unnamed,unnamed,unnamed,unnamed,unnamed,unnamed,unnamed,unnamed,unnamed,unnamed,unnamed,unnamed,unnamed,unnamed,unnamed,unnamed,unnamed,unnamed,unnamed,unnamed,unnamed,unnamed,unnamed,unnamed,unnamed,unnamed,unnamed,unnamed,unnamed,unnamed,unnamed,unnamed,unnamed,unnamed,unnamed,unnamed,unnamed,unnamed,unnamed,unnamed,unnamed,unnamed,unnamed,unnamed,unnamed…	Cspg5,Hspa1b,Limk1	Adam17,Adnp2,Adrb1,Aes,Afg3l2,Ahr,Ankrd26,Apbb2,App,Ar,Atrn,Bcl2,Bcl2l11,Bmpr2,Cda,Cdh4,Cdkn1b,Crim1,Cspg5,Ctgf,Cyp27b1,Cyr61,Dab2ip,Dcbld2,Dlg1,Drd2,Enox2,Extl3,Fgf9,Fgfr3,Foxs1,Frzb,Gamt,Gap43,Gng4,Hdac3,Hsd3b7,Hspa1b,Htra1,Ino80,Ip6k2,Kat5,Lep,Limk1,Mpo,Mt1,Mtap1b,Ndn,Ndnl2,Ndufa13,Nedd9,Nell2,Nkx2-5,Nppa,Nppc,Nrp1,Ntrk3,Ogfr,Pak2,Pcsk1n,Pik3ca,Plcb1,Plxna4,Rps6kb1,Sash3,Sbf1,Sema3a,Sfn,Siah1a…
GO Biological Process	GO:0048535	lymph node development	239	0.0718	1	1	13.5	0.0741	1	8	0.0222	0.125	1	3	19	unnamed	unnamed,unnamed,unnamed,unnamed,unnamed,unnamed,unnamed,unnamed	Tnfrsf11a	Cxcl13,Tnfrsf11a,Tnfsf11
GO Biological Process	GO:0060291	long-term synaptic potentiation	239	0.0718	1	1	13.5	0.0741	1	8	0.0222	0.125	1	2	12	unnamed	unnamed,unnamed,unnamed,unnamed,unnamed,unnamed,unnamed,unnamed	Gfap	Gfap,Tnr
GO Biological Process	GO:0046854	phosphatidylinositol phosphorylation	239	0.0718	1	1	13.5	0.0741	1	8	0.0222	0.125	1	6	23	unnamed	unnamed,unnamed,unnamed,unnamed,unnamed,unnamed,unnamed,unnamed	Pik3c2b	Ip6k2,Pik3c2b,Pik3c3,Pik3ca,Pik3cd,Pip4k2a
GO Biological Process	GO:0016339	calcium-dependent cell-cell adhesion	239	0.0718	1	1	13.5	0.0741	1	8	0.0222	0.125	1	2	11	unnamed	unnamed,unnamed,unnamed,unnamed,unnamed,unnamed,unnamed,unnamed	Arvcf	Arvcf,Pcdh1
GO Biological Process	GO:0001894	tissue homeostasis	243	0.0723	1	1	4.5	0.444	2	48	0.0444	0.0417	1	21	73	unnamed,unnamed	unnamed,unnamed,unnamed,unnamed,unnamed,unnamed,unnamed,unnamed,unnamed,unnamed,unnamed,unnamed,unnamed,unnamed,unnamed,unnamed,unnamed,unnamed,unnamed,unnamed,unnamed,unnamed,unnamed,unnamed,unnamed,unnamed,unnamed,unnamed,unnamed,unnamed,unnamed,unnamed,unnamed,unnamed,unnamed,unnamed,unnamed,unnamed,unnamed,unnamed,unnamed,unnamed,unnamed,unnamed,unnamed,unnamed,unnamed,unnamed	Cd7	Ankrd11,Bbs1,Bbs10,Bbs4,Bcl2,Cbl,Cd7,Ctnnb1,Epas1,Fh1,Itgb1,Klhl10,Ldb1,Ncdn,Pthlh,Sash3,Sod1,Stk11,Tnfsf11,Vegfa,Whrn
GO Biological Process	GO:0050804	regulation of synaptic transmission	244	0.0746	1	1	2.5	1.6	4	173	0.0889	0.0231	4	60	176	unnamed,unnamed,unnamed,unnamed	unnamed,unnamed,unnamed,unnamed,unnamed,unnamed,unnamed,unnamed,unnamed,unnamed,unnamed,unnamed,unnamed,unnamed,unnamed,unnamed,unnamed,unnamed,unnamed,unnamed,unnamed,unnamed,unnamed,unnamed,unnamed,unnamed,unnamed,unnamed,unnamed,unnamed,unnamed,unnamed,unnamed,unnamed,unnamed,unnamed,unnamed,unnamed,unnamed,unnamed,unnamed,unnamed,unnamed,unnamed,unnamed,unnamed,unnamed,unnamed,unnamed,unnamed…	Cspg5,Gfap,Gipc1,S100b	Abhd6,Bcan,Calb1,Chrna7,Cntn2,Cpeb1,Cplx2,Cspg5,Dlg4,Drd2,Egr2,Gabbr1,Gfap,Gipc1,Grik2,Grin1,Grin2a,Grin2b,Grin2c,Grm1,Grm3,Grm5,Hcrt,Htr1b,Htr2a,Htt,Kcnc4,Kras,Mapk8ip2,Mtap1b,Nat8l,Ncdn,Ncs1,Neto1,Nlgn3,Nos1,Ntrk2,Ophn1,Pebp1,Pfn2,Pink1,Ppfia3,Ppp3ca,Prkce,Psen1,Pxk,Rab11a,Rapgef4,Rims1,S100b,Shank3,Slc18a1,Tac1,Tnr,Ucn,Unc13a,Usp46,Uts2,Vgf,Ywhag
GO Biological Process	GO:0055114	oxidation-reduction process	245	0.076	1	1	2	3	6	324	0.133	0.0185	6	161	823	unnamed,unnamed,unnamed,unnamed,unnamed,unnamed	unnamed,unnamed,unnamed,unnamed,unnamed,unnamed,unnamed,unnamed,unnamed,unnamed,unnamed,unnamed,unnamed,unnamed,unnamed,unnamed,unnamed,unnamed,unnamed,unnamed,unnamed,unnamed,unnamed,unnamed,unnamed,unnamed,unnamed,unnamed,unnamed,unnamed,unnamed,unnamed,unnamed,unnamed,unnamed,unnamed,unnamed,unnamed,unnamed,unnamed,unnamed,unnamed,unnamed,unnamed,unnamed,unnamed,unnamed,unnamed,unnamed,unnamed…	Gapdh,Il6st,Ogdhl,S100b,Txnrd2,mt-Nd4	2810405K02Rik,4933405O20Rik,Acad9,Adi1,Adipor1,Ado,Adrb1,Agps,Aifm3,Akr1b10,Akr1b7,Akt2,Aldh4a1,Aldh5a1,Aldh7a1,Aldh9a1,Alkbh2,Alkbh3,Alkbh5,Alkbh8,Aspdh,Asphd1,Asphd2,Bdh1,Cbr4,Cox10,Cox15,Cp,Cps1,Ctbp2,Cyp20a1,Cyp26b1,Cyp26c1,Cyp27b1,Cyp2d22,Cyp2d26,Cyp2j11-ps,Cyp2j6,Cyp2r1,Cyp2u1,Cyp3a57,Cyp46a1,Cyp4x1,Cyp7a1,Cyp7b1,Decr1,Dhrs3,Dio2,Dld,Egln1,Enox1,Enox2,Epm2a,Ero1l,Fa2h,Fads2,Fads3,Fads6,Far1…
GO Biological Process	GO:0009892	negative regulation of metabolic process	246	0.0762	1	1	1.77	4.52	8	488	0.178	0.0164	6	209	1037	unnamed,unnamed,unnamed,unnamed,unnamed,unnamed,unnamed,unnamed	unnamed,unnamed,unnamed,unnamed,unnamed,unnamed,unnamed,unnamed,unnamed,unnamed,unnamed,unnamed,unnamed,unnamed,unnamed,unnamed,unnamed,unnamed,unnamed,unnamed,unnamed,unnamed,unnamed,unnamed,unnamed,unnamed,unnamed,unnamed,unnamed,unnamed,unnamed,unnamed,unnamed,unnamed,unnamed,unnamed,unnamed,unnamed,unnamed,unnamed,unnamed,unnamed,unnamed,unnamed,unnamed,unnamed,unnamed,unnamed,unnamed,unnamed…	Brca1,Dach1,Gipc1,Limk1,Mdm4,Tipin	4921515J06Rik,AK028549,Adar,Aes,Ahr,Akt2,Apom,Ar,Arrb1,Atf3,Atxn1,Bag5,Bahd1,Basp1,Bhlhe41,Bmp7,Bnip3,Brca1,Btrc,Calca,Cd276,Cd46,Cda,Cdk5r1,Cdkn1b,Clk2,Ctbp2,Ctnnb1,Dach1,Ddit4,Dkk3,Dnmt3a,Drosha,E2f1,Eapp,Efna1,Eid2,Eif2c1,Eif2c2,Eif2c3,Eif4ebp2,Elf3,Esx1,Fam129a,Fbxw11,Ferd3l,Fgfr3,Fkbp1a,Foxd1,Foxe3,Foxf1a,Foxo4,Foxp4,Foxs1,Fyn,Fzd1,Fzd8,Gabpa,Gatad2a,Gclc,Gfpt1,Ghrl,Gipc1,Glis1,Grin2a,Grin2c…
GO Biological Process	GO:0032268	regulation of cellular protein metabolic process	247	0.0769	1	1	1.77	4.53	8	489	0.178	0.0164	7	214	887	unnamed,unnamed,unnamed,unnamed,unnamed,unnamed,unnamed,unnamed	unnamed,unnamed,unnamed,unnamed,unnamed,unnamed,unnamed,unnamed,unnamed,unnamed,unnamed,unnamed,unnamed,unnamed,unnamed,unnamed,unnamed,unnamed,unnamed,unnamed,unnamed,unnamed,unnamed,unnamed,unnamed,unnamed,unnamed,unnamed,unnamed,unnamed,unnamed,unnamed,unnamed,unnamed,unnamed,unnamed,unnamed,unnamed,unnamed,unnamed,unnamed,unnamed,unnamed,unnamed,unnamed,unnamed,unnamed,unnamed,unnamed,unnamed…	Brca1,Dusp1,Gipc1,Il31ra,Il6st,Limk1,Tnfrsf11a	Aarsd1,Acvr1b,Adam17,Adam8,Afap1l2,Agap2,Agk,Akt2,Apc,Apoa1,Apom,App,Arl2bp,Arrb1,Atg7,Axin2,B230120H23Rik,Bag5,Bcl10,Bmp7,Bmpr1a,Bmpr2,Braf,Brca1,Btrc,Cab39,Calca,Ccnd1,Ccnd2,Ccnh,Ccnk,Ccno,Ccnt1,Ccnt2,Ccny,Cd44,Cd80,Cdk5r1,Cdkn1b,Cdon,Chek1,Chordc1,Cpeb1,Cpeb2,Ctgf,Cyr61,Dab2ip,Ddx25,Dgkb,Dgke,Dgkg,Dgki,Dlg1,Drd2,Dusp1,Dusp19,Dusp3,Dusp4,Dusp8,Dusp9,Dyx1c1,Eef2k,Efna1,Efna5,Eif2c1,Eif2c2,Eif2c3…
GO Biological Process	GO:0016310	phosphorylation	248	0.0799	1	1	1.68	5.36	9	579	0.2	0.0155	6	237	960	unnamed,unnamed,unnamed,unnamed,unnamed,unnamed,unnamed,unnamed,unnamed	unnamed,unnamed,unnamed,unnamed,unnamed,unnamed,unnamed,unnamed,unnamed,unnamed,unnamed,unnamed,unnamed,unnamed,unnamed,unnamed,unnamed,unnamed,unnamed,unnamed,unnamed,unnamed,unnamed,unnamed,unnamed,unnamed,unnamed,unnamed,unnamed,unnamed,unnamed,unnamed,unnamed,unnamed,unnamed,unnamed,unnamed,unnamed,unnamed,unnamed,unnamed,unnamed,unnamed,unnamed,unnamed,unnamed,unnamed,unnamed,unnamed,unnamed…	Gak,Hipk4,Limk1,Pik3c2b,Ppip5k2,mt-Nd4	Acvr1b,Adam8,Adck3,Adrbk1,Agk,Agphd1,Ak8,Akap13,Akap4,Akap6,Akt2,Akt3,Alpk2,Ankk1,App,Atm,B230120H23Rik,Baz1b,Bcl2,Bcr,Bmp7,Bmpr1a,Bmpr1b,Bmpr2,Braf,Brd4,Brsk1,Camk2d,Camk4,Camkk2,Cbl,Ccnd1,Ccnh,Ccnt1,Cdc42bpa,Cdk14,Cdk5r1,Cdk7,Cdk8,Cdkl1,Cfl1,Chek1,Chka,Cit,Ckm,Ckmt2,Clk1,Clk2,Cmpk1,Cmpk2,Col4a3bp,Crk,Csnk1a1,Csnk1g2,Csnk2a1,Csnk2a2,D8Ertd82e,Dclk1,Dgkb,Dgke,Dgkg,Dld,Dolk,Dtymk,Dusp9,Dyrk1a,Dyrk…
GO Biological Process	GO:0043524	negative regulation of neuron apoptosis	249	0.0803	1	1	4.24	0.472	2	51	0.0444	0.0392	2	22	81	unnamed,unnamed	unnamed,unnamed,unnamed,unnamed,unnamed,unnamed,unnamed,unnamed,unnamed,unnamed,unnamed,unnamed,unnamed,unnamed,unnamed,unnamed,unnamed,unnamed,unnamed,unnamed,unnamed,unnamed,unnamed,unnamed,unnamed,unnamed,unnamed,unnamed,unnamed,unnamed,unnamed,unnamed,unnamed,unnamed,unnamed,unnamed,unnamed,unnamed,unnamed,unnamed,unnamed,unnamed,unnamed,unnamed,unnamed,unnamed,unnamed,unnamed,unnamed,unnamed…	Nefl,Sncb	Adam8,Barhl1,Bcl2,Braf,Gclc,Gclm,Grik2,Grin1,Hipk2,Htt,Msh2,Nefl,Ppargc1a,Psen1,Rasa1,Rhoa,Six1,Six4,Sncb,Sod1,Tgfa,Wfs1
GO Biological Process	GO:0071345	cellular response to cytokine stimulus	249	0.0803	1	1	4.24	0.472	2	51	0.0444	0.0392	2	26	191	unnamed,unnamed	unnamed,unnamed,unnamed,unnamed,unnamed,unnamed,unnamed,unnamed,unnamed,unnamed,unnamed,unnamed,unnamed,unnamed,unnamed,unnamed,unnamed,unnamed,unnamed,unnamed,unnamed,unnamed,unnamed,unnamed,unnamed,unnamed,unnamed,unnamed,unnamed,unnamed,unnamed,unnamed,unnamed,unnamed,unnamed,unnamed,unnamed,unnamed,unnamed,unnamed,unnamed,unnamed,unnamed,unnamed,unnamed,unnamed,unnamed,unnamed,unnamed,unnamed…	Il6st,Tnfrsf11a	Aqp4,Cx3cl1,Cxcl13,Dab2ip,Fkbp1a,Foxf1a,Gm614,Hmbs,Il12rb2,Il18bp,Il5ra,Il6st,Irak1,Irf1,Lep,Lifr,Plcb1,Rps6ka5,Rqcd1,Slc27a1,Stat1,Tnfrsf11a,Tnfsf11,Traf3,Vldlr,Zc3h15
GO Biological Process	GO:0045005	maintenance of fidelity involved in DNA-dependent DNA replication	251	0.0804	1	1	12	0.0833	1	9	0.0222	0.111	1	3	11	unnamed	unnamed,unnamed,unnamed,unnamed,unnamed,unnamed,unnamed,unnamed,unnamed	Tipin	C77370,Tipin,Tonsl
GO Biological Process	GO:0032786	positive regulation of transcription elongation, DNA-dependent	251	0.0804	1	1	12	0.0833	1	9	0.0222	0.111	1	3	8	unnamed	unnamed,unnamed,unnamed,unnamed,unnamed,unnamed,unnamed,unnamed,unnamed	Ell3	Brd4,Eapp,Ell3
GO Biological Process	GO:0071514	genetic imprinting	251	0.0804	1	1	12	0.0833	1	9	0.0222	0.111	1	4	20	unnamed	unnamed,unnamed,unnamed,unnamed,unnamed,unnamed,unnamed,unnamed,unnamed	Brca1	Brca1,Dnmt3a,Ndn,Prmt7
GO Biological Process	GO:0031650	regulation of heat generation	251	0.0804	1	1	12	0.0833	1	9	0.0222	0.111	1	3	13	unnamed	unnamed,unnamed,unnamed,unnamed,unnamed,unnamed,unnamed,unnamed,unnamed	Tnfrsf11a	Slc27a1,Tnfrsf11a,Tnfsf11
GO Biological Process	GO:0031652	positive regulation of heat generation	251	0.0804	1	1	12	0.0833	1	9	0.0222	0.111	1	3	12	unnamed	unnamed,unnamed,unnamed,unnamed,unnamed,unnamed,unnamed,unnamed,unnamed	Tnfrsf11a	Slc27a1,Tnfrsf11a,Tnfsf11
GO Biological Process	GO:0006412	translation	256	0.0807	1	1	2.95	1.02	3	110	0.0667	0.0273	1	54	315	unnamed,unnamed,unnamed	unnamed,unnamed,unnamed,unnamed,unnamed,unnamed,unnamed,unnamed,unnamed,unnamed,unnamed,unnamed,unnamed,unnamed,unnamed,unnamed,unnamed,unnamed,unnamed,unnamed,unnamed,unnamed,unnamed,unnamed,unnamed,unnamed,unnamed,unnamed,unnamed,unnamed,unnamed,unnamed,unnamed,unnamed,unnamed,unnamed,unnamed,unnamed,unnamed,unnamed,unnamed,unnamed,unnamed,unnamed,unnamed,unnamed,unnamed,unnamed,unnamed,unnamed…	Eif4h	Aarsd1,Cyld,Dalrd3,Dhx29,Eef1a2,Eef1b2,Eef2k,Eif2c3,Eif3c,Eif3d,Eif4a2,Eif4g3,Eif4h,Gars,Gatc,Gm5148,Gm9104,Iars2,Mrpl3,Mrpl35,Mrpl37,Mrpl47,Mrpl51,Mrps23,Mrps30,Mrps5,Mrps7,Mtfmt,Mtrf1l,Rars,Rpl10l,Rpl11,Rpl14,Rpl15,Rpl27,Rpl30,Rpl36al,Rpl38,Rpl39,Rpl5,Rpl8,Rps11,Rps15,Rps17,Rps20,Rps26,Rps4x,Rpsa,Sars,Sepsecs,Sox11,Tcea3,Vars2,Yars2
GO Biological Process	GO:0007067	mitosis	257	0.0842	1	1	2.89	1.04	3	112	0.0667	0.0268	2	50	245	unnamed,unnamed,unnamed	unnamed,unnamed,unnamed,unnamed,unnamed,unnamed,unnamed,unnamed,unnamed,unnamed,unnamed,unnamed,unnamed,unnamed,unnamed,unnamed,unnamed,unnamed,unnamed,unnamed,unnamed,unnamed,unnamed,unnamed,unnamed,unnamed,unnamed,unnamed,unnamed,unnamed,unnamed,unnamed,unnamed,unnamed,unnamed,unnamed,unnamed,unnamed,unnamed,unnamed,unnamed,unnamed,unnamed,unnamed,unnamed,unnamed,unnamed,unnamed,unnamed,unnamed…	Chfr,Tipin	4922501C03Rik,Anapc1,Anapc16,Anapc7,Apc,Arhgef2,Arl8a,Arpp19,Aspm,Bod1,Ccnk,Cdc6,Chfr,Cit,Cltc,Csnk1a1,Cul3,Dctn2,Dsn1,Fam83d,Haus3,Haus8,Ino80,Kif2a,Kif3b,Lmln,Mastl,Mau2,Mis12,Ncapd2,Nedd9,Nek1,Nek2,Nek4,Nup43,Nusap1,Pds5a,Pinx1,Pogz,Ppp2r2d,Rhoa,Stag2,Terf1,Tipin,Tubb5,Ube2c,Usp9x,Vcpip1,Wapal,Zfp828
GO Biological Process	GO:0051969	regulation of transmission of nerve impulse	258	0.0863	1	1	2.37	1.69	4	182	0.0889	0.022	4	64	192	unnamed,unnamed,unnamed,unnamed	unnamed,unnamed,unnamed,unnamed,unnamed,unnamed,unnamed,unnamed,unnamed,unnamed,unnamed,unnamed,unnamed,unnamed,unnamed,unnamed,unnamed,unnamed,unnamed,unnamed,unnamed,unnamed,unnamed,unnamed,unnamed,unnamed,unnamed,unnamed,unnamed,unnamed,unnamed,unnamed,unnamed,unnamed,unnamed,unnamed,unnamed,unnamed,unnamed,unnamed,unnamed,unnamed,unnamed,unnamed,unnamed,unnamed,unnamed,unnamed,unnamed,unnamed…	Cspg5,Gfap,Gipc1,S100b	Abhd6,Bcan,Calb1,Chrna7,Cntn2,Cpeb1,Cplx2,Cspg5,Ctnnb1,Dlg4,Drd2,Egr2,Gabbr1,Gfap,Gipc1,Glra1,Grik2,Grin1,Grin2a,Grin2b,Grin2c,Grm1,Grm3,Grm5,Hcrt,Hes5,Htr1b,Htr2a,Htt,Kcnc4,Kras,Mapk8ip2,Mtap1b,Nat8l,Ncdn,Ncs1,Neto1,Nlgn3,Nos1,Ntrk2,Ophn1,Pebp1,Pfn2,Pink1,Ppfia3,Ppp3ca,Prkce,Psen1,Pxk,Rab11a,Rapgef4,Rims1,S100b,Shank3,Slc18a1,Tac1,Tcf7l2,Tnr,Ucn,Unc13a,Usp46,Uts2,Vgf,Ywhag
GO Biological Process	GO:0033554	cellular response to stress	259	0.0872	1	1	1.93	3.11	6	336	0.133	0.0179	6	150	722	unnamed,unnamed,unnamed,unnamed,unnamed,unnamed	unnamed,unnamed,unnamed,unnamed,unnamed,unnamed,unnamed,unnamed,unnamed,unnamed,unnamed,unnamed,unnamed,unnamed,unnamed,unnamed,unnamed,unnamed,unnamed,unnamed,unnamed,unnamed,unnamed,unnamed,unnamed,unnamed,unnamed,unnamed,unnamed,unnamed,unnamed,unnamed,unnamed,unnamed,unnamed,unnamed,unnamed,unnamed,unnamed,unnamed,unnamed,unnamed,unnamed,unnamed,unnamed,unnamed,unnamed,unnamed,unnamed,unnamed…	Brca1,Gfap,Hspa1b,Mdm4,Nefl,Tipin	1500015O10Rik,2310003H01Rik,Adam8,Adnp2,Alkbh2,Alkbh3,Alkbh8,Apc,Asns,Atg4b,Atm,Atrx,B230120H23Rik,Baz1b,Bcl2,Bmpr2,Bnip3,Brca1,Brsk1,C77370,Ccnd1,Ccno,Cdk7,Chek1,Cinp,Clock,Col4a3bp,Cul4b,Dnaja1,Dnajc3,Dusp19,Dyrk2,E2f1,Epas1,Ercc3,Ern1,Ero1l,Etv5,Fam129a,Fancg,Fasl,Fbxo31,Fgf12,Foxo4,Gfap,Gm5136,Grin2b,Gtf2h2,Gtf2h5,Hipk2,Hspa1b,Ikbke,Il18bp,Ino80,Ino80d,Ints7,Jmy,Kat5,Kras,Lyn,Map3k13,Map3k5,M…
GO Biological Process	GO:0000087	M phase of mitotic cell cycle	260	0.0877	1	1	2.84	1.06	3	114	0.0667	0.0263	2	51	250	unnamed,unnamed,unnamed	unnamed,unnamed,unnamed,unnamed,unnamed,unnamed,unnamed,unnamed,unnamed,unnamed,unnamed,unnamed,unnamed,unnamed,unnamed,unnamed,unnamed,unnamed,unnamed,unnamed,unnamed,unnamed,unnamed,unnamed,unnamed,unnamed,unnamed,unnamed,unnamed,unnamed,unnamed,unnamed,unnamed,unnamed,unnamed,unnamed,unnamed,unnamed,unnamed,unnamed,unnamed,unnamed,unnamed,unnamed,unnamed,unnamed,unnamed,unnamed,unnamed,unnamed…	Chfr,Tipin	4922501C03Rik,Anapc1,Anapc16,Anapc7,Apc,Arhgef2,Arl8a,Arpp19,Aspm,Bod1,Ccnk,Cdc6,Chfr,Cit,Cltc,Csnk1a1,Cul3,Dctn2,Dsn1,Fam83d,Haus3,Haus8,Ino80,Kif2a,Kif3b,Lmln,Mastl,Mau2,Mis12,Ncapd2,Nedd9,Nek1,Nek2,Nek4,Nup43,Nusap1,Pds5a,Pinx1,Pogz,Ppp2r2d,Rhoa,Sirt7,Stag2,Terf1,Tipin,Tubb5,Ube2c,Usp9x,Vcpip1,Wapal,Zfp828
GO Biological Process	GO:0031576	G2/M transition checkpoint	261	0.0889	1	1	10.8	0.0926	1	10	0.0222	0.1	1	7	33	unnamed	unnamed,unnamed,unnamed,unnamed,unnamed,unnamed,unnamed,unnamed,unnamed,unnamed	Brca1	Atm,Brca1,Brsk1,Chek1,Foxo4,Gm5136,Taok3
GO Biological Process	GO:0031572	G2/M transition DNA damage checkpoint	261	0.0889	1	1	10.8	0.0926	1	10	0.0222	0.1	1	7	27	unnamed	unnamed,unnamed,unnamed,unnamed,unnamed,unnamed,unnamed,unnamed,unnamed,unnamed	Brca1	Atm,Brca1,Brsk1,Chek1,Foxo4,Gm5136,Taok3
GO Biological Process	GO:0033209	tumor necrosis factor-mediated signaling pathway	261	0.0889	1	1	10.8	0.0926	1	10	0.0222	0.1	1	3	15	unnamed	unnamed,unnamed,unnamed,unnamed,unnamed,unnamed,unnamed,unnamed,unnamed,unnamed	Tnfrsf11a	Tnfrsf11a,Tnfsf11,Traf3
GO Biological Process	GO:0031103	axon regeneration	261	0.0889	1	1	10.8	0.0926	1	10	0.0222	0.1	1	4	16	unnamed	unnamed,unnamed,unnamed,unnamed,unnamed,unnamed,unnamed,unnamed,unnamed,unnamed	Nefl	Bcl2,Mtap1b,Nefl,Tspo
GO Biological Process	GO:0033574	response to testosterone stimulus	261	0.0889	1	1	10.8	0.0926	1	10	0.0222	0.1	1	6	34	unnamed	unnamed,unnamed,unnamed,unnamed,unnamed,unnamed,unnamed,unnamed,unnamed,unnamed	Dusp1	Ccnd2,Dusp1,Kcnj11,Rps6kb1,Tspo,Uts2
GO Biological Process	GO:0042775	mitochondrial ATP synthesis coupled electron transport	261	0.0889	1	1	10.8	0.0926	1	10	0.0222	0.1	1	3	13	unnamed	unnamed,unnamed,unnamed,unnamed,unnamed,unnamed,unnamed,unnamed,unnamed,unnamed	mt-Nd4	Dld,Uqcr10,mt-Nd4
GO Biological Process	GO:0006282	regulation of DNA repair	261	0.0889	1	1	10.8	0.0926	1	10	0.0222	0.1	1	7	36	unnamed	unnamed,unnamed,unnamed,unnamed,unnamed,unnamed,unnamed,unnamed,unnamed,unnamed	Brca1	Axin2,Brca1,Chek1,Gm5136,Ppp4r2,Rnf168,Ube2n
GO Biological Process	GO:0001960	negative regulation of cytokine-mediated signaling pathway	261	0.0889	1	1	10.8	0.0926	1	10	0.0222	0.1	1	5	20	unnamed	unnamed,unnamed,unnamed,unnamed,unnamed,unnamed,unnamed,unnamed,unnamed,unnamed	Il6st	Il1f6,Il6st,Robo1,Slit2,Slit3
GO Biological Process	GO:0006084	acetyl-CoA metabolic process	261	0.0889	1	1	10.8	0.0926	1	10	0.0222	0.1	1	6	42	unnamed	unnamed,unnamed,unnamed,unnamed,unnamed,unnamed,unnamed,unnamed,unnamed,unnamed	Ogdhl	4933405O20Rik,Dld,Fh1,Ogdhl,Pdhb,Pmvk
GO Biological Process	GO:0006406	mRNA export from nucleus	261	0.0889	1	1	10.8	0.0926	1	10	0.0222	0.1	1	5	22	unnamed	unnamed,unnamed,unnamed,unnamed,unnamed,unnamed,unnamed,unnamed,unnamed,unnamed	Thoc3	Ddx25,Gle1,Nup107,Thoc3,Thoc5
GO Biological Process	GO:0006641	triglyceride metabolic process	261	0.0889	1	1	10.8	0.0926	1	10	0.0222	0.1	1	5	45	unnamed	unnamed,unnamed,unnamed,unnamed,unnamed,unnamed,unnamed,unnamed,unnamed,unnamed	Il6st	Cps1,G6pc,Il6st,Lpin1,Lpl
GO Biological Process	GO:0019751	polyol metabolic process	261	0.0889	1	1	10.8	0.0926	1	10	0.0222	0.1	1	6	37	unnamed	unnamed,unnamed,unnamed,unnamed,unnamed,unnamed,unnamed,unnamed,unnamed,unnamed	Ppip5k2	Got1,Gpd1l,Gyk,Itpka,Lep,Ppip5k2
GO Biological Process	GO:0031644	regulation of neurological system process	273	0.0946	1	1	2.3	1.74	4	188	0.0889	0.0213	4	66	203	unnamed,unnamed,unnamed,unnamed	unnamed,unnamed,unnamed,unnamed,unnamed,unnamed,unnamed,unnamed,unnamed,unnamed,unnamed,unnamed,unnamed,unnamed,unnamed,unnamed,unnamed,unnamed,unnamed,unnamed,unnamed,unnamed,unnamed,unnamed,unnamed,unnamed,unnamed,unnamed,unnamed,unnamed,unnamed,unnamed,unnamed,unnamed,unnamed,unnamed,unnamed,unnamed,unnamed,unnamed,unnamed,unnamed,unnamed,unnamed,unnamed,unnamed,unnamed,unnamed,unnamed,unnamed…	Cspg5,Gfap,Gipc1,S100b	Abhd6,Bcan,Calb1,Calca,Chrna7,Cntn2,Cpeb1,Cplx2,Cspg5,Ctnnb1,Dlg4,Drd2,Egr2,Gabbr1,Gfap,Gipc1,Glra1,Grik2,Grin1,Grin2a,Grin2b,Grin2c,Grm1,Grm3,Grm5,Hcrt,Hes5,Htr1b,Htr2a,Htt,Kcnc4,Kras,Mapk8ip2,Mtap1b,Nat8l,Ncdn,Ncs1,Neto1,Nlgn3,Nos1,Ntrk2,Ophn1,Oprd1,Pebp1,Pfn2,Pink1,Ppfia3,Ppp3ca,Prkce,Psen1,Pxk,Rab11a,Rapgef4,Rims1,S100b,Shank3,Slc18a1,Tac1,Tcf7l2,Tnr,Ucn,Unc13a,Usp46,Uts2,Vgf,Ywhag
GO Biological Process	GO:0009987	cellular process	274	0.0952	1	1	1.11	36.1	40	3899	0.889	0.0103	47	2294	12455	unnamed,unnamed,unnamed,unnamed,unnamed,unnamed,unnamed,unnamed,unnamed,unnamed,unnamed,unnamed,unnamed,unnamed,unnamed,unnamed,unnamed,unnamed,unnamed,unnamed,unnamed,unnamed,unnamed,unnamed,unnamed,unnamed,unnamed,unnamed,unnamed,unnamed,unnamed,unnamed,unnamed,unnamed,unnamed,unnamed,unnamed,unnamed,unnamed,unnamed	unnamed,unnamed,unnamed,unnamed,unnamed,unnamed,unnamed,unnamed,unnamed,unnamed,unnamed,unnamed,unnamed,unnamed,unnamed,unnamed,unnamed,unnamed,unnamed,unnamed,unnamed,unnamed,unnamed,unnamed,unnamed,unnamed,unnamed,unnamed,unnamed,unnamed,unnamed,unnamed,unnamed,unnamed,unnamed,unnamed,unnamed,unnamed,unnamed,unnamed,unnamed,unnamed,unnamed,unnamed,unnamed,unnamed,unnamed,unnamed,unnamed,unnamed…	Arvcf,Brca1,Chfr,Cplx1,Cspg5,Ctdspl2,Cwh43,Dach1,Dis3l,Dnajb1,Dusp1,Eif4h,Ell3,Epb4.1l1,Gabra2,Gabrg1,Gak,Gapdh,Gfap,Gipc1,Hipk4,Hspa1b,Ide,Il31ra,Il6st,Limk1,Mafg,March5,Mdm4,Mon2,Mzt1,Nefl,Nefm,Ogdhl,Olfr119,Olfr120,Pdia3,Pik3c2b,Ppip5k2,Rnd2,S100b,Sncb,Thoc3,Tipin,Tnfrsf11a,Txnrd2,mt-Nd4	1110017D15Rik,1500003O03Rik,1500010J02Rik,1500015O10Rik,2010001E11Rik,2310003H01Rik,2410022L05Rik,2410091C18Rik,2510012J08Rik,2610101N10Rik,2700078E11Rik,2810002N01Rik,2810405K02Rik,4632434I11Rik,4921515J06Rik,4922501C03Rik,4930449I24Rik,4930453N24Rik,4930596D02Rik,4933405O20Rik,5430411K18Rik,9030409G11Rik,A1cf,AI314180,AK028549,Aarsd1,Abca8b,Abcb5,Abcb7,Abcc4,Abcg1,Abcg4,Abhd5,Abi2,Ablim1,Acan,A…
GO Biological Process	GO:0045833	negative regulation of lipid metabolic process	275	0.0974	1	1	9.82	0.102	1	11	0.0222	0.0909	1	5	44	unnamed	unnamed,unnamed,unnamed,unnamed,unnamed,unnamed,unnamed,unnamed,unnamed,unnamed,unnamed	Brca1	Brca1,Dkk3,Pdgfa,Slc27a1,Sod1
GO Biological Process	GO:0046834	lipid phosphorylation	275	0.0974	1	1	9.82	0.102	1	11	0.0222	0.0909	1	7	25	unnamed	unnamed,unnamed,unnamed,unnamed,unnamed,unnamed,unnamed,unnamed,unnamed,unnamed,unnamed	Pik3c2b	Agk,Ip6k2,Pik3c2b,Pik3c3,Pik3ca,Pik3cd,Pip4k2a
GO Biological Process	GO:0045604	regulation of epidermal cell differentiation	275	0.0974	1	1	9.82	0.102	1	11	0.0222	0.0909	1	5	15	unnamed	unnamed,unnamed,unnamed,unnamed,unnamed,unnamed,unnamed,unnamed,unnamed,unnamed,unnamed	Mafg	Cyp27b1,Hoxa7,Keap1,Mafg,Tgfb2
GO Biological Process	GO:2000191	regulation of fatty acid transport	275	0.0974	1	1	9.82	0.102	1	11	0.0222	0.0909	1	4	13	unnamed	unnamed,unnamed,unnamed,unnamed,unnamed,unnamed,unnamed,unnamed,unnamed,unnamed,unnamed	Tnfrsf11a	Akt2,Irs2,Tnfrsf11a,Tnfsf11
GO Biological Process	GO:0051055	negative regulation of lipid biosynthetic process	275	0.0974	1	1	9.82	0.102	1	11	0.0222	0.0909	1	5	31	unnamed	unnamed,unnamed,unnamed,unnamed,unnamed,unnamed,unnamed,unnamed,unnamed,unnamed,unnamed	Brca1	Brca1,Dkk3,Pdgfa,Slc27a1,Sod1
GO Biological Process	GO:0006301	postreplication repair	275	0.0974	1	1	9.82	0.102	1	11	0.0222	0.0909	1	8	12	unnamed	unnamed,unnamed,unnamed,unnamed,unnamed,unnamed,unnamed,unnamed,unnamed,unnamed,unnamed	Brca1	Brca1,Msh2,Polh,Rev1,Rev3l,Ube2b,Ube2n,Ube2v2
GO Biological Process	GO:0001967	suckling behavior	275	0.0974	1	1	9.82	0.102	1	11	0.0222	0.0909	1	4	11	unnamed	unnamed,unnamed,unnamed,unnamed,unnamed,unnamed,unnamed,unnamed,unnamed,unnamed,unnamed	Dach1	App,Dach1,Grin1,Grin2b
GO Biological Process	GO:0042773	ATP synthesis coupled electron transport	275	0.0974	1	1	9.82	0.102	1	11	0.0222	0.0909	1	4	15	unnamed	unnamed,unnamed,unnamed,unnamed,unnamed,unnamed,unnamed,unnamed,unnamed,unnamed,unnamed	mt-Nd4	Dld,Ndufs1,Uqcr10,mt-Nd4
GO Biological Process	GO:0008630	DNA damage response, signal transduction resulting in induction of apoptosis	275	0.0974	1	1	9.82	0.102	1	11	0.0222	0.0909	1	7	31	unnamed	unnamed,unnamed,unnamed,unnamed,unnamed,unnamed,unnamed,unnamed,unnamed,unnamed,unnamed	Brca1	Atm,Brca1,Dyrk2,Ikbke,Mlh1,Msh2,Sfn
GO Biological Process	GO:0032892	positive regulation of organic acid transport	275	0.0974	1	1	9.82	0.102	1	11	0.0222	0.0909	1	3	12	unnamed	unnamed,unnamed,unnamed,unnamed,unnamed,unnamed,unnamed,unnamed,unnamed,unnamed,unnamed	Tnfrsf11a	Tnfrsf11a,Tnfsf11,Trh
GO Biological Process	GO:0032501	multicellular organismal process	285	0.102	1	1	1.27	17.4	22	1874	0.489	0.0117	23	846	5164	unnamed,unnamed,unnamed,unnamed,unnamed,unnamed,unnamed,unnamed,unnamed,unnamed,unnamed,unnamed,unnamed,unnamed,unnamed,unnamed,unnamed,unnamed,unnamed,unnamed,unnamed,unnamed	unnamed,unnamed,unnamed,unnamed,unnamed,unnamed,unnamed,unnamed,unnamed,unnamed,unnamed,unnamed,unnamed,unnamed,unnamed,unnamed,unnamed,unnamed,unnamed,unnamed,unnamed,unnamed,unnamed,unnamed,unnamed,unnamed,unnamed,unnamed,unnamed,unnamed,unnamed,unnamed,unnamed,unnamed,unnamed,unnamed,unnamed,unnamed,unnamed,unnamed,unnamed,unnamed,unnamed,unnamed,unnamed,unnamed,unnamed,unnamed,unnamed,unnamed…	Brca1,Cd7,Cplx1,Cspg5,Dach1,Dip2a,Dusp1,Gabra2,Gabrg1,Gfap,Gipc1,Il31ra,Il6st,Limk1,Mafg,Nefl,Nefm,Olfr119,Olfr120,S100b,Tnfrsf11a,Txnrd2,mt-Nd4	4930447C04Rik,9030409G11Rik,AI848100,AK028549,Abcg1,Abi2,Ablim1,Acan,Acat1,Acr,Acsl6,Acvr1b,Adam17,Adam19,Adam8,Adcy5,Add2,Adnp2,Adra1d,Adrb1,Adrbk1,Aes,Aff2,Aff3,Afg3l2,Agap2,Agfg1,Agr2,Agtpbp1,Ahr,Akt2,Alcam,Aldh5a1,Aldh9a1,Amph,Ank2,Ankrd11,Anks1,Apba1,Apba2,Apbb2,Apc,Aph1c,Apoa1,Apold1,Apom,App,Aqp11,Aqp4,Ar,Arf4,Arf6,Arhgap22,Arhgef2,Arid5b,Arnt2,Arsa,Asah1,Asb1,Asns,Aspm,Atf1,Atf2,Atg7,Atm,…
GO Biological Process	GO:0048872	homeostasis of number of cells	286	0.103	1	1	3.66	0.546	2	59	0.0444	0.0339	1	27	134	unnamed,unnamed	unnamed,unnamed,unnamed,unnamed,unnamed,unnamed,unnamed,unnamed,unnamed,unnamed,unnamed,unnamed,unnamed,unnamed,unnamed,unnamed,unnamed,unnamed,unnamed,unnamed,unnamed,unnamed,unnamed,unnamed,unnamed,unnamed,unnamed,unnamed,unnamed,unnamed,unnamed,unnamed,unnamed,unnamed,unnamed,unnamed,unnamed,unnamed,unnamed,unnamed,unnamed,unnamed,unnamed,unnamed,unnamed,unnamed,unnamed,unnamed,unnamed,unnamed…	Cd7	Ahr,Bcl2,Bcl2l11,Cd7,Chst3,Epas1,Fh1,Hcls1,Ireb2,Klhl10,Ldb1,Lyn,Mb,Mll5,Mtap7,Pik3cd,Plcb1,Prdx1,Prdx2,Rcor1,Sash3,Sod1,Tgfb2,Tnfrsf13b,Tnfrsf13c,Tnfsf13b,Vegfa
GO Biological Process	GO:0045768	positive regulation of anti-apoptosis	287	0.106	1	1	9	0.111	1	12	0.0222	0.0833	1	6	35	unnamed	unnamed,unnamed,unnamed,unnamed,unnamed,unnamed,unnamed,unnamed,unnamed,unnamed,unnamed,unnamed	Dusp1	Ctnnb1,Dusp1,Lifr,Opa1,Rasa1,Rnf144b
GO Biological Process	GO:0060759	regulation of response to cytokine stimulus	287	0.106	1	1	9	0.111	1	12	0.0222	0.0833	1	7	36	unnamed	unnamed,unnamed,unnamed,unnamed,unnamed,unnamed,unnamed,unnamed,unnamed,unnamed,unnamed,unnamed	Il6st	Il1f6,Il6st,Irak1,Robo1,Slit2,Slit3,Sphk1
GO Biological Process	GO:0042517	positive regulation of tyrosine phosphorylation of Stat3 protein	287	0.106	1	1	9	0.111	1	12	0.0222	0.0833	2	7	20	unnamed	unnamed,unnamed,unnamed,unnamed,unnamed,unnamed,unnamed,unnamed,unnamed,unnamed,unnamed,unnamed	Il31ra,Il6st	Arl2bp,Fgfr3,Hes1,Hes5,Il31ra,Il6st,Lep
GO Biological Process	GO:0042516	regulation of tyrosine phosphorylation of Stat3 protein	287	0.106	1	1	9	0.111	1	12	0.0222	0.0833	2	7	25	unnamed	unnamed,unnamed,unnamed,unnamed,unnamed,unnamed,unnamed,unnamed,unnamed,unnamed,unnamed,unnamed	Il31ra,Il6st	Arl2bp,Fgfr3,Hes1,Hes5,Il31ra,Il6st,Lep
GO Biological Process	GO:0000725	recombinational repair	287	0.106	1	1	9	0.111	1	12	0.0222	0.0833	1	6	31	unnamed	unnamed,unnamed,unnamed,unnamed,unnamed,unnamed,unnamed,unnamed,unnamed,unnamed,unnamed,unnamed	Brca1	Brca1,Ino80,Rad52,Tonsl,Ube2n,Yy1
GO Biological Process	GO:0001959	regulation of cytokine-mediated signaling pathway	287	0.106	1	1	9	0.111	1	12	0.0222	0.0833	1	7	35	unnamed	unnamed,unnamed,unnamed,unnamed,unnamed,unnamed,unnamed,unnamed,unnamed,unnamed,unnamed,unnamed	Il6st	Il1f6,Il6st,Irak1,Robo1,Slit2,Slit3,Sphk1
GO Biological Process	GO:0000724	double-strand break repair via homologous recombination	287	0.106	1	1	9	0.111	1	12	0.0222	0.0833	1	6	30	unnamed	unnamed,unnamed,unnamed,unnamed,unnamed,unnamed,unnamed,unnamed,unnamed,unnamed,unnamed,unnamed	Brca1	Brca1,Ino80,Rad52,Tonsl,Ube2n,Yy1
GO Biological Process	GO:0044092	negative regulation of molecular function	294	0.108	1	1	1.96	2.55	5	275	0.111	0.0182	3	107	540	unnamed,unnamed,unnamed,unnamed,unnamed	unnamed,unnamed,unnamed,unnamed,unnamed,unnamed,unnamed,unnamed,unnamed,unnamed,unnamed,unnamed,unnamed,unnamed,unnamed,unnamed,unnamed,unnamed,unnamed,unnamed,unnamed,unnamed,unnamed,unnamed,unnamed,unnamed,unnamed,unnamed,unnamed,unnamed,unnamed,unnamed,unnamed,unnamed,unnamed,unnamed,unnamed,unnamed,unnamed,unnamed,unnamed,unnamed,unnamed,unnamed,unnamed,unnamed,unnamed,unnamed,unnamed,unnamed…	Dusp1,Hspa1b,Limk1	AK028549,Adcy5,Akt2,Apc,Apoa1,App,Arrb1,Bag5,Bmp7,Cand1,Cd46,Cdkn1b,Chordc1,Cln8,Col28a1,Crim1,Cyld,Cyp27b1,Dab2ip,Drd2,Dusp1,Dusp19,Dusp3,Dusp4,Dusp8,Dusp9,Egln1,Epb4.1l5,Fkbp1a,Foxs1,Gabbr1,Gnaq,Gstp1,Gtpbp4,Hand1,Hdac4,Heyl,Hipk3,Hmgcr,Hspa1b,Hspb1,Irak1,Irs2,Lax1,Limk1,Lrp6,Lxn,Mapk8,Mastl,Naip1,Ncs1,Ndfip1,Nek2,Nfkbia,Nos1,Oaz2-ps,Oprd1,Oxa1l,Papln,Pax2,Pcid2,Pcsk1n,Pebp1,Pex14,Pias4,Pim1,Pk…
GO Biological Process	GO:0043627	response to estrogen stimulus	295	0.109	1	1	3.54	0.565	2	61	0.0444	0.0328	2	29	161	unnamed,unnamed	unnamed,unnamed,unnamed,unnamed,unnamed,unnamed,unnamed,unnamed,unnamed,unnamed,unnamed,unnamed,unnamed,unnamed,unnamed,unnamed,unnamed,unnamed,unnamed,unnamed,unnamed,unnamed,unnamed,unnamed,unnamed,unnamed,unnamed,unnamed,unnamed,unnamed,unnamed,unnamed,unnamed,unnamed,unnamed,unnamed,unnamed,unnamed,unnamed,unnamed,unnamed,unnamed,unnamed,unnamed,unnamed,unnamed,unnamed,unnamed,unnamed,unnamed…	Brca1,Dusp1	Ahr,Arnt2,Bcl2,Bdh1,Brca1,Ccnd1,Ccnd2,Ctgf,Ctnnb1,Cyp27b1,Dusp1,Ghrl,Gstp1,Hmbs,Mmp13,Mmp15,Mtap1b,Naip1,Ncoa1,Nkx2-5,Nrf1,Ntm,Prdm2,Prkca,Slc25a36,Tbl1x,Tgfb2,Timp3,Ucn
GO Biological Process	GO:0043065	positive regulation of apoptosis	296	0.111	1	1	2.17	1.84	4	199	0.0889	0.0201	4	90	408	unnamed,unnamed,unnamed,unnamed	unnamed,unnamed,unnamed,unnamed,unnamed,unnamed,unnamed,unnamed,unnamed,unnamed,unnamed,unnamed,unnamed,unnamed,unnamed,unnamed,unnamed,unnamed,unnamed,unnamed,unnamed,unnamed,unnamed,unnamed,unnamed,unnamed,unnamed,unnamed,unnamed,unnamed,unnamed,unnamed,unnamed,unnamed,unnamed,unnamed,unnamed,unnamed,unnamed,unnamed,unnamed,unnamed,unnamed,unnamed,unnamed,unnamed,unnamed,unnamed,unnamed,unnamed…	Brca1,Dusp1,Pdia3,S100b	2810002N01Rik,Adam8,Aifm3,Apbb2,Apc,App,Atm,B230120H23Rik,Bag1,Bcl10,Bcl2l11,Bmp7,Bnip1,Bnip3,Brca1,C6,Cdk5r1,Cdkn1b,Crh,Csrnp3,Ctnnb1,Dab2ip,Dedd2,Diablo,Dusp1,Dyrk2,Efhc1,Ercc3,Ern1,Fasl,Fgfr3,Frzb,Gch1,Hspd1,Ikbke,Ip6k2,Itgb1,Jmy,Khdc1b,Klf11,Lrp6,Lyst,Mal,Map2k6,Map3k5,Map3k9,Mapk8,Mapk9,Mlh1,Mllt11,Msh2,Nacc1,Naif1,Ndufa13,Nell1,Nlrp1a,Nod1,Notch2,Pawr,Pdcd7,Pdia3,Pias4,Ppp1r13b,Prdx1,Prkca,…
GO Biological Process	GO:0030097	hemopoiesis	297	0.112	1	1	2.55	1.18	3	127	0.0667	0.0236	3	53	332	unnamed,unnamed,unnamed	unnamed,unnamed,unnamed,unnamed,unnamed,unnamed,unnamed,unnamed,unnamed,unnamed,unnamed,unnamed,unnamed,unnamed,unnamed,unnamed,unnamed,unnamed,unnamed,unnamed,unnamed,unnamed,unnamed,unnamed,unnamed,unnamed,unnamed,unnamed,unnamed,unnamed,unnamed,unnamed,unnamed,unnamed,unnamed,unnamed,unnamed,unnamed,unnamed,unnamed,unnamed,unnamed,unnamed,unnamed,unnamed,unnamed,unnamed,unnamed,unnamed,unnamed…	Il31ra,Tnfrsf11a,Txnrd2	Adam17,Add2,Ahr,Apc,Atm,Bcl2,Camk4,Ctnnb1,Epas1,Fzd8,Fzd9,Gab2,Hcls1,Hs1bp3,Il31ra,Ireb2,Irf1,Jag2,Junb,Ldb1,Lyl1,Lyn,Mb,Mll5,Msh2,Ncaph2,Nkx2-5,Pbx3,Picalm,Plcb1,Plcg2,Pou2f2,Prkx,Psen1,Rbpj,Rcor1,Rtkn2,Tcf7,Tesc,Tgfb2,Tgfbr2,Thoc5,Tm7sf4,Tnfrsf11a,Tnfsf11,Tshr,Twsg1,Txnrd2,Vegfa,Vps33a,Wnt2b,Wwp1,Zbtb16
GO Biological Process	GO:0009314	response to radiation	297	0.112	1	1	2.55	1.18	3	127	0.0667	0.0236	3	57	272	unnamed,unnamed,unnamed	unnamed,unnamed,unnamed,unnamed,unnamed,unnamed,unnamed,unnamed,unnamed,unnamed,unnamed,unnamed,unnamed,unnamed,unnamed,unnamed,unnamed,unnamed,unnamed,unnamed,unnamed,unnamed,unnamed,unnamed,unnamed,unnamed,unnamed,unnamed,unnamed,unnamed,unnamed,unnamed,unnamed,unnamed,unnamed,unnamed,unnamed,unnamed,unnamed,unnamed,unnamed,unnamed,unnamed,unnamed,unnamed,unnamed,unnamed,unnamed,unnamed,unnamed…	Brca1,Dusp1,Tipin	Acan,App,Arrb1,Asns,Atm,Atp1a3,Atxn1,B230120H23Rik,Bcl2,Brca1,Brsk1,Cacna1e,Ccnd1,Chek1,Clk2,Clock,Cyp2r1,Drd2,Dusp1,Ercc3,Fancg,Gm5136,Grin1,Grin2a,Hmgcr,Htt,Ino80,Ints7,Itgb1,Junb,Kras,Mapk8,Mat2a,Msh2,Nek1,Neto1,Nlgn3,Opn1sw,Opn5,Paxip1,Polh,Rad18,Rad9,Rev1,Rhob,Rnf168,Slc1a2,Stk11,Tgfb2,Tipin,Tnfsf11,Trim32,Ube2a,Ube2b,Usp47,Vcam1,Yy1
GO Biological Process	GO:0043068	positive regulation of programmed cell death	299	0.112	1	1	2.16	1.85	4	200	0.0889	0.02	4	91	411	unnamed,unnamed,unnamed,unnamed	unnamed,unnamed,unnamed,unnamed,unnamed,unnamed,unnamed,unnamed,unnamed,unnamed,unnamed,unnamed,unnamed,unnamed,unnamed,unnamed,unnamed,unnamed,unnamed,unnamed,unnamed,unnamed,unnamed,unnamed,unnamed,unnamed,unnamed,unnamed,unnamed,unnamed,unnamed,unnamed,unnamed,unnamed,unnamed,unnamed,unnamed,unnamed,unnamed,unnamed,unnamed,unnamed,unnamed,unnamed,unnamed,unnamed,unnamed,unnamed,unnamed,unnamed…	Brca1,Dusp1,Pdia3,S100b	2810002N01Rik,Adam8,Aifm3,Apbb2,Apc,App,Atm,B230120H23Rik,Bag1,Bcl10,Bcl2l11,Bmp7,Bnip1,Bnip3,Brca1,C6,Cdk5r1,Cdkn1b,Crh,Csrnp3,Ctnnb1,Dab2ip,Dedd2,Diablo,Dusp1,Dyrk2,Efhc1,Ercc3,Ern1,Fasl,Fgfr3,Frzb,Gch1,Hspd1,Ikbke,Ip6k2,Itgb1,Itm2c,Jmy,Khdc1b,Klf11,Lrp6,Lyst,Mal,Map2k6,Map3k5,Map3k9,Mapk8,Mapk9,Mlh1,Mllt11,Msh2,Nacc1,Naif1,Ndufa13,Nell1,Nlrp1a,Nod1,Notch2,Pawr,Pdcd7,Pdia3,Pias4,Ppp1r13b,Prdx1,…
GO Biological Process	GO:0019538	protein metabolic process	300	0.113	1	1	1.34	11.9	16	1286	0.356	0.0124	11	595	2815	unnamed,unnamed,unnamed,unnamed,unnamed,unnamed,unnamed,unnamed,unnamed,unnamed,unnamed,unnamed,unnamed,unnamed,unnamed,unnamed	unnamed,unnamed,unnamed,unnamed,unnamed,unnamed,unnamed,unnamed,unnamed,unnamed,unnamed,unnamed,unnamed,unnamed,unnamed,unnamed,unnamed,unnamed,unnamed,unnamed,unnamed,unnamed,unnamed,unnamed,unnamed,unnamed,unnamed,unnamed,unnamed,unnamed,unnamed,unnamed,unnamed,unnamed,unnamed,unnamed,unnamed,unnamed,unnamed,unnamed,unnamed,unnamed,unnamed,unnamed,unnamed,unnamed,unnamed,unnamed,unnamed,unnamed…	Brca1,Chfr,Cwh43,Dnajb1,Dusp1,Eif4h,Gak,Hipk4,Ide,Limk1,March5	1500015O10Rik,2410022L05Rik,2700078E11Rik,4930444G20Rik,AF366264,AI314180,Aarsd1,Abhd5,Acr,Acvr1b,Adam17,Adam19,Adam23,Adam33,Adam8,Adamts19,Adamts3,Adamts4,Adrbk1,Afg3l1,Afg3l2,Agtpbp1,Ahsa1,Akt2,Akt3,Alpk2,Amz1,Anapc1,Anapc16,Anapc7,Ankk1,Aph1c,App,Arih1,Arrb1,Asphd1,Asphd2,Asrgl1,Atg4b,Atg7,Atm,Atxn3,B230120H23Rik,B3galnt1,B3galt2,B3gnt3,B3gnt7,Baz1b,Bbs10,Bcl2,Bcr,Bmp7,Bmpr1a,Bmpr1b,Bmpr2,Bra…
GO Biological Process	GO:0051085	chaperone mediated protein folding requiring cofactor	301	0.114	1	1	8.31	0.12	1	13	0.0222	0.0769	1	4	12	unnamed	unnamed,unnamed,unnamed,unnamed,unnamed,unnamed,unnamed,unnamed,unnamed,unnamed,unnamed,unnamed,unnamed	Dnajb1	Dnajb1,Ero1l,Hspa8,Tor1a
GO Biological Process	GO:0051258	protein polymerization	301	0.114	1	1	8.31	0.12	1	13	0.0222	0.0769	1	8	46	unnamed	unnamed,unnamed,unnamed,unnamed,unnamed,unnamed,unnamed,unnamed,unnamed,unnamed,unnamed,unnamed,unnamed	Nefl	Mtss1,Nefl,Tppp,Tuba8,Tubb5,Tubb6,Ube2c,Vil1
GO Biological Process	GO:0051084	'de novo' posttranslational protein folding	301	0.114	1	1	8.31	0.12	1	13	0.0222	0.0769	1	4	15	unnamed	unnamed,unnamed,unnamed,unnamed,unnamed,unnamed,unnamed,unnamed,unnamed,unnamed,unnamed,unnamed,unnamed	Dnajb1	Dnajb1,Ero1l,Hspa8,Tor1a
GO Biological Process	GO:0071356	cellular response to tumor necrosis factor	301	0.114	1	1	8.31	0.12	1	13	0.0222	0.0769	1	6	37	unnamed	unnamed,unnamed,unnamed,unnamed,unnamed,unnamed,unnamed,unnamed,unnamed,unnamed,unnamed,unnamed,unnamed	Tnfrsf11a	Dab2ip,Il18bp,Irf1,Tnfrsf11a,Tnfsf11,Traf3
GO Biological Process	GO:0060251	regulation of glial cell proliferation	301	0.114	1	1	8.31	0.12	1	13	0.0222	0.0769	1	6	12	unnamed	unnamed,unnamed,unnamed,unnamed,unnamed,unnamed,unnamed,unnamed,unnamed,unnamed,unnamed,unnamed,unnamed	Gfap	Etv5,Gfap,Hes1,Lyn,Sox11,Tspo
GO Biological Process	GO:0019217	regulation of fatty acid metabolic process	301	0.114	1	1	8.31	0.12	1	13	0.0222	0.0769	1	5	47	unnamed	unnamed,unnamed,unnamed,unnamed,unnamed,unnamed,unnamed,unnamed,unnamed,unnamed,unnamed,unnamed,unnamed	Brca1	Akt2,Ankrd26,Brca1,Irs2,Ppargc1a
GO Biological Process	GO:0006119	oxidative phosphorylation	301	0.114	1	1	8.31	0.12	1	13	0.0222	0.0769	1	5	18	unnamed	unnamed,unnamed,unnamed,unnamed,unnamed,unnamed,unnamed,unnamed,unnamed,unnamed,unnamed,unnamed,unnamed	mt-Nd4	Dld,Msh2,Ndufs1,Uqcr10,mt-Nd4
GO Biological Process	GO:0000305	response to oxygen radical	301	0.114	1	1	8.31	0.12	1	13	0.0222	0.0769	1	7	15	unnamed	unnamed,unnamed,unnamed,unnamed,unnamed,unnamed,unnamed,unnamed,unnamed,unnamed,unnamed,unnamed,unnamed	Txnrd2	Mpo,Mt3,Prdx1,Prdx2,Sod1,Sod3,Txnrd2
GO Biological Process	GO:0006638	neutral lipid metabolic process	301	0.114	1	1	8.31	0.12	1	13	0.0222	0.0769	1	8	55	unnamed	unnamed,unnamed,unnamed,unnamed,unnamed,unnamed,unnamed,unnamed,unnamed,unnamed,unnamed,unnamed,unnamed	Il6st	Agpat5,Cdipt,Cps1,G6pc,Il6st,Lpin1,Lpl,Ppap2a
GO Biological Process	GO:0006639	acylglycerol metabolic process	301	0.114	1	1	8.31	0.12	1	13	0.0222	0.0769	1	8	53	unnamed	unnamed,unnamed,unnamed,unnamed,unnamed,unnamed,unnamed,unnamed,unnamed,unnamed,unnamed,unnamed,unnamed	Il6st	Agpat5,Cdipt,Cps1,G6pc,Il6st,Lpin1,Lpl,Ppap2a
GO Biological Process	GO:0000302	response to reactive oxygen species	311	0.115	1	1	3.43	0.583	2	63	0.0444	0.0317	2	28	101	unnamed,unnamed	unnamed,unnamed,unnamed,unnamed,unnamed,unnamed,unnamed,unnamed,unnamed,unnamed,unnamed,unnamed,unnamed,unnamed,unnamed,unnamed,unnamed,unnamed,unnamed,unnamed,unnamed,unnamed,unnamed,unnamed,unnamed,unnamed,unnamed,unnamed,unnamed,unnamed,unnamed,unnamed,unnamed,unnamed,unnamed,unnamed,unnamed,unnamed,unnamed,unnamed,unnamed,unnamed,unnamed,unnamed,unnamed,unnamed,unnamed,unnamed,unnamed,unnamed…	Dusp1,Txnrd2	Adrbk1,Bcl2,Bnip3,Dusp1,Gja3,Gnao1,Gstp1,Il18bp,Map3k5,Mb,Mpo,Mt3,Pax2,Pld2,Plekha1,Ppargc1b,Ppp1r15b,Ppp2ca,Prdx1,Prdx2,Prdx5,Prdx6,Prkca,Rhob,Sdc1,Sod1,Sod3,Txnrd2
GO Biological Process	GO:0022402	cell cycle process	312	0.116	1	1	1.92	2.6	5	281	0.111	0.0178	4	124	555	unnamed,unnamed,unnamed,unnamed,unnamed	unnamed,unnamed,unnamed,unnamed,unnamed,unnamed,unnamed,unnamed,unnamed,unnamed,unnamed,unnamed,unnamed,unnamed,unnamed,unnamed,unnamed,unnamed,unnamed,unnamed,unnamed,unnamed,unnamed,unnamed,unnamed,unnamed,unnamed,unnamed,unnamed,unnamed,unnamed,unnamed,unnamed,unnamed,unnamed,unnamed,unnamed,unnamed,unnamed,unnamed,unnamed,unnamed,unnamed,unnamed,unnamed,unnamed,unnamed,unnamed,unnamed,unnamed…	Brca1,Chfr,Mdm4,Tipin	1500015O10Rik,4632434I11Rik,4922501C03Rik,Adam17,Anapc1,Anapc16,Anapc7,Apbb2,Apc,App,Arhgef2,Arl8a,Arpp19,Aspm,Atm,B230120H23Rik,Bbs4,Bcl2,Bod1,Brca1,Brd4,Brsk1,C77370,Camk2d,Ccnd1,Ccnk,Ccny,Cdc6,Cdk14,Cdk5rap2,Cdkn1b,Chek1,Chfr,Cit,Clgn,Cltc,Cpeb1,Csnk1a1,Ctnnb1,Cul3,Cyp26b1,Cyp27b1,Dctn2,Dsn1,E2f1,Eif4g3,Ern1,Fam83d,Fmn2,Foxo4,Gpr132,Haus3,Haus6,Haus8,Hdac3,Hspa2,Id4,Ino80,Insc,Itgb1,Jmy,Kif2a,…
GO Biological Process	GO:0051493	regulation of cytoskeleton organization	313	0.116	1	1	2.51	1.19	3	129	0.0667	0.0233	1	48	198	unnamed,unnamed,unnamed	unnamed,unnamed,unnamed,unnamed,unnamed,unnamed,unnamed,unnamed,unnamed,unnamed,unnamed,unnamed,unnamed,unnamed,unnamed,unnamed,unnamed,unnamed,unnamed,unnamed,unnamed,unnamed,unnamed,unnamed,unnamed,unnamed,unnamed,unnamed,unnamed,unnamed,unnamed,unnamed,unnamed,unnamed,unnamed,unnamed,unnamed,unnamed,unnamed,unnamed,unnamed,unnamed,unnamed,unnamed,unnamed,unnamed,unnamed,unnamed,unnamed,unnamed…	Limk1	Actr3b,Add2,Apc,Arap1,Arf6,Arhgef2,Arpc3,Arpc5,Capn6,Capza2,Cdk5r1,Cdk5rap2,Cdkn1b,Cfl1,Chek1,Chordc1,Clip1,Crk,Ctnnb1,Cyld,Dlg1,Dstn,Efna5,Epha5,Fert2,Gpr65,Jmy,Limk1,Mtap1b,Nck1,Nek2,Nexn,Pak3,Pfn2,Plk4,Rasa1,Rhoa,Slit2,Spna2,Ssh1,Ssh2,Stmn2,Synpo,Tac1,Terf1,Vangl2,Vil1,Wnt11
GO Biological Process	GO:0048285	organelle fission	313	0.116	1	1	2.51	1.19	3	129	0.0667	0.0233	2	56	257	unnamed,unnamed,unnamed	unnamed,unnamed,unnamed,unnamed,unnamed,unnamed,unnamed,unnamed,unnamed,unnamed,unnamed,unnamed,unnamed,unnamed,unnamed,unnamed,unnamed,unnamed,unnamed,unnamed,unnamed,unnamed,unnamed,unnamed,unnamed,unnamed,unnamed,unnamed,unnamed,unnamed,unnamed,unnamed,unnamed,unnamed,unnamed,unnamed,unnamed,unnamed,unnamed,unnamed,unnamed,unnamed,unnamed,unnamed,unnamed,unnamed,unnamed,unnamed,unnamed,unnamed…	Chfr,Tipin	4922501C03Rik,Anapc1,Anapc16,Anapc7,Apc,Arhgef2,Arl8a,Arpp19,Aspm,Bnip3,Bod1,Ccnk,Cdc6,Chfr,Cit,Cltc,Cox10,Csnk1a1,Cul3,Dctn2,Dnm1l,Dsn1,Fam83d,Fis1,Haus3,Haus8,Ino80,Kif2a,Kif3b,Lmln,Lpin1,Mastl,Mau2,Mis12,Ncapd2,Nedd9,Nek1,Nek2,Nek4,Nup43,Nusap1,Pds5a,Pinx1,Pogz,Ppp2r2d,Rhoa,Stag2,Terf1,Tipin,Tubb5,Ube2c,Usp9x,Vcpip1,Wapal,Zbtb9,Zfp828
GO Biological Process	GO:0030003	cellular cation homeostasis	313	0.116	1	1	2.51	1.19	3	129	0.0667	0.0233	3	60	253	unnamed,unnamed,unnamed	unnamed,unnamed,unnamed,unnamed,unnamed,unnamed,unnamed,unnamed,unnamed,unnamed,unnamed,unnamed,unnamed,unnamed,unnamed,unnamed,unnamed,unnamed,unnamed,unnamed,unnamed,unnamed,unnamed,unnamed,unnamed,unnamed,unnamed,unnamed,unnamed,unnamed,unnamed,unnamed,unnamed,unnamed,unnamed,unnamed,unnamed,unnamed,unnamed,unnamed,unnamed,unnamed,unnamed,unnamed,unnamed,unnamed,unnamed,unnamed,unnamed,unnamed…	Il6st,Mafg,S100b	Abcb7,App,Aqp11,Arf1,Atp2a2,Atp6v0c,Bcl2,Calca,Ccdc109a,Cherp,Clstn1,Cul5,Cxcl13,Drd2,Efhc1,Fasl,Fkbp1a,Galr2,Ghrl,Grik2,Grin1,Hcrt,Htr2a,Il6st,Ireb2,Itgav,Itgb1,Jph2,Kcna5,Mafg,Mchr1,Mt1,Mt3,Ncaph2,Ndfip1,Ndn,Nr3c2,Pde6a,Pkd2,Plcg2,Pln,Prkca,Prkce,Psen1,Ryr2,Ryr3,S100b,Slc22a17,Slc24a3,Slc39a5,Slc4a3,Slc8a3,Sod1,Stim2,Sv2a,Tac1,Tgfa,Tymp,Uts2,Wfs1
GO Biological Process	GO:0051239	regulation of multicellular organismal process	316	0.117	1	1	1.46	7.51	11	811	0.244	0.0136	10	345	1501	unnamed,unnamed,unnamed,unnamed,unnamed,unnamed,unnamed,unnamed,unnamed,unnamed,unnamed	unnamed,unnamed,unnamed,unnamed,unnamed,unnamed,unnamed,unnamed,unnamed,unnamed,unnamed,unnamed,unnamed,unnamed,unnamed,unnamed,unnamed,unnamed,unnamed,unnamed,unnamed,unnamed,unnamed,unnamed,unnamed,unnamed,unnamed,unnamed,unnamed,unnamed,unnamed,unnamed,unnamed,unnamed,unnamed,unnamed,unnamed,unnamed,unnamed,unnamed,unnamed,unnamed,unnamed,unnamed,unnamed,unnamed,unnamed,unnamed,unnamed,unnamed…	Cspg5,Gfap,Gipc1,Il6st,Limk1,Mafg,Nefl,Nefm,S100b,Tnfrsf11a	AK028549,Abhd6,Adam17,Adam33,Adam8,Adra1d,Adrb1,Adrbk1,Afap1l2,Afg3l2,Agap2,Ahr,Ankrd26,Anxa6,Apc,Apoa1,Apold1,App,Ar,Arf6,Arhgef2,Arrb1,Aspm,Atf1,Atf2,Atoh1,Atp2a2,Atrn,Axin2,BC096441,Bcan,Bcl10,Bcl2,Bhlhe23,Bmp7,Bmpr1a,Bmpr1b,Bmpr2,C5ar1,C6,Cacna1b,Cacna1e,Cadm1,Calb1,Calca,Camk2d,Cblb,Ccnd1,Ccnd2,Cd276,Cd83,Cdh4,Cdk5r1,Cdk5rap2,Cdkn1b,Cdon,Chn1,Chrm2,Chrna7,Cit,Cntn2,Cntn4,Cpeb1,Cplx2,Cps1,Crh…
GO Biological Process	GO:0006650	glycerophospholipid metabolic process	317	0.118	1	1	3.38	0.593	2	64	0.0444	0.0313	2	32	129	unnamed,unnamed	unnamed,unnamed,unnamed,unnamed,unnamed,unnamed,unnamed,unnamed,unnamed,unnamed,unnamed,unnamed,unnamed,unnamed,unnamed,unnamed,unnamed,unnamed,unnamed,unnamed,unnamed,unnamed,unnamed,unnamed,unnamed,unnamed,unnamed,unnamed,unnamed,unnamed,unnamed,unnamed,unnamed,unnamed,unnamed,unnamed,unnamed,unnamed,unnamed,unnamed,unnamed,unnamed,unnamed,unnamed,unnamed,unnamed,unnamed,unnamed,unnamed,unnamed…	Cwh43,Pik3c2b	Abhd5,Aldh5a1,Apoa1,Cdipt,Chka,Cwh43,Dpm1,Drd2,Fabp3,Galr2,Htr2a,Ip6k2,Mtm1,Pcyt1a,Pcyt1b,Pgap2,Pigg,Pigm,Pign,Pigo,Pigs,Pik3c2b,Pik3c3,Pik3ca,Pik3cd,Pip4k2a,Pla2g1b,Plcb1,Plch2,Pon1,Slc27a1,Synj2
GO Biological Process	GO:0065007	biological regulation	318	0.122	1	1	1.15	28.8	33	3108	0.733	0.0106	33	1601	8990	unnamed,unnamed,unnamed,unnamed,unnamed,unnamed,unnamed,unnamed,unnamed,unnamed,unnamed,unnamed,unnamed,unnamed,unnamed,unnamed,unnamed,unnamed,unnamed,unnamed,unnamed,unnamed,unnamed,unnamed,unnamed,unnamed,unnamed,unnamed,unnamed,unnamed,unnamed,unnamed,unnamed	unnamed,unnamed,unnamed,unnamed,unnamed,unnamed,unnamed,unnamed,unnamed,unnamed,unnamed,unnamed,unnamed,unnamed,unnamed,unnamed,unnamed,unnamed,unnamed,unnamed,unnamed,unnamed,unnamed,unnamed,unnamed,unnamed,unnamed,unnamed,unnamed,unnamed,unnamed,unnamed,unnamed,unnamed,unnamed,unnamed,unnamed,unnamed,unnamed,unnamed,unnamed,unnamed,unnamed,unnamed,unnamed,unnamed,unnamed,unnamed,unnamed,unnamed…	Brca1,Cd7,Chfr,Cplx1,Cspg5,Dach1,Dusp1,Ell3,Gabra2,Gabrg1,Gfap,Gipc1,Hspa1b,Il31ra,Il6st,Limk1,Mafg,March5,Mdm4,Nefl,Nefm,Olfr119,Olfr120,Pdia3,Pik3c2b,Rnd2,S100b,Scand1,Sncb,Tipin,Tnfrsf11a,Txnrd2,Zfp605	1500010J02Rik,1500015O10Rik,2410022L05Rik,2810002N01Rik,2810021J22Rik,4632434I11Rik,4921515J06Rik,4930447C04Rik,4930449I24Rik,4930596D02Rik,4933426I21Rik,A1cf,A930001N09Rik,AK011498,AK028549,Aarsd1,Abcb5,Abcb7,Abcg1,Abcg4,Abhd2,Abhd5,Abhd6,Ablim1,Acan,Acr,Actr3b,Acvr1b,Adam17,Adam19,Adam23,Adam33,Adam8,Adamts19,Adamts3,Adap1,Adar,Adcy5,Adcy9,Add2,Adipor1,Adnp2,Adra1d,Adrb1,Adrbk1,Aes,Afap1,Afap1l…
GO Biological Process	GO:0032940	secretion by cell	319	0.122	1	1	2.45	1.22	3	132	0.0667	0.0227	2	57	235	unnamed,unnamed,unnamed	unnamed,unnamed,unnamed,unnamed,unnamed,unnamed,unnamed,unnamed,unnamed,unnamed,unnamed,unnamed,unnamed,unnamed,unnamed,unnamed,unnamed,unnamed,unnamed,unnamed,unnamed,unnamed,unnamed,unnamed,unnamed,unnamed,unnamed,unnamed,unnamed,unnamed,unnamed,unnamed,unnamed,unnamed,unnamed,unnamed,unnamed,unnamed,unnamed,unnamed,unnamed,unnamed,unnamed,unnamed,unnamed,unnamed,unnamed,unnamed,unnamed,unnamed…	Cplx1,Gipc1	1500003O03Rik,Acr,Apba1,Arfgap3,Brsk1,Cacna1b,Cplx1,Cplx2,Ctgf,Dio2,Exoc4,Exoc5,Exoc6b,Exoc7,Exoc8,Gipc1,Glra1,Glrb,Gnptab,Htt,Lat,Lax1,Lep,Lgi3,Lin7a,Lin7b,Llgl1,Ly6e,Lyn,Lyst,Mafa,Meg3,Ntrk2,Pclo,Pou2f2,Ppfia3,Psen1,Rala,Rapgef4,Rims1,Rims2,Rims3,Scamp1,Scrn1,Slc17a9,Slc18a2,Smad2,Smpd3,Snap25,Stx4a,Stxbp5l,Tnfsf13b,Trim36,Unc13a,Vgf,Vps33a,Ywhaz
GO Biological Process	GO:0044030	regulation of DNA methylation	320	0.122	1	1	7.71	0.13	1	14	0.0222	0.0714	1	4	7	unnamed	unnamed,unnamed,unnamed,unnamed,unnamed,unnamed,unnamed,unnamed,unnamed,unnamed,unnamed,unnamed,unnamed,unnamed	Brca1	Brca1,Dnmt3a,Meg3,Pik3ca
GO Biological Process	GO:0051580	regulation of neurotransmitter uptake	320	0.122	1	1	7.71	0.13	1	14	0.0222	0.0714	1	5	7	unnamed	unnamed,unnamed,unnamed,unnamed,unnamed,unnamed,unnamed,unnamed,unnamed,unnamed,unnamed,unnamed,unnamed,unnamed	Gfap	Drd2,Gfap,Nat8l,Nos1,Slc18a1
GO Biological Process	GO:0032784	regulation of transcription elongation, DNA-dependent	320	0.122	1	1	7.71	0.13	1	14	0.0222	0.0714	1	6	18	unnamed	unnamed,unnamed,unnamed,unnamed,unnamed,unnamed,unnamed,unnamed,unnamed,unnamed,unnamed,unnamed,unnamed,unnamed	Ell3	Brd4,Eapp,Ell3,Ldb1,Supt6h,Tcea3
GO Biological Process	GO:0007585	respiratory gaseous exchange	320	0.122	1	1	7.71	0.13	1	14	0.0222	0.0714	1	11	28	unnamed	unnamed,unnamed,unnamed,unnamed,unnamed,unnamed,unnamed,unnamed,unnamed,unnamed,unnamed,unnamed,unnamed,unnamed	Dach1	Chst11,Dach1,Grin1,Jag2,Mafb,Man1a2,Ndn,Ndst1,Pbx3,Traf4,Zfand5
GO Biological Process	GO:0014911	positive regulation of smooth muscle cell migration	320	0.122	1	1	7.71	0.13	1	14	0.0222	0.0714	1	4	14	unnamed	unnamed,unnamed,unnamed,unnamed,unnamed,unnamed,unnamed,unnamed,unnamed,unnamed,unnamed,unnamed,unnamed,unnamed	Il6st	Bcl2,Il6st,Rapgef4,Rps6kb1
GO Biological Process	GO:0019725	cellular homeostasis	325	0.124	1	1	1.88	2.66	5	287	0.111	0.0174	5	127	512	unnamed,unnamed,unnamed,unnamed,unnamed	unnamed,unnamed,unnamed,unnamed,unnamed,unnamed,unnamed,unnamed,unnamed,unnamed,unnamed,unnamed,unnamed,unnamed,unnamed,unnamed,unnamed,unnamed,unnamed,unnamed,unnamed,unnamed,unnamed,unnamed,unnamed,unnamed,unnamed,unnamed,unnamed,unnamed,unnamed,unnamed,unnamed,unnamed,unnamed,unnamed,unnamed,unnamed,unnamed,unnamed,unnamed,unnamed,unnamed,unnamed,unnamed,unnamed,unnamed,unnamed,unnamed,unnamed…	Il6st,Mafg,Pdia3,S100b,Txnrd2	Abcb5,Abcb7,Adrb1,Afg3l2,Aifm3,Apc,App,Aqp11,Arf1,Atp2a2,Atp6v0c,Atxn1,Bcl2,Bnip3,Cacng2,Calca,Ccdc109a,Cherp,Chrna7,Cldn11,Clns1a,Clstn1,Cntn2,Cul5,Cx3cl1,Cxcl13,Cyp7a1,Dag1,Dld,Dnajc16,Drd2,Efhc1,Egr2,Erp44,Fasl,Fgfr3,Fitm2,Fkbp1a,Fyn,Galr2,Gclc,Ghrl,Glra1,Glrb,Glrx3,Gnaq,Grik2,Grin1,Grin2a,Grin2b,Grin2c,Haao,Hcrt,Hes5,Htr2a,Htt,Id4,Il6st,Ireb2,Itgav,Itgb1,Jph2,Kcna5,Kcnj11,Kcnma1,Kcnmb3,Kcnmb4…
GO Biological Process	GO:0051384	response to glucocorticoid stimulus	326	0.124	1	1	3.27	0.611	2	66	0.0444	0.0303	2	27	144	unnamed,unnamed	unnamed,unnamed,unnamed,unnamed,unnamed,unnamed,unnamed,unnamed,unnamed,unnamed,unnamed,unnamed,unnamed,unnamed,unnamed,unnamed,unnamed,unnamed,unnamed,unnamed,unnamed,unnamed,unnamed,unnamed,unnamed,unnamed,unnamed,unnamed,unnamed,unnamed,unnamed,unnamed,unnamed,unnamed,unnamed,unnamed,unnamed,unnamed,unnamed,unnamed,unnamed,unnamed,unnamed,unnamed,unnamed,unnamed,unnamed,unnamed,unnamed,unnamed…	Dusp1,Nefl	Ahr,Bcl2,Bdh1,Ccnd1,Cps1,Dusp1,Got1,Gpr83,Gstp1,Hmbs,Junb,Nefl,Ntrk3,Pdcd7,Pebp1,Pfkfb1,Ppargc1b,Prkca,Ptgs1,Rps6kb1,Sdc1,Slc18a2,Slit2,Slit3,Sult1a1,Trh,Ucn
GO Biological Process	GO:0006508	proteolysis	327	0.125	1	1	1.75	3.44	6	371	0.133	0.0162	2	152	797	unnamed,unnamed,unnamed,unnamed,unnamed,unnamed	unnamed,unnamed,unnamed,unnamed,unnamed,unnamed,unnamed,unnamed,unnamed,unnamed,unnamed,unnamed,unnamed,unnamed,unnamed,unnamed,unnamed,unnamed,unnamed,unnamed,unnamed,unnamed,unnamed,unnamed,unnamed,unnamed,unnamed,unnamed,unnamed,unnamed,unnamed,unnamed,unnamed,unnamed,unnamed,unnamed,unnamed,unnamed,unnamed,unnamed,unnamed,unnamed,unnamed,unnamed,unnamed,unnamed,unnamed,unnamed,unnamed,unnamed…	Chfr,Ide	1500015O10Rik,2700078E11Rik,4930444G20Rik,AF366264,AI314180,Abhd5,Acr,Adam17,Adam19,Adam23,Adam33,Adam8,Adamts19,Adamts3,Adamts4,Afg3l1,Afg3l2,Agtpbp1,Amz1,Arih1,Arrb1,Atg4b,Atxn3,Btrc,Capn1,Capn6,Cd46,Chfr,Cntnap5a,Cops5,Cpxm2,Ctsc,Cul1,Cul3,Cul4b,Cul5,Cul7,Cyld,Ddi1,Dld,Dnajb9,Dnajc3,Dpp3,Dpp8,Edem1,Edem3,Erap1,Erlec1,Erlin2,Fbxl12,Fbxo2,Fbxo31,Fbxw11,Gm5136,Hace1,Hecw2,Hgf,Htra1,Ide,Immp2l,Jka…
GO Biological Process	GO:0045595	regulation of cell differentiation	328	0.127	1	1	1.65	4.25	7	459	0.156	0.0153	6	192	823	unnamed,unnamed,unnamed,unnamed,unnamed,unnamed,unnamed	unnamed,unnamed,unnamed,unnamed,unnamed,unnamed,unnamed,unnamed,unnamed,unnamed,unnamed,unnamed,unnamed,unnamed,unnamed,unnamed,unnamed,unnamed,unnamed,unnamed,unnamed,unnamed,unnamed,unnamed,unnamed,unnamed,unnamed,unnamed,unnamed,unnamed,unnamed,unnamed,unnamed,unnamed,unnamed,unnamed,unnamed,unnamed,unnamed,unnamed,unnamed,unnamed,unnamed,unnamed,unnamed,unnamed,unnamed,unnamed,unnamed,unnamed…	Gfap,Il6st,Limk1,Mafg,Nefl,Nefm	AK028549,Abcg1,Adam8,Adrb1,Apc,Apold1,App,Ar,Arf6,Arhgef2,Aspm,Atf1,Atoh1,Axin2,Bcl2,Bhlhe23,Bmp7,Bmpr1a,Bmpr1b,Bmpr2,Ccnd1,Ccnd2,Cd276,Cd83,Cdh4,Cdk5r1,Cdk5rap2,Cdon,Chn1,Cit,Cntn2,Cntn4,Crebbp,Ctnnb1,Cul7,Cyp26b1,Cyp27b1,Cyr61,D130043K22Rik,Drd2,Efna1,Epb4.1l5,Esrrb,Etv5,Fez1,Fgf18,Fgf9,Fgfr3,Foxf1a,Foxo4,Frzb,Fzd1,Gdf11,Gfap,Glg1,Gm614,Gnaq,Grin1,Grm5,Hdac4,Hes1,Hes5,Heyl,Hist1h4i,Hook3,Hoxa7,…
GO Biological Process	GO:0044260	cellular macromolecule metabolic process	329	0.127	1	1	1.23	18.7	23	2024	0.511	0.0114	19	993	4787	unnamed,unnamed,unnamed,unnamed,unnamed,unnamed,unnamed,unnamed,unnamed,unnamed,unnamed,unnamed,unnamed,unnamed,unnamed,unnamed,unnamed,unnamed,unnamed,unnamed,unnamed,unnamed,unnamed	unnamed,unnamed,unnamed,unnamed,unnamed,unnamed,unnamed,unnamed,unnamed,unnamed,unnamed,unnamed,unnamed,unnamed,unnamed,unnamed,unnamed,unnamed,unnamed,unnamed,unnamed,unnamed,unnamed,unnamed,unnamed,unnamed,unnamed,unnamed,unnamed,unnamed,unnamed,unnamed,unnamed,unnamed,unnamed,unnamed,unnamed,unnamed,unnamed,unnamed,unnamed,unnamed,unnamed,unnamed,unnamed,unnamed,unnamed,unnamed,unnamed,unnamed…	Brca1,Chfr,Cwh43,Dach1,Dis3l,Dnajb1,Dusp1,Eif4h,Ell3,Gak,Hipk4,Hspa1b,Ide,Il6st,Limk1,Mafg,March5,Thoc3,Tipin	1500010J02Rik,1500015O10Rik,2310003H01Rik,2410022L05Rik,2510012J08Rik,2610101N10Rik,2700078E11Rik,4921515J06Rik,A1cf,AI314180,AK028549,Aarsd1,Abcg1,Acan,Acr,Acvr1b,Adad2,Adam8,Adar,Adat1,Adat2,Adnp2,Adrb1,Adrbk1,Aes,Aff2,Aff3,Agtpbp1,Ahr,Ahsa1,Akt2,Akt3,Alkbh2,Alkbh3,Alkbh8,Alpk2,Anapc1,Anapc16,Anapc7,Ankk1,Anp32a,Aoah,Apoa1,Apold1,Apom,App,Ar,Arhgap22,Arid5b,Arih1,Arnt2,Arrb1,Ascc2,Asphd1,Asphd2…
GO Biological Process	GO:0030099	myeloid cell differentiation	330	0.127	1	1	3.22	0.62	2	67	0.0444	0.0299	2	24	130	unnamed,unnamed	unnamed,unnamed,unnamed,unnamed,unnamed,unnamed,unnamed,unnamed,unnamed,unnamed,unnamed,unnamed,unnamed,unnamed,unnamed,unnamed,unnamed,unnamed,unnamed,unnamed,unnamed,unnamed,unnamed,unnamed,unnamed,unnamed,unnamed,unnamed,unnamed,unnamed,unnamed,unnamed,unnamed,unnamed,unnamed,unnamed,unnamed,unnamed,unnamed,unnamed,unnamed,unnamed,unnamed,unnamed,unnamed,unnamed,unnamed,unnamed,unnamed,unnamed…	Il31ra,Tnfrsf11a	Camk4,Ctnnb1,Epas1,Gab2,Hcls1,Il31ra,Ireb2,Junb,Ldb1,Lyn,Mb,Mll5,Plcb1,Prkx,Psen1,Rcor1,Tesc,Tgfbr2,Thoc5,Tm7sf4,Tnfrsf11a,Tnfsf11,Vegfa,Vps33a
GO Biological Process	GO:0042127	regulation of cell proliferation	331	0.13	1	1	1.64	4.28	7	462	0.156	0.0152	8	180	894	unnamed,unnamed,unnamed,unnamed,unnamed,unnamed,unnamed	unnamed,unnamed,unnamed,unnamed,unnamed,unnamed,unnamed,unnamed,unnamed,unnamed,unnamed,unnamed,unnamed,unnamed,unnamed,unnamed,unnamed,unnamed,unnamed,unnamed,unnamed,unnamed,unnamed,unnamed,unnamed,unnamed,unnamed,unnamed,unnamed,unnamed,unnamed,unnamed,unnamed,unnamed,unnamed,unnamed,unnamed,unnamed,unnamed,unnamed,unnamed,unnamed,unnamed,unnamed,unnamed,unnamed,unnamed,unnamed,unnamed,unnamed…	Dach1,Gfap,Hspa1b,Il31ra,Il6st,Mafg,Mdm4,Tipin	AK028549,Adam17,Adam33,Agap2,Ahr,Apc,Ar,Arhgap5,Arnt2,Atf3,Atm,Axin2,B4galt7,BC096441,Bcl2,Bmp7,Bmpr1a,Bmpr2,Cblb,Ccnd1,Ccnd2,Cd276,Cd80,Cdca7l,Cdkn1b,Cdon,Cherp,Chst11,Ctgf,Ctnnb1,Cx3cl1,Cyp27b1,Cyp7b1,Cyr61,Dab2ip,Dach1,Dlg1,Dpt,Drd2,E2f1,E2f3,E2f7,Eapp,Eid2,Epcam,Etv4,Etv5,Fasl,Fgf18,Fgf9,Fgfr3,Fktn,Fnta,Foxe3,Foxf1a,Foxo4,Frs2,Frzb,Gab2,Gabbr1,Gdf11,Gfap,Ghrl,Grpr,Gstp1,Gtpbp4,Hcls1,Hdac4,Hes…
GO Biological Process	GO:0006401	RNA catabolic process	332	0.13	1	1	3.18	0.63	2	68	0.0444	0.0294	2	23	76	unnamed,unnamed	unnamed,unnamed,unnamed,unnamed,unnamed,unnamed,unnamed,unnamed,unnamed,unnamed,unnamed,unnamed,unnamed,unnamed,unnamed,unnamed,unnamed,unnamed,unnamed,unnamed,unnamed,unnamed,unnamed,unnamed,unnamed,unnamed,unnamed,unnamed,unnamed,unnamed,unnamed,unnamed,unnamed,unnamed,unnamed,unnamed,unnamed,unnamed,unnamed,unnamed,unnamed,unnamed,unnamed,unnamed,unnamed,unnamed,unnamed,unnamed,unnamed,unnamed…	Dis3l,Hspa1b	Atm,C77370,Dcp1b,Dcp2,Dis3l,Drosha,Eif2c1,Eif2c3,Hspa1b,Isg20,Lsm1,Mlh1,Nanos2,Ncbp2,Nit1,Pabpc1,Parn,Rc3h1,Rnaseh2c,Smg5,Supv3l1,Upf3b,Wibg
GO Biological Process	GO:0010817	regulation of hormone levels	332	0.13	1	1	3.18	0.63	2	68	0.0444	0.0294	1	30	171	unnamed,unnamed	unnamed,unnamed,unnamed,unnamed,unnamed,unnamed,unnamed,unnamed,unnamed,unnamed,unnamed,unnamed,unnamed,unnamed,unnamed,unnamed,unnamed,unnamed,unnamed,unnamed,unnamed,unnamed,unnamed,unnamed,unnamed,unnamed,unnamed,unnamed,unnamed,unnamed,unnamed,unnamed,unnamed,unnamed,unnamed,unnamed,unnamed,unnamed,unnamed,unnamed,unnamed,unnamed,unnamed,unnamed,unnamed,unnamed,unnamed,unnamed,unnamed,unnamed…	Cplx1	Apoa1,Bbs1,Bmpr1b,Cplx1,Crh,Cyp26b1,Cyp26c1,Dio2,Foxe3,Hsd17b11,Htt,Lep,Ly6e,Lyn,Mafa,Meg3,Pclo,Pcsk1n,Plekha1,Prlhr,Rapgef4,Rims2,Slc18a2,Smad2,Smpd3,Snap25,Sult1a1,Vgf,Ywhah,Ywhaz
GO Biological Process	GO:0006260	DNA replication	332	0.13	1	1	3.18	0.63	2	68	0.0444	0.0294	2	24	152	unnamed,unnamed	unnamed,unnamed,unnamed,unnamed,unnamed,unnamed,unnamed,unnamed,unnamed,unnamed,unnamed,unnamed,unnamed,unnamed,unnamed,unnamed,unnamed,unnamed,unnamed,unnamed,unnamed,unnamed,unnamed,unnamed,unnamed,unnamed,unnamed,unnamed,unnamed,unnamed,unnamed,unnamed,unnamed,unnamed,unnamed,unnamed,unnamed,unnamed,unnamed,unnamed,unnamed,unnamed,unnamed,unnamed,unnamed,unnamed,unnamed,unnamed,unnamed,unnamed…	Brca1,Tipin	Brca1,C77370,Cdc6,Cinp,Ctgf,Glrb,Mcm10,Mcm7,Nfib,Orc2,Pinx1,Polb,Polh,Poll,Polq,Pura,Purb,Rbms1,Rev1,Rev3l,Rrm1,Tipin,Tonsl,Top1
GO Biological Process	GO:0035066	positive regulation of histone acetylation	335	0.13	1	1	7.2	0.139	1	15	0.0222	0.0667	1	5	11	unnamed	unnamed,unnamed,unnamed,unnamed,unnamed,unnamed,unnamed,unnamed,unnamed,unnamed,unnamed,unnamed,unnamed,unnamed,unnamed	Brca1	Arrb1,Brca1,Nos1,Paxip1,Rps6ka5
GO Biological Process	GO:0042531	positive regulation of tyrosine phosphorylation of STAT protein	335	0.13	1	1	7.2	0.139	1	15	0.0222	0.0667	2	9	33	unnamed	unnamed,unnamed,unnamed,unnamed,unnamed,unnamed,unnamed,unnamed,unnamed,unnamed,unnamed,unnamed,unnamed,unnamed,unnamed	Il31ra,Il6st	Arl2bp,Fgfr3,Hcls1,Hes1,Hes5,Il31ra,Il6st,Lep,Lyn
GO Biological Process	GO:0045861	negative regulation of proteolysis	335	0.13	1	1	7.2	0.139	1	15	0.0222	0.0667	1	5	26	unnamed	unnamed,unnamed,unnamed,unnamed,unnamed,unnamed,unnamed,unnamed,unnamed,unnamed,unnamed,unnamed,unnamed,unnamed,unnamed	Gipc1	Gipc1,N4bp1,Ptpn3,Timp3,Usp44
GO Biological Process	GO:2000758	positive regulation of peptidyl-lysine acetylation	335	0.13	1	1	7.2	0.139	1	15	0.0222	0.0667	1	5	12	unnamed	unnamed,unnamed,unnamed,unnamed,unnamed,unnamed,unnamed,unnamed,unnamed,unnamed,unnamed,unnamed,unnamed,unnamed,unnamed	Brca1	Arrb1,Brca1,Nos1,Paxip1,Rps6ka5
GO Biological Process	GO:0048015	phosphatidylinositol-mediated signaling	335	0.13	1	1	7.2	0.139	1	15	0.0222	0.0667	1	8	35	unnamed	unnamed,unnamed,unnamed,unnamed,unnamed,unnamed,unnamed,unnamed,unnamed,unnamed,unnamed,unnamed,unnamed,unnamed,unnamed	Pik3c2b	Gab2,Htr2a,Ncs1,Pik3c2b,Pik3c3,Pik3ca,Pik3cd,Plekha1
GO Biological Process	GO:0032370	positive regulation of lipid transport	335	0.13	1	1	7.2	0.139	1	15	0.0222	0.0667	1	6	20	unnamed	unnamed,unnamed,unnamed,unnamed,unnamed,unnamed,unnamed,unnamed,unnamed,unnamed,unnamed,unnamed,unnamed,unnamed,unnamed	Tnfrsf11a	Abcg1,Abcg4,Nfkbia,Pon1,Tnfrsf11a,Tnfsf11
GO Biological Process	GO:0022415	viral reproductive process	335	0.13	1	1	7.2	0.139	1	15	0.0222	0.0667	1	6	44	unnamed	unnamed,unnamed,unnamed,unnamed,unnamed,unnamed,unnamed,unnamed,unnamed,unnamed,unnamed,unnamed,unnamed,unnamed,unnamed	Thoc3	Bcl2l11,Ntrk3,Rraga,Thoc3,Thoc5,Vapb
GO Biological Process	GO:0030641	regulation of cellular pH	335	0.13	1	1	7.2	0.139	1	15	0.0222	0.0667	1	5	18	unnamed	unnamed,unnamed,unnamed,unnamed,unnamed,unnamed,unnamed,unnamed,unnamed,unnamed,unnamed,unnamed,unnamed,unnamed,unnamed	Mafg	Aqp11,Atp6v0c,Fasl,Mafg,Slc4a3
GO Biological Process	GO:0006405	RNA export from nucleus	335	0.13	1	1	7.2	0.139	1	15	0.0222	0.0667	1	7	30	unnamed	unnamed,unnamed,unnamed,unnamed,unnamed,unnamed,unnamed,unnamed,unnamed,unnamed,unnamed,unnamed,unnamed,unnamed,unnamed	Thoc3	Ddx25,Gle1,Ncbp2,Nup107,Rpsa,Thoc3,Thoc5
GO Biological Process	GO:0002675	positive regulation of acute inflammatory response	335	0.13	1	1	7.2	0.139	1	15	0.0222	0.0667	1	4	22	unnamed	unnamed,unnamed,unnamed,unnamed,unnamed,unnamed,unnamed,unnamed,unnamed,unnamed,unnamed,unnamed,unnamed,unnamed,unnamed	Tnfrsf11a	Adam8,Tac1,Tnfrsf11a,Tnfsf11
GO Biological Process	GO:0019048	virus-host interaction	335	0.13	1	1	7.2	0.139	1	15	0.0222	0.0667	1	6	21	unnamed	unnamed,unnamed,unnamed,unnamed,unnamed,unnamed,unnamed,unnamed,unnamed,unnamed,unnamed,unnamed,unnamed,unnamed,unnamed	Thoc3	Bcl2l11,Ntrk3,Rraga,Thoc3,Thoc5,Vapb
GO Biological Process	GO:0010977	negative regulation of neuron projection development	335	0.13	1	1	7.2	0.139	1	15	0.0222	0.0667	1	8	24	unnamed	unnamed,unnamed,unnamed,unnamed,unnamed,unnamed,unnamed,unnamed,unnamed,unnamed,unnamed,unnamed,unnamed,unnamed,unnamed	Gfap	D130043K22Rik,Gfap,Itm2c,Ntm,Pmp22,Spp1,Stmn2,Tnr
GO Biological Process	GO:0010942	positive regulation of cell death	347	0.136	1	1	2.01	1.99	4	215	0.0889	0.0186	4	97	421	unnamed,unnamed,unnamed,unnamed	unnamed,unnamed,unnamed,unnamed,unnamed,unnamed,unnamed,unnamed,unnamed,unnamed,unnamed,unnamed,unnamed,unnamed,unnamed,unnamed,unnamed,unnamed,unnamed,unnamed,unnamed,unnamed,unnamed,unnamed,unnamed,unnamed,unnamed,unnamed,unnamed,unnamed,unnamed,unnamed,unnamed,unnamed,unnamed,unnamed,unnamed,unnamed,unnamed,unnamed,unnamed,unnamed,unnamed,unnamed,unnamed,unnamed,unnamed,unnamed,unnamed,unnamed…	Brca1,Dusp1,Pdia3,S100b	2810002N01Rik,Adam8,Aifm3,Apbb2,Apc,App,Atm,Axin2,B230120H23Rik,Bag1,Bcl10,Bcl2l11,Bmp7,Bnip1,Bnip3,Brca1,C6,Cdk5r1,Cdkn1b,Crh,Csrnp3,Ctgf,Ctnnb1,Dab2ip,Dedd2,Diablo,Dusp1,Dyrk2,Efhc1,Ercc3,Ern1,Fasl,Fgfr3,Frzb,Gch1,Grin2a,Grin2b,Hspd1,Ikbke,Ip6k2,Irf1,Itgb1,Itm2c,Jmy,Khdc1b,Klf11,Lrp6,Lyst,Mal,Map2k6,Map3k5,Map3k9,Mapk8,Mapk9,Mlh1,Mllt11,Msh2,Nacc1,Naif1,Ndufa13,Nell1,Nlrp1a,Nod1,Notch2,Pawr,Pdc…
GO Biological Process	GO:0048545	response to steroid hormone stimulus	348	0.137	1	1	2.33	1.29	3	139	0.0667	0.0216	3	65	351	unnamed,unnamed,unnamed	unnamed,unnamed,unnamed,unnamed,unnamed,unnamed,unnamed,unnamed,unnamed,unnamed,unnamed,unnamed,unnamed,unnamed,unnamed,unnamed,unnamed,unnamed,unnamed,unnamed,unnamed,unnamed,unnamed,unnamed,unnamed,unnamed,unnamed,unnamed,unnamed,unnamed,unnamed,unnamed,unnamed,unnamed,unnamed,unnamed,unnamed,unnamed,unnamed,unnamed,unnamed,unnamed,unnamed,unnamed,unnamed,unnamed,unnamed,unnamed,unnamed,unnamed…	Brca1,Dusp1,Nefl	Acr,Ahr,Ar,Arnt2,Bcl2,Bdh1,Bmp7,Brca1,Ccnd1,Ccnd2,Cps1,Ctgf,Ctnnb1,Cyp27b1,Dusp1,Esrrb,Ghrl,Got1,Gpr83,Grik4,Gstp1,Hmbs,Htr1b,Junb,Kcnj11,Lox,Mmp13,Mmp15,Mtap1b,Naip1,Ncoa1,Nefl,Nkx2-5,Nr1d2,Nr3c2,Nr5a2,Nrf1,Ntm,Ntrk3,Pdcd7,Pebp1,Pfkfb1,Pgr,Ppargc1b,Prdm2,Prkca,Ptgs1,Rora,Rps6kb1,Sdc1,Slc18a2,Slc25a36,Slit2,Slit3,Spp1,Sult1a1,Tbl1x,Tgfb2,Thrb,Timp3,Trh,Tspo,Ucn,Ucp1,Uts2
GO Biological Process	GO:0042509	regulation of tyrosine phosphorylation of STAT protein	349	0.138	1	1	6.75	0.148	1	16	0.0222	0.0625	2	10	41	unnamed	unnamed,unnamed,unnamed,unnamed,unnamed,unnamed,unnamed,unnamed,unnamed,unnamed,unnamed,unnamed,unnamed,unnamed,unnamed,unnamed	Il31ra,Il6st	Arl2bp,Fgfr3,Hcls1,Hes1,Hes5,Il31ra,Il6st,Irf1,Lep,Lyn
GO Biological Process	GO:0060749	mammary gland alveolus development	349	0.138	1	1	6.75	0.148	1	16	0.0222	0.0625	1	7	17	unnamed	unnamed,unnamed,unnamed,unnamed,unnamed,unnamed,unnamed,unnamed,unnamed,unnamed,unnamed,unnamed,unnamed,unnamed,unnamed,unnamed	Tnfrsf11a	Agap2,Ar,Ccnd1,Foxf1a,Tnfrsf11a,Tnfsf11,Vegfa
GO Biological Process	GO:0030004	cellular monovalent inorganic cation homeostasis	349	0.138	1	1	6.75	0.148	1	16	0.0222	0.0625	1	6	22	unnamed	unnamed,unnamed,unnamed,unnamed,unnamed,unnamed,unnamed,unnamed,unnamed,unnamed,unnamed,unnamed,unnamed,unnamed,unnamed,unnamed	Mafg	Aqp11,Atp6v0c,Fasl,Mafg,Nr3c2,Slc4a3
GO Biological Process	GO:0008088	axon cargo transport	349	0.138	1	1	6.75	0.148	1	16	0.0222	0.0625	1	5	14	unnamed	unnamed,unnamed,unnamed,unnamed,unnamed,unnamed,unnamed,unnamed,unnamed,unnamed,unnamed,unnamed,unnamed,unnamed,unnamed,unnamed	Nefm	App,Htt,Klc1,Nefm,Ugt8a
GO Biological Process	GO:0007259	JAK-STAT cascade	349	0.138	1	1	6.75	0.148	1	16	0.0222	0.0625	2	6	26	unnamed	unnamed,unnamed,unnamed,unnamed,unnamed,unnamed,unnamed,unnamed,unnamed,unnamed,unnamed,unnamed,unnamed,unnamed,unnamed,unnamed	Il31ra,Il6st	Hes1,Il31ra,Il6st,Lep,Pkd2,Ptk6
GO Biological Process	GO:0042176	regulation of protein catabolic process	354	0.14	1	1	3.04	0.657	2	71	0.0444	0.0282	2	31	118	unnamed,unnamed	unnamed,unnamed,unnamed,unnamed,unnamed,unnamed,unnamed,unnamed,unnamed,unnamed,unnamed,unnamed,unnamed,unnamed,unnamed,unnamed,unnamed,unnamed,unnamed,unnamed,unnamed,unnamed,unnamed,unnamed,unnamed,unnamed,unnamed,unnamed,unnamed,unnamed,unnamed,unnamed,unnamed,unnamed,unnamed,unnamed,unnamed,unnamed,unnamed,unnamed,unnamed,unnamed,unnamed,unnamed,unnamed,unnamed,unnamed,unnamed,unnamed,unnamed…	Gipc1,Mdm4	Adam8,Apc,Atg4b,Btrc,Cblb,Cdkn1b,Cul4b,Dyx1c1,Fyn,Gclc,Gipc1,Grin2a,Grin2c,Mdm4,N4bp1,Ndfip1,Nub1,Ppp2ca,Psen1,Ptpn3,Rad23b,Rchy1,Sgsm3,Smad4,Stub1,Timp3,Trib2,Trim32,Uchl5,Usp44,Vcp
GO Biological Process	GO:0031960	response to corticosteroid stimulus	354	0.14	1	1	3.04	0.657	2	71	0.0444	0.0282	2	30	152	unnamed,unnamed	unnamed,unnamed,unnamed,unnamed,unnamed,unnamed,unnamed,unnamed,unnamed,unnamed,unnamed,unnamed,unnamed,unnamed,unnamed,unnamed,unnamed,unnamed,unnamed,unnamed,unnamed,unnamed,unnamed,unnamed,unnamed,unnamed,unnamed,unnamed,unnamed,unnamed,unnamed,unnamed,unnamed,unnamed,unnamed,unnamed,unnamed,unnamed,unnamed,unnamed,unnamed,unnamed,unnamed,unnamed,unnamed,unnamed,unnamed,unnamed,unnamed,unnamed…	Dusp1,Nefl	Ahr,Bcl2,Bdh1,Ccnd1,Cps1,Ctgf,Dusp1,Got1,Gpr83,Grik4,Gstp1,Hmbs,Htr1b,Junb,Nefl,Ntrk3,Pdcd7,Pebp1,Pfkfb1,Ppargc1b,Prkca,Ptgs1,Rps6kb1,Sdc1,Slc18a2,Slit2,Slit3,Sult1a1,Trh,Ucn
GO Biological Process	GO:0051726	regulation of cell cycle	356	0.142	1	1	1.8	2.78	5	300	0.111	0.0167	4	121	500	unnamed,unnamed,unnamed,unnamed,unnamed	unnamed,unnamed,unnamed,unnamed,unnamed,unnamed,unnamed,unnamed,unnamed,unnamed,unnamed,unnamed,unnamed,unnamed,unnamed,unnamed,unnamed,unnamed,unnamed,unnamed,unnamed,unnamed,unnamed,unnamed,unnamed,unnamed,unnamed,unnamed,unnamed,unnamed,unnamed,unnamed,unnamed,unnamed,unnamed,unnamed,unnamed,unnamed,unnamed,unnamed,unnamed,unnamed,unnamed,unnamed,unnamed,unnamed,unnamed,unnamed,unnamed,unnamed…	Brca1,Chfr,Mdm4,Tipin	1500015O10Rik,4632434I11Rik,Adam17,Afap1l2,Apbb2,Apc,App,Asns,Atm,Axin2,B230120H23Rik,Bcl2,Bcl2l11,Bcr,Bmp7,Brca1,Brd4,Brsk1,Btrc,C77370,Ccnd1,Ccnd2,Ccnh,Ccnk,Ccno,Ccnt1,Ccnt2,Ccny,Cdc6,Cdk5rap2,Cdkn1b,Chek1,Chfr,Chordc1,Clock,Cops5,Crebbp,Csnk2a2,Cspp1,Ctgf,Ctnnb1,Cul4b,Cyld,Cyp27b1,Dlg1,Dusp3,E2f1,Ercc3,Ern1,Esx1,Fbxo31,Fgfr3,Fnta,Foxo4,Gm5136,Gpr3,Gtpbp4,Hdac3,Hspa2,Hspa8,Ino80,Ints7,Itgb1,Jmy…
GO Biological Process	GO:0055080	cation homeostasis	357	0.145	1	1	2.27	1.32	3	143	0.0667	0.021	3	66	305	unnamed,unnamed,unnamed	unnamed,unnamed,unnamed,unnamed,unnamed,unnamed,unnamed,unnamed,unnamed,unnamed,unnamed,unnamed,unnamed,unnamed,unnamed,unnamed,unnamed,unnamed,unnamed,unnamed,unnamed,unnamed,unnamed,unnamed,unnamed,unnamed,unnamed,unnamed,unnamed,unnamed,unnamed,unnamed,unnamed,unnamed,unnamed,unnamed,unnamed,unnamed,unnamed,unnamed,unnamed,unnamed,unnamed,unnamed,unnamed,unnamed,unnamed,unnamed,unnamed,unnamed…	Il6st,Mafg,S100b	Abcb7,App,Aqp11,Arf1,Atp2a2,Atp6v0c,Bcl2,Calca,Ccdc109a,Cherp,Clstn1,Cul5,Cxcl13,Cyp27b1,Drd2,Efhc1,Fasl,Fkbp1a,Galr2,Ghrl,Grik2,Grin1,Hcrt,Hrc,Htr2a,Htt,Il6st,Ireb2,Itgav,Itgb1,Jph2,Kcna5,Mafg,Mchr1,Mt1,Mt3,Ncaph2,Ndfip1,Ndn,Nr3c2,Pde6a,Pkd2,Plcg2,Pln,Prkca,Prkce,Psen1,Ryr2,Ryr3,S100b,Slc22a17,Slc24a3,Slc39a5,Slc4a3,Slc8a3,Slc9a6,Slc9a7,Slc9a9,Sod1,Stim2,Sv2a,Tac1,Tgfa,Tymp,Uts2,Wfs1
GO Biological Process	GO:0045767	regulation of anti-apoptosis	358	0.146	1	1	6.35	0.157	1	17	0.0222	0.0588	1	9	45	unnamed	unnamed,unnamed,unnamed,unnamed,unnamed,unnamed,unnamed,unnamed,unnamed,unnamed,unnamed,unnamed,unnamed,unnamed,unnamed,unnamed,unnamed	Dusp1	Arrb1,Ctnnb1,Dusp1,Lifr,Opa1,Pik3r2,Rasa1,Rnf144b,Serbp1
GO Biological Process	GO:0042035	regulation of cytokine biosynthetic process	358	0.146	1	1	6.35	0.157	1	17	0.0222	0.0588	1	11	83	unnamed	unnamed,unnamed,unnamed,unnamed,unnamed,unnamed,unnamed,unnamed,unnamed,unnamed,unnamed,unnamed,unnamed,unnamed,unnamed,unnamed,unnamed	S100b	Adam33,Bcl10,Cd276,Ghrl,Hspb1,Icosl,Irf1,S100b,Tlr1,Tnfrsf13c,Trib2
GO Biological Process	GO:2000756	regulation of peptidyl-lysine acetylation	358	0.146	1	1	6.35	0.157	1	17	0.0222	0.0588	1	6	22	unnamed	unnamed,unnamed,unnamed,unnamed,unnamed,unnamed,unnamed,unnamed,unnamed,unnamed,unnamed,unnamed,unnamed,unnamed,unnamed,unnamed,unnamed	Brca1	Arrb1,Brca1,Chek1,Nos1,Paxip1,Rps6ka5
GO Biological Process	GO:0046427	positive regulation of JAK-STAT cascade	358	0.146	1	1	6.35	0.157	1	17	0.0222	0.0588	2	10	41	unnamed	unnamed,unnamed,unnamed,unnamed,unnamed,unnamed,unnamed,unnamed,unnamed,unnamed,unnamed,unnamed,unnamed,unnamed,unnamed,unnamed,unnamed	Il31ra,Il6st	Agap2,Arl2bp,Fgfr3,Hcls1,Hes1,Hes5,Il31ra,Il6st,Lep,Lyn
GO Biological Process	GO:0035065	regulation of histone acetylation	358	0.146	1	1	6.35	0.157	1	17	0.0222	0.0588	1	6	21	unnamed	unnamed,unnamed,unnamed,unnamed,unnamed,unnamed,unnamed,unnamed,unnamed,unnamed,unnamed,unnamed,unnamed,unnamed,unnamed,unnamed,unnamed	Brca1	Arrb1,Brca1,Chek1,Nos1,Paxip1,Rps6ka5
GO Biological Process	GO:0033261	regulation of S phase	358	0.146	1	1	6.35	0.157	1	17	0.0222	0.0588	1	7	26	unnamed	unnamed,unnamed,unnamed,unnamed,unnamed,unnamed,unnamed,unnamed,unnamed,unnamed,unnamed,unnamed,unnamed,unnamed,unnamed,unnamed,unnamed	Tipin	Apbb2,Chek1,Crebbp,Cul4b,Ino80,Myo16,Tipin
GO Biological Process	GO:0002250	adaptive immune response	358	0.146	1	1	6.35	0.157	1	17	0.0222	0.0588	1	14	101	unnamed	unnamed,unnamed,unnamed,unnamed,unnamed,unnamed,unnamed,unnamed,unnamed,unnamed,unnamed,unnamed,unnamed,unnamed,unnamed,unnamed,unnamed	Tnfrsf11a	Adam17,BC096441,Bcl10,Dlg1,Hspd1,Icosl,Il18bp,Lyst,Mlh1,Msh2,Pou2f2,Serping1,Tnfrsf11a,Vegfa
GO Biological Process	GO:0051052	regulation of DNA metabolic process	365	0.149	1	1	2.92	0.685	2	74	0.0444	0.027	2	33	153	unnamed,unnamed	unnamed,unnamed,unnamed,unnamed,unnamed,unnamed,unnamed,unnamed,unnamed,unnamed,unnamed,unnamed,unnamed,unnamed,unnamed,unnamed,unnamed,unnamed,unnamed,unnamed,unnamed,unnamed,unnamed,unnamed,unnamed,unnamed,unnamed,unnamed,unnamed,unnamed,unnamed,unnamed,unnamed,unnamed,unnamed,unnamed,unnamed,unnamed,unnamed,unnamed,unnamed,unnamed,unnamed,unnamed,unnamed,unnamed,unnamed,unnamed,unnamed,unnamed…	Brca1,Tipin	1500010J02Rik,Atf1,Axin2,BC096441,Brca1,Chek1,Dnmt3a,Gm5136,Gtpbp4,Hcrt,Ino80,Kras,Meg3,Mlh1,Msh2,Ndfip1,Nppc,Paxip1,Pdgfa,Pds5a,Pik3ca,Pla2g1b,Ppp4r2,Rad18,Rnf168,Terf1,Tipin,Tnks,Tspyl2,Ube2b,Ube2n,Ucn,Wapal
GO Biological Process	GO:0043523	regulation of neuron apoptosis	365	0.149	1	1	2.92	0.685	2	74	0.0444	0.027	2	32	147	unnamed,unnamed	unnamed,unnamed,unnamed,unnamed,unnamed,unnamed,unnamed,unnamed,unnamed,unnamed,unnamed,unnamed,unnamed,unnamed,unnamed,unnamed,unnamed,unnamed,unnamed,unnamed,unnamed,unnamed,unnamed,unnamed,unnamed,unnamed,unnamed,unnamed,unnamed,unnamed,unnamed,unnamed,unnamed,unnamed,unnamed,unnamed,unnamed,unnamed,unnamed,unnamed,unnamed,unnamed,unnamed,unnamed,unnamed,unnamed,unnamed,unnamed,unnamed,unnamed…	Nefl,Sncb	Adam8,Atm,Bag1,Barhl1,Bcl2,Bcl2l11,Braf,Cdk5r1,Crh,Fasl,Gclc,Gclm,Grik2,Grin1,Hipk2,Htt,Msh2,Nefl,Ppargc1a,Psen1,Rasa1,Rhoa,Six1,Six4,Sncb,Sod1,Srpk2,Tgfa,Tgfb2,Ube2m,Ucn,Wfs1
GO Biological Process	GO:0048534	hemopoietic or lymphoid organ development	367	0.15	1	1	2.23	1.34	3	145	0.0667	0.0207	3	63	373	unnamed,unnamed,unnamed	unnamed,unnamed,unnamed,unnamed,unnamed,unnamed,unnamed,unnamed,unnamed,unnamed,unnamed,unnamed,unnamed,unnamed,unnamed,unnamed,unnamed,unnamed,unnamed,unnamed,unnamed,unnamed,unnamed,unnamed,unnamed,unnamed,unnamed,unnamed,unnamed,unnamed,unnamed,unnamed,unnamed,unnamed,unnamed,unnamed,unnamed,unnamed,unnamed,unnamed,unnamed,unnamed,unnamed,unnamed,unnamed,unnamed,unnamed,unnamed,unnamed,unnamed…	Il31ra,Tnfrsf11a,Txnrd2	Adam17,Add2,Ahr,Apc,Atm,Bcl2,Bcl2l11,Camk4,Ctnnb1,Cxcl13,Epas1,Fzd8,Fzd9,Gab2,Hcls1,Hes1,Hoxa3,Hs1bp3,Il31ra,Ireb2,Irf1,Jag2,Jarid2,Junb,Ldb1,Lmo4,Lyl1,Lyn,Mb,Mll5,Msh2,Ncaph2,Nkx2-5,Pbx3,Pcid2,Picalm,Plcb1,Plcg2,Pou2f2,Prdx2,Prkx,Psen1,Rbpj,Rcor1,Rtkn2,Six1,Six4,Tcf7,Tesc,Tgfb2,Tgfbr2,Thoc5,Tm7sf4,Tnfrsf11a,Tnfsf11,Tshr,Twsg1,Txnrd2,Vegfa,Vps33a,Wnt2b,Wwp1,Zbtb16
GO Biological Process	GO:0007268	synaptic transmission	368	0.151	1	1	1.93	2.07	4	224	0.0889	0.0179	4	86	257	unnamed,unnamed,unnamed,unnamed	unnamed,unnamed,unnamed,unnamed,unnamed,unnamed,unnamed,unnamed,unnamed,unnamed,unnamed,unnamed,unnamed,unnamed,unnamed,unnamed,unnamed,unnamed,unnamed,unnamed,unnamed,unnamed,unnamed,unnamed,unnamed,unnamed,unnamed,unnamed,unnamed,unnamed,unnamed,unnamed,unnamed,unnamed,unnamed,unnamed,unnamed,unnamed,unnamed,unnamed,unnamed,unnamed,unnamed,unnamed,unnamed,unnamed,unnamed,unnamed,unnamed,unnamed…	Cplx1,Gabra2,Gabrg1,Gipc1	Adrb1,Agtpbp1,Aldh5a1,Aldh9a1,Amph,Apba1,App,Atxn1,Brsk1,CacnB2,Cacna1b,Camk4,Chrna7,Chrnb1,Cln8,Clstn1,Colq,Cplx1,Cplx2,Ctnnb1,Cx3cl1,Dlg4,Dlgap1,Drd2,Exoc4,Fnta,Gabra2,Gabra3,Gabrg1,Gabrg2,Gad2,Ghrl,Gipc1,Glra1,Glrb,Gls,Gria2,Grik2,Grin1,Grin2a,Grin2b,Grin2c,Grin3b,Grm1,Grm3,Grm5,Hcrt,Htr1b,Htr7,Kcnma1,Lin7a,Lrp6,Mapk8ip2,Mtmr2,Naalad2,Nlgn3,Nrg1,Ophn1,P2rx4,Pclo,Pdlim5,Pebp1,Ppfia3,Ppp3ca,Prim…
GO Biological Process	GO:0010647	positive regulation of cell communication	369	0.152	1	1	1.76	2.84	5	307	0.111	0.0163	6	114	555	unnamed,unnamed,unnamed,unnamed,unnamed	unnamed,unnamed,unnamed,unnamed,unnamed,unnamed,unnamed,unnamed,unnamed,unnamed,unnamed,unnamed,unnamed,unnamed,unnamed,unnamed,unnamed,unnamed,unnamed,unnamed,unnamed,unnamed,unnamed,unnamed,unnamed,unnamed,unnamed,unnamed,unnamed,unnamed,unnamed,unnamed,unnamed,unnamed,unnamed,unnamed,unnamed,unnamed,unnamed,unnamed,unnamed,unnamed,unnamed,unnamed,unnamed,unnamed,unnamed,unnamed,unnamed,unnamed…	Gfap,Gipc1,Il31ra,Il6st,S100b,Tnfrsf11a	Acvr1b,Adam17,Adam8,Afap1l2,Agap2,Akt2,Ar,Arl2bp,Arrb1,Atm,Bcl10,Bmp7,Bmpr1a,Bmpr2,Braf,Cbl,Cd44,Cdon,Cntn2,Crhr2,Ctnnb1,Cyp27b1,Cyr61,Dgki,Drd2,Dusp19,Eda,Exoc4,Fasl,Fgf18,Fgf9,Fgfbp3,Fgfr3,Foxd1,Gfap,Gipc1,Golph3,Grik2,Grin2b,Grm5,Hcls1,Hcrt,Hes1,Hes5,Hipk2,Ikbke,Il31ra,Il6st,Itgb1,Kras,Lancl2,Lep,Lrp6,Lyn,Map3k7,Map4k2,Mapk8ip2,Mapksp1,Mbd2,Ncoa3,Ncs1,Ndfip1,Nenf,Nod1,Notch2,Npnt,Nrg1,Ntrk2,P2…
GO Biological Process	GO:0032200	telomere organization	370	0.154	1	1	6	0.167	1	18	0.0222	0.0556	1	5	30	unnamed	unnamed,unnamed,unnamed,unnamed,unnamed,unnamed,unnamed,unnamed,unnamed,unnamed,unnamed,unnamed,unnamed,unnamed,unnamed,unnamed,unnamed,unnamed	Hspa1b	1500010J02Rik,Hspa1b,Pinx1,Tep1,Terf1
GO Biological Process	GO:0032434	regulation of proteasomal ubiquitin-dependent protein catabolic process	370	0.154	1	1	6	0.167	1	18	0.0222	0.0556	1	11	46	unnamed	unnamed,unnamed,unnamed,unnamed,unnamed,unnamed,unnamed,unnamed,unnamed,unnamed,unnamed,unnamed,unnamed,unnamed,unnamed,unnamed,unnamed,unnamed	Gipc1	Gclc,Gipc1,N4bp1,Nub1,Psen1,Rad23b,Rchy1,Stub1,Trib2,Usp44,Vcp
GO Biological Process	GO:0046425	regulation of JAK-STAT cascade	370	0.154	1	1	6	0.167	1	18	0.0222	0.0556	2	11	58	unnamed	unnamed,unnamed,unnamed,unnamed,unnamed,unnamed,unnamed,unnamed,unnamed,unnamed,unnamed,unnamed,unnamed,unnamed,unnamed,unnamed,unnamed,unnamed	Il31ra,Il6st	Agap2,Arl2bp,Fgfr3,Hcls1,Hes1,Hes5,Il31ra,Il6st,Irf1,Lep,Lyn
GO Biological Process	GO:0048145	regulation of fibroblast proliferation	370	0.154	1	1	6	0.167	1	18	0.0222	0.0556	1	11	51	unnamed	unnamed,unnamed,unnamed,unnamed,unnamed,unnamed,unnamed,unnamed,unnamed,unnamed,unnamed,unnamed,unnamed,unnamed,unnamed,unnamed,unnamed,unnamed	Dach1	B4galt7,Dab2ip,Dach1,E2f1,Gstp1,Ndufs4,Pdgfa,Sphk1,Tgif1,Trim32,Uts2
GO Biological Process	GO:0031058	positive regulation of histone modification	370	0.154	1	1	6	0.167	1	18	0.0222	0.0556	1	8	27	unnamed	unnamed,unnamed,unnamed,unnamed,unnamed,unnamed,unnamed,unnamed,unnamed,unnamed,unnamed,unnamed,unnamed,unnamed,unnamed,unnamed,unnamed,unnamed	Brca1	Arrb1,Brca1,Jarid2,Lpin1,Nos1,Paxip1,Rps6ka5,Ube2n
GO Biological Process	GO:0006506	GPI anchor biosynthetic process	370	0.154	1	1	6	0.167	1	18	0.0222	0.0556	1	8	33	unnamed	unnamed,unnamed,unnamed,unnamed,unnamed,unnamed,unnamed,unnamed,unnamed,unnamed,unnamed,unnamed,unnamed,unnamed,unnamed,unnamed,unnamed,unnamed	Cwh43	Cwh43,Dpm1,Pgap2,Pigg,Pigm,Pign,Pigo,Pigs
GO Biological Process	GO:0008593	regulation of Notch signaling pathway	370	0.154	1	1	6	0.167	1	18	0.0222	0.0556	1	7	29	unnamed	unnamed,unnamed,unnamed,unnamed,unnamed,unnamed,unnamed,unnamed,unnamed,unnamed,unnamed,unnamed,unnamed,unnamed,unnamed,unnamed,unnamed,unnamed	Il6st	Bmp7,Hes1,Hes5,Il6st,Meg3,Nfkbia,Numb
GO Biological Process	GO:0006505	GPI anchor metabolic process	370	0.154	1	1	6	0.167	1	18	0.0222	0.0556	1	8	35	unnamed	unnamed,unnamed,unnamed,unnamed,unnamed,unnamed,unnamed,unnamed,unnamed,unnamed,unnamed,unnamed,unnamed,unnamed,unnamed,unnamed,unnamed,unnamed	Cwh43	Cwh43,Dpm1,Pgap2,Pigg,Pigm,Pign,Pigo,Pigs
GO Biological Process	GO:0000723	telomere maintenance	370	0.154	1	1	6	0.167	1	18	0.0222	0.0556	1	5	29	unnamed	unnamed,unnamed,unnamed,unnamed,unnamed,unnamed,unnamed,unnamed,unnamed,unnamed,unnamed,unnamed,unnamed,unnamed,unnamed,unnamed,unnamed,unnamed	Hspa1b	1500010J02Rik,Hspa1b,Pinx1,Tep1,Terf1
GO Biological Process	GO:0008156	negative regulation of DNA replication	370	0.154	1	1	6	0.167	1	18	0.0222	0.0556	1	7	27	unnamed	unnamed,unnamed,unnamed,unnamed,unnamed,unnamed,unnamed,unnamed,unnamed,unnamed,unnamed,unnamed,unnamed,unnamed,unnamed,unnamed,unnamed,unnamed	Tipin	Gtpbp4,Hcrt,Pds5a,Terf1,Tipin,Tspyl2,Wapal
GO Biological Process	GO:0002520	immune system development	380	0.156	1	1	2.19	1.37	3	148	0.0667	0.0203	3	66	394	unnamed,unnamed,unnamed	unnamed,unnamed,unnamed,unnamed,unnamed,unnamed,unnamed,unnamed,unnamed,unnamed,unnamed,unnamed,unnamed,unnamed,unnamed,unnamed,unnamed,unnamed,unnamed,unnamed,unnamed,unnamed,unnamed,unnamed,unnamed,unnamed,unnamed,unnamed,unnamed,unnamed,unnamed,unnamed,unnamed,unnamed,unnamed,unnamed,unnamed,unnamed,unnamed,unnamed,unnamed,unnamed,unnamed,unnamed,unnamed,unnamed,unnamed,unnamed,unnamed,unnamed…	Il31ra,Tnfrsf11a,Txnrd2	Adam17,Add2,Ahr,Apc,Atm,Bcl2,Bcl2l11,Camk4,Ctnnb1,Cxcl13,Epas1,Fzd8,Fzd9,Gab2,Hcls1,Hes1,Hoxa3,Hs1bp3,Hspd1,Icosl,Il31ra,Ireb2,Irf1,Jag2,Jarid2,Junb,Ldb1,Lmo4,Lyl1,Lyn,Mb,Mlh1,Mll5,Msh2,Ncaph2,Nkx2-5,Pbx3,Pcid2,Picalm,Plcb1,Plcg2,Pou2f2,Prdx2,Prkx,Psen1,Rbpj,Rcor1,Rtkn2,Six1,Six4,Tcf7,Tesc,Tgfb2,Tgfbr2,Thoc5,Tm7sf4,Tnfrsf11a,Tnfsf11,Tshr,Twsg1,Txnrd2,Vegfa,Vps33a,Wnt2b,Wwp1,Zbtb16
GO Biological Process	GO:0000279	M phase	380	0.156	1	1	2.19	1.37	3	148	0.0667	0.0203	2	69	365	unnamed,unnamed,unnamed	unnamed,unnamed,unnamed,unnamed,unnamed,unnamed,unnamed,unnamed,unnamed,unnamed,unnamed,unnamed,unnamed,unnamed,unnamed,unnamed,unnamed,unnamed,unnamed,unnamed,unnamed,unnamed,unnamed,unnamed,unnamed,unnamed,unnamed,unnamed,unnamed,unnamed,unnamed,unnamed,unnamed,unnamed,unnamed,unnamed,unnamed,unnamed,unnamed,unnamed,unnamed,unnamed,unnamed,unnamed,unnamed,unnamed,unnamed,unnamed,unnamed,unnamed…	Chfr,Tipin	4922501C03Rik,Anapc1,Anapc16,Anapc7,Apc,Arhgef2,Arl8a,Arpp19,Aspm,Bod1,Ccnk,Cdc6,Chfr,Cit,Clgn,Cltc,Cpeb1,Csnk1a1,Cul3,Cyp26b1,Dctn2,Dsn1,Eif4g3,Fam83d,Fmn2,Haus3,Haus6,Haus8,Hdac3,Hspa2,Ino80,Kif2a,Kif3b,Lmln,Mastl,Mau2,Mis12,Mlh1,Msh2,Msh4,Ncapd2,Nedd9,Nek1,Nek2,Nek4,Nup43,Nusap1,Pds5a,Pinx1,Pld6,Pogz,Ppp2ca,Ppp2r2d,Rec8,Rhoa,Siah1a,Sirt7,Stag2,Terf1,Tipin,Tubb5,Ube2b,Ube2c,Usp44,Usp9x,Utp14b,V…
GO Biological Process	GO:0023056	positive regulation of signaling	382	0.159	1	1	1.73	2.89	5	312	0.111	0.016	6	116	559	unnamed,unnamed,unnamed,unnamed,unnamed	unnamed,unnamed,unnamed,unnamed,unnamed,unnamed,unnamed,unnamed,unnamed,unnamed,unnamed,unnamed,unnamed,unnamed,unnamed,unnamed,unnamed,unnamed,unnamed,unnamed,unnamed,unnamed,unnamed,unnamed,unnamed,unnamed,unnamed,unnamed,unnamed,unnamed,unnamed,unnamed,unnamed,unnamed,unnamed,unnamed,unnamed,unnamed,unnamed,unnamed,unnamed,unnamed,unnamed,unnamed,unnamed,unnamed,unnamed,unnamed,unnamed,unnamed…	Gfap,Gipc1,Il31ra,Il6st,S100b,Tnfrsf11a	Acvr1b,Adam17,Adam8,Afap1l2,Agap2,Akt2,Ar,Arl2bp,Arrb1,Atm,Bcl10,Bmp7,Bmpr1a,Bmpr2,Braf,Bves,Cbl,Cd44,Cdon,Cntn2,Crhr2,Ctnnb1,Cyp27b1,Cyr61,Dgki,Drd2,Dusp19,Eda,Exoc4,Fasl,Fgf18,Fgf9,Fgfbp3,Fgfr3,Foxd1,Gfap,Gipc1,Golph3,Grik2,Grin2b,Grm5,Hcls1,Hcrt,Hes1,Hes5,Hipk2,Ikbke,Il31ra,Il6st,Itgb1,Kras,Lancl2,Lep,Lrp6,Lyn,Map3k7,Map4k2,Mapk8ip2,Mapksp1,Mbd2,Ncoa3,Ncs1,Ndfip1,Nenf,Nod1,Notch2,Npnt,Nrg1,Ntr…
GO Biological Process	GO:0050877	neurological system process	383	0.161	1	1	1.55	4.53	7	489	0.156	0.0143	8	191	1902	unnamed,unnamed,unnamed,unnamed,unnamed,unnamed,unnamed	unnamed,unnamed,unnamed,unnamed,unnamed,unnamed,unnamed,unnamed,unnamed,unnamed,unnamed,unnamed,unnamed,unnamed,unnamed,unnamed,unnamed,unnamed,unnamed,unnamed,unnamed,unnamed,unnamed,unnamed,unnamed,unnamed,unnamed,unnamed,unnamed,unnamed,unnamed,unnamed,unnamed,unnamed,unnamed,unnamed,unnamed,unnamed,unnamed,unnamed,unnamed,unnamed,unnamed,unnamed,unnamed,unnamed,unnamed,unnamed,unnamed,unnamed…	Cplx1,Gabra2,Gabrg1,Gipc1,Nefl,Olfr119,Olfr120,S100b	Abi2,Adcy5,Adra1d,Adrb1,Aff2,Afg3l2,Agtpbp1,Aldh5a1,Aldh9a1,Amph,Apba1,App,Aqp4,Atg7,Atp1a3,Atxn1,Barhl1,Bbs1,Bbs10,Bbs4,Bcr,Brsk1,CacnB2,Cacna1b,Cacna1e,Cacng2,Calb1,Calca,Camk4,Cdhr1,Cdkn1b,Chrm5,Chrna7,Chrnb1,Chst10,Cldn11,Cln8,Clstn1,Cntn2,Coch,Colq,Cplx1,Cplx2,Crh,Ctnnb1,Cx3cl1,Cyp7b1,Dag1,Dlg4,Dlgap1,Drd2,Egr2,Epas1,Exoc4,Fgfr3,Fnta,Foxs1,Fyn,Fzd9,Gabra2,Gabra3,Gabrg1,Gabrg2,Gad2,Gch1,Ghrl,…
GO Biological Process	GO:0043066	negative regulation of apoptosis	384	0.162	1	1	1.88	2.13	4	230	0.0889	0.0174	4	106	464	unnamed,unnamed,unnamed,unnamed	unnamed,unnamed,unnamed,unnamed,unnamed,unnamed,unnamed,unnamed,unnamed,unnamed,unnamed,unnamed,unnamed,unnamed,unnamed,unnamed,unnamed,unnamed,unnamed,unnamed,unnamed,unnamed,unnamed,unnamed,unnamed,unnamed,unnamed,unnamed,unnamed,unnamed,unnamed,unnamed,unnamed,unnamed,unnamed,unnamed,unnamed,unnamed,unnamed,unnamed,unnamed,unnamed,unnamed,unnamed,unnamed,unnamed,unnamed,unnamed,unnamed,unnamed…	Hspa1b,Mdm4,Nefl,Sncb	AK028549,Adam17,Adam8,Adar,Agap2,Akt2,Apc,Ar,Arhgap10,Arnt2,Asns,Atg7,Atm,Aven,Bag1,Bag3,Barhl1,Bcl10,Bcl2,Bcl2l10,Bmp7,Bnip3,Braf,Cbl,Cd44,Cdkn1b,Chst11,Cln8,Ctnnb1,Cx3cl1,Cyr61,Eef1a2,Fgfr3,Fn1,Fnta,Foxs1,Gclc,Gclm,Ghrl,Glo1,Grik2,Grin1,Gstp1,Hgf,Hipk2,Hipk3,Hspa1b,Hspb1,Hspd1,Htt,Irs2,Itgav,Lep,Lhx3,Lhx4,Lrp6,Map3k7,Mapk8,Mdm4,Mkl1,Msh2,Naip1,Nefl,Nkx2-5,Osr1,Pax2,Pax8,Pcid2,Pea15a,Pgap2,Pik3c…
GO Biological Process	GO:0050821	protein stabilization	385	0.162	1	1	5.68	0.176	1	19	0.0222	0.0526	1	13	46	unnamed	unnamed,unnamed,unnamed,unnamed,unnamed,unnamed,unnamed,unnamed,unnamed,unnamed,unnamed,unnamed,unnamed,unnamed,unnamed,unnamed,unnamed,unnamed,unnamed	Mdm4	A1cf,Apbb2,Apoa1,Cog3,Gnaq,Gtpbp4,Hspd1,Mdm4,Nckap1,Pim1,Stx12,Ube2b,Wfs1
GO Biological Process	GO:0051701	interaction with host	385	0.162	1	1	5.68	0.176	1	19	0.0222	0.0526	1	8	34	unnamed	unnamed,unnamed,unnamed,unnamed,unnamed,unnamed,unnamed,unnamed,unnamed,unnamed,unnamed,unnamed,unnamed,unnamed,unnamed,unnamed,unnamed,unnamed,unnamed	Thoc3	Bcl2l11,Itgav,Ntrk3,Rraga,Thoc3,Thoc5,Tlr1,Vapb
GO Biological Process	GO:0061077	chaperone-mediated protein folding	385	0.162	1	1	5.68	0.176	1	19	0.0222	0.0526	1	5	17	unnamed	unnamed,unnamed,unnamed,unnamed,unnamed,unnamed,unnamed,unnamed,unnamed,unnamed,unnamed,unnamed,unnamed,unnamed,unnamed,unnamed,unnamed,unnamed,unnamed	Dnajb1	Chordc1,Dnajb1,Ero1l,Hspa8,Tor1a
GO Biological Process	GO:0050729	positive regulation of inflammatory response	385	0.162	1	1	5.68	0.176	1	19	0.0222	0.0526	1	6	52	unnamed	unnamed,unnamed,unnamed,unnamed,unnamed,unnamed,unnamed,unnamed,unnamed,unnamed,unnamed,unnamed,unnamed,unnamed,unnamed,unnamed,unnamed,unnamed,unnamed	Tnfrsf11a	Adam8,Cx3cl1,Prkca,Tac1,Tnfrsf11a,Tnfsf11
GO Biological Process	GO:0045682	regulation of epidermis development	385	0.162	1	1	5.68	0.176	1	19	0.0222	0.0526	1	8	29	unnamed	unnamed,unnamed,unnamed,unnamed,unnamed,unnamed,unnamed,unnamed,unnamed,unnamed,unnamed,unnamed,unnamed,unnamed,unnamed,unnamed,unnamed,unnamed,unnamed	Mafg	Cyp27b1,Hoxa7,Keap1,Mafg,Nab1,Smad4,Tcfap2c,Tgfb2
GO Biological Process	GO:0022904	respiratory electron transport chain	385	0.162	1	1	5.68	0.176	1	19	0.0222	0.0526	1	10	28	unnamed	unnamed,unnamed,unnamed,unnamed,unnamed,unnamed,unnamed,unnamed,unnamed,unnamed,unnamed,unnamed,unnamed,unnamed,unnamed,unnamed,unnamed,unnamed,unnamed	mt-Nd4	Aldh5a1,Dld,Ncaph2,Ndufs1,Ppargc1a,Slc25a12,Slc25a13,Tymp,Uqcr10,mt-Nd4
GO Biological Process	GO:0042102	positive regulation of T cell proliferation	385	0.162	1	1	5.68	0.176	1	19	0.0222	0.0526	1	10	60	unnamed	unnamed,unnamed,unnamed,unnamed,unnamed,unnamed,unnamed,unnamed,unnamed,unnamed,unnamed,unnamed,unnamed,unnamed,unnamed,unnamed,unnamed,unnamed,unnamed	Il6st	Cd276,Cd80,Hes1,Icosl,Il6st,Nck1,Sash3,Tnfrsf13c,Tnfsf13b,Vcam1
GO Biological Process	GO:0044403	symbiosis, encompassing mutualism through parasitism	385	0.162	1	1	5.68	0.176	1	19	0.0222	0.0526	1	8	59	unnamed	unnamed,unnamed,unnamed,unnamed,unnamed,unnamed,unnamed,unnamed,unnamed,unnamed,unnamed,unnamed,unnamed,unnamed,unnamed,unnamed,unnamed,unnamed,unnamed	Thoc3	Bcl2l11,Itgav,Ntrk3,Rraga,Thoc3,Thoc5,Tlr1,Vapb
GO Biological Process	GO:0016072	rRNA metabolic process	385	0.162	1	1	5.68	0.176	1	19	0.0222	0.0526	1	12	93	unnamed	unnamed,unnamed,unnamed,unnamed,unnamed,unnamed,unnamed,unnamed,unnamed,unnamed,unnamed,unnamed,unnamed,unnamed,unnamed,unnamed,unnamed,unnamed,unnamed	Dis3l	Ddx56,Dimt1,Dis3l,Drosha,Imp4,Rpl14,Rpl5,Rpsa,Rrp36,Utp14b,Utp20,Utp6
GO Biological Process	GO:0010038	response to metal ion	394	0.169	1	1	2.7	0.741	2	80	0.0444	0.025	2	43	224	unnamed,unnamed	unnamed,unnamed,unnamed,unnamed,unnamed,unnamed,unnamed,unnamed,unnamed,unnamed,unnamed,unnamed,unnamed,unnamed,unnamed,unnamed,unnamed,unnamed,unnamed,unnamed,unnamed,unnamed,unnamed,unnamed,unnamed,unnamed,unnamed,unnamed,unnamed,unnamed,unnamed,unnamed,unnamed,unnamed,unnamed,unnamed,unnamed,unnamed,unnamed,unnamed,unnamed,unnamed,unnamed,unnamed,unnamed,unnamed,unnamed,unnamed,unnamed,unnamed…	Dusp1,Txnrd2	Atf1,Bcl2,Bdh1,Bnip3,Calm2,Calm3,Ccnd1,Cdkn1b,Cps1,Ctnnb1,Cuta,Cyp2r1,Drd2,Dusp1,Ggh,Grin2a,Grin2b,Haao,Hmbs,Htt,Junb,Kcnmb3,Kcnmb4,Khk,Mapk8,Mapk9,Mef2a,Mt1,Nedd4l,Pebp1,Pgam2,Plcg2,Sdc1,Slc18a1,Slc18a2,Slc25a12,Slc25a13,Slc6a3,Sod1,Sod3,Srebf2,Tspo,Txnrd2
GO Biological Process	GO:0043069	negative regulation of programmed cell death	395	0.169	1	1	1.85	2.17	4	234	0.0889	0.0171	4	108	469	unnamed,unnamed,unnamed,unnamed	unnamed,unnamed,unnamed,unnamed,unnamed,unnamed,unnamed,unnamed,unnamed,unnamed,unnamed,unnamed,unnamed,unnamed,unnamed,unnamed,unnamed,unnamed,unnamed,unnamed,unnamed,unnamed,unnamed,unnamed,unnamed,unnamed,unnamed,unnamed,unnamed,unnamed,unnamed,unnamed,unnamed,unnamed,unnamed,unnamed,unnamed,unnamed,unnamed,unnamed,unnamed,unnamed,unnamed,unnamed,unnamed,unnamed,unnamed,unnamed,unnamed,unnamed…	Hspa1b,Mdm4,Nefl,Sncb	AK028549,Adam17,Adam8,Adar,Agap2,Akt2,Apc,Ar,Arhgap10,Arnt2,Asns,Atg7,Atm,Aven,Bag1,Bag3,Barhl1,Bcl10,Bcl2,Bcl2l10,Bhlhe23,Bmp7,Bnip3,Braf,Cbl,Cd44,Cdkn1b,Chst11,Cln8,Ctnnb1,Cx3cl1,Cyr61,Eef1a2,Fgfr3,Fn1,Fnta,Foxs1,Gclc,Gclm,Ghrl,Glo1,Grik2,Grin1,Gstp1,Hgf,Hipk2,Hipk3,Hspa1b,Hspb1,Hspd1,Htt,Irs2,Itgav,Lep,Lhx3,Lhx4,Lrp6,Map3k7,Mapk8,Mdm4,Mkl1,Msh2,Naip1,Nefl,Nkx2-5,Osr1,Pax2,Pax8,Pcid2,Pea15a,Pga…
GO Biological Process	GO:0044087	regulation of cellular component biogenesis	396	0.17	1	1	2.1	1.43	3	154	0.0667	0.0195	1	61	238	unnamed,unnamed,unnamed	unnamed,unnamed,unnamed,unnamed,unnamed,unnamed,unnamed,unnamed,unnamed,unnamed,unnamed,unnamed,unnamed,unnamed,unnamed,unnamed,unnamed,unnamed,unnamed,unnamed,unnamed,unnamed,unnamed,unnamed,unnamed,unnamed,unnamed,unnamed,unnamed,unnamed,unnamed,unnamed,unnamed,unnamed,unnamed,unnamed,unnamed,unnamed,unnamed,unnamed,unnamed,unnamed,unnamed,unnamed,unnamed,unnamed,unnamed,unnamed,unnamed,unnamed…	Limk1	Actr3b,Add2,Ahr,Apc,Arap1,Arf6,Arpc3,Arpc5,Bag5,Bbs4,Bcl2l11,Cand1,Capza2,Cdc42ep4,Cdkn1b,Clip1,Cxcl13,Cyr61,Dlg1,Efna5,Epb4.1l5,Fert2,Ghrl,Gpr65,Grin1,Jmy,Limk1,Lmo4,Mpp7,Mtap1b,Nck1,Nkx2-5,Nlgn3,Pak3,Paxip1,Pdlim5,Pfn2,Pink1,Podxl,Ppp1r16b,Prkca,Rala,Rasa1,Rhoa,Slit1,Slit2,Snap25,Snx9,Sost,Spna2,Ssh1,Ssh2,Stmn2,Stub1,Synpo,Tac1,Terf1,Tppp,Vcp,Vil1,Wnt11
GO Biological Process	GO:0045930	negative regulation of mitotic cell cycle	397	0.17	1	1	5.4	0.185	1	20	0.0222	0.05	1	7	28	unnamed	unnamed,unnamed,unnamed,unnamed,unnamed,unnamed,unnamed,unnamed,unnamed,unnamed,unnamed,unnamed,unnamed,unnamed,unnamed,unnamed,unnamed,unnamed,unnamed,unnamed	Tipin	Apbb2,Bcl2,Dlg1,Myo16,Ptpn3,Tipin,Usp47
GO Biological Process	GO:2001020	regulation of response to DNA damage stimulus	397	0.17	1	1	5.4	0.185	1	20	0.0222	0.05	1	9	55	unnamed	unnamed,unnamed,unnamed,unnamed,unnamed,unnamed,unnamed,unnamed,unnamed,unnamed,unnamed,unnamed,unnamed,unnamed,unnamed,unnamed,unnamed,unnamed,unnamed,unnamed	Brca1	Atm,Axin2,Brca1,Cd44,Chek1,Gm5136,Ppp4r2,Rnf168,Ube2n
GO Biological Process	GO:0043507	positive regulation of JUN kinase activity	397	0.17	1	1	5.4	0.185	1	20	0.0222	0.05	1	9	40	unnamed	unnamed,unnamed,unnamed,unnamed,unnamed,unnamed,unnamed,unnamed,unnamed,unnamed,unnamed,unnamed,unnamed,unnamed,unnamed,unnamed,unnamed,unnamed,unnamed,unnamed	Tnfrsf11a	B230120H23Rik,Dab2ip,Dusp19,Irak1,Map3k7,Map4k2,Spag9,Tnfrsf11a,Tnfsf11
GO Biological Process	GO:0006895	Golgi to endosome transport	397	0.17	1	1	5.4	0.185	1	20	0.0222	0.05	1	4	6	unnamed	unnamed,unnamed,unnamed,unnamed,unnamed,unnamed,unnamed,unnamed,unnamed,unnamed,unnamed,unnamed,unnamed,unnamed,unnamed,unnamed,unnamed,unnamed,unnamed,unnamed	Mon2	Kif16b,Mon2,Rab14,Slc30a6
GO Biological Process	GO:0010740	positive regulation of intracellular protein kinase cascade	401	0.172	1	1	2.09	1.44	3	155	0.0667	0.0194	4	59	286	unnamed,unnamed,unnamed	unnamed,unnamed,unnamed,unnamed,unnamed,unnamed,unnamed,unnamed,unnamed,unnamed,unnamed,unnamed,unnamed,unnamed,unnamed,unnamed,unnamed,unnamed,unnamed,unnamed,unnamed,unnamed,unnamed,unnamed,unnamed,unnamed,unnamed,unnamed,unnamed,unnamed,unnamed,unnamed,unnamed,unnamed,unnamed,unnamed,unnamed,unnamed,unnamed,unnamed,unnamed,unnamed,unnamed,unnamed,unnamed,unnamed,unnamed,unnamed,unnamed,unnamed…	Il31ra,Il6st,S100b,Tnfrsf11a	Adam8,Agap2,Ar,Arl2bp,Arrb1,Bcl10,Braf,Cd44,Cdon,Ctnnb1,Drd2,Dusp19,Eda,Fasl,Fgf18,Fgf9,Fgfr3,Grm5,Hcls1,Hes1,Hes5,Hipk2,Ikbke,Il31ra,Il6st,Itgb1,Kras,Lep,Lyn,Map3k7,Map4k2,Mapk8ip2,Ndfip1,Nenf,Nod1,Pdgfa,Pink1,Plcb1,Ppm1a,Prkce,Rasd2,Rbck1,Rhoa,Ripk1,S100b,Slc20a1,Spry2,Tab2,Taok3,Tmem101,Tnfrsf11a,Tnfsf10,Tnfsf11,Tpd52l1,Traf4,Traf5,Ube2n,Wnt11,Zdhhc17
GO Biological Process	GO:0031667	response to nutrient levels	402	0.174	1	1	2.08	1.44	3	156	0.0667	0.0192	3	60	336	unnamed,unnamed,unnamed	unnamed,unnamed,unnamed,unnamed,unnamed,unnamed,unnamed,unnamed,unnamed,unnamed,unnamed,unnamed,unnamed,unnamed,unnamed,unnamed,unnamed,unnamed,unnamed,unnamed,unnamed,unnamed,unnamed,unnamed,unnamed,unnamed,unnamed,unnamed,unnamed,unnamed,unnamed,unnamed,unnamed,unnamed,unnamed,unnamed,unnamed,unnamed,unnamed,unnamed,unnamed,unnamed,unnamed,unnamed,unnamed,unnamed,unnamed,unnamed,unnamed,unnamed…	Brca1,Dusp1,Il6st	Acat1,Adnp2,Asns,Atg4b,Atg7,Bcl2,Bdh1,Bmpr2,Brca1,Ccnd1,Chrna7,Clk2,Cps1,Cyp26b1,Cyp27b1,Dusp1,Fzd1,Ghrl,Grin2b,Gstp1,Hmbs,Hmgcr,Il6st,Irf1,Itgb1,Klf4,Lep,Lrp6,Ltc4s,Lyn,Mll5,Mpo,Mtap1b,Mtap7,Ncoa1,Nrf1,Ntrk3,Osr1,Pax2,Pfkfb1,Pik3c3,Prkaa2,Psen1,Ptk6,Rb1cc1,Rps6kb1,Serpinc1,Slc18a2,Slc39a5,Sod1,Spp1,Stc2,Tgfb2,Timp3,Tnrc6a,Tspo,Ulk2,Vcam1,Vldlr,Wipi2
GO Biological Process	GO:0051093	negative regulation of developmental process	403	0.177	1	1	1.82	2.2	4	238	0.0889	0.0168	1	87	431	unnamed,unnamed,unnamed,unnamed	unnamed,unnamed,unnamed,unnamed,unnamed,unnamed,unnamed,unnamed,unnamed,unnamed,unnamed,unnamed,unnamed,unnamed,unnamed,unnamed,unnamed,unnamed,unnamed,unnamed,unnamed,unnamed,unnamed,unnamed,unnamed,unnamed,unnamed,unnamed,unnamed,unnamed,unnamed,unnamed,unnamed,unnamed,unnamed,unnamed,unnamed,unnamed,unnamed,unnamed,unnamed,unnamed,unnamed,unnamed,unnamed,unnamed,unnamed,unnamed,unnamed,unnamed…	2012-03-05	AK028549,Abcg1,Apc,App,Arhgef2,Aspm,Axin2,Bcl2,Bhlhe23,Bmp7,Bmpr1a,Bnip3,Ccnd1,Cdk5rap2,Cit,Cntn2,Cntn4,Crebbp,Crhr2,Ctnnb1,D130043K22Rik,Efna1,Esrrb,Fasl,Fgfr3,Foxo4,Frzb,Gdf11,Hdac4,Hes1,Hes5,Hist1h4i,Hook3,Hoxa7,Id4,Itgav,Itgb1,Klf13,Klf4,Ldb1,Lect1,Lep,Lrp6,Mafb,March5,Meg3,Mt3,Nanos2,Nfkbia,Nkx2-5,Nodal,Nrp1,Ntrk3,Osr1,Pax2,Pax6,Pax8,Pcm1,Ppp2ca,Prdx2,Psen1,Pthlh,Ptprm,Rbpj,Rc3h1,Sall1,Sema3…
GO Biological Process	GO:0070555	response to interleukin-1	404	0.178	1	1	5.14	0.194	1	21	0.0222	0.0476	1	8	52	unnamed	unnamed,unnamed,unnamed,unnamed,unnamed,unnamed,unnamed,unnamed,unnamed,unnamed,unnamed,unnamed,unnamed,unnamed,unnamed,unnamed,unnamed,unnamed,unnamed,unnamed,unnamed	Tnfrsf11a	Hdac4,Irak1,Irf1,Plcb1,Prkca,Rps6ka5,Tnfrsf11a,Vldlr
GO Biological Process	GO:0071456	cellular response to hypoxia	404	0.178	1	1	5.14	0.194	1	21	0.0222	0.0476	1	8	32	unnamed	unnamed,unnamed,unnamed,unnamed,unnamed,unnamed,unnamed,unnamed,unnamed,unnamed,unnamed,unnamed,unnamed,unnamed,unnamed,unnamed,unnamed,unnamed,unnamed,unnamed,unnamed	Mdm4	Adam8,Bnip3,E2f1,Mdm4,Prkce,Stc2,Vegfa,Vldlr
GO Biological Process	GO:0051297	centrosome organization	404	0.178	1	1	5.14	0.194	1	21	0.0222	0.0476	1	10	36	unnamed	unnamed,unnamed,unnamed,unnamed,unnamed,unnamed,unnamed,unnamed,unnamed,unnamed,unnamed,unnamed,unnamed,unnamed,unnamed,unnamed,unnamed,unnamed,unnamed,unnamed,unnamed	Brca1	Bbs4,Brca1,Brsk1,Cdk5rap2,Ctnnb1,Haus3,Haus6,Haus8,Nek2,Pcm1
GO Biological Process	GO:0010565	regulation of cellular ketone metabolic process	404	0.178	1	1	5.14	0.194	1	21	0.0222	0.0476	1	12	73	unnamed	unnamed,unnamed,unnamed,unnamed,unnamed,unnamed,unnamed,unnamed,unnamed,unnamed,unnamed,unnamed,unnamed,unnamed,unnamed,unnamed,unnamed,unnamed,unnamed,unnamed,unnamed	Brca1	Akt2,Ankrd26,Arpp19,Brca1,Clk2,Cyp7a1,Gnmt,Irs2,Lep,Pax8,Ppargc1a,Stk11
GO Biological Process	GO:0002673	regulation of acute inflammatory response	404	0.178	1	1	5.14	0.194	1	21	0.0222	0.0476	1	8	41	unnamed	unnamed,unnamed,unnamed,unnamed,unnamed,unnamed,unnamed,unnamed,unnamed,unnamed,unnamed,unnamed,unnamed,unnamed,unnamed,unnamed,unnamed,unnamed,unnamed,unnamed,unnamed	Tnfrsf11a	Adam8,C6,Cd46,Gstp1,Serping1,Tac1,Tnfrsf11a,Tnfsf11
GO Biological Process	GO:0031023	microtubule organizing center organization	404	0.178	1	1	5.14	0.194	1	21	0.0222	0.0476	1	10	41	unnamed	unnamed,unnamed,unnamed,unnamed,unnamed,unnamed,unnamed,unnamed,unnamed,unnamed,unnamed,unnamed,unnamed,unnamed,unnamed,unnamed,unnamed,unnamed,unnamed,unnamed,unnamed	Brca1	Bbs4,Brca1,Brsk1,Cdk5rap2,Ctnnb1,Haus3,Haus6,Haus8,Nek2,Pcm1
GO Biological Process	GO:0031398	positive regulation of protein ubiquitination	404	0.178	1	1	5.14	0.194	1	21	0.0222	0.0476	1	13	51	unnamed	unnamed,unnamed,unnamed,unnamed,unnamed,unnamed,unnamed,unnamed,unnamed,unnamed,unnamed,unnamed,unnamed,unnamed,unnamed,unnamed,unnamed,unnamed,unnamed,unnamed,unnamed	Brca1	Bcl10,Brca1,Fgfr3,Ndfip1,Paxip1,Pin1,Rchy1,Sphk1,Stub1,Tbc1d7,Trib2,Ube2n,Wfs1
GO Biological Process	GO:0006887	exocytosis	411	0.179	1	1	2.6	0.769	2	83	0.0444	0.0241	1	33	123	unnamed,unnamed	unnamed,unnamed,unnamed,unnamed,unnamed,unnamed,unnamed,unnamed,unnamed,unnamed,unnamed,unnamed,unnamed,unnamed,unnamed,unnamed,unnamed,unnamed,unnamed,unnamed,unnamed,unnamed,unnamed,unnamed,unnamed,unnamed,unnamed,unnamed,unnamed,unnamed,unnamed,unnamed,unnamed,unnamed,unnamed,unnamed,unnamed,unnamed,unnamed,unnamed,unnamed,unnamed,unnamed,unnamed,unnamed,unnamed,unnamed,unnamed,unnamed,unnamed…	Cplx1	1500003O03Rik,Acr,Cplx1,Cplx2,Exoc4,Exoc5,Exoc6b,Exoc7,Exoc8,Glra1,Glrb,Lat,Lgi3,Lin7a,Lin7b,Llgl1,Lyn,Pclo,Psen1,Rala,Rapgef4,Rims1,Rims2,Rims3,Scamp1,Scrn1,Slc17a9,Stx4a,Stxbp5l,Trim36,Unc13a,Vps33a,Ywhaz
GO Biological Process	GO:2000026	regulation of multicellular organismal development	412	0.181	1	1	1.5	4.68	7	505	0.156	0.0139	6	207	942	unnamed,unnamed,unnamed,unnamed,unnamed,unnamed,unnamed	unnamed,unnamed,unnamed,unnamed,unnamed,unnamed,unnamed,unnamed,unnamed,unnamed,unnamed,unnamed,unnamed,unnamed,unnamed,unnamed,unnamed,unnamed,unnamed,unnamed,unnamed,unnamed,unnamed,unnamed,unnamed,unnamed,unnamed,unnamed,unnamed,unnamed,unnamed,unnamed,unnamed,unnamed,unnamed,unnamed,unnamed,unnamed,unnamed,unnamed,unnamed,unnamed,unnamed,unnamed,unnamed,unnamed,unnamed,unnamed,unnamed,unnamed…	Gfap,Il6st,Limk1,Mafg,Nefl,Nefm	AK028549,Adam8,Adrb1,Agap2,Ahr,Apc,Apold1,App,Ar,Arf6,Arhgef2,Aspm,Atf1,Atoh1,Axin2,BC096441,Bcl2,Bhlhe23,Bmp7,Bmpr1a,Bmpr1b,Bmpr2,C5ar1,C6,Cblb,Ccnd1,Ccnd2,Cd276,Cd83,Cdh4,Cdk5r1,Cdk5rap2,Cdkn1b,Cdon,Chn1,Cit,Cntn2,Cntn4,Crhr2,Cthrc1,Ctnnb1,Cul7,Cx3cl1,Cyp27b1,Cyr61,D130043K22Rik,Ddah1,Drd2,Efna1,Epb4.1l5,Erap1,Etv4,Etv5,Fasl,Fez1,Fgf18,Fgf9,Fgfr3,Foxd1,Foxo4,Frs2,Frzb,Gdf11,Gfap,Ghrl,Glg1,Gm614…
GO Biological Process	GO:0006950	response to stress	413	0.181	1	1	1.37	7.29	10	787	0.222	0.0127	10	349	1866	unnamed,unnamed,unnamed,unnamed,unnamed,unnamed,unnamed,unnamed,unnamed,unnamed	unnamed,unnamed,unnamed,unnamed,unnamed,unnamed,unnamed,unnamed,unnamed,unnamed,unnamed,unnamed,unnamed,unnamed,unnamed,unnamed,unnamed,unnamed,unnamed,unnamed,unnamed,unnamed,unnamed,unnamed,unnamed,unnamed,unnamed,unnamed,unnamed,unnamed,unnamed,unnamed,unnamed,unnamed,unnamed,unnamed,unnamed,unnamed,unnamed,unnamed,unnamed,unnamed,unnamed,unnamed,unnamed,unnamed,unnamed,unnamed,unnamed,unnamed…	Brca1,Dnajb1,Dusp1,Gfap,Hspa1b,Mdm4,Nefl,Tipin,Txnrd2,mt-Nd4	1500015O10Rik,2310003H01Rik,Abhd2,Acat1,Adam17,Adam8,Adnp2,Adrb1,Adrbk1,Afap1l2,Ahr,Ahsa1,Ahsa2,Akt2,Alkbh2,Alkbh3,Alkbh8,Apc,Apold1,Aqp4,Arf4,Arnt2,Asns,Atg4b,Atg7,Atm,Atp1b1,Atrn,Atrx,B230120H23Rik,Baz1b,Bcl10,Bcl2,Bdh1,Bmpr1b,Bmpr2,Bnip3,Brca1,Brsk1,C5ar1,C77370,Cacna1b,Cacna1e,Calca,Camk4,Ccl17,Ccnd1,Ccno,Cd44,Cdk7,Chek1,Chordc1,Chst2,Cinp,Cln8,Clock,Cnpy3,Col4a3bp,Cps1,Crh,Ctgf,Cul4b,Cul5,Cx…
GO Biological Process	GO:0002521	leukocyte differentiation	414	0.182	1	1	2.57	0.778	2	84	0.0444	0.0238	2	32	197	unnamed,unnamed	unnamed,unnamed,unnamed,unnamed,unnamed,unnamed,unnamed,unnamed,unnamed,unnamed,unnamed,unnamed,unnamed,unnamed,unnamed,unnamed,unnamed,unnamed,unnamed,unnamed,unnamed,unnamed,unnamed,unnamed,unnamed,unnamed,unnamed,unnamed,unnamed,unnamed,unnamed,unnamed,unnamed,unnamed,unnamed,unnamed,unnamed,unnamed,unnamed,unnamed,unnamed,unnamed,unnamed,unnamed,unnamed,unnamed,unnamed,unnamed,unnamed,unnamed…	Il31ra,Tnfrsf11a	Adam17,Ahr,Apc,Atm,Bcl2,Camk4,Ctnnb1,Fzd8,Fzd9,Gab2,Hs1bp3,Il31ra,Ireb2,Irf1,Jag2,Junb,Lyl1,Msh2,Ncaph2,Plcb1,Plcg2,Pou2f2,Psen1,Rbpj,Tcf7,Tgfbr2,Thoc5,Tm7sf4,Tnfrsf11a,Tnfsf11,Tshr,Wwp1
GO Biological Process	GO:0046903	secretion	415	0.184	1	1	2.03	1.48	3	160	0.0667	0.0188	2	71	326	unnamed,unnamed,unnamed	unnamed,unnamed,unnamed,unnamed,unnamed,unnamed,unnamed,unnamed,unnamed,unnamed,unnamed,unnamed,unnamed,unnamed,unnamed,unnamed,unnamed,unnamed,unnamed,unnamed,unnamed,unnamed,unnamed,unnamed,unnamed,unnamed,unnamed,unnamed,unnamed,unnamed,unnamed,unnamed,unnamed,unnamed,unnamed,unnamed,unnamed,unnamed,unnamed,unnamed,unnamed,unnamed,unnamed,unnamed,unnamed,unnamed,unnamed,unnamed,unnamed,unnamed…	Cplx1,Gipc1	1500003O03Rik,Acr,Agr2,Apba1,Arfgap3,Brsk1,Cacna1b,Ccnd1,Cplx1,Cplx2,Ctgf,Dio2,Drd2,Exoc4,Exoc5,Exoc6b,Exoc7,Exoc8,Ghrl,Gipc1,Glra1,Glrb,Gnptab,Htt,Kcnma1,Lat,Lax1,Lep,Lgi3,Lin7a,Lin7b,Llgl1,Ly6e,Lyn,Lyst,Mafa,Meg3,Neurl1a,Nr3c2,Ntrk2,Pclo,Pla2g4f,Pou2f2,Ppfia3,Psen1,Ptges2,Rab14,Rala,Rapgef4,Rims1,Rims2,Rims3,Scamp1,Scrn1,Slc17a9,Slc18a2,Slc6a3,Smad2,Smpd3,Snap25,Stx4a,Stxbp5l,Tnfsf13b,Trim36,Tr…
GO Biological Process	GO:0006468	protein phosphorylation	416	0.185	1	1	1.55	3.86	6	417	0.133	0.0144	3	165	709	unnamed,unnamed,unnamed,unnamed,unnamed,unnamed	unnamed,unnamed,unnamed,unnamed,unnamed,unnamed,unnamed,unnamed,unnamed,unnamed,unnamed,unnamed,unnamed,unnamed,unnamed,unnamed,unnamed,unnamed,unnamed,unnamed,unnamed,unnamed,unnamed,unnamed,unnamed,unnamed,unnamed,unnamed,unnamed,unnamed,unnamed,unnamed,unnamed,unnamed,unnamed,unnamed,unnamed,unnamed,unnamed,unnamed,unnamed,unnamed,unnamed,unnamed,unnamed,unnamed,unnamed,unnamed,unnamed,unnamed…	Gak,Hipk4,Limk1	Acvr1b,Adam8,Adrbk1,Akt2,Akt3,Alpk2,Ankk1,App,Atm,B230120H23Rik,Baz1b,Bcl2,Bcr,Bmp7,Bmpr1a,Bmpr1b,Bmpr2,Braf,Brd4,Brsk1,Camk2d,Camk4,Camkk2,Cbl,Ccnd1,Ccnh,Ccnt1,Cdc42bpa,Cdk14,Cdk5r1,Cdk7,Cdk8,Cdkl1,Cfl1,Chek1,Cit,Clk1,Clk2,Csnk1a1,Csnk1g2,Csnk2a1,Csnk2a2,D8Ertd82e,Dclk1,Dyrk1a,Dyrk1b,Dyrk2,Eef2k,Efna1,Epha5,Ercc3,Ern1,Fastkd2,Fert2,Fgfr3,Frs2,Fyn,Gak,Ghrl,Gm7168,Grm1,Grm5,Gtf2h2,Hgf,Hipk2,Hipk3,…
GO Biological Process	GO:0031056	regulation of histone modification	417	0.185	1	1	4.91	0.204	1	22	0.0222	0.0455	1	11	44	unnamed	unnamed,unnamed,unnamed,unnamed,unnamed,unnamed,unnamed,unnamed,unnamed,unnamed,unnamed,unnamed,unnamed,unnamed,unnamed,unnamed,unnamed,unnamed,unnamed,unnamed,unnamed,unnamed	Brca1	Arrb1,Brca1,Chek1,Jarid2,Lpin1,Mapk8,Nos1,Paxip1,Rps6ka5,Ube2b,Ube2n
GO Biological Process	GO:0042417	dopamine metabolic process	417	0.185	1	1	4.91	0.204	1	22	0.0222	0.0455	1	8	21	unnamed	unnamed,unnamed,unnamed,unnamed,unnamed,unnamed,unnamed,unnamed,unnamed,unnamed,unnamed,unnamed,unnamed,unnamed,unnamed,unnamed,unnamed,unnamed,unnamed,unnamed,unnamed,unnamed	Sncb	Chrna7,Cyp2d22,Drd2,Gch1,Grin2a,Slc6a3,Sncb,Tgfb2
GO Biological Process	GO:0030316	osteoclast differentiation	417	0.185	1	1	4.91	0.204	1	22	0.0222	0.0455	1	7	20	unnamed	unnamed,unnamed,unnamed,unnamed,unnamed,unnamed,unnamed,unnamed,unnamed,unnamed,unnamed,unnamed,unnamed,unnamed,unnamed,unnamed,unnamed,unnamed,unnamed,unnamed,unnamed,unnamed	Tnfrsf11a	Ctnnb1,Gab2,Ireb2,Junb,Tm7sf4,Tnfrsf11a,Tnfsf11
GO Biological Process	GO:0008629	induction of apoptosis by intracellular signals	417	0.185	1	1	4.91	0.204	1	22	0.0222	0.0455	1	13	49	unnamed	unnamed,unnamed,unnamed,unnamed,unnamed,unnamed,unnamed,unnamed,unnamed,unnamed,unnamed,unnamed,unnamed,unnamed,unnamed,unnamed,unnamed,unnamed,unnamed,unnamed,unnamed,unnamed	Brca1	2810002N01Rik,Atm,Bnip3,Brca1,Diablo,Dyrk2,Ikbke,Mlh1,Msh2,Prkca,Sfn,Stk11,Stk24
GO Biological Process	GO:0006885	regulation of pH	417	0.185	1	1	4.91	0.204	1	22	0.0222	0.0455	1	8	37	unnamed	unnamed,unnamed,unnamed,unnamed,unnamed,unnamed,unnamed,unnamed,unnamed,unnamed,unnamed,unnamed,unnamed,unnamed,unnamed,unnamed,unnamed,unnamed,unnamed,unnamed,unnamed,unnamed	Mafg	Aqp11,Atp6v0c,Fasl,Mafg,Slc4a3,Slc9a6,Slc9a7,Slc9a9
GO Biological Process	GO:0006661	phosphatidylinositol biosynthetic process	417	0.185	1	1	4.91	0.204	1	22	0.0222	0.0455	1	10	40	unnamed	unnamed,unnamed,unnamed,unnamed,unnamed,unnamed,unnamed,unnamed,unnamed,unnamed,unnamed,unnamed,unnamed,unnamed,unnamed,unnamed,unnamed,unnamed,unnamed,unnamed,unnamed,unnamed	Cwh43	Cwh43,Dpm1,Htr2a,Pgap2,Pigg,Pigm,Pign,Pigo,Pigs,Slc27a1
GO Biological Process	GO:0009628	response to abiotic stimulus	423	0.186	1	1	1.78	2.25	4	243	0.0889	0.0165	4	105	525	unnamed,unnamed,unnamed,unnamed	unnamed,unnamed,unnamed,unnamed,unnamed,unnamed,unnamed,unnamed,unnamed,unnamed,unnamed,unnamed,unnamed,unnamed,unnamed,unnamed,unnamed,unnamed,unnamed,unnamed,unnamed,unnamed,unnamed,unnamed,unnamed,unnamed,unnamed,unnamed,unnamed,unnamed,unnamed,unnamed,unnamed,unnamed,unnamed,unnamed,unnamed,unnamed,unnamed,unnamed,unnamed,unnamed,unnamed,unnamed,unnamed,unnamed,unnamed,unnamed,unnamed,unnamed…	Brca1,Dusp1,Hspa1b,Tipin	Acan,Afap1,Akt2,App,Arrb1,Asns,Atm,Atp1a3,Atxn1,B230120H23Rik,Bcl10,Bcl2,Bnip3,Brca1,Brsk1,Cacna1e,Calca,Cblb,Ccnd1,Chek1,Clk2,Clock,Cul5,Cyp2r1,Dio2,Dnaja1,Drd2,Dusp1,Ercc3,Etv1,Fancg,Fyn,Gclc,Gja3,Gm5136,Gmpr,Gpr65,Grin1,Grin2a,Grin2b,Grm1,Gyk,Hmgcr,Hspa1b,Hspa4,Htr1b,Htt,Ino80,Ints7,Irf1,Itgb1,Junb,Kcnj3,Kcnj6,Kras,Lxn,Lyn,Mapk8,Mat2a,Mkks,Mmp13,Mpo,Msh2,Mtap1b,Mtap7,Nek1,Neto1,Nlgn3,Nos1,Nrf1…
GO Biological Process	GO:0010627	regulation of intracellular protein kinase cascade	424	0.188	1	1	1.77	2.26	4	244	0.0889	0.0164	5	97	432	unnamed,unnamed,unnamed,unnamed	unnamed,unnamed,unnamed,unnamed,unnamed,unnamed,unnamed,unnamed,unnamed,unnamed,unnamed,unnamed,unnamed,unnamed,unnamed,unnamed,unnamed,unnamed,unnamed,unnamed,unnamed,unnamed,unnamed,unnamed,unnamed,unnamed,unnamed,unnamed,unnamed,unnamed,unnamed,unnamed,unnamed,unnamed,unnamed,unnamed,unnamed,unnamed,unnamed,unnamed,unnamed,unnamed,unnamed,unnamed,unnamed,unnamed,unnamed,unnamed,unnamed,unnamed…	Dusp1,Il31ra,Il6st,S100b,Tnfrsf11a	Adam8,Agap2,Akap11,Akap6,Akt2,Apc,Ar,Arl2bp,Arrb1,B230120H23Rik,Bcl10,Braf,Btrc,Cd44,Cdon,Cops5,Ctnnb1,Cyr61,Dab2ip,Dag1,Drd2,Dusp1,Dusp19,Dusp3,Dusp4,Dusp8,Dusp9,Eda,Fasl,Fgf18,Fgf9,Fgfr3,Fktn,Grik2,Grin2b,Grm1,Grm5,Gstp1,Hcls1,Hdac3,Hes1,Hes5,Hipk2,Hipk3,Hspb1,Ikbke,Il31ra,Il6st,Irak1,Irf1,Itgb1,Klf4,Kras,Lax1,Lep,Lyn,Map3k7,Map4k2,Mapk8ip2,Ndfip1,Nenf,Nod1,Pdgfa,Pebp1,Pin1,Pink1,Pja2,Plcb1,Ple…
GO Biological Process	GO:0042770	signal transduction in response to DNA damage	425	0.193	1	1	4.7	0.213	1	23	0.0222	0.0435	1	11	52	unnamed	unnamed,unnamed,unnamed,unnamed,unnamed,unnamed,unnamed,unnamed,unnamed,unnamed,unnamed,unnamed,unnamed,unnamed,unnamed,unnamed,unnamed,unnamed,unnamed,unnamed,unnamed,unnamed,unnamed	Brca1	Atm,Brca1,Dyrk2,Hipk2,Ikbke,Kat5,Mlh1,Msh2,Paxip1,Pgap2,Sfn
GO Biological Process	GO:0051168	nuclear export	426	0.201	1	1	4.5	0.222	1	24	0.0222	0.0417	1	11	52	unnamed	unnamed,unnamed,unnamed,unnamed,unnamed,unnamed,unnamed,unnamed,unnamed,unnamed,unnamed,unnamed,unnamed,unnamed,unnamed,unnamed,unnamed,unnamed,unnamed,unnamed,unnamed,unnamed,unnamed,unnamed	Thoc3	Atxn1,Ddx25,Egr2,Gle1,Hnrnpa1,Ncbp2,Nup107,Rpsa,Thoc3,Thoc5,Xpo5
GO Biological Process	GO:0055067	monovalent inorganic cation homeostasis	426	0.201	1	1	4.5	0.222	1	24	0.0222	0.0417	1	10	46	unnamed	unnamed,unnamed,unnamed,unnamed,unnamed,unnamed,unnamed,unnamed,unnamed,unnamed,unnamed,unnamed,unnamed,unnamed,unnamed,unnamed,unnamed,unnamed,unnamed,unnamed,unnamed,unnamed,unnamed,unnamed	Mafg	Aqp11,Atp6v0c,Fasl,Kcna5,Mafg,Nr3c2,Slc4a3,Slc9a6,Slc9a7,Slc9a9
GO Biological Process	GO:0071453	cellular response to oxygen levels	426	0.201	1	1	4.5	0.222	1	24	0.0222	0.0417	1	9	35	unnamed	unnamed,unnamed,unnamed,unnamed,unnamed,unnamed,unnamed,unnamed,unnamed,unnamed,unnamed,unnamed,unnamed,unnamed,unnamed,unnamed,unnamed,unnamed,unnamed,unnamed,unnamed,unnamed,unnamed,unnamed	Mdm4	Adam8,Bnip3,E2f1,Mdm4,Prkce,Stc2,Uck2,Vegfa,Vldlr
GO Biological Process	GO:0048710	regulation of astrocyte differentiation	426	0.201	1	1	4.5	0.222	1	24	0.0222	0.0417	1	7	23	unnamed	unnamed,unnamed,unnamed,unnamed,unnamed,unnamed,unnamed,unnamed,unnamed,unnamed,unnamed,unnamed,unnamed,unnamed,unnamed,unnamed,unnamed,unnamed,unnamed,unnamed,unnamed,unnamed,unnamed,unnamed	Il6st	Cntn2,Fgfr3,Hes1,Hes5,Id4,Il6st,Ntrk3
GO Biological Process	GO:0014910	regulation of smooth muscle cell migration	426	0.201	1	1	4.5	0.222	1	24	0.0222	0.0417	1	6	24	unnamed	unnamed,unnamed,unnamed,unnamed,unnamed,unnamed,unnamed,unnamed,unnamed,unnamed,unnamed,unnamed,unnamed,unnamed,unnamed,unnamed,unnamed,unnamed,unnamed,unnamed,unnamed,unnamed,unnamed,unnamed	Il6st	Bcl2,Il6st,Pdgfa,Rapgef4,Rps6kb1,Slit2
GO Biological Process	GO:0043506	regulation of JUN kinase activity	426	0.201	1	1	4.5	0.222	1	24	0.0222	0.0417	1	11	48	unnamed	unnamed,unnamed,unnamed,unnamed,unnamed,unnamed,unnamed,unnamed,unnamed,unnamed,unnamed,unnamed,unnamed,unnamed,unnamed,unnamed,unnamed,unnamed,unnamed,unnamed,unnamed,unnamed,unnamed,unnamed	Tnfrsf11a	B230120H23Rik,Dab2ip,Dusp19,Gstp1,Hipk3,Irak1,Map3k7,Map4k2,Spag9,Tnfrsf11a,Tnfsf11
GO Biological Process	GO:0030511	positive regulation of transforming growth factor beta receptor signaling pathway	426	0.201	1	1	4.5	0.222	1	24	0.0222	0.0417	1	6	19	unnamed	unnamed,unnamed,unnamed,unnamed,unnamed,unnamed,unnamed,unnamed,unnamed,unnamed,unnamed,unnamed,unnamed,unnamed,unnamed,unnamed,unnamed,unnamed,unnamed,unnamed,unnamed,unnamed,unnamed,unnamed	Gipc1	Adam17,Gipc1,Hipk2,Npnt,Smad4,Stk11
GO Biological Process	GO:0006892	post-Golgi vesicle-mediated transport	426	0.201	1	1	4.5	0.222	1	24	0.0222	0.0417	1	5	18	unnamed	unnamed,unnamed,unnamed,unnamed,unnamed,unnamed,unnamed,unnamed,unnamed,unnamed,unnamed,unnamed,unnamed,unnamed,unnamed,unnamed,unnamed,unnamed,unnamed,unnamed,unnamed,unnamed,unnamed,unnamed	Mon2	Kif16b,Mon2,Optn,Rab14,Slc30a6
GO Biological Process	GO:0032368	regulation of lipid transport	426	0.201	1	1	4.5	0.222	1	24	0.0222	0.0417	1	12	41	unnamed	unnamed,unnamed,unnamed,unnamed,unnamed,unnamed,unnamed,unnamed,unnamed,unnamed,unnamed,unnamed,unnamed,unnamed,unnamed,unnamed,unnamed,unnamed,unnamed,unnamed,unnamed,unnamed,unnamed,unnamed	Tnfrsf11a	Abcg1,Abcg4,Akt2,Apoa1,Irak1,Irs2,Itgav,Lep,Nfkbia,Pon1,Tnfrsf11a,Tnfsf11
GO Biological Process	GO:0009991	response to extracellular stimulus	435	0.203	1	1	1.93	1.56	3	168	0.0667	0.0179	3	63	360	unnamed,unnamed,unnamed	unnamed,unnamed,unnamed,unnamed,unnamed,unnamed,unnamed,unnamed,unnamed,unnamed,unnamed,unnamed,unnamed,unnamed,unnamed,unnamed,unnamed,unnamed,unnamed,unnamed,unnamed,unnamed,unnamed,unnamed,unnamed,unnamed,unnamed,unnamed,unnamed,unnamed,unnamed,unnamed,unnamed,unnamed,unnamed,unnamed,unnamed,unnamed,unnamed,unnamed,unnamed,unnamed,unnamed,unnamed,unnamed,unnamed,unnamed,unnamed,unnamed,unnamed…	Brca1,Dusp1,Il6st	Acat1,Adnp2,Aes,Asgr1,Asns,Atg4b,Atg7,Bcl2,Bdh1,Bmpr2,Brca1,Ccnd1,Chrna7,Clk2,Cps1,Cyp26b1,Cyp27b1,Dusp1,Fzd1,Ghrl,Grin2b,Gstp1,Hmbs,Hmgcr,Il6st,Irf1,Itgb1,Klf4,Lep,Lrp6,Ltc4s,Lyn,Mll5,Mpo,Mtap1b,Mtap7,Ncoa1,Nrf1,Ntrk3,Osr1,Pax2,Pfkfb1,Pik3c3,Prkaa2,Psen1,Ptk6,Rb1cc1,Rps6kb1,Serpinc1,Slc18a2,Slc1a2,Slc39a5,Sod1,Spp1,Stc2,Tgfb2,Timp3,Tnrc6a,Tspo,Ulk2,Vcam1,Vldlr,Wipi2
GO Biological Process	GO:0060548	negative regulation of cell death	436	0.207	1	1	1.7	2.35	4	254	0.0889	0.0157	4	114	492	unnamed,unnamed,unnamed,unnamed	unnamed,unnamed,unnamed,unnamed,unnamed,unnamed,unnamed,unnamed,unnamed,unnamed,unnamed,unnamed,unnamed,unnamed,unnamed,unnamed,unnamed,unnamed,unnamed,unnamed,unnamed,unnamed,unnamed,unnamed,unnamed,unnamed,unnamed,unnamed,unnamed,unnamed,unnamed,unnamed,unnamed,unnamed,unnamed,unnamed,unnamed,unnamed,unnamed,unnamed,unnamed,unnamed,unnamed,unnamed,unnamed,unnamed,unnamed,unnamed,unnamed,unnamed…	Hspa1b,Mdm4,Nefl,Sncb	AK028549,Adam17,Adam8,Adar,Adnp2,Agap2,Ahr,Akt2,Apc,Ar,Arhgap10,Arnt2,Asns,Atg7,Atm,Aven,Bag1,Bag3,Barhl1,Bcl10,Bcl2,Bcl2l10,Bhlhe23,Bmp7,Bnip3,Braf,Cbl,Cd44,Cdkn1b,Chst11,Cln8,Ctnnb1,Cx3cl1,Cyr61,Eef1a2,Fgfr3,Fn1,Fnta,Foxs1,Gclc,Gclm,Ghrl,Glo1,Grik2,Grin1,Gstp1,Hgf,Hipk2,Hipk3,Hspa1b,Hspb1,Hspd1,Htt,Irs2,Itgav,Lep,Lhx3,Lhx4,Lrp6,Map3k7,Mapk8,Mdm4,Mkl1,Msh2,Naip1,Nefl,Nkx2-5,Ntrk3,Osr1,Pax2,Pax8,…
GO Biological Process	GO:0043154	negative regulation of caspase activity	437	0.208	1	1	4.32	0.231	1	25	0.0222	0.04	1	11	47	unnamed	unnamed,unnamed,unnamed,unnamed,unnamed,unnamed,unnamed,unnamed,unnamed,unnamed,unnamed,unnamed,unnamed,unnamed,unnamed,unnamed,unnamed,unnamed,unnamed,unnamed,unnamed,unnamed,unnamed,unnamed,unnamed	Hspa1b	Akt2,Arrb1,Hspa1b,Naip1,Pax2,Prdx5,Rps6ka3,Sfn,Usp47,Vil1,Xiap
GO Biological Process	GO:0006874	cellular calcium ion homeostasis	438	0.209	1	1	2.35	0.852	2	92	0.0444	0.0217	2	43	176	unnamed,unnamed	unnamed,unnamed,unnamed,unnamed,unnamed,unnamed,unnamed,unnamed,unnamed,unnamed,unnamed,unnamed,unnamed,unnamed,unnamed,unnamed,unnamed,unnamed,unnamed,unnamed,unnamed,unnamed,unnamed,unnamed,unnamed,unnamed,unnamed,unnamed,unnamed,unnamed,unnamed,unnamed,unnamed,unnamed,unnamed,unnamed,unnamed,unnamed,unnamed,unnamed,unnamed,unnamed,unnamed,unnamed,unnamed,unnamed,unnamed,unnamed,unnamed,unnamed…	Il6st,S100b	App,Atp2a2,Bcl2,Calca,Ccdc109a,Cherp,Clstn1,Cul5,Cxcl13,Drd2,Efhc1,Fkbp1a,Galr2,Ghrl,Grik2,Grin1,Hcrt,Htr2a,Il6st,Itgav,Itgb1,Jph2,Kcna5,Mchr1,Ndn,Pde6a,Pkd2,Plcg2,Pln,Prkca,Prkce,Psen1,Ryr2,Ryr3,S100b,Slc24a3,Slc8a3,Stim2,Sv2a,Tac1,Tgfa,Uts2,Wfs1
GO Biological Process	GO:0044255	cellular lipid metabolic process	439	0.213	1	1	1.68	2.38	4	257	0.0889	0.0156	4	128	582	unnamed,unnamed,unnamed,unnamed	unnamed,unnamed,unnamed,unnamed,unnamed,unnamed,unnamed,unnamed,unnamed,unnamed,unnamed,unnamed,unnamed,unnamed,unnamed,unnamed,unnamed,unnamed,unnamed,unnamed,unnamed,unnamed,unnamed,unnamed,unnamed,unnamed,unnamed,unnamed,unnamed,unnamed,unnamed,unnamed,unnamed,unnamed,unnamed,unnamed,unnamed,unnamed,unnamed,unnamed,unnamed,unnamed,unnamed,unnamed,unnamed,unnamed,unnamed,unnamed,unnamed,unnamed…	Brca1,Cwh43,Il6st,Pik3c2b	2810405K02Rik,Abhd5,Acsl6,Adipor1,Agk,Agpat3,Agpat5,Akr1b7,Aldh5a1,Aoah,Apoa1,Asah2,B4galt6,Bbs1,Brca1,Cbr4,Cdipt,Cds1,Cercam,Chka,Cln8,Col4a3bp,Cps1,Cpt1c,Cwh43,Cyp26b1,Cyp26c1,Cyp2d22,Decr1,Dld,Dolk,Dpm1,Drd2,Elovl4,Elovl5,Elovl7,Fa2h,Fabp3,Fads2,Fads3,Fads6,Far1,G6pc,Galr2,Ggps1,Ggt5,Glt25d1,Glt25d2,Gne,Hadh,Hao1,Hmgcr,Htr2a,Idi2,Il6st,Ip6k2,Itgb8,Kdsr,Lass4,Lass6,Lep,Lias,Lpcat1,Lpcat4,Lpgat1…
GO Biological Process	GO:0045685	regulation of glial cell differentiation	440	0.215	1	1	4.15	0.241	1	26	0.0222	0.0385	1	9	47	unnamed	unnamed,unnamed,unnamed,unnamed,unnamed,unnamed,unnamed,unnamed,unnamed,unnamed,unnamed,unnamed,unnamed,unnamed,unnamed,unnamed,unnamed,unnamed,unnamed,unnamed,unnamed,unnamed,unnamed,unnamed,unnamed,unnamed	Il6st	Cntn2,Ctnnb1,Fgfr3,Hes1,Hes5,Id4,Il6st,Ntrk3,Tcf7l2
GO Biological Process	GO:0051588	regulation of neurotransmitter transport	440	0.215	1	1	4.15	0.241	1	26	0.0222	0.0385	1	10	36	unnamed	unnamed,unnamed,unnamed,unnamed,unnamed,unnamed,unnamed,unnamed,unnamed,unnamed,unnamed,unnamed,unnamed,unnamed,unnamed,unnamed,unnamed,unnamed,unnamed,unnamed,unnamed,unnamed,unnamed,unnamed,unnamed,unnamed	Gfap	Drd2,Gfap,Hcrt,Kcnc4,Nat8l,Nos1,Ntrk2,Pfn2,Slc18a1,Slc18a2
GO Biological Process	GO:0046890	regulation of lipid biosynthetic process	440	0.215	1	1	4.15	0.241	1	26	0.0222	0.0385	1	14	85	unnamed	unnamed,unnamed,unnamed,unnamed,unnamed,unnamed,unnamed,unnamed,unnamed,unnamed,unnamed,unnamed,unnamed,unnamed,unnamed,unnamed,unnamed,unnamed,unnamed,unnamed,unnamed,unnamed,unnamed,unnamed,unnamed,unnamed	Brca1	Abcg1,Abcg4,Brca1,Cyp7a1,Cyr61,Dkk3,Fitm2,Lep,Pdgfa,Pxmp3,Sf1,Slc27a1,Sod1,Tspo
GO Biological Process	GO:0032890	regulation of organic acid transport	440	0.215	1	1	4.15	0.241	1	26	0.0222	0.0385	1	7	22	unnamed	unnamed,unnamed,unnamed,unnamed,unnamed,unnamed,unnamed,unnamed,unnamed,unnamed,unnamed,unnamed,unnamed,unnamed,unnamed,unnamed,unnamed,unnamed,unnamed,unnamed,unnamed,unnamed,unnamed,unnamed,unnamed,unnamed	Tnfrsf11a	Akt2,Gabbr1,Irs2,Lep,Tnfrsf11a,Tnfsf11,Trh
GO Biological Process	GO:0031330	negative regulation of cellular catabolic process	440	0.215	1	1	4.15	0.241	1	26	0.0222	0.0385	1	8	34	unnamed	unnamed,unnamed,unnamed,unnamed,unnamed,unnamed,unnamed,unnamed,unnamed,unnamed,unnamed,unnamed,unnamed,unnamed,unnamed,unnamed,unnamed,unnamed,unnamed,unnamed,unnamed,unnamed,unnamed,unnamed,unnamed,unnamed	Gipc1	Ddit4,Gipc1,Hdac4,N4bp1,Pabpc1,Ptpn3,Timp3,Usp44
GO Biological Process	GO:0006261	DNA-dependent DNA replication	440	0.215	1	1	4.15	0.241	1	26	0.0222	0.0385	1	6	45	unnamed	unnamed,unnamed,unnamed,unnamed,unnamed,unnamed,unnamed,unnamed,unnamed,unnamed,unnamed,unnamed,unnamed,unnamed,unnamed,unnamed,unnamed,unnamed,unnamed,unnamed,unnamed,unnamed,unnamed,unnamed,unnamed,unnamed	Tipin	C77370,Mcm7,Pura,Purb,Tipin,Tonsl
GO Biological Process	GO:0006302	double-strand break repair	440	0.215	1	1	4.15	0.241	1	26	0.0222	0.0385	1	15	70	unnamed	unnamed,unnamed,unnamed,unnamed,unnamed,unnamed,unnamed,unnamed,unnamed,unnamed,unnamed,unnamed,unnamed,unnamed,unnamed,unnamed,unnamed,unnamed,unnamed,unnamed,unnamed,unnamed,unnamed,unnamed,unnamed,unnamed	Brca1	Baz1b,Brca1,Gm5136,Ino80,Mlh1,Msh2,Rad52,Rnf168,Setx,Smarca5,Sod1,Tonsl,Ube2n,Vcp,Yy1
GO Biological Process	GO:0048584	positive regulation of response to stimulus	447	0.216	1	1	1.56	3.21	5	347	0.111	0.0144	6	141	743	unnamed,unnamed,unnamed,unnamed,unnamed	unnamed,unnamed,unnamed,unnamed,unnamed,unnamed,unnamed,unnamed,unnamed,unnamed,unnamed,unnamed,unnamed,unnamed,unnamed,unnamed,unnamed,unnamed,unnamed,unnamed,unnamed,unnamed,unnamed,unnamed,unnamed,unnamed,unnamed,unnamed,unnamed,unnamed,unnamed,unnamed,unnamed,unnamed,unnamed,unnamed,unnamed,unnamed,unnamed,unnamed,unnamed,unnamed,unnamed,unnamed,unnamed,unnamed,unnamed,unnamed,unnamed,unnamed…	Brca1,Gipc1,Il31ra,Il6st,S100b,Tnfrsf11a	Acvr1b,Adam17,Adam8,Afap1l2,Agap2,Akt2,Ar,Arl2bp,Arrb1,Atm,BC096441,Bcl10,Bcl2,Bmp7,Bmpr1a,Bmpr2,Braf,Brca1,C5ar1,C6,Cacnb3,Cadm1,Cbl,Cd44,Cdon,Cntn2,Crhr2,Crtam,Ctnnb1,Cx3cl1,Cxcl13,Cyp27b1,Cyr61,Dgki,Drd2,Dusp19,Eda,Exoc4,Fasl,Fcnb,Fgf18,Fgf9,Fgfbp3,Fgfr3,Foxd1,Fyn,Ghrl,Gipc1,Gm5136,Golph3,Grm5,H2-K1,Hcls1,Hes1,Hes5,Hipk2,Hspd1,Ikbke,Il31ra,Il6st,Irak1,Itgb1,Kras,Lancl2,Lax1,Lep,Lrp6,Lyn,Map3k7…
GO Biological Process	GO:0009416	response to light stimulus	448	0.216	1	1	2.3	0.87	2	94	0.0444	0.0213	2	37	160	unnamed,unnamed	unnamed,unnamed,unnamed,unnamed,unnamed,unnamed,unnamed,unnamed,unnamed,unnamed,unnamed,unnamed,unnamed,unnamed,unnamed,unnamed,unnamed,unnamed,unnamed,unnamed,unnamed,unnamed,unnamed,unnamed,unnamed,unnamed,unnamed,unnamed,unnamed,unnamed,unnamed,unnamed,unnamed,unnamed,unnamed,unnamed,unnamed,unnamed,unnamed,unnamed,unnamed,unnamed,unnamed,unnamed,unnamed,unnamed,unnamed,unnamed,unnamed,unnamed…	Dusp1,Tipin	App,Arrb1,Asns,Atp1a3,Atxn1,Bcl2,Brsk1,Cacna1e,Ccnd1,Chek1,Drd2,Dusp1,Ercc3,Grin1,Grin2a,Hmgcr,Htt,Ino80,Junb,Kras,Mapk8,Mat2a,Msh2,Neto1,Nlgn3,Opn1sw,Opn5,Polh,Rad18,Rev1,Slc1a2,Tipin,Trim32,Ube2a,Ube2b,Usp47,Yy1
GO Biological Process	GO:0043170	macromolecule metabolic process	449	0.217	1	1	1.16	19.9	23	2150	0.511	0.0107	19	1068	5386	unnamed,unnamed,unnamed,unnamed,unnamed,unnamed,unnamed,unnamed,unnamed,unnamed,unnamed,unnamed,unnamed,unnamed,unnamed,unnamed,unnamed,unnamed,unnamed,unnamed,unnamed,unnamed,unnamed	unnamed,unnamed,unnamed,unnamed,unnamed,unnamed,unnamed,unnamed,unnamed,unnamed,unnamed,unnamed,unnamed,unnamed,unnamed,unnamed,unnamed,unnamed,unnamed,unnamed,unnamed,unnamed,unnamed,unnamed,unnamed,unnamed,unnamed,unnamed,unnamed,unnamed,unnamed,unnamed,unnamed,unnamed,unnamed,unnamed,unnamed,unnamed,unnamed,unnamed,unnamed,unnamed,unnamed,unnamed,unnamed,unnamed,unnamed,unnamed,unnamed,unnamed…	Brca1,Chfr,Cwh43,Dach1,Dis3l,Dnajb1,Dusp1,Eif4h,Ell3,Gak,Hipk4,Hspa1b,Ide,Il6st,Limk1,Mafg,March5,Thoc3,Tipin	1500010J02Rik,1500015O10Rik,2310003H01Rik,2410022L05Rik,2510012J08Rik,2610101N10Rik,2700078E11Rik,4921515J06Rik,4930444G20Rik,A1cf,AF366264,AI314180,AK028549,Aarsd1,Aasdhppt,Abcg1,Abhd5,Acan,Acr,Acvr1b,Adad2,Adam17,Adam19,Adam23,Adam33,Adam8,Adamts19,Adamts3,Adamts4,Adar,Adat1,Adat2,Adnp2,Adrb1,Adrbk1,Aes,Aff2,Aff3,Afg3l1,Afg3l2,Agtpbp1,Ahr,Ahsa1,Akt2,Akt3,Alkbh2,Alkbh3,Alkbh8,Alpk2,Amz1,Anapc1,A…
GO Biological Process	GO:0072503	cellular divalent inorganic cation homeostasis	450	0.219	1	1	2.27	0.88	2	95	0.0444	0.0211	2	45	185	unnamed,unnamed	unnamed,unnamed,unnamed,unnamed,unnamed,unnamed,unnamed,unnamed,unnamed,unnamed,unnamed,unnamed,unnamed,unnamed,unnamed,unnamed,unnamed,unnamed,unnamed,unnamed,unnamed,unnamed,unnamed,unnamed,unnamed,unnamed,unnamed,unnamed,unnamed,unnamed,unnamed,unnamed,unnamed,unnamed,unnamed,unnamed,unnamed,unnamed,unnamed,unnamed,unnamed,unnamed,unnamed,unnamed,unnamed,unnamed,unnamed,unnamed,unnamed,unnamed…	Il6st,S100b	App,Atp2a2,Bcl2,Calca,Ccdc109a,Cherp,Clstn1,Cul5,Cxcl13,Drd2,Efhc1,Fkbp1a,Galr2,Ghrl,Grik2,Grin1,Hcrt,Htr2a,Il6st,Itgav,Itgb1,Jph2,Kcna5,Mchr1,Mt1,Ndn,Pde6a,Pkd2,Plcg2,Pln,Prkca,Prkce,Psen1,Ryr2,Ryr3,S100b,Slc24a3,Slc39a5,Slc8a3,Stim2,Sv2a,Tac1,Tgfa,Uts2,Wfs1
GO Biological Process	GO:0006629	lipid metabolic process	451	0.221	1	1	1.54	3.24	5	350	0.111	0.0143	5	167	789	unnamed,unnamed,unnamed,unnamed,unnamed	unnamed,unnamed,unnamed,unnamed,unnamed,unnamed,unnamed,unnamed,unnamed,unnamed,unnamed,unnamed,unnamed,unnamed,unnamed,unnamed,unnamed,unnamed,unnamed,unnamed,unnamed,unnamed,unnamed,unnamed,unnamed,unnamed,unnamed,unnamed,unnamed,unnamed,unnamed,unnamed,unnamed,unnamed,unnamed,unnamed,unnamed,unnamed,unnamed,unnamed,unnamed,unnamed,unnamed,unnamed,unnamed,unnamed,unnamed,unnamed,unnamed,unnamed…	Brca1,Cwh43,Il6st,Pik3c2b,Pld3	2810405K02Rik,Abcg1,Abhd5,Acbd3,Acsl6,Adipor1,Agk,Agpat3,Agpat5,Agps,Akr1b7,Aldh5a1,Aoah,Apoa1,Asah1,Asah2,B4galt6,Bbs1,Bmpr1b,Brca1,Cbr4,Cdipt,Cds1,Cercam,Chka,Cln8,Col4a3bp,Cps1,Cpt1c,Crh,Cwh43,Cyp26b1,Cyp26c1,Cyp27b1,Cyp2d22,Cyp2r1,Cyp46a1,Cyp7a1,Cyp7b1,Daglb,Decr1,Dld,Dolk,Dpm1,Drd2,Ebpl,Elovl4,Elovl5,Elovl7,Enpp6,Fa2h,Fabp3,Fads2,Fads3,Fads6,Far1,Fdxr,G6pc,Galr2,Ggps1,Ggt5,Glt25d1,Glt25d2,Gn…
GO Biological Process	GO:0051412	response to corticosterone stimulus	452	0.223	1	1	4	0.25	1	27	0.0222	0.037	1	11	26	unnamed	unnamed,unnamed,unnamed,unnamed,unnamed,unnamed,unnamed,unnamed,unnamed,unnamed,unnamed,unnamed,unnamed,unnamed,unnamed,unnamed,unnamed,unnamed,unnamed,unnamed,unnamed,unnamed,unnamed,unnamed,unnamed,unnamed,unnamed	Nefl	Bcl2,Bdh1,Ccnd1,Junb,Nefl,Ntrk3,Pebp1,Prkca,Ptgs1,Slc18a2,Trh
GO Biological Process	GO:0061136	regulation of proteasomal protein catabolic process	452	0.223	1	1	4	0.25	1	27	0.0222	0.037	1	14	53	unnamed	unnamed,unnamed,unnamed,unnamed,unnamed,unnamed,unnamed,unnamed,unnamed,unnamed,unnamed,unnamed,unnamed,unnamed,unnamed,unnamed,unnamed,unnamed,unnamed,unnamed,unnamed,unnamed,unnamed,unnamed,unnamed,unnamed,unnamed	Gipc1	Btrc,Dyx1c1,Gclc,Gipc1,N4bp1,Nub1,Psen1,Rad23b,Rchy1,Stub1,Trib2,Uchl5,Usp44,Vcp
GO Biological Process	GO:0051054	positive regulation of DNA metabolic process	452	0.223	1	1	4	0.25	1	27	0.0222	0.037	1	15	83	unnamed	unnamed,unnamed,unnamed,unnamed,unnamed,unnamed,unnamed,unnamed,unnamed,unnamed,unnamed,unnamed,unnamed,unnamed,unnamed,unnamed,unnamed,unnamed,unnamed,unnamed,unnamed,unnamed,unnamed,unnamed,unnamed,unnamed,unnamed	Brca1	1500010J02Rik,Atf1,BC096441,Brca1,Gm5136,Ino80,Kras,Paxip1,Pdgfa,Pla2g1b,Rnf168,Tnks,Ube2b,Ube2n,Ucn
GO Biological Process	GO:0044419	interspecies interaction between organisms	452	0.223	1	1	4	0.25	1	27	0.0222	0.037	1	13	79	unnamed	unnamed,unnamed,unnamed,unnamed,unnamed,unnamed,unnamed,unnamed,unnamed,unnamed,unnamed,unnamed,unnamed,unnamed,unnamed,unnamed,unnamed,unnamed,unnamed,unnamed,unnamed,unnamed,unnamed,unnamed,unnamed,unnamed,unnamed	Thoc3	Bcl2l11,Cul1,Dag1,Itgav,Ntrk3,Pias4,Ripk1,Rraga,Thoc3,Thoc5,Tlr1,Vapb,Vcam1
GO Biological Process	GO:0043542	endothelial cell migration	452	0.223	1	1	4	0.25	1	27	0.0222	0.037	1	14	33	unnamed	unnamed,unnamed,unnamed,unnamed,unnamed,unnamed,unnamed,unnamed,unnamed,unnamed,unnamed,unnamed,unnamed,unnamed,unnamed,unnamed,unnamed,unnamed,unnamed,unnamed,unnamed,unnamed,unnamed,unnamed,unnamed,unnamed,unnamed	Gipc1	Adam8,Apoa1,Cxcl13,Efnb2,Gipc1,Gpr124,Hspb1,Itgav,Itgb1,Paxip1,Prkx,Robo1,Slit2,Vegfa
GO Biological Process	GO:0006096	glycolysis	452	0.223	1	1	4	0.25	1	27	0.0222	0.037	1	9	45	unnamed	unnamed,unnamed,unnamed,unnamed,unnamed,unnamed,unnamed,unnamed,unnamed,unnamed,unnamed,unnamed,unnamed,unnamed,unnamed,unnamed,unnamed,unnamed,unnamed,unnamed,unnamed,unnamed,unnamed,unnamed,unnamed,unnamed,unnamed	Gapdh	Gapdh,Gapdh,Gpi1,Hk1,Hkdc1,Pdhb,Pgam2,Pgk2,Pkm2
GO Biological Process	GO:0000278	mitotic cell cycle	458	0.229	1	1	1.81	1.66	3	179	0.0667	0.0168	2	81	351	unnamed,unnamed,unnamed	unnamed,unnamed,unnamed,unnamed,unnamed,unnamed,unnamed,unnamed,unnamed,unnamed,unnamed,unnamed,unnamed,unnamed,unnamed,unnamed,unnamed,unnamed,unnamed,unnamed,unnamed,unnamed,unnamed,unnamed,unnamed,unnamed,unnamed,unnamed,unnamed,unnamed,unnamed,unnamed,unnamed,unnamed,unnamed,unnamed,unnamed,unnamed,unnamed,unnamed,unnamed,unnamed,unnamed,unnamed,unnamed,unnamed,unnamed,unnamed,unnamed,unnamed…	Chfr,Tipin	4922501C03Rik,Adam17,Anapc1,Anapc16,Anapc7,Apc,App,Arhgef2,Arl8a,Arpp19,Aspm,Bcl2,Bod1,Brd4,C77370,Camk2d,Ccnd1,Ccnk,Ccny,Cdc6,Cdk14,Cdk5rap2,Cdkn1b,Chek1,Chfr,Cit,Cltc,Csnk1a1,Cul3,Dctn2,Dsn1,E2f1,Fam83d,Foxo4,Gpr132,Haus3,Haus8,Hspa2,Id4,Ino80,Insc,Itgb1,Kif2a,Kif3b,Klf11,Lmln,Lsm10,Lsm11,Mastl,Mau2,Mis12,Ncapd2,Nedd9,Nek1,Nek2,Nek4,Nfatc1,Nup43,Nusap1,Pds5a,Pim1,Pinx1,Plcb1,Pogz,Ppp2r2d,Ppp2r3…
GO Biological Process	GO:0055074	calcium ion homeostasis	459	0.23	1	1	2.2	0.907	2	98	0.0444	0.0204	2	45	184	unnamed,unnamed	unnamed,unnamed,unnamed,unnamed,unnamed,unnamed,unnamed,unnamed,unnamed,unnamed,unnamed,unnamed,unnamed,unnamed,unnamed,unnamed,unnamed,unnamed,unnamed,unnamed,unnamed,unnamed,unnamed,unnamed,unnamed,unnamed,unnamed,unnamed,unnamed,unnamed,unnamed,unnamed,unnamed,unnamed,unnamed,unnamed,unnamed,unnamed,unnamed,unnamed,unnamed,unnamed,unnamed,unnamed,unnamed,unnamed,unnamed,unnamed,unnamed,unnamed…	Il6st,S100b	App,Atp2a2,Bcl2,Calca,Ccdc109a,Cherp,Clstn1,Cul5,Cxcl13,Cyp27b1,Drd2,Efhc1,Fkbp1a,Galr2,Ghrl,Grik2,Grin1,Hcrt,Hrc,Htr2a,Il6st,Itgav,Itgb1,Jph2,Kcna5,Mchr1,Ndn,Pde6a,Pkd2,Plcg2,Pln,Prkca,Prkce,Psen1,Ryr2,Ryr3,S100b,Slc24a3,Slc8a3,Stim2,Sv2a,Tac1,Tgfa,Uts2,Wfs1
GO Biological Process	GO:0006644	phospholipid metabolic process	459	0.23	1	1	2.2	0.907	2	98	0.0444	0.0204	2	50	199	unnamed,unnamed	unnamed,unnamed,unnamed,unnamed,unnamed,unnamed,unnamed,unnamed,unnamed,unnamed,unnamed,unnamed,unnamed,unnamed,unnamed,unnamed,unnamed,unnamed,unnamed,unnamed,unnamed,unnamed,unnamed,unnamed,unnamed,unnamed,unnamed,unnamed,unnamed,unnamed,unnamed,unnamed,unnamed,unnamed,unnamed,unnamed,unnamed,unnamed,unnamed,unnamed,unnamed,unnamed,unnamed,unnamed,unnamed,unnamed,unnamed,unnamed,unnamed,unnamed…	Cwh43,Pik3c2b	Abhd5,Agpat3,Agpat5,Aldh5a1,Apoa1,Cdipt,Cds1,Chka,Cln8,Cwh43,Dpm1,Drd2,Fabp3,Galr2,Htr2a,Ip6k2,Lpcat1,Lpcat4,Lpgat1,Lyst,Mtm1,Oc90,Pcyt1a,Pcyt1b,Pgap2,Pigg,Pigm,Pign,Pigo,Pigs,Pik3c2b,Pik3c3,Pik3ca,Pik3cd,Pip4k2a,Pla2g1b,Pla2g2e,Pla2g4f,Plcb1,Plcg2,Plch2,Pld2,Pmvk,Pon1,Serinc4,Sgms2,Slc27a1,Smpd3,Sptlc2,Synj2
GO Biological Process	GO:0000226	microtubule cytoskeleton organization	459	0.23	1	1	2.2	0.907	2	98	0.0444	0.0204	3	50	179	unnamed,unnamed	unnamed,unnamed,unnamed,unnamed,unnamed,unnamed,unnamed,unnamed,unnamed,unnamed,unnamed,unnamed,unnamed,unnamed,unnamed,unnamed,unnamed,unnamed,unnamed,unnamed,unnamed,unnamed,unnamed,unnamed,unnamed,unnamed,unnamed,unnamed,unnamed,unnamed,unnamed,unnamed,unnamed,unnamed,unnamed,unnamed,unnamed,unnamed,unnamed,unnamed,unnamed,unnamed,unnamed,unnamed,unnamed,unnamed,unnamed,unnamed,unnamed,unnamed…	Brca1,Nefl,Nefm	Apc,Arhgef2,Bbs1,Bbs4,Bicd1,Brca1,Brsk1,Capn6,Cdc42bpa,Cdk5rap2,Cntn2,Ctnnb1,Dag1,Dctn2,Fert2,Fmn2,Gm16517,Haus3,Haus6,Haus8,Hdac3,Hook3,Ino80,Insc,Kif2a,Kif3b,Mark1,Mark4,Mlh1,Mtap1b,Mtap1s,Mtap7,Nav1,Nefh,Nefl,Nefm,Nek2,Neurl1a,Nusap1,Pcm1,Rhoa,Spast,Tbce,Tppp,Tppp3,Ttl,Tubb5,Tubgcp6,Ube2b,Zfp828
GO Biological Process	GO:0090068	positive regulation of cell cycle process	462	0.23	1	1	3.86	0.259	1	28	0.0222	0.0357	1	15	72	unnamed	unnamed,unnamed,unnamed,unnamed,unnamed,unnamed,unnamed,unnamed,unnamed,unnamed,unnamed,unnamed,unnamed,unnamed,unnamed,unnamed,unnamed,unnamed,unnamed,unnamed,unnamed,unnamed,unnamed,unnamed,unnamed,unnamed,unnamed,unnamed	Brca1	Brca1,Brd4,Cdc6,Cspp1,Ctgf,Cul4b,Nusap1,Pebp1,Plcb1,Plk4,Rhoa,Terf1,Tgfa,Ube2b,Ube2c
GO Biological Process	GO:2000602	regulation of interphase of mitotic cell cycle	462	0.23	1	1	3.86	0.259	1	28	0.0222	0.0357	1	14	69	unnamed	unnamed,unnamed,unnamed,unnamed,unnamed,unnamed,unnamed,unnamed,unnamed,unnamed,unnamed,unnamed,unnamed,unnamed,unnamed,unnamed,unnamed,unnamed,unnamed,unnamed,unnamed,unnamed,unnamed,unnamed,unnamed,unnamed,unnamed,unnamed	Tipin	Apbb2,Brd4,Ccnd1,Cul4b,E2f1,Fbxo31,Foxo4,Ino80,Kras,Myo16,Pura,Tipin,Usp47,Zc3h12d
GO Biological Process	GO:0000188	inactivation of MAPK activity	462	0.23	1	1	3.86	0.259	1	28	0.0222	0.0357	1	10	18	unnamed	unnamed,unnamed,unnamed,unnamed,unnamed,unnamed,unnamed,unnamed,unnamed,unnamed,unnamed,unnamed,unnamed,unnamed,unnamed,unnamed,unnamed,unnamed,unnamed,unnamed,unnamed,unnamed,unnamed,unnamed,unnamed,unnamed,unnamed,unnamed	Dusp1	Dusp1,Dusp19,Dusp3,Dusp4,Dusp8,Dusp9,Lax1,Prkca,Spred1,Spred2
GO Biological Process	GO:0048678	response to axon injury	462	0.23	1	1	3.86	0.259	1	28	0.0222	0.0357	1	12	42	unnamed	unnamed,unnamed,unnamed,unnamed,unnamed,unnamed,unnamed,unnamed,unnamed,unnamed,unnamed,unnamed,unnamed,unnamed,unnamed,unnamed,unnamed,unnamed,unnamed,unnamed,unnamed,unnamed,unnamed,unnamed,unnamed,unnamed,unnamed,unnamed	Nefl	Arf4,Bcl2,Drd2,Fgfr3,Ltc4s,Lyn,Mtap1b,Nefl,Ntrk3,Sod1,Tspo,Uck2
GO Biological Process	GO:0044265	cellular macromolecule catabolic process	466	0.231	1	1	1.62	2.46	4	266	0.0889	0.015	3	105	373	unnamed,unnamed,unnamed,unnamed	unnamed,unnamed,unnamed,unnamed,unnamed,unnamed,unnamed,unnamed,unnamed,unnamed,unnamed,unnamed,unnamed,unnamed,unnamed,unnamed,unnamed,unnamed,unnamed,unnamed,unnamed,unnamed,unnamed,unnamed,unnamed,unnamed,unnamed,unnamed,unnamed,unnamed,unnamed,unnamed,unnamed,unnamed,unnamed,unnamed,unnamed,unnamed,unnamed,unnamed,unnamed,unnamed,unnamed,unnamed,unnamed,unnamed,unnamed,unnamed,unnamed,unnamed…	Chfr,Dis3l,Hspa1b	1500015O10Rik,2700078E11Rik,AI314180,Acr,Arih1,Arrb1,Atm,Bnip3,Btrc,C77370,Chfr,Cln8,Cul1,Cul3,Cul4b,Cul5,Cul7,Cyld,Dcp1b,Dcp2,Dis3l,Dnajb9,Dnajc3,Drosha,Edem1,Edem3,Eif2c1,Eif2c3,Erlec1,Erlin2,Fbxl12,Fbxo2,Fbxo31,Fbxw11,Hace1,Hecw2,Hspa1b,Isg20,Jkamp,Kctd10,Lsm1,Mlh1,Nanos2,Ncbp2,Nedd4l,Nit1,Nub1,Os9,Pabpc1,Parn,Pcnp,Pcyox1,Ppp2ca,Psma3,Psma6,Psmb2,Psmb4,Psmb6,Rad23b,Rbbp6,Rbck1,Rc3h1,Rchy1,Rnas…
GO Biological Process	GO:0008284	positive regulation of cell proliferation	466	0.231	1	1	1.62	2.46	4	266	0.0889	0.015	5	101	513	unnamed,unnamed,unnamed,unnamed	unnamed,unnamed,unnamed,unnamed,unnamed,unnamed,unnamed,unnamed,unnamed,unnamed,unnamed,unnamed,unnamed,unnamed,unnamed,unnamed,unnamed,unnamed,unnamed,unnamed,unnamed,unnamed,unnamed,unnamed,unnamed,unnamed,unnamed,unnamed,unnamed,unnamed,unnamed,unnamed,unnamed,unnamed,unnamed,unnamed,unnamed,unnamed,unnamed,unnamed,unnamed,unnamed,unnamed,unnamed,unnamed,unnamed,unnamed,unnamed,unnamed,unnamed…	Gfap,Il31ra,Il6st,Mdm4,Tipin	AK028549,Adam17,Agap2,Ar,Arhgap5,Arnt2,Atf3,BC096441,Bcl2,Bmpr1a,Bmpr2,Ccnd1,Ccnd2,Cd276,Cd80,Cdca7l,Cdkn1b,Cdon,Ctgf,Ctnnb1,Cx3cl1,Cyp7b1,Cyr61,Dlg1,Drd2,E2f1,E2f3,Eapp,Epcam,Etv5,Fasl,Fgf18,Fgf9,Fgfr3,Fnta,Foxe3,Foxf1a,Gab2,Gfap,Hcls1,Hdac4,Hes1,Hes5,Hipk2,Hoxa3,Htr2a,Icosl,Id4,Il31ra,Il6st,Irs2,Itgav,Itgb1,Klf5,Kras,Lep,Lifr,Lrp6,Lyn,Mab21l1,Mdm4,Nacc1,Nampt,Nck1,Ndufs4,Nkx2-5,Nodal,Osr1,Pax3,…
GO Biological Process	GO:0033036	macromolecule localization	468	0.233	1	1	1.35	5.92	8	639	0.178	0.0125	5	272	1165	unnamed,unnamed,unnamed,unnamed,unnamed,unnamed,unnamed,unnamed	unnamed,unnamed,unnamed,unnamed,unnamed,unnamed,unnamed,unnamed,unnamed,unnamed,unnamed,unnamed,unnamed,unnamed,unnamed,unnamed,unnamed,unnamed,unnamed,unnamed,unnamed,unnamed,unnamed,unnamed,unnamed,unnamed,unnamed,unnamed,unnamed,unnamed,unnamed,unnamed,unnamed,unnamed,unnamed,unnamed,unnamed,unnamed,unnamed,unnamed,unnamed,unnamed,unnamed,unnamed,unnamed,unnamed,unnamed,unnamed,unnamed,unnamed…	Gipc1,March5,Mon2,Mzt1,Thoc3	Abcg1,Agap1,Akap10,Akap4,Ank2,Ankrd13c,Ap1g1,Ap1m1,Ap1s1,Ap1s2,Ap1s3,Ap2m1,Ap3m1,Ap4s1,Apba1,Apba2,Apoa1,Apold1,Apom,Appbp2,Arap1,Arcn1,Arf1,Arf3,Arf4,Arf6,Arfgap3,Arl2bp,Arrb1,Atg4b,Atg7,Atp10a,Atp8a2,Atp9b,Axin2,Bbs4,Bicd1,Bmp7,Bnip1,Cacnb1,Cep57,Chmp2a,Chmp4c,Chst11,Clk2,Clta,Cltc,Cntn2,Cog3,Col4a3bp,Cope,Cse1l,Ctnnb1,Cuta,Dag1,Ddx19a,Ddx25,Dlg1,Dlg4,Drd2,Dync2h1,Egr2,Eps15,Erbb2ip,Ercc3,Exoc4…
GO Biological Process	GO:0005977	glycogen metabolic process	469	0.237	1	1	3.72	0.269	1	29	0.0222	0.0345	1	11	41	unnamed	unnamed,unnamed,unnamed,unnamed,unnamed,unnamed,unnamed,unnamed,unnamed,unnamed,unnamed,unnamed,unnamed,unnamed,unnamed,unnamed,unnamed,unnamed,unnamed,unnamed,unnamed,unnamed,unnamed,unnamed,unnamed,unnamed,unnamed,unnamed,unnamed	Il6st	Adrb1,Akt2,Cps1,Epm2a,G6pc,Gnmt,Il6st,Phkb,Ppp1cb,Ppp1r3e,Ppp3r2
GO Biological Process	GO:0080135	regulation of cellular response to stress	470	0.24	1	1	2.14	0.935	2	101	0.0444	0.0198	2	41	180	unnamed,unnamed	unnamed,unnamed,unnamed,unnamed,unnamed,unnamed,unnamed,unnamed,unnamed,unnamed,unnamed,unnamed,unnamed,unnamed,unnamed,unnamed,unnamed,unnamed,unnamed,unnamed,unnamed,unnamed,unnamed,unnamed,unnamed,unnamed,unnamed,unnamed,unnamed,unnamed,unnamed,unnamed,unnamed,unnamed,unnamed,unnamed,unnamed,unnamed,unnamed,unnamed,unnamed,unnamed,unnamed,unnamed,unnamed,unnamed,unnamed,unnamed,unnamed,unnamed…	Brca1,Tnfrsf11a	Akt2,Atm,Axin2,B230120H23Rik,Brca1,Cd44,Chek1,Cops5,Dab2ip,Dusp19,Dusp3,Fbln5,Fktn,Gm5136,Grik2,Gstp1,Hdac3,Hipk2,Hipk3,Irak1,Lyn,Map3k7,Map4k2,Mapk8ip2,Nod1,Ntrk3,Nuak1,Plcb1,Ppp4r2,Prdx1,Rnf168,Sh3rf1,Spag9,Spp1,Taok3,Tnfrsf11a,Tnfsf11,Tnr,Tpd52l1,Traf4,Ube2n
GO Biological Process	GO:0072507	divalent inorganic cation homeostasis	470	0.24	1	1	2.14	0.935	2	101	0.0444	0.0198	2	47	194	unnamed,unnamed	unnamed,unnamed,unnamed,unnamed,unnamed,unnamed,unnamed,unnamed,unnamed,unnamed,unnamed,unnamed,unnamed,unnamed,unnamed,unnamed,unnamed,unnamed,unnamed,unnamed,unnamed,unnamed,unnamed,unnamed,unnamed,unnamed,unnamed,unnamed,unnamed,unnamed,unnamed,unnamed,unnamed,unnamed,unnamed,unnamed,unnamed,unnamed,unnamed,unnamed,unnamed,unnamed,unnamed,unnamed,unnamed,unnamed,unnamed,unnamed,unnamed,unnamed…	Il6st,S100b	App,Atp2a2,Bcl2,Calca,Ccdc109a,Cherp,Clstn1,Cul5,Cxcl13,Cyp27b1,Drd2,Efhc1,Fkbp1a,Galr2,Ghrl,Grik2,Grin1,Hcrt,Hrc,Htr2a,Il6st,Itgav,Itgb1,Jph2,Kcna5,Mchr1,Mt1,Ndn,Pde6a,Pkd2,Plcg2,Pln,Prkca,Prkce,Psen1,Ryr2,Ryr3,S100b,Slc24a3,Slc39a5,Slc8a3,Stim2,Sv2a,Tac1,Tgfa,Uts2,Wfs1
GO Biological Process	GO:0001666	response to hypoxia	470	0.24	1	1	2.14	0.935	2	101	0.0444	0.0198	2	42	212	unnamed,unnamed	unnamed,unnamed,unnamed,unnamed,unnamed,unnamed,unnamed,unnamed,unnamed,unnamed,unnamed,unnamed,unnamed,unnamed,unnamed,unnamed,unnamed,unnamed,unnamed,unnamed,unnamed,unnamed,unnamed,unnamed,unnamed,unnamed,unnamed,unnamed,unnamed,unnamed,unnamed,unnamed,unnamed,unnamed,unnamed,unnamed,unnamed,unnamed,unnamed,unnamed,unnamed,unnamed,unnamed,unnamed,unnamed,unnamed,unnamed,unnamed,unnamed,unnamed…	Mdm4,mt-Nd4	Adam17,Adam8,Apold1,Arnt2,Atm,Atp1b1,Bcl2,Bnip3,Cx3cl1,Ddit4,Drd2,E2f1,Egln1,Epas1,Ercc3,Hmbs,Kcna5,Kcnma1,Lep,Mb,Mdm4,Mlh1,Mmp13,Mt3,Nos1,Nppc,Nrf1,Pld2,Prkce,Ryr2,Ryr3,Smad4,Smad9,Sod3,Stc2,Trh,Ube2b,Uts2,Vcam1,Vegfa,Vldlr,mt-Nd4
GO Biological Process	GO:0009967	positive regulation of signal transduction	473	0.241	1	1	1.59	2.51	4	271	0.0889	0.0148	5	104	517	unnamed,unnamed,unnamed,unnamed	unnamed,unnamed,unnamed,unnamed,unnamed,unnamed,unnamed,unnamed,unnamed,unnamed,unnamed,unnamed,unnamed,unnamed,unnamed,unnamed,unnamed,unnamed,unnamed,unnamed,unnamed,unnamed,unnamed,unnamed,unnamed,unnamed,unnamed,unnamed,unnamed,unnamed,unnamed,unnamed,unnamed,unnamed,unnamed,unnamed,unnamed,unnamed,unnamed,unnamed,unnamed,unnamed,unnamed,unnamed,unnamed,unnamed,unnamed,unnamed,unnamed,unnamed…	Gipc1,Il31ra,Il6st,S100b,Tnfrsf11a	Acvr1b,Adam17,Adam8,Afap1l2,Agap2,Akt2,Ar,Arl2bp,Arrb1,Atm,Bcl10,Bmp7,Bmpr1a,Bmpr2,Braf,Cbl,Cd44,Cdon,Cntn2,Crhr2,Ctnnb1,Cyp27b1,Cyr61,Dgki,Drd2,Dusp19,Eda,Exoc4,Fasl,Fgf18,Fgf9,Fgfbp3,Fgfr3,Foxd1,Gipc1,Golph3,Grm5,Hcls1,Hes1,Hes5,Hipk2,Ikbke,Il31ra,Il6st,Itgb1,Kras,Lancl2,Lep,Lrp6,Lyn,Map3k7,Map4k2,Mapk8ip2,Mapksp1,Mbd2,Ncoa3,Ndfip1,Nenf,Nod1,Notch2,Npnt,Nrg1,P2rx4,Pdgfa,Pebp1,Pink1,Plcb1,Pld2,P…
GO Biological Process	GO:0043405	regulation of MAP kinase activity	474	0.243	1	1	2.12	0.944	2	102	0.0444	0.0196	2	44	167	unnamed,unnamed	unnamed,unnamed,unnamed,unnamed,unnamed,unnamed,unnamed,unnamed,unnamed,unnamed,unnamed,unnamed,unnamed,unnamed,unnamed,unnamed,unnamed,unnamed,unnamed,unnamed,unnamed,unnamed,unnamed,unnamed,unnamed,unnamed,unnamed,unnamed,unnamed,unnamed,unnamed,unnamed,unnamed,unnamed,unnamed,unnamed,unnamed,unnamed,unnamed,unnamed,unnamed,unnamed,unnamed,unnamed,unnamed,unnamed,unnamed,unnamed,unnamed,unnamed…	Dusp1,Tnfrsf11a	Adam8,B230120H23Rik,Bmp7,Dab2ip,Dusp1,Dusp19,Dusp3,Dusp4,Dusp8,Dusp9,Efna1,Frs2,Ghrl,Grm1,Gstp1,Hgf,Hipk3,Hmgcr,Htr2a,Irak1,Lax1,Map2k6,Map3k5,Map3k7,Map4k2,Pdgfa,Plce1,Prdx2,Prkca,Psen1,Rgs2,Sod1,Spag9,Spred1,Spred2,Spry2,Spry4,Stk38,Tgfa,Tnfrsf11a,Tnfsf11,Tpd52l1,Trib2,Vegfa
GO Biological Process	GO:0034097	response to cytokine stimulus	474	0.243	1	1	2.12	0.944	2	102	0.0444	0.0196	2	42	303	unnamed,unnamed	unnamed,unnamed,unnamed,unnamed,unnamed,unnamed,unnamed,unnamed,unnamed,unnamed,unnamed,unnamed,unnamed,unnamed,unnamed,unnamed,unnamed,unnamed,unnamed,unnamed,unnamed,unnamed,unnamed,unnamed,unnamed,unnamed,unnamed,unnamed,unnamed,unnamed,unnamed,unnamed,unnamed,unnamed,unnamed,unnamed,unnamed,unnamed,unnamed,unnamed,unnamed,unnamed,unnamed,unnamed,unnamed,unnamed,unnamed,unnamed,unnamed,unnamed…	Il6st,Tnfrsf11a	Aqp4,Bcl2,Ctnnb1,Cx3cl1,Cxcl13,Cyp27b1,Dab2ip,Fkbp1a,Fnta,Foxf1a,G630025P09Rik,Gch1,Gm614,Gnao1,Grin2b,Hdac4,Hmbs,Il12rb2,Il18bp,Il5ra,Il6st,Irak1,Irf1,Junb,Lep,Lifr,Pggt1b,Plcb1,Prkca,Ripk1,Rps6ka5,Rps6kb1,Rqcd1,Slc27a1,Stat1,Tgfb2,Tnfrsf11a,Tnfsf11,Traf3,Trim32,Vldlr,Zc3h15
GO Biological Process	GO:0034612	response to tumor necrosis factor	476	0.244	1	1	3.6	0.278	1	30	0.0222	0.0333	1	11	56	unnamed	unnamed,unnamed,unnamed,unnamed,unnamed,unnamed,unnamed,unnamed,unnamed,unnamed,unnamed,unnamed,unnamed,unnamed,unnamed,unnamed,unnamed,unnamed,unnamed,unnamed,unnamed,unnamed,unnamed,unnamed,unnamed,unnamed,unnamed,unnamed,unnamed,unnamed	Tnfrsf11a	Cyp27b1,Dab2ip,Gch1,Il18bp,Irf1,Ripk1,Rps6kb1,Tnfrsf11a,Tnfsf11,Traf3,Trim32
GO Biological Process	GO:0051592	response to calcium ion	476	0.244	1	1	3.6	0.278	1	30	0.0222	0.0333	1	15	73	unnamed	unnamed,unnamed,unnamed,unnamed,unnamed,unnamed,unnamed,unnamed,unnamed,unnamed,unnamed,unnamed,unnamed,unnamed,unnamed,unnamed,unnamed,unnamed,unnamed,unnamed,unnamed,unnamed,unnamed,unnamed,unnamed,unnamed,unnamed,unnamed,unnamed,unnamed	Dusp1	Calm2,Calm3,Ccnd1,Dusp1,Grin2a,Grin2b,Htt,Junb,Kcnmb3,Kcnmb4,Mef2a,Pebp1,Sdc1,Slc25a12,Slc25a13
GO Biological Process	GO:0030258	lipid modification	476	0.244	1	1	3.6	0.278	1	30	0.0222	0.0333	1	18	86	unnamed	unnamed,unnamed,unnamed,unnamed,unnamed,unnamed,unnamed,unnamed,unnamed,unnamed,unnamed,unnamed,unnamed,unnamed,unnamed,unnamed,unnamed,unnamed,unnamed,unnamed,unnamed,unnamed,unnamed,unnamed,unnamed,unnamed,unnamed,unnamed,unnamed,unnamed	Pik3c2b	Adipor1,Agk,Decr1,Hadh,Hao1,Ip6k2,Mtm1,Pex7,Pik3c2b,Pik3c3,Pik3ca,Pik3cd,Pip4k2a,Pla2g7,Ppapdc1a,Slc25a17,Soat1,Synj2
GO Biological Process	GO:0006986	response to unfolded protein	476	0.244	1	1	3.6	0.278	1	30	0.0222	0.0333	1	15	49	unnamed	unnamed,unnamed,unnamed,unnamed,unnamed,unnamed,unnamed,unnamed,unnamed,unnamed,unnamed,unnamed,unnamed,unnamed,unnamed,unnamed,unnamed,unnamed,unnamed,unnamed,unnamed,unnamed,unnamed,unnamed,unnamed,unnamed,unnamed,unnamed,unnamed,unnamed	Hspa1b	Ccnd1,Dnajc3,Edem1,Edem3,Ern1,Ero1l,Erp44,Hsp90aa1,Hspa1b,Hspa4l,Hspb1,Hspd1,Jkamp,Vapb,Wfs1
GO Biological Process	GO:0010970	microtubule-based transport	476	0.244	1	1	3.6	0.278	1	30	0.0222	0.0333	1	9	27	unnamed	unnamed,unnamed,unnamed,unnamed,unnamed,unnamed,unnamed,unnamed,unnamed,unnamed,unnamed,unnamed,unnamed,unnamed,unnamed,unnamed,unnamed,unnamed,unnamed,unnamed,unnamed,unnamed,unnamed,unnamed,unnamed,unnamed,unnamed,unnamed,unnamed,unnamed	Nefm	App,Bicd1,Dync1i1,Htt,Kif5b,Klc1,Mtap1b,Nefm,Ugt8a
GO Biological Process	GO:0021782	glial cell development	476	0.244	1	1	3.6	0.278	1	30	0.0222	0.0333	1	14	59	unnamed	unnamed,unnamed,unnamed,unnamed,unnamed,unnamed,unnamed,unnamed,unnamed,unnamed,unnamed,unnamed,unnamed,unnamed,unnamed,unnamed,unnamed,unnamed,unnamed,unnamed,unnamed,unnamed,unnamed,unnamed,unnamed,unnamed,unnamed,unnamed,unnamed,unnamed	Gfap	Cntn2,Dag1,Fgfr3,Foxd1,Gfap,Gstp1,Hes5,Id4,Lyn,Mpp5,Plp1,Sod1,Sox11,Tcf7l2
GO Biological Process	GO:0019637	organophosphate metabolic process	482	0.247	1	1	2.1	0.954	2	103	0.0444	0.0194	2	53	216	unnamed,unnamed	unnamed,unnamed,unnamed,unnamed,unnamed,unnamed,unnamed,unnamed,unnamed,unnamed,unnamed,unnamed,unnamed,unnamed,unnamed,unnamed,unnamed,unnamed,unnamed,unnamed,unnamed,unnamed,unnamed,unnamed,unnamed,unnamed,unnamed,unnamed,unnamed,unnamed,unnamed,unnamed,unnamed,unnamed,unnamed,unnamed,unnamed,unnamed,unnamed,unnamed,unnamed,unnamed,unnamed,unnamed,unnamed,unnamed,unnamed,unnamed,unnamed,unnamed…	Cwh43,Pik3c2b	Abhd5,Agpat3,Agpat5,Aldh5a1,Apoa1,Aspdh,Cdipt,Cds1,Chka,Cln8,Cwh43,Dpm1,Drd2,Fabp3,Galr2,Gpd1l,Gyk,Htr2a,Ip6k2,Lpcat1,Lpcat4,Lpgat1,Lyst,Mtm1,Oc90,Pcyt1a,Pcyt1b,Pgap2,Pigg,Pigm,Pign,Pigo,Pigs,Pik3c2b,Pik3c3,Pik3ca,Pik3cd,Pip4k2a,Pla2g1b,Pla2g2e,Pla2g4f,Plcb1,Plcg2,Plch2,Pld2,Pmvk,Pon1,Serinc4,Sgms2,Slc27a1,Smpd3,Sptlc2,Synj2
GO Biological Process	GO:0006979	response to oxidative stress	483	0.25	1	1	2.08	0.963	2	104	0.0444	0.0192	2	48	207	unnamed,unnamed	unnamed,unnamed,unnamed,unnamed,unnamed,unnamed,unnamed,unnamed,unnamed,unnamed,unnamed,unnamed,unnamed,unnamed,unnamed,unnamed,unnamed,unnamed,unnamed,unnamed,unnamed,unnamed,unnamed,unnamed,unnamed,unnamed,unnamed,unnamed,unnamed,unnamed,unnamed,unnamed,unnamed,unnamed,unnamed,unnamed,unnamed,unnamed,unnamed,unnamed,unnamed,unnamed,unnamed,unnamed,unnamed,unnamed,unnamed,unnamed,unnamed,unnamed…	Dusp1,Txnrd2	Adnp2,Adrbk1,Atrn,Bcl2,Bnip3,Cln8,Dusp1,Epas1,Ercc3,Etv5,Gclc,Gclm,Gja3,Gnao1,Gstp1,Hao1,Il18bp,Lias,Map3k5,Mb,Mpo,Mt3,Ndufa12,Ndufa6,Pax2,Pebp1,Pld2,Plekha1,Ppargc1a,Ppargc1b,Ppp1r15b,Ppp2ca,Prdx1,Prdx2,Prdx5,Prdx6,Prkca,Psen1,Ptgs1,Rhob,Sdc1,Sod1,Sod3,Srxn1,Trap1,Trpm2,Txnrd2,Ucn
GO Biological Process	GO:0051385	response to mineralocorticoid stimulus	484	0.251	1	1	3.48	0.287	1	31	0.0222	0.0323	1	13	30	unnamed	unnamed,unnamed,unnamed,unnamed,unnamed,unnamed,unnamed,unnamed,unnamed,unnamed,unnamed,unnamed,unnamed,unnamed,unnamed,unnamed,unnamed,unnamed,unnamed,unnamed,unnamed,unnamed,unnamed,unnamed,unnamed,unnamed,unnamed,unnamed,unnamed,unnamed,unnamed	Nefl	Bcl2,Bdh1,Ccnd1,Ctgf,Htr1b,Junb,Nefl,Ntrk3,Pebp1,Prkca,Ptgs1,Slc18a2,Trh
GO Biological Process	GO:0032846	positive regulation of homeostatic process	484	0.251	1	1	3.48	0.287	1	31	0.0222	0.0323	1	11	57	unnamed	unnamed,unnamed,unnamed,unnamed,unnamed,unnamed,unnamed,unnamed,unnamed,unnamed,unnamed,unnamed,unnamed,unnamed,unnamed,unnamed,unnamed,unnamed,unnamed,unnamed,unnamed,unnamed,unnamed,unnamed,unnamed,unnamed,unnamed,unnamed,unnamed,unnamed,unnamed	Tnfrsf11a	Adam8,Lrp6,Mllt11,P2rx4,Ppargc1b,Slc27a1,Spp1,Tnfrsf11a,Tnfsf11,Tnks,Tspo
GO Biological Process	GO:0032526	response to retinoic acid	484	0.251	1	1	3.48	0.287	1	31	0.0222	0.0323	1	16	81	unnamed	unnamed,unnamed,unnamed,unnamed,unnamed,unnamed,unnamed,unnamed,unnamed,unnamed,unnamed,unnamed,unnamed,unnamed,unnamed,unnamed,unnamed,unnamed,unnamed,unnamed,unnamed,unnamed,unnamed,unnamed,unnamed,unnamed,unnamed,unnamed,unnamed,unnamed,unnamed	Dusp1	Adnp2,Clk2,Cyp26b1,Dusp1,Irf1,Klf4,Lep,Lyn,Mll5,Mtap7,Ncoa1,Ntrk3,Osr1,Pax2,Ptk6,Tgfb2
GO Biological Process	GO:0021549	cerebellum development	484	0.251	1	1	3.48	0.287	1	31	0.0222	0.0323	1	9	63	unnamed	unnamed,unnamed,unnamed,unnamed,unnamed,unnamed,unnamed,unnamed,unnamed,unnamed,unnamed,unnamed,unnamed,unnamed,unnamed,unnamed,unnamed,unnamed,unnamed,unnamed,unnamed,unnamed,unnamed,unnamed,unnamed,unnamed,unnamed,unnamed,unnamed,unnamed,unnamed	mt-Nd4	Agtpbp1,Atg7,Ldb1,Lrp6,Myo16,Ncoa1,Ntm,Rora,mt-Nd4
GO Biological Process	GO:0051301	cell division	488	0.252	1	1	1.72	1.74	3	188	0.0667	0.016	2	80	358	unnamed,unnamed,unnamed	unnamed,unnamed,unnamed,unnamed,unnamed,unnamed,unnamed,unnamed,unnamed,unnamed,unnamed,unnamed,unnamed,unnamed,unnamed,unnamed,unnamed,unnamed,unnamed,unnamed,unnamed,unnamed,unnamed,unnamed,unnamed,unnamed,unnamed,unnamed,unnamed,unnamed,unnamed,unnamed,unnamed,unnamed,unnamed,unnamed,unnamed,unnamed,unnamed,unnamed,unnamed,unnamed,unnamed,unnamed,unnamed,unnamed,unnamed,unnamed,unnamed,unnamed…	Chfr,Tipin	4922501C03Rik,Anapc1,Anapc16,Anapc7,Apc,Arhgef2,Arl3,Arl8a,Arpp19,Aspm,Bbs4,Bod1,Ccnd1,Ccnd2,Ccnk,Ccno,Ccnt1,Ccny,Cdc6,Cdk14,Cdk7,Cenpo,Cep110,Cfl1,Chfr,Cinp,Cit,Csnk1a1,Cul3,Dsn1,Dstn,Etv5,Fam83d,Fmn2,Gtpbp8,Haus3,Haus8,Ino80,Kif2a,Lmln,Lrp6,Mastl,Mau2,Mis12,Ncapd2,Nedd9,Nek1,Nek2,Nek4,Numb,Nup43,Nusap1,Pard3,Pard6g,Pdcd6ip,Pds5a,Pik3c3,Pogz,Ppp1cb,Ppp2r2d,Rab11a,Rab11fip3,Rab11fip4,Rab35,Rala,R…
GO Biological Process	GO:0006974	response to DNA damage stimulus	488	0.252	1	1	1.72	1.74	3	188	0.0667	0.016	3	89	417	unnamed,unnamed,unnamed	unnamed,unnamed,unnamed,unnamed,unnamed,unnamed,unnamed,unnamed,unnamed,unnamed,unnamed,unnamed,unnamed,unnamed,unnamed,unnamed,unnamed,unnamed,unnamed,unnamed,unnamed,unnamed,unnamed,unnamed,unnamed,unnamed,unnamed,unnamed,unnamed,unnamed,unnamed,unnamed,unnamed,unnamed,unnamed,unnamed,unnamed,unnamed,unnamed,unnamed,unnamed,unnamed,unnamed,unnamed,unnamed,unnamed,unnamed,unnamed,unnamed,unnamed…	Brca1,Hspa1b,Tipin	2310003H01Rik,Alkbh2,Alkbh3,Alkbh8,Apc,Atm,Atrx,B230120H23Rik,Baz1b,Bcl2,Brca1,Brsk1,C77370,Ccnd1,Ccno,Cdk7,Chek1,Cinp,Clock,Cul4b,Dnaja1,Dyrk2,E2f1,Ercc3,Fancg,Fbxo31,Foxo4,Gm5136,Gtf2h2,Gtf2h5,Hipk2,Hspa1b,Ikbke,Ino80,Ino80d,Ints7,Jmy,Kat5,Lyn,Mastl,Mcm7,Mlh1,Msh2,Msh4,Mus81,Nek1,Nuak1,Paxip1,Pgap2,Polb,Polh,Poll,Polq,Psen1,Psmd4,Rad18,Rad23b,Rad52,Rad9,Rev1,Rev3l,Rnf168,Setx,Sfn,Sfpq,Sgk1,Shpr…
GO Biological Process	GO:0070482	response to oxygen levels	490	0.254	1	1	2.06	0.972	2	105	0.0444	0.019	2	44	228	unnamed,unnamed	unnamed,unnamed,unnamed,unnamed,unnamed,unnamed,unnamed,unnamed,unnamed,unnamed,unnamed,unnamed,unnamed,unnamed,unnamed,unnamed,unnamed,unnamed,unnamed,unnamed,unnamed,unnamed,unnamed,unnamed,unnamed,unnamed,unnamed,unnamed,unnamed,unnamed,unnamed,unnamed,unnamed,unnamed,unnamed,unnamed,unnamed,unnamed,unnamed,unnamed,unnamed,unnamed,unnamed,unnamed,unnamed,unnamed,unnamed,unnamed,unnamed,unnamed…	Mdm4,mt-Nd4	Adam17,Adam8,Apold1,Arnt2,Atm,Atp1b1,Bcl2,Bnip3,Ctgf,Cx3cl1,Ddit4,Drd2,E2f1,Egln1,Epas1,Ercc3,Hmbs,Kcna5,Kcnma1,Lep,Mb,Mdm4,Mlh1,Mmp13,Mt3,Nos1,Nppc,Nrf1,Pld2,Prkce,Ryr2,Ryr3,Smad4,Smad9,Sod3,Stc2,Trh,Ube2b,Uck2,Uts2,Vcam1,Vegfa,Vldlr,mt-Nd4
GO Biological Process	GO:0044262	cellular carbohydrate metabolic process	491	0.254	1	1	1.71	1.75	3	189	0.0667	0.0159	3	83	372	unnamed,unnamed,unnamed	unnamed,unnamed,unnamed,unnamed,unnamed,unnamed,unnamed,unnamed,unnamed,unnamed,unnamed,unnamed,unnamed,unnamed,unnamed,unnamed,unnamed,unnamed,unnamed,unnamed,unnamed,unnamed,unnamed,unnamed,unnamed,unnamed,unnamed,unnamed,unnamed,unnamed,unnamed,unnamed,unnamed,unnamed,unnamed,unnamed,unnamed,unnamed,unnamed,unnamed,unnamed,unnamed,unnamed,unnamed,unnamed,unnamed,unnamed,unnamed,unnamed,unnamed…	Gapdh,Il6st,Ppip5k2	Adrb1,Akt2,Aldh5a1,Aoah,Atf3,B3galnt1,B3galt2,B3gnt3,B3gnt7,Cercam,Chst15,Chst2,Chst7,Cog3,Cps1,Diablo,Dolpp1,Dpm1,Epm2a,Extl2,Fn3k,Fuca2,Fut10,G6pc,Galnt1,Galnt3,Gapdh,Gapdh,Gfpt1,Glt25d1,Glt25d2,Gne,Gnmt,Gnptab,Got1,Gpd1l,Gpi1,Gxylt1,Gyk,H6pd,Hk1,Hkdc1,Hs2st1,Il6st,Itpka,Kcnj11,Khk,Krtcap2,Lep,Man2a2,Man2b2,Mgat2,Mgat5,Pdhb,Pdk1,Pdk3,Pfkfb1,Pgam2,Pgk2,Pgls,Pgm2l1,Phkb,Pik3ca,Pkm2,Ppip5k2,Ppp1cb…
GO Biological Process	GO:0070665	positive regulation of leukocyte proliferation	492	0.258	1	1	3.38	0.296	1	32	0.0222	0.0313	1	13	92	unnamed	unnamed,unnamed,unnamed,unnamed,unnamed,unnamed,unnamed,unnamed,unnamed,unnamed,unnamed,unnamed,unnamed,unnamed,unnamed,unnamed,unnamed,unnamed,unnamed,unnamed,unnamed,unnamed,unnamed,unnamed,unnamed,unnamed,unnamed,unnamed,unnamed,unnamed,unnamed,unnamed	Il6st	Bcl2,Cd276,Cd80,Hes1,Icosl,Il6st,Irs2,Nck1,Sash3,Tac1,Tnfrsf13c,Tnfsf13b,Vcam1
GO Biological Process	GO:0050671	positive regulation of lymphocyte proliferation	492	0.258	1	1	3.38	0.296	1	32	0.0222	0.0313	1	13	89	unnamed	unnamed,unnamed,unnamed,unnamed,unnamed,unnamed,unnamed,unnamed,unnamed,unnamed,unnamed,unnamed,unnamed,unnamed,unnamed,unnamed,unnamed,unnamed,unnamed,unnamed,unnamed,unnamed,unnamed,unnamed,unnamed,unnamed,unnamed,unnamed,unnamed,unnamed,unnamed,unnamed	Il6st	Bcl2,Cd276,Cd80,Hes1,Icosl,Il6st,Irs2,Nck1,Sash3,Tac1,Tnfrsf13c,Tnfsf13b,Vcam1
GO Biological Process	GO:0032946	positive regulation of mononuclear cell proliferation	492	0.258	1	1	3.38	0.296	1	32	0.0222	0.0313	1	13	90	unnamed	unnamed,unnamed,unnamed,unnamed,unnamed,unnamed,unnamed,unnamed,unnamed,unnamed,unnamed,unnamed,unnamed,unnamed,unnamed,unnamed,unnamed,unnamed,unnamed,unnamed,unnamed,unnamed,unnamed,unnamed,unnamed,unnamed,unnamed,unnamed,unnamed,unnamed,unnamed,unnamed	Il6st	Bcl2,Cd276,Cd80,Hes1,Icosl,Il6st,Irs2,Nck1,Sash3,Tac1,Tnfrsf13c,Tnfsf13b,Vcam1
GO Biological Process	GO:0035966	response to topologically incorrect protein	492	0.258	1	1	3.38	0.296	1	32	0.0222	0.0313	1	16	54	unnamed	unnamed,unnamed,unnamed,unnamed,unnamed,unnamed,unnamed,unnamed,unnamed,unnamed,unnamed,unnamed,unnamed,unnamed,unnamed,unnamed,unnamed,unnamed,unnamed,unnamed,unnamed,unnamed,unnamed,unnamed,unnamed,unnamed,unnamed,unnamed,unnamed,unnamed,unnamed,unnamed	Hspa1b	Ccnd1,Dnajc3,Edem1,Edem3,Ern1,Ero1l,Erp44,Hsp90aa1,Hspa1b,Hspa4l,Hspb1,Hspd1,Jkamp,Stub1,Vapb,Wfs1
GO Biological Process	GO:0007010	cytoskeleton organization	496	0.261	1	1	1.54	2.6	4	281	0.0889	0.0142	5	121	478	unnamed,unnamed,unnamed,unnamed	unnamed,unnamed,unnamed,unnamed,unnamed,unnamed,unnamed,unnamed,unnamed,unnamed,unnamed,unnamed,unnamed,unnamed,unnamed,unnamed,unnamed,unnamed,unnamed,unnamed,unnamed,unnamed,unnamed,unnamed,unnamed,unnamed,unnamed,unnamed,unnamed,unnamed,unnamed,unnamed,unnamed,unnamed,unnamed,unnamed,unnamed,unnamed,unnamed,unnamed,unnamed,unnamed,unnamed,unnamed,unnamed,unnamed,unnamed,unnamed,unnamed,unnamed…	Brca1,Epb4.1l1,Gfap,Nefl,Nefm	Ablim1,Actn1,Add2,Agfg1,Apc,Arf6,Arhgap10,Arhgef2,Arrb1,B230120H23Rik,Bbs1,Bbs4,Bcl2,Bcr,Bicd1,Brca1,Brsk1,Camsap1,Capn6,Capza2,Cdc42bpa,Cdk5rap2,Cfl1,Cln8,Cnn3,Cntn2,Coro1c,Coro2b,Coro6,Ctnnb1,Cul3,Daam1,Dag1,Dbn1,Dctn2,Dlg1,Dtnbp1,Elmo1,Enah,Epb4.1,Epb4.1l1,Epb4.1l3,Epb4.1l5,Fert2,Fhdc1,Fitm2,Fmn2,Fmnl2,Gfap,Ghrl,Gm16517,Gpr65,Haus3,Haus6,Haus8,Hdac3,Hook3,Ina,Ino80,Insc,Itgb1,Jmy,Kif2a,Kif3b,K…
GO Biological Process	GO:0070887	cellular response to chemical stimulus	497	0.263	1	1	1.44	3.46	5	374	0.111	0.0134	5	164	857	unnamed,unnamed,unnamed,unnamed,unnamed	unnamed,unnamed,unnamed,unnamed,unnamed,unnamed,unnamed,unnamed,unnamed,unnamed,unnamed,unnamed,unnamed,unnamed,unnamed,unnamed,unnamed,unnamed,unnamed,unnamed,unnamed,unnamed,unnamed,unnamed,unnamed,unnamed,unnamed,unnamed,unnamed,unnamed,unnamed,unnamed,unnamed,unnamed,unnamed,unnamed,unnamed,unnamed,unnamed,unnamed,unnamed,unnamed,unnamed,unnamed,unnamed,unnamed,unnamed,unnamed,unnamed,unnamed…	Brca1,Dusp1,Il6st,Mdm4,Tnfrsf11a	Adam8,Adipor1,Adnp2,Ahr,Akt2,Aqp4,Aqp8,Ar,Asns,Axin2,Bmp7,Bmpr2,Bnip3,Brca1,Btrc,C5ar1,Calca,Ccnd1,Ccnd2,Cdkn1b,Cep57,Chek1,Cps1,Ctnnb1,Cx3cl1,Cxcl13,Cyp26b1,Cyp7a1,Dab2ip,Dnajc3,Dnmt3a,Dock4,Drosha,Dtymk,Dusp1,E2f1,Eif2c2,Eif4ebp2,Epas1,Epb4.1l5,Ern1,Ero1l,Esrrb,Etv5,Fez1,Fgf18,Fgf9,Fgfr3,Fkbp1a,Foxf1a,Foxo4,Foxs1,Frs2,Fyn,Fzd1,Gfpt1,Gm614,Got1,Grin2a,Grin2b,Gstp1,Heyl,Hmbs,Hspb1,Il12rb2,Il18bp,…
GO Biological Process	GO:0016311	dephosphorylation	498	0.264	1	1	2	1	2	108	0.0444	0.0185	2	44	176	unnamed,unnamed	unnamed,unnamed,unnamed,unnamed,unnamed,unnamed,unnamed,unnamed,unnamed,unnamed,unnamed,unnamed,unnamed,unnamed,unnamed,unnamed,unnamed,unnamed,unnamed,unnamed,unnamed,unnamed,unnamed,unnamed,unnamed,unnamed,unnamed,unnamed,unnamed,unnamed,unnamed,unnamed,unnamed,unnamed,unnamed,unnamed,unnamed,unnamed,unnamed,unnamed,unnamed,unnamed,unnamed,unnamed,unnamed,unnamed,unnamed,unnamed,unnamed,unnamed…	Ctdspl2,Dusp1	Bcl2,Btrc,Ctdspl2,Dusp1,Dusp14,Dusp15,Dusp19,Dusp3,Dusp4,Dusp8,Dusp9,Epm2a,Fbxw11,Mtm1,Mtmr12,Mtmr2,Mtmr9,Nceh1,Ppap2a,Ppapdc1a,Ppm1a,Ppm1l,Ppp1cb,Ppp1r12a,Ppp2ca,Ppp2r3a,Ppp3ca,Ptpn18,Ptpn3,Ptpn4,Ptpn9,Ptpra,Ptprb,Ptprd,Ptprg,Ptprm,Ptprn2,Sbf1,Ssh1,Ssh2,Styx,Synj2,Tpte,Ubash3b
GO Biological Process	GO:0019320	hexose catabolic process	499	0.265	1	1	3.27	0.306	1	33	0.0222	0.0303	1	12	58	unnamed	unnamed,unnamed,unnamed,unnamed,unnamed,unnamed,unnamed,unnamed,unnamed,unnamed,unnamed,unnamed,unnamed,unnamed,unnamed,unnamed,unnamed,unnamed,unnamed,unnamed,unnamed,unnamed,unnamed,unnamed,unnamed,unnamed,unnamed,unnamed,unnamed,unnamed,unnamed,unnamed,unnamed	Gapdh	Gapdh,Gapdh,Gpi1,H6pd,Hk1,Hkdc1,Pdhb,Pgam2,Pgk2,Pgls,Pkm2,Rpe
GO Biological Process	GO:0010212	response to ionizing radiation	499	0.265	1	1	3.27	0.306	1	33	0.0222	0.0303	1	19	110	unnamed	unnamed,unnamed,unnamed,unnamed,unnamed,unnamed,unnamed,unnamed,unnamed,unnamed,unnamed,unnamed,unnamed,unnamed,unnamed,unnamed,unnamed,unnamed,unnamed,unnamed,unnamed,unnamed,unnamed,unnamed,unnamed,unnamed,unnamed,unnamed,unnamed,unnamed,unnamed,unnamed,unnamed	Brca1	Atm,Bcl2,Brca1,Ccnd1,Clk2,Clock,Cyp2r1,Gm5136,Ino80,Ints7,Itgb1,Msh2,Nek1,Paxip1,Rad9,Rhob,Rnf168,Stk11,Vcam1
GO Cellular Component	GO:0005925	focal adhesion	1	1.03e-05	0.011	0.011	11.6	0.519	6	56	0.133	0.107	3	26	104	unnamed,unnamed,unnamed,unnamed,unnamed,unnamed	unnamed,unnamed,unnamed,unnamed,unnamed,unnamed,unnamed,unnamed,unnamed,unnamed,unnamed,unnamed,unnamed,unnamed,unnamed,unnamed,unnamed,unnamed,unnamed,unnamed,unnamed,unnamed,unnamed,unnamed,unnamed,unnamed,unnamed,unnamed,unnamed,unnamed,unnamed,unnamed,unnamed,unnamed,unnamed,unnamed,unnamed,unnamed,unnamed,unnamed,unnamed,unnamed,unnamed,unnamed,unnamed,unnamed,unnamed,unnamed,unnamed,unnamed…	Brca1,Gak,Limk1	Actn1,Adam17,Apbb1ip,Brca1,Dag1,Ebag9,Enah,Epb4.1l5,Gak,Hic2,Itga2b,Itgb1,Keap1,Lasp1,Limk1,Palld,Parvb,Parvg,Pnma1,Sdc1,Ssh2,Tln2,Tns1,Vasp,Vcl,Zfyve21
GO Cellular Component	GO:0005924	cell-substrate adherens junction	2	1.26e-05	0.0135	0.00677	11.2	0.537	6	58	0.133	0.103	3	28	110	unnamed,unnamed,unnamed,unnamed,unnamed,unnamed	unnamed,unnamed,unnamed,unnamed,unnamed,unnamed,unnamed,unnamed,unnamed,unnamed,unnamed,unnamed,unnamed,unnamed,unnamed,unnamed,unnamed,unnamed,unnamed,unnamed,unnamed,unnamed,unnamed,unnamed,unnamed,unnamed,unnamed,unnamed,unnamed,unnamed,unnamed,unnamed,unnamed,unnamed,unnamed,unnamed,unnamed,unnamed,unnamed,unnamed,unnamed,unnamed,unnamed,unnamed,unnamed,unnamed,unnamed,unnamed,unnamed,unnamed…	Brca1,Gak,Limk1	Actn1,Adam17,Apbb1ip,Brca1,Ctnnb1,Dag1,Ebag9,Enah,Epb4.1l5,Gak,Hic2,Itga2b,Itgb1,Keap1,Lasp1,Limk1,Nexn,Palld,Parvb,Parvg,Pnma1,Sdc1,Ssh2,Tln2,Tns1,Vasp,Vcl,Zfyve21
GO Cellular Component	GO:0030055	cell-substrate junction	3	1.86e-05	0.02	0.00667	10.5	0.574	6	62	0.133	0.0968	3	31	115	unnamed,unnamed,unnamed,unnamed,unnamed,unnamed	unnamed,unnamed,unnamed,unnamed,unnamed,unnamed,unnamed,unnamed,unnamed,unnamed,unnamed,unnamed,unnamed,unnamed,unnamed,unnamed,unnamed,unnamed,unnamed,unnamed,unnamed,unnamed,unnamed,unnamed,unnamed,unnamed,unnamed,unnamed,unnamed,unnamed,unnamed,unnamed,unnamed,unnamed,unnamed,unnamed,unnamed,unnamed,unnamed,unnamed,unnamed,unnamed,unnamed,unnamed,unnamed,unnamed,unnamed,unnamed,unnamed,unnamed…	Brca1,Gak,Limk1	Actn1,Adam17,Apbb1ip,Brca1,Col17a1,Ctnnb1,Dag1,Ebag9,Enah,Epb4.1l5,Erbb2ip,Gak,Hic2,Itga2b,Itgb1,Itgb4,Keap1,Lasp1,Limk1,Nexn,Palld,Parvb,Parvg,Pnma1,Sdc1,Ssh2,Tln2,Tns1,Vasp,Vcl,Zfyve21
[truncated: 3,165 more rows]
